# Supplementary material for: The Genomic Landscape of Head and Neck Cancer-associated Streptococci
Source: Research Square preprint supplement (doi:10.21203/rs.3.rs-8400357/v1), 2026-01-09
Supplement: Supplementary file 1 [file 47110064a82b507b45c2cde2.xlsx]

## Sheet: all_isolates
	Supplementary Table 1: Isolates identified using Nanopore sequencing but not retained for whole-genome assembly
Date_Sequenced	isolate_id	Patient	Phylum	Class	Order	Family	Genus	Location	Species	Sub-species	gtdb_classificaiton
pre_070623	8305AN2	8305	Bacillota	Bacilli	Lactobacillales	Streptococcaceae	Streptococcus	Oral cavity	Streptococcus BHI	Streptococcus BHI	d__Bacteria;p__Bacillota;c__Bacilli;o__Lactobacillales;f__Streptococcaceae;g__Streptococcus;s__
pre_070623	8305AN3	8305	Bacillota	Bacilli	Lactobacillales	Streptococcaceae	Streptococcus	Oral cavity	Streptococcus BHI	Streptococcus BHI	d__Bacteria;p__Bacillota;c__Bacilli;o__Lactobacillales;f__Streptococcaceae;g__Streptococcus;s__
pre_070623	8305AN4	8305	Bacillota	Bacilli	Lactobacillales	Streptococcaceae	Streptococcus	Oral cavity	Streptococcus BHI	Streptococcus BHI	d__Bacteria;p__Bacillota;c__Bacilli;o__Lactobacillales;f__Streptococcaceae;g__Streptococcus;s__
pre_070623	8305AN5	8305	Bacillota	Bacilli	Staphylococcales	Staphylococcaceae	Staphylococcus	Oral cavity	Staphylococcus warneri	Staphylococcus warneri	d__Bacteria;p__Bacillota;c__Bacilli;o__Staphylococcales;f__Staphylococcaceae;g__Staphylococcus;s__Staphylococcus warneri
pre_070623	8305OA1	8305	Actinomycetota	Actinomycetia	Actinomycetales	Micrococcaceae	Rothia	Oral cavity	Rothia mucilaginosa	Rothia mucilaginosa	d__Bacteria;p__Actinomycetota;c__Actinomycetia;o__Actinomycetales;f__Micrococcaceae;g__Rothia;s__Rothia mucilaginosa
pre_070623	8305OA4	8305	Bacillota	Bacilli	Lactobacillales	Streptococcaceae	Streptococcus	Oral cavity	Streptococcus BHI	Streptococcus BHI	d__Bacteria;p__Bacillota;c__Bacilli;o__Lactobacillales;f__Streptococcaceae;g__Streptococcus;s__
pre_070623	8324AN10	8324	Pseudomonadota	Gammaproteobacteria	Enterobacterales	Enterobacteriaceae	Escherichia	Oral cavity	Escherichia coli	Escherichia coli	d__Bacteria;p__Pseudomonadota;c__Gammaproteobacteria;o__Enterobacterales;f__Enterobacteriaceae;g__Escherichia;s__Escherichia coli
pre_070623	8324AN2	8324	Pseudomonadota	Gammaproteobacteria	Enterobacterales	Enterobacteriaceae	Escherichia	Oral cavity	Escherichia coli	Escherichia coli	d__Bacteria;p__Pseudomonadota;c__Gammaproteobacteria;o__Enterobacterales;f__Enterobacteriaceae;g__Escherichia;s__Escherichia coli
pre_070623	8324AN4	8324	Pseudomonadota	Gammaproteobacteria	Enterobacterales	Enterobacteriaceae	Escherichia	Oral cavity	Escherichia coli	Escherichia coli	d__Bacteria;p__Pseudomonadota;c__Gammaproteobacteria;o__Enterobacterales;f__Enterobacteriaceae;g__Escherichia;s__Escherichia coli
pre_070623	8324AN5	8324	Pseudomonadota	Gammaproteobacteria	Enterobacterales	Enterobacteriaceae	Escherichia	Oral cavity	Escherichia coli	Escherichia coli	d__Bacteria;p__Pseudomonadota;c__Gammaproteobacteria;o__Enterobacterales;f__Enterobacteriaceae;g__Escherichia;s__Escherichia coli
pre_070623	8324AN6	8324	Pseudomonadota	Gammaproteobacteria	Enterobacterales	Enterobacteriaceae	Escherichia	Oral cavity	Escherichia coli	Escherichia coli	d__Bacteria;p__Pseudomonadota;c__Gammaproteobacteria;o__Enterobacterales;f__Enterobacteriaceae;g__Escherichia;s__Escherichia coli
pre_070623	8324AN7	8324	Pseudomonadota	Gammaproteobacteria	Enterobacterales	Enterobacteriaceae	Escherichia	Oral cavity	Escherichia coli	Escherichia coli	d__Bacteria;p__Pseudomonadota;c__Gammaproteobacteria;o__Enterobacterales;f__Enterobacteriaceae;g__Escherichia;s__Escherichia coli
pre_070623	8324OA1	8324	Pseudomonadota	Gammaproteobacteria	Enterobacterales	Enterobacteriaceae	Escherichia	Oral cavity	Escherichia coli	Escherichia coli	d__Bacteria;p__Pseudomonadota;c__Gammaproteobacteria;o__Enterobacterales;f__Enterobacteriaceae;g__Escherichia;s__Escherichia coli
pre_070623	8324OA8	8324	Bacillota	Bacilli	Lactobacillales	Streptococcaceae	Streptococcus	Oral cavity	Streptococcus BHI	Streptococcus BHI	d__Bacteria;p__Bacillota;c__Bacilli;o__Lactobacillales;f__Streptococcaceae;g__Streptococcus;s__
pre_070623	8324OAN8	8324	Bacillota	Bacilli	Lactobacillales	Streptococcaceae	Streptococcus	Oral cavity	Streptococcus parasanguinis	Streptococcus parasanguinis_B	d__Bacteria;p__Bacillota;c__Bacilli;o__Lactobacillales;f__Streptococcaceae;g__Streptococcus;s__Streptococcus parasanguinis_B
pre_070623	8324OAN9	8324	Pseudomonadota	Gammaproteobacteria	Enterobacterales	Enterobacteriaceae	Escherichia	Oral cavity	Escherichia coli	Escherichia coli	d__Bacteria;p__Pseudomonadota;c__Gammaproteobacteria;o__Enterobacterales;f__Enterobacteriaceae;g__Escherichia;s__Escherichia coli
pre_070623	8337AN1	8337	Pseudomonadota	Gammaproteobacteria	Enterobacterales	Enterobacteriaceae	Escherichia	Oral cavity	Escherichia coli	Escherichia coli	d__Bacteria;p__Pseudomonadota;c__Gammaproteobacteria;o__Enterobacterales;f__Enterobacteriaceae;g__Escherichia;s__Escherichia coli
pre_070623	8337AN2	8337	Pseudomonadota	Gammaproteobacteria	Enterobacterales	Enterobacteriaceae	Escherichia	Oral cavity	Escherichia coli	Escherichia coli	d__Bacteria;p__Pseudomonadota;c__Gammaproteobacteria;o__Enterobacterales;f__Enterobacteriaceae;g__Escherichia;s__Escherichia coli
pre_070623	8355A1	8355	Bacillota	Bacilli	Lactobacillales	Streptococcaceae	Streptococcus	Oral cavity	Streptococcus salivarius	Streptococcus salivarius	d__Bacteria;p__Bacillota;c__Bacilli;o__Lactobacillales;f__Streptococcaceae;g__Streptococcus;s__Streptococcus salivarius
pre_070623	8355A2	8355	Pseudomonadota	Gammaproteobacteria	Burkholderiales	Neisseriaceae	Neisseria	Oral cavity	Neisseria	Neisseria	d__Bacteria;p__Pseudomonadota;c__Gammaproteobacteria;o__Burkholderiales;f__Neisseriaceae;g__Neisseria;s__
pre_070623	8355A3	8355	Pseudomonadota	Gammaproteobacteria	Burkholderiales	Neisseriaceae	Neisseria	Oral cavity	Neisseria flavescens	Neisseria flavescens_B	d__Bacteria;p__Pseudomonadota;c__Gammaproteobacteria;o__Burkholderiales;f__Neisseriaceae;g__Neisseria;s__Neisseria flavescens_B
pre_070623	8355A4	8355	Pseudomonadota	Gammaproteobacteria	Burkholderiales	Neisseriaceae	Neisseria	Oral cavity	Neisseria perflava	Neisseria perflava	d__Bacteria;p__Pseudomonadota;c__Gammaproteobacteria;o__Burkholderiales;f__Neisseriaceae;g__Neisseria;s__Neisseria perflava
pre_070623	8355A6	8355	Bacillota	Bacilli	Lactobacillales	Streptococcaceae	Streptococcus	Oral cavity	Streptococcus salivarius	Streptococcus salivarius_D	d__Bacteria;p__Bacillota;c__Bacilli;o__Lactobacillales;f__Streptococcaceae;g__Streptococcus;s__Streptococcus salivarius_D
pre_070623	8355AN1	8355	Bacillota	Bacilli	Lactobacillales	Streptococcaceae	Streptococcus	Oral cavity	Streptococcus infantis	Streptococcus infantis_F	d__Bacteria;p__Bacillota;c__Bacilli;o__Lactobacillales;f__Streptococcaceae;g__Streptococcus;s__Streptococcus infantis_F
pre_070623	8355AN2	8355	Bacillota	Bacilli	Lactobacillales	Streptococcaceae	Streptococcus	Oral cavity	Streptococcus salivarius	Streptococcus salivarius_D	d__Bacteria;p__Bacillota;c__Bacilli;o__Lactobacillales;f__Streptococcaceae;g__Streptococcus;s__Streptococcus salivarius_D
pre_070623	8389AN2	8389	Bacillota	Bacilli	Staphylococcales	Staphylococcaceae	Staphylococcus	Oral cavity	Staphylococcus aureus	Staphylococcus aureus	d__Bacteria;p__Bacillota;c__Bacilli;o__Staphylococcales;f__Staphylococcaceae;g__Staphylococcus;s__Staphylococcus aureus
pre_070623	8389DM2	8389	Bacillota	Bacilli	Staphylococcales	Staphylococcaceae	Staphylococcus	Digested tumour	Staphylococcus aureus	Staphylococcus aureus	d__Bacteria;p__Bacillota;c__Bacilli;o__Staphylococcales;f__Staphylococcaceae;g__Staphylococcus;s__Staphylococcus aureus
pre_070623	8389DM3	8389	Bacteroidota	Bacteroidia	Bacteroidales	Bacteroidaceae	Prevotella	Digested tumour	Prevotella	Prevotella	d__Bacteria;p__Bacteroidota;c__Bacteroidia;o__Bacteroidales;f__Bacteroidaceae;g__Prevotella;s__
pre_070623	8389DM5	8389	Bacteroidota	Bacteroidia	Bacteroidales	Bacteroidaceae	Prevotella	Digested tumour	Prevotella	Prevotella	d__Bacteria;p__Bacteroidota;c__Bacteroidia;o__Bacteroidales;f__Bacteroidaceae;g__Prevotella;s__
pre_070623	8389DM6	8389	Bacillota	Clostridia	peptostreptococcales	Peptostreptococcaceae	Peptostreptococcus	Digested tumour	Peptostreptococcus anaerobius	Peptostreptococcus anaerobius	d__Bacteria;p__Bacillota_A;c__Clostridia;o__Peptostreptococcales;f__Peptostreptococcaceae;g__Peptostreptococcus;s__Peptostreptococcus anaerobius
pre_070623	8389O1	8389	Bacillota	Bacilli	Lactobacillales	Streptococcaceae	Streptococcus	Oral cavity	Streptococcus sp	Streptococcus sp000187445	d__Bacteria;p__Bacillota;c__Bacilli;o__Lactobacillales;f__Streptococcaceae;g__Streptococcus;s__Streptococcus sp000187445
pre_070623	8389O2	8389	Pseudomonadota	Gammaproteobacteria	Enterobacterales	Enterobacteriaceae	Escherichia	Oral cavity	Escherichia coli	Escherichia coli	d__Bacteria;p__Pseudomonadota;c__Gammaproteobacteria;o__Enterobacterales;f__Enterobacteriaceae;g__Escherichia;s__Escherichia coli
pre_070623	8389O4	8389	Bacillota	Bacilli	Lactobacillales	Streptococcaceae	Streptococcus	Oral cavity	Streptococcus sp	Streptococcus sp013394695	d__Bacteria;p__Bacillota;c__Bacilli;o__Lactobacillales;f__Streptococcaceae;g__Streptococcus;s__Streptococcus sp013394695
pre_070623	8389OA5	8389	Bacillota	Bacilli	Lactobacillales	Streptococcaceae	Streptococcus	Oral cavity	Streptococcus sp	Streptococcus sp000187445	d__Bacteria;p__Bacillota;c__Bacilli;o__Lactobacillales;f__Streptococcaceae;g__Streptococcus;s__Streptococcus sp000187445
pre_070623	8389S2	8389	Bacillota	Bacilli	Lactobacillales	Streptococcaceae	Streptococcus	Oral cavity	Streptococcus oralis	Streptococcus oralis_AC	d__Bacteria;p__Bacillota;c__Bacilli;o__Lactobacillales;f__Streptococcaceae;g__Streptococcus;s__Streptococcus oralis_AC
pre_070623	8389S5	8389	Bacillota	Bacilli	Staphylococcales	Staphylococcaceae	Staphylococcus	Oral cavity	Staphylococcus aureus	Staphylococcus aureus	d__Bacteria;p__Bacillota;c__Bacilli;o__Staphylococcales;f__Staphylococcaceae;g__Staphylococcus;s__Staphylococcus aureus
pre_070623	8389SA3	8389	Bacillota	Bacilli	Lactobacillales	Streptococcaceae	Streptococcus	Oral cavity	Streptococcus salivarius	Streptococcus salivarius	d__Bacteria;p__Bacillota;c__Bacilli;o__Lactobacillales;f__Streptococcaceae;g__Streptococcus;s__Streptococcus salivarius
pre_070623	8389SA4	8389	Bacillota	Bacilli	Lactobacillales	Streptococcaceae	Streptococcus	Oral cavity	Streptococcus sp	Streptococcus sp001556435	d__Bacteria;p__Bacillota;c__Bacilli;o__Lactobacillales;f__Streptococcaceae;g__Streptococcus;s__Streptococcus sp001556435
pre_070623	8399OA1	8399	Actinomycetota	Actinomycetia	Actinomycetales	Micrococcaceae	Rothia	Oral cavity	Rothia mucilaginosa	Rothia mucilaginosa_A	d__Bacteria;p__Actinomycetota;c__Actinomycetia;o__Actinomycetales;f__Micrococcaceae;g__Rothia;s__Rothia mucilaginosa_A
pre_070623	8408A2	8408	Bacillota	Bacilli	Lactobacillales	Streptococcaceae	Streptococcus	Oral cavity	Streptococcus mitis	Streptococcus mitis_Y	d__Bacteria;p__Bacillota;c__Bacilli;o__Lactobacillales;f__Streptococcaceae;g__Streptococcus;s__Streptococcus mitis_Y
pre_070623	8408OA1	8408	Bacillota	Bacilli	Lactobacillales	Streptococcaceae	Enterococcus	Oral cavity	Enterococcus faecalis	Enterococcus faecalis	d__Bacteria;p__Bacillota;c__Bacilli;o__Lactobacillales;f__Enterococcaceae;g__Enterococcus;s__Enterococcus faecalis
pre_070623	8408OA3	8408	Bacillota	Bacilli	Lactobacillales	Streptococcaceae	Streptococcus	Oral cavity	Streptococcus parasanguinis	Streptococcus parasanguinis_D	d__Bacteria;p__Bacillota;c__Bacilli;o__Lactobacillales;f__Streptococcaceae;g__Streptococcus;s__Streptococcus parasanguinis_D
pre_070623	8408OA5	8408	Pseudomonadota	Gammaproteobacteria	Pseudomonadales	Pseudomonadaceae	Pseudomonas	Oral cavity	Pseudomonas aeruginosa	Pseudomonas aeruginosa	d__Bacteria;p__Pseudomonadota;c__Gammaproteobacteria;o__Pseudomonadales;f__Pseudomonadaceae;g__Pseudomonas;s__Pseudomonas aeruginosa
pre_070623	8420OA2	8420	Bacillota	Bacilli	Lactobacillales	Streptococcaceae	Streptococcus	Oral cavity	Streptococcus oralis	Streptococcus oralis_S	d__Bacteria;p__Bacillota;c__Bacilli;o__Lactobacillales;f__Streptococcaceae;g__Streptococcus;s__Streptococcus oralis_S
pre_070623	8420OA3	8420	Bacillota	Bacilli	Lactobacillales	Streptococcaceae	Streptococcus	Oral cavity	Streptococcus hominis	Streptococcus hominis	d__Bacteria;p__Bacillota;c__Bacilli;o__Lactobacillales;f__Streptococcaceae;g__Streptococcus;s__Streptococcus hominis
pre_070623	8421A4	8421	Bacillota	Bacilli	Lactobacillales	Streptococcaceae	Streptococcus	Oral cavity	Streptococcus parasanguinis	Streptococcus parasanguinis_D	d__Bacteria;p__Bacillota;c__Bacilli;o__Lactobacillales;f__Streptococcaceae;g__Streptococcus;s__Streptococcus parasanguinis_D
pre_070623	8421AN4	8421	Bacillota	Bacilli	Lactobacillales	Streptococcaceae	Streptococcus	Oral cavity	Streptococcus parasanguinis	Streptococcus parasanguinis_D	d__Bacteria;p__Bacillota;c__Bacilli;o__Lactobacillales;f__Streptococcaceae;g__Streptococcus;s__Streptococcus parasanguinis_D
pre_070623	8421OA2	8421	Bacillota	Bacilli	Lactobacillales	Streptococcaceae	Streptococcus	Oral cavity	Streptococcus parasanguinis	Streptococcus parasanguinis_D	d__Bacteria;p__Bacillota;c__Bacilli;o__Lactobacillales;f__Streptococcaceae;g__Streptococcus;s__Streptococcus parasanguinis_D
pre_070623	8421OA3	8421	Bacillota	Bacilli	Lactobacillales	Streptococcaceae	Streptococcus	Oral cavity	Streptococcus salivarius	Streptococcus salivarius	d__Bacteria;p__Bacillota;c__Bacilli;o__Lactobacillales;f__Streptococcaceae;g__Streptococcus;s__Streptococcus salivarius
pre_070623	8421OA4	8421	Pseudomonadota	Gammaproteobacteria	Burkholderiales	Neisseriaceae	Neisseria	Oral cavity	Neisseria perflava	Neisseria perflava	d__Bacteria;p__Pseudomonadota;c__Gammaproteobacteria;o__Burkholderiales;f__Neisseriaceae;g__Neisseria;s__Neisseria perflava
pre_070623	8431AN1	8431	Bacillota	Bacilli	Lactobacillales	Streptococcaceae	Streptococcus	Oral cavity	Streptococcus mitis	Streptococcus mitis	d__Bacteria;p__Bacillota;c__Bacilli;o__Lactobacillales;f__Streptococcaceae;g__Streptococcus;s__Streptococcus mitis
pre_070623	8431AN6	8431	Bacillota	Bacilli	Lactobacillales	Streptococcaceae	Streptococcus	Oral cavity	Streptococcus BHI	Streptococcus BHI	d__Bacteria;p__Bacillota;c__Bacilli;o__Lactobacillales;f__Streptococcaceae;g__Streptococcus;s__
pre_070623	8431AN7	8431	Bacillota	Bacilli	Lactobacillales	Streptococcaceae	Streptococcus	Oral cavity	Streptococcus mitis	Streptococcus mitis_AC	d__Bacteria;p__Bacillota;c__Bacilli;o__Lactobacillales;f__Streptococcaceae;g__Streptococcus;s__Streptococcus mitis_AC
pre_070623	8451AG1	8451	Bacillota	Bacilli	Lactobacillales	Streptococcaceae	Streptococcus	Digested tumour	Streptococcus sp	Streptococcus sp019448285	d__Bacteria;p__Bacillota;c__Bacilli;o__Lactobacillales;f__Streptococcaceae;g__Streptococcus;s__Streptococcus sp019448285
pre_070623	8451AG2	8451	Bacillota	Bacilli	Lactobacillales	Streptococcaceae	Streptococcus	Digested tumour	Streptococcus infantis	Streptococcus infantis_I	d__Bacteria;p__Bacillota;c__Bacilli;o__Lactobacillales;f__Streptococcaceae;g__Streptococcus;s__Streptococcus infantis_I
pre_070623	8451AG5	8451	Pseudomonadota	Gammaproteobacteria	Burkholderiales	Neisseriaceae	Neisseria	Digested tumour	Neisseria perflava	Neisseria perflava	d__Bacteria;p__Pseudomonadota;c__Gammaproteobacteria;o__Burkholderiales;f__Neisseriaceae;g__Neisseria;s__Neisseria perflava
pre_070623	8451AG6	8451	Bacillota	Bacilli	Lactobacillales	Streptococcaceae	Streptococcus	Digested tumour	Streptococcus BHI	Streptococcus BHI	d__Bacteria;p__Bacillota;c__Bacilli;o__Lactobacillales;f__Streptococcaceae;g__Streptococcus;s__
pre_070623	8451AG7	8451	Bacillota	Bacilli	Lactobacillales	Streptococcaceae	Streptococcus	Digested tumour	Streptococcus oralis	Streptococcus oralis_BA	d__Bacteria;p__Bacillota;c__Bacilli;o__Lactobacillales;f__Streptococcaceae;g__Streptococcus;s__Streptococcus oralis_BA
pre_070623	8451AN7	8451	Actinomycetota	Actinomycetia	Actinomycetales	Actinomycetaceae	Pauljensenia	Oral cavity	Pauljensenia sp	Pauljensenia sp000185285	d__Bacteria;p__Actinomycetota;c__Actinomycetia;o__Actinomycetales;f__Actinomycetaceae;g__Pauljensenia;s__Pauljensenia sp000185285
pre_070623	8451ANG1	8451	Bacillota	Bacilli	Lactobacillales	Streptococcaceae	Streptococcus	Digested tumour	Streptococcus gordonii	Streptococcus gordonii	d__Bacteria;p__Bacillota;c__Bacilli;o__Lactobacillales;f__Streptococcaceae;g__Streptococcus;s__Streptococcus gordonii
pre_070623	8451ANG2	8451	Bacillota	Bacilli	Lactobacillales	Streptococcaceae	Streptococcus	Digested tumour	Streptococcus gordonii	Streptococcus gordonii	d__Bacteria;p__Bacillota;c__Bacilli;o__Lactobacillales;f__Streptococcaceae;g__Streptococcus;s__Streptococcus gordonii
pre_070623	8451ANG5	8451	Bacillota	Bacilli	Lactobacillales	Streptococcaceae	Streptococcus	Digested tumour	Streptococcus gordonii	Streptococcus gordonii	d__Bacteria;p__Bacillota;c__Bacilli;o__Lactobacillales;f__Streptococcaceae;g__Streptococcus;s__Streptococcus gordonii
pre_070623	8451ANG6	8451	Bacillota	Bacilli	Lactobacillales	Streptococcaceae	Streptococcus	Digested tumour	Streptococcus gordonii	Streptococcus gordonii	d__Bacteria;p__Bacillota;c__Bacilli;o__Lactobacillales;f__Streptococcaceae;g__Streptococcus;s__Streptococcus hominis
pre_070623	8451ANT1	8451	Bacillota	Bacilli	Lactobacillales	Streptococcaceae	Streptococcus	Digested tumour	Streptococcus BHI	Streptococcus BHI	d__Bacteria;p__Bacillota;c__Bacilli;o__Lactobacillales;f__Streptococcaceae;g__Streptococcus;s__
pre_070623	8451ANT4	8451	Bacillota	Bacilli	Lactobacillales	Streptococcaceae	Streptococcus	Digested tumour	Streptococcus infantis	Streptococcus infantis_M	d__Bacteria;p__Bacillota;c__Bacilli;o__Lactobacillales;f__Streptococcaceae;g__Streptococcus;s__Streptococcus infantis_M
pre_070623	8451AT1	8451	Pseudomonadota	Gammaproteobacteria	Burkholderiales	Neisseriaceae	Neisseria	Digested tumour	Neisseria perflava	Neisseria perflava	d__Bacteria;p__Pseudomonadota;c__Gammaproteobacteria;o__Burkholderiales;f__Neisseriaceae;g__Neisseria;s__Neisseria perflava
pre_070623	8451AT4	8451	Bacillota	Bacilli	Lactobacillales	Streptococcaceae	Streptococcus	Digested tumour	Streptococcus gordonii	Streptococcus gordonii	d__Bacteria;p__Bacillota;c__Bacilli;o__Lactobacillales;f__Streptococcaceae;g__Streptococcus;s__Streptococcus gordonii
pre_070623	8451AT5	8451	Bacillota	Bacilli	Lactobacillales	Streptococcaceae	Streptococcus	Digested tumour	Streptococcus infantis	Streptococcus infantis_I	d__Bacteria;p__Bacillota;c__Bacilli;o__Lactobacillales;f__Streptococcaceae;g__Streptococcus;s__Streptococcus infantis_I
pre_070623	8451AT6	8451	Bacillota	Bacilli	Lactobacillales	Streptococcaceae	Streptococcus	Digested tumour	Streptococcus infantis	Streptococcus infantis_M	d__Bacteria;p__Bacillota;c__Bacilli;o__Lactobacillales;f__Streptococcaceae;g__Streptococcus;s__Streptococcus infantis_M
pre_070623	8451AT7	8451	Bacillota	Bacilli	Lactobacillales	Streptococcaceae	Streptococcus	Digested tumour	Streptococcus sanguinis	Streptococcus sanguinis_O	d__Bacteria;p__Bacillota;c__Bacilli;o__Lactobacillales;f__Streptococcaceae;g__Streptococcus;s__Streptococcus sanguinis_O
pre_070623	8451AT8	8451	Bacillota	Bacilli	Lactobacillales	Streptococcaceae	Streptococcus	Digested tumour	Streptococcus BHI	Streptococcus BHI	d__Bacteria;p__Bacillota;c__Bacilli;o__Lactobacillales;f__Streptococcaceae;g__Streptococcus;s__
pre_070623	8451DM1	8451	Bacillota	Bacilli	Staphylococcales	Staphylococcaceae	Staphylococcus	Digested tumour	Staphylococcus aureus	Staphylococcus aureus	d__Bacteria;p__Bacillota;c__Bacilli;o__Staphylococcales;f__Staphylococcaceae;g__Staphylococcus;s__Staphylococcus aureus
pre_070623	8451DM10	8451	Bacillota	Bacilli	Lactobacillales	Streptococcaceae	Streptococcus	Digested tumour	Streptococcus hominis	Streptococcus hominis	d__Bacteria;p__Bacillota;c__Bacilli;o__Lactobacillales;f__Streptococcaceae;g__Streptococcus;s__Streptococcus hominis
pre_070623	8451DM12	8451	Bacillota	Bacilli	Lactobacillales	Streptococcaceae	Streptococcus	Digested tumour	Streptococcus gordonii	Streptococcus gordonii	d__Bacteria;p__Bacillota;c__Bacilli;o__Lactobacillales;f__Streptococcaceae;g__Streptococcus;s__Streptococcus gordonii
pre_070623	8451DM13	8451	Bacillota	Bacilli	Lactobacillales	Streptococcaceae	Streptococcus	Digested tumour	Streptococcus gordonii	Streptococcus gordonii	d__Bacteria;p__Bacillota;c__Bacilli;o__Lactobacillales;f__Streptococcaceae;g__Streptococcus;s__Streptococcus gordonii
pre_070623	8451DM14	8451	Bacillota	Bacilli	Staphylococcales	Gemellaceae	Gemella	Digested tumour	Gemella haemolysans	Gemella haemolysans_A	d__Bacteria;p__Bacillota;c__Bacilli;o__Staphylococcales;f__Gemellaceae;g__Gemella;s__Gemella haemolysans_A
pre_070623	8451DM15	8451	Bacillota	Bacilli	Staphylococcales	Staphylococcaceae	Staphylococcus	Digested tumour	Staphylococcus aureus	Staphylococcus aureus	d__Bacteria;p__Bacillota;c__Bacilli;o__Staphylococcales;f__Staphylococcaceae;g__Staphylococcus;s__Staphylococcus aureus
pre_070623	8451DM4	8451	Bacillota	Bacilli	Lactobacillales	Streptococcaceae	Streptococcus	Digested tumour	Streptococcus oralis	Streptococcus oralis	d__Bacteria;p__Bacillota;c__Bacilli;o__Lactobacillales;f__Streptococcaceae;g__Streptococcus;s__Streptococcus oralis
pre_070623	8451DM8	8451	Bacillota	Bacilli	Lactobacillales	Streptococcaceae	Streptococcus	Digested tumour	Streptococcus hominis	Streptococcus hominis	d__Bacteria;p__Bacillota;c__Bacilli;o__Lactobacillales;f__Streptococcaceae;g__Streptococcus;s__Streptococcus hominis
pre_070623	8451DM9	8451	Bacillota	Bacilli	Lactobacillales	Streptococcaceae	Streptococcus	Digested tumour	Streptococcus mitis	Streptococcus mitis	d__Bacteria;p__Bacillota;c__Bacilli;o__Lactobacillales;f__Streptococcaceae;g__Streptococcus;s__Streptococcus mitis
pre_070623	8457AN2	8457	Pseudomonadota	Gammaproteobacteria	Enterobacterales	Enterobacteriaceae	Escherichia	Oral cavity	Escherichia coli	Escherichia coli	d__Bacteria;p__Pseudomonadota;c__Gammaproteobacteria;o__Enterobacterales;f__Enterobacteriaceae;g__Escherichia;s__Escherichia coli
pre_070623	8457AN7	8457	Bacillota	Bacilli	Lactobacillales	Streptococcaceae	Streptococcus	Oral cavity	Streptococcus infantis	Streptococcus infantis_F	d__Bacteria;p__Bacillota;c__Bacilli;o__Lactobacillales;f__Streptococcaceae;g__Streptococcus;s__Streptococcus infantis_F
pre_070623	8457ANT31	8457	Actinomycetota	Actinomycetia	Actinomycetales	Actinomycetaceae	Pauljensenia	Digested tumour	Pauljensenia sp	Pauljensenia sp927911615	d__Bacteria;p__Actinomycetota;c__Actinomycetes;o__Actinomycetales;f__Actinomycetaceae;g__Pauljensenia;s__Pauljensenia sp927911615
pre_070623	8457AT2	8457	Bacillota	Bacilli	Lactobacillales	Streptococcaceae	Streptococcus	Digested tumour	Streptococcus salivarius	Streptococcus salivarius	d__Bacteria;p__Bacillota;c__Bacilli;o__Lactobacillales;f__Streptococcaceae;g__Streptococcus;s__Streptococcus salivarius
pre_070623	8457OAN1	8457	Bacillota	Bacilli	Lactobacillales	Streptococcaceae	Streptococcus	Oral cavity	Streptococcus sp	Streptococcus sp002238115	d__Bacteria;p__Bacillota;c__Bacilli;o__Lactobacillales;f__Streptococcaceae;g__Streptococcus;s__Streptococcus sp002238115
pre_070623	8457OAN3	8457	Bacillota	Bacilli	Lactobacillales	Streptococcaceae	Streptococcus	Oral cavity	Streptococcus infantis	Streptococcus infantis_F	d__Bacteria;p__Bacillota;c__Bacilli;o__Lactobacillales;f__Streptococcaceae;g__Streptococcus;s__Streptococcus infantis_F
pre_070623	8457OAN4	8457	Bacillota	Bacilli	Lactobacillales	Streptococcaceae	Streptococcus	Oral cavity	Streptococcus infantis	Streptococcus infantis_F	d__Bacteria;p__Bacillota;c__Bacilli;o__Lactobacillales;f__Streptococcaceae;g__Streptococcus;s__Streptococcus infantis_F
pre_070623	8457T1	8457	Bacillota	Bacilli	Paenibacillales	Paenibacillaceae	Paenibacillus	Digested tumour	Paenibacillus	Paenibacillus	d__Bacteria;p__Bacillota;c__Bacilli;o__Paenibacillales;f__Paenibacillaceae;g__Paenibacillus;s__
8468T2	8468T2							Digested tumour	Streptococcus BHI	Streptococcus BHI	d__Bacteria;p__Bacillota;c__Bacilli;o__Lactobacillales;f__Streptococcaceae;g__Streptococcus;s__
pre_070623	8468AN4	8468	Bacillota	Bacilli	Lactobacillales	Streptococcaceae	Streptococcus	Oral cavity	Streptococcus rubneri	Streptococcus rubneri	d__Bacteria;p__Bacillota;c__Bacilli;o__Lactobacillales;f__Streptococcaceae;g__Streptococcus;s__Streptococcus rubneri
pre_070623	8468AN5	8468	Actinomycetota	Actinomycetia	Actinomycetales	Actinomycetaceae	Actinomyces	Oral cavity	Actinomyces naeslundii	Actinomyces naeslundii	d__Bacteria;p__Actinomycetota;c__Actinomycetia;o__Actinomycetales;f__Actinomycetaceae;g__Actinomyces;s__Actinomyces naeslundii
pre_070623	8468DM1	8468	Pseudomonadota	Gammaproteobacteria	Enterobacterales	Enterobacteriaceae	Enterobacter	Digested tumour	Enterobacter hormaechei	Enterobacter hormaechei_A	d__Bacteria;p__Pseudomonadota;c__Gammaproteobacteria;o__Enterobacterales;f__Enterobacteriaceae;g__Enterobacter;s__Enterobacter hormaechei_A
pre_070623	8468DM2	8468	Bacillota	Bacilli	Lactobacillales	Streptococcaceae	Streptococcus	Digested tumour	Streptococcus cristatus	Streptococcus cristatus_J	d__Bacteria;p__Bacillota;c__Bacilli;o__Lactobacillales;f__Streptococcaceae;g__Streptococcus;s__Streptococcus cristatus_J
pre_070623	8468DM3	8468	Bacillota	Bacilli	Lactobacillales	Streptococcaceae	Streptococcus	Digested tumour	Streptococcus BHI	Streptococcus BHI	d__Bacteria;p__Bacillota;c__Bacilli;o__Lactobacillales;f__Streptococcaceae;g__Streptococcus;s__
pre_070623	8468DM31	8468	Bacillota	Bacilli	Lactobacillales	Streptococcaceae	Streptococcus	Digested tumour	Streptococcus BHI	Streptococcus BHI	d__Bacteria;p__Bacillota;c__Bacilli;o__Lactobacillales;f__Streptococcaceae;g__Streptococcus;s__
pre_070623	8468DM5	8468	Bacillota	Negativicutes	Veillonellales	Veillonellaceae	Veillonella	Digested tumour	Veillonella atypica	Veillonella atypica	d__Bacteria;p__Bacillota_C;c__Negativicutes;o__Veillonellales;f__Veillonellaceae;g__Veillonella;s__Veillonella atypica
pre_070623	8468DM6	8468	Bacillota	Negativicutes	Veillonellales	Veillonellaceae	Veillonella	Digested tumour	Veillonella atypica	Veillonella atypica	d__Bacteria;p__Bacillota_C;c__Negativicutes;o__Veillonellales;f__Veillonellaceae;g__Veillonella;s__Veillonella atypica
pre_070623	8468OA4	8468	Bacillota	Bacilli	Lactobacillales	Streptococcaceae	Streptococcus	Oral cavity	Streptococcus rubneri	Streptococcus rubneri	d__Bacteria;p__Bacillota;c__Bacilli;o__Lactobacillales;f__Streptococcaceae;g__Streptococcus;s__Streptococcus rubneri
pre_070623	8468OAN1	8468	Bacillota	Bacilli	Lactobacillales	Streptococcaceae	Streptococcus	Oral cavity	Streptococcus xiaochunlingii	Streptococcus xiaochunlingii	d__Bacteria;p__Bacillota;c__Bacilli;o__Lactobacillales;f__Streptococcaceae;g__Streptococcus;s__Streptococcus xiaochunlingii
pre_070623	8468OAN3	8468	Bacillota	Bacilli	Lactobacillales	Streptococcaceae	Streptococcus	Oral cavity	Streptococcus infantis	Streptococcus infantis_I	d__Bacteria;p__Bacillota;c__Bacilli;o__Lactobacillales;f__Streptococcaceae;g__Streptococcus;s__Streptococcus infantis_I
pre_070623	8484A3	8484	Bacillota	Bacilli	Lactobacillales	Streptococcaceae	Streptococcus	Oral cavity	Streptococcus mitis	Streptococcus mitis_CD	d__Bacteria;p__Bacillota;c__Bacilli;o__Lactobacillales;f__Streptococcaceae;g__Streptococcus;s__Streptococcus mitis_CD
pre_070623	8484A4	8484	Pseudomonadota	Gammaproteobacteria	Burkholderiales	Neisseriaceae	Neisseria	Oral cavity	Neisseria cinerea	Neisseria cinerea	d__Bacteria;p__Pseudomonadota;c__Gammaproteobacteria;o__Burkholderiales;f__Neisseriaceae;g__Neisseria;s__Neisseria cinerea
pre_070623	8484A6	8484	Pseudomonadota	Gammaproteobacteria	Burkholderiales	Neisseriaceae	Neisseria	Oral cavity	Neisseria cinerea	Neisseria cinerea	d__Bacteria;p__Pseudomonadota;c__Gammaproteobacteria;o__Burkholderiales;f__Neisseriaceae;g__Neisseria;s__Neisseria cinerea
pre_070623	8484A8	8484	Bacillota	Bacilli	Lactobacillales	Streptococcaceae	Streptococcus	Oral cavity	Streptococcus mitis	Streptococcus mitis_CD	d__Bacteria;p__Bacillota;c__Bacilli;o__Lactobacillales;f__Streptococcaceae;g__Streptococcus;s__Streptococcus mitis_CD
pre_070623	8484AN1	8484	Pseudomonadota	Gammaproteobacteria	Enterobacterales	Enterobacteriaceae	Enterobacter	Oral cavity	Enterobacter hormaechei	Enterobacter hormaechei_A	d__Bacteria;p__Pseudomonadota;c__Gammaproteobacteria;o__Enterobacterales;f__Enterobacteriaceae;g__Enterobacter;s__Enterobacter hormaechei_A
pre_070623	8484AN2	8484	Pseudomonadota	Gammaproteobacteria	Enterobacterales	Enterobacteriaceae	Enterobacter	Oral cavity	Enterobacter hormaechei	Enterobacter hormaechei_A	d__Bacteria;p__Pseudomonadota;c__Gammaproteobacteria;o__Enterobacterales;f__Enterobacteriaceae;g__Enterobacter;s__Enterobacter hormaechei_A
pre_070623	8484AN9	8484	Bacillota	Bacilli	Staphylococcales	Staphylococcaceae	Staphylococcus	Oral cavity	Staphylococcus epidermidis	Staphylococcus epidermidis	d__Bacteria;p__Bacillota;c__Bacilli;o__Staphylococcales;f__Staphylococcaceae;g__Staphylococcus;s__Staphylococcus epidermidis
pre_070623	8485A1	8485	Bacillota	Bacilli	Staphylococcales	Staphylococcaceae	Staphylococcus	Oral cavity	Staphylococcus capitis	Staphylococcus capitis	d__Bacteria;p__Bacillota;c__Bacilli;o__Staphylococcales;f__Staphylococcaceae;g__Staphylococcus;s__Staphylococcus capitis
pre_070623	8485A2	8485	Bacillota	Bacilli	Lactobacillales	Streptococcaceae	Streptococcus	Oral cavity	Streptococcus BHI	Streptococcus BHI	d__Bacteria;p__Bacillota;c__Bacilli;o__Lactobacillales;f__Streptococcaceae;g__Streptococcus;s__
pre_070623	8485A3	8485	Bacillota	Bacilli	Staphylococcales	Staphylococcaceae	Staphylococcus	Oral cavity	Staphylococcus epidermidis	Staphylococcus epidermidis	d__Bacteria;p__Bacillota;c__Bacilli;o__Staphylococcales;f__Staphylococcaceae;g__Staphylococcus;s__Staphylococcus epidermidis
pre_070623	8485A4	8485	Actinomycetota	Actinomycetia	Actinomycetales	Micrococcaceae	Rothia	Oral cavity	Rothia mucilaginosa	Rothia mucilaginosa_A	d__Bacteria;p__Actinomycetota;c__Actinomycetia;o__Actinomycetales;f__Micrococcaceae;g__Rothia;s__Rothia mucilaginosa_A
pre_070623	8485A5	8485	Bacillota	Bacilli	Staphylococcales	Staphylococcaceae	Staphylococcus	Oral cavity	Staphylococcus epidermidis	Staphylococcus epidermidis	d__Bacteria;p__Bacillota;c__Bacilli;o__Staphylococcales;f__Staphylococcaceae;g__Staphylococcus;s__Staphylococcus epidermidis
pre_070623	8485AN1	8485	Bacillota	Bacilli	Lactobacillales	Streptococcaceae	Streptococcus	Oral cavity	Streptococcus hominis	Streptococcus hominis	d__Bacteria;p__Bacillota;c__Bacilli;o__Lactobacillales;f__Streptococcaceae;g__Streptococcus;s__Streptococcus hominis
pre_070623	8485AN10	8485	Bacillota	Bacilli	Lactobacillales	Streptococcaceae	Streptococcus	Oral cavity	Streptococcus hominis	Streptococcus hominis	d__Bacteria;p__Bacillota;c__Bacilli;o__Lactobacillales;f__Streptococcaceae;g__Streptococcus;s__Streptococcus hominis
pre_070623	8485AN4	8485	Bacillota	Bacilli	Lactobacillales	Streptococcaceae	Streptococcus	Oral cavity	Streptococcus sp	Streptococcus sp901875575	d__Bacteria;p__Bacillota;c__Bacilli;o__Lactobacillales;f__Streptococcaceae;g__Streptococcus;s__Streptococcus sp901875575
pre_070623	8485AN5	8485	Pseudomonadota	Gammaproteobacteria	Enterobacterales	Enterobacteriaceae	Enterobacter	Oral cavity	Enterobacter hormaechei	Enterobacter hormaechei_A	d__Bacteria;p__Pseudomonadota;c__Gammaproteobacteria;o__Enterobacterales;f__Enterobacteriaceae;g__Enterobacter;s__Enterobacter hormaechei_A
pre_070623	8485AN6	8485	Pseudomonadota	Gammaproteobacteria	Enterobacterales	Enterobacteriaceae	Enterobacter	Oral cavity	Enterobacter hormaechei	Enterobacter hormaechei_A	d__Bacteria;p__Pseudomonadota;c__Gammaproteobacteria;o__Enterobacterales;f__Enterobacteriaceae;g__Enterobacter;s__Enterobacter hormaechei_A
pre_070623	8485DM1	8485	Pseudomonadota	Gammaproteobacteria	Enterobacterales	Enterobacteriaceae	Enterobacter	Digested tumour	Enterobacter hormaechei	Enterobacter hormaechei_A	d__Bacteria;p__Pseudomonadota;c__Gammaproteobacteria;o__Enterobacterales;f__Enterobacteriaceae;g__Enterobacter;s__Enterobacter hormaechei_A
pre_070623	8485DM2	8485	Pseudomonadota	Gammaproteobacteria	Enterobacterales	Enterobacteriaceae	Enterobacter	Digested tumour	Enterobacter hormaechei	Enterobacter hormaechei_A	d__Bacteria;p__Pseudomonadota;c__Gammaproteobacteria;o__Enterobacterales;f__Enterobacteriaceae;g__Enterobacter;s__Enterobacter hormaechei_A
pre_070623	8485DM3	8485	Bacillota	Bacilli	Lactobacillales	Streptococcaceae	Streptococcus	Digested tumour	Streptococcus parasanguinis	Streptococcus parasanguinis_I	d__Bacteria;p__Bacillota;c__Bacilli;o__Lactobacillales;f__Streptococcaceae;g__Streptococcus;s__Streptococcus parasanguinis_I
pre_070623	8485DM4	8485	Bacillota	Bacilli	Lactobacillales	Streptococcaceae	Streptococcus	Digested tumour	Streptococcus parasanguinis	Streptococcus parasanguinis_I	d__Bacteria;p__Bacillota;c__Bacilli;o__Lactobacillales;f__Streptococcaceae;g__Streptococcus;s__Streptococcus parasanguinis_I
pre_070623	8485DM5	8485	Pseudomonadota	Gammaproteobacteria	Enterobacterales	Enterobacteriaceae	Enterobacter	Digested tumour	Enterobacter hormaechei	Enterobacter hormaechei_A	d__Bacteria;p__Pseudomonadota;c__Gammaproteobacteria;o__Enterobacterales;f__Enterobacteriaceae;g__Enterobacter;s__Enterobacter hormaechei_A
pre_070623	8485DM6	8485	Pseudomonadota	Gammaproteobacteria	Enterobacterales	Enterobacteriaceae	Enterobacter	Digested tumour	Enterobacter hormaechei	Enterobacter hormaechei_A	d__Bacteria;p__Pseudomonadota;c__Gammaproteobacteria;o__Enterobacterales;f__Enterobacteriaceae;g__Enterobacter;s__Enterobacter hormaechei_B
pre_070623	8494AN1	8494	Bacillota	Negativicutes	Veillonellales	Veillonellaceae	Veillonella	Oral cavity	Veillonella denticariosi	Veillonella denticariosi	d__Bacteria;p__Bacillota_C;c__Negativicutes;o__Veillonellales;f__Veillonellaceae;g__Veillonella;s__Veillonella denticariosi
after_070623	8494AN11	8494	Bacillota	Negativicutes	Veillonellales	Veillonellaceae	Veillonella	Oral cavity	Veillonella parvula	Veillonella parvula_A	d__Bacteria;p__Bacillota_C;c__Negativicutes;o__Veillonellales;f__Veillonellaceae;g__Veillonella;s__Veillonella parvula_A
after_070623	8494AN12	8494	Fusobacteriota	Fusobacteriia	Fusobacteriales	Fusobacteriaceae	Fusobacterium	Oral cavity	Fusobacterium periodonticum	Fusobacterium periodonticum_D	d__Bacteria;p__Fusobacteriota;c__Fusobacteriia;o__Fusobacteriales;f__Fusobacteriaceae;g__Fusobacterium;s__Fusobacterium periodonticum_D
after_070623	8494AN3	8494	Bacillota	Negativicutes	Veillonellales	Veillonellaceae	Veillonella	Oral cavity	Veillonella parvula	Veillonella parvula_A	d__Bacteria;p__Bacillota_C;c__Negativicutes;o__Veillonellales;f__Veillonellaceae;g__Veillonella;s__Veillonella parvula_A
after_070623	8494AN4	8494	Bacillota	Negativicutes	Veillonellales	Veillonellaceae	Veillonella	Oral cavity	Veillonella nakazawae	Veillonella nakazawae	d__Bacteria;p__Bacillota_C;c__Negativicutes;o__Veillonellales;f__Veillonellaceae;g__Veillonella;s__Veillonella nakazawae
after_070623	8494AN8	8494	Bacillota	Negativicutes	Veillonellales	Veillonellaceae	Veillonella	Oral cavity	Veillonella parvula	Veillonella parvula_A	d__Bacteria;p__Bacillota_C;c__Negativicutes;o__Veillonellales;f__Veillonellaceae;g__Veillonella;s__Veillonella parvula_A
after_070623	8494DM1	8494	Bacillota	Bacilli	Lactobacillales	Streptococcaceae	Streptococcus	Digested tumour	Streptococcus xiaochunlingii	Streptococcus xiaochunlingii	d__Bacteria;p__Bacillota;c__Bacilli;o__Lactobacillales;f__Streptococcaceae;g__Streptococcus;s__Streptococcus xiaochunlingii
after_070623	8494DM3	8494	Bacillota	Negativicutes	Veillonellales	Veillonellaceae	Veillonella	Digested tumour	Veillonella parvula	Veillonella parvula_A	d__Bacteria;p__Bacillota_C;c__Negativicutes;o__Veillonellales;f__Veillonellaceae;g__Veillonella;s__Veillonella parvula_A
after_070623	8494DM5	8494	Bacillota	Bacilli	Lactobacillales	Streptococcaceae	Streptococcus	Digested tumour	Streptococcus parasanguinis	Streptococcus parasanguinis_E	d__Bacteria;p__Bacillota;c__Bacilli;o__Lactobacillales;f__Streptococcaceae;g__Streptococcus;s__Streptococcus parasanguinis_E
after_070623	8494DM6	8494	Bacillota	Bacilli	Lactobacillales	Streptococcaceae	Streptococcus	Digested tumour	Streptococcus mitis	Streptococcus mitis	d__Bacteria;p__Bacillota;c__Bacilli;o__Lactobacillales;f__Streptococcaceae;g__Streptococcus;s__Streptococcus mitis
after_070623	8496OA5	8496	Actinomycetota	Actinomycetia	Actinomycetales	Micrococcaceae	Rothia	Oral cavity	Rothia dentocariosa	Rothia dentocariosa	d__Bacteria;p__Actinomycetota;c__Actinomycetia;o__Actinomycetales;f__Micrococcaceae;g__Rothia;s__Rothia dentocariosa
after_070623	8497AN2.2	8497	Pseudomonadota	Gammaproteobacteria	Burkholderiales	Neisseriaceae	Eikenella	Oral cavity	Neisseria	Neisseria	d__Bacteria;p__Pseudomonadota;c__Gammaproteobacteria;o__Burkholderiales;f__Neisseriaceae;g__Eikenella;s__
after_070623	8497AN4	8497	Bacillota	Bacilli	Lactobacillales	Streptococcaceae	Streptococcus	Oral cavity	Streptococcus mitis	Streptococcus mitis_CY	d__Bacteria;p__Bacillota;c__Bacilli;o__Lactobacillales;f__Streptococcaceae;g__Streptococcus;s__Streptococcus mitis_CY
after_070623	8497AN5	8497	Fusobacteriota	Fusobacteriia	Fusobacteriales	Fusobacteriaceae	Fusobacterium	Oral cavity	Fusobacterium hwasookii	Fusobacterium hwasookii	d__Bacteria;p__Fusobacteriota;c__Fusobacteriia;o__Fusobacteriales;f__Fusobacteriaceae;g__Fusobacterium;s__Fusobacterium hwasookii
after_070623	8497AN6.1	8497	Pseudomonadota	Gammaproteobacteria	Burkholderiales	Neisseriaceae	Eikenella	Oral cavity	Neisseria	Neisseria	d__Bacteria;p__Pseudomonadota;c__Gammaproteobacteria;o__Burkholderiales;f__Neisseriaceae;g__Eikenella;s__
after_070623	8497AN7	8497	Bacillota	Negativicutes	Veillonellales	Veillonellaceae	Veillonella	Oral cavity	Veillonella parvula	Veillonella parvula	d__Bacteria;p__Bacillota_C;c__Negativicutes;o__Veillonellales;f__Veillonellaceae;g__Veillonella;s__Veillonella parvula
after_070623	8497AN8	8497	Fusobacteriota	Fusobacteriia	Fusobacteriales	Fusobacteriaceae	Fusobacterium	Oral cavity	Fusobacterium nucleatum	Fusobacterium nucleatum	d__Bacteria;p__Fusobacteriota;c__Fusobacteriia;o__Fusobacteriales;f__Fusobacteriaceae;g__Fusobacterium;s__Fusobacterium nucleatum
after_070623	8497OA1	8497	Pseudomonadota	Gammaproteobacteria	Burkholderiales	Neisseriaceae	Neisseria	Oral cavity	Neisseria sicca	Neisseria sicca_B	d__Bacteria;p__Pseudomonadota;c__Gammaproteobacteria;o__Burkholderiales;f__Neisseriaceae;g__Neisseria;s__Neisseria sicca_B
after_070623	8497OA7	8497	Bacillota	Bacilli	Lactobacillales	Streptococcaceae	Streptococcus	Oral cavity	Streptococcus salivarius	Streptococcus salivarius_D	d__Bacteria;p__Bacillota;c__Bacilli;o__Lactobacillales;f__Streptococcaceae;g__Streptococcus;s__Streptococcus salivarius_D
after_070623	8497OA8	8497	Bacillota	Bacilli	Lactobacillales	Streptococcaceae	Streptococcus	Oral cavity	Streptococcus parasanguinis	Streptococcus parasanguinis_D	d__Bacteria;p__Bacillota;c__Bacilli;o__Lactobacillales;f__Streptococcaceae;g__Streptococcus;s__Streptococcus parasanguinis_D
after_070623	8498AN13	8498	Pseudomonadota	Gammaproteobacteria	Enterobacterales	Enterobacteriaceae	Enterobacter	Oral cavity	Enterobacter hormaechei	Enterobacter hormaechei_A	d__Bacteria;p__Pseudomonadota;c__Gammaproteobacteria;o__Enterobacterales;f__Enterobacteriaceae;g__Enterobacter;s__Enterobacter hormaechei_B
after_070623	8498AN14.3	8498	Bacillota	Bacilli	Lactobacillales	Streptococcaceae	Streptococcus	Oral cavity	Streptococcus mitis	Streptococcus mitis_CY	d__Bacteria;p__Bacillota;c__Bacilli;o__Lactobacillales;f__Streptococcaceae;g__Streptococcus;s__Streptococcus mitis_CY
after_070623	8498AN8	8498	Bacillota	Bacilli	Lactobacillales	Streptococcaceae	Streptococcus	Oral cavity	Streptococcus massiliensis	Streptococcus massiliensis	d__Bacteria;p__Bacillota;c__Bacilli;o__Lactobacillales;f__Streptococcaceae;g__Streptococcus;s__Streptococcus massiliensis
after_070623	8498DM2	8498	Bacillota	Bacilli	Staphylococcales	Gemellaceae	Gemella	Digested tumour	Gemella	Gemella	d__Bacteria;p__Bacillota;c__Bacilli;o__Staphylococcales;f__Gemellaceae;g__Gemella;s__Gemella sp002871655
after_070623	8498DM3	8498	Bacillota	Bacilli	Lactobacillales	Streptococcaceae	Streptococcus	Digested tumour	Streptococcus massiliensis	Streptococcus massiliensis	d__Bacteria;p__Bacillota;c__Bacilli;o__Lactobacillales;f__Streptococcaceae;g__Streptococcus;s__Streptococcus massiliensis
after_070623	8498DM4	8498	Bacillota	Bacilli	Lactobacillales	Streptococcaceae	Streptococcus	Digested tumour	Streptococcus massiliensis	Streptococcus massiliensis	d__Bacteria;p__Bacillota;c__Bacilli;o__Lactobacillales;f__Streptococcaceae;g__Streptococcus;s__Streptococcus massiliensis
after_070623	8498OA8	8498	Bacillota	Bacilli	Lactobacillales	Streptococcaceae	Streptococcus	Oral cavity	Streptococcus constellatus	Streptococcus constellatus	d__Bacteria;p__Bacillota;c__Bacilli;o__Lactobacillales;f__Streptococcaceae;g__Streptococcus;s__Streptococcus constellatus
after_070623	8498OA9	8498	Bacillota	Bacilli	Lactobacillales	Streptococcaceae	Streptococcus	Oral cavity	Streptococcus oralis	Streptococcus oralis_C	d__Bacteria;p__Bacillota;c__Bacilli;o__Lactobacillales;f__Streptococcaceae;g__Streptococcus;s__Streptococcus oralis_C
after_070623	8507AN13	8507	Bacillota	Bacilli	Lactobacillales	Streptococcaceae	Streptococcus	Oral cavity	Streptococcus BHI	Streptococcus BHI	d__Bacteria;p__Bacillota;c__Bacilli;o__Lactobacillales;f__Streptococcaceae;g__Streptococcus;s__
after_070623	8507AN2.2	8507	Bacillota	Negativicutes	Veillonellales	Veillonellaceae	Veillonella	Oral cavity	Veillonella dispar	Veillonella dispar	d__Bacteria;p__Bacillota_C;c__Negativicutes;o__Veillonellales;f__Veillonellaceae;g__Veillonella;s__Veillonella dispar
after_070623	8507AN4.1	8507	Bacillota	Bacilli	Lactobacillales	Streptococcaceae	Streptococcus	Oral cavity	Streptococcus BHI	Streptococcus BHI	d__Bacteria;p__Bacillota;c__Bacilli;o__Lactobacillales;f__Streptococcaceae;g__Streptococcus;s__
after_070623	8507AN4.2	8507	Bacillota	Bacilli	Lactobacillales	Streptococcaceae	Streptococcus	Oral cavity	Streptococcus BHI	Streptococcus BHI	d__Bacteria;p__Bacillota;c__Bacilli;o__Lactobacillales;f__Streptococcaceae;g__Streptococcus;s__
after_070623	8507AN6.1	8507	Bacillota	Bacilli	Lactobacillales	Aerococcaceae	Granulicatella	Oral cavity	Granulicatella sp	Granulicatella sp916049935	d__Bacteria;p__Bacillota;c__Bacilli;o__Lactobacillales;f__Aerococcaceae;g__Granulicatella;s__Granulicatella sp916049935
after_070623	8507AN7	8507	Bacillota	Bacilli	Lactobacillales	Streptococcaceae	Streptococcus	Oral cavity	Streptococcus infantis	Streptococcus infantis_H	d__Bacteria;p__Bacillota;c__Bacilli;o__Lactobacillales;f__Streptococcaceae;g__Streptococcus;s__Streptococcus infantis_H
after_070623	8507K1	8507	Pseudomonadota	Gammaproteobacteria	Enterobacteriaceae	Enterobacterales	Enterobacter	Oral cavity	Enterobacter hormaechei	Enterobacter hormaechei_B	d__Bacteria;p__Pseudomonadota;c__Gammaproteobacteria;o__Enterobacterales;f__Enterobacteriaceae;g__Enterobacter;s__Enterobacter hormaechei_B
after_070623	8507K2	8507	Bacillota	Bacilli	Lactobacillales	Streptococcaceae	Streptococcus	Oral cavity	Streptococcus anginosus	Streptococcus anginosus	d__Bacteria;p__Bacillota;c__Bacilli;o__Lactobacillales;f__Streptococcaceae;g__Streptococcus;s__Streptococcus anginosus
after_070623	8507K3	8507	Bacillota	Bacilli	Lactobacillales	Streptococcaceae	Streptococcus	Oral cavity	Streptococcus anginosus	Streptococcus anginosus	d__Bacteria;p__Bacillota;c__Bacilli;o__Lactobacillales;f__Streptococcaceae;g__Streptococcus;s__Streptococcus anginosus
after_070623	8507OA1	8507	Actinomycetota	Actinomycetia	Actinomycetales	Micrococcaceae	Rothia	Oral cavity	Rothia	Rothia	d__Bacteria;p__Actinomycetota;c__Actinomycetia;o__Actinomycetales;f__Micrococcaceae;g__Rothia;s__
after_070623	8507OA3	8507	Actinomycetota	Actinomycetia	Actinomycetales	Micrococcaceae	Rothia	Oral cavity	Rothia dentocariosa	Rothia dentocariosa	d__Bacteria;p__Actinomycetota;c__Actinomycetia;o__Actinomycetales;f__Micrococcaceae;g__Rothia;s__Rothia dentocariosa
after_070623	8507OA5	8507	Bacillota	Bacilli	Lactobacillales	Streptococcaceae	Streptococcus	Oral cavity	Streptococcus BHI	Streptococcus BHI	d__Bacteria;p__Bacillota;c__Bacilli;o__Lactobacillales;f__Streptococcaceae;g__Streptococcus;s__Streptococcus sp001813105
after_070623	8507OA7	8507	Pseudomonadota	Gammaproteobacteria	Burkholderiales	Neisseriaceae	Neisseria	Oral cavity	Neisseria mucosa	Neisseria mucosa_A	d__Bacteria;p__Pseudomonadota;c__Gammaproteobacteria;o__Burkholderiales;f__Neisseriaceae;g__Neisseria;s__Neisseria mucosa_A
after_070623	8507OAN12	8507	Bacillota	Bacilli	Veillonellales	Streptococcaceae	Streptococcus	Oral cavity	Streptococcus BHI	Streptococcus BHI	d__Bacteria;p__Bacillota;c__Bacilli;o__Lactobacillales;f__Streptococcaceae;g__Streptococcus;s__
after_070623	8511A1	8511	Bacillota	Bacilli	Lactobacillales	Streptococcaceae	Streptococcus	Oral cavity	Streptococcus BHI	Streptococcus BHI	d__Bacteria;p__Bacillota;c__Bacilli;o__Lactobacillales;f__Streptococcaceae;g__Streptococcus;s__
after_070623	8511A2	8511	Pseudomonadota	Gammaproteobacteria	Burkholderiales	Neisseriaceae	Neisseria	Oral cavity	Neisseria sp	Neisseria sp000186165	d__Bacteria;p__Pseudomonadota;c__Gammaproteobacteria;o__Burkholderiales;f__Neisseriaceae;g__Neisseria;s__Neisseria sp000186165
after_070623	8511A3	8511	Bacillota	Bacilli	Lactobacillales	Streptococcaceae	Streptococcus	Oral cavity	Streptococcus salivarius	Streptococcus salivarius_D	d__Bacteria;p__Bacillota;c__Bacilli;o__Lactobacillales;f__Streptococcaceae;g__Streptococcus;s__Streptococcus salivarius_D
after_070623	8511A4	8511	Pseudomonadota	Gammaproteobacteria	Burkholderiales	Neisseriaceae	Neisseria	Oral cavity	Neisseria sp	Neisseria sp000090875	d__Bacteria;p__Pseudomonadota;c__Gammaproteobacteria;o__Burkholderiales;f__Neisseriaceae;g__Neisseria;s__Neisseria sp000090875
after_070623	8511A7	8511	Bacillota	Bacilli	Lactobacillales	Streptococcaceae	Streptococcus	Oral cavity	Streptococcus parasanguinis	Streptococcus parasanguinis	d__Bacteria;p__Bacillota;c__Bacilli;o__Lactobacillales;f__Streptococcaceae;g__Streptococcus;s__Streptococcus parasanguinis
after_070623	8511A8	8511	Bacillota	Bacilli	Lactobacillales	Streptococcaceae	Streptococcus	Oral cavity	Streptococcus oralis	Streptococcus oralis_BY	d__Bacteria;p__Bacillota;c__Bacilli;o__Lactobacillales;f__Streptococcaceae;g__Streptococcus;s__Streptococcus oralis_BY
after_070623	8511AK2	8511	Pseudomonadota	Gammaproteobacteria	Enterobacterales	Enterobacteriaceae	Klebsiella	Oral cavity	Klebsiella grimontii	Klebsiella grimontii	d__Bacteria;p__Pseudomonadota;c__Gammaproteobacteria;o__Enterobacterales;f__Enterobacteriaceae;g__Klebsiella;s__Klebsiella grimontii
after_070623	8511AN1	8511	Bacillota	Bacilli	Lactobacillales	Streptococcaceae	Streptococcus	Oral cavity	Streptococcus anginosus	Streptococcus anginosus	d__Bacteria;p__Bacillota;c__Bacilli;o__Lactobacillales;f__Streptococcaceae;g__Streptococcus;s__Streptococcus anginosus
after_070623	8511AN11	8511	Bacillota	Bacilli	Lactobacillales	Streptococcaceae	Streptococcus	Oral cavity	Streptococcus anginosus	Streptococcus anginosus	d__Bacteria;p__Bacillota;c__Bacilli;o__Lactobacillales;f__Streptococcaceae;g__Streptococcus;s__Streptococcus anginosus
after_070623	8511AN14	8511	Bacillota	Clostridia	Lachnospirales	Lachnospiraceae	Lachnoanaerobaculum	Oral cavity	Lachnoanaerobaculum	Lachnoanaerobaculum	d__Bacteria;p__Bacillota_A;c__Clostridia;o__Lachnospirales;f__Lachnospiraceae;g__Lachnoanaerobaculum;s__
after_070623	8511AN3	8511	Bacillota	Bacilli	Lactobacillales	Streptococcaceae	Streptococcus	Oral cavity	Streptococcus hominis	Streptococcus hominis	d__Bacteria;p__Bacillota;c__Bacilli;o__Lactobacillales;f__Streptococcaceae;g__Streptococcus;s__Streptococcus hominis
after_070623	8511AN4	8511	Bacillota	Bacilli	Lactobacillales	Streptococcaceae	Streptococcus	Oral cavity	Streptococcus hominis	Streptococcus hominis	d__Bacteria;p__Bacillota;c__Bacilli;o__Lactobacillales;f__Streptococcaceae;g__Streptococcus;s__Streptococcus hominis
after_070623	8511AN5	8511	Pseudomonadota	Gammaproteobacteria	Enterobacterales	Enterobacteriaceae	Enterobacter	Oral cavity	Enterobacter roggenkampii	Enterobacter roggenkampii	d__Bacteria;p__Pseudomonadota;c__Gammaproteobacteria;o__Enterobacterales;f__Enterobacteriaceae;g__Enterobacter;s__Enterobacter roggenkampii
after_070623	8511AN6	8511	Fusobacteriota	Fusobacteriia	Fusobacteriales	Fusobacteriaceae	Fusobacterium	Oral cavity	Fusobacterium polymorphum	Fusobacterium polymorphum	d__Bacteria;p__Fusobacteriota;c__Fusobacteriia;o__Fusobacteriales;f__Fusobacteriaceae;g__Fusobacterium;s__Fusobacterium polymorphum
after_070623	8511AN7	8511	Bacillota	Bacilli	Lactobacillales	Streptococcaceae	Streptococcus	Oral cavity	Streptococcus hominis	Streptococcus hominis	d__Bacteria;p__Bacillota;c__Bacilli;o__Lactobacillales;f__Streptococcaceae;g__Streptococcus;s__Streptococcus hominis
after_070623	8511AN8	8511	Bacillota	Bacilli	Lactobacillales	Streptococcaceae	Streptococcus	Oral cavity	Streptococcus gordonii	Streptococcus gordonii	d__Bacteria;p__Bacillota;c__Bacilli;o__Lactobacillales;f__Streptococcaceae;g__Streptococcus;s__Streptococcus gordonii
after_070623	8511AN9	8511	Bacillota	Clostridia	Lachnospirales	Lachnospiraceae	Lachnoanaerobaculum	Oral cavity	Lachnoanaerobaculum	Lachnoanaerobaculum	d__Bacteria;p__Bacillota_A;c__Clostridia;o__Lachnospirales;f__Lachnospiraceae;g__Lachnoanaerobaculum;s__
after_070623	8511ANK2	8511	Pseudomonadota	Gammaproteobacteria	Enterobacterales	Enterobacteriaceae	Enterobacter	Oral cavity	Enterobacter asburiae	Enterobacter asburiae_B	d__Bacteria;p__Pseudomonadota;c__Gammaproteobacteria;o__Enterobacterales;f__Enterobacteriaceae;g__Enterobacter;s__Enterobacter asburiae_B
after_070623	8511AS2	8511	Bacillota	Bacilli	Staphylococcales	Staphylococcaceae	Staphylococcus	Oral cavity	Staphylococcus epidermidis	Staphylococcus epidermidis	d__Bacteria;p__Bacillota;c__Bacilli;o__Staphylococcales;f__Staphylococcaceae;g__Staphylococcus;s__Staphylococcus epidermidis
after_070623	8511AS4	8511	Bacillota	Bacilli	Staphylococcales	Staphylococcaceae	Staphylococcus	Oral cavity	Staphylococcus epidermidis	Staphylococcus epidermidis	d__Bacteria;p__Bacillota;c__Bacilli;o__Staphylococcales;f__Staphylococcaceae;g__Staphylococcus;s__Staphylococcus epidermidis
after_070623	8512A1	8512	Actinomycetota	Actinomycetia	Actinomycetales	Micrococcaceae	Rothia	Oral cavity	Rothia dentocariosa	Rothia dentocariosa	d__Bacteria;p__Actinomycetota;c__Actinomycetia;o__Actinomycetales;f__Micrococcaceae;g__Rothia;s__Rothia dentocariosa
after_070623	8512A2	8512	Bacillota	Bacilli	Staphylococcales	Staphylococcaceae	Staphylococcus	Oral cavity	Staphylococcus epidermidis	Staphylococcus epidermidis	d__Bacteria;p__Bacillota;c__Bacilli;o__Staphylococcales;f__Staphylococcaceae;g__Staphylococcus;s__Staphylococcus epidermidis
after_070623	8512A3	8512	Actinomycetota	Actinomycetia	Actinomycetales	Micrococcaceae	Rothia	Oral cavity	Rothia	Rothia	d__Bacteria;p__Actinomycetota;c__Actinomycetia;o__Actinomycetales;f__Micrococcaceae;g__Rothia;s__
after_070623	8512A4	8512	Actinomycetota	Actinomycetia	Actinomycetales	Micrococcaceae	Rothia	Oral cavity	Rothia dentocariosa	Rothia dentocariosa	d__Bacteria;p__Actinomycetota;c__Actinomycetia;o__Actinomycetales;f__Micrococcaceae;g__Rothia;s__Rothia dentocariosa
after_070623	8512A6	8512	Bacillota	Bacilli	Lactobacillales	Streptococcaceae	Streptococcus	Oral cavity	Streptococcus parasanguinis	Streptococcus parasanguinis_F	d__Bacteria;p__Bacillota;c__Bacilli;o__Lactobacillales;f__Streptococcaceae;g__Streptococcus;s__Streptococcus parasanguinis_F
after_070623	8512A6.1	8512	Bacillota	Bacilli	Lactobacillales	Streptococcaceae	Streptococcus	Oral cavity	Streptococcus parasanguinis	Streptococcus parasanguinis_F	d__Bacteria;p__Bacillota;c__Bacilli;o__Lactobacillales;f__Streptococcaceae;g__Streptococcus;s__Streptococcus parasanguinis_F
after_070623	8512A6.2	8512	Bacillota	Bacilli	Lactobacillales	Streptococcaceae	Streptococcus	Oral cavity	Streptococcus parasanguinis	Streptococcus parasanguinis_F	d__Bacteria;p__Bacillota;c__Bacilli;o__Lactobacillales;f__Streptococcaceae;g__Streptococcus;s__Streptococcus parasanguinis_F
after_070623	8512A7	8512	Actinomycetota	Actinomycetia	Actinomycetales	Micrococcaceae	Rothia	Oral cavity	Rothia dentocariosa	Rothia dentocariosa	d__Bacteria;p__Actinomycetota;c__Actinomycetia;o__Actinomycetales;f__Micrococcaceae;g__Rothia;s__Rothia dentocariosa
after_070623	8512A8	8512	Bacillota	Bacilli	Lactobacillales	Streptococcaceae	Streptococcus	Oral cavity	Streptococcus mitis	Streptococcus mitis_BX	d__Bacteria;p__Bacillota;c__Bacilli;o__Lactobacillales;f__Streptococcaceae;g__Streptococcus;s__Streptococcus mitis_BX
	8512AN1	8512	Fusobacteriota	Fusobacteriia	Fusobacteriales	Fusobacteriaceae	Fusobacterium	Oral cavity	Fusobacterium	Fusobacterium	d__Bacteria;p__Fusobacteriota;c__Fusobacteriia;o__Fusobacteriales;f__Fusobacteriaceae;g__Fusobacterium;s__
after_070623	8512AN10	8512	Bacillota	Bacilli	Lactobacillales	Streptococcaceae	Streptococcus	Digested tumour	Streptococcus anginosus	Streptococcus anginosus	d__Bacteria;p__Bacillota;c__Bacilli;o__Lactobacillales;f__Streptococcaceae;g__Streptococcus;s__Streptococcus anginosus
after_070623	8512AN2	8512	Bacillota	Bacilli	Lactobacillales	Streptococcaceae	Streptococcus	Digested tumour	Streptococcus anginosus	Streptococcus anginosus	d__Bacteria;p__Bacillota;c__Bacilli;o__Lactobacillales;f__Streptococcaceae;g__Streptococcus;s__Streptococcus anginosus
after_070623	8512AN3	8512	Bacillota	Bacilli	Lactobacillales	Streptococcaceae	Streptococcus	Oral cavity	Streptococcus anginosus	Streptococcus anginosus	d__Bacteria;p__Bacillota;c__Bacilli;o__Lactobacillales;f__Streptococcaceae;g__Streptococcus;s__Streptococcus anginosus
after_070623	8512AN4	8512	Bacillota	Bacilli	Lactobacillales	Streptococcaceae	Streptococcus	Oral cavity	Streptococcus anginosus	Streptococcus anginosus	d__Bacteria;p__Bacillota;c__Bacilli;o__Lactobacillales;f__Streptococcaceae;g__Streptococcus;s__Streptococcus anginosus
after_070623	8512AN5	8512	Bacillota	Negativicutes	Veillonellales	Veillonellaceae	Veillonella	Oral cavity	Veillonella atypica	Veillonella atypica	d__Bacteria;p__Bacillota_C;c__Negativicutes;o__Veillonellales;f__Veillonellaceae;g__Veillonella;s__Veillonella atypica
after_070623	8512AN6	8512	Bacillota	Clostridia	Lachnospirales	Lachnospiraceae	Lachnoanaerobaculum	Oral cavity	Lachnoanaerobaculum orale	Lachnoanaerobaculum orale	d__Bacteria;p__Bacillota_A;c__Clostridia;o__Lachnospirales;f__Lachnospiraceae;g__Lachnoanaerobaculum;s__Lachnoanaerobaculum orale
after_070623	8512AN8	8512	Bacillota	Negativicutes	Veillonellales	Veillonellaceae	Veillonella	Oral cavity	Veillonella atypica	Veillonella atypica	d__Bacteria;p__Bacillota_C;c__Negativicutes;o__Veillonellales;f__Veillonellaceae;g__Veillonella;s__Veillonella atypica
after_070623	8512DM1	8512	Bacillota	Bacilli	Lactobacillales	Streptococcaceae	Streptococcus	Digested tumour	Streptococcus anginosus	Streptococcus anginosus	d__Bacteria;p__Bacillota;c__Bacilli;o__Lactobacillales;f__Streptococcaceae;g__Streptococcus;s__Streptococcus anginosus
after_070623	8512DM2	8512	Bacteroidota	Bacteroidia	Bacteroidales	Bacteroidaceae	Bacteroides	Digested tumour	Bacteroides fragilis	Bacteroides fragilis	d__Bacteria;p__Bacteroidota;c__Bacteroidia;o__Bacteroidales;f__Bacteroidaceae;g__Bacteroides;s__Bacteroides fragilis
after_070623	8512DM4	8512	Bacillota	Negativicutes	Veillonellales	Veillonellaceae	Veillonella	Digested tumour	Veillonella atypica	Veillonella atypica	d__Bacteria;p__Bacillota_C;c__Negativicutes;o__Veillonellales;f__Veillonellaceae;g__Veillonella;s__Veillonella atypica
after_070623	8512DM5	8512	Bacillota	Bacilli	Lactobacillales	Enterococcaceae	Enterococcus	Digested tumour	Enterococcus faecalis	Enterococcus faecalis	d__Bacteria;p__Bacillota;c__Bacilli;o__Lactobacillales;f__Enterococcaceae;g__Enterococcus;s__Enterococcus faecalis
after_070623	8512DM6	8512	Bacillota	Bacilli	Staphylococcales	Staphylococcaceae	Staphylococcus	Digested tumour	Staphylococcus epidermidis	Staphylococcus epidermidis	d__Bacteria;p__Bacillota;c__Bacilli;o__Staphylococcales;f__Staphylococcaceae;g__Staphylococcus;s__Staphylococcus epidermidis
after_070623	8512DM7	8512	Bacillota	Negativicutes	Veillonellales	Veillonellaceae	Veillonella	Digested tumour	Veillonella atypica	Veillonella atypica	d__Bacteria;p__Bacillota_C;c__Negativicutes;o__Veillonellales;f__Veillonellaceae;g__Veillonella;s__Veillonella atypica
after_070623	8512K2	8512	Bacillota	Bacilli	Lactobacillales	Enterococcaceae	Enterococcus	Oral cavity	Enterococcus faecalis	Enterococcus faecalis	d__Bacteria;p__Bacillota;c__Bacilli;o__Lactobacillales;f__Enterococcaceae;g__Enterococcus;s__Enterococcus faecalis
after_070623	8512K3	8512	Bacillota	Bacilli	Staphylococcales	Staphylococcaceae	Staphylococcus	Oral cavity	Staphylococcus haemolyticus	Staphylococcus haemolyticus	d__Bacteria;p__Bacillota;c__Bacilli;o__Staphylococcales;f__Staphylococcaceae;g__Staphylococcus;s__Staphylococcus haemolyticus
after_070623	8512K4	8512	Bacillota	Bacilli	Staphylococcales	Staphylococcaceae	Staphylococcus	Oral cavity	Staphylococcus haemolyticus	Staphylococcus haemolyticus	d__Bacteria;p__Bacillota;c__Bacilli;o__Staphylococcales;f__Staphylococcaceae;g__Staphylococcus;s__Staphylococcus haemolyticus
after_070623	8512K6	8512	Bacillota	Bacilli	Lactobacillales	Enterococcaceae	Enterococcus	Oral cavity	Enterococcus faecalis	Enterococcus faecalis	d__Bacteria;p__Bacillota;c__Bacilli;o__Lactobacillales;f__Enterococcaceae;g__Enterococcus;s__Enterococcus faecalis
after_070623	8512K7	8512	Bacillota	Bacilli	Staphylococcales	Staphylococcaceae	Staphylococcus	Oral cavity	Staphylococcus haemolyticus	Staphylococcus haemolyticus	d__Bacteria;p__Bacillota;c__Bacilli;o__Staphylococcales;f__Staphylococcaceae;g__Staphylococcus;s__Staphylococcus haemolyticus
after_070623	8512M1	8512	Bacillota	Bacilli	Lactobacillales	Enterococcaceae	Enterococcus	Oral cavity	Enterococcus faecalis	Enterococcus faecalis	d__Bacteria;p__Bacillota;c__Bacilli;o__Lactobacillales;f__Enterococcaceae;g__Enterococcus;s__Enterococcus faecalis
	8512SHA1	8512	Bacillota	Bacilli	Staphylococcales	Staphylococcaceae	Staphylococcus	Oral cavity	Staphylococcus haemolyticus	Staphylococcus haemolyticus	d__Bacteria;p__Bacillota;c__Bacilli;o__Staphylococcales;f__Staphylococcaceae;g__Staphylococcus;s__Staphylococcus haemolyticus
	8512SHA2	8512	Bacillota	Bacilli	Staphylococcales	Staphylococcaceae	Staphylococcus	Oral cavity	Staphylococcus haemolyticus	Staphylococcus haemolyticus	d__Bacteria;p__Bacillota;c__Bacilli;o__Staphylococcales;f__Staphylococcaceae;g__Staphylococcus;s__Staphylococcus haemolyticus
	8513A10	8513	Bacillota	Bacilli	Lactobacillales	Streptococcaceae	Streptococcus	Oral cavity	Streptococcus gordonii	Streptococcus gordonii	d__Bacteria;p__Bacillota;c__Bacilli;o__Lactobacillales;f__Streptococcaceae;g__Streptococcus;s__Streptococcus gordonii
	8513A11	8513	Bacillota	Bacilli	Lactobacillales	Streptococcaceae	Streptococcus	Oral cavity	Streptococcus BHI	Streptococcus BHI	d__Bacteria;p__Bacillota;c__Bacilli;o__Lactobacillales;f__Streptococcaceae;g__Streptococcus;s__
	8513A12	8513	Bacillota	Bacilli	Lactobacillales	Streptococcaceae	Streptococcus	Digested tumour	Streptococcus constellatus	Streptococcus constellatus	d__Bacteria;p__Bacillota;c__Bacilli;o__Lactobacillales;f__Streptococcaceae;g__Streptococcus;s__Streptococcus constellatus
	8513A2.2	8513	Pseudomonadota	Gammaproteobacteria	Burkholderiales	Neisseriaceae	Neisseria	Oral cavity	Neisseria	Neisseria	d__Bacteria;p__Pseudomonadota;c__Gammaproteobacteria;o__Burkholderiales;f__Neisseriaceae;g__Neisseria;s__
	8513A4	8513	Bacillota	Bacilli	Lactobacillales	Streptococcaceae	Streptococcus	Oral cavity	Streptococcus oralis	Streptococcus oralis_BY	d__Bacteria;p__Bacillota;c__Bacilli;o__Lactobacillales;f__Streptococcaceae;g__Streptococcus;s__Streptococcus oralis_BY
	8513A5.1	8513	Actinomycetota	Actinomycetia	Actinomycetales	Actinomycetaceae	Actinomyces	Oral cavity	Actinomyces oris	Actinomyces oris	d__Bacteria;p__Actinomycetota;c__Actinomycetia;o__Actinomycetales;f__Actinomycetaceae;g__Actinomyces;s__Actinomyces oris
	8513A7	8513	Bacillota	Bacilli	Lactobacillales	Streptococcaceae	Streptococcus	Oral cavity	Streptococcus mutans	Streptococcus mutans	d__Bacteria;p__Bacillota;c__Bacilli;o__Lactobacillales;f__Streptococcaceae;g__Streptococcus;s__Streptococcus mutans
	8513A8.1	8513	Pseudomonadota	Gammaproteobacteria	Burkholderiales	Neisseriaceae	Neisseria	Oral cavity	Neisseria perflava	Neisseria perflava	d__Bacteria;p__Pseudomonadota;c__Gammaproteobacteria;o__Burkholderiales;f__Neisseriaceae;g__Neisseria;s__Neisseria perflava
	8513A9	8513	Bacillota	Bacilli	Lactobacillales	Streptococcaceae	Streptococcus	Oral cavity	Streptococcus mitis	Streptococcus mitis_BZ	d__Bacteria;p__Bacillota;c__Bacilli;o__Lactobacillales;f__Streptococcaceae;g__Streptococcus;s__Streptococcus mitis_BZ
	8513AN10.3	8513	Bacillota	Bacilli	Lactobacillales	Streptococcaceae	Streptococcus	Oral cavity	Streptococcus constellatus	Streptococcus constellatus	d__Bacteria;p__Bacillota;c__Bacilli;o__Lactobacillales;f__Streptococcaceae;g__Streptococcus;s__Streptococcus constellatus
	8513AN2	8513	Bacillota	Negativicutes	Veillonellales	Veillonellaceae	Veillonella	Oral cavity	Veillonella parvula	Veillonella parvula_A	d__Bacteria;p__Bacillota_C;c__Negativicutes;o__Veillonellales;f__Veillonellaceae;g__Veillonella;s__Veillonella parvula_A
	8513AN6	8513	Bacillota	Bacilli	Lactobacillales	Streptococcaceae	Streptococcus	Oral cavity	Streptococcus constellatus	Streptococcus constellatus	d__Bacteria;p__Bacillota;c__Bacilli;o__Lactobacillales;f__Streptococcaceae;g__Streptococcus;s__Streptococcus constellatus
	8513AN9.2	8513	Bacillota	Bacilli	Lactobacillales	Streptococcaceae	Streptococcus	Oral cavity	Streptococcus constellatus	Streptococcus constellatus	d__Bacteria;p__Bacillota;c__Bacilli;o__Lactobacillales;f__Streptococcaceae;g__Streptococcus;s__Streptococcus constellatus
	8513K2	8513	Bacillota	Bacilli	Lactobacillales	Lactobacillaceae	Limosilactobacillus	Oral cavity	Limosilactobacillus fermentum	Limosilactobacillus fermentum	d__Bacteria;p__Bacillota;c__Bacilli;o__Lactobacillales;f__Lactobacillaceae;g__Limosilactobacillus;s__Limosilactobacillus fermentum
	8513K3	8513	Bacillota	Bacilli	Lactobacillales	Lactobacillaceae	Limosilactobacillus	Oral cavity	Limosilactobacillus fermentum	Limosilactobacillus fermentum	d__Bacteria;p__Bacillota;c__Bacilli;o__Lactobacillales;f__Lactobacillaceae;g__Limosilactobacillus;s__Limosilactobacillus fermentum
	8513K5	8513	Bacillota	Bacilli	Lactobacillales	Streptococcaceae	Streptococcus	Oral cavity	Streptococcus anginosus	Streptococcus anginosus	d__Bacteria;p__Bacillota;c__Bacilli;o__Lactobacillales;f__Streptococcaceae;g__Streptococcus;s__Streptococcus anginosus
	8514A1	8514	Bacillota	Bacilli	Staphylococcales	Staphylococcaceae	Staphylococcus	Oral cavity	Staphylococcus hominis	Staphylococcus hominis	d__Bacteria;p__Bacillota;c__Bacilli;o__Staphylococcales;f__Staphylococcaceae;g__Staphylococcus;s__Staphylococcus hominis
	8514A10	8514	Bacillota	Bacilli	Lactobacillales	Streptococcaceae	Streptococcus	Oral cavity	Streptococcus vestibularis	Streptococcus vestibularis	d__Bacteria;p__Bacillota;c__Bacilli;o__Lactobacillales;f__Streptococcaceae;g__Streptococcus;s__Streptococcus vestibularis
	8514A11	8514	Bacillota	Bacilli	Lactobacillales	Streptococcaceae	Streptococcus	Oral cavity	Streptococcus oralis	Streptococcus oralis_BW	d__Bacteria;p__Bacillota;c__Bacilli;o__Lactobacillales;f__Streptococcaceae;g__Streptococcus;s__Streptococcus oralis_BW
	8514A2	8514	Bacillota	Bacilli	Lactobacillales	Streptococcaceae	Streptococcus	Oral cavity	Streptococcus anginosus	Streptococcus anginosus_C	d__Bacteria;p__Bacillota;c__Bacilli;o__Lactobacillales;f__Streptococcaceae;g__Streptococcus;s__Streptococcus anginosus_C
	8514A3	8514	Actinomycetota	Actinomycetia	Actinomycetales	Micrococcaceae	Rothia	Oral cavity	Rothia mucilaginosa	Rothia mucilaginosa_A	d__Bacteria;p__Actinomycetota;c__Actinomycetia;o__Actinomycetales;f__Micrococcaceae;g__Rothia;s__Rothia mucilaginosa_A
	8514A4	8514	Bacillota	Bacilli	Lactobacillales	Streptococcaceae	Streptococcus	Oral cavity	Streptococcus vestibularis	Streptococcus vestibularis	d__Bacteria;p__Bacillota;c__Bacilli;o__Lactobacillales;f__Streptococcaceae;g__Streptococcus;s__Streptococcus vestibularis
	8514A5	8514	Bacillota	Bacilli	Lactobacillales	Streptococcaceae	Streptococcus	Oral cavity	Streptococcus vestibularis	Streptococcus vestibularis	d__Bacteria;p__Bacillota;c__Bacilli;o__Lactobacillales;f__Streptococcaceae;g__Streptococcus;s__Streptococcus vestibularis
	8514A6	8514	Bacillota	Bacilli	Lactobacillales	Streptococcaceae	Streptococcus	Oral cavity	Streptococcus vestibularis	Streptococcus vestibularis	d__Bacteria;p__Bacillota;c__Bacilli;o__Lactobacillales;f__Streptococcaceae;g__Streptococcus;s__Streptococcus vestibularis
	8514A7	8514	Bacillota	Bacilli	Veillonellales	Streptococcaceae	Streptococcus	Oral cavity	Streptococcus caecimuris	Streptococcus caecimuris	d__Bacteria;p__Bacillota;c__Bacilli;o__Lactobacillales;f__Streptococcaceae;g__Streptococcus;s__Streptococcus caecimuris
	8514A8	8514	Bacillota	Bacilli	Lactobacillales	Streptococcaceae	Streptococcus	Oral cavity	Streptococcus parasanguinis	Streptococcus parasanguinis	d__Bacteria;p__Bacillota;c__Bacilli;o__Lactobacillales;f__Streptococcaceae;g__Streptococcus;s__Streptococcus parasanguinis
	8514A9	8514	Bacillota	Bacilli	Lactobacillales	Streptococcaceae	Streptococcus	Oral cavity	Streptococcus parasanguinis	Streptococcus parasanguinis	d__Bacteria;p__Bacillota;c__Bacilli;o__Lactobacillales;f__Streptococcaceae;g__Streptococcus;s__Streptococcus parasanguinis
	8514AN3	8514	Bacillota	Bacilli	Lactobacillales	Streptococcaceae	Streptococcus	Oral cavity	Streptococcus hominis	Streptococcus hominis	d__Bacteria;p__Bacillota;c__Bacilli;o__Lactobacillales;f__Streptococcaceae;g__Streptococcus;s__Streptococcus hominis
	8514AN5.1	8514	Bacillota	Negativicutes	Veillonellales	Veillonellaceae	Veillonella	Oral cavity	Veillonella atypica	Veillonella atypica	d__Bacteria;p__Bacillota_C;c__Negativicutes;o__Veillonellales;f__Veillonellaceae;g__Veillonella;s__Veillonella atypica
	8514AN6	8514	Bacillota	Negativicutes	Veillonellales	Veillonellaceae	Veillonella	Oral cavity	Veillonella parvula	Veillonella parvula_A	d__Bacteria;p__Bacillota_C;c__Negativicutes;o__Veillonellales;f__Veillonellaceae;g__Veillonella;s__Veillonella parvula_A
	8514AN7	8514	Actinomycetota	Actinomycetia	Actinomycetales	Actinomycetaceae	Pauljensenia	Oral cavity	Pauljensenia sp	Pauljensenia sp000185285	d__Bacteria;p__Actinomycetota;c__Actinomycetia;o__Actinomycetales;f__Actinomycetaceae;g__Pauljensenia;s__Pauljensenia sp000185285
	8514K1	8514	Bacillota	Bacilli	Lactobacillales	Lactobacillaceae	Lacticaseibacillus	Oral cavity	Lacticaseibacillus rhamnosus	Lacticaseibacillus rhamnosus	d__Bacteria;p__Bacillota;c__Bacilli;o__Lactobacillales;f__Lactobacillaceae;g__Lacticaseibacillus;s__Lacticaseibacillus rhamnosus
	8515A1	8515	Pseudomonadota	Gammaproteobacteria	Burkholderiales	Neisseriaceae	Neisseria	Oral cavity	Neisseria macacae	Neisseria macacae	d__Bacteria;p__Pseudomonadota;c__Gammaproteobacteria;o__Burkholderiales;f__Neisseriaceae;g__Neisseria;s__Neisseria macacae
	8515A2	8515	Bacillota	Bacilli	Staphylococcales	Staphylococcaceae	Staphylococcus	Oral cavity	Staphylococcus epidermidis	Staphylococcus epidermidis	d__Bacteria;p__Bacillota;c__Bacilli;o__Staphylococcales;f__Staphylococcaceae;g__Staphylococcus;s__Staphylococcus epidermidis
	8515A3	8515	Pseudomonadota	Gammaproteobacteria	Enterobacterales	Enterobacteriaceae	Citrobacter_B	Oral cavity	Citrobacter_B koseri	Citrobacter_B koseri	d__Bacteria;p__Pseudomonadota;c__Gammaproteobacteria;o__Enterobacterales;f__Enterobacteriaceae;g__Citrobacter_B;s__Citrobacter_B koseri
	8515A4	8515	Pseudomonadota	Gammaproteobacteria	Enterobacterales	Enterobacteriaceae	Citrobacter_B	Oral cavity	Citrobacter_B koseri	Citrobacter_B koseri	d__Bacteria;p__Pseudomonadota;c__Gammaproteobacteria;o__Enterobacterales;f__Enterobacteriaceae;g__Citrobacter_B;s__Citrobacter_B koseri
	8515A5	8515	Pseudomonadota	Gammaproteobacteria	Burkholderiales	Neisseriaceae	Neisseria	Oral cavity	Neisseria	Neisseria	d__Bacteria;p__Pseudomonadota;c__Gammaproteobacteria;o__Burkholderiales;f__Neisseriaceae;g__Neisseria;s__
	8515A8	8515	Bacillota	Bacilli	Lactobacillales	Streptococcaceae	Streptococcus	Oral cavity	Streptococcus oralis	Streptococcus oralis_BM	d__Bacteria;p__Bacillota;c__Bacilli;o__Lactobacillales;f__Streptococcaceae;g__Streptococcus;s__Streptococcus oralis_BM
	8515A9	8515	Bacillota	Bacilli	Lactobacillales	Streptococcaceae	Streptococcus	Oral cavity	Streptococcus oralis	Streptococcus oralis_BM	d__Bacteria;p__Bacillota;c__Bacilli;o__Lactobacillales;f__Streptococcaceae;g__Streptococcus;s__Streptococcus oralis_BM
	8515AN1	8515	Pseudomonadota	Gammaproteobacteria	Enterobacterales	Enterobacteriaceae	Citrobacter_B	Oral cavity	Citrobacter_B koseri	Citrobacter_B koseri	d__Bacteria;p__Pseudomonadota;c__Gammaproteobacteria;o__Enterobacterales;f__Enterobacteriaceae;g__Citrobacter_B;s__Citrobacter_B koseri
	8515AN11	8515	Bacillota	Bacilli	Lactobacillales	Streptococcaceae	Streptococcus	Oral cavity	Streptococcus sp	Streptococcus sp029691405	d__Bacteria;p__Bacillota;c__Bacilli;o__Lactobacillales;f__Streptococcaceae;g__Streptococcus;s__Streptococcus sp029691405
	8515AN14	8515	Bacillota	Bacilli	Lactobacillales	Streptococcaceae	Streptococcus	Oral cavity	Streptococcus gordonii	Streptococcus gordonii	d__Bacteria;p__Bacillota;c__Bacilli;o__Lactobacillales;f__Streptococcaceae;g__Streptococcus;s__Streptococcus gordonii
	8515AN4	8515	Bacillota	Bacilli	Lactobacillales	Streptococcaceae	Streptococcus	Oral cavity	Streptococcus salivarius	Streptococcus sanguinis_A	d__Bacteria;p__Bacillota;c__Bacilli;o__Lactobacillales;f__Streptococcaceae;g__Streptococcus;s__Streptococcus sanguinis_A
	8515AN6	8515	Bacillota	Bacilli	Lactobacillales	Streptococcaceae	Streptococcus	Oral cavity	Streptococcus sanguinis	Streptococcus sanguinis_A	d__Bacteria;p__Bacillota;c__Bacilli;o__Lactobacillales;f__Streptococcaceae;g__Streptococcus;s__Streptococcus sanguinis_A
	8515ANT1	8515	Pseudomonadota	Gammaproteobacteria	Enterobacterales	Enterobacteriaceae	Citrobacter_B	Digested tumour	Citrobacter_B koseri	Citrobacter_B koseri	d__Bacteria;p__Pseudomonadota;c__Gammaproteobacteria;o__Enterobacterales;f__Enterobacteriaceae;g__Citrobacter_B;s__Citrobacter_B koseri
	8515ANT3	8515	Pseudomonadota	Gammaproteobacteria	Enterobacterales	Enterobacteriaceae	Citrobacter_B	Digested tumour	Citrobacter_B koseri	Citrobacter_B koseri	d__Bacteria;p__Pseudomonadota;c__Gammaproteobacteria;o__Enterobacterales;f__Enterobacteriaceae;g__Citrobacter_B;s__Citrobacter_B koseri
	8524A1	8524	Pseudomonadota	Gammaproteobacteria	Enterobacterales	Enterobacteriaceae	Escherichia	Oral cavity	Escherichia coli	Escherichia coli	d__Bacteria;p__Pseudomonadota;c__Gammaproteobacteria;o__Enterobacterales;f__Enterobacteriaceae;g__Escherichia;s__Escherichia coli
	8524A10	8524	Bacillota	Bacilli	Lactobacillales	Streptococcaceae	Streptococcus	Oral cavity	Streptococcus mitis	Streptococcus mitis	d__Bacteria;p__Bacillota;c__Bacilli;o__Lactobacillales;f__Streptococcaceae;g__Streptococcus;s__Streptococcus mitis
	8524A2	8524	Pseudomonadota	Gammaproteobacteria	Enterobacterales	Enterobacteriaceae	Escherichia	Oral cavity	Escherichia coli	Escherichia coli	d__Bacteria;p__Pseudomonadota;c__Gammaproteobacteria;o__Enterobacterales;f__Enterobacteriaceae;g__Escherichia;s__Escherichia coli
	8524A4	8524	Bacillota	Bacilli	Lactobacillales	Streptococcaceae	Streptococcus	Oral cavity	Streptococcus salivarius	Streptococcus salivarius	d__Bacteria;p__Bacillota;c__Bacilli;o__Lactobacillales;f__Streptococcaceae;g__Streptococcus;s__Streptococcus salivarius
	8524A7	8524	Pseudomonadota	Gammaproteobacteria	Enterobacterales	Enterobacteriaceae	Escherichia	Oral cavity	Escherichia coli	Escherichia coli	d__Bacteria;p__Pseudomonadota;c__Gammaproteobacteria;o__Enterobacterales;f__Enterobacteriaceae;g__Escherichia;s__Escherichia coli
	8524A8	8524	Actinomycetota	Actinomycetia	Actinomycetales	Micrococcaceae	Rothia	Oral cavity	Rothia dentocariosa	Rothia dentocariosa	d__Bacteria;p__Actinomycetota;c__Actinomycetia;o__Actinomycetales;f__Micrococcaceae;g__Rothia;s__Rothia dentocariosa
	8524A9	8524	Bacillota	Bacilli	Lactobacillales	Streptococcaceae	Streptococcus	Oral cavity	Streptococcus symci	Streptococcus symci	d__Bacteria;p__Bacillota;c__Bacilli;o__Lactobacillales;f__Streptococcaceae;g__Streptococcus;s__Streptococcus symci
	8524AN2	8524	Pseudomonadota	Gammaproteobacteria	Enterobacterales	Enterobacteriaceae	Escherichia	Oral cavity	Escherichia coli	Escherichia coli	d__Bacteria;p__Pseudomonadota;c__Gammaproteobacteria;o__Enterobacterales;f__Enterobacteriaceae;g__Escherichia;s__Escherichia coli
	8524AN3	8524	Pseudomonadota	Gammaproteobacteria	Enterobacterales	Enterobacteriaceae	Escherichia	Oral cavity	Escherichia coli	Escherichia coli	d__Bacteria;p__Pseudomonadota;c__Gammaproteobacteria;o__Enterobacterales;f__Enterobacteriaceae;g__Escherichia;s__Escherichia coli
	8524AN5	8524	Bacillota	Bacilli	Lactobacillales	Streptococcaceae	Streptococcus	Oral cavity	Streptococcus mitis	Streptococcus mitis_BX	d__Bacteria;p__Bacillota;c__Bacilli;o__Lactobacillales;f__Streptococcaceae;g__Streptococcus;s__Streptococcus mitis_BX
	8524AN6	8524	Bacillota	Bacilli	Lactobacillales	Streptococcaceae	Streptococcus	Oral cavity	Streptococcus mitis	Streptococcus mitis	d__Bacteria;p__Bacillota;c__Bacilli;o__Lactobacillales;f__Streptococcaceae;g__Streptococcus;s__Streptococcus mitis
	8524AN7	8524	Pseudomonadota	Gammaproteobacteria	Enterobacterales	Enterobacteriaceae	Escherichia	Oral cavity	Escherichia coli	Escherichia coli	d__Bacteria;p__Pseudomonadota;c__Gammaproteobacteria;o__Enterobacterales;f__Enterobacteriaceae;g__Escherichia;s__Escherichia coli
	8524AN8	8524	Bacillota	Bacilli	Lactobacillales	Streptococcaceae	Streptococcus	Oral cavity	Streptococcus constellatus	Streptococcus constellatus	d__Bacteria;p__Bacillota;c__Bacilli;o__Lactobacillales;f__Streptococcaceae;g__Streptococcus;s__Streptococcus constellatus
	8524K1	8524	Pseudomonadota	Gammaproteobacteria	Enterobacterales	Enterobacteriaceae	Escherichia	Oral cavity	Escherichia coli	Escherichia coli	d__Bacteria;p__Pseudomonadota;c__Gammaproteobacteria;o__Enterobacterales;f__Enterobacteriaceae;g__Escherichia;s__Escherichia coli
	8524K2	8524	Pseudomonadota	Gammaproteobacteria	Pseudomonadales	Moraxellaceae	Acinetobacter	Oral cavity	Acinetobacter junii	Acinetobacter junii	d__Bacteria;p__Pseudomonadota;c__Gammaproteobacteria;o__Pseudomonadales;f__Moraxellaceae;g__Acinetobacter;s__Acinetobacter junii
	8524K4	8524	Pseudomonadota	Gammaproteobacteria	Enterobacterales	Enterobacteriaceae	Escherichia	Oral cavity	Escherichia coli	Escherichia coli	d__Bacteria;p__Pseudomonadota;c__Gammaproteobacteria;o__Enterobacterales;f__Enterobacteriaceae;g__Escherichia;s__Escherichia coli
	8524M2	8524	Bacillota	Bacilli	Lactobacillales	Enterococcaceae	Enterococcus	Oral cavity	Enterococcus faecalis	Enterococcus faecalis	d__Bacteria;p__Bacillota;c__Bacilli;o__Lactobacillales;f__Enterococcaceae;g__Enterococcus;s__Enterococcus faecalis
	8524M3	8524	Pseudomonadota	Gammaproteobacteria	Enterobacterales	Enterobacteriaceae	Escherichia	Oral cavity	Escherichia coli	Escherichia coli	d__Bacteria;p__Pseudomonadota;c__Gammaproteobacteria;o__Enterobacterales;f__Enterobacteriaceae;g__Escherichia;s__Escherichia coli
	8543A1	8543	Bacillota	Bacilli	Lactobacillales	Streptococcaceae	Streptococcus	Oral cavity	Streptococcus salivarius	Streptococcus sanguinis_H	d__Bacteria;p__Bacillota;c__Bacilli;o__Lactobacillales;f__Streptococcaceae;g__Streptococcus;s__Streptococcus sanguinis_H
	8543A2	8543	Actinomycetota	Actinomycetia	Actinomycetales	Actinomycetaceae	Actinomyces	Oral cavity	Actinomyces oris	Actinomyces oris	d__Bacteria;p__Actinomycetota;c__Actinomycetia;o__Actinomycetales;f__Actinomycetaceae;g__Actinomyces;s__Actinomyces oris
	8543A7	8543	Bacillota	Bacilli	Lactobacillales	Streptococcaceae	Streptococcus	Oral cavity	Streptococcus mitis	Streptococcus mitis_BX	d__Bacteria;p__Bacillota;c__Bacilli;o__Lactobacillales;f__Streptococcaceae;g__Streptococcus;s__Streptococcus mitis_BX
	8543AN1	8543	Bacillota	Bacilli	Lactobacillales	Streptococcaceae	Streptococcus	Oral cavity	Streptococcus anginosus	Streptococcus anginosus	d__Bacteria;p__Bacillota;c__Bacilli;o__Lactobacillales;f__Streptococcaceae;g__Streptococcus;s__Streptococcus anginosus
	8543AN4	8543	Bacillota	Bacilli	Lactobacillales	Streptococcaceae	Streptococcus	Oral cavity	Streptococcus constellatus	Streptococcus constellatus	d__Bacteria;p__Bacillota;c__Bacilli;o__Lactobacillales;f__Streptococcaceae;g__Streptococcus;s__Streptococcus constellatus
	8606A1	8606	Actinomycetota	Actinomycetia	Actinomycetales	Micrococcaceae	Rothia	Oral cavity	Rothia aeria	Rothia aeria	d__Bacteria;p__Actinomycetota;c__Actinomycetia;o__Actinomycetales;f__Micrococcaceae;g__Rothia;s__Rothia aeria
	8606AN2	8606	Bacillota	Bacilli	Lactobacillales	Streptococcaceae	Streptococcus	Oral cavity	Streptococcus xiaochunlingii	Streptococcus xiaochunlingii	d__Bacteria;p__Bacillota;c__Bacilli;o__Lactobacillales;f__Streptococcaceae;g__Streptococcus;s__Streptococcus xiaochunlingii
	8606AN6	8606	Bacillota	Negativicutes	Veillonellales	Veillonellaceae	Veillonella	Oral cavity	Veillonella atypica	Veillonella atypica	d__Bacteria;p__Bacillota_C;c__Negativicutes;o__Veillonellales;f__Veillonellaceae;g__Veillonella;s__Veillonella atypica
	8607A1	8607	Actinomycetota	Actinomycetia	Actinomycetales	Micrococcaceae	Rothia	Oral cavity	Rothia dentocariosa	Rothia dentocariosa	d__Bacteria;p__Actinomycetota;c__Actinomycetia;o__Actinomycetales;f__Micrococcaceae;g__Rothia;s__Rothia dentocariosa
	8607AN1.1	8607	Fusobacteriota	Fusobacteriia	Fusobacteriales	Fusobacteriaceae	Fusobacterium	Oral cavity	Fusobacterium polymorphum	Fusobacterium polymorphum	d__Bacteria;p__Fusobacteriota;c__Fusobacteriia;o__Fusobacteriales;f__Fusobacteriaceae;g__Fusobacterium;s__Fusobacterium polymorphum
	8607AN1.1-2	8607	Fusobacteriota	Fusobacteriia	Fusobacteriales	Fusobacteriaceae	Fusobacterium	Oral cavity	Fusobacterium polymorphum	Fusobacterium polymorphum	d__Bacteria;p__Fusobacteriota;c__Fusobacteriia;o__Fusobacteriales;f__Fusobacteriaceae;g__Fusobacterium;s__Fusobacterium polymorphum
	8607AN1.2	8607	Fusobacteriota	Fusobacteriia	Fusobacteriales	Fusobacteriaceae	Fusobacterium	Oral cavity	Fusobacterium polymorphum	Fusobacterium polymorphum	d__Bacteria;p__Fusobacteriota;c__Fusobacteriia;o__Fusobacteriales;f__Fusobacteriaceae;g__Fusobacterium;s__Fusobacterium polymorphum
	8607AN2	8607	Bacillota	Bacilli	Lactobacillales	Streptococcaceae	Streptococcus	Oral cavity	Streptococcus anginosus	Streptococcus anginosus	d__Bacteria;p__Bacillota;c__Bacilli;o__Lactobacillales;f__Streptococcaceae;g__Streptococcus;s__Streptococcus anginosus
	8607AN3	8607	Bacillota	Bacilli	Lactobacillales	Streptococcaceae	Streptococcus	Oral cavity	Streptococcus anginosus	Streptococcus anginosus	d__Bacteria;p__Bacillota;c__Bacilli;o__Lactobacillales;f__Streptococcaceae;g__Streptococcus;s__Streptococcus anginosus
	8633AN2	8633	Bacillota	Bacilli	Lactobacillales	Streptococcaceae	Streptococcus	Oral cavity	Streptococcus anginosus	Streptococcus anginosus	d__Bacteria;p__Bacillota;c__Bacilli;o__Lactobacillales;f__Streptococcaceae;g__Streptococcus;s__Streptococcus anginosus
	8633AN4	8633	Bacillota	Bacilli	Lactobacillales	Streptococcaceae	Streptococcus	Oral cavity	Streptococcus BHI	Streptococcus BHI	d__Bacteria;p__Bacillota;c__Bacilli;o__Lactobacillales;f__Streptococcaceae;g__Streptococcus;s__
	8633TD2	8633	Actinomycetota	Actinomycetia	Actinomycetales	Actinomycetaceae	Pauljensenia	Digested tumour	Pauljensenia sp	Pauljensenia sp958349165	d__Bacteria;p__Actinomycetota;c__Actinomycetes;o__Actinomycetales;f__Actinomycetaceae;g__Pauljensenia;s__Pauljensenia sp958349165
	8633TD5	8633	Bacillota	Bacilli	Lactobacillales	Streptococcaceae	Streptococcus	Digested tumour	Streptococcus sinensis	Streptococcus sinensis	d__Bacteria;p__Bacillota;c__Bacilli;o__Lactobacillales;f__Streptococcaceae;g__Streptococcus;s__Streptococcus sinensis
	8633TD6	8633	Bacteroidota	Bacteroidia	Bacteroidales	Bacteroidaceae	Prevotella	Digested tumour	Prevotella pallens	Prevotella pallens	d__Bacteria;p__Bacteroidota;c__Bacteroidia;o__Bacteroidales;f__Bacteroidaceae;g__Prevotella;s__Prevotella pallens
	8676A1	8676	Bacillota	Bacilli	Lactobacillales	Enterococcaceae	Enterococcus	Oral cavity	Enterococcus faecalis	Enterococcus faecalis	d__Bacteria;p__Bacillota;c__Bacilli;o__Lactobacillales;f__Enterococcaceae;g__Enterococcus;s__Enterococcus faecalis
	8676A3	8676	Bacillota	Bacilli	Lactobacillales	Streptococcaceae	Streptococcus	Oral cavity	Streptococcus mitis	Streptococcus mitis_BZ	d__Bacteria;p__Bacillota;c__Bacilli;o__Lactobacillales;f__Streptococcaceae;g__Streptococcus;s__Streptococcus mitis_BZ
	8676A4	8676	Bacillota	Bacilli	Lactobacillales	Enterococcaceae	Enterococcus	Oral cavity	Enterococcus faecalis	Enterococcus faecalis	d__Bacteria;p__Bacillota;c__Bacilli;o__Lactobacillales;f__Enterococcaceae;g__Enterococcus;s__Enterococcus faecalis
	8676A5	8676	Pseudomonadota	Gammaproteobacteria	Burkholderiales	Neisseriaceae	Neisseria	Oral cavity	Neisseria sicca	Neisseria sicca_B	d__Bacteria;p__Pseudomonadota;c__Gammaproteobacteria;o__Burkholderiales;f__Neisseriaceae;g__Neisseria;s__Neisseria sicca_B
	8676A6	8676	Bacillota	Bacilli	Lactobacillales	Streptococcaceae	Streptococcus	Oral cavity	Streptococcus mitis	Streptococcus mitis	d__Bacteria;p__Bacillota;c__Bacilli;o__Lactobacillales;f__Streptococcaceae;g__Streptococcus;s__Streptococcus mitis
	8676A7	8676	Bacillota	Bacilli	Lactobacillales	Streptococcaceae	Streptococcus	Oral cavity	Streptococcus gordonii	Streptococcus gordonii	d__Bacteria;p__Bacillota;c__Bacilli;o__Lactobacillales;f__Streptococcaceae;g__Streptococcus;s__Streptococcus gordonii
	8676AN3	8676	Actinomycetota	Actinomycetia	Actinomycetales	Actinomycetaceae	Actinomyces	Oral cavity	Actinomyces graevenitzii	Actinomyces graevenitzii	d__Bacteria;p__Actinomycetota;c__Actinomycetia;o__Actinomycetales;f__Actinomycetaceae;g__Actinomyces;s__Actinomyces graevenitzii
	8676AN4	8676	Bacillota	Negativicutes	Veillonellales	Veillonellaceae	Veillonella	Oral cavity	Veillonella atypica	Veillonella atypica	d__Bacteria;p__Bacillota_C;c__Negativicutes;o__Veillonellales;f__Veillonellaceae;g__Veillonella;s__Veillonella atypica
	8676AN5	8676	Bacillota	Bacilli	Lactobacillales	Streptococcaceae	Streptococcus	Oral cavity	Streptococcus mitis	Streptococcus mitis_BZ	d__Bacteria;p__Bacillota;c__Bacilli;o__Lactobacillales;f__Streptococcaceae;g__Streptococcus;s__Streptococcus mitis_BZ
	8676AN8	8676	Bacillota	Bacilli	Lactobacillales	Streptococcaceae	Streptococcus	Oral cavity	Streptococcus pseudopneumoniae	Streptococcus pseudopneumoniae_N	d__Bacteria;p__Bacillota;c__Bacilli;o__Lactobacillales;f__Streptococcaceae;g__Streptococcus;s__Streptococcus pseudopneumoniae_N
	8676OA1	8676	Bacillota	Bacilli	Staphylococcales	Staphylococcaceae	Staphylococcus	Oral cavity	Staphylococcus aureus	Staphylococcus aureus	d__Bacteria;p__Bacillota;c__Bacilli;o__Staphylococcales;f__Staphylococcaceae;g__Staphylococcus;s__Staphylococcus aureus
	8691A1	8691	Actinomycetota	Actinomycetia	Actinomycetales	Actinomycetaceae	Actinomyces	Oral cavity	Actinomyces sp	Actinomyces sp915069725	d__Bacteria;p__Actinomycetota;c__Actinomycetia;o__Actinomycetales;f__Actinomycetaceae;g__Actinomyces;s__Actinomyces sp915069725
	8691A3	8691	Pseudomonadota	Gammaproteobacteria	Burkholderiales	Neisseriaceae	Neisseria	Oral cavity	Neisseria sp	Neisseria sp000186165	d__Bacteria;p__Pseudomonadota;c__Gammaproteobacteria;o__Burkholderiales;f__Neisseriaceae;g__Neisseria;s__Neisseria sp000186165
	8691AN1	8691	Bacillota	Bacilli	Lactobacillales	Streptococcaceae	Streptococcus	Oral cavity	Streptococcus mitis	Streptococcus mitis_AT	d__Bacteria;p__Bacillota;c__Bacilli;o__Lactobacillales;f__Streptococcaceae;g__Streptococcus;s__Streptococcus mitis_AT
	8691AN2	8691	Bacillota	Bacilli	Lactobacillales	Streptococcaceae	Streptococcus	Oral cavity	Streptococcus gordonii	Streptococcus gordonii	d__Bacteria;p__Bacillota;c__Bacilli;o__Lactobacillales;f__Streptococcaceae;g__Streptococcus;s__Streptococcus gordonii
	8691DM1	8691	Bacillota	Bacilli	Staphylococcales	Staphylococcaceae	Staphylococcus	Digested tumour	Staphylococcus hominis	Staphylococcus hominis	d__Bacteria;p__Bacillota;c__Bacilli;o__Staphylococcales;f__Staphylococcaceae;g__Staphylococcus;s__Staphylococcus hominis
	8691DM4	8691	Bacillota	Bacilli	Lactobacillales	Streptococcaceae	Streptococcus	Digested tumour	Streptococcus xiaochunlingii	Streptococcus xiaochunlingii	d__Bacteria;p__Bacillota;c__Bacilli;o__Lactobacillales;f__Streptococcaceae;g__Streptococcus;s__Streptococcus xiaochunlingii
	8691DM5	8691	Bacillota	Bacilli	Lactobacillales	Streptococcaceae	Streptococcus	Digested tumour	Streptococcus gordonii	Streptococcus gordonii	d__Bacteria;p__Bacillota;c__Bacilli;o__Lactobacillales;f__Streptococcaceae;g__Streptococcus;s__Streptococcus gordonii
	8691DM7	8691	Bacillota	Bacilli	Lactobacillales	Streptococcaceae	Streptococcus	Digested tumour	Streptococcus gordonii	Streptococcus gordonii	d__Bacteria;p__Bacillota;c__Bacilli;o__Lactobacillales;f__Streptococcaceae;g__Streptococcus;s__Streptococcus gordonii
	8691OA9	8691	Bacillota	Bacilli	Lactobacillales	Streptococcaceae	Streptococcus	Oral cavity	Streptococcus mitis	Streptococcus mitis_AT	d__Bacteria;p__Bacillota;c__Bacilli;o__Lactobacillales;f__Streptococcaceae;g__Streptococcus;s__Streptococcus mitis_AT

## Sheet: summary
Supplementary Table 2: Species-level relative abundance of isolates across samples
Species	n	percentage (%)
Acinetobacter junii	1	0.314465
Actinomyces graevenitzii	1	0.314465
Actinomyces naeslundii	1	0.314465
Actinomyces oris	2	0.628931
Actinomyces sp	1	0.314465
Bacteroides fragilis	1	0.314465
Citrobacter_B koseri	5	1.57233
Enterobacter asburiae	1	0.314465
Enterobacter hormaechei	11	3.45912
Enterobacter roggenkampii	1	0.314465
Enterococcus faecalis	8	2.51572
Escherichia coli	21	6.60377
Fusobacterium	1	0.314465
Fusobacterium hwasookii	1	0.314465
Fusobacterium nucleatum	1	0.314465
Fusobacterium periodonticum	1	0.314465
Fusobacterium polymorphum	4	1.25786
Gemella	1	0.314465
Gemella haemolysans	1	0.314465
Granulicatella sp	1	0.314465
Klebsiella grimontii	1	0.314465
Lachnoanaerobaculum	2	0.628931
Lachnoanaerobaculum orale	1	0.314465
Lacticaseibacillus rhamnosus	1	0.314465
Limosilactobacillus fermentum	2	0.628931
Neisseria	5	1.57233
Neisseria cinerea	2	0.628931
Neisseria flavescens	1	0.314465
Neisseria macacae	1	0.314465
Neisseria mucosa	1	0.314465
Neisseria perflava	5	1.57233
Neisseria sicca	2	0.628931
Neisseria sp	3	0.943396
Paenibacillus	1	0.314465
Pauljensenia sp	4	1.25786
Peptostreptococcus anaerobius	1	0.314465
Prevotella	2	0.628931
Prevotella pallens	1	0.314465
Pseudomonas aeruginosa	1	0.314465
Rothia	2	0.628931
Rothia aeria	1	0.314465
Rothia dentocariosa	7	2.20126
Rothia mucilaginosa	4	1.25786
Staphylococcus aureus	6	1.88679
Staphylococcus capitis	1	0.314465
Staphylococcus epidermidis	8	2.51572
Staphylococcus haemolyticus	5	1.57233
Staphylococcus hominis	2	0.628931
Staphylococcus warneri	1	0.314465
Streptococcus anginosus	15	4.71698
Streptococcus BHI	20	6.28931
Streptococcus caecimuris	1	0.314465
Streptococcus constellatus	7	2.20126
Streptococcus cristatus	1	0.314465
Streptococcus gordonii	14	4.40252
Streptococcus hominis	9	2.83019
Streptococcus infantis	10	3.14465
Streptococcus massiliensis	3	0.943396
Streptococcus mitis	20	6.28931
Streptococcus mutans	1	0.314465
Streptococcus oralis	10	3.14465
Streptococcus parasanguinis	15	4.71698
Streptococcus pseudopneumoniae	1	0.314465
Streptococcus rubneri	2	0.628931
Streptococcus salivarius	12	3.77358
Streptococcus sanguinis	1	0.314465
Streptococcus sinensis	1	0.314465
Streptococcus sp	8	2.51572
Streptococcus symci	1	0.314465
Streptococcus vestibularis	4	1.25786
Streptococcus xiaochunlingii	4	1.25786
Veillonella atypica	9	2.83019
Veillonella denticariosi	1	0.314465
Veillonella dispar	1	0.314465
Veillonella nakazawae	1	0.314465
Veillonella parvula	7	2.20126
Veillonella parvula	7	2.20126

## Sheet: Quality_check
Supplementary Table 3: Nanopore sequencing quality control metrics
isolate_id	Long_Read_File_Size_Bytes	Hybracter Long Assembly Round 1	Complete R1	Total_assembly_length R1	Number_of_contigs R1	Longest_contig_length R1	Non Chrom Contig Size	Actual Complete	Short Reads	Continue Analysis	CheckM2 Pass	GTDB Pass
10953	159710568		FALSE	2043163	127	125192		FALSE	FALSE	FALSE
11326	374987815		TRUE	2114090	1	2114090	0	TRUE	FALSE	TRUE	TRUE	TRUE
25586	277852767		FALSE	2176554	4	1176799		FALSE	FALSE	FALSE
51191	290527892		FALSE	2553871	10	564702		FALSE	FALSE	FALSE
8305AN2	No LR								TRUE	TRUE	TRUE	TRUE
8305AN3	No LR								TRUE	TRUE	TRUE	TRUE
8305AN4	641726874		TRUE	1937418	1	1937418	0	TRUE	TRUE	TRUE	TRUE	TRUE
8305OA1	102391455		TRUE	2279881	1	2279881	0	TRUE	FALSE	TRUE	TRUE	TRUE
8305OA4	149950828		TRUE	2091830	1	2091830	0	TRUE	FALSE	TRUE	TRUE	TRUE
8305OAN2	7584103	Under 10MB	#N/A	1617414	118	77961		FALSE	FALSE	FALSE
8305OAN3	171868909		TRUE	1937678	1	1937678	0	TRUE	FALSE	TRUE	TRUE	TRUE
8305OAN4	59205337		FALSE	1858039	20	606747		FALSE	FALSE	FALSE
8305OAN5	28384191		FALSE	2355558	178	70028		FALSE	FALSE	FALSE
8324AN10	No LR								TRUE	TRUE	TRUE	TRUE
8324AN2	221227712		FALSE	5320575	21	1369011		FALSE	FALSE	FALSE
8324AN5	246043855		TRUE	5315395	10	2504201	2811194	FALSE	TRUE	TRUE	TRUE	TRUE
8324OA1	581676744		TRUE	5292631	18	2203064	3089567	FALSE	FALSE	FALSE
8324OA8	345925888	Dupe - assembled with Flye (Complete)	#N/A	#N/A	#N/A	#N/A		TRUE	TRUE	TRUE	TRUE	TRUE
8324OAN10	89196210		FALSE	5281491	92	438392		FALSE	FALSE	FALSE
8324OAN4	146152341		TRUE	5270491	13	2508409	2762082	FALSE	FALSE	FALSE
8324OAN5	48504927		FALSE	5285982	139	202562		FALSE	FALSE	FALSE
8324OAN6	83096773		TRUE	5257512	43	2214829	3042683	FALSE	FALSE	FALSE
8324OAN7	82827225		TRUE	5210477	16	1800065	3410412	FALSE	FALSE	FALSE
8324OAN8	85032477		TRUE	2082639	2	1883327	199312	TRUE	FALSE	TRUE	TRUE	TRUE
8324OAN9	205849833		TRUE	5310556	4	5181857	128699	TRUE	FALSE	TRUE	TRUE	TRUE
8337AN1	317820911		TRUE	5253435	25	2196876	3056559	FALSE	FALSE	FALSE
8337AN2	234834060		FALSE	5311089	20	1360041		FALSE	TRUE	TRUE	TRUE	TRUE
8355A1	122988440		TRUE	2233672	2	2229407	4265	TRUE	TRUE	TRUE	TRUE	TRUE
8355A2	49855079		FALSE	2385498	161	86791		FALSE	FALSE	FALSE
8355A3	173878611		TRUE	2372595	1	2372595	0	TRUE	FALSE	TRUE	TRUE	TRUE
8355A4	452280270		FALSE	5239903	117	606760		FALSE	FALSE	FALSE
8355A5	61953124		FALSE	2030384	52	403717		FALSE	TRUE	TRUE	FALSE - mixed culture
8355A6	115823115		TRUE	2230728	1	2230728	0	TRUE	TRUE	TRUE	TRUE	TRUE
8355AN1	375678168		TRUE	2062813	1	2062813	0	TRUE	TRUE	TRUE	TRUE	TRUE
8355AN2	52209632		TRUE	2192514	13	1646451	546063	FALSE	TRUE	TRUE	TRUE	TRUE
8355OA5	693421296		TRUE	4168843	71	2122410	2046433	FALSE	FALSE	FALSE
8389AN2	143033251		TRUE	2747000	3	2728274	18726	TRUE	FALSE	TRUE	TRUE	TRUE
8389DM1	236212937		TRUE	3451732	34	2728286	723446	TRUE - mixed culture	TRUE	FALSE
8389DM2	326474619		FALSE	9606223	142	1470065		FALSE	TRUE	TRUE	TRUE	TRUE
8389DM3	28368273		FALSE	3283082	21	594974		FALSE	TRUE	TRUE	TRUE	TRUE
8389DM4	354441574		FALSE	7301288	127	1312883		FALSE	TRUE	TRUE	FALSE - mixed culture
8389DM5	114279030		FALSE	6233506	678	966824		FALSE	TRUE	TRUE	TRUE	TRUE
8389DM6	186010386		TRUE	2264981	1	2264981	0	TRUE	FALSE	TRUE	TRUE	TRUE
8389O1	304540263		TRUE	2549440	124	1786203	763237	FALSE	FALSE	FALSE
8389O2	387684585		TRUE	5224027	2	5220854	3173	TRUE	FALSE	TRUE	TRUE	TRUE
8389O4	204063432		TRUE	1828843	2	1792369	36474	TRUE	TRUE	TRUE	TRUE	TRUE
8389OA1	276454	Under 10MB	#N/A	121074	24	22693		FALSE	TRUE	TRUE	TRUE	FALSE - mixed culture
8389OA2	2733332	Under 10MB	#N/A	1546991	135	57303		FALSE	FALSE	FALSE
8389OA5	367925423		FALSE	4019576	164	950939		FALSE	TRUE	TRUE	FALSE - mixed culture
8389S2	420579460		TRUE	2037393	3	2000839	36554	TRUE	FALSE	TRUE	TRUE	TRUE
8389S4	57475885		FALSE	2257188	17	705396		FALSE	FALSE	FALSE
8389S5	695762323		TRUE	2747005	3	2728284	18721	TRUE	FALSE	TRUE	TRUE	TRUE
8389SA1	363665755		FALSE	6448106	252	299314		FALSE	FALSE	FALSE
8389SA2	4839202	Under 10MB	#N/A	1128980	54	69236		FALSE	FALSE	FALSE
8389SA3	39687239		FALSE	2137989	192	118421		FALSE	TRUE	TRUE	FALSE - mixed culture
8389SA4	211872144		TRUE	2262172	1	2262172	0	TRUE	TRUE	TRUE	TRUE	TRUE
8399OA1	146888990		FALSE	2226321	4	1387727		FALSE	FALSE	FALSE
8408A2	116191335		TRUE	1958132	1	1958132	0	TRUE	TRUE	TRUE
8408OA1	66957345		FALSE	2987614	35	325124		FALSE	FALSE	FALSE
8408OA3	91961603		TRUE	2114756	3	2083637	31119	TRUE	TRUE	TRUE	TRUE	TRUE
8408OA5	228340272		TRUE	6373733	38	3100467	3273266	FALSE	FALSE	FALSE
8420OA2	62144503		FALSE	2039000	42	307164		FALSE	TRUE	TRUE	TRUE	TRUE
8420OA3	383010975		TRUE	1870037	1	1870037	0	TRUE	TRUE	TRUE	TRUE	TRUE
8421A2	43813742		FALSE	2047721	87	138814		FALSE	FALSE	FALSE
8421A4	No LR								TRUE	TRUE	TRUE	TRUE
8421AN4	87690216		TRUE	2086339	2	2075046	11293	TRUE	TRUE	TRUE
8421OA2	710682458		FALSE	2361319	2	2320828	40491	TRUE - mixed culture	TRUE	FALSE
8421OA3	137465022		TRUE	2302892	1	2302892	0	TRUE	TRUE	TRUE	TRUE	TRUE
8421OA4	27988365		FALSE	2271866	259	75599		FALSE	FALSE	FALSE
8431AN1	92055306		TRUE	2120100	9	1665066	455034	FALSE	TRUE	TRUE	TRUE	TRUE
8431AN6	No LR								TRUE	TRUE	TRUE	TRUE
8431OAN7	240885006		TRUE	2138095	2	1995551	142544	FALSE	FALSE	FALSE
8451AG1	69423099		FALSE	2127417	51	345603		FALSE	FALSE	FALSE
8451AG2	202088937		TRUE	2121865	4	1616064	505801	FALSE	TRUE	TRUE	TRUE	TRUE
8451AG5	49410052		FALSE	2359233	21	445107		FALSE	FALSE	FALSE
8451AG6	29978654		FALSE	1681541	249	43717		FALSE	FALSE	FALSE
8451AG7	14576844		FALSE	1529116	187	42688		FALSE	TRUE	TRUE	FALSE - mixed culture
8451AN4	194994750		FALSE	1803458	14	534425		FALSE	FALSE	FALSE
8451AN7	105264488		TRUE	2336738	1	2336738	0	TRUE	FALSE	TRUE	TRUE	TRUE
8451ANG1	686615	Under 10MB	#N/A	1741093	307	28040		FALSE	TRUE	TRUE	TRUE	TRUE
8451ANG2	79512575		TRUE	2255121	1	2255121	0	TRUE	TRUE	TRUE	TRUE	TRUE
8451ANG5	2234694	Under 10MB	#N/A	1320731	112	55284		FALSE	TRUE	TRUE	TRUE	TRUE
8451ANG6	1703260	Under 10MB	#N/A	2073270	329	44733		FALSE	TRUE	TRUE	TRUE	TRUE
8451ANT1	870273	Under 10MB	#N/A	4313486	555	34526		FALSE	TRUE	TRUE	TRUE	TRUE
8451ANT4	14510537		FALSE	1320731	112	55284		FALSE	TRUE	TRUE	TRUE	TRUE
8451AT1	63551803		FALSE	2322262	97	151232		FALSE	TRUE	TRUE	TRUE	TRUE
8451AT2-1	789729	Under 10MB	#N/A	3187615	659	30653		FALSE	FALSE	FALSE
8451AT3	486073	Under 10MB	#N/A	1309249	227	24318		FALSE	FALSE	FALSE
8451AT4	194479407		FALSE	4140263	9	1266306		FALSE	TRUE	TRUE	TRUE	TRUE
8451AT5	274686	Under 10MB	#N/A	508305	114	19448		FALSE	TRUE	TRUE	TRUE	TRUE
8451AT6	406101883		TRUE	1804607	2	1795690	8917	TRUE	TRUE	TRUE	TRUE	TRUE
8451AT7	132315927		TRUE	2448768	1	2448768	0	TRUE	TRUE	TRUE	TRUE	TRUE
8451AT8	8884788	Under 10MB	#N/A	2385498	161	86791		FALSE	TRUE	TRUE	TRUE	TRUE
8451DM1	3049025	Under 10MB	#N/A	808602	53	59130		FALSE	TRUE	TRUE	TRUE	TRUE
8451DM10	300719601		TRUE	1942972	1	1942972	0	TRUE	FALSE - SR but failed (no reads	TRUE	TRUE	TRUE
8451DM11	312425627		TRUE	4044236	3	2102573	1941663	TRUE - 2 chrom assembled	TRUE	FALSE
8451DM12	54892285		FALSE	2205377	57	403756		FALSE	TRUE	TRUE	TRUE	TRUE
8451DM13	20938879		FALSE	2270606	8	710385		FALSE	TRUE	TRUE	TRUE	TRUE
8451DM14	1702262	Under 10MB	#N/A	1681541	249	43717		FALSE	TRUE	TRUE	TRUE	TRUE
8451DM15	177945517		TRUE	2701290	1	2701290	0	TRUE	FALSE	TRUE	TRUE	TRUE
8451DM4	258779110		TRUE	2103900	1	2103900	0	TRUE	TRUE	TRUE	TRUE	TRUE
8451DM8	124621321		TRUE	1941971	1	1941971	0	TRUE	TRUE	TRUE	TRUE	TRUE
8451DM9	596171259		TRUE	1946569	1	1946569	0	TRUE	TRUE	TRUE	TRUE	TRUE
8457AN4	513154555		FALSE	2198145	6	1033218		FALSE	FALSE	FALSE
8457ANT31	No LR								TRUE	TRUE	TRUE	TRUE
8457AT1	No LR								TRUE	TRUE	FALSE - mixed culture
8457AT2	No LR								TRUE	TRUE	TRUE	TRUE
8457AT3	1936486	Under 10MB	#N/A	1962263	225	53558		FALSE	TRUE	TRUE	FALSE - mixed culture
8457AT5	No LR								TRUE	TRUE	FALSE - mixed culture
8457OAN1	17333114		FALSE	1204352	127	53702		FALSE	TRUE	TRUE	TRUE	TRUE
8457OAN2	150097081		TRUE	5086204	5	4204878	881326	FALSE	FALSE	FALSE
8457OAN3	125275867		FALSE	2200846	5	1022452		FALSE	TRUE	TRUE	TRUE	TRUE
8457OAN4	No LR								TRUE	TRUE	TRUE	TRUE
8457OAN7	65002861		FALSE	2114711	11	662992		FALSE	FALSE	FALSE
8457T1	50818465		FALSE	4481780	646	50113		FALSE	FALSE	FALSE
8457T2	1317703	Under 10MB	#N/A	1925532	287	37791		FALSE	FALSE	FALSE
8457T3	25578081		FALSE	2738502	236	66687		FALSE	FALSE	FALSE
8457T5	27683	Under 10MB	#N/A	358090	83	10266		FALSE	FALSE	FALSE
8468AN4	No LR								TRUE	TRUE	TRUE	TRUE
8468DM1	278440109		TRUE	5021771	5	5005797	15974	TRUE	FALSE	TRUE	TRUE	TRUE
8468DM2	2174043	Under 10MB	#N/A	1893610	190	55009		FALSE	TRUE	TRUE	TRUE	TRUE
8468DM3	36076752		FALSE	2115688	64	157603		FALSE	FALSE	FALSE
8468DM3-1	1523840	Under 10MB	#N/A	702939	75	41650		FALSE	FALSE	FALSE
8468DM31	No LR								TRUE	TRUE	TRUE	TRUE
8468DM5	62574210		FALSE	2377573	52	424949		FALSE	FALSE	FALSE
8468DM6	224127851		TRUE	2146412	1	2146412	0	TRUE	FALSE	TRUE	TRUE	TRUE
8468OA4	55555762		FALSE	2211135	13	1370658		FALSE	FALSE	FALSE
8468OAN1	205257759		TRUE	2070499	2	2031344	39155	TRUE	FALSE	TRUE	TRUE	TRUE
8468OAN3	121087807		TRUE	1740772	1	1740772	0	TRUE	FALSE	TRUE	TRUE	TRUE
8468OAN4	81918398		FALSE	2355232	38	1359884		FALSE	FALSE	FALSE
8468OAN5	48064978		FALSE	3759440	142	1025353		FALSE	FALSE	FALSE
8484A3	117778848		TRUE	2050125	2	2040122	10003	TRUE	FALSE	TRUE	TRUE	TRUE
8484A4	21532170		FALSE	1937358	38	246112		FALSE	FALSE	FALSE
8484A6	109200801		FALSE	2092500	5	760534		FALSE	FALSE	FALSE
8484A7	138416264		TRUE	3896326	3	1874139	2022187	TRUE - 2 chrom assembled	FALSE	FALSE
8484A8	61199355		TRUE	2050010	2	2040025	9985	TRUE	TRUE	TRUE	TRUE	TRUE
8484AN1	283407160		TRUE	5097317	9	5005939	91378	TRUE	FALSE	TRUE	TRUE	TRUE
8484AN2	197609931		TRUE	5068609	5	5005944	62665	TRUE	FALSE	TRUE	TRUE	TRUE
8484AN9	95212663		FALSE	2628547	21	939963		FALSE	FALSE	FALSE
8485A1	127186627		FALSE	2554123	14	1326934		FALSE	FALSE	FALSE
8485A2	95381229		FALSE	2054624	9	623999		FALSE	TRUE	TRUE	TRUE	TRUE
8485A3	454146023		TRUE	2631273	2	2601953	29320	TRUE	FALSE	TRUE	TRUE	TRUE
8485A4	29043687		FALSE	2202503	69	262429		FALSE	FALSE	FALSE
8485A5	272357025		TRUE	2633659	3	2601938	31721	TRUE	FALSE	TRUE	TRUE	TRUE
8485AN1	35153266		FALSE	1881709	20	301590		FALSE	TRUE	TRUE	TRUE	TRUE
8485AN10	38828532		TRUE	1928289	1	1928289	0	TRUE	FALSE	TRUE	TRUE	TRUE
8485AN20	No LR								TRUE	TRUE	FALSE - mixed culture
8485AN30	No LR								TRUE	TRUE	TRUE	FALSE - mixed culture
8485AN4	33776226		FALSE	1966492	15	610066		FALSE	TRUE	TRUE	TRUE	TRUE
8485AN5	158362124		TRUE	5366048	71	5006485	359563	TRUE - mixed culture	FALSE	FALSE
8485AN6	48758292		FALSE	5004470	146	180430		FALSE	FALSE	FALSE
8485DM1	113760185		TRUE	4998364	3	4940028	58336	TRUE	TRUE	TRUE	TRUE	TRUE
8485DM2	142620608		TRUE	5177179	7	3454879	1722300	FALSE	TRUE	TRUE	TRUE	TRUE
8485DM3	174818781		TRUE	2242359	2	2201385	40974	TRUE	TRUE	TRUE	TRUE	TRUE
8485DM4	127522049		FALSE	2238124	6	1249071		FALSE	TRUE	TRUE	TRUE	TRUE
8485DM5	76644502		TRUE	5147801	16	1769436	3378365	FALSE	TRUE	TRUE	TRUE	TRUE
8485DM6	4968974	Under 10MB	#N/A	2355558	178	70028		FALSE	TRUE	TRUE	TRUE	TRUE
8494AN1	84085787		FALSE	4149409	18	1159270		FALSE	FALSE	FALSE
8494AN11	128759855		TRUE	2136806	1	2136806	0	TRUE	FALSE	TRUE	TRUE	TRUE
8494AN12	414721494		FALSE	2512031	3	1370727		FALSE	FALSE	FALSE
8494AN3	142845041		TRUE	2149816	1	2149816	0	TRUE	FALSE	TRUE	TRUE	TRUE
8494AN4	74451028		TRUE	2237867	1	2237867	0	TRUE	FALSE	TRUE	TRUE	TRUE
8494AN8	118622997		TRUE	2149454	1	2149454	0	TRUE	FALSE	TRUE	TRUE	TRUE
8494DM1	45196286		FALSE	1976778	26	429874		FALSE	TRUE	TRUE	FALSE - mixed culture
8494DM3	43801065		FALSE	2132166	16	589834		FALSE	TRUE	TRUE	TRUE	TRUE
8494DM5	261014923		TRUE	4476426	3	2218017	2258409	TRUE - mixed culture	TRUE	FALSE
8494DM6	99615695		TRUE	4140547	91	2026560	2113987	TRUE - mixed culture	TRUE	FALSE
8496OA5	147563424		TRUE	2482115	1	2482115	0	TRUE	FALSE	TRUE	TRUE	TRUE
8497AN2.2	99498634		TRUE	2309314	24	2261878	47436	TRUE - likely non-chrom contam	FALSE	FALSE
8497AN4	22084959		FALSE	1597926	154	70117		FALSE	TRUE	TRUE	TRUE	TRUE
8497AN5	80872184		FALSE	2487509	21	433575		FALSE	FALSE	FALSE
8497AN6.1	176461784		TRUE	2304941	2	2253498	51443	TRUE	FALSE	TRUE	TRUE	TRUE
8497AN7	181032692		TRUE	2099229	1	2099229	0	TRUE	FALSE	TRUE	TRUE	TRUE
8497AN8	173757975		FALSE	4566546	246	370127		FALSE	FALSE	FALSE
8497OA1	30465587		FALSE	2677601	302	72689		FALSE	FALSE	FALSE
8497OA7	52770727		FALSE	2291823	35	311005		FALSE	TRUE	TRUE	TRUE	TRUE
8497OA8	10382277		FALSE	408685	70	27515		FALSE	TRUE	TRUE	TRUE	TRUE
8498AN13	461734730		TRUE	5040855	5	5006486	34369	TRUE	FALSE	TRUE	TRUE	TRUE
8498AN14.3	24050374		FALSE	1850974	11	427984		FALSE	TRUE	TRUE	TRUE	TRUE
8498AN8	424367368		TRUE	2041157	1	2041157	0	TRUE	FALSE	TRUE	TRUE	TRUE
8498DM2	2006663	Under 10MB	#N/A	1204352	127	53702		FALSE	TRUE	TRUE	TRUE	TRUE
8498DM3	18307518		FALSE	1802965	107	100127		FALSE	TRUE	TRUE	TRUE	TRUE
8498DM4	93225641		FALSE	2042628	26	336853		FALSE	TRUE	TRUE	TRUE	TRUE
8498DM5	37639148		FALSE	3177361	125	187028		FALSE	FALSE	FALSE
8498OA3	7015353	Under 10MB	#N/A	2404217	96	70222		FALSE	FALSE	FALSE
8498OA7	10910505		FALSE	210963	41	18088		FALSE	FALSE	FALSE
8498OA8	36666840		FALSE	4044133	280	188380		FALSE	TRUE	TRUE	FALSE - mixed culture
8498OA9	13317412		FALSE	1617414	118	77961		FALSE	TRUE	TRUE	TRUE	TRUE
8507AN12	28554069		FALSE	2300843	86	200841		FALSE	FALSE	FALSE
8507AN13	15220560		FALSE	1885461	64	95331		FALSE	TRUE	TRUE	TRUE	TRUE
8507AN2.2	53153827		FALSE	3655249	193	182973		FALSE	FALSE	FALSE
8507AN4	No LR								TRUE	TRUE	FALSE - mixed culture
8507AN4.1	60712886		FALSE	2497789	149	127282		FALSE	FALSE	FALSE
8507AN4.2	151705174		FALSE	2513597	36	1235449		FALSE	FALSE	FALSE
8507AN6.1	38320767		FALSE	1872072	65	192727		FALSE	FALSE	FALSE
8507AN7	398623708		TRUE	1842047	1	1842047	0	TRUE	TRUE	TRUE
8507K1	290808223		TRUE	5165023	4	5004907	160116	TRUE	FALSE	TRUE	TRUE	TRUE
8507K2	54728845		FALSE	2011669	19	717213		FALSE	TRUE	TRUE	TRUE	TRUE
8507K3	75913835		FALSE	1990886	6	1073714		FALSE	TRUE	TRUE	TRUE	TRUE
8507OA1	22087550		FALSE	1956312	99	82356		FALSE	FALSE	FALSE
8507OA3	46817584		TRUE	2465409	1	2465409	0	TRUE	FALSE	TRUE	TRUE	TRUE
8507OA5	97980751		FALSE	2133323	8	978584		FALSE	TRUE	TRUE	TRUE	TRUE
8507OA7	32795419		FALSE	2588534	27	363674		FALSE	FALSE	FALSE
8507OAN12	38146557		FALSE	2448958	23	448426		FALSE	TRUE	TRUE	TRUE	TRUE
8511A1	18307511		FALSE	2107885	190	66180		FALSE	TRUE	TRUE	FALSE - mixed culture
8511A2	22671240		FALSE	2672970	149	123880		FALSE	FALSE	FALSE
8511A3	50867897		TRUE	2223146	3	1959397	263749	TRUE	TRUE	TRUE	TRUE	TRUE
8511A4	18318466		FALSE	2275302	56	223800		FALSE	FALSE	FALSE
8511A7	76503328		TRUE	2189598	2	2184823	4775	TRUE	TRUE	TRUE	TRUE	TRUE
8511A8	69099743		FALSE	2065980	21	239310		FALSE	TRUE	TRUE	TRUE	TRUE
8511AK2	79071350		FALSE	6258743	56	1009511		FALSE	FALSE	FALSE
8511AN1	14809882		FALSE	1658525	37	150857		FALSE	FALSE	FALSE
8511AN10	1819712	Under 10MB	#N/A	4481780	646	50113		FALSE	FALSE	FALSE
8511AN11	No LR								TRUE	TRUE	TRUE	TRUE
8511AN14	14439723		FALSE	1328566	70	49449		FALSE	FALSE	FALSE
8511AN15	78888244		FALSE	5666394	167	529280		FALSE	FALSE	FALSE
8511AN16	55595449		FALSE	4045524	72	669235		FALSE	FALSE	FALSE
8511AN2	3757756	Under 10MB	#N/A	2450356	254	59488		FALSE	FALSE	FALSE
8511AN3	48897185		TRUE	2047341	2	2046182	1159	TRUE	TRUE	TRUE	TRUE	TRUE
8511AN4	42628568		FALSE	2046684	4	1068171		FALSE	TRUE	TRUE	TRUE	TRUE
8511AN5	59547967		FALSE	4915241	87	338600		FALSE	FALSE	FALSE
8511AN6	10595634		FALSE	358090	83	10266		FALSE	FALSE	FALSE
8511AN7	56040501		FALSE	1998303	47	293774		FALSE	TRUE	TRUE	TRUE	TRUE
8511AN8	14595853		FALSE	1561636	109	106513		FALSE	FALSE - SR but failed (no reads	FALSE
8511AN9	12466163		FALSE	873396	44	53681		FALSE	FALSE	FALSE
8511ANK2	34510155		FALSE	121074	24	22693		FALSE	FALSE	FALSE
8511ANK3	14194161	Tiny assembly	#N/A	1934145	88	113232		FALSE	FALSE	FALSE
8511ANK4	7143917	Under 10MB	#N/A	2677601	302	72689		FALSE	FALSE	FALSE
8511AS2	182786075		TRUE	2453924	4	2426233	27691	TRUE	FALSE	TRUE	TRUE	TRUE
8511AS3	37561775	Tiny assembly	#N/A	2030384	52	403717		FALSE	FALSE	FALSE
8511AS4	56552816		FALSE	2424825	38	389611		FALSE	FALSE	FALSE
8511K2	69772475		FALSE	5927563	48	495658		FALSE	FALSE	FALSE
8512A1	13685062		FALSE	1680336	73	94813		FALSE	FALSE	FALSE
8512A2	14137837		FALSE	1128980	54	69236		FALSE	FALSE	FALSE
8512A3	16882557		FALSE	1934145	88	113232		FALSE	FALSE	FALSE
8512A4	20296663		FALSE	2384365	34	357796		FALSE	FALSE	FALSE
8512A5	4369548	Under 10MB	#N/A	2107885	190	66180		FALSE	FALSE	FALSE
8512A6	360434228		TRUE	2123509	2	2115109	8400	TRUE	TRUE	TRUE
8512A6.1	244304133		TRUE	2123476	2	2115082	8394	TRUE	FALSE	TRUE	TRUE	TRUE
8512A6.2	613492491		TRUE	2123741	2	2115336	8405	TRUE	FALSE	TRUE	TRUE	TRUE
8512A7	117658624		TRUE	2483519	1	2483519	0	TRUE	FALSE	TRUE	TRUE	TRUE
8512A8	17551369		FALSE	1504888	184	62774		FALSE	TRUE	TRUE	TRUE	TRUE
8512AN1	79895310		FALSE	2450356	254	59488		FALSE	FALSE	FALSE
8512AN10	31942411		FALSE	1991169	2	1217702		FALSE	TRUE	TRUE	TRUE	TRUE
8512AN11	2394599	Under 10MB	#N/A	1435190	125	56352		FALSE	FALSE	FALSE
8512AN2	106094946		TRUE	1941002	1	1941002	0	TRUE	TRUE	TRUE	TRUE	TRUE
8512AN3	88597616		TRUE	1944149	1	1944149	0	TRUE	TRUE	TRUE	TRUE	TRUE
8512AN4	72562881		TRUE	1994580	1	1994580	0	TRUE	TRUE	TRUE	TRUE	TRUE
8512AN5	17986571		FALSE	2112709	122	222356		FALSE	FALSE	FALSE
8512AN6	8416918	Under 10MB	#N/A	1956312	99	82356		FALSE	FALSE	FALSE
8512AN7	292444135		FALSE	4406367	164	1241886		FALSE	FALSE	FALSE
8512AN8	16535809		FALSE	2054909	65	196248		FALSE	FALSE	FALSE
8512DM1	No LR								TRUE	TRUE	TRUE	TRUE
8512DM2	243812592		TRUE	5319922	1	5319922	0	TRUE	TRUE	TRUE	TRUE	TRUE
8512DM3	4243503	Under 10MB	#N/A	1504888	184	62774		FALSE	TRUE	TRUE	FALSE - mixed culture
8512DM4	69668112		FALSE	2250983	130	93261		FALSE	TRUE	TRUE	FALSE - mixed culture
8512DM5	84005576		TRUE	2818636	1	2818636	0	TRUE	TRUE	TRUE	TRUE	TRUE
8512DM6	35054191		FALSE	2707467	40	368601		FALSE	TRUE	TRUE	FALSE - mixed culture
8512DM7	40201035		FALSE	2408557	90	464392		FALSE	TRUE	TRUE	FALSE - mixed culture
8512K2	39313175		FALSE	2762051	109	176683		FALSE	FALSE	FALSE
8512K3	308349986		TRUE	2504645	2	2502485	2160	TRUE	FALSE	TRUE	TRUE	TRUE
8512K4	78498726		TRUE	2504081	2	2501920	2161	TRUE	FALSE	TRUE	TRUE	TRUE
8512K6	84740427		FALSE	2789902	40	684541		FALSE	FALSE	FALSE
8512K7	99814319		TRUE	2504824	2	2502663	2161	TRUE	FALSE	TRUE	TRUE	TRUE
8512M1	80131659		FALSE	5322249	183	418779		FALSE	FALSE	FALSE
8512SHA1	105545287		TRUE	2504825	2	2502664	2161	TRUE	FALSE	TRUE	TRUE	TRUE
8512SHA2	35037295		FALSE	2512130	7	1066631		FALSE	FALSE	FALSE
8513A10	83249069		FALSE	2153902	89	104717		FALSE	TRUE	TRUE	TRUE	TRUE
8513A11	52958072		FALSE	1855609	128	112971		FALSE	TRUE	TRUE	TRUE	TRUE
8513A12	30432579		FALSE	1903079	16	380914		FALSE	TRUE	TRUE	TRUE	TRUE
8513A2.2	70370576		FALSE	2290150	22	477013		FALSE	FALSE	FALSE
8513A4	68568399		FALSE	1995669	13	565256		FALSE	TRUE	TRUE	TRUE	TRUE
8513A5.1	45572527		FALSE	3128059	7	780579		FALSE	FALSE	FALSE
8513A7	152077890		TRUE	2005016	1	2005016	0	TRUE	TRUE	TRUE	TRUE	TRUE
8513A8.1	11983603		FALSE	508305	114	19448		FALSE	FALSE	FALSE
8513A9	122851036		FALSE	2029314	5	1260377		FALSE	TRUE	TRUE	TRUE	TRUE
8513AN10.3	42891139		FALSE	1887541	45	317444		FALSE	TRUE	TRUE	TRUE	TRUE
8513AN2	301317862		TRUE	2149378	1	2149378	0	TRUE	FALSE	TRUE	TRUE	TRUE
8513AN3	34354715		FALSE	3204035	13	519219		FALSE	FALSE	FALSE
8513AN5	126921945		FALSE	6396679	248	509151		FALSE	FALSE	FALSE
8513AN6	57435351		FALSE	1900097	5	924404		FALSE	TRUE	TRUE	TRUE	TRUE
8513AN9.2	52165759		TRUE	1929592	16	1574494	355098	FALSE	TRUE	TRUE	TRUE	TRUE
8513K1	71604531		FALSE	6857415	83	884403		FALSE	FALSE	FALSE
8513K2	12725015		FALSE	529330	76	41064		FALSE	FALSE	FALSE
8513K3	14607810		FALSE	702939	75	41650		FALSE	FALSE	FALSE
8513K5	21586133		FALSE	1893610	190	55009		FALSE	TRUE	TRUE	FALSE - mixed culture
8514A1	76003417		TRUE	2348969	8	2252101	96868	TRUE - likely non-chrom contam	FALSE	FALSE
8514A10	109716535		TRUE	2070224	3	1932259	137965	TRUE	TRUE	TRUE	TRUE	TRUE
8514A11	57147381		FALSE	1850072	29	251601		FALSE	TRUE	TRUE	TRUE	TRUE
8514A2	109519342		TRUE	1905012	2	1903559	1453	TRUE	TRUE	TRUE
8514A3	174851325		TRUE	2247711	1	2247711	0	TRUE	FALSE	TRUE	TRUE	TRUE
8514A4	64085851		FALSE	3289769	197	327737		FALSE	TRUE	TRUE	TRUE	TRUE
8514A5	205209913		TRUE	4231766	8	2249730	1982036	TRUE - mixed culture	TRUE	FALSE
8514A6	40930839		FALSE	1996007	136	91750		FALSE	TRUE	TRUE	TRUE	TRUE
8514A7	150793746		TRUE	2219720	2	2215704	4016	TRUE	TRUE	TRUE	TRUE	TRUE
8514A8	76057010		FALSE	2262402	40	444650		FALSE	TRUE	TRUE	TRUE	TRUE
8514A9	62586616		FALSE	2353108	12	996332		FALSE	TRUE	TRUE	TRUE	TRUE
8514AN3	106485267		FALSE	1903556	6	722050		FALSE	TRUE	TRUE	TRUE	TRUE
8514AN5.1	83332681		FALSE	2065719	14	830546		FALSE	FALSE	FALSE
8514AN6	40745685		FALSE	3348604	287	135565		FALSE	FALSE	FALSE
8514AN7	72849697		FALSE	2327103	25	341060		FALSE	FALSE	FALSE
8514K1	93652033		TRUE	3038451	1	3038451	0	TRUE	FALSE	TRUE	TRUE	TRUE
8515A1	83544377		TRUE	2771544	1	2771544	0	TRUE	FALSE	TRUE	TRUE	TRUE
8515A2	50128184		FALSE	2788710	36	640605		FALSE	FALSE	FALSE
8515A3	40739508		FALSE	4313486	555	34526		FALSE	FALSE	FALSE
8515A4	34263938		FALSE	3946440	503	58242		FALSE	FALSE	FALSE
8515A5	23912487		FALSE	1741093	307	28040		FALSE	FALSE	FALSE
8515A8	76681501		TRUE	1995322	1	1995322	0	TRUE	FALSE	TRUE	TRUE	TRUE
8515A9	148257175		FALSE	7064102	166	735529		FALSE	TRUE	TRUE	FALSE - mixed culture
8515an1	81053269		FALSE	4818449	52	506106		FALSE	FALSE	FALSE
8515AN11	47771175		FALSE	2038032	7	1088898		FALSE	TRUE	TRUE	TRUE	TRUE
8515AN14	67749438		TRUE	2303840	4	1828201	475639	FALSE	TRUE	TRUE	TRUE	TRUE
8515AN4	86432474		FALSE	3084863	117	1143670		FALSE	TRUE	TRUE	FALSE - mixed culture
8515AN6	No LR								TRUE	TRUE	TRUE	TRUE
8515ANT1	56371800		FALSE	3187615	659	30653		FALSE	TRUE	TRUE	TRUE	TRUE
8515ANT3	67006829		FALSE	4942571	300	141300		FALSE	TRUE	TRUE	TRUE	TRUE
8524A1	351873833		TRUE	5230775	5	3432906	1797869	FALSE	FALSE	FALSE
8524A10	53507421		FALSE	1959714	5	738951		FALSE	TRUE	TRUE	TRUE	TRUE
8524A2	24372620		FALSE	1925532	287	37791		FALSE	FALSE	FALSE
8524A4	23555344		FALSE	1546991	135	57303		FALSE	TRUE	TRUE	TRUE	FALSE - mixed culture
8524A6	151855356		TRUE	5956114	25	1975448	3980666	FALSE	FALSE	FALSE
8524A7	120665373		TRUE	5167438	9	1980696	3186742	FALSE	FALSE	FALSE
8524A8	30292991		FALSE	2461764	24	366319		FALSE	FALSE	FALSE
8524A9	27410148		FALSE	1975824	42	253142		FALSE	TRUE	TRUE	FALSE - mixed culture
8524AN2	239427583		TRUE	5163037	8	3262268	1900769	FALSE	FALSE	FALSE
8524AN3	25310704		FALSE	1097088	145	61482		FALSE	FALSE	FALSE
8524AN5	44404210		FALSE	1984364	24	562112		FALSE	TRUE	TRUE	TRUE	TRUE
8524AN6	75326680		TRUE	1942882	1	1942882	0	TRUE	TRUE	TRUE	TRUE	TRUE
8524AN7	178872086		TRUE	5776148	36	1637606	4138542	FALSE	FALSE	FALSE
8524AN8	9951752	Under 10MB	#N/A	1996007	136	91750		FALSE	TRUE	TRUE	TRUE	TRUE
8524K1	79622852		FALSE	5240326	17	1192507		FALSE	FALSE	FALSE
8524K2	168207780		TRUE	3537792	2	3515907	21885	TRUE	FALSE	TRUE	TRUE	TRUE
8524K4	198152015		TRUE	5200006	7	1648899	3551107	FALSE	FALSE	FALSE
8524M1	15252069		FALSE	738509	70	36271		FALSE	FALSE	FALSE
8524M2	18737263		FALSE	808602	53	59130		FALSE	FALSE	FALSE
8524M3	126679692		TRUE	5168278	33	1979741	3188537	FALSE	FALSE	FALSE
8524M4	115803339		FALSE	7500014	137	749866		FALSE	FALSE	FALSE
8524M5	2805031	Under 10MB	#N/A	3946440	503	58242		FALSE	FALSE	FALSE
8524M6	560554	Under 10MB	#N/A	408685	70	27515		FALSE	FALSE	FALSE
8543A1	31551308		FALSE	2468568	127	130840		FALSE	TRUE	TRUE	FALSE - mixed culture
8543A2	17563713		FALSE	2404217	96	70222		FALSE	FALSE	FALSE
8543A7	40223620		FALSE	1996028	36	390964		FALSE	TRUE	TRUE	TRUE	TRUE
8543AN1	78117577		TRUE	2016064	1	2016064	0	TRUE	TRUE	TRUE	TRUE	TRUE
8543AN4	64662605		TRUE	1859389	1	1859389	0	TRUE	TRUE	TRUE	TRUE	TRUE
8606A1	36898472		FALSE	2639654	23	432752		FALSE	FALSE	FALSE
8606A2	1979126	Under 10MB	#N/A	873396	44	53681		FALSE	FALSE	FALSE
8606A7-2	9912492	Under 10MB	#N/A	2095526	147	87078		FALSE	FALSE	FALSE
8606AN2	88197954		FALSE	1948429	24	330683		FALSE	FALSE	FALSE
8606AN6	252117685		FALSE	4054573	22	1490026		FALSE	FALSE	FALSE
8607A1	80443573		TRUE	4118714	51	1685192	2433522	FALSE	FALSE	FALSE
8607AN1.1	45215409		FALSE	1962263	225	53558		FALSE	FALSE	FALSE
8607AN1.1-2	297253453		FALSE	2466717	3	1444419		FALSE	FALSE	FALSE
8607AN1.2	103863532		TRUE	2449559	1	2449559	0	TRUE	FALSE	TRUE	TRUE	TRUE
8607AN2	73810303		TRUE	2167293	1	2167293	0	TRUE	TRUE	TRUE
8607AN3	67029049		TRUE	2167376	1	2167376	0	TRUE	TRUE	TRUE	TRUE	TRUE
8633AN2	76450008		TRUE	1953137	1	1953137	0	TRUE	TRUE	TRUE	TRUE	TRUE
8633AN4	34313973		FALSE	2202789	14	785647		FALSE	TRUE	TRUE	TRUE	TRUE
8633TD2	112208288		TRUE	2539689	2	2534801	4888	TRUE	FALSE	TRUE	TRUE	TRUE
8633TD4	7318097	Under 10MB	#N/A	2271866	259	75599		FALSE	FALSE	FALSE
8633TD5	57894683		FALSE	2376881	23	397263		FALSE	TRUE	TRUE	TRUE	TRUE
8633TD6	98659663		TRUE	3460343	3	2534421	925922	FALSE	FALSE	FALSE
8633TD8	5026942	Under 10MB	#N/A	1597926	154	70117		FALSE	FALSE	FALSE
8676A1	15474594		FALSE	2250195	78	140595		FALSE	FALSE - SR but failed (no reads	FALSE
8676A2	3773660	Under 10MB	#N/A	1097088	145	61482		FALSE	FALSE	FALSE
8676A3	51824439		FALSE	2240055	62	302041		FALSE	TRUE	TRUE	TRUE	TRUE
8676A4	57642638		FALSE	1924863	141	103576		FALSE	TRUE	TRUE	TRUE	TRUE
8676A5	115859237		FALSE	7004503	198	953675		FALSE	FALSE	FALSE
8676A6	38919188		FALSE	1947772	20	385864		FALSE	TRUE	TRUE	FALSE - mixed culture
8676A7	73732009		FALSE	2197369	14	423689		FALSE	TRUE	TRUE	TRUE	TRUE
8676A9	1769342	Under 10MB	#N/A	1328566	70	49449		FALSE	FALSE	FALSE
8676AN2	239015	Under 10MB	#N/A	210963	41	18088		FALSE	FALSE	FALSE
8676AN3	196703811		TRUE	2122186	1	2122186	0	TRUE	FALSE	TRUE	TRUE	TRUE
8676AN4	42275648		FALSE	2029755	38	322140		FALSE	FALSE	FALSE
8676AN5	38156586		FALSE	1958398	19	346753		FALSE	TRUE	TRUE	TRUE	TRUE
8676AN8	39151669		FALSE	2218662	6	820506		FALSE	TRUE	TRUE	TRUE	TRUE
8676OA1	37412954		FALSE	3120898	78	297804		FALSE	FALSE	FALSE
8691A1	69387320		TRUE	4570259	15	3025055	1545204	FALSE	FALSE	FALSE
8691A3	39039248		FALSE	2196115	13	369406		FALSE	FALSE	FALSE
8691A9	15698752		FALSE	1435190	125	56352		FALSE	FALSE	FALSE
8691AN1	230067345		TRUE	2028049	2	2024793	3256	TRUE	FALSE	TRUE	TRUE	TRUE
8691AN2	28996855		FALSE	2194917	27	287119		FALSE	TRUE	TRUE	TRUE	TRUE
8691DM1	20831541		FALSE	2573440	90	115509		FALSE	TRUE	TRUE	TRUE	TRUE
8691DM2	1105150	Under 10MB	#N/A	738509	70	36271		FALSE	FALSE	FALSE
8691DM4	118108633		TRUE	1949212	2	1913994	35218	TRUE	TRUE	TRUE	TRUE	TRUE
8691DM5	42294293		FALSE	2177532	160	99414		FALSE	TRUE	TRUE	FALSE - mixed culture
8691DM7	4399731	Under 10MB	#N/A	2738502	236	66687		FALSE	TRUE	TRUE	TRUE	TRUE
8691DM8	1537684	Under 10MB	#N/A	1529116	187	42688		FALSE	FALSE	FALSE
8691OA9	No LR								TRUE	TRUE	TRUE	TRUE

## Sheet: Whole_gene
Supplementary Table 4: List of bacterial isolates subjected to Oxford Nanopore whole-genome sequencing
isolate_id	classification
8305AN2	d__Bacteria;p__Bacillota;c__Bacilli;o__Lactobacillales;f__Streptococcaceae;g__Streptococcus;s__
8305AN3	d__Bacteria;p__Bacillota;c__Bacilli;o__Lactobacillales;f__Streptococcaceae;g__Streptococcus;s__
8305AN4	d__Bacteria;p__Bacillota;c__Bacilli;o__Lactobacillales;f__Streptococcaceae;g__Streptococcus;s__
8305OA1	d__Bacteria;p__Actinomycetota;c__Actinomycetes;o__Actinomycetales;f__Micrococcaceae;g__Rothia;s__Rothia mucilaginosa
8305OA4	d__Bacteria;p__Bacillota;c__Bacilli;o__Lactobacillales;f__Streptococcaceae;g__Streptococcus;s__
8305OAN3	d__Bacteria;p__Bacillota;c__Bacilli;o__Lactobacillales;f__Streptococcaceae;g__Streptococcus;s__
8324AN10	d__Bacteria;p__Pseudomonadota;c__Gammaproteobacteria;o__Enterobacterales;f__Enterobacteriaceae;g__Escherichia;s__Escherichia coli
8324AN5	d__Bacteria;p__Pseudomonadota;c__Gammaproteobacteria;o__Enterobacterales;f__Enterobacteriaceae;g__Escherichia;s__Escherichia coli
8324OA8	d__Bacteria;p__Bacillota;c__Bacilli;o__Lactobacillales;f__Streptococcaceae;g__Streptococcus;s__
8324OAN8	d__Bacteria;p__Bacillota;c__Bacilli;o__Lactobacillales;f__Streptococcaceae;g__Streptococcus;s__Streptococcus parasanguinis_B
8324OAN9	d__Bacteria;p__Pseudomonadota;c__Gammaproteobacteria;o__Enterobacterales;f__Enterobacteriaceae;g__Escherichia;s__Escherichia coli
8337AN2	d__Bacteria;p__Pseudomonadota;c__Gammaproteobacteria;o__Enterobacterales;f__Enterobacteriaceae;g__Escherichia;s__Escherichia coli
8355A1	d__Bacteria;p__Bacillota;c__Bacilli;o__Lactobacillales;f__Streptococcaceae;g__Streptococcus;s__Streptococcus salivarius_D
8355A3	d__Bacteria;p__Pseudomonadota;c__Gammaproteobacteria;o__Burkholderiales;f__Neisseriaceae;g__Neisseria;s__Neisseria flavescens_B
8355A6	d__Bacteria;p__Bacillota;c__Bacilli;o__Lactobacillales;f__Streptococcaceae;g__Streptococcus;s__Streptococcus salivarius_D
8355AN1	d__Bacteria;p__Bacillota;c__Bacilli;o__Lactobacillales;f__Streptococcaceae;g__Streptococcus;s__Streptococcus infantis_F
8355AN2	d__Bacteria;p__Bacillota;c__Bacilli;o__Lactobacillales;f__Streptococcaceae;g__Streptococcus;s__Streptococcus salivarius_D
8389AN2	d__Bacteria;p__Bacillota;c__Bacilli;o__Staphylococcales;f__Staphylococcaceae;g__Staphylococcus;s__Staphylococcus aureus
8389DM2	d__Bacteria;p__Bacillota;c__Bacilli;o__Staphylococcales;f__Staphylococcaceae;g__Staphylococcus;s__Staphylococcus aureus
8389DM3	d__Bacteria;p__Bacteroidota;c__Bacteroidia;o__Bacteroidales;f__Bacteroidaceae;g__Prevotella;s__
8389DM5	d__Bacteria;p__Bacteroidota;c__Bacteroidia;o__Bacteroidales;f__Bacteroidaceae;g__Prevotella;s__
8389DM6	d__Bacteria;p__Bacillota_A;c__Clostridia;o__Peptostreptococcales;f__Peptostreptococcaceae;g__Peptostreptococcus;s__Peptostreptococcus anaerobius
8389O2	d__Bacteria;p__Pseudomonadota;c__Gammaproteobacteria;o__Enterobacterales;f__Enterobacteriaceae;g__Escherichia;s__Escherichia coli
8389O4	d__Bacteria;p__Bacillota;c__Bacilli;o__Lactobacillales;f__Streptococcaceae;g__Streptococcus;s__Streptococcus sp013394695
8389S2	d__Bacteria;p__Bacillota;c__Bacilli;o__Lactobacillales;f__Streptococcaceae;g__Streptococcus;s__Streptococcus oralis_AC
8389S5	d__Bacteria;p__Bacillota;c__Bacilli;o__Staphylococcales;f__Staphylococcaceae;g__Staphylococcus;s__Staphylococcus aureus
8389SA4	d__Bacteria;p__Bacillota;c__Bacilli;o__Lactobacillales;f__Streptococcaceae;g__Streptococcus;s__Streptococcus sp001556435
8408OA3	d__Bacteria;p__Bacillota;c__Bacilli;o__Lactobacillales;f__Streptococcaceae;g__Streptococcus;s__Streptococcus parasanguinis_D
8420OA2	d__Bacteria;p__Bacillota;c__Bacilli;o__Lactobacillales;f__Streptococcaceae;g__Streptococcus;s__Streptococcus oralis_S
8420OA3	d__Bacteria;p__Bacillota;c__Bacilli;o__Lactobacillales;f__Streptococcaceae;g__Streptococcus;s__Streptococcus hominis
8421A4	d__Bacteria;p__Bacillota;c__Bacilli;o__Lactobacillales;f__Streptococcaceae;g__Streptococcus;s__Streptococcus parasanguinis_D
8421OA3	d__Bacteria;p__Bacillota;c__Bacilli;o__Lactobacillales;f__Streptococcaceae;g__Streptococcus;s__Streptococcus salivarius
8431AN1	d__Bacteria;p__Bacillota;c__Bacilli;o__Lactobacillales;f__Streptococcaceae;g__Streptococcus;s__Streptococcus mitis
8431AN6	d__Bacteria;p__Bacillota;c__Bacilli;o__Lactobacillales;f__Streptococcaceae;g__Streptococcus;s__
8451AG2	d__Bacteria;p__Bacillota;c__Bacilli;o__Lactobacillales;f__Streptococcaceae;g__Streptococcus;s__Streptococcus infantis_I
8451AN7	d__Bacteria;p__Actinomycetota;c__Actinomycetes;o__Actinomycetales;f__Actinomycetaceae;g__Pauljensenia;s__Pauljensenia sp000185285
8451ANG1	d__Bacteria;p__Bacillota;c__Bacilli;o__Lactobacillales;f__Streptococcaceae;g__Streptococcus;s__Streptococcus gordonii
8451ANG2	d__Bacteria;p__Bacillota;c__Bacilli;o__Lactobacillales;f__Streptococcaceae;g__Streptococcus;s__Streptococcus gordonii
8451ANG5	d__Bacteria;p__Bacillota;c__Bacilli;o__Lactobacillales;f__Streptococcaceae;g__Streptococcus;s__Streptococcus gordonii
8451ANG6	d__Bacteria;p__Bacillota;c__Bacilli;o__Lactobacillales;f__Streptococcaceae;g__Streptococcus;s__Streptococcus hominis
8451ANT1	d__Bacteria;p__Bacillota;c__Bacilli;o__Lactobacillales;f__Streptococcaceae;g__Streptococcus;s__
8451ANT4	d__Bacteria;p__Bacillota;c__Bacilli;o__Lactobacillales;f__Streptococcaceae;g__Streptococcus;s__Streptococcus infantis_M
8451AT1	d__Bacteria;p__Pseudomonadota;c__Gammaproteobacteria;o__Burkholderiales;f__Neisseriaceae;g__Neisseria;s__Neisseria perflava
8451AT4	d__Bacteria;p__Bacillota;c__Bacilli;o__Lactobacillales;f__Streptococcaceae;g__Streptococcus;s__Streptococcus gordonii
8451AT5	d__Bacteria;p__Bacillota;c__Bacilli;o__Lactobacillales;f__Streptococcaceae;g__Streptococcus;s__Streptococcus infantis_I
8451AT6	d__Bacteria;p__Bacillota;c__Bacilli;o__Lactobacillales;f__Streptococcaceae;g__Streptococcus;s__Streptococcus infantis_M
8451AT7	d__Bacteria;p__Bacillota;c__Bacilli;o__Lactobacillales;f__Streptococcaceae;g__Streptococcus;s__Streptococcus sanguinis_O
8451AT8	d__Bacteria;p__Bacillota;c__Bacilli;o__Lactobacillales;f__Streptococcaceae;g__Streptococcus;s__
8451DM1	d__Bacteria;p__Bacillota;c__Bacilli;o__Staphylococcales;f__Staphylococcaceae;g__Staphylococcus;s__Staphylococcus aureus
8451DM10	d__Bacteria;p__Bacillota;c__Bacilli;o__Lactobacillales;f__Streptococcaceae;g__Streptococcus;s__Streptococcus hominis
8451DM12	d__Bacteria;p__Bacillota;c__Bacilli;o__Lactobacillales;f__Streptococcaceae;g__Streptococcus;s__Streptococcus gordonii
8451DM13	d__Bacteria;p__Bacillota;c__Bacilli;o__Lactobacillales;f__Streptococcaceae;g__Streptococcus;s__Streptococcus gordonii
8451DM14	d__Bacteria;p__Bacillota;c__Bacilli;o__Staphylococcales;f__Gemellaceae;g__Gemella;s__Gemella haemolysans_A
8451DM15	d__Bacteria;p__Bacillota;c__Bacilli;o__Staphylococcales;f__Staphylococcaceae;g__Staphylococcus;s__Staphylococcus aureus
8451DM4	d__Bacteria;p__Bacillota;c__Bacilli;o__Lactobacillales;f__Streptococcaceae;g__Streptococcus;s__Streptococcus oralis
8451DM8	d__Bacteria;p__Bacillota;c__Bacilli;o__Lactobacillales;f__Streptococcaceae;g__Streptococcus;s__Streptococcus hominis
8451DM9	d__Bacteria;p__Bacillota;c__Bacilli;o__Lactobacillales;f__Streptococcaceae;g__Streptococcus;s__Streptococcus mitis
8457ANT31	d__Bacteria;p__Actinomycetota;c__Actinomycetes;o__Actinomycetales;f__Actinomycetaceae;g__Pauljensenia;s__Pauljensenia sp927911615
8457AT2	d__Bacteria;p__Bacillota;c__Bacilli;o__Lactobacillales;f__Streptococcaceae;g__Streptococcus;s__Streptococcus salivarius
8457OAN1	d__Bacteria;p__Bacillota;c__Bacilli;o__Lactobacillales;f__Streptococcaceae;g__Streptococcus;s__Streptococcus sp002238115
8457OAN3	d__Bacteria;p__Bacillota;c__Bacilli;o__Lactobacillales;f__Streptococcaceae;g__Streptococcus;s__Streptococcus infantis_F
8457OAN4	d__Bacteria;p__Bacillota;c__Bacilli;o__Lactobacillales;f__Streptococcaceae;g__Streptococcus;s__Streptococcus infantis_F
8462T1	d__Bacteria;p__Pseudomonadota;c__Gammaproteobacteria;o__Enterobacterales;f__Enterobacteriaceae;g__Enterobacter;s__Enterobacter hormaechei_B
8468T2	d__Bacteria;p__Bacillota;c__Bacilli;o__Lactobacillales;f__Streptococcaceae;g__Streptococcus;s__
8468AN4	d__Bacteria;p__Bacillota;c__Bacilli;o__Lactobacillales;f__Streptococcaceae;g__Streptococcus;s__Streptococcus rubneri
8468DM1	d__Bacteria;p__Pseudomonadota;c__Gammaproteobacteria;o__Enterobacterales;f__Enterobacteriaceae;g__Enterobacter;s__Enterobacter hormaechei_B
8468DM2	d__Bacteria;p__Bacillota;c__Bacilli;o__Lactobacillales;f__Streptococcaceae;g__Streptococcus;s__Streptococcus cristatus_J
8468DM31	d__Bacteria;p__Bacillota;c__Bacilli;o__Lactobacillales;f__Streptococcaceae;g__Streptococcus;s__
8468DM6	d__Bacteria;p__Bacillota_C;c__Negativicutes;o__Veillonellales;f__Veillonellaceae;g__Veillonella;s__Veillonella atypica
8468OAN1	d__Bacteria;p__Bacillota;c__Bacilli;o__Lactobacillales;f__Streptococcaceae;g__Streptococcus;s__Streptococcus xiaochunlingii
8468OAN3	d__Bacteria;p__Bacillota;c__Bacilli;o__Lactobacillales;f__Streptococcaceae;g__Streptococcus;s__Streptococcus infantis_I
8484A3	d__Bacteria;p__Bacillota;c__Bacilli;o__Lactobacillales;f__Streptococcaceae;g__Streptococcus;s__Streptococcus mitis_CD
8484A8	d__Bacteria;p__Bacillota;c__Bacilli;o__Lactobacillales;f__Streptococcaceae;g__Streptococcus;s__Streptococcus mitis_CD
8484AN1	d__Bacteria;p__Pseudomonadota;c__Gammaproteobacteria;o__Enterobacterales;f__Enterobacteriaceae;g__Enterobacter;s__Enterobacter hormaechei_B
8484AN2	d__Bacteria;p__Pseudomonadota;c__Gammaproteobacteria;o__Enterobacterales;f__Enterobacteriaceae;g__Enterobacter;s__Enterobacter hormaechei_B
8485A2	d__Bacteria;p__Bacillota;c__Bacilli;o__Lactobacillales;f__Streptococcaceae;g__Streptococcus;s__
8485A3	d__Bacteria;p__Bacillota;c__Bacilli;o__Staphylococcales;f__Staphylococcaceae;g__Staphylococcus;s__Staphylococcus epidermidis
8485A5	d__Bacteria;p__Bacillota;c__Bacilli;o__Staphylococcales;f__Staphylococcaceae;g__Staphylococcus;s__Staphylococcus epidermidis
8485AN1	d__Bacteria;p__Bacillota;c__Bacilli;o__Lactobacillales;f__Streptococcaceae;g__Streptococcus;s__Streptococcus hominis
8485AN10	d__Bacteria;p__Bacillota;c__Bacilli;o__Lactobacillales;f__Streptococcaceae;g__Streptococcus;s__Streptococcus hominis
8485AN4	d__Bacteria;p__Bacillota;c__Bacilli;o__Lactobacillales;f__Streptococcaceae;g__Streptococcus;s__Streptococcus sp901875575
8485DM1	d__Bacteria;p__Pseudomonadota;c__Gammaproteobacteria;o__Enterobacterales;f__Enterobacteriaceae;g__Enterobacter;s__Enterobacter hormaechei_B
8485DM2	d__Bacteria;p__Pseudomonadota;c__Gammaproteobacteria;o__Enterobacterales;f__Enterobacteriaceae;g__Enterobacter;s__Enterobacter hormaechei_B
8485DM3	d__Bacteria;p__Bacillota;c__Bacilli;o__Lactobacillales;f__Streptococcaceae;g__Streptococcus;s__Streptococcus parasanguinis_I
8485DM4	d__Bacteria;p__Bacillota;c__Bacilli;o__Lactobacillales;f__Streptococcaceae;g__Streptococcus;s__Streptococcus parasanguinis_I
8485DM5	d__Bacteria;p__Pseudomonadota;c__Gammaproteobacteria;o__Enterobacterales;f__Enterobacteriaceae;g__Enterobacter;s__Enterobacter hormaechei_B
8485DM6	d__Bacteria;p__Pseudomonadota;c__Gammaproteobacteria;o__Enterobacterales;f__Enterobacteriaceae;g__Enterobacter;s__Enterobacter hormaechei_B
8494AN11	d__Bacteria;p__Bacillota_C;c__Negativicutes;o__Veillonellales;f__Veillonellaceae;g__Veillonella;s__Veillonella parvula_A
8494AN3	d__Bacteria;p__Bacillota_C;c__Negativicutes;o__Veillonellales;f__Veillonellaceae;g__Veillonella;s__Veillonella parvula_A
8494AN4	d__Bacteria;p__Bacillota_C;c__Negativicutes;o__Veillonellales;f__Veillonellaceae;g__Veillonella;s__Veillonella nakazawae
8494AN8	d__Bacteria;p__Bacillota_C;c__Negativicutes;o__Veillonellales;f__Veillonellaceae;g__Veillonella;s__Veillonella parvula_A
8494DM3	d__Bacteria;p__Bacillota_C;c__Negativicutes;o__Veillonellales;f__Veillonellaceae;g__Veillonella;s__Veillonella hominis
8496OA5	d__Bacteria;p__Actinomycetota;c__Actinomycetes;o__Actinomycetales;f__Micrococcaceae;g__Rothia;s__Rothia dentocariosa
8497AN4	d__Bacteria;p__Bacillota;c__Bacilli;o__Lactobacillales;f__Streptococcaceae;g__Streptococcus;s__Streptococcus mitis_CY
8497AN6.1	d__Bacteria;p__Pseudomonadota;c__Gammaproteobacteria;o__Burkholderiales;f__Neisseriaceae;g__Eikenella;s__
8497AN7	d__Bacteria;p__Bacillota_C;c__Negativicutes;o__Veillonellales;f__Veillonellaceae;g__Veillonella;s__Veillonella parvula
8497OA7	d__Bacteria;p__Bacillota;c__Bacilli;o__Lactobacillales;f__Streptococcaceae;g__Streptococcus;s__Streptococcus salivarius_D
8497OA8	d__Bacteria;p__Bacillota;c__Bacilli;o__Lactobacillales;f__Streptococcaceae;g__Streptococcus;s__Streptococcus parasanguinis_D
8498AN13	d__Bacteria;p__Pseudomonadota;c__Gammaproteobacteria;o__Enterobacterales;f__Enterobacteriaceae;g__Enterobacter;s__Enterobacter hormaechei_B
8498AN14.3	d__Bacteria;p__Bacillota;c__Bacilli;o__Lactobacillales;f__Streptococcaceae;g__Streptococcus;s__Streptococcus mitis_CY
8498AN8	d__Bacteria;p__Bacillota;c__Bacilli;o__Lactobacillales;f__Streptococcaceae;g__Streptococcus;s__Streptococcus massiliensis
8498DM2	d__Bacteria;p__Bacillota;c__Bacilli;o__Staphylococcales;f__Gemellaceae;g__Gemella;s__Gemella sp002871655
8498DM3	d__Bacteria;p__Bacillota;c__Bacilli;o__Lactobacillales;f__Streptococcaceae;g__Streptococcus;s__Streptococcus massiliensis
8498DM4	d__Bacteria;p__Bacillota;c__Bacilli;o__Lactobacillales;f__Streptococcaceae;g__Streptococcus;s__Streptococcus massiliensis
8498OA9	d__Bacteria;p__Bacillota;c__Bacilli;o__Lactobacillales;f__Streptococcaceae;g__Streptococcus;s__Streptococcus oralis_C
8507AN13	d__Bacteria;p__Bacillota;c__Bacilli;o__Lactobacillales;f__Streptococcaceae;g__Streptococcus;s__
8507K1	d__Bacteria;p__Pseudomonadota;c__Gammaproteobacteria;o__Enterobacterales;f__Enterobacteriaceae;g__Enterobacter;s__Enterobacter hormaechei_B
8507K2	d__Bacteria;p__Bacillota;c__Bacilli;o__Lactobacillales;f__Streptococcaceae;g__Streptococcus;s__Streptococcus anginosus
8507K3	d__Bacteria;p__Bacillota;c__Bacilli;o__Lactobacillales;f__Streptococcaceae;g__Streptococcus;s__Streptococcus anginosus
8507OA3	d__Bacteria;p__Actinomycetota;c__Actinomycetes;o__Actinomycetales;f__Micrococcaceae;g__Rothia;s__Rothia dentocariosa
8507OA5	d__Bacteria;p__Bacillota;c__Bacilli;o__Lactobacillales;f__Streptococcaceae;g__Streptococcus;s__Streptococcus sp001813105
8507OAN12	d__Bacteria;p__Bacillota;c__Bacilli;o__Lactobacillales;f__Streptococcaceae;g__Streptococcus;s__
8511A3	d__Bacteria;p__Bacillota;c__Bacilli;o__Lactobacillales;f__Streptococcaceae;g__Streptococcus;s__Streptococcus salivarius_D
8511A7	d__Bacteria;p__Bacillota;c__Bacilli;o__Lactobacillales;f__Streptococcaceae;g__Streptococcus;s__Streptococcus parasanguinis
8511A8	d__Bacteria;p__Bacillota;c__Bacilli;o__Lactobacillales;f__Streptococcaceae;g__Streptococcus;s__Streptococcus oralis_BY
8511AN11	d__Bacteria;p__Bacillota;c__Bacilli;o__Lactobacillales;f__Streptococcaceae;g__Streptococcus;s__Streptococcus anginosus
8511AN3	d__Bacteria;p__Bacillota;c__Bacilli;o__Lactobacillales;f__Streptococcaceae;g__Streptococcus;s__Streptococcus hominis
8511AN4	d__Bacteria;p__Bacillota;c__Bacilli;o__Lactobacillales;f__Streptococcaceae;g__Streptococcus;s__Streptococcus hominis
8511AN7	d__Bacteria;p__Bacillota;c__Bacilli;o__Lactobacillales;f__Streptococcaceae;g__Streptococcus;s__Streptococcus hominis
8511AS2	d__Bacteria;p__Bacillota;c__Bacilli;o__Staphylococcales;f__Staphylococcaceae;g__Staphylococcus;s__Staphylococcus epidermidis
8512A6.1	d__Bacteria;p__Bacillota;c__Bacilli;o__Lactobacillales;f__Streptococcaceae;g__Streptococcus;s__Streptococcus parasanguinis_F
8512A6.2	d__Bacteria;p__Bacillota;c__Bacilli;o__Lactobacillales;f__Streptococcaceae;g__Streptococcus;s__Streptococcus parasanguinis_F
8512A7	d__Bacteria;p__Actinomycetota;c__Actinomycetes;o__Actinomycetales;f__Micrococcaceae;g__Rothia;s__Rothia dentocariosa
8512A8	d__Bacteria;p__Bacillota;c__Bacilli;o__Lactobacillales;f__Streptococcaceae;g__Streptococcus;s__Streptococcus mitis_BX
8512AN10	d__Bacteria;p__Bacillota;c__Bacilli;o__Lactobacillales;f__Streptococcaceae;g__Streptococcus;s__Streptococcus anginosus
8512AN2	d__Bacteria;p__Bacillota;c__Bacilli;o__Lactobacillales;f__Streptococcaceae;g__Streptococcus;s__Streptococcus anginosus
8512AN3	d__Bacteria;p__Bacillota;c__Bacilli;o__Lactobacillales;f__Streptococcaceae;g__Streptococcus;s__Streptococcus anginosus
8512AN4	d__Bacteria;p__Bacillota;c__Bacilli;o__Lactobacillales;f__Streptococcaceae;g__Streptococcus;s__Streptococcus anginosus
8512DM1	d__Bacteria;p__Bacillota;c__Bacilli;o__Lactobacillales;f__Streptococcaceae;g__Streptococcus;s__Streptococcus anginosus
8512DM2	d__Bacteria;p__Bacteroidota;c__Bacteroidia;o__Bacteroidales;f__Bacteroidaceae;g__Bacteroides;s__Bacteroides fragilis
8512DM5	d__Bacteria;p__Bacillota;c__Bacilli;o__Lactobacillales;f__Enterococcaceae;g__Enterococcus;s__Enterococcus faecalis
8512K3	d__Bacteria;p__Bacillota;c__Bacilli;o__Staphylococcales;f__Staphylococcaceae;g__Staphylococcus;s__Staphylococcus haemolyticus
8512K4	d__Bacteria;p__Bacillota;c__Bacilli;o__Staphylococcales;f__Staphylococcaceae;g__Staphylococcus;s__Staphylococcus haemolyticus
8512K7	d__Bacteria;p__Bacillota;c__Bacilli;o__Staphylococcales;f__Staphylococcaceae;g__Staphylococcus;s__Staphylococcus haemolyticus
8512SHA1	d__Bacteria;p__Bacillota;c__Bacilli;o__Staphylococcales;f__Staphylococcaceae;g__Staphylococcus;s__Staphylococcus haemolyticus
8513A10	d__Bacteria;p__Bacillota;c__Bacilli;o__Lactobacillales;f__Streptococcaceae;g__Streptococcus;s__Streptococcus gordonii
8513A11	d__Bacteria;p__Bacillota;c__Bacilli;o__Lactobacillales;f__Streptococcaceae;g__Streptococcus;s__
8513A12	d__Bacteria;p__Bacillota;c__Bacilli;o__Lactobacillales;f__Streptococcaceae;g__Streptococcus;s__Streptococcus constellatus
8513A4	d__Bacteria;p__Bacillota;c__Bacilli;o__Lactobacillales;f__Streptococcaceae;g__Streptococcus;s__Streptococcus oralis_BY
8513A7	d__Bacteria;p__Bacillota;c__Bacilli;o__Lactobacillales;f__Streptococcaceae;g__Streptococcus;s__Streptococcus mutans
8513A9	d__Bacteria;p__Bacillota;c__Bacilli;o__Lactobacillales;f__Streptococcaceae;g__Streptococcus;s__Streptococcus mitis_BZ
8513AN10.3	d__Bacteria;p__Bacillota;c__Bacilli;o__Lactobacillales;f__Streptococcaceae;g__Streptococcus;s__Streptococcus constellatus
8513AN2	d__Bacteria;p__Bacillota_C;c__Negativicutes;o__Veillonellales;f__Veillonellaceae;g__Veillonella;s__Veillonella parvula_A
8513AN6	d__Bacteria;p__Bacillota;c__Bacilli;o__Lactobacillales;f__Streptococcaceae;g__Streptococcus;s__Streptococcus constellatus
8513AN9.2	d__Bacteria;p__Bacillota;c__Bacilli;o__Lactobacillales;f__Streptococcaceae;g__Streptococcus;s__Streptococcus constellatus
8514A10	d__Bacteria;p__Bacillota;c__Bacilli;o__Lactobacillales;f__Streptococcaceae;g__Streptococcus;s__Streptococcus vestibularis
8514A11	d__Bacteria;p__Bacillota;c__Bacilli;o__Lactobacillales;f__Streptococcaceae;g__Streptococcus;s__Streptococcus oralis_BW
8514A3	d__Bacteria;p__Actinomycetota;c__Actinomycetes;o__Actinomycetales;f__Micrococcaceae;g__Rothia;s__Rothia mucilaginosa_A
8514A4	d__Bacteria;p__Bacillota;c__Bacilli;o__Lactobacillales;f__Streptococcaceae;g__Streptococcus;s__Streptococcus vestibularis
8514A6	d__Bacteria;p__Bacillota;c__Bacilli;o__Lactobacillales;f__Streptococcaceae;g__Streptococcus;s__Streptococcus vestibularis
8514A7	d__Bacteria;p__Bacillota;c__Bacilli;o__Lactobacillales;f__Streptococcaceae;g__Streptococcus;s__Streptococcus caecimuris
8514A8	d__Bacteria;p__Bacillota;c__Bacilli;o__Lactobacillales;f__Streptococcaceae;g__Streptococcus;s__Streptococcus parasanguinis
8514A9	d__Bacteria;p__Bacillota;c__Bacilli;o__Lactobacillales;f__Streptococcaceae;g__Streptococcus;s__Streptococcus parasanguinis
8514AN3	d__Bacteria;p__Bacillota;c__Bacilli;o__Lactobacillales;f__Streptococcaceae;g__Streptococcus;s__Streptococcus hominis
8514K1	d__Bacteria;p__Bacillota;c__Bacilli;o__Lactobacillales;f__Lactobacillaceae;g__Lacticaseibacillus;s__Lacticaseibacillus rhamnosus
8515A1	d__Bacteria;p__Pseudomonadota;c__Gammaproteobacteria;o__Burkholderiales;f__Neisseriaceae;g__Neisseria;s__Neisseria macacae
8515A8	d__Bacteria;p__Bacillota;c__Bacilli;o__Lactobacillales;f__Streptococcaceae;g__Streptococcus;s__Streptococcus oralis_BM
8515AN11	d__Bacteria;p__Bacillota;c__Bacilli;o__Lactobacillales;f__Streptococcaceae;g__Streptococcus;s__Streptococcus sp029691405
8515AN14	d__Bacteria;p__Bacillota;c__Bacilli;o__Lactobacillales;f__Streptococcaceae;g__Streptococcus;s__Streptococcus gordonii
8515AN6	d__Bacteria;p__Bacillota;c__Bacilli;o__Lactobacillales;f__Streptococcaceae;g__Streptococcus;s__Streptococcus sanguinis_A
8515ANT1	d__Bacteria;p__Pseudomonadota;c__Gammaproteobacteria;o__Enterobacterales;f__Enterobacteriaceae;g__Citrobacter_B;s__Citrobacter_B koseri
8515ANT3	d__Bacteria;p__Pseudomonadota;c__Gammaproteobacteria;o__Enterobacterales;f__Enterobacteriaceae;g__Citrobacter_B;s__Citrobacter_B koseri
8524A10	d__Bacteria;p__Bacillota;c__Bacilli;o__Lactobacillales;f__Streptococcaceae;g__Streptococcus;s__Streptococcus mitis
8524AN5	d__Bacteria;p__Bacillota;c__Bacilli;o__Lactobacillales;f__Streptococcaceae;g__Streptococcus;s__Streptococcus mitis_BX
8524AN6	d__Bacteria;p__Bacillota;c__Bacilli;o__Lactobacillales;f__Streptococcaceae;g__Streptococcus;s__Streptococcus mitis
8524AN8	d__Bacteria;p__Bacillota;c__Bacilli;o__Lactobacillales;f__Streptococcaceae;g__Streptococcus;s__Streptococcus constellatus
8524K2	d__Bacteria;p__Pseudomonadota;c__Gammaproteobacteria;o__Pseudomonadales;f__Moraxellaceae;g__Acinetobacter;s__Acinetobacter junii
8543A7	d__Bacteria;p__Bacillota;c__Bacilli;o__Lactobacillales;f__Streptococcaceae;g__Streptococcus;s__Streptococcus mitis_BX
8543AN1	d__Bacteria;p__Bacillota;c__Bacilli;o__Lactobacillales;f__Streptococcaceae;g__Streptococcus;s__Streptococcus anginosus
8543AN4	d__Bacteria;p__Bacillota;c__Bacilli;o__Lactobacillales;f__Streptococcaceae;g__Streptococcus;s__Streptococcus constellatus
8607AN1.2	d__Bacteria;p__Fusobacteriota;c__Fusobacteriia;o__Fusobacteriales;f__Fusobacteriaceae;g__Fusobacterium;s__Fusobacterium polymorphum
8607AN3	d__Bacteria;p__Bacillota;c__Bacilli;o__Lactobacillales;f__Streptococcaceae;g__Streptococcus;s__Streptococcus anginosus
8633AN2	d__Bacteria;p__Bacillota;c__Bacilli;o__Lactobacillales;f__Streptococcaceae;g__Streptococcus;s__Streptococcus anginosus
8633AN4	d__Bacteria;p__Bacillota;c__Bacilli;o__Lactobacillales;f__Streptococcaceae;g__Streptococcus;s__
8633TD2	d__Bacteria;p__Actinomycetota;c__Actinomycetes;o__Actinomycetales;f__Actinomycetaceae;g__Pauljensenia;s__Pauljensenia sp958349165
8633TD5	d__Bacteria;p__Bacillota;c__Bacilli;o__Lactobacillales;f__Streptococcaceae;g__Streptococcus;s__Streptococcus sinensis
8676A3	d__Bacteria;p__Bacillota;c__Bacilli;o__Lactobacillales;f__Streptococcaceae;g__Streptococcus;s__Streptococcus mitis_BZ
8676A4	d__Bacteria;p__Bacillota;c__Bacilli;o__Lactobacillales;f__Enterococcaceae;g__Enterococcus;s__Enterococcus faecalis
8676A7	d__Bacteria;p__Bacillota;c__Bacilli;o__Lactobacillales;f__Streptococcaceae;g__Streptococcus;s__Streptococcus gordonii
8676AN3	d__Bacteria;p__Actinomycetota;c__Actinomycetes;o__Actinomycetales;f__Actinomycetaceae;g__Actinomyces;s__Actinomyces graevenitzii
8676AN5	d__Bacteria;p__Bacillota;c__Bacilli;o__Lactobacillales;f__Streptococcaceae;g__Streptococcus;s__Streptococcus mitis_BZ
8676AN8	d__Bacteria;p__Bacillota;c__Bacilli;o__Lactobacillales;f__Streptococcaceae;g__Streptococcus;s__Streptococcus pseudopneumoniae_N
8691AN1	d__Bacteria;p__Bacillota;c__Bacilli;o__Lactobacillales;f__Streptococcaceae;g__Streptococcus;s__Streptococcus mitis_AT
8691AN2	d__Bacteria;p__Bacillota;c__Bacilli;o__Lactobacillales;f__Streptococcaceae;g__Streptococcus;s__Streptococcus gordonii
8691DM1	d__Bacteria;p__Bacillota;c__Bacilli;o__Staphylococcales;f__Staphylococcaceae;g__Staphylococcus;s__Staphylococcus hominis
8691DM4	d__Bacteria;p__Bacillota;c__Bacilli;o__Lactobacillales;f__Streptococcaceae;g__Streptococcus;s__Streptococcus xiaochunlingii
8691DM7	d__Bacteria;p__Bacillota;c__Bacilli;o__Lactobacillales;f__Streptococcaceae;g__Streptococcus;s__Streptococcus gordonii
8691OA9	d__Bacteria;p__Bacillota;c__Bacilli;o__Lactobacillales;f__Streptococcaceae;g__Streptococcus;s__Streptococcus mitis_AT

## Sheet: isolate_source
Supplementary Table 5: Source of isolation
isolate_id	Species	Source
8324OAN8	Strep. parasanguinis	Cancer
8355A1	Strep. salivarius	Cancer
8355AN1	Strep. infantis	Cancer
8355AN2	Strep. salivarius	Cancer
8389O4	Strep. sp013394695	Cancer
8389S2	Strep. oralis	Cancer
8389SA4	Strep. sp001556435	Cancer
8408OA3	Strep. parasanguinis	Cancer
8420OA2	Strep. oralis	Cancer
8421A4	Strep. parasanguinis	Cancer
8421OA3	Strep. salivarius	Cancer
8431AN1	Strep. mitis	Cancer
8451AG2	Strep. infantis	Cancer
8451ANG2	Strep. gordonii	Cancer
8451ANT4	Strep. infantis	Cancer
8451AT5	Strep. infantis	Cancer
8451AT6	Strep. infantis	Cancer
8451AT7	Strep. sanguinis	Cancer
8451DM12	Strep. gordonii	Cancer
8451DM4	Strep. oralis	Cancer
8451DM9	Strep. mitis	Cancer
8457AT2	Strep. salivarius	Cancer
8457OAN3	Strep. infantis	Cancer
8457OAN4	Strep. infantis	Cancer
8468AN4	Strep. rubneri	Cancer
8468DM2	Strep. cristatus	Cancer
8468OAN1	Strep. xiaochunlingii	Cancer
8468OAN3	Strep. infantis	Cancer
8484A3	Strep. mitis	Cancer
8484A8	Strep. mitis	Cancer
8485DM3	Strep. parasanguinis	Cancer
8497AN4	Strep. mitis	Cancer
8497OA7	Strep. salivarius	Cancer
8497OA8	Strep. parasanguinis	Cancer
8498AN14.3	Strep. mitis	Cancer
8498OA9	Strep. oralis	Cancer
8507K3	Strep. anginosus	Cancer
8511A3	Strep. salivarius	Cancer
8511A7	Strep. parasanguinis	Cancer
8511A8	Strep. oralis	Cancer
8511AN11	Strep. anginosus	Cancer
8512A6.2	Strep. parasanguinis	Cancer
8512A8	Strep. mitis	Cancer
8512AN2	Strep. anginosus	Cancer
8512AN4	Strep. anginosus	Cancer
8513A10	Strep. gordonii	Cancer
8513A12	Strep. constellatus	Cancer
8513A4	Strep. oralis	Cancer
8513A9	Strep. mitis	Cancer
8513AN9.2	Strep. constellatus	Cancer
8514A10	Strep. vestibularis	Cancer
8514A11	Strep. oralis	Cancer
8514A4	Strep. vestibularis	Cancer
8514A6	Strep. vestibularis	Cancer
8514A8	Strep. parasanguinis	Cancer
8514A9	Strep. parasanguinis	Cancer
8515A8	Strep. oralis	Cancer
8515AN14	Strep. gordonii	Cancer
8515AN6	Strep. sanguinis	Cancer
8524A10	Strep. mitis	Cancer
8524AN5	Strep. mitis	Cancer
8524AN6	Strep. mitis	Cancer
8524AN8	Strep. constellatus	Cancer
8543A7	Strep. mitis	Cancer
8543AN1	Strep. anginosus	Cancer
8543AN4	Strep. constellatus	Cancer
8607AN3	Strep. anginosus	Cancer
8633AN2	Strep. anginosus	Cancer
8633TD5	Strep. sinensis	Cancer
8676A3	Strep. mitis	Cancer
8676A7	Strep. gordonii	Cancer
8676AN5	Strep. mitis	Cancer
8676AN8	Strep. pseudopneumoniae	Cancer
8691AN1	Strep. mitis	Cancer
8691AN2	Strep. gordonii	Cancer
8691DM4	Strep. xiaochunlingii	Cancer
ODP-AF03-102	Strep. oralis	Healthy
ODP-AF04-102	Strep. salivarius	Healthy
ODP-AF04-103	Strep. salivarius	Healthy
ODP-AF04-106	Strep. salivarius	Healthy
ODP-AF04-107	Strep. salivarius	Healthy
ODP-AF04-108	Strep. salivarius	Healthy
ODP-AF04-166	Strep. sanguinis	Healthy
ODP-AF04-238	Strep. sanguinis	Healthy
ODP-AF04-243	Strep. sanguinis	Healthy
ODP-AF04-71	Strep. salivarius	Healthy
ODP-AF04-87	Strep. salivarius	Healthy
ODP-AF04-91	Strep. salivarius	Healthy
ODP-AF04-99	Strep. salivarius	Healthy
ODP-AF05-203	Strep. anginosus	Healthy
ODP-AF05-68	Strep. parasanguinis	Healthy
ODP-AF05-69	Strep. parasanguinis	Healthy
ODP-AF05-77	Strep. salivarius	Healthy
ODP-AF06-108	Strep. oralis	Healthy
ODP-AF06-99	Strep. mitis	Healthy
ODP-AF08-1-MRS	Strep. sanguinis	Healthy
ODP-AF08-10-MRS	Strep. oralis	Healthy
ODP-AF08-11-MRS	Strep. sanguinis	Healthy
ODP-AF08-11-O-MRS	Strep. anginosus	Healthy
ODP-AF08-13-MRS	Strep. constellatus	Healthy
ODP-AF08-15-MRS	Strep. anginosus	Healthy
ODP-AF08-16-MRS	Strep. constellatus	Healthy
ODP-AF08-17-MRS	Strep. sanguinis	Healthy
ODP-AF08-18-MRS	Strep. sanguinis	Healthy
ODP-AF08-18-O-MRS	Strep. salivarius	Healthy
ODP-AF08-2	Strep. oralis	Healthy
ODP-AF08-2-MRS	Strep. anginosus	Healthy
ODP-AF08-20-MRS	Strep. constellatus	Healthy
ODP-AF08-21-MRS	Strep. oralis	Healthy
ODP-AF08-23-MRS	Strep. oralis	Healthy
ODP-AF08-25-O-MRS	Strep. anginosus	Healthy
ODP-AF08-26-O-MRS	Strep. sanguinis	Healthy
ODP-AF08-27-MRS	Strep. sanguinis	Healthy
ODP-AF08-27-O-MRS	Strep. anginosus	Healthy
ODP-AF08-3	Strep. constellatus	Healthy
ODP-AF08-35-MRS	Strep. oralis	Healthy
ODP-AF08-36-MRS	Strep. oralis	Healthy
ODP-AF08-38-MRS	Strep. mitis	Healthy
ODP-AF08-40-MRS	Strep. constellatus	Healthy
ODP-AF08-41-MRS	Strep. oralis	Healthy
ODP-AF08-7-MRS	Strep. oralis	Healthy
ODP-AF08-8-MRS	Strep. oralis	Healthy
ODP-AF10-C23	Strep. mitis	Healthy
ODP-AF10-C6	Strep. constellatus	Healthy
ODP-AM01-02BB	Strep. oralis	Healthy
ODP-AM01-04	Strep. sinensis	Healthy
ODP-AM01-04MBO	Strep. vestibularis	Healthy
ODP-AM01-08	Strep. oralis	Healthy
ODP-AM04-107	Strep. salivarius	Healthy
ODP-AM04-38	Strep. salivarius	Healthy
ODP-AM04-44	Strep. salivarius	Healthy
ODP-AM04-46	Strep. salivarius	Healthy
ODP-AM05-19	Strep. oralis	Healthy
ODP-AM05-237	Strep. salivarius	Healthy
ODP-AM05-24	Strep. gordonii	Healthy
ODP-AM05-243	Strep. sanguinis	Healthy
ODP-AM05-244	Strep. anginosus	Healthy
ODP-AM05-247	Strep. sanguinis	Healthy
ODP-AM05-248	Strep. anginosus	Healthy
ODP-AM05-25	Strep. mitis	Healthy
ODP-AM05-254	Strep. sanguinis	Healthy
ODP-AM05-264	Strep. mitis	Healthy
ODP-AM05-265	Strep. anginosus	Healthy
ODP-AM05-266	Strep. constellatus	Healthy
ODP-AM05-267	Strep. mitis	Healthy
ODP-AM05-273	Strep. anginosus	Healthy
ODP-AM05-34	Strep. anginosus	Healthy
ODP-AM05-394	Strep. sinensis	Healthy
ODP-AM05-395	Strep. constellatus	Healthy
ODP-AM05-41	Strep. anginosus	Healthy
ODP-AM05-415	Strep. sanguinis	Healthy
ODP-AM05-429	Strep. salivarius	Healthy
ODP-AM05-49	Strep. mitis	Healthy
ODP-AM05-501	Strep. sanguinis	Healthy
ODP-AM05-503	Strep. gordonii	Healthy
ODP-AM05-535	Strep. mitis	Healthy
ODP-AM05-72	Strep. salivarius	Healthy
ODP-AM05-73	Strep. gordonii	Healthy
ODP-AM05-78	Strep. gordonii	Healthy
ODP-AM05-80	Strep. oralis	Healthy
ODP-AM08-275	Strep. salivarius	Healthy
ODP-AM08-279	Strep. salivarius	Healthy
ODP-AM08-292	Strep. sanguinis	Healthy
ODP-AM08-308	Strep. gordonii	Healthy
ODP-AM08-309	Strep. cristatus	Healthy
ODP-AM09-10-O-104	Strep. oralis	Healthy
ODP-AM09-10-O-BH	Strep. infantis	Healthy
ODP-AM09-11-104	Strep. anginosus	Healthy
ODP-AM09-11-BH	Strep. gordonii	Healthy
ODP-AM09-12-O-104	Strep. constellatus	Healthy
ODP-AM09-13-O-BH	Strep. gordonii	Healthy
ODP-AM09-16-O-104	Strep. oralis	Healthy
ODP-AM09-16-O-BH	Strep. oralis	Healthy
ODP-AM09-17-104	Strep. oralis	Healthy
ODP-AM09-18-104	Strep. gordonii	Healthy
ODP-AM09-22-104	Strep. gordonii	Healthy
ODP-AM09-23-104	Strep. oralis	Healthy
ODP-AM09-23-BH	Strep. oralis	Healthy
ODP-AM09-23-O-104	Strep. oralis	Healthy
ODP-AM09-26-104	Strep. oralis	Healthy
ODP-AM09-27-104	Strep. oralis	Healthy
ODP-AM09-29-O-BH	Strep. sanguinis	Healthy
ODP-AM09-2D1	Strep. salivarius	Healthy
ODP-AM09-2D16	Strep. salivarius	Healthy
ODP-AM09-2D2	Strep. salivarius	Healthy
ODP-AM09-2D20	Strep. salivarius	Healthy
ODP-AM09-2D4A	Strep. salivarius	Healthy
ODP-AM09-2D4B	Strep. salivarius	Healthy
ODP-AM09-2D5	Strep. salivarius	Healthy
ODP-AM09-30-BH	Strep. parasanguinis	Healthy
ODP-AM09-31-O-BH	Strep. gordonii	Healthy
ODP-AM09-33-BH	Strep. mitis	Healthy
ODP-AM09-33-O-BH	Strep. gordonii	Healthy
ODP-AM09-34-BH	Strep. constellatus	Healthy
ODP-AM09-39-BH	Strep. gordonii	Healthy
ODP-AM09-39-O-BH	Strep. mitis	Healthy
ODP-AM09-4-O-104	Strep. constellatus	Healthy
ODP-AM09-4-O-BH	Strep. sanguinis	Healthy
ODP-AM09-41-O-BH	Strep. xiaochunlingii	Healthy
ODP-AM09-43-BH	Strep. gordonii	Healthy
ODP-AM09-46-O-BH	Strep. oralis	Healthy
ODP-AM09-48-O-BH	Strep. gordonii	Healthy
ODP-AM09-49-O-BH	Strep. oralis	Healthy
ODP-AM09-5-104	Strep. oralis	Healthy
ODP-AM09-5-O-104	Strep. sanguinis	Healthy
ODP-AM09-5-O-BH	Strep. sanguinis	Healthy
ODP-AM09-8-104	Strep. parasanguinis	Healthy
ODP-AM09-9-O-104	Strep. oralis	Healthy
ODP-TM06-143	Strep. salivarius	Healthy
ODP-TM06-164	Strep. sanguinis	Healthy
ODP-TM06-50	Strep. gordonii	Healthy
ODP-TM06-55	Strep. gordonii	Healthy
ODP-TM07-158	Strep. cristatus	Healthy
ODP-TM07-159	Strep. xiaochunlingii	Healthy
ODP-TM07-162	Strep. oralis	Healthy
ODP-TM07-198	Strep. cristatus	Healthy
ODP-TM07-209	Strep. oralis	Healthy
ODP-TM07-212	Strep. mitis	Healthy
ODP-TM07-271	Strep. cristatus	Healthy
ODP-TM07-272	Strep. oralis	Healthy
ORS-AF03-153	Strep. sp001556435	Healthy
ORS-AF03-170	Strep. mitis	Healthy
ORS-AF04-127	Strep. cristatus	Healthy
ORS-AF04-129	Strep. parasanguinis	Healthy
ORS-AF04-146	Strep. salivarius	Healthy
ORS-AF04-232	Strep. xiaochunlingii	Healthy
ORS-AF04-234	Strep. parasanguinis	Healthy
ORS-AF04-236	Strep. sanguinis	Healthy
ORS-AF04-35	Strep. sanguinis	Healthy
ORS-AF04-36	Strep. salivarius	Healthy
ORS-AF04-41	Strep. sanguinis	Healthy
ORS-AF04-54	Strep. oralis	Healthy
ORS-AF04-59	Strep. oralis	Healthy
ORS-AF05-10	Strep. salivarius	Healthy
ORS-AF05-12	Strep. salivarius	Healthy
ORS-AF05-14	Strep. salivarius	Healthy
ORS-AF05-15	Strep. salivarius	Healthy
ORS-AF05-16	Strep. salivarius	Healthy
ORS-AF05-242	Strep. salivarius	Healthy
ORS-AF06-69	Strep. anginosus	Healthy
ORS-AF08-13	Strep. oralis	Healthy
ORS-AF08-14	Strep. oralis	Healthy
ORS-AF08-15	Strep. salivarius	Healthy
ORS-AF08-16	Strep. sanguinis	Healthy
ORS-AF08-17	Strep. oralis	Healthy
ORS-AF08-18	Strep. constellatus	Healthy
ORS-AF08-19	Strep. oralis	Healthy
ORS-AF08-2	Strep. salivarius	Healthy
ORS-AF08-2-MRS	Strep. salivarius	Healthy
ORS-AF08-20-MRS	Strep. salivarius	Healthy
ORS-AF08-21	Strep. oralis	Healthy
ORS-AF08-22	Strep. oralis	Healthy
ORS-AF08-23-MRS	Strep. salivarius	Healthy
ORS-AF08-24	Strep. oralis	Healthy
ORS-AF08-30-MRS	Strep. salivarius	Healthy
ORS-AF08-4-MRS	Strep. oralis	Healthy
ORS-AF08-5-MRS	Strep. salivarius	Healthy
ORS-AF08-6	Strep. salivarius	Healthy
ORS-AF08-7-MRS	Strep. salivarius	Healthy
ORS-AF08-9	Strep. salivarius	Healthy
ORS-AF10-1-BH	Strep. parasanguinis	Healthy
ORS-AF10-2-BH	Strep. parasanguinis	Healthy
ORS-AF10-3-BH	Strep. sp013394695	Healthy
ORS-AF10-7-BH	Strep. oralis	Healthy
ORS-AF10-9-BH	Strep. mitis	Healthy
ORS-AF10-C8	Strep. mitis	Healthy
ORS-AM01-01	Strep. vestibularis	Healthy
ORS-AM01-02MB	Strep. sanguinis	Healthy
ORS-AM01-03BB	Strep. rubneri	Healthy
ORS-AM01-04MB	Strep. constellatus	Healthy
ORS-AM04-31	Strep. salivarius	Healthy
ORS-AM04-35	Strep. salivarius	Healthy
ORS-AM05-121	Strep. salivarius	Healthy
ORS-AM05-122	Strep. oralis	Healthy
ORS-AM05-138	Strep. mitis	Healthy
ORS-AM05-141	Strep. mitis	Healthy
ORS-AM05-155	Strep. salivarius	Healthy
ORS-AM05-177	Strep. constellatus	Healthy
ORS-AM05-183	Strep. mitis	Healthy
ORS-AM05-344	Strep. rubneri	Healthy
ORS-AM05-355	Strep. rubneri	Healthy
ORS-AM05-363	Strep. sinensis	Healthy
ORS-AM05-365	Strep. mitis	Healthy
ORS-AM05-478	Strep. mitis	Healthy
ORS-AM05-484	Strep. salivarius	Healthy
ORS-AM05-485	Strep. rubneri	Healthy
ORS-AM05-490	Strep. rubneri	Healthy
ORS-AM05-491	Strep. oralis	Healthy
ORS-AM05-494	Strep. salivarius	Healthy
ORS-AM05-495	Strep. constellatus	Healthy
ORS-AM08-119	Strep. salivarius	Healthy
ORS-AM08-15	Strep. salivarius	Healthy
ORS-AM08-168	Strep. parasanguinis	Healthy
ORS-AM08-32	Strep. anginosus	Healthy
ORS-AM08-42	Strep. parasanguinis	Healthy
ORS-AM08-59	Strep. anginosus	Healthy
ORS-AM08-60	Strep. xiaochunlingii	Healthy
ORS-AM09-10-104	Strep. pseudopneumoniae	Healthy
ORS-AM09-10-O-104	Strep. sanguinis	Healthy
ORS-AM09-11-O-104	Strep. oralis	Healthy
ORS-AM09-12-104	Strep. salivarius	Healthy
ORS-AM09-15-O-104	Strep. salivarius	Healthy
ORS-AM09-16-104	Strep. oralis	Healthy
ORS-AM09-16-BH	Strep. oralis	Healthy
ORS-AM09-16-O-104	Strep. salivarius	Healthy
ORS-AM09-18-104	Strep. infantis	Healthy
ORS-AM09-20-BH	Strep. salivarius	Healthy
ORS-AM09-20-O-BH	Strep. cristatus	Healthy
ORS-AM09-21-O-104	Strep. salivarius	Healthy
ORS-AM09-22-104	Strep. mitis	Healthy
ORS-AM09-22-O-BH	Strep. infantis	Healthy
ORS-AM09-23-O-104	Strep. parasanguinis	Healthy
ORS-AM09-24-O-BH	Strep. infantis	Healthy
ORS-AM09-27-BH	Strep. sanguinis	Healthy
ORS-AM09-27-O-104	Strep. oralis	Healthy
ORS-AM09-29-O-BH	Strep. parasanguinis	Healthy
ORS-AM09-30-BH	Strep. salivarius	Healthy
ORS-AM09-33-O-BH	Strep. salivarius	Healthy
ORS-AM09-39-O-BH	Strep. infantis	Healthy
ORS-AM09-4-104	Strep. sp013394695	Healthy
ORS-AM09-4-O-104	Strep. oralis	Healthy
ORS-AM09-4-O-BH	Strep. parasanguinis	Healthy
ORS-AM09-43-O-BH	Strep. oralis	Healthy
ORS-AM09-5-104	Strep. mitis	Healthy
ORS-AM09-5-O-BH	Strep. parasanguinis	Healthy
ORS-AM09-6-O-BH	Strep. parasanguinis	Healthy
ORS-AM09-7-O-104	Strep. gordonii	Healthy
ORS-AM09-8-O-104	Strep. salivarius	Healthy
ORS-AM09-9-O-104	Strep. oralis	Healthy
ORS-TM06-05	Strep. anginosus	Healthy
ORS-TM06-06	Strep. gordonii	Healthy
ORS-TM06-07	Strep. anginosus	Healthy
ORS-TM06-111	Strep. anginosus	Healthy
ORS-TM06-112	Strep. parasanguinis	Healthy
ORS-TM06-118	Strep. anginosus	Healthy
ORS-TM06-15	Strep. xiaochunlingii	Healthy
ORS-TM06-219	Strep. parasanguinis	Healthy
ORS-TM06-222	Strep. salivarius	Healthy
ORS-TM06-24	Strep. salivarius	Healthy
ORS-TM06-27	Strep. gordonii	Healthy
ORS-TM06-36	Strep. oralis	Healthy
ORS-TM06-39	Strep. xiaochunlingii	Healthy
ORS-TM06-84	Strep. salivarius	Healthy
ORS-TM06-89	Strep. cristatus	Healthy
ORS-TM07-19	Strep. sanguinis	Healthy
ORS-TM07-21	Strep. rubneri	Healthy
ORS-TM07-215	Strep. sinensis	Healthy
ORS-TM07-224	Strep. salivarius	Healthy
ORS-TM07-230	Strep. salivarius	Healthy
ORS-TM07-240	Strep. mitis	Healthy
ORS-TM07-241	Strep. sinensis	Healthy
ORS-TM07-269	Strep. mitis	Healthy
ORS-TM07-39	Strep. rubneri	Healthy
ORS-TM07-51	Strep. salivarius	Healthy
ORS-TM07-52	Strep. xiaochunlingii	Healthy
ORS-TM07-61	Strep. salivarius	Healthy
ORT-AF03-01	Strep. parasanguinis	Healthy
ORT-AF03-08	Strep. parasanguinis	Healthy
ORT-AF03-129	Strep. parasanguinis	Healthy
ORT-AF03-21	Strep. salivarius	Healthy
ORT-AF03-214	Strep. infantis	Healthy
ORT-AF03-24	Strep. sp001556435	Healthy
ORT-AF04-01	Strep. salivarius	Healthy
ORT-AF04-11	Strep. salivarius	Healthy
ORT-AF04-117	Strep. parasanguinis	Healthy
ORT-AF04-118	Strep. parasanguinis	Healthy
ORT-AF04-121	Strep. salivarius	Healthy
ORT-AF04-19	Strep. salivarius	Healthy
ORT-AF04-193	Strep. salivarius	Healthy
ORT-AF04-228	Strep. salivarius	Healthy
ORT-AF04-23	Strep. salivarius	Healthy
ORT-AF04-26	Strep. salivarius	Healthy
ORT-AF04-29	Strep. salivarius	Healthy
ORT-AF04-30	Strep. salivarius	Healthy
ORT-AF06-16	Strep. infantis	Healthy
ORT-AF06-30	Strep. xiaochunlingii	Healthy
ORT-AF06-36	Strep. infantis	Healthy
ORT-AF08-11	Strep. oralis	Healthy
ORT-AF08-12	Strep. salivarius	Healthy
ORT-AF08-12-O-MRS	Strep. salivarius	Healthy
ORT-AF08-13	Strep. oralis	Healthy
ORT-AF08-14-O-MRS	Strep. anginosus	Healthy
ORT-AF08-15	Strep. salivarius	Healthy
ORT-AF08-16	Strep. oralis	Healthy
ORT-AF08-19	Strep. anginosus	Healthy
ORT-AF08-19-MRS	Strep. sanguinis	Healthy
ORT-AF08-2	Strep. anginosus	Healthy
ORT-AF08-20-O-MRS	Strep. sanguinis	Healthy
ORT-AF08-21-O-MRS	Strep. oralis	Healthy
ORT-AF08-24-MRS	Strep. salivarius	Healthy
ORT-AF08-28-MRS	Strep. constellatus	Healthy
ORT-AF08-3	Strep. constellatus	Healthy
ORT-AF08-32-MRS	Strep. constellatus	Healthy
ORT-AF08-34-MRS	Strep. oralis	Healthy
ORT-AF08-35-MRS	Strep. parasanguinis	Healthy
ORT-AF08-4	Strep. oralis	Healthy
ORT-AF08-6	Strep. salivarius	Healthy
ORT-AF08-8	Strep. salivarius	Healthy
ORT-AF08-9	Strep. salivarius	Healthy
ORT-AF10-05-O-BH	Strep. mitis	Healthy
ORT-AF10-08-O-BH	Strep. parasanguinis	Healthy
ORT-AF10-10-O-BH	Strep. salivarius	Healthy
ORT-AF10-14-O-BH	Strep. oralis	Healthy
ORT-AF10-15-O-BH	Strep. infantis	Healthy
ORT-AF10-20-O-BH	Strep. gordonii	Healthy
ORT-AF10-26-O-BH	Strep. salivarius	Healthy
ORT-AM01-05MB	Strep. constellatus	Healthy
ORT-AM04-01	Strep. salivarius	Healthy
ORT-AM04-53	Strep. salivarius	Healthy
ORT-AM04-57	Strep. salivarius	Healthy
ORT-AM04-65	Strep. salivarius	Healthy
ORT-AM05-07	Strep. salivarius	Healthy
ORT-AM05-102	Strep. mitis	Healthy
ORT-AM05-104	Strep. mitis	Healthy
ORT-AM05-106	Strep. salivarius	Healthy
ORT-AM05-108	Strep. salivarius	Healthy
ORT-AM05-112	Strep. gordonii	Healthy
ORT-AM05-13	Strep. mitis	Healthy
ORT-AM05-281	Strep. mitis	Healthy
ORT-AM05-287	Strep. mitis	Healthy
ORT-AM05-291	Strep. salivarius	Healthy
ORT-AM05-453	Strep. constellatus	Healthy
ORT-AM05-499	Strep. rubneri	Healthy
ORT-AM05-500	Strep. mitis	Healthy
ORT-AM05-507	Strep. salivarius	Healthy
ORT-AM05-511	Strep. constellatus	Healthy
ORT-AM05-512	Strep. constellatus	Healthy
ORT-AM05-514	Strep. salivarius	Healthy
ORT-AM05-515	Strep. salivarius	Healthy
ORT-AM05-521	Strep. mitis	Healthy
ORT-AM05-525	Strep. mitis	Healthy
ORT-AM05-527	Strep. mitis	Healthy
ORT-AM05-63	Strep. salivarius	Healthy
ORT-AM05-89	Strep. oralis	Healthy
ORT-AM08-194	Strep. salivarius	Healthy
ORT-AM08-202	Strep. salivarius	Healthy
ORT-AM08-206	Strep. pseudopneumoniae	Healthy
ORT-AM08-425	Strep. anginosus	Healthy
ORT-AM08-438	Strep. salivarius	Healthy
ORT-AM08-450	Strep. anginosus	Healthy
ORT-AM08-463	Strep. anginosus	Healthy
ORT-AM09-10-104	Strep. infantis	Healthy
ORT-AM09-17-104	Strep. parasanguinis	Healthy
ORT-AM09-21-O-104	Strep. oralis	Healthy
ORT-AM09-22-O-104	Strep. oralis	Healthy
ORT-AM09-23-104	Strep. infantis	Healthy
ORT-AM09-24-O-104	Strep. oralis	Healthy
ORT-AM09-3-104	Strep. sp013394695	Healthy
ORT-AM09-5-O-104	Strep. parasanguinis	Healthy
ORT-AM09-6-O-104	Strep. oralis	Healthy
ORT-AM09-7-O-104	Strep. sanguinis	Healthy
ORT-AM09-8-104	Strep. sp013394695	Healthy
ORT-AM09-9-104	Strep. parasanguinis	Healthy
ORT-TM06-175	Strep. salivarius	Healthy
ORT-TM06-179	Strep. salivarius	Healthy
ORT-TM06-181	Strep. gordonii	Healthy
ORT-TM06-189	Strep. sanguinis	Healthy
ORT-TM06-194	Strep. xiaochunlingii	Healthy
ORT-TM06-195	Strep. gordonii	Healthy
ORT-TM06-203	Strep. parasanguinis	Healthy
ORT-TM06-205	Strep. salivarius	Healthy
ORT-TM07-100	Strep. salivarius	Healthy
ORT-TM07-107	Strep. xiaochunlingii	Healthy
ORT-TM07-112	Strep. salivarius	Healthy
ORT-TM07-207	Strep. salivarius	Healthy
ORT-TM07-84	Strep. salivarius	Healthy
ORT-TM07-93	Strep. salivarius	Healthy

## Sheet: pair_wise
Supplementary Tbale 6: ANI, number of indels and SNP-based genomic similarity analysis to identify unique isolates from HNC patients
Query_ID	Reference_ID	ANI	SPN	Number_of_Indels	Uniqueness_Status
8305AN2	8305AN3	99.9996	0	0	Not Unique
8305AN2	8305AN4	99.9978	0	1	Not Unique
8305AN2	8305OAN3	99.9454	0	301	Unique
8305AN2	8305OA4	92.97	0	84091	Unique
8305AN3	8305AN2	99.9957	0	0	Not Unique
8305AN3	8305AN4	99.9999	0	1	Not Unique
8305AN3	8305OAN3	99.9482	0	301	Unique
8305AN3	8305OA4	92.9766	0	84113	Unique
8305AN4	8305AN3	99.9858	0	1	Not Unique
8305AN4	8305AN2	99.9803	0	1	Not Unique
8305AN4	8305OAN3	99.9472	0	309	Unique
8305AN4	8305OA4	93.0197	0	84179	Unique
8305OA4	8305AN4	92.8255	0	84056	Unique
8305OA4	8305AN3	92.9067	0	84090	Unique
8305OA4	8305AN2	92.8931	0	84091	Unique
8305OA4	8305OAN3	92.7498	0	84284	Unique
8305OAN3	8305AN4	99.9466	0	300	Unique
8305OAN3	8305AN3	99.931	0	303	Unique
8305OAN3	8305AN2	99.9306	0	303	Unique
8305OAN3	8305OA4	92.9946	0	84160	Unique
8324AN10	8324AN5	99.9993	0	0	Not Unique
8324AN10	8324OAN9	99.9984	0	25	Not Unique
8324AN5	8324AN10	99.9936	0	0	Not Unique
8324AN5	8324OAN9	99.9971	0	25	Not Unique
8324OAN9	8324AN5	99.9672	0	31	Not Unique
8324OAN9	8324AN10	99.9669	0	31	Not Unique
8355A1	8355A6	99.9972	0	6	Not Unique
8355A1	8355AN2	99.9291	0	418	Unique
8355A6	8355A1	99.9971	0	5	Not Unique
8355A6	8355AN2	99.9249	0	416	Unique
8355AN2	8355A1	99.9833	0	454	Unique
8355AN2	8355A6	99.9816	0	455	Unique
8389AN2	8389DM2	99.9833	0	9	Not Unique
8389AN2	8389S5	99.9991	0	12	Not Unique
8389DM2	8389S5	99.9998	0	5	Not Unique
8389DM2	8389AN2	99.9994	0	9	Not Unique
8389DM3	8389DM5	99.9942	0	2	Not Unique
8389DM5	8389DM3	99.9963	0	2	Not Unique
8389S5	8389DM2	99.9713	0	5	Not Unique
8389S5	8389AN2	99.9977	0	12	Not Unique
8451AG2	8451AT5	99.9247	0	1481	Unique
8451ANG1	8451ANG2	100	0	0	Not Unique
8451ANG1	8451ANG5	99.9995	0	1	Not Unique
8451ANG1	8451DM13	99.9981	0	7	Not Unique
8451ANG1	8451AT4	99.997	0	18	Not Unique
8451ANG1	8451DM12	99.993	0	219	Unique
8451ANG2	8451ANG1	99.9803	0	0	Not Unique
8451ANG2	8451ANG5	99.9789	0	1	Not Unique
8451ANG2	8451DM13	99.9657	0	7	Not Unique
8451ANG2	8451AT4	99.9704	0	18	Not Unique
8451ANG2	8451DM12	99.9671	0	219	Unique
8451ANG5	8451ANG2	99.999	0	1	Not Unique
8451ANG5	8451ANG1	99.9973	0	1	Not Unique
8451ANG5	8451DM13	99.9906	0	6	Not Unique
8451ANG5	8451AT4	99.9964	0	17	Not Unique
8451ANG5	8451DM12	99.9846	0	218	Unique
8451ANG6	8451DM8	99.9954	0	15	Not Unique
8451ANG6	8451DM10	99.9874	0	22	Not Unique
8451ANT1	8451AT8	81.3613	0	31511	Unique
8451AT4	8451ANG5	99.9987	0	17	Not Unique
8451AT4	8451DM13	99.9918	0	17	Not Unique
8451AT4	8451ANG2	99.9978	0	18	Not Unique
8451AT4	8451ANG1	99.9961	0	18	Not Unique
8451AT4	8451DM12	99.9864	0	225	Unique
8451AT5	8451AG2	99.9189	0	1481	Unique
8451AT8	8451ANT1	81.043	0	31454	Unique
8451DM10	8451DM8	99.9904	0	7	Not Unique
8451DM10	8451ANG6	99.9172	0	22	Not Unique
8451DM12	8451DM13	99.9941	0	218	Unique
8451DM12	8451ANG5	99.9939	0	218	Unique
8451DM12	8451ANG2	99.9941	0	219	Unique
8451DM12	8451ANG1	99.9934	0	219	Unique
8451DM12	8451AT4	99.9932	0	225	Unique
8451DM13	8451ANG5	99.9996	0	6	Not Unique
8451DM13	8451ANG2	99.9996	0	7	Not Unique
8451DM13	8451ANG1	99.9993	0	7	Not Unique
8451DM13	8451AT4	99.9987	0	17	Not Unique
8451DM13	8451DM12	99.9941	0	218	Unique
8451DM8	8451DM10	99.9858	0	7	Not Unique
8451DM8	8451ANG6	99.9268	0	15	Not Unique
8457OAN1	8457OAN3	84.3812	0	119103	Unique
8457OAN3	8457OAN1	84.3153	0	119493	Unique
8457OAN4	8457OAN1	84.3812	0	119103	Unique
8457OAN4	8457OAN3	84.3153	0	119493	Unique
8484A3	8484A8	99.8688	0	2177	Unique
8484A8	8484A3	99.873	0	2193	Unique
8484AN1	8484AN2	99.994	0	89	Unique
8484AN2	8484AN1	99.9949	0	89	Unique
8485A3	8485A5	99.9939	0	2	Not Unique
8485A5	8485A3	99.9939	0	2	Not Unique
8485AN1	8485AN10	96.5323	0	56230	Unique
8485AN10	8485AN1	96.5129	0	56259	Unique
8485DM1	8485DM5	99.9782	0	4	Not Unique
8485DM1	8485DM6	99.9753	0	5	Not Unique
8485DM1	8485DM2	99.9627	0	5	Not Unique
8485DM2	8485DM1	99.9996	0	1	Not Unique
8485DM2	8485DM6	99.9976	0	1	Not Unique
8485DM2	8485DM5	99.9986	0	2	Not Unique
8485DM5	8485DM1	99.9999	0	0	Not Unique
8485DM5	8485DM6	99.9978	0	1	Not Unique
8485DM5	8485DM2	99.9997	0	2	Not Unique
8485DM6	8485DM2	99.9992	0	1	Not Unique
8485DM6	8485DM1	99.9968	0	1	Not Unique
8485DM6	8485DM5	99.9959	0	1	Not Unique
8494AN11	8494AN3	96.1914	0	64651	Unique
8494AN11	8494AN8	96.1951	0	64775	Unique
8494AN3	8494AN8	99.9539	0	349	Unique
8494AN3	8494AN11	96.2752	0	64416	Unique
8494AN8	8494AN3	99.9539	0	351	Unique
8494AN8	8494AN11	96.2582	0	64582	Unique
8498AN8	8498DM3	99.9709	0	42	Not Unique
8498AN8	8498DM4	99.9077	0	52	Not Unique
8498DM3	8498DM4	99.9985	0	11	Not Unique
8498DM3	8498AN8	99.9709	0	41	Not Unique
8498DM4	8498DM3	99.9982	0	11	Not Unique
8498DM4	8498AN8	99.971	0	52	Not Unique
8507AN13	8507OAN12	99.9974	0	5	Not Unique
8507K2	8507K3	99.9963	0	0	Not Unique
8507K3	8507K2	99.9971	0	0	Not Unique
8507OAN12	8507AN13	99.9691	0	5	Not Unique
8511AN3	8511AN4	99.9716	0	5	Not Unique
8511AN3	8511AN7	96.2402	0	59741	Unique
8511AN4	8511AN3	99.9955	0	5	Not Unique
8511AN4	8511AN7	96.3368	0	59722	Unique
8511AN7	8511AN3	96.295	0	59631	Unique
8511AN7	8511AN4	96.2987	0	59753	Unique
8512A6.1	8512A6.2	99.985	0	33	Not Unique
8512A6.2	8512A6.1	99.9884	0	35	Not Unique
8512AN10	8512DM1	99.9996	0	0	Not Unique
8512AN10	8512AN4	99.9966	0	0	Not Unique
8512AN10	8512AN3	99.9944	0	1	Not Unique
8512AN10	8512AN2	99.8398	0	3428	Unique
8512AN2	8512DM1	99.8369	0	3427	Unique
8512AN2	8512AN4	99.8239	0	3427	Unique
8512AN2	8512AN10	99.7828	0	3427	Unique
8512AN2	8512AN3	99.8286	0	3428	Unique
8512AN3	8512AN4	99.9944	0	1	Not Unique
8512AN3	8512DM1	99.9729	0	1	Not Unique
8512AN3	8512AN10	99.9661	0	1	Not Unique
8512AN3	8512AN2	99.8458	0	3430	Unique
8512AN4	8512DM1	99.9742	0	0	Not Unique
8512AN4	8512AN10	99.9714	0	0	Not Unique
8512AN4	8512AN3	99.9971	0	1	Not Unique
8512AN4	8512AN2	99.8428	0	3429	Unique
8512DM1	8512AN10	99.9997	0	0	Not Unique
8512DM1	8512AN4	99.9963	0	0	Not Unique
8512DM1	8512AN3	99.9809	0	1	Not Unique
8512DM1	8512AN2	99.8186	0	3429	Unique
8512K3	8512SHA1	99.9918	0	9	Not Unique
8512K3	8512K7	99.9919	0	10	Not Unique
8512K3	8512K4	99.9915	0	14	Not Unique
8512K4	8512SHA1	99.9991	0	5	Not Unique
8512K4	8512K7	99.999	0	8	Not Unique
8512K4	8512K3	99.9915	0	14	Not Unique
8512K7	8512SHA1	99.9995	0	3	Not Unique
8512K7	8512K4	99.999	0	8	Not Unique
8512K7	8512K3	99.9921	0	10	Not Unique
8512SHA1	8512K7	99.9995	0	3	Not Unique
8512SHA1	8512K4	99.9991	0	6	Not Unique
8512SHA1	8512K3	99.9919	0	9	Not Unique
8513AN10.3	8513AN6	99.99	0	3	Not Unique
8513AN10.3	8513AN9.2	99.9986	0	7	Not Unique
8513AN6	8513AN10.3	99.986	0	3	Not Unique
8513AN6	8513AN9.2	99.9916	0	6	Not Unique
8513AN9.2	8513AN6	99.9911	0	6	Not Unique
8513AN9.2	8513AN10.3	99.9923	0	7	Not Unique
8514A10	8514A4	99.8904	0	273	Unique
8514A10	8514A6	99.3504	0	9344	Unique
8514A4	8514A10	99.9714	0	270	Unique
8514A4	8514A6	99.4622	0	8834	Unique
8514A6	8514A4	99.491	0	8820	Unique
8514A6	8514A10	99.4405	0	9313	Unique
8514A8	8514A9	99.4422	0	9727	Unique
8514A9	8514A8	99.4852	0	9727	Unique
8515ANT1	8515ANT3	99.9959	0	4	Not Unique
8515ANT3	8515ANT1	99.9974	0	6	Not Unique
8524A10	8524AN6	99.9942	0	163	Unique
8524AN6	8524A10	99.9811	0	163	Unique
8676A3	8676AN5	99.4237	0	10669	Unique
8676AN5	8676A3	99.4148	0	10674	Unique
8691AN1	8691OA9	99.9689	0	44	Not Unique
8691AN2	8691DM7	99.9964	0	14	Not Unique
8691DM7	8691AN2	99.9981	0	14	Not Unique
8691OA9	8691AN1	99.9905	0	45	Not Unique
