# Supplementary material for: The Genomic Landscape of Head and Neck Cancer-associated Streptococci
Source: Research Square preprint supplement (doi:10.21203/rs.3.rs-8400357/v1), 2026-01-09
Supplement: Supplementary file 2 [file 4efa227f86c33a4345909f2d.xlsx]

## Sheet: 29_core_gene
Supplementary Table 1: Core genes shared among unique Streptococcus isolates from HNC patients
Gene	8305AN4	8305OA4	8324OA8	8324OAN8	8355A1	8355AN1	8355AN2	8389O4	8389S2	8389SA4	8408OA3	8420OA2	8420OA3	8421A4	8421OA3	8431AN1	8431AN6	8451AG2	8451ANG2	8451ANT1	8451ANT4	8451AT5	8451AT6	8451AT7	8451AT8	8451DM12	8451DM4	8451DM8	8451DM9	8457AT2	8457OAN1	8457OAN3	8457OAN4	8462T2	8468AN4	8468DM2	8468DM31	8468OAN1	8468OAN3	8484A3	8484A8	8485A2	8485AN10	8485AN1	8485AN4	8485DM3	8497AN4	8497OA7	8497OA8
rpsJ	NHAIPL_08820	MLLHKN_09620	CICHAD_09515	JPPCCD_04360	JEJLFF_10170	EOEAFO_09870	AJLBDP_04315	ENDBJL_08385	BCOPPB_09205	AMINDN_10295	GHBPIN_06340	HNHNDD_04680	DMFPHE_08660	IBFBPF_06880	BFELMI_10345	EHFKIP_03120	AILIHG_06130	IHHFKC_07345	NHDEOJ_10340	MMMOHJ_07740	GFIEMM_07815	EAOBLI_07265	LKDAMH_08550	IPNEFN_11575	HOOHFL_06095	GBKAOJ_10230	ENKODN_09400	HCCONP_08905	MMMNBM_08820	KPJBNI_05320	IANIOK_05155	CIAFCG_08425	IGKMML_05280	DNBDFF_09370	AKAPBI_09725	NFOOIE_08690	BDCJPF_02465	LNJBNJ_04790	GGMAOG_08775	BLBGDH_10760	BCPBGJ_04130	KINNJL_02585	BAOEDD_08650	GOMLKM_07500	NOGKAP_00395	CPJEBP_07595	JDEAHB_05355	DAKCMC_06095	EBJDFK_08420
rplX	NHAIPL_08760	MLLHKN_09560	CICHAD_09455	JPPCCD_04285	JEJLFF_10110	EOEAFO_09810	AJLBDP_04255	ENDBJL_08325	BCOPPB_09145	AMINDN_10235	GHBPIN_06400	HNHNDD_04620	DMFPHE_08600	IBFBPF_06940	BFELMI_10285	EHFKIP_03180	AILIHG_06190	IHHFKC_07285	NHDEOJ_10280	MMMOHJ_07800	GFIEMM_07875	EAOBLI_07325	LKDAMH_08490	IPNEFN_11515	HOOHFL_06155	GBKAOJ_10170	ENKODN_09340	HCCONP_08845	MMMNBM_08760	KPJBNI_05260	IANIOK_05215	CIAFCG_08485	IGKMML_05340	DNBDFF_09310	AKAPBI_09665	NFOOIE_08750	BDCJPF_02405	LNJBNJ_04855	GGMAOG_08710	BLBGDH_10675	BCPBGJ_04070	KINNJL_02525	BAOEDD_08590	GOMLKM_07560	NOGKAP_00455	CPJEBP_07535	JDEAHB_05295	DAKCMC_06155	EBJDFK_08360
rplC	NHAIPL_08815	MLLHKN_09615	CICHAD_09510	JPPCCD_04355	JEJLFF_10165	EOEAFO_09865	AJLBDP_04310	ENDBJL_08380	BCOPPB_09200	AMINDN_10290	GHBPIN_06345	HNHNDD_04675	DMFPHE_08655	IBFBPF_06885	BFELMI_10340	EHFKIP_03125	AILIHG_06135	IHHFKC_07340	NHDEOJ_10335	MMMOHJ_07745	GFIEMM_07820	EAOBLI_07270	LKDAMH_08545	IPNEFN_11570	HOOHFL_06100	GBKAOJ_10225	ENKODN_09395	HCCONP_08900	MMMNBM_08815	KPJBNI_05315	IANIOK_05160	CIAFCG_08430	IGKMML_05285	DNBDFF_09365	AKAPBI_09720	NFOOIE_08695	BDCJPF_02460	LNJBNJ_04795	GGMAOG_08770	BLBGDH_10750;BLBGDH_10755	BCPBGJ_04125	KINNJL_02580	BAOEDD_08645	GOMLKM_07505	NOGKAP_00400	CPJEBP_07590	JDEAHB_05350	DAKCMC_06100	EBJDFK_08415
rpmD	NHAIPL_08725	MLLHKN_09525	CICHAD_09420	JPPCCD_04245	JEJLFF_10075	EOEAFO_09775	AJLBDP_04220	ENDBJL_08290	BCOPPB_09110	AMINDN_10200	GHBPIN_06435	HNHNDD_04585	DMFPHE_08565	IBFBPF_06975	BFELMI_10250	EHFKIP_03215	AILIHG_06225	IHHFKC_07250	NHDEOJ_10245	MMMOHJ_07835	GFIEMM_07910	EAOBLI_07360	LKDAMH_08455	IPNEFN_11475	HOOHFL_06190	GBKAOJ_10135	ENKODN_09305	HCCONP_08810	MMMNBM_08725	KPJBNI_05225	IANIOK_05250	CIAFCG_08520	IGKMML_05375	DNBDFF_09275	AKAPBI_09630	NFOOIE_08790	BDCJPF_02370	LNJBNJ_04895	GGMAOG_08675	BLBGDH_10635	BCPBGJ_04035	KINNJL_02490	BAOEDD_08555	GOMLKM_07595	NOGKAP_00490	CPJEBP_07495	JDEAHB_05260	DAKCMC_06190	EBJDFK_08325
rplN	NHAIPL_08765	MLLHKN_09565	CICHAD_09460	JPPCCD_04290;JPPCCD_04295	JEJLFF_10115	EOEAFO_09815	AJLBDP_04260	ENDBJL_08330	BCOPPB_09150	AMINDN_10240	GHBPIN_06395	HNHNDD_04625	DMFPHE_08605	IBFBPF_06935	BFELMI_10290	EHFKIP_03175	AILIHG_06185	IHHFKC_07290	NHDEOJ_10285	MMMOHJ_07795	GFIEMM_07870	EAOBLI_07320	LKDAMH_08495	IPNEFN_11520	HOOHFL_06150	GBKAOJ_10175	ENKODN_09345	HCCONP_08850	MMMNBM_08765	KPJBNI_05265	IANIOK_05210	CIAFCG_08480	IGKMML_05335	DNBDFF_09315	AKAPBI_09670	NFOOIE_08745	BDCJPF_02410	LNJBNJ_04850	GGMAOG_08715	BLBGDH_10685;BLBGDH_10680	BCPBGJ_04075	KINNJL_02530	BAOEDD_08595	GOMLKM_07555	NOGKAP_00450	CPJEBP_07540	JDEAHB_05300	DAKCMC_06150	EBJDFK_08365
rplE	NHAIPL_08755	MLLHKN_09555	CICHAD_09450	JPPCCD_04280;JPPCCD_04275	JEJLFF_10105	EOEAFO_09805	AJLBDP_04250	ENDBJL_08320	BCOPPB_09140	AMINDN_10230	GHBPIN_06405	HNHNDD_04615	DMFPHE_08595	IBFBPF_06945	BFELMI_10280	EHFKIP_03185	AILIHG_06195	IHHFKC_07280	NHDEOJ_10275	MMMOHJ_07805	GFIEMM_07880	EAOBLI_07330	LKDAMH_08485	IPNEFN_11510	HOOHFL_06160	GBKAOJ_10165	ENKODN_09335	HCCONP_08840	MMMNBM_08755	KPJBNI_05255	IANIOK_05220	CIAFCG_08490	IGKMML_05345	DNBDFF_09305	AKAPBI_09660	NFOOIE_08755	BDCJPF_02400	LNJBNJ_04860	GGMAOG_08705	BLBGDH_10670;BLBGDH_10665	BCPBGJ_04065	KINNJL_02520	BAOEDD_08585	GOMLKM_07565	NOGKAP_00460	CPJEBP_07530	JDEAHB_05290	DAKCMC_06160	EBJDFK_08355
rpsE	NHAIPL_08730	MLLHKN_09530	CICHAD_09425	JPPCCD_04250	JEJLFF_10080	EOEAFO_09780	AJLBDP_04225	ENDBJL_08295	BCOPPB_09115	AMINDN_10205	GHBPIN_06430	HNHNDD_04590	DMFPHE_08570	IBFBPF_06970	BFELMI_10255	EHFKIP_03210	AILIHG_06220	IHHFKC_07255	NHDEOJ_10250	MMMOHJ_07830	GFIEMM_07905	EAOBLI_07355	LKDAMH_08460	IPNEFN_11480	HOOHFL_06185	GBKAOJ_10140	ENKODN_09310	HCCONP_08815	MMMNBM_08730	KPJBNI_05230	IANIOK_05245	CIAFCG_08515	IGKMML_05370	DNBDFF_09280	AKAPBI_09635	NFOOIE_08785	BDCJPF_02375	LNJBNJ_04885;LNJBNJ_04890	GGMAOG_08680	BLBGDH_10640	BCPBGJ_04040	KINNJL_02495	BAOEDD_08560	GOMLKM_07590	NOGKAP_00485	CPJEBP_07500	JDEAHB_05265	DAKCMC_06185	EBJDFK_08330
rplD	NHAIPL_08810	MLLHKN_09610	CICHAD_09505	JPPCCD_04350	JEJLFF_10160	EOEAFO_09860	AJLBDP_04305	ENDBJL_08375	BCOPPB_09195	AMINDN_10285	GHBPIN_06350	HNHNDD_04670	DMFPHE_08650	IBFBPF_06890	BFELMI_10335	EHFKIP_03130	AILIHG_06140	IHHFKC_07335	NHDEOJ_10330	MMMOHJ_07750	GFIEMM_07825	EAOBLI_07275	LKDAMH_08540	IPNEFN_11565	HOOHFL_06105	GBKAOJ_10220	ENKODN_09390	HCCONP_08895	MMMNBM_08810	KPJBNI_05310	IANIOK_05165	CIAFCG_08435	IGKMML_05290	DNBDFF_09360	AKAPBI_09715	NFOOIE_08700	BDCJPF_02455	LNJBNJ_04800	GGMAOG_08765	BLBGDH_10745	BCPBGJ_04120	KINNJL_02575	BAOEDD_08640	GOMLKM_07510	NOGKAP_00405	CPJEBP_07585	JDEAHB_05345	DAKCMC_06105	EBJDFK_08410
secY	NHAIPL_08715	MLLHKN_09515	CICHAD_09410	JPPCCD_04230;JPPCCD_04235	JEJLFF_10065	EOEAFO_09765	AJLBDP_04210	ENDBJL_08280	BCOPPB_09100	AMINDN_10190	GHBPIN_06445	HNHNDD_04575	DMFPHE_08555	IBFBPF_06985	BFELMI_10240	EHFKIP_03225	AILIHG_06235	IHHFKC_07240	NHDEOJ_10235	MMMOHJ_07845	GFIEMM_07920	EAOBLI_07370	LKDAMH_08445	IPNEFN_11465	HOOHFL_06200	GBKAOJ_10125	ENKODN_09295	HCCONP_08800	MMMNBM_08715	KPJBNI_05215	IANIOK_05260	CIAFCG_08530	IGKMML_05385	DNBDFF_09265	AKAPBI_09620	NFOOIE_08800	BDCJPF_02360	LNJBNJ_04905	GGMAOG_08665	BLBGDH_10625	BCPBGJ_04025	KINNJL_02480	BAOEDD_08545	GOMLKM_07605	NOGKAP_00500	CPJEBP_07485	JDEAHB_05250	DAKCMC_06200	EBJDFK_08315
rpoA	NHAIPL_08685	MLLHKN_09485	CICHAD_09380	JPPCCD_04195	JEJLFF_10035	EOEAFO_09735	AJLBDP_04180	ENDBJL_08250	BCOPPB_09070	AMINDN_10160	GHBPIN_06475	HNHNDD_04545	DMFPHE_08525	IBFBPF_07015	BFELMI_10210	EHFKIP_03255	AILIHG_06265	IHHFKC_07210	NHDEOJ_10205	MMMOHJ_07875	GFIEMM_07950	EAOBLI_07400	LKDAMH_08415	IPNEFN_11435	HOOHFL_06230	GBKAOJ_10095	ENKODN_09265	HCCONP_08770	MMMNBM_08685	KPJBNI_05185	IANIOK_05290	CIAFCG_08560	IGKMML_05415	DNBDFF_09235	AKAPBI_09590	NFOOIE_08830	BDCJPF_02325	LNJBNJ_04935	GGMAOG_08635	BLBGDH_10595	BCPBGJ_03995	KINNJL_02450	BAOEDD_08515	GOMLKM_07635	NOGKAP_00530	CPJEBP_07455	JDEAHB_05220	DAKCMC_06230	EBJDFK_08285
rplO	NHAIPL_08720	MLLHKN_09520	CICHAD_09415	JPPCCD_04240	JEJLFF_10070	EOEAFO_09770	AJLBDP_04215	ENDBJL_08285	BCOPPB_09105	AMINDN_10195	GHBPIN_06440	HNHNDD_04580	DMFPHE_08560	IBFBPF_06980	BFELMI_10245	EHFKIP_03220	AILIHG_06230	IHHFKC_07245	NHDEOJ_10240	MMMOHJ_07840	GFIEMM_07915	EAOBLI_07365	LKDAMH_08450	IPNEFN_11470	HOOHFL_06195	GBKAOJ_10130	ENKODN_09300	HCCONP_08805	MMMNBM_08720	KPJBNI_05220	IANIOK_05255	CIAFCG_08525	IGKMML_05380	DNBDFF_09270	AKAPBI_09625	NFOOIE_08795	BDCJPF_02365	LNJBNJ_04900	GGMAOG_08670	BLBGDH_10630	BCPBGJ_04030	KINNJL_02485	BAOEDD_08550	GOMLKM_07600	NOGKAP_00495	CPJEBP_07490	JDEAHB_05255	DAKCMC_06195	EBJDFK_08320
rpsQ	NHAIPL_08770	MLLHKN_09570	CICHAD_09465	JPPCCD_04300	JEJLFF_10120	EOEAFO_09820	AJLBDP_04265	ENDBJL_08335	BCOPPB_09155	AMINDN_10245	GHBPIN_06390	HNHNDD_04630	DMFPHE_08610	IBFBPF_06930	BFELMI_10295	EHFKIP_03170	AILIHG_06180	IHHFKC_07295	NHDEOJ_10290	MMMOHJ_07790	GFIEMM_07865	EAOBLI_07315	LKDAMH_08500	IPNEFN_11525	HOOHFL_06145	GBKAOJ_10180	ENKODN_09350	HCCONP_08855	MMMNBM_08770	KPJBNI_05270	IANIOK_05205	CIAFCG_08475	IGKMML_05330	DNBDFF_09320	AKAPBI_09675	NFOOIE_08740	BDCJPF_02415	LNJBNJ_04845	GGMAOG_08720	BLBGDH_10690	BCPBGJ_04080	KINNJL_02535	BAOEDD_08600	GOMLKM_07550	NOGKAP_00445	CPJEBP_07545	JDEAHB_05305	DAKCMC_06145	EBJDFK_08370
rpsH	NHAIPL_08745	MLLHKN_09545	CICHAD_09440	JPPCCD_04265	JEJLFF_10095	EOEAFO_09795	AJLBDP_04240	ENDBJL_08310	BCOPPB_09130	AMINDN_10220	GHBPIN_06415	HNHNDD_04605	DMFPHE_08590	IBFBPF_06955	BFELMI_10270	EHFKIP_03195	AILIHG_06205	IHHFKC_07270	NHDEOJ_10265	MMMOHJ_07815	GFIEMM_07890	EAOBLI_07340	LKDAMH_08475	IPNEFN_11500	HOOHFL_06170	GBKAOJ_10155	ENKODN_09325	HCCONP_08835	MMMNBM_08745	KPJBNI_05245	IANIOK_05230	CIAFCG_08500	IGKMML_05355	DNBDFF_09295	AKAPBI_09650	NFOOIE_08765	BDCJPF_02390	LNJBNJ_04870	GGMAOG_08695	BLBGDH_10655	BCPBGJ_04055	KINNJL_02510	BAOEDD_08580	GOMLKM_07570	NOGKAP_00470	CPJEBP_07520	JDEAHB_05280	DAKCMC_06170	EBJDFK_08345
rplR	NHAIPL_08735	MLLHKN_09535	CICHAD_09430	JPPCCD_04255	JEJLFF_10085	EOEAFO_09785	AJLBDP_04230	ENDBJL_08300	BCOPPB_09120	AMINDN_10210	GHBPIN_06425	HNHNDD_04595	DMFPHE_08575	IBFBPF_06965	BFELMI_10260	EHFKIP_03205	AILIHG_06215	IHHFKC_07260	NHDEOJ_10255	MMMOHJ_07825	GFIEMM_07900	EAOBLI_07350	LKDAMH_08465	IPNEFN_11485	HOOHFL_06180	GBKAOJ_10145	ENKODN_09315	HCCONP_08820	MMMNBM_08735	KPJBNI_05235	IANIOK_05240	CIAFCG_08510	IGKMML_05365	DNBDFF_09285	AKAPBI_09640	NFOOIE_08780	BDCJPF_02380	LNJBNJ_04880	GGMAOG_08685	BLBGDH_10645	BCPBGJ_04045	KINNJL_02500	BAOEDD_08565	GOMLKM_07585	NOGKAP_00480	CPJEBP_07505	JDEAHB_05270	DAKCMC_06180	EBJDFK_08335
rplW	NHAIPL_08805	MLLHKN_09605	CICHAD_09500	JPPCCD_04345	JEJLFF_10155	EOEAFO_09855	AJLBDP_04300	ENDBJL_08370	BCOPPB_09190	AMINDN_10280	GHBPIN_06355	HNHNDD_04665	DMFPHE_08645	IBFBPF_06895	BFELMI_10330	EHFKIP_03135	AILIHG_06145	IHHFKC_07330	NHDEOJ_10325	MMMOHJ_07755	GFIEMM_07830	EAOBLI_07280	LKDAMH_08535	IPNEFN_11560	HOOHFL_06110	GBKAOJ_10215	ENKODN_09385	HCCONP_08890	MMMNBM_08805	KPJBNI_05305	IANIOK_05170	CIAFCG_08440	IGKMML_05295	DNBDFF_09355	AKAPBI_09710	NFOOIE_08705	BDCJPF_02450	LNJBNJ_04805	GGMAOG_08760	BLBGDH_10740	BCPBGJ_04115	KINNJL_02570	BAOEDD_08635	GOMLKM_07515	NOGKAP_00410	CPJEBP_07580	JDEAHB_05340	DAKCMC_06110	EBJDFK_08405
group_20010	NHAIPL_08710	MLLHKN_09510	CICHAD_09405	JPPCCD_04220;JPPCCD_04225	JEJLFF_10060	EOEAFO_09760	AJLBDP_04205	ENDBJL_08275	BCOPPB_09095	AMINDN_10185	GHBPIN_06450	HNHNDD_04570	DMFPHE_08550	IBFBPF_06990	BFELMI_10235	EHFKIP_03230	AILIHG_06240	IHHFKC_07235	NHDEOJ_10230	MMMOHJ_07850	GFIEMM_07925	EAOBLI_07375	LKDAMH_08440	IPNEFN_11460	HOOHFL_06205	GBKAOJ_10120	ENKODN_09290	HCCONP_08795	MMMNBM_08710	KPJBNI_05210	IANIOK_05265	CIAFCG_08535	IGKMML_05390	DNBDFF_09260	AKAPBI_09615	NFOOIE_08805	BDCJPF_02350	LNJBNJ_04910	GGMAOG_08660	BLBGDH_10620	BCPBGJ_04020	KINNJL_02475	BAOEDD_08540	GOMLKM_07610	NOGKAP_00505	CPJEBP_07480	JDEAHB_05245	DAKCMC_06205	EBJDFK_08310
rpsK	NHAIPL_08690	MLLHKN_09490	CICHAD_09385	JPPCCD_04200	JEJLFF_10040	EOEAFO_09740	AJLBDP_04185	ENDBJL_08255	BCOPPB_09075	AMINDN_10165	GHBPIN_06470	HNHNDD_04550	DMFPHE_08530	IBFBPF_07010	BFELMI_10215	EHFKIP_03250	AILIHG_06260	IHHFKC_07215	NHDEOJ_10210	MMMOHJ_07870	GFIEMM_07945	EAOBLI_07395	LKDAMH_08420	IPNEFN_11440	HOOHFL_06225	GBKAOJ_10100	ENKODN_09270	HCCONP_08775	MMMNBM_08690	KPJBNI_05190	IANIOK_05285	CIAFCG_08555	IGKMML_05410	DNBDFF_09240	AKAPBI_09595	NFOOIE_08825	BDCJPF_02330	LNJBNJ_04930	GGMAOG_08640	BLBGDH_10600	BCPBGJ_04000	KINNJL_02455	BAOEDD_08520	GOMLKM_07630	NOGKAP_00525	CPJEBP_07460	JDEAHB_05225	DAKCMC_06225	EBJDFK_08290
rpmC	NHAIPL_08775	MLLHKN_09575	CICHAD_09470	JPPCCD_04305	JEJLFF_10125	EOEAFO_09825	AJLBDP_04270	ENDBJL_08340	BCOPPB_09160	AMINDN_10250	GHBPIN_06385	HNHNDD_04635	DMFPHE_08615	IBFBPF_06925	BFELMI_10300	EHFKIP_03165	AILIHG_06175	IHHFKC_07300	NHDEOJ_10295	MMMOHJ_07785	GFIEMM_07860	EAOBLI_07310	LKDAMH_08505	IPNEFN_11530	HOOHFL_06140	GBKAOJ_10185	ENKODN_09355	HCCONP_08860	MMMNBM_08775	KPJBNI_05275	IANIOK_05200	CIAFCG_08470	IGKMML_05325	DNBDFF_09325	AKAPBI_09680	NFOOIE_08735	BDCJPF_02420	LNJBNJ_04840	GGMAOG_08725	BLBGDH_10695	BCPBGJ_04085	KINNJL_02540	BAOEDD_08605	GOMLKM_07545	NOGKAP_00440	CPJEBP_07550	JDEAHB_05310	DAKCMC_06140	EBJDFK_08375
rpsC	NHAIPL_08785	MLLHKN_09585	CICHAD_09480	JPPCCD_04320	JEJLFF_10135	EOEAFO_09835	AJLBDP_04280	ENDBJL_08350	BCOPPB_09170	AMINDN_10260	GHBPIN_06375	HNHNDD_04645	DMFPHE_08625	IBFBPF_06915	BFELMI_10310	EHFKIP_03155	AILIHG_06165	IHHFKC_07310	NHDEOJ_10305	MMMOHJ_07775	GFIEMM_07850	EAOBLI_07300	LKDAMH_08515	IPNEFN_11540	HOOHFL_06130	GBKAOJ_10195	ENKODN_09365	HCCONP_08870	MMMNBM_08785	KPJBNI_05285	IANIOK_05190	CIAFCG_08460	IGKMML_05315	DNBDFF_09335	AKAPBI_09690	NFOOIE_08725	BDCJPF_02430	LNJBNJ_04830	GGMAOG_08740	BLBGDH_10710;BLBGDH_10715	BCPBGJ_04095	KINNJL_02550	BAOEDD_08615	GOMLKM_07535	NOGKAP_00430	CPJEBP_07560	JDEAHB_05320	DAKCMC_06130	EBJDFK_08385
rplP	NHAIPL_08780	MLLHKN_09580	CICHAD_09475	JPPCCD_04310;JPPCCD_04315	JEJLFF_10130	EOEAFO_09830	AJLBDP_04275	ENDBJL_08345	BCOPPB_09165	AMINDN_10255	GHBPIN_06380	HNHNDD_04640	DMFPHE_08620	IBFBPF_06920	BFELMI_10305	EHFKIP_03160	AILIHG_06170	IHHFKC_07305	NHDEOJ_10300	MMMOHJ_07780	GFIEMM_07855	EAOBLI_07305	LKDAMH_08510	IPNEFN_11535	HOOHFL_06135	GBKAOJ_10190	ENKODN_09360	HCCONP_08865	MMMNBM_08780	KPJBNI_05280	IANIOK_05195	CIAFCG_08465	IGKMML_05320	DNBDFF_09330	AKAPBI_09685	NFOOIE_08730	BDCJPF_02425	LNJBNJ_04835	GGMAOG_08735;GGMAOG_08730	BLBGDH_10705;BLBGDH_10700	BCPBGJ_04090	KINNJL_02545	BAOEDD_08610	GOMLKM_07540	NOGKAP_00435	CPJEBP_07555	JDEAHB_05315	DAKCMC_06135	EBJDFK_08380
rplF	NHAIPL_08740	MLLHKN_09540	CICHAD_09435	JPPCCD_04260	JEJLFF_10090	EOEAFO_09790	AJLBDP_04235	ENDBJL_08305	BCOPPB_09125	AMINDN_10215	GHBPIN_06420	HNHNDD_04600	DMFPHE_08580	IBFBPF_06960	BFELMI_10265	EHFKIP_03200	AILIHG_06210	IHHFKC_07265	NHDEOJ_10260	MMMOHJ_07820	GFIEMM_07895	EAOBLI_07345	LKDAMH_08470	IPNEFN_11490	HOOHFL_06175	GBKAOJ_10150	ENKODN_09320	HCCONP_08825	MMMNBM_08740	KPJBNI_05240	IANIOK_05235	CIAFCG_08505	IGKMML_05360	DNBDFF_09290	AKAPBI_09645	NFOOIE_08775	BDCJPF_02385	LNJBNJ_04875	GGMAOG_08690	BLBGDH_10650	BCPBGJ_04050	KINNJL_02505	BAOEDD_08570	GOMLKM_07580	NOGKAP_00475	CPJEBP_07510	JDEAHB_05275	DAKCMC_06175	EBJDFK_08340
rplB	NHAIPL_08800	MLLHKN_09600	CICHAD_09495	JPPCCD_04335;JPPCCD_04340	JEJLFF_10150	EOEAFO_09850	AJLBDP_04295	ENDBJL_08365	BCOPPB_09185	AMINDN_10275	GHBPIN_06360	HNHNDD_04660	DMFPHE_08640	IBFBPF_06900	BFELMI_10325	EHFKIP_03140	AILIHG_06150	IHHFKC_07325	NHDEOJ_10320	MMMOHJ_07760	GFIEMM_07835	EAOBLI_07285	LKDAMH_08530	IPNEFN_11555	HOOHFL_06115	GBKAOJ_10210	ENKODN_09380	HCCONP_08885	MMMNBM_08800	KPJBNI_05300	IANIOK_05175	CIAFCG_08445	IGKMML_05300	DNBDFF_09350	AKAPBI_09705	NFOOIE_08710	BDCJPF_02445	LNJBNJ_04810;LNJBNJ_04815	GGMAOG_08755	BLBGDH_10730;BLBGDH_10735	BCPBGJ_04110	KINNJL_02565	BAOEDD_08630	GOMLKM_07520	NOGKAP_00415	CPJEBP_07575	JDEAHB_05335	DAKCMC_06115	EBJDFK_08400
rplV	NHAIPL_08790	MLLHKN_09590	CICHAD_09485	JPPCCD_04325	JEJLFF_10140	EOEAFO_09840	AJLBDP_04285	ENDBJL_08355	BCOPPB_09175	AMINDN_10265	GHBPIN_06370	HNHNDD_04650	DMFPHE_08630	IBFBPF_06910	BFELMI_10315	EHFKIP_03150	AILIHG_06160	IHHFKC_07315	NHDEOJ_10310	MMMOHJ_07770	GFIEMM_07845	EAOBLI_07295	LKDAMH_08520	IPNEFN_11545	HOOHFL_06125	GBKAOJ_10200	ENKODN_09370	HCCONP_08875	MMMNBM_08790	KPJBNI_05290	IANIOK_05185	CIAFCG_08455	IGKMML_05310	DNBDFF_09340	AKAPBI_09695	NFOOIE_08720	BDCJPF_02435	LNJBNJ_04825	GGMAOG_08745	BLBGDH_10720	BCPBGJ_04100	KINNJL_02555	BAOEDD_08620	GOMLKM_07530	NOGKAP_00425	CPJEBP_07565	JDEAHB_05325	DAKCMC_06125	EBJDFK_08390
infA	NHAIPL_08705	MLLHKN_09505	CICHAD_09400	JPPCCD_04215	JEJLFF_10055	EOEAFO_09755	AJLBDP_04200	ENDBJL_08270	BCOPPB_09090	AMINDN_10180	GHBPIN_06455	HNHNDD_04565	DMFPHE_08545	IBFBPF_06995	BFELMI_10230	EHFKIP_03235	AILIHG_06245	IHHFKC_07230	NHDEOJ_10225	MMMOHJ_07855	GFIEMM_07930	EAOBLI_07380	LKDAMH_08435	IPNEFN_11455	HOOHFL_06210	GBKAOJ_10115	ENKODN_09285	HCCONP_08790	MMMNBM_08705	KPJBNI_05205	IANIOK_05270	CIAFCG_08540	IGKMML_05395	DNBDFF_09255	AKAPBI_09610	NFOOIE_08810	BDCJPF_02345	LNJBNJ_04915	GGMAOG_08655	BLBGDH_10615	BCPBGJ_04015	KINNJL_02470	BAOEDD_08535	GOMLKM_07615	NOGKAP_00510	CPJEBP_07475	JDEAHB_05240	DAKCMC_06210	EBJDFK_08305
rpsM	NHAIPL_08695	MLLHKN_09495	CICHAD_09390	JPPCCD_04205	JEJLFF_10045	EOEAFO_09745	AJLBDP_04190	ENDBJL_08260	BCOPPB_09080	AMINDN_10170	GHBPIN_06465	HNHNDD_04555	DMFPHE_08535	IBFBPF_07005	BFELMI_10220	EHFKIP_03245	AILIHG_06255	IHHFKC_07220	NHDEOJ_10215	MMMOHJ_07865	GFIEMM_07940	EAOBLI_07390	LKDAMH_08425	IPNEFN_11445	HOOHFL_06220	GBKAOJ_10105	ENKODN_09275	HCCONP_08780	MMMNBM_08695	KPJBNI_05195	IANIOK_05280	CIAFCG_08550	IGKMML_05405	DNBDFF_09245	AKAPBI_09600	NFOOIE_08820	BDCJPF_02335	LNJBNJ_04925	GGMAOG_08645	BLBGDH_10605	BCPBGJ_04005	KINNJL_02460	BAOEDD_08525	GOMLKM_07625	NOGKAP_00520	CPJEBP_07465	JDEAHB_05230	DAKCMC_06220	EBJDFK_08295
rpsS	NHAIPL_08795	MLLHKN_09595	CICHAD_09490	JPPCCD_04330	JEJLFF_10145	EOEAFO_09845	AJLBDP_04290	ENDBJL_08360	BCOPPB_09180	AMINDN_10270	GHBPIN_06365	HNHNDD_04655	DMFPHE_08635	IBFBPF_06905	BFELMI_10320	EHFKIP_03145	AILIHG_06155	IHHFKC_07320	NHDEOJ_10315	MMMOHJ_07765	GFIEMM_07840	EAOBLI_07290	LKDAMH_08525	IPNEFN_11550	HOOHFL_06120	GBKAOJ_10205	ENKODN_09375	HCCONP_08880	MMMNBM_08795	KPJBNI_05295	IANIOK_05180	CIAFCG_08450	IGKMML_05305	DNBDFF_09345	AKAPBI_09700	NFOOIE_08715	BDCJPF_02440	LNJBNJ_04820	GGMAOG_08750	BLBGDH_10725	BCPBGJ_04105	KINNJL_02560	BAOEDD_08625	GOMLKM_07525	NOGKAP_00420	CPJEBP_07570	JDEAHB_05330	DAKCMC_06120	EBJDFK_08395
rpmJ	NHAIPL_08700	MLLHKN_09500	CICHAD_09395	JPPCCD_04210	JEJLFF_10050	EOEAFO_09750	AJLBDP_04195	ENDBJL_08265	BCOPPB_09085	AMINDN_10175	GHBPIN_06460	HNHNDD_04560	DMFPHE_08540	IBFBPF_07000	BFELMI_10225	EHFKIP_03240	AILIHG_06250	IHHFKC_07225	NHDEOJ_10220	MMMOHJ_07860	GFIEMM_07935	EAOBLI_07385	LKDAMH_08430	IPNEFN_11450	HOOHFL_06215	GBKAOJ_10110	ENKODN_09280	HCCONP_08785	MMMNBM_08700	KPJBNI_05200	IANIOK_05275	CIAFCG_08545	IGKMML_05400	DNBDFF_09250	AKAPBI_09605	NFOOIE_08815	BDCJPF_02340	LNJBNJ_04920	GGMAOG_08650	BLBGDH_10610	BCPBGJ_04010	KINNJL_02465	BAOEDD_08530	GOMLKM_07620	NOGKAP_00515	CPJEBP_07470	JDEAHB_05235	DAKCMC_06215	EBJDFK_08300
gpsA	NHAIPL_00835	MLLHKN_01075	CICHAD_01010	JPPCCD_06340	JEJLFF_09600	EOEAFO_09335	AJLBDP_03745	ENDBJL_00765	BCOPPB_01165	AMINDN_09875	GHBPIN_04820	HNHNDD_07620	DMFPHE_08250	IBFBPF_00840	BFELMI_09765	EHFKIP_10085	AILIHG_09715	IHHFKC_06735	NHDEOJ_00825	MMMOHJ_06420	GFIEMM_03570	EAOBLI_06435	LKDAMH_00805	IPNEFN_01130	HOOHFL_09860	GBKAOJ_02185	ENKODN_00690	HCCONP_08495	MMMNBM_00730	KPJBNI_04890	IANIOK_09390	CIAFCG_02955	IGKMML_03765	DNBDFF_01025	AKAPBI_05445	NFOOIE_03835	BDCJPF_09155	LNJBNJ_03170	GGMAOG_00840	BLBGDH_01005	BCPBGJ_05990	KINNJL_09495	BAOEDD_08205	GOMLKM_07910	NOGKAP_07335	CPJEBP_09200	JDEAHB_08515	DAKCMC_06795	EBJDFK_00440
galU	NHAIPL_00830	MLLHKN_01070	CICHAD_01005	JPPCCD_06335	JEJLFF_09605	EOEAFO_09340	AJLBDP_03750	ENDBJL_00760	BCOPPB_01160	AMINDN_09880	GHBPIN_04825	HNHNDD_07625	DMFPHE_08255	IBFBPF_00835	BFELMI_09770	EHFKIP_10090	AILIHG_09720	IHHFKC_06740	NHDEOJ_00820	MMMOHJ_06415	GFIEMM_03575	EAOBLI_06440	LKDAMH_00800	IPNEFN_01125	HOOHFL_09865	GBKAOJ_02190	ENKODN_00685	HCCONP_08500	MMMNBM_00725	KPJBNI_04895	IANIOK_09385	CIAFCG_02960	IGKMML_03760	DNBDFF_01020	AKAPBI_05450	NFOOIE_03830	BDCJPF_09160	LNJBNJ_03175	GGMAOG_00835	BLBGDH_01000	BCPBGJ_05985	KINNJL_09490	BAOEDD_08215;BAOEDD_08210	GOMLKM_07905	NOGKAP_07340	CPJEBP_09195	JDEAHB_08520	DAKCMC_06790	EBJDFK_00435
[truncated: 52 more columns]

## Sheet: supplement table S3_pangenome d
Supplementary Table 2: Species-level genomic, core-genome, and pangenome characteristics
Species	Num_Isolates	Num_Core_Genes	Pangenome_Size	Avg_Genome_Size	SD_Genome_Size	Avg_GC_Content	SD_GC_Content	Avg_Core_Gene_Length	SD_Core_Gene_Length	Total_Core_Gene_Length
Strep. anginosus	7	1430	3049	1.99351e+06	84166.7	38.7456	0.237662	936.852	612.763	1338762
Strep. constellatus	4	1500	2330	1917239	82803.8	37.9883	0.0631711	936.754	641.405	1402320
Strep. gordonii	6	1745	2757	2.21927e+06	42328.2	40.3652	0.0592201	959.728	674.787	1673766
Strep. hominis	6	1423	2740	1921256	69324	38.8892	0.120668	943.339	592.452	1342371
Strep. infantis	8	1287	2864	1.85923e+06	159339	39.5183	0.0827093	950.476	631.916	1223262
Strep. mitis	15	1294	4035	1.97072e+06	75685.7	40.1364	0.138861	947.884	606.389	1225614
Strep. oralis	8	1326	3707	2.00951e+06	71136.3	40.9939	0.201193	963.29	682.254	1277322
Strep. parasanguinis	9	1445	3709	2.17043e+06	93225.8	41.7266	0.224515	723.681	480.069	1045719
Strep. salivarius	6	1580	2813	2.21857e+06	59310.8	39.8376	0.108041	973.85	673.242	1536735
Strep. sanguinis	2	1906	2767	2.4431e+06	8263.96	43.0038	0.357442	950.394	687.409	1810500
Strep. vestibularis	3	1812	2067	2.0445e+06	36991.4	39.5436	0.0487413	919.659	770.382	1662744
Strep. xiaochunlingii	2	1648	2245	2009608	86199.1	42.0043	0.280079	869.066	649.716	1428744
Strep.BHI_8	2	1808	2364	2.17874e+06	157434	39.6859	0.358164	931.96	682.573	1680324

## Sheet: species_core_pan_RAREFIED_n5_B1
Supplementary Table 3: Species-level core genome, pangenome size, and genomic fraction statistics
Species	n_isolates_total	core_mean	core_sd	pan_mean	pan_sd	core_frac_mean	core_frac_sd
Strep. anginosus	7	1459.35	21.576	2793	148.286	0.52436	0.0356304
Strep. gordonii	6	1760.94	10.36	2663.8	70.1168	0.661583	0.0201307
Strep. hominis	6	1436.58	18.555	2608.45	75.2526	0.551415	0.0237509
Strep. infantis	8	1315.02	17.1317	2550.74	112.232	0.516782	0.0288791
Strep. mitis	15	1354.85	33.1456	2932.75	181.767	0.464452	0.0414755
Strep. oralis	8	1365.49	24.288	3103	177.898	0.441945	0.0336105
Strep. parasanguinis	9	1490.38	16.618	3128.54	146.311	0.477598	0.0266502
Strep. salivarius	6	1593.05	15.0839	2723.45	73.641	0.585448	0.0195738

## Sheet: Cluster 1
Supplementary Table 4: Core and accessory genes identified in Cluster 1
Gene	n_present	core_percentage	gene_type
aCT	10	100	Core
aF0785	1	10	Accessory
aF2118	2	20	Accessory
aIM24	0	0	Accessory
aRA1	10	100	Core
aRO8	0	0	Accessory
aac6	0	0	Accessory
aarF	10	100	Core
abcX	0	0	Accessory
abcf	10	100	Core
abgB	10	100	Core
abiF	0	0	Accessory
abiH	0	0	Accessory
abiV	0	0	Accessory
abpA	0	0	Accessory
abrB	0	0	Accessory
accA	10	100	Core
accB	10	100	Core
accC	0	0	Accessory
accD	10	100	Core
aceF	0	0	Accessory
ackA	0	0	Accessory
acm	0	0	Accessory
acnA	0	0	Accessory
acoA	0	0	Accessory
acoA~~~pdhA	0	0	Accessory
acoB	0	0	Accessory
acpA	0	0	Accessory
acpA~~~acpB	0	0	Accessory
acpB	0	0	Accessory
acpP	0	0	Accessory
acpS	0	0	Accessory
acrA	0	0	Accessory
acrIIA6	0	0	Accessory
acrR	0	0	Accessory
acrR~~~tetR	10	100	Core
acuB	9	90	Accessory
acuB~~~cBS	0	0	Accessory
acuI~~~yhfP	1	10	Accessory
acyP	0	0	Accessory
adaA	0	0	Accessory
adaB	0	0	Accessory
adcA	0	0	Accessory
adcC	0	0	Accessory
add	0	0	Accessory
addA	0	0	Accessory
adhE	0	0	Accessory
adhP	0	0	Accessory
adk	0	0	Accessory
aes	0	0	Accessory
afuA	0	0	Accessory
afuC	0	0	Accessory
aga	0	0	Accessory
agaB	0	0	Accessory
agaS	0	0	Accessory
agrC	3	30	Accessory
aguA	0	0	Accessory
aguB	0	0	Accessory
ahpC	10	100	Core
ahpF	0	0	Accessory
alaS	0	0	Accessory
albA	0	0	Accessory
albE~~~pqqL	0	0	Accessory
albF	0	0	Accessory
albF~~~pqqL	0	0	Accessory
ald	7	70	Accessory
aliA	0	0	Accessory
aliA~~~sarA~~~oppA	0	0	Accessory
alkD	0	0	Accessory
alpA	3	30	Accessory
alr	0	0	Accessory
alr~~~acpS	0	0	Accessory
alsS	0	0	Accessory
alsT	0	0	Accessory
alwI	0	0	Accessory
amaP	0	0	Accessory
amiA	0	0	Accessory
amiF~~~oppF	0	0	Accessory
ampC	10	100	Core
ampH	0	0	Accessory
ampH~~~ampC	0	0	Accessory
ampS~~~pepS	10	100	Core
amrA	0	0	Accessory
amsE	0	0	Accessory
amt	10	100	Core
amtB	0	0	Accessory
amyA	0	0	Accessory
ansA	0	0	Accessory
ansP	10	100	Core
ant6	0	0	Accessory
apbE	10	100	Core
apeA	0	0	Accessory
aph3IIIa	0	0	Accessory
aprE	9	90	Accessory
apt	0	0	Accessory
araC	0	0	Accessory
araC~~~tetD	0	0	Accessory
araD	0	0	Accessory
araJ	0	0	Accessory
araQ	0	0	Accessory
araQ~~~ugpE	0	0	Accessory
arcA	0	0	Accessory
arcC	0	0	Accessory
arcR	0	0	Accessory
arcT	0	0	Accessory
ardA	0	0	Accessory
argA~~~ywnH	0	0	Accessory
argB	0	0	Accessory
argC	0	0	Accessory
argD	0	0	Accessory
argE	0	0	Accessory
argF	0	0	Accessory
argG	0	0	Accessory
argH	0	0	Accessory
argJ	0	0	Accessory
argR	0	0	Accessory
argS	0	0	Accessory
arlR	0	0	Accessory
arlR~~~csrR~~~ompR	0	0	Accessory
aroA	0	0	Accessory
aroB	0	0	Accessory
aroB~~~aroE	0	0	Accessory
aroC	0	0	Accessory
aroD	0	0	Accessory
aroE	0	0	Accessory
aroG1	0	0	Accessory
aroK	0	0	Accessory
arpU	5	50	Accessory
arsC	0	0	Accessory
arsC~~~adaB	0	0	Accessory
arsR	0	0	Accessory
artM	0	0	Accessory
asbA	0	0	Accessory
ascB	0	0	Accessory
asd	10	100	Core
asnA	10	100	Core
asnS	0	0	Accessory
asp1	0	0	Accessory
asp2	0	0	Accessory
asp3	0	0	Accessory
asp4	0	0	Accessory
asp5	0	0	Accessory
aspB	10	100	Core
aspB~~~alaT	10	100	Core
aspS	10	100	Core
atoS	0	0	Accessory
atpA	10	100	Core
atpB	0	0	Accessory
atpC	10	100	Core
atpD	10	100	Core
atpE	0	0	Accessory
atpF	0	0	Accessory
atpG	10	100	Core
atpH	0	0	Accessory
avrD	0	0	Accessory
axe1	0	0	Accessory
azlC	0	0	Accessory
azlC~~~ygaZ	0	0	Accessory
azlD	0	0	Accessory
azlD2	0	0	Accessory
baeS	3	30	Accessory
bcc	0	0	Accessory
bceA	0	0	Accessory
bceB	10	100	Core
bceB~~~yxdM	1	10	Accessory
bcrC	0	0	Accessory
bcsA	0	0	Accessory
bcsZ	0	0	Accessory
beeE	0	0	Accessory
bepR	0	0	Accessory
bet	0	0	Accessory
betI~~~tetR	0	0	Accessory
bglB	0	0	Accessory
bglB~~~gmuD~~~bglA	0	0	Accessory
bglG	0	0	Accessory
bglG~~~licT	0	0	Accessory
bglH	0	0	Accessory
bgrS	0	0	Accessory
bhtF	5	50	Accessory
bigG	0	0	Accessory
bioF	1	10	Accessory
bioH	7	70	Accessory
bioY	0	0	Accessory
birA	0	0	Accessory
blaR1	0	0	Accessory
blpA	0	0	Accessory
blpC	0	0	Accessory
blpI	0	0	Accessory
blpJ	0	0	Accessory
blpL	0	0	Accessory
blpM	0	0	Accessory
blpO	0	0	Accessory
blpP	0	0	Accessory
blpR	3	30	Accessory
blpS~~~lytR~~~lytT	0	0	Accessory
blpT	0	0	Accessory
blpX	0	0	Accessory
blpY	0	0	Accessory
blpZ	0	0	Accessory
bofA	0	0	Accessory
briC	0	0	Accessory
brkB	0	0	Accessory
brkB~~~yihY	0	0	Accessory
brnQ	10	100	Core
brpA	0	0	Accessory
btuD	0	0	Accessory
btuE	7	70	Accessory
budA	0	0	Accessory
cDA1	0	0	Accessory
cadA	10	100	Core
cadD	4	40	Accessory
cadX	3	30	Accessory
caiA	0	0	Accessory
caiD~~~fabM	10	100	Core
capA	0	0	Accessory
capD	0	0	Accessory
carA	0	0	Accessory
carB	10	100	Core
cas1	0	0	Accessory
cas10	0	0	Accessory
cas1c	0	0	Accessory
cas2	0	0	Accessory
cas3	0	0	Accessory
cas4	0	0	Accessory
cas5c	0	0	Accessory
cas6	0	0	Accessory
cas7c	0	0	Accessory
cas8c	0	0	Accessory
cas9	0	0	Accessory
catE	10	100	Core
cbbX	0	0	Accessory
cbiA	0	0	Accessory
cbiB	0	0	Accessory
cbiC	0	0	Accessory
cbiD	0	0	Accessory
cbiE	0	0	Accessory
cbiF	0	0	Accessory
cbiG	0	0	Accessory
cbiM	0	0	Accessory
cbiN	0	0	Accessory
cbiO	0	0	Accessory
cbiQ	0	0	Accessory
cbiT	0	0	Accessory
cbpB	0	0	Accessory
cbpC	0	0	Accessory
cbpD	0	0	Accessory
cbpD2	0	0	Accessory
cbpE	0	0	Accessory
cbpF~~~cbpJ	0	0	Accessory
cbpI	0	0	Accessory
cbrC	0	0	Accessory
cca	0	0	Accessory
ccc1	10	100	Core
ccdA	0	0	Accessory
ccdA2	0	0	Accessory
ccdA2~~~ccdA	0	0	Accessory
ccmA	0	0	Accessory
ccmD	0	0	Accessory
ccmE	0	0	Accessory
ccmK	0	0	Accessory
ccoS	0	0	Accessory
ccpA	0	0	Accessory
ccpA~~~lacI	0	0	Accessory
ccpN	0	0	Accessory
ccrZ	0	0	Accessory
cdaA	0	0	Accessory
cdaR~~~ybbR	0	0	Accessory
cdd	10	100	Core
cdiI	0	0	Accessory
cdsA	0	0	Accessory
celA	0	0	Accessory
celA~~~comEA	0	0	Accessory
celB	0	0	Accessory
celB~~~comEC	0	0	Accessory
celC	0	0	Accessory
celC~~~bigG	0	0	Accessory
ceuA	0	0	Accessory
ceuB	0	0	Accessory
ceuC	0	0	Accessory
ceuD	0	0	Accessory
chaP	1	10	Accessory
ciaH~~~baeS	10	100	Core
ciaR	0	0	Accessory
cibA	0	0	Accessory
cibB	0	0	Accessory
cinA	10	100	Core
citA	1	10	Accessory
citB	0	0	Accessory
citB~~~luxR~~~degU	10	100	Core
citC	0	0	Accessory
citD	0	0	Accessory
citE	0	0	Accessory
citF	0	0	Accessory
citG	0	0	Accessory
citM	0	0	Accessory
citS	0	0	Accessory
citS~~~yesM	0	0	Accessory
citX	0	0	Accessory
citZ	0	0	Accessory
clcA	0	0	Accessory
clcB	10	100	Core
clpA	0	0	Accessory
clpA~~~clpC	10	100	Core
clpA~~~clpE	0	0	Accessory
clpB	0	0	Accessory
clpC	0	0	Accessory
clpC1	0	0	Accessory
clpE	0	0	Accessory
clpL	0	0	Accessory
clpL~~~clpA	10	100	Core
clpP	0	0	Accessory
clpX	0	0	Accessory
cls	0	0	Accessory
cmk	10	100	Core
cmr4	0	0	Accessory
coaA	0	0	Accessory
coaB	0	0	Accessory
coaC	0	0	Accessory
coaD	0	0	Accessory
coaE	0	0	Accessory
cobA	0	0	Accessory
cobB	0	0	Accessory
cobD	0	0	Accessory
cobI	0	0	Accessory
cobJ	0	0	Accessory
cobK	0	0	Accessory
cobN	0	0	Accessory
cobQ	0	0	Accessory
cobQ~~~gatD	10	100	Core
cobS	0	0	Accessory
cobT	0	0	Accessory
cobU	0	0	Accessory
codY	10	100	Core
cof	10	100	Core
cofD	10	100	Core
cof~~~ybjI	0	0	Accessory
coiA	0	0	Accessory
coiA~~~prsA	0	0	Accessory
comA	0	0	Accessory
comA~~~pncF	0	0	Accessory
comB	0	0	Accessory
comC	0	0	Accessory
comD	0	0	Accessory
comD~~~natK	0	0	Accessory
comD~~~yesM~~~dcuS	0	0	Accessory
comE	0	0	Accessory
comEA	0	0	Accessory
comEB	0	0	Accessory
comEC	0	0	Accessory
comE~~~comEB	0	0	Accessory
comF	0	0	Accessory
comFA	0	0	Accessory
comFA~~~comF	10	100	Core
comFC	10	100	Core
comF~~~comFC	0	0	Accessory
comF~~~recG~~~comFA	0	0	Accessory
comGA	0	0	Accessory
comGA~~~comGB	0	0	Accessory
comGB	0	0	Accessory
comGC	0	0	Accessory
comGD	0	0	Accessory
comGE	0	0	Accessory
comGF	0	0	Accessory
comGF~~~comGG	0	0	Accessory
comGG	0	0	Accessory
comM	0	0	Accessory
comP	0	0	Accessory
comR	0	0	Accessory
comR1	0	0	Accessory
comW	0	0	Accessory
comX	0	0	Accessory
comX1	0	0	Accessory
comX1~~~comX	0	0	Accessory
comX2	0	0	Accessory
comX2~~~comX1	0	0	Accessory
copG	0	0	Accessory
copY	0	0	Accessory
copZ	0	0	Accessory
corA	10	100	Core
cotH	0	0	Accessory
cotS	10	100	Core
cotS~~~licA	0	0	Accessory
cpdA	0	0	Accessory
cpdB	0	0	Accessory
cpoA	0	0	Accessory
cppA	10	100	Core
cps2a	10	100	Core
cps4B	10	100	Core
cpsC	0	0	Accessory
cpsD	0	0	Accessory
cpsD~~~mrp	10	100	Core
cpsE~~~wcaJ~~~epsL	10	100	Core
cpsI	0	0	Accessory
cpsJ	3	30	Accessory
cpsL	0	0	Accessory
cpsO~~~epsJ	0	0	Accessory
crcB	0	0	Accessory
crcB~~~fluC	0	0	Accessory
crp	0	0	Accessory
csbD	0	0	Accessory
cshA	0	0	Accessory
cshA~~~srmB	10	100	Core
cshA~~~srmB~~~yfmL	10	100	Core
cshB	3	30	Accessory
cshB~~~srmB	0	0	Accessory
csm2	1	10	Accessory
csm3	1	10	Accessory
csm4	0	0	Accessory
csm5	1	10	Accessory
csm6	0	0	Accessory
csn2	0	0	Accessory
csoR	0	0	Accessory
ctpA	0	0	Accessory
ctsR	10	100	Core
cutC	0	0	Accessory
cutD	0	0	Accessory
cvfB	0	0	Accessory
cvpA	0	0	Accessory
cwlA	0	0	Accessory
cwlO	0	0	Accessory
cydC	0	0	Accessory
cydD	0	0	Accessory
cylB	0	0	Accessory
cynT	0	0	Accessory
cynX	0	0	Accessory
cysA	0	0	Accessory
cysB	0	0	Accessory
cysE	0	0	Accessory
cysE~~~epsC~~~rimI	10	100	Core
cysK	0	0	Accessory
cysS	10	100	Core
czcD	10	100	Core
dAP2	0	0	Accessory
dLH	0	0	Accessory
dacC	0	0	Accessory
dadA	0	0	Accessory
dam	0	0	Accessory
dapA	10	100	Core
dapB	0	0	Accessory
dapD	10	100	Core
darT	0	0	Accessory
dcm	0	0	Accessory
ddl	0	0	Accessory
dedA	0	0	Accessory
def	0	0	Accessory
degA	0	0	Accessory
degP	0	0	Accessory
degV	0	0	Accessory
degV~~~trmH	0	0	Accessory
deoB	10	100	Core
deoC	10	100	Core
deoD	10	100	Core
deoR	0	0	Accessory
deoR~~~glpR	0	0	Accessory
deoR~~~ulaR~~~glpR	0	0	Accessory
der	10	100	Core
dexB	0	0	Accessory
dgkA	0	0	Accessory
dhaK	0	0	Accessory
dhaK~~~dhaQ	0	0	Accessory
dhaL	0	0	Accessory
dhaM	0	0	Accessory
dhaQ	0	0	Accessory
dhaS	0	0	Accessory
dhfR	0	0	Accessory
dicA	0	0	Accessory
dinB	0	0	Accessory
dinD	0	0	Accessory
dinF	0	0	Accessory
dinG	0	0	Accessory
divIB	0	0	Accessory
divIVA	0	0	Accessory
dltA	10	100	Core
dltB	0	0	Accessory
dltC	10	100	Core
dltD	0	0	Accessory
dltR	0	0	Accessory
dnaA	0	0	Accessory
dnaB	0	0	Accessory
dnaB~~~dnaD	0	0	Accessory
dnaC	1	10	Accessory
dnaD	0	0	Accessory
dnaE	0	0	Accessory
dnaG	0	0	Accessory
dnaI	0	0	Accessory
dnaJ	0	0	Accessory
dnaK	0	0	Accessory
dnaN	0	0	Accessory
dnaQ	0	0	Accessory
dnaQ~~~dinG~~~polC	0	0	Accessory
dnaQ~~~polC	10	100	Core
dnaX	0	0	Accessory
doc	0	0	Accessory
dpiB	0	0	Accessory
dpnA	0	0	Accessory
dpnD	0	0	Accessory
dpnI	0	0	Accessory
dpnM	0	0	Accessory
dppB	3	30	Accessory
dppC	0	0	Accessory
dppD	10	100	Core
dprA	0	0	Accessory
dps	0	0	Accessory
draG	0	0	Accessory
drrA	0	0	Accessory
drrB	4	40	Accessory
dsbD	0	0	Accessory
dtd	0	0	Accessory
dusB	0	0	Accessory
dut	0	0	Accessory
eCFS	0	0	Accessory
eMAP	10	100	Core
eRG12	0	0	Accessory
eamA	0	0	Accessory
eamA~~~rhaT	0	0	Accessory
eamA~~~yicL	0	0	Accessory
ebgC	0	0	Accessory
ebhA	0	0	Accessory
ebsA	0	0	Accessory
ebsC	0	0	Accessory
ecfA1	0	0	Accessory
ecfA2	0	0	Accessory
ecfT	0	0	Accessory
ecfT~~~mtsC~~~cbiQ	0	0	Accessory
ecsA~~~ccmA	0	0	Accessory
ecsB	0	0	Accessory
ecsC	0	0	Accessory
eda	0	0	Accessory
efeB	0	0	Accessory
efeO	0	0	Accessory
efeU	0	0	Accessory
efiE	0	0	Accessory
efp	0	0	Accessory
egtUA	10	100	Core
egtUBC	10	100	Core
ehuA	0	0	Accessory
elaA	0	0	Accessory
elaC	0	0	Accessory
elsH	0	0	Accessory
elyC	0	0	Accessory
endA	10	100	Core
engA	0	0	Accessory
eno	0	0	Accessory
entS	0	0	Accessory
epsA	0	0	Accessory
epsB	0	0	Accessory
epsE	0	0	Accessory
epsF	0	0	Accessory
epsG	0	0	Accessory
epsH	1	10	Accessory
epsJ	0	0	Accessory
epsJ~~~wcaA	0	0	Accessory
epsL	0	0	Accessory
epsN	0	0	Accessory
epsV	0	0	Accessory
epuA	0	0	Accessory
era	0	0	Accessory
eriC	0	0	Accessory
ermB	0	0	Accessory
ermL~~~ermC	0	0	Accessory
esaA	0	0	Accessory
esaC	0	0	Accessory
escB	0	0	Accessory
essA	0	0	Accessory
essB	0	0	Accessory
essC	0	0	Accessory
essC~~~ftsK	0	0	Accessory
esxA	0	0	Accessory
eutA	0	0	Accessory
eutC	0	0	Accessory
eutD	0	0	Accessory
eutH	0	0	Accessory
eutJ	0	0	Accessory
eutL	0	0	Accessory
eutM	0	0	Accessory
eutN	0	0	Accessory
eutP	0	0	Accessory
eutQ	0	0	Accessory
exoY~~~wcaJ	0	0	Accessory
exp7~~~mgtA	0	0	Accessory
exp8	0	0	Accessory
ezrA	0	0	Accessory
fAU1	0	0	Accessory
fIDO	0	0	Accessory
fMR2	10	100	Core
fabD	1	10	Accessory
fabF	10	100	Core
fabG	0	0	Accessory
fabH	0	0	Accessory
fabK	10	100	Core
fabM	0	0	Accessory
fabZ	10	100	Core
fabZ~~~fatA	0	0	Accessory
fabZ~~~paaI	0	0	Accessory
fabZ~~~spxR	0	0	Accessory
fadH2	0	0	Accessory
fadM	0	0	Accessory
fasA	7	70	Accessory
fatA	0	0	Accessory
fba	10	100	Core
fbp	0	0	Accessory
fbpA	0	0	Accessory
fbpB	0	0	Accessory
fctA	0	0	Accessory
femA	0	0	Accessory
femA~~~murN	0	0	Accessory
femB~~~fmhB	4	40	Accessory
feoA	0	0	Accessory
feoB	0	0	Accessory
fer	0	0	Accessory
ffh	0	0	Accessory
fghA	0	0	Accessory
fhs	0	0	Accessory
fhs1	0	0	Accessory
fhs~~~fhs2	10	100	Core
fibA	0	0	Accessory
fieF	10	100	Core
fieF~~~mntE	0	0	Accessory
fimA	0	0	Accessory
fimB	0	0	Accessory
fimC	0	0	Accessory
flaA1	0	0	Accessory
fldA	0	0	Accessory
flgJ	10	100	Core
flgM	0	0	Accessory
fliA	0	0	Accessory
fliJ	0	0	Accessory
fliK	0	0	Accessory
fliS	0	0	Accessory
fmhB	6	60	Accessory
fmnP	0	0	Accessory
fmt	0	0	Accessory
fmtA	0	0	Accessory
fni	0	0	Accessory
focA	0	0	Accessory
folA	0	0	Accessory
folB	0	0	Accessory
folC	0	0	Accessory
folD	0	0	Accessory
folE	0	0	Accessory
folK	0	0	Accessory
folK~~~folB	0	0	Accessory
folP	0	0	Accessory
folT	0	0	Accessory
frmA	0	0	Accessory
frmB	0	0	Accessory
frr	0	0	Accessory
fruA	0	0	Accessory
fruA~~~luxR	0	0	Accessory
frvX	0	0	Accessory
fsa	0	0	Accessory
fszA	0	0	Accessory
ftcD	0	0	Accessory
ftf	0	0	Accessory
ftsA	0	0	Accessory
ftsB	10	100	Core
ftsE	10	100	Core
ftsH	0	0	Accessory
ftsJ	0	0	Accessory
ftsK	0	0	Accessory
ftsL	0	0	Accessory
ftsQ	0	0	Accessory
ftsW	0	0	Accessory
ftsX	0	0	Accessory
ftsY	0	0	Accessory
ftsZ	0	0	Accessory
ftsZ~~~murF	0	0	Accessory
fucI	0	0	Accessory
fucO	0	0	Accessory
fucO~~~gldA	0	0	Accessory
funZ	0	0	Accessory
fur	0	0	Accessory
fusA	0	0	Accessory
galA	0	0	Accessory
galE	0	0	Accessory
galK	10	100	Core
galM	0	0	Accessory
galR	0	0	Accessory
galT	0	0	Accessory
galT2~~~galT	0	0	Accessory
galU	10	100	Core
ganA	0	0	Accessory
gap	0	0	Accessory
gapN	0	0	Accessory
gatA	10	100	Core
gatB	10	100	Core
gatC	10	100	Core
gbpC	0	0	Accessory
gdhA	0	0	Accessory
gdmH	0	0	Accessory
gdpP	0	0	Accessory
gldA	0	0	Accessory
glf	0	0	Accessory
glgA	0	0	Accessory
glgB	0	0	Accessory
glgC	0	0	Accessory
glgD	0	0	Accessory
glgP	0	0	Accessory
glmM	10	100	Core
glmS	5	50	Accessory
glmU	0	0	Accessory
glnA	0	0	Accessory
glnH	0	0	Accessory
glnK	10	100	Core
glnQ	0	0	Accessory
glnQ~~~artM	0	0	Accessory
glnQ~~~yxeN	0	0	Accessory
glnR	0	0	Accessory
glnR~~~merR	0	0	Accessory
gloA	0	0	Accessory
gloB	0	0	Accessory
gloB~~~yqgX	10	100	Core
glpE	0	0	Accessory
glpE~~~moeZ~~~pspE	0	0	Accessory
glpF	0	0	Accessory
glpG	0	0	Accessory
glpK	0	0	Accessory
glpO	0	0	Accessory
glpR	0	0	Accessory
gltA	10	100	Core
gltB	0	0	Accessory
gltC	4	40	Accessory
gltD	0	0	Accessory
gltX	0	0	Accessory
gluP	0	0	Accessory
glvR	0	0	Accessory
glxK	0	0	Accessory
gly	0	0	Accessory
glyA	0	0	Accessory
glyE	0	0	Accessory
glyG	0	0	Accessory
glyP~~~alsT	0	0	Accessory
glyQ	10	100	Core
glyS	0	0	Accessory
gmk	0	0	Accessory
gmuD	0	0	Accessory
gndA	0	0	Accessory
gntR	0	0	Accessory
gntR~~~aRO8	0	0	Accessory
gntR~~~ubiC	0	0	Accessory
gntR~~~ytrA~~~yhcF	0	0	Accessory
gntR~~~yvoA~~~mngR	0	0	Accessory
gntX	0	0	Accessory
gor	0	0	Accessory
gorA	0	0	Accessory
gph	0	0	Accessory
gpmA	10	100	Core
gpmB2	0	0	Accessory
gpsA	10	100	Core
gpsB	0	0	Accessory
greA	0	0	Accessory
groES	0	0	Accessory
groL	0	0	Accessory
group_0	0	0	Accessory
group_1	0	0	Accessory
group_10	1	10	Accessory
group_100	0	0	Accessory
group_1000	0	0	Accessory
group_10000	0	0	Accessory
group_10001	0	0	Accessory
group_10002	0	0	Accessory
group_10003	0	0	Accessory
group_10004	0	0	Accessory
group_10005	0	0	Accessory
group_10006	0	0	Accessory
group_10007	0	0	Accessory
group_10008	0	0	Accessory
group_10009	0	0	Accessory
group_1001	0	0	Accessory
group_10010	0	0	Accessory
group_10011	0	0	Accessory
group_10012	0	0	Accessory
group_10013	0	0	Accessory
group_10014	0	0	Accessory
group_10015	0	0	Accessory
group_10016	0	0	Accessory
group_10017	0	0	Accessory
group_10018	0	0	Accessory
group_10019	0	0	Accessory
group_1002	0	0	Accessory
group_10020	0	0	Accessory
group_10021	0	0	Accessory
group_10022	0	0	Accessory
group_10023	0	0	Accessory
group_10024	0	0	Accessory
group_10025	0	0	Accessory
group_10026	0	0	Accessory
group_10027	3	30	Accessory
group_10028	3	30	Accessory
group_10029	0	0	Accessory
group_1003	0	0	Accessory
group_10030	0	0	Accessory
group_10031	0	0	Accessory
group_10032	0	0	Accessory
group_10033	0	0	Accessory
group_10034	0	0	Accessory
group_10035	0	0	Accessory
group_10036	0	0	Accessory
group_10037	0	0	Accessory
group_10038	0	0	Accessory
group_10039	0	0	Accessory
group_1004	0	0	Accessory
group_10040	0	0	Accessory
group_10041	0	0	Accessory
group_10042	0	0	Accessory
group_10043	0	0	Accessory
group_10044	0	0	Accessory
group_10045	0	0	Accessory
group_10046	0	0	Accessory
group_10047	0	0	Accessory
group_10048	0	0	Accessory
group_10049	0	0	Accessory
group_1005	0	0	Accessory
group_10050	0	0	Accessory
group_10051	0	0	Accessory
group_10052	0	0	Accessory
group_10053	0	0	Accessory
group_10054	0	0	Accessory
group_10055	0	0	Accessory
group_10056	0	0	Accessory
group_10057	0	0	Accessory
group_10058	0	0	Accessory
group_10059	0	0	Accessory
group_1006	0	0	Accessory
group_10060	0	0	Accessory
group_10061	0	0	Accessory
group_10062	0	0	Accessory
group_10063	3	30	Accessory
group_10064	3	30	Accessory
group_10065	0	0	Accessory
group_10066	0	0	Accessory
group_10067	0	0	Accessory
group_10068	0	0	Accessory
group_10069	0	0	Accessory
group_1007	0	0	Accessory
group_10070	0	0	Accessory
group_10071	0	0	Accessory
group_10072	0	0	Accessory
group_10073	0	0	Accessory
group_10074	0	0	Accessory
group_10075	0	0	Accessory
group_10076	10	100	Core
group_10077	1	10	Accessory
group_10078	0	0	Accessory
group_10079	0	0	Accessory
group_1008	0	0	Accessory
group_10080	0	0	Accessory
group_10081	0	0	Accessory
group_10082	0	0	Accessory
group_10083	0	0	Accessory
group_10084	0	0	Accessory
group_10085	0	0	Accessory
group_10086	0	0	Accessory
group_10087	0	0	Accessory
group_10088	0	0	Accessory
group_10089	0	0	Accessory
group_1009	0	0	Accessory
group_10090	0	0	Accessory
group_10091	0	0	Accessory
group_10092	0	0	Accessory
group_10093	0	0	Accessory
group_10094	0	0	Accessory
group_10095	0	0	Accessory
group_10096	0	0	Accessory
group_10097	0	0	Accessory
group_10098	0	0	Accessory
group_10099	3	30	Accessory
group_101	0	0	Accessory
group_1010	0	0	Accessory
group_10100	0	0	Accessory
group_10101	0	0	Accessory
group_10102	0	0	Accessory
group_10103	0	0	Accessory
group_10104	0	0	Accessory
group_10105	0	0	Accessory
group_10106	0	0	Accessory
group_10107	10	100	Core
group_10108	0	0	Accessory
group_10109	0	0	Accessory
group_1011	0	0	Accessory
group_10110	1	10	Accessory
group_10111	0	0	Accessory
group_10112	0	0	Accessory
group_10113	0	0	Accessory
group_10114	0	0	Accessory
group_10115	0	0	Accessory
group_10116	0	0	Accessory
group_10117	0	0	Accessory
group_10118	0	0	Accessory
group_10119	0	0	Accessory
group_1012	0	0	Accessory
group_10120	0	0	Accessory
group_10121	0	0	Accessory
group_10122	0	0	Accessory
group_10123	0	0	Accessory
group_10124	0	0	Accessory
group_10125	0	0	Accessory
group_10126	0	0	Accessory
group_10127	0	0	Accessory
group_10128	3	30	Accessory
group_10129	1	10	Accessory
group_1013	0	0	Accessory
group_10130	0	0	Accessory
group_10131	0	0	Accessory
group_10132	0	0	Accessory
group_10133	0	0	Accessory
group_10134	0	0	Accessory
group_10135	0	0	Accessory
group_10136	0	0	Accessory
group_10137	0	0	Accessory
group_10138	0	0	Accessory
group_10139	0	0	Accessory
group_1014	0	0	Accessory
group_10140	0	0	Accessory
group_10141	0	0	Accessory
group_10142	0	0	Accessory
group_10143	0	0	Accessory
group_10144	0	0	Accessory
group_10145	0	0	Accessory
group_10146	0	0	Accessory
group_10147	0	0	Accessory
group_10148	0	0	Accessory
group_10149	0	0	Accessory
group_1015	1	10	Accessory
group_10150	0	0	Accessory
group_10151	0	0	Accessory
group_10152	0	0	Accessory
group_10153	0	0	Accessory
group_10154	0	0	Accessory
group_10155	0	0	Accessory
group_10156	0	0	Accessory
group_10157	0	0	Accessory
group_10158	0	0	Accessory
group_10159	0	0	Accessory
group_1016	1	10	Accessory
group_10160	0	0	Accessory
group_10161	0	0	Accessory
group_10162	0	0	Accessory
group_10163	0	0	Accessory
group_10164	3	30	Accessory
group_10165	0	0	Accessory
group_10166	0	0	Accessory
group_10167	0	0	Accessory
group_10168	0	0	Accessory
group_10169	0	0	Accessory
group_1017	0	0	Accessory
group_10170	0	0	Accessory
group_10171	0	0	Accessory
group_10172	0	0	Accessory
group_10173	1	10	Accessory
group_10174	0	0	Accessory
group_10175	0	0	Accessory
group_10176	0	0	Accessory
group_10177	1	10	Accessory
group_10178	0	0	Accessory
group_10179	0	0	Accessory
group_1018	0	0	Accessory
group_10180	0	0	Accessory
group_10181	0	0	Accessory
group_10182	0	0	Accessory
group_10183	0	0	Accessory
group_10184	0	0	Accessory
group_10185	0	0	Accessory
group_10186	0	0	Accessory
group_10187	0	0	Accessory
group_10188	0	0	Accessory
group_10189	0	0	Accessory
group_1019	0	0	Accessory
group_10190	0	0	Accessory
group_10191	0	0	Accessory
group_10192	3	30	Accessory
group_10193	0	0	Accessory
group_10194	0	0	Accessory
group_10195	0	0	Accessory
group_10196	0	0	Accessory
group_10197	0	0	Accessory
group_10198	0	0	Accessory
group_10199	0	0	Accessory
group_102	7	70	Accessory
group_1020	0	0	Accessory
group_10200	0	0	Accessory
group_10201	0	0	Accessory
group_10202	0	0	Accessory
group_10203	0	0	Accessory
group_10204	0	0	Accessory
group_10205	0	0	Accessory
group_10206	4	40	Accessory
group_10207	2	20	Accessory
group_10208	5	50	Accessory
group_10209	0	0	Accessory
group_1021	0	0	Accessory
group_10210	1	10	Accessory
group_10211	1	10	Accessory
group_10212	0	0	Accessory
group_10213	1	10	Accessory
group_10214	1	10	Accessory
group_10215	0	0	Accessory
group_10216	0	0	Accessory
group_10217	0	0	Accessory
group_10218	0	0	Accessory
group_10219	0	0	Accessory
group_1022	0	0	Accessory
group_10220	0	0	Accessory
group_10221	0	0	Accessory
group_10222	0	0	Accessory
group_10223	0	0	Accessory
group_10224	0	0	Accessory
group_10225	0	0	Accessory
group_10226	0	0	Accessory
group_10227	0	0	Accessory
group_10228	0	0	Accessory
group_10229	0	0	Accessory
group_1023	0	0	Accessory
group_10230	0	0	Accessory
group_10231	0	0	Accessory
group_10232	0	0	Accessory
group_10233	0	0	Accessory
group_10234	0	0	Accessory
group_10235	0	0	Accessory
group_10236	0	0	Accessory
group_10237	0	0	Accessory
group_10238	0	0	Accessory
group_10239	0	0	Accessory
group_1024	0	0	Accessory
group_10240	0	0	Accessory
group_10241	0	0	Accessory
group_10242	0	0	Accessory
group_10243	0	0	Accessory
group_10244	0	0	Accessory
group_10245	0	0	Accessory
group_10246	0	0	Accessory
group_10247	10	100	Core
group_10248	0	0	Accessory
group_10249	0	0	Accessory
group_1025	0	0	Accessory
group_10250	0	0	Accessory
group_10251	0	0	Accessory
group_10252	0	0	Accessory
group_10253	0	0	Accessory
group_10254	0	0	Accessory
group_10255	0	0	Accessory
group_10256	0	0	Accessory
group_10257	0	0	Accessory
group_10258	0	0	Accessory
group_10259	0	0	Accessory
group_1026	0	0	Accessory
group_10260	0	0	Accessory
group_10261	0	0	Accessory
group_10262	0	0	Accessory
group_10263	0	0	Accessory
group_10264	0	0	Accessory
group_10265	0	0	Accessory
group_10266	0	0	Accessory
group_10267	0	0	Accessory
group_10268	0	0	Accessory
group_10269	0	0	Accessory
group_1027	0	0	Accessory
group_10270	0	0	Accessory
group_10271	1	10	Accessory
group_10272	0	0	Accessory
group_10273	0	0	Accessory
group_10274	0	0	Accessory
group_10275	0	0	Accessory
group_10276	0	0	Accessory
group_10277	0	0	Accessory
group_10278	0	0	Accessory
group_10279	0	0	Accessory
group_1028	0	0	Accessory
group_10280	0	0	Accessory
group_10281	0	0	Accessory
group_10282	0	0	Accessory
group_10283	0	0	Accessory
group_10284	0	0	Accessory
group_10285	0	0	Accessory
group_10286	0	0	Accessory
group_10287	0	0	Accessory
group_10288	0	0	Accessory
group_10289	0	0	Accessory
group_1029	0	0	Accessory
group_10290	0	0	Accessory
group_10291	0	0	Accessory
group_10292	0	0	Accessory
group_10293	0	0	Accessory
group_10294	0	0	Accessory
group_10295	0	0	Accessory
group_10296	0	0	Accessory
group_10297	0	0	Accessory
group_10298	0	0	Accessory
group_10299	0	0	Accessory
group_103	0	0	Accessory
group_1030	0	0	Accessory
group_10300	0	0	Accessory
group_10301	0	0	Accessory
group_10302	0	0	Accessory
group_10303	0	0	Accessory
group_10304	0	0	Accessory
group_10305	0	0	Accessory
group_10306	0	0	Accessory
group_10307	0	0	Accessory
group_10308	0	0	Accessory
group_10309	0	0	Accessory
group_1031	0	0	Accessory
group_10310	0	0	Accessory
group_10311	0	0	Accessory
group_10312	0	0	Accessory
group_10313	0	0	Accessory
group_10314	0	0	Accessory
group_10315	0	0	Accessory
group_10316	0	0	Accessory
group_10317	1	10	Accessory
group_10318	1	10	Accessory
group_10319	1	10	Accessory
group_1032	0	0	Accessory
group_10320	0	0	Accessory
group_10321	0	0	Accessory
group_10322	0	0	Accessory
group_10323	0	0	Accessory
group_10324	1	10	Accessory
group_10325	1	10	Accessory
group_10326	0	0	Accessory
group_10327	0	0	Accessory
group_10328	0	0	Accessory
group_10329	0	0	Accessory
group_1033	10	100	Core
group_10330	0	0	Accessory
group_10331	0	0	Accessory
group_10332	0	0	Accessory
group_10333	0	0	Accessory
group_10334	0	0	Accessory
group_10335	0	0	Accessory
group_10336	0	0	Accessory
group_10337	0	0	Accessory
group_10338	3	30	Accessory
group_10339	0	0	Accessory
group_1034	0	0	Accessory
group_10340	0	0	Accessory
group_10341	0	0	Accessory
group_10342	0	0	Accessory
group_10343	0	0	Accessory
group_10344	0	0	Accessory
group_10345	0	0	Accessory
group_10346	4	40	Accessory
group_10347	0	0	Accessory
group_10348	0	0	Accessory
group_10349	0	0	Accessory
group_1035	0	0	Accessory
group_10350	0	0	Accessory
group_10351	0	0	Accessory
group_10352	0	0	Accessory
group_10353	0	0	Accessory
group_10354	0	0	Accessory
group_10355	0	0	Accessory
group_10356	0	0	Accessory
group_10357	0	0	Accessory
group_10358	0	0	Accessory
group_10359	0	0	Accessory
group_1036	0	0	Accessory
group_10360	0	0	Accessory
group_10361	0	0	Accessory
group_10362	0	0	Accessory
group_10363	0	0	Accessory
group_10364	0	0	Accessory
group_10365	1	10	Accessory
group_10366	0	0	Accessory
group_10367	0	0	Accessory
group_10368	0	0	Accessory
group_10369	0	0	Accessory
group_1037	0	0	Accessory
group_10370	0	0	Accessory
group_10371	0	0	Accessory
group_10372	0	0	Accessory
group_10373	0	0	Accessory
group_10374	0	0	Accessory
group_10375	0	0	Accessory
group_10376	0	0	Accessory
group_10377	0	0	Accessory
group_10378	0	0	Accessory
group_10379	0	0	Accessory
group_1038	0	0	Accessory
group_10380	0	0	Accessory
group_10381	1	10	Accessory
group_10382	0	0	Accessory
group_10383	0	0	Accessory
group_10384	0	0	Accessory
group_10385	0	0	Accessory
group_10386	0	0	Accessory
group_10387	0	0	Accessory
group_10388	0	0	Accessory
group_10389	0	0	Accessory
group_1039	0	0	Accessory
group_10390	0	0	Accessory
group_10391	0	0	Accessory
group_10392	0	0	Accessory
group_10393	1	10	Accessory
group_10394	0	0	Accessory
group_10395	0	0	Accessory
group_10396	0	0	Accessory
group_10397	0	0	Accessory
group_10398	0	0	Accessory
group_10399	0	0	Accessory
group_104	0	0	Accessory
group_1040	1	10	Accessory
group_10400	0	0	Accessory
group_10401	0	0	Accessory
group_10402	0	0	Accessory
group_10403	3	30	Accessory
group_10404	1	10	Accessory
group_10405	1	10	Accessory
group_10406	0	0	Accessory
group_10407	0	0	Accessory
group_10408	0	0	Accessory
group_10409	0	0	Accessory
group_1041	0	0	Accessory
group_10410	0	0	Accessory
group_10411	0	0	Accessory
group_10412	0	0	Accessory
group_10413	0	0	Accessory
group_10414	0	0	Accessory
group_10415	0	0	Accessory
group_10416	0	0	Accessory
group_10417	2	20	Accessory
group_10418	10	100	Core
group_10419	0	0	Accessory
group_1042	0	0	Accessory
group_10420	0	0	Accessory
group_10421	0	0	Accessory
group_10422	0	0	Accessory
group_10423	0	0	Accessory
group_10424	0	0	Accessory
group_10425	0	0	Accessory
group_10426	0	0	Accessory
group_10427	0	0	Accessory
group_10428	0	0	Accessory
group_10429	0	0	Accessory
group_1043	0	0	Accessory
group_10430	0	0	Accessory
group_10431	0	0	Accessory
group_10432	0	0	Accessory
group_10433	0	0	Accessory
group_10434	3	30	Accessory
group_10435	0	0	Accessory
group_10436	0	0	Accessory
group_10437	0	0	Accessory
group_10438	0	0	Accessory
group_10439	0	0	Accessory
group_1044	0	0	Accessory
group_10440	0	0	Accessory
group_10441	0	0	Accessory
group_10442	0	0	Accessory
group_10443	0	0	Accessory
group_10444	0	0	Accessory
group_10445	0	0	Accessory
group_10446	0	0	Accessory
group_10447	0	0	Accessory
group_10448	0	0	Accessory
group_10449	0	0	Accessory
group_1045	0	0	Accessory
group_10450	0	0	Accessory
group_10451	0	0	Accessory
group_10452	0	0	Accessory
group_10453	0	0	Accessory
group_10454	0	0	Accessory
group_10455	0	0	Accessory
group_10456	0	0	Accessory
group_10457	0	0	Accessory
group_10458	0	0	Accessory
group_10459	1	10	Accessory
group_1046	0	0	Accessory
group_10460	1	10	Accessory
group_10461	0	0	Accessory
group_10462	1	10	Accessory
group_10463	0	0	Accessory
group_10464	0	0	Accessory
group_10465	0	0	Accessory
group_10466	0	0	Accessory
group_10467	0	0	Accessory
group_10468	0	0	Accessory
group_10469	1	10	Accessory
group_1047	0	0	Accessory
group_10470	0	0	Accessory
group_10471	0	0	Accessory
group_10472	0	0	Accessory
group_10473	0	0	Accessory
group_10474	0	0	Accessory
group_10475	0	0	Accessory
group_10476	1	10	Accessory
group_10477	1	10	Accessory
group_10478	0	0	Accessory
group_10479	0	0	Accessory
group_1048	10	100	Core
group_10480	0	0	Accessory
group_10481	0	0	Accessory
group_10482	0	0	Accessory
group_10483	0	0	Accessory
group_10484	0	0	Accessory
group_10485	0	0	Accessory
group_10486	0	0	Accessory
group_10487	0	0	Accessory
group_10488	0	0	Accessory
group_10489	0	0	Accessory
group_1049	1	10	Accessory
group_10490	0	0	Accessory
group_10491	0	0	Accessory
group_10492	0	0	Accessory
group_10493	0	0	Accessory
group_10494	0	0	Accessory
group_10495	0	0	Accessory
group_10496	0	0	Accessory
group_10497	0	0	Accessory
group_10498	0	0	Accessory
group_10499	0	0	Accessory
group_105	0	0	Accessory
group_1050	0	0	Accessory
group_10500	0	0	Accessory
group_10501	0	0	Accessory
group_10502	0	0	Accessory
group_10503	0	0	Accessory
group_10504	0	0	Accessory
group_10505	0	0	Accessory
group_10506	0	0	Accessory
group_10507	0	0	Accessory
group_10508	0	0	Accessory
group_10509	0	0	Accessory
group_1051	0	0	Accessory
group_10510	0	0	Accessory
group_10511	0	0	Accessory
group_10512	0	0	Accessory
group_10513	0	0	Accessory
group_10514	0	0	Accessory
group_10515	0	0	Accessory
group_10516	0	0	Accessory
group_10517	0	0	Accessory
group_10518	0	0	Accessory
group_10519	0	0	Accessory
group_1052	0	0	Accessory
group_10520	0	0	Accessory
group_10521	0	0	Accessory
group_10522	0	0	Accessory
group_10523	0	0	Accessory
group_10524	0	0	Accessory
group_10525	0	0	Accessory
group_10526	0	0	Accessory
group_10527	0	0	Accessory
group_10528	0	0	Accessory
group_10529	0	0	Accessory
group_1053	0	0	Accessory
group_10530	1	10	Accessory
group_10531	0	0	Accessory
group_10532	0	0	Accessory
group_10533	0	0	Accessory
group_10534	0	0	Accessory
group_10535	0	0	Accessory
group_10536	0	0	Accessory
group_10537	0	0	Accessory
group_10538	0	0	Accessory
group_10539	0	0	Accessory
group_1054	0	0	Accessory
group_10540	10	100	Core
group_10541	0	0	Accessory
group_10542	0	0	Accessory
group_10543	0	0	Accessory
group_10544	0	0	Accessory
group_10545	0	0	Accessory
group_10546	0	0	Accessory
group_10547	0	0	Accessory
group_10548	0	0	Accessory
group_10549	0	0	Accessory
group_1055	1	10	Accessory
group_10550	0	0	Accessory
group_10551	0	0	Accessory
group_10552	0	0	Accessory
group_10553	0	0	Accessory
group_10554	0	0	Accessory
group_10555	0	0	Accessory
group_10556	0	0	Accessory
group_10557	0	0	Accessory
group_10558	0	0	Accessory
group_10559	0	0	Accessory
group_1056	0	0	Accessory
group_10560	0	0	Accessory
group_10561	0	0	Accessory
group_10562	0	0	Accessory
group_10563	0	0	Accessory
group_10564	0	0	Accessory
group_10565	0	0	Accessory
group_10566	0	0	Accessory
group_10567	0	0	Accessory
group_10568	0	0	Accessory
group_10569	0	0	Accessory
group_1057	0	0	Accessory
group_10570	0	0	Accessory
group_10571	0	0	Accessory
group_10572	0	0	Accessory
group_10573	0	0	Accessory
group_10574	0	0	Accessory
group_10575	0	0	Accessory
group_10576	0	0	Accessory
group_10577	0	0	Accessory
group_10578	1	10	Accessory
group_10579	0	0	Accessory
group_1058	1	10	Accessory
group_10580	0	0	Accessory
group_10581	0	0	Accessory
group_10582	0	0	Accessory
group_10583	0	0	Accessory
group_10584	1	10	Accessory
group_10585	1	10	Accessory
group_10586	0	0	Accessory
group_10587	0	0	Accessory
group_10588	0	0	Accessory
group_10589	0	0	Accessory
group_1059	0	0	Accessory
group_10590	0	0	Accessory
group_10591	0	0	Accessory
group_10592	0	0	Accessory
group_10593	0	0	Accessory
group_10594	0	0	Accessory
group_10595	0	0	Accessory
group_10596	0	0	Accessory
group_10597	0	0	Accessory
group_10598	0	0	Accessory
group_10599	0	0	Accessory
group_106	0	0	Accessory
group_1060	0	0	Accessory
group_10600	0	0	Accessory
group_10601	0	0	Accessory
group_10602	0	0	Accessory
group_10603	0	0	Accessory
group_10604	0	0	Accessory
group_10605	0	0	Accessory
group_10606	0	0	Accessory
group_10607	0	0	Accessory
group_10608	0	0	Accessory
group_10609	0	0	Accessory
group_1061	0	0	Accessory
group_10610	0	0	Accessory
group_10611	0	0	Accessory
group_10612	0	0	Accessory
group_10613	0	0	Accessory
group_10614	0	0	Accessory
group_10615	0	0	Accessory
group_10616	0	0	Accessory
group_10617	1	10	Accessory
group_10618	0	0	Accessory
group_10619	0	0	Accessory
group_1062	0	0	Accessory
group_10620	0	0	Accessory
group_10621	0	0	Accessory
group_10622	0	0	Accessory
group_10623	0	0	Accessory
group_10624	0	0	Accessory
group_10625	0	0	Accessory
group_10626	0	0	Accessory
group_10627	0	0	Accessory
group_10628	0	0	Accessory
group_10629	0	0	Accessory
group_1063	0	0	Accessory
group_10630	0	0	Accessory
group_10631	0	0	Accessory
group_10632	0	0	Accessory
group_10633	0	0	Accessory
group_10634	0	0	Accessory
group_10635	0	0	Accessory
group_10636	0	0	Accessory
group_10637	0	0	Accessory
group_10638	0	0	Accessory
group_10639	10	100	Core
group_1064	0	0	Accessory
group_10640	10	100	Core
group_10641	0	0	Accessory
group_10642	0	0	Accessory
group_10643	1	10	Accessory
group_10644	1	10	Accessory
group_10645	1	10	Accessory
group_10646	1	10	Accessory
group_10647	1	10	Accessory
group_10648	0	0	Accessory
group_10649	0	0	Accessory
group_1065	0	0	Accessory
group_10650	0	0	Accessory
group_10651	0	0	Accessory
group_10652	0	0	Accessory
group_10653	1	10	Accessory
group_10654	0	0	Accessory
group_10655	0	0	Accessory
group_10656	0	0	Accessory
group_10657	0	0	Accessory
group_10658	0	0	Accessory
group_10659	0	0	Accessory
group_1066	0	0	Accessory
group_10660	1	10	Accessory
group_10661	0	0	Accessory
group_10662	0	0	Accessory
group_10663	0	0	Accessory
group_10664	0	0	Accessory
group_10665	0	0	Accessory
group_10666	0	0	Accessory
group_10667	0	0	Accessory
group_10668	0	0	Accessory
group_10669	0	0	Accessory
group_1067	0	0	Accessory
group_10670	0	0	Accessory
group_10671	0	0	Accessory
group_10672	0	0	Accessory
group_10673	3	30	Accessory
group_10674	3	30	Accessory
group_10675	3	30	Accessory
group_10676	1	10	Accessory
group_10677	0	0	Accessory
group_10678	0	0	Accessory
group_10679	0	0	Accessory
group_1068	0	0	Accessory
group_10680	0	0	Accessory
group_10681	0	0	Accessory
group_10682	0	0	Accessory
group_10683	0	0	Accessory
group_10684	0	0	Accessory
group_10685	0	0	Accessory
group_10686	0	0	Accessory
group_10687	0	0	Accessory
group_10688	0	0	Accessory
group_10689	0	0	Accessory
group_1069	2	20	Accessory
group_10690	0	0	Accessory
group_10691	0	0	Accessory
group_10692	0	0	Accessory
group_10693	0	0	Accessory
group_10694	0	0	Accessory
group_10695	0	0	Accessory
group_10696	0	0	Accessory
group_10697	3	30	Accessory
group_10698	0	0	Accessory
group_10699	0	0	Accessory
group_107	0	0	Accessory
group_1070	1	10	Accessory
group_10700	0	0	Accessory
group_10701	0	0	Accessory
group_10702	0	0	Accessory
group_10703	0	0	Accessory
group_10704	0	0	Accessory
group_10705	0	0	Accessory
group_10706	1	10	Accessory
group_10707	1	10	Accessory
group_10708	0	0	Accessory
group_10709	0	0	Accessory
group_1071	0	0	Accessory
group_10710	0	0	Accessory
group_10711	0	0	Accessory
group_10712	0	0	Accessory
group_10713	0	0	Accessory
group_10714	0	0	Accessory
group_10715	0	0	Accessory
group_10716	0	0	Accessory
group_10717	0	0	Accessory
group_10718	0	0	Accessory
group_10719	0	0	Accessory
group_1072	1	10	Accessory
group_10720	0	0	Accessory
group_10721	0	0	Accessory
group_10722	0	0	Accessory
group_10723	0	0	Accessory
group_10724	0	0	Accessory
group_10725	0	0	Accessory
group_10726	3	30	Accessory
group_10727	0	0	Accessory
group_10728	0	0	Accessory
group_10729	0	0	Accessory
group_1073	1	10	Accessory
group_10730	0	0	Accessory
group_10731	0	0	Accessory
group_10732	0	0	Accessory
group_10733	0	0	Accessory
group_10734	0	0	Accessory
group_10735	0	0	Accessory
group_10736	0	0	Accessory
group_10737	0	0	Accessory
group_10738	0	0	Accessory
group_10739	0	0	Accessory
group_1074	0	0	Accessory
group_10740	0	0	Accessory
group_10741	0	0	Accessory
group_10742	0	0	Accessory
group_10743	0	0	Accessory
group_10744	0	0	Accessory
group_10745	0	0	Accessory
group_10746	0	0	Accessory
group_10747	1	10	Accessory
group_10748	0	0	Accessory
group_10749	0	0	Accessory
group_1075	0	0	Accessory
group_10750	0	0	Accessory
group_10751	0	0	Accessory
group_10752	0	0	Accessory
group_10753	0	0	Accessory
group_10754	0	0	Accessory
group_10755	3	30	Accessory
group_10756	0	0	Accessory
group_10757	0	0	Accessory
group_10758	0	0	Accessory
group_10759	0	0	Accessory
group_1076	0	0	Accessory
group_10760	0	0	Accessory
group_10761	0	0	Accessory
group_10762	3	30	Accessory
group_10763	0	0	Accessory
group_10764	0	0	Accessory
group_10765	0	0	Accessory
group_10766	0	0	Accessory
group_10767	0	0	Accessory
group_10768	0	0	Accessory
group_10769	0	0	Accessory
group_1077	0	0	Accessory
group_10770	0	0	Accessory
group_10771	0	0	Accessory
group_10772	0	0	Accessory
group_10773	0	0	Accessory
group_10774	0	0	Accessory
group_10775	0	0	Accessory
group_10776	0	0	Accessory
group_10777	0	0	Accessory
group_10778	0	0	Accessory
group_10779	0	0	Accessory
group_1078	0	0	Accessory
group_10780	0	0	Accessory
group_10781	0	0	Accessory
group_10782	0	0	Accessory
group_10783	0	0	Accessory
group_10784	1	10	Accessory
group_10785	0	0	Accessory
group_10786	0	0	Accessory
group_10787	0	0	Accessory
group_10788	0	0	Accessory
group_10789	0	0	Accessory
group_1079	0	0	Accessory
group_10790	0	0	Accessory
group_10791	0	0	Accessory
group_10792	0	0	Accessory
group_10793	0	0	Accessory
group_10794	0	0	Accessory
group_10795	0	0	Accessory
group_10796	0	0	Accessory
group_10797	0	0	Accessory
group_10798	0	0	Accessory
group_10799	0	0	Accessory
group_108	1	10	Accessory
group_1080	0	0	Accessory
group_10800	0	0	Accessory
group_10801	0	0	Accessory
group_10802	1	10	Accessory
group_10803	0	0	Accessory
group_10804	0	0	Accessory
group_10805	0	0	Accessory
group_10806	0	0	Accessory
group_10807	0	0	Accessory
group_10808	0	0	Accessory
group_10809	0	0	Accessory
group_1081	0	0	Accessory
group_10810	0	0	Accessory
group_10811	0	0	Accessory
group_10812	0	0	Accessory
group_10813	0	0	Accessory
group_10814	0	0	Accessory
group_10815	0	0	Accessory
group_10816	0	0	Accessory
group_10817	0	0	Accessory
group_10818	0	0	Accessory
group_10819	0	0	Accessory
group_1082	0	0	Accessory
group_10820	0	0	Accessory
group_10821	0	0	Accessory
group_10822	0	0	Accessory
group_10823	0	0	Accessory
group_10824	1	10	Accessory
group_10825	0	0	Accessory
group_10826	0	0	Accessory
group_10827	0	0	Accessory
group_10828	0	0	Accessory
group_10829	0	0	Accessory
group_1083	0	0	Accessory
group_10830	0	0	Accessory
group_10831	0	0	Accessory
group_10832	0	0	Accessory
group_10833	0	0	Accessory
group_10834	0	0	Accessory
group_10835	0	0	Accessory
group_10836	0	0	Accessory
group_10837	0	0	Accessory
group_10838	0	0	Accessory
group_10839	0	0	Accessory
group_1084	0	0	Accessory
group_10840	0	0	Accessory
group_10841	0	0	Accessory
group_10842	0	0	Accessory
group_10843	0	0	Accessory
group_10844	0	0	Accessory
group_10845	0	0	Accessory
group_10846	0	0	Accessory
group_10847	0	0	Accessory
group_10848	0	0	Accessory
group_10849	0	0	Accessory
group_1085	0	0	Accessory
group_10850	0	0	Accessory
group_10851	0	0	Accessory
group_10852	0	0	Accessory
group_10853	0	0	Accessory
group_10854	0	0	Accessory
group_10855	0	0	Accessory
group_10856	0	0	Accessory
group_10857	0	0	Accessory
group_10858	0	0	Accessory
group_10859	0	0	Accessory
group_1086	0	0	Accessory
group_10860	0	0	Accessory
group_10861	0	0	Accessory
group_10862	0	0	Accessory
group_10863	0	0	Accessory
group_10864	0	0	Accessory
group_10865	0	0	Accessory
group_10866	0	0	Accessory
group_10867	0	0	Accessory
group_10868	0	0	Accessory
group_10869	0	0	Accessory
group_1087	1	10	Accessory
group_10870	0	0	Accessory
group_10871	0	0	Accessory
group_10872	0	0	Accessory
group_10873	0	0	Accessory
group_10874	0	0	Accessory
group_10875	0	0	Accessory
group_10876	0	0	Accessory
group_10877	0	0	Accessory
group_10878	0	0	Accessory
group_10879	0	0	Accessory
group_1088	0	0	Accessory
group_10880	1	10	Accessory
group_10881	0	0	Accessory
group_10882	0	0	Accessory
group_10883	0	0	Accessory
group_10884	0	0	Accessory
group_10885	0	0	Accessory
group_10886	0	0	Accessory
group_10887	0	0	Accessory
group_10888	0	0	Accessory
group_10889	0	0	Accessory
group_1089	0	0	Accessory
group_10890	0	0	Accessory
group_10891	0	0	Accessory
group_10892	0	0	Accessory
group_10893	0	0	Accessory
group_10894	0	0	Accessory
group_10895	0	0	Accessory
group_10896	0	0	Accessory
group_10897	0	0	Accessory
group_10898	0	0	Accessory
group_10899	0	0	Accessory
group_109	0	0	Accessory
group_1090	0	0	Accessory
group_10900	0	0	Accessory
group_10901	0	0	Accessory
group_10902	0	0	Accessory
group_10903	0	0	Accessory
group_10904	0	0	Accessory
group_10905	0	0	Accessory
group_10906	0	0	Accessory
group_10907	0	0	Accessory
group_10908	6	60	Accessory
group_10909	0	0	Accessory
group_1091	1	10	Accessory
group_10910	0	0	Accessory
group_10911	0	0	Accessory
group_10912	0	0	Accessory
group_10913	0	0	Accessory
group_10914	0	0	Accessory
group_10915	0	0	Accessory
group_10916	0	0	Accessory
group_10917	0	0	Accessory
group_10918	0	0	Accessory
group_10919	0	0	Accessory
group_1092	1	10	Accessory
group_10920	0	0	Accessory
group_10921	0	0	Accessory
group_10922	0	0	Accessory
group_10923	0	0	Accessory
group_10924	0	0	Accessory
group_10925	1	10	Accessory
group_10926	0	0	Accessory
group_10927	0	0	Accessory
group_10928	0	0	Accessory
group_10929	0	0	Accessory
group_1093	0	0	Accessory
group_10930	0	0	Accessory
group_10931	0	0	Accessory
group_10932	0	0	Accessory
group_10933	0	0	Accessory
group_10934	0	0	Accessory
group_10935	0	0	Accessory
group_10936	0	0	Accessory
group_10937	0	0	Accessory
group_10938	10	100	Core
group_10939	0	0	Accessory
group_1094	0	0	Accessory
group_10940	1	10	Accessory
group_10941	0	0	Accessory
group_10942	0	0	Accessory
group_10943	0	0	Accessory
group_10944	0	0	Accessory
group_10945	0	0	Accessory
group_10946	0	0	Accessory
group_10947	0	0	Accessory
group_10948	0	0	Accessory
group_10949	0	0	Accessory
group_1095	0	0	Accessory
group_10950	0	0	Accessory
group_10951	0	0	Accessory
group_10952	0	0	Accessory
group_10953	0	0	Accessory
group_10954	0	0	Accessory
group_10955	0	0	Accessory
group_10956	0	0	Accessory
group_10957	0	0	Accessory
group_10958	0	0	Accessory
group_10959	0	0	Accessory
group_1096	0	0	Accessory
group_10960	2	20	Accessory
group_10961	1	10	Accessory
group_10962	0	0	Accessory
group_10963	0	0	Accessory
group_10964	0	0	Accessory
group_10965	0	0	Accessory
group_10966	0	0	Accessory
group_10967	0	0	Accessory
group_10968	0	0	Accessory
group_10969	0	0	Accessory
group_1097	0	0	Accessory
group_10970	0	0	Accessory
group_10971	0	0	Accessory
group_10972	0	0	Accessory
group_10973	0	0	Accessory
group_10974	0	0	Accessory
group_10975	0	0	Accessory
group_10976	0	0	Accessory
group_10977	0	0	Accessory
group_10978	0	0	Accessory
group_10979	1	10	Accessory
group_1098	0	0	Accessory
group_10980	0	0	Accessory
group_10981	0	0	Accessory
group_10982	0	0	Accessory
group_10983	0	0	Accessory
group_10984	0	0	Accessory
group_10985	0	0	Accessory
group_10986	0	0	Accessory
group_10987	0	0	Accessory
group_10988	0	0	Accessory
group_10989	0	0	Accessory
group_1099	0	0	Accessory
group_10990	0	0	Accessory
group_10991	0	0	Accessory
group_10992	0	0	Accessory
group_10993	0	0	Accessory
group_10994	0	0	Accessory
group_10995	0	0	Accessory
group_10996	0	0	Accessory
group_10997	0	0	Accessory
group_10998	0	0	Accessory
group_10999	0	0	Accessory
group_11	0	0	Accessory
group_110	0	0	Accessory
group_1100	0	0	Accessory
group_11000	0	0	Accessory
group_11001	0	0	Accessory
group_11002	0	0	Accessory
group_11003	0	0	Accessory
group_11004	0	0	Accessory
group_11005	2	20	Accessory
group_11006	3	30	Accessory
group_11007	3	30	Accessory
group_11008	0	0	Accessory
group_11009	0	0	Accessory
group_1101	0	0	Accessory
group_11010	0	0	Accessory
group_11011	0	0	Accessory
group_11012	0	0	Accessory
group_11013	0	0	Accessory
group_11014	0	0	Accessory
group_11015	0	0	Accessory
group_11016	0	0	Accessory
group_11017	0	0	Accessory
group_11018	0	0	Accessory
group_11019	0	0	Accessory
group_1102	0	0	Accessory
group_11020	0	0	Accessory
group_11021	0	0	Accessory
group_11022	0	0	Accessory
group_11023	0	0	Accessory
group_11024	6	60	Accessory
group_11025	0	0	Accessory
group_11026	0	0	Accessory
group_11027	0	0	Accessory
group_11028	0	0	Accessory
group_11029	0	0	Accessory
group_1103	0	0	Accessory
group_11030	0	0	Accessory
group_11031	0	0	Accessory
group_11032	0	0	Accessory
group_11033	0	0	Accessory
group_11034	0	0	Accessory
group_11035	1	10	Accessory
group_11036	2	20	Accessory
group_11037	0	0	Accessory
group_11038	0	0	Accessory
group_11039	0	0	Accessory
group_1104	0	0	Accessory
group_11040	0	0	Accessory
group_11041	0	0	Accessory
group_11042	0	0	Accessory
group_11043	0	0	Accessory
group_11044	0	0	Accessory
group_11045	0	0	Accessory
group_11046	0	0	Accessory
group_11047	0	0	Accessory
group_11048	0	0	Accessory
group_11049	0	0	Accessory
group_1105	0	0	Accessory
group_11050	3	30	Accessory
group_11051	0	0	Accessory
group_11052	0	0	Accessory
group_11053	0	0	Accessory
group_11054	0	0	Accessory
group_11055	0	0	Accessory
group_11056	0	0	Accessory
group_11057	0	0	Accessory
group_11058	0	0	Accessory
group_11059	0	0	Accessory
group_1106	0	0	Accessory
group_11060	0	0	Accessory
group_11061	0	0	Accessory
group_11062	0	0	Accessory
group_11063	0	0	Accessory
group_11064	0	0	Accessory
group_11065	0	0	Accessory
group_11066	0	0	Accessory
group_11067	0	0	Accessory
group_11068	0	0	Accessory
group_11069	0	0	Accessory
group_1107	0	0	Accessory
group_11070	0	0	Accessory
group_11071	0	0	Accessory
group_11072	0	0	Accessory
group_11073	0	0	Accessory
group_11074	2	20	Accessory
group_11075	0	0	Accessory
group_11076	0	0	Accessory
group_11077	0	0	Accessory
group_11078	0	0	Accessory
group_11079	0	0	Accessory
group_1108	0	0	Accessory
group_11080	0	0	Accessory
group_11081	0	0	Accessory
group_11082	0	0	Accessory
group_11083	0	0	Accessory
group_11084	0	0	Accessory
group_11085	1	10	Accessory
group_11086	0	0	Accessory
group_11087	0	0	Accessory
group_11088	0	0	Accessory
group_11089	0	0	Accessory
group_1109	2	20	Accessory
group_11090	0	0	Accessory
group_11091	0	0	Accessory
group_11092	0	0	Accessory
group_11093	0	0	Accessory
group_11094	0	0	Accessory
group_11095	3	30	Accessory
group_11096	0	0	Accessory
group_11097	0	0	Accessory
group_11098	0	0	Accessory
group_11099	0	0	Accessory
group_111	0	0	Accessory
group_1110	0	0	Accessory
group_11100	0	0	Accessory
group_11101	0	0	Accessory
group_11102	0	0	Accessory
group_11103	0	0	Accessory
group_11104	0	0	Accessory
group_11105	0	0	Accessory
group_11106	0	0	Accessory
group_11107	0	0	Accessory
group_11108	0	0	Accessory
group_11109	0	0	Accessory
group_1111	0	0	Accessory
group_11110	0	0	Accessory
group_11111	0	0	Accessory
group_11112	0	0	Accessory
group_11113	0	0	Accessory
group_11114	0	0	Accessory
group_11115	0	0	Accessory
group_11116	0	0	Accessory
[truncated: 23,138 more rows]

## Sheet: Cluster 2
Supplementary Table 5: Core and accessory genes identified in Cluster 2
Gene	n_present	core_percentage	gene_type
aCT	15	100	Core
aF0785	8	53.3333	Accessory
aF2118	6	40	Accessory
aIM24	3	20	Accessory
aRA1	0	0	Accessory
aRO8	0	0	Accessory
aac6	4	26.6667	Accessory
aarF	0	0	Accessory
abcX	0	0	Accessory
abcf	15	100	Core
abgB	0	0	Accessory
abiF	0	0	Accessory
abiH	3	20	Accessory
abiV	0	0	Accessory
abpA	4	26.6667	Accessory
abrB	0	0	Accessory
accA	15	100	Core
accB	15	100	Core
accC	0	0	Accessory
accD	15	100	Core
aceF	15	100	Core
ackA	11	73.3333	Accessory
acm	0	0	Accessory
acnA	0	0	Accessory
acoA	0	0	Accessory
acoA~~~pdhA	15	100	Core
acoB	15	100	Core
acpA	0	0	Accessory
acpA~~~acpB	0	0	Accessory
acpB	0	0	Accessory
acpP	0	0	Accessory
acpS	0	0	Accessory
acrA	0	0	Accessory
acrIIA6	0	0	Accessory
acrR	0	0	Accessory
acrR~~~tetR	15	100	Core
acuB	0	0	Accessory
acuB~~~cBS	15	100	Core
acuI~~~yhfP	0	0	Accessory
acyP	0	0	Accessory
adaA	0	0	Accessory
adaB	0	0	Accessory
adcA	0	0	Accessory
adcC	0	0	Accessory
add	0	0	Accessory
addA	0	0	Accessory
adhE	0	0	Accessory
adhP	15	100	Core
adk	15	100	Core
aes	0	0	Accessory
afuA	0	0	Accessory
afuC	0	0	Accessory
aga	0	0	Accessory
agaB	15	100	Core
agaS	15	100	Core
agrC	0	0	Accessory
aguA	3	20	Accessory
aguB	1	6.66667	Accessory
ahpC	0	0	Accessory
ahpF	0	0	Accessory
alaS	0	0	Accessory
albA	0	0	Accessory
albE~~~pqqL	0	0	Accessory
albF	0	0	Accessory
albF~~~pqqL	0	0	Accessory
ald	15	100	Core
aliA	0	0	Accessory
aliA~~~sarA~~~oppA	15	100	Core
alkD	0	0	Accessory
alpA	1	6.66667	Accessory
alr	0	0	Accessory
alr~~~acpS	15	100	Core
alsS	0	0	Accessory
alsT	0	0	Accessory
alwI	0	0	Accessory
amaP	0	0	Accessory
amiA	0	0	Accessory
amiF~~~oppF	15	100	Core
ampC	0	0	Accessory
ampH	0	0	Accessory
ampH~~~ampC	0	0	Accessory
ampS~~~pepS	15	100	Core
amrA	5	33.3333	Accessory
amsE	0	0	Accessory
amt	0	0	Accessory
amtB	0	0	Accessory
amyA	0	0	Accessory
ansA	0	0	Accessory
ansP	12	80	Accessory
ant6	15	100	Core
apbE	0	0	Accessory
apeA	1	6.66667	Accessory
aph3IIIa	1	6.66667	Accessory
aprE	0	0	Accessory
apt	15	100	Core
araC	4	26.6667	Accessory
araC~~~tetD	0	0	Accessory
araD	0	0	Accessory
araJ	0	0	Accessory
araQ	0	0	Accessory
araQ~~~ugpE	13	86.6667	Accessory
arcA	15	100	Core
arcC	15	100	Core
arcR	15	100	Core
arcT	0	0	Accessory
ardA	0	0	Accessory
argA~~~ywnH	0	0	Accessory
argB	0	0	Accessory
argC	0	0	Accessory
argD	0	0	Accessory
argE	15	100	Core
argF	15	100	Core
argG	1	6.66667	Accessory
argH	1	6.66667	Accessory
argJ	0	0	Accessory
argR	0	0	Accessory
argS	15	100	Core
arlR	0	0	Accessory
arlR~~~csrR~~~ompR	15	100	Core
aroA	0	0	Accessory
aroB	0	0	Accessory
aroB~~~aroE	15	100	Core
aroC	15	100	Core
aroD	15	100	Core
aroE	15	100	Core
aroG1	15	100	Core
aroK	0	0	Accessory
arpU	0	0	Accessory
arsC	0	0	Accessory
arsC~~~adaB	0	0	Accessory
arsR	0	0	Accessory
artM	0	0	Accessory
asbA	0	0	Accessory
ascB	0	0	Accessory
asd	15	100	Core
asnA	4	26.6667	Accessory
asnS	15	100	Core
asp1	0	0	Accessory
asp2	0	0	Accessory
asp3	0	0	Accessory
asp4	0	0	Accessory
asp5	0	0	Accessory
aspB	15	100	Core
aspB~~~alaT	15	100	Core
aspS	0	0	Accessory
atoS	0	0	Accessory
atpA	15	100	Core
atpB	15	100	Core
atpC	15	100	Core
atpD	15	100	Core
atpE	0	0	Accessory
atpF	15	100	Core
atpG	15	100	Core
atpH	0	0	Accessory
avrD	0	0	Accessory
axe1	15	100	Core
azlC	0	0	Accessory
azlC~~~ygaZ	15	100	Core
azlD	15	100	Core
azlD2	0	0	Accessory
baeS	0	0	Accessory
bcc	0	0	Accessory
bceA	3	20	Accessory
bceB	0	0	Accessory
bceB~~~yxdM	15	100	Core
bcrC	11	73.3333	Accessory
bcsA	0	0	Accessory
bcsZ	0	0	Accessory
beeE	0	0	Accessory
bepR	6	40	Accessory
bet	0	0	Accessory
betI~~~tetR	0	0	Accessory
bglB	0	0	Accessory
bglB~~~gmuD~~~bglA	15	100	Core
bglG	0	0	Accessory
bglG~~~licT	0	0	Accessory
bglH	0	0	Accessory
bgrS	0	0	Accessory
bhtF	0	0	Accessory
bigG	0	0	Accessory
bioF	0	0	Accessory
bioH	0	0	Accessory
bioY	0	0	Accessory
birA	15	100	Core
blaR1	0	0	Accessory
blpA	0	0	Accessory
blpC	0	0	Accessory
blpI	0	0	Accessory
blpJ	0	0	Accessory
blpL	0	0	Accessory
blpM	0	0	Accessory
blpO	0	0	Accessory
blpP	0	0	Accessory
blpR	0	0	Accessory
blpS~~~lytR~~~lytT	0	0	Accessory
blpT	1	6.66667	Accessory
blpX	0	0	Accessory
blpY	0	0	Accessory
blpZ	0	0	Accessory
bofA	0	0	Accessory
briC	0	0	Accessory
brkB	0	0	Accessory
brkB~~~yihY	15	100	Core
brnQ	15	100	Core
brpA	0	0	Accessory
btuD	0	0	Accessory
btuE	15	100	Core
budA	15	100	Core
cDA1	0	0	Accessory
cadA	0	0	Accessory
cadD	11	73.3333	Accessory
cadX	8	53.3333	Accessory
caiA	0	0	Accessory
caiD~~~fabM	15	100	Core
capA	0	0	Accessory
capD	0	0	Accessory
carA	0	0	Accessory
carB	0	0	Accessory
cas1	2	13.3333	Accessory
cas10	0	0	Accessory
cas1c	1	6.66667	Accessory
cas2	2	13.3333	Accessory
cas3	1	6.66667	Accessory
cas4	1	6.66667	Accessory
cas5c	1	6.66667	Accessory
cas6	0	0	Accessory
cas7c	1	6.66667	Accessory
cas8c	1	6.66667	Accessory
cas9	0	0	Accessory
catE	5	33.3333	Accessory
cbbX	0	0	Accessory
cbiA	0	0	Accessory
cbiB	1	6.66667	Accessory
cbiC	0	0	Accessory
cbiD	0	0	Accessory
cbiE	1	6.66667	Accessory
cbiF	0	0	Accessory
cbiG	1	6.66667	Accessory
cbiM	0	0	Accessory
cbiN	0	0	Accessory
cbiO	0	0	Accessory
cbiQ	1	6.66667	Accessory
cbiT	0	0	Accessory
cbpB	0	0	Accessory
cbpC	0	0	Accessory
cbpD	0	0	Accessory
cbpD2	0	0	Accessory
cbpE	0	0	Accessory
cbpF~~~cbpJ	0	0	Accessory
cbpI	0	0	Accessory
cbrC	7	46.6667	Accessory
cca	15	100	Core
ccc1	15	100	Core
ccdA	0	0	Accessory
ccdA2	0	0	Accessory
ccdA2~~~ccdA	15	100	Core
ccmA	1	6.66667	Accessory
ccmD	0	0	Accessory
ccmE	0	0	Accessory
ccmK	1	6.66667	Accessory
ccoS	0	0	Accessory
ccpA	0	0	Accessory
ccpA~~~lacI	15	100	Core
ccpN	6	40	Accessory
ccrZ	0	0	Accessory
cdaA	15	100	Core
cdaR~~~ybbR	0	0	Accessory
cdd	15	100	Core
cdiI	0	0	Accessory
cdsA	15	100	Core
celA	8	53.3333	Accessory
celA~~~comEA	0	0	Accessory
celB	0	0	Accessory
celB~~~comEC	0	0	Accessory
celC	8	53.3333	Accessory
celC~~~bigG	0	0	Accessory
ceuA	0	0	Accessory
ceuB	0	0	Accessory
ceuC	0	0	Accessory
ceuD	0	0	Accessory
chaP	0	0	Accessory
ciaH~~~baeS	15	100	Core
ciaR	0	0	Accessory
cibA	0	0	Accessory
cibB	0	0	Accessory
cinA	15	100	Core
citA	0	0	Accessory
citB	0	0	Accessory
citB~~~luxR~~~degU	15	100	Core
citC	0	0	Accessory
citD	0	0	Accessory
citE	0	0	Accessory
citF	0	0	Accessory
citG	0	0	Accessory
citM	0	0	Accessory
citS	4	26.6667	Accessory
citS~~~yesM	0	0	Accessory
citX	0	0	Accessory
citZ	0	0	Accessory
clcA	11	73.3333	Accessory
clcB	0	0	Accessory
clpA	0	0	Accessory
clpA~~~clpC	15	100	Core
clpA~~~clpE	15	100	Core
clpB	0	0	Accessory
clpC	0	0	Accessory
clpC1	0	0	Accessory
clpE	0	0	Accessory
clpL	0	0	Accessory
clpL~~~clpA	15	100	Core
clpP	15	100	Core
clpX	15	100	Core
cls	15	100	Core
cmk	15	100	Core
cmr4	0	0	Accessory
coaA	15	100	Core
coaB	0	0	Accessory
coaC	15	100	Core
coaD	15	100	Core
coaE	0	0	Accessory
cobA	1	6.66667	Accessory
cobB	1	6.66667	Accessory
cobD	1	6.66667	Accessory
cobI	1	6.66667	Accessory
cobJ	0	0	Accessory
cobK	1	6.66667	Accessory
cobN	1	6.66667	Accessory
cobQ	0	0	Accessory
cobQ~~~gatD	15	100	Core
cobS	1	6.66667	Accessory
cobT	1	6.66667	Accessory
cobU	1	6.66667	Accessory
codY	15	100	Core
cof	0	0	Accessory
cofD	0	0	Accessory
cof~~~ybjI	15	100	Core
coiA	0	0	Accessory
coiA~~~prsA	0	0	Accessory
comA	4	26.6667	Accessory
comA~~~pncF	0	0	Accessory
comB	0	0	Accessory
comC	0	0	Accessory
comD	0	0	Accessory
comD~~~natK	0	0	Accessory
comD~~~yesM~~~dcuS	0	0	Accessory
comE	0	0	Accessory
comEA	0	0	Accessory
comEB	0	0	Accessory
comEC	0	0	Accessory
comE~~~comEB	15	100	Core
comF	3	20	Accessory
comFA	0	0	Accessory
comFA~~~comF	0	0	Accessory
comFC	0	0	Accessory
comF~~~comFC	0	0	Accessory
comF~~~recG~~~comFA	0	0	Accessory
comGA	0	0	Accessory
comGA~~~comGB	0	0	Accessory
comGB	0	0	Accessory
comGC	0	0	Accessory
comGD	0	0	Accessory
comGE	0	0	Accessory
comGF	0	0	Accessory
comGF~~~comGG	0	0	Accessory
comGG	0	0	Accessory
comM	0	0	Accessory
comP	0	0	Accessory
comR	0	0	Accessory
comR1	0	0	Accessory
comW	0	0	Accessory
comX	0	0	Accessory
comX1	0	0	Accessory
comX1~~~comX	0	0	Accessory
comX2	0	0	Accessory
comX2~~~comX1	0	0	Accessory
copG	0	0	Accessory
copY	0	0	Accessory
copZ	0	0	Accessory
corA	15	100	Core
cotH	0	0	Accessory
cotS	0	0	Accessory
cotS~~~licA	0	0	Accessory
cpdA	0	0	Accessory
cpdB	0	0	Accessory
cpoA	0	0	Accessory
cppA	0	0	Accessory
cps2a	0	0	Accessory
cps4B	0	0	Accessory
cpsC	0	0	Accessory
cpsD	0	0	Accessory
cpsD~~~mrp	0	0	Accessory
cpsE~~~wcaJ~~~epsL	15	100	Core
cpsI	0	0	Accessory
cpsJ	0	0	Accessory
cpsL	0	0	Accessory
cpsO~~~epsJ	3	20	Accessory
crcB	0	0	Accessory
crcB~~~fluC	1	6.66667	Accessory
crp	0	0	Accessory
csbD	3	20	Accessory
cshA	12	80	Accessory
cshA~~~srmB	15	100	Core
cshA~~~srmB~~~yfmL	15	100	Core
cshB	0	0	Accessory
cshB~~~srmB	15	100	Core
csm2	0	0	Accessory
csm3	0	0	Accessory
csm4	0	0	Accessory
csm5	0	0	Accessory
csm6	0	0	Accessory
csn2	2	13.3333	Accessory
csoR	2	13.3333	Accessory
ctpA	0	0	Accessory
ctsR	15	100	Core
cutC	0	0	Accessory
cutD	0	0	Accessory
cvfB	15	100	Core
cvpA	0	0	Accessory
cwlA	0	0	Accessory
cwlO	15	100	Core
cydC	0	0	Accessory
cydD	0	0	Accessory
cylB	4	26.6667	Accessory
cynT	0	0	Accessory
cynX	0	0	Accessory
cysA	11	73.3333	Accessory
cysB	0	0	Accessory
cysE	0	0	Accessory
cysE~~~epsC~~~rimI	15	100	Core
cysK	0	0	Accessory
cysS	15	100	Core
czcD	15	100	Core
dAP2	0	0	Accessory
dLH	0	0	Accessory
dacC	0	0	Accessory
dadA	0	0	Accessory
dam	0	0	Accessory
dapA	15	100	Core
dapB	15	100	Core
dapD	15	100	Core
darT	0	0	Accessory
dcm	1	6.66667	Accessory
ddl	0	0	Accessory
dedA	0	0	Accessory
def	0	0	Accessory
degA	0	0	Accessory
degP	0	0	Accessory
degV	15	100	Core
degV~~~trmH	0	0	Accessory
deoB	15	100	Core
deoC	15	100	Core
deoD	15	100	Core
deoR	0	0	Accessory
deoR~~~glpR	15	100	Core
deoR~~~ulaR~~~glpR	8	53.3333	Accessory
der	0	0	Accessory
dexB	15	100	Core
dgkA	15	100	Core
dhaK	0	0	Accessory
dhaK~~~dhaQ	1	6.66667	Accessory
dhaL	0	0	Accessory
dhaM	0	0	Accessory
dhaQ	0	0	Accessory
dhaS	0	0	Accessory
dhfR	0	0	Accessory
dicA	0	0	Accessory
dinB	15	100	Core
dinD	1	6.66667	Accessory
dinF	0	0	Accessory
dinG	1	6.66667	Accessory
divIB	0	0	Accessory
divIVA	15	100	Core
dltA	0	0	Accessory
dltB	0	0	Accessory
dltC	0	0	Accessory
dltD	0	0	Accessory
dltR	0	0	Accessory
dnaA	0	0	Accessory
dnaB	0	0	Accessory
dnaB~~~dnaD	0	0	Accessory
dnaC	0	0	Accessory
dnaD	15	100	Core
dnaE	0	0	Accessory
dnaG	0	0	Accessory
dnaI	15	100	Core
dnaJ	15	100	Core
dnaK	15	100	Core
dnaN	0	0	Accessory
dnaQ	0	0	Accessory
dnaQ~~~dinG~~~polC	0	0	Accessory
dnaQ~~~polC	0	0	Accessory
dnaX	15	100	Core
doc	0	0	Accessory
dpiB	0	0	Accessory
dpnA	0	0	Accessory
dpnD	0	0	Accessory
dpnI	4	26.6667	Accessory
dpnM	0	0	Accessory
dppB	0	0	Accessory
dppC	0	0	Accessory
dppD	0	0	Accessory
dprA	0	0	Accessory
dps	15	100	Core
draG	0	0	Accessory
drrA	0	0	Accessory
drrB	5	33.3333	Accessory
dsbD	0	0	Accessory
dtd	15	100	Core
dusB	15	100	Core
dut	15	100	Core
eCFS	0	0	Accessory
eMAP	11	73.3333	Accessory
eRG12	0	0	Accessory
eamA	0	0	Accessory
eamA~~~rhaT	0	0	Accessory
eamA~~~yicL	0	0	Accessory
ebgC	12	80	Accessory
ebhA	0	0	Accessory
ebsA	15	100	Core
ebsC	15	100	Core
ecfA1	4	26.6667	Accessory
ecfA2	15	100	Core
ecfT	15	100	Core
ecfT~~~mtsC~~~cbiQ	11	73.3333	Accessory
ecsA~~~ccmA	0	0	Accessory
ecsB	0	0	Accessory
ecsC	0	0	Accessory
eda	0	0	Accessory
efeB	15	100	Core
efeO	15	100	Core
efeU	15	100	Core
efiE	0	0	Accessory
efp	15	100	Core
egtUA	14	93.3333	Accessory
egtUBC	14	93.3333	Accessory
ehuA	0	0	Accessory
elaA	0	0	Accessory
elaC	0	0	Accessory
elsH	0	0	Accessory
elyC	0	0	Accessory
endA	15	100	Core
engA	0	0	Accessory
eno	0	0	Accessory
entS	15	100	Core
epsA	0	0	Accessory
epsB	0	0	Accessory
epsE	7	46.6667	Accessory
epsF	0	0	Accessory
epsG	0	0	Accessory
epsH	6	40	Accessory
epsJ	0	0	Accessory
epsJ~~~wcaA	0	0	Accessory
epsL	0	0	Accessory
epsN	0	0	Accessory
epsV	0	0	Accessory
epuA	0	0	Accessory
era	15	100	Core
eriC	0	0	Accessory
ermB	0	0	Accessory
ermL~~~ermC	0	0	Accessory
esaA	0	0	Accessory
esaC	0	0	Accessory
escB	0	0	Accessory
essA	0	0	Accessory
essB	0	0	Accessory
essC	0	0	Accessory
essC~~~ftsK	11	73.3333	Accessory
esxA	0	0	Accessory
eutA	0	0	Accessory
eutC	1	6.66667	Accessory
eutD	0	0	Accessory
eutH	1	6.66667	Accessory
eutJ	0	0	Accessory
eutL	0	0	Accessory
eutM	0	0	Accessory
eutN	0	0	Accessory
eutP	1	6.66667	Accessory
eutQ	0	0	Accessory
exoY~~~wcaJ	0	0	Accessory
exp7~~~mgtA	15	100	Core
exp8	0	0	Accessory
ezrA	15	100	Core
fAU1	0	0	Accessory
fIDO	0	0	Accessory
fMR2	0	0	Accessory
fabD	0	0	Accessory
fabF	15	100	Core
fabG	15	100	Core
fabH	15	100	Core
fabK	15	100	Core
fabM	0	0	Accessory
fabZ	15	100	Core
fabZ~~~fatA	0	0	Accessory
fabZ~~~paaI	15	100	Core
fabZ~~~spxR	0	0	Accessory
fadH2	0	0	Accessory
fadM	0	0	Accessory
fasA	0	0	Accessory
fatA	0	0	Accessory
fba	15	100	Core
fbp	5	33.3333	Accessory
fbpA	0	0	Accessory
fbpB	0	0	Accessory
fctA	8	53.3333	Accessory
femA	0	0	Accessory
femA~~~murN	10	66.6667	Accessory
femB~~~fmhB	0	0	Accessory
feoA	3	20	Accessory
feoB	0	0	Accessory
fer	4	26.6667	Accessory
ffh	15	100	Core
fghA	0	0	Accessory
fhs	0	0	Accessory
fhs1	13	86.6667	Accessory
fhs~~~fhs2	15	100	Core
fibA	0	0	Accessory
fieF	0	0	Accessory
fieF~~~mntE	0	0	Accessory
fimA	0	0	Accessory
fimB	0	0	Accessory
fimC	0	0	Accessory
flaA1	0	0	Accessory
fldA	15	100	Core
flgJ	0	0	Accessory
flgM	15	100	Core
fliA	0	0	Accessory
fliJ	0	0	Accessory
fliK	0	0	Accessory
fliS	1	6.66667	Accessory
fmhB	0	0	Accessory
fmnP	0	0	Accessory
fmt	0	0	Accessory
fmtA	0	0	Accessory
fni	15	100	Core
focA	0	0	Accessory
folA	0	0	Accessory
folB	0	0	Accessory
folC	15	100	Core
folD	15	100	Core
folE	11	73.3333	Accessory
folK	11	73.3333	Accessory
folK~~~folB	0	0	Accessory
folP	11	73.3333	Accessory
folT	0	0	Accessory
frmA	0	0	Accessory
frmB	15	100	Core
frr	15	100	Core
fruA	0	0	Accessory
fruA~~~luxR	11	73.3333	Accessory
frvX	13	86.6667	Accessory
fsa	8	53.3333	Accessory
fszA	2	13.3333	Accessory
ftcD	13	86.6667	Accessory
ftf	0	0	Accessory
ftsA	0	0	Accessory
ftsB	0	0	Accessory
ftsE	0	0	Accessory
ftsH	0	0	Accessory
ftsJ	0	0	Accessory
ftsK	0	0	Accessory
ftsL	5	33.3333	Accessory
ftsQ	0	0	Accessory
ftsW	0	0	Accessory
ftsX	0	0	Accessory
ftsY	15	100	Core
ftsZ	15	100	Core
ftsZ~~~murF	0	0	Accessory
fucI	0	0	Accessory
fucO	2	13.3333	Accessory
fucO~~~gldA	2	13.3333	Accessory
funZ	0	0	Accessory
fur	0	0	Accessory
fusA	0	0	Accessory
galA	0	0	Accessory
galE	6	40	Accessory
galK	15	100	Core
galM	0	0	Accessory
galR	0	0	Accessory
galT	0	0	Accessory
galT2~~~galT	0	0	Accessory
galU	15	100	Core
ganA	15	100	Core
gap	0	0	Accessory
gapN	0	0	Accessory
gatA	15	100	Core
gatB	15	100	Core
gatC	15	100	Core
gbpC	0	0	Accessory
gdhA	15	100	Core
gdmH	0	0	Accessory
gdpP	15	100	Core
gldA	15	100	Core
glf	0	0	Accessory
glgA	15	100	Core
glgB	15	100	Core
glgC	15	100	Core
glgD	15	100	Core
glgP	0	0	Accessory
glmM	15	100	Core
glmS	15	100	Core
glmU	15	100	Core
glnA	11	73.3333	Accessory
glnH	0	0	Accessory
glnK	0	0	Accessory
glnQ	0	0	Accessory
glnQ~~~artM	15	100	Core
glnQ~~~yxeN	15	100	Core
glnR	0	0	Accessory
glnR~~~merR	14	93.3333	Accessory
gloA	2	13.3333	Accessory
gloB	15	100	Core
gloB~~~yqgX	0	0	Accessory
glpE	0	0	Accessory
glpE~~~moeZ~~~pspE	15	100	Core
glpF	0	0	Accessory
glpG	0	0	Accessory
glpK	15	100	Core
glpO	4	26.6667	Accessory
glpR	0	0	Accessory
gltA	0	0	Accessory
gltB	0	0	Accessory
gltC	3	20	Accessory
gltD	0	0	Accessory
gltX	15	100	Core
gluP	4	26.6667	Accessory
glvR	0	0	Accessory
glxK	0	0	Accessory
gly	0	0	Accessory
glyA	15	100	Core
glyE	0	0	Accessory
glyG	0	0	Accessory
glyP~~~alsT	14	93.3333	Accessory
glyQ	15	100	Core
glyS	0	0	Accessory
gmk	0	0	Accessory
gmuD	1	6.66667	Accessory
gndA	15	100	Core
gntR	0	0	Accessory
gntR~~~aRO8	0	0	Accessory
gntR~~~ubiC	15	100	Core
gntR~~~ytrA~~~yhcF	0	0	Accessory
gntR~~~yvoA~~~mngR	15	100	Core
gntX	0	0	Accessory
gor	0	0	Accessory
gorA	15	100	Core
gph	0	0	Accessory
gpmA	15	100	Core
gpmB2	0	0	Accessory
gpsA	15	100	Core
gpsB	0	0	Accessory
greA	0	0	Accessory
groES	11	73.3333	Accessory
groL	11	73.3333	Accessory
group_0	0	0	Accessory
group_1	2	13.3333	Accessory
group_10	0	0	Accessory
group_100	0	0	Accessory
group_1000	0	0	Accessory
group_10000	0	0	Accessory
group_10001	0	0	Accessory
group_10002	0	0	Accessory
group_10003	0	0	Accessory
group_10004	0	0	Accessory
group_10005	0	0	Accessory
group_10006	0	0	Accessory
group_10007	1	6.66667	Accessory
group_10008	0	0	Accessory
group_10009	0	0	Accessory
group_1001	0	0	Accessory
group_10010	0	0	Accessory
group_10011	0	0	Accessory
group_10012	1	6.66667	Accessory
group_10013	1	6.66667	Accessory
group_10014	0	0	Accessory
group_10015	0	0	Accessory
group_10016	0	0	Accessory
group_10017	0	0	Accessory
group_10018	0	0	Accessory
group_10019	1	6.66667	Accessory
group_1002	0	0	Accessory
group_10020	0	0	Accessory
group_10021	0	0	Accessory
group_10022	0	0	Accessory
group_10023	0	0	Accessory
group_10024	0	0	Accessory
group_10025	0	0	Accessory
group_10026	0	0	Accessory
group_10027	0	0	Accessory
group_10028	0	0	Accessory
group_10029	1	6.66667	Accessory
group_1003	2	13.3333	Accessory
group_10030	0	0	Accessory
group_10031	0	0	Accessory
group_10032	0	0	Accessory
group_10033	0	0	Accessory
group_10034	0	0	Accessory
group_10035	0	0	Accessory
group_10036	0	0	Accessory
group_10037	0	0	Accessory
group_10038	0	0	Accessory
group_10039	0	0	Accessory
group_1004	0	0	Accessory
group_10040	1	6.66667	Accessory
group_10041	0	0	Accessory
group_10042	0	0	Accessory
group_10043	0	0	Accessory
group_10044	0	0	Accessory
group_10045	0	0	Accessory
group_10046	0	0	Accessory
group_10047	0	0	Accessory
group_10048	0	0	Accessory
group_10049	1	6.66667	Accessory
group_1005	1	6.66667	Accessory
group_10050	1	6.66667	Accessory
group_10051	0	0	Accessory
group_10052	0	0	Accessory
group_10053	1	6.66667	Accessory
group_10054	0	0	Accessory
group_10055	0	0	Accessory
group_10056	0	0	Accessory
group_10057	0	0	Accessory
group_10058	0	0	Accessory
group_10059	0	0	Accessory
group_1006	1	6.66667	Accessory
group_10060	0	0	Accessory
group_10061	0	0	Accessory
group_10062	0	0	Accessory
group_10063	0	0	Accessory
group_10064	0	0	Accessory
group_10065	1	6.66667	Accessory
group_10066	0	0	Accessory
group_10067	0	0	Accessory
group_10068	0	0	Accessory
group_10069	0	0	Accessory
group_1007	3	20	Accessory
group_10070	0	0	Accessory
group_10071	0	0	Accessory
group_10072	0	0	Accessory
group_10073	1	6.66667	Accessory
group_10074	0	0	Accessory
group_10075	0	0	Accessory
group_10076	0	0	Accessory
group_10077	0	0	Accessory
group_10078	0	0	Accessory
group_10079	0	0	Accessory
group_1008	0	0	Accessory
group_10080	2	13.3333	Accessory
group_10081	1	6.66667	Accessory
group_10082	0	0	Accessory
group_10083	0	0	Accessory
group_10084	0	0	Accessory
group_10085	0	0	Accessory
group_10086	0	0	Accessory
group_10087	0	0	Accessory
group_10088	0	0	Accessory
group_10089	0	0	Accessory
group_1009	15	100	Core
group_10090	0	0	Accessory
group_10091	0	0	Accessory
group_10092	0	0	Accessory
group_10093	0	0	Accessory
group_10094	0	0	Accessory
group_10095	0	0	Accessory
group_10096	0	0	Accessory
group_10097	0	0	Accessory
group_10098	0	0	Accessory
group_10099	0	0	Accessory
group_101	2	13.3333	Accessory
group_1010	0	0	Accessory
group_10100	0	0	Accessory
group_10101	0	0	Accessory
group_10102	0	0	Accessory
group_10103	0	0	Accessory
group_10104	0	0	Accessory
group_10105	0	0	Accessory
group_10106	0	0	Accessory
group_10107	0	0	Accessory
group_10108	0	0	Accessory
group_10109	2	13.3333	Accessory
group_1011	0	0	Accessory
group_10110	0	0	Accessory
group_10111	0	0	Accessory
group_10112	0	0	Accessory
group_10113	0	0	Accessory
group_10114	0	0	Accessory
group_10115	0	0	Accessory
group_10116	0	0	Accessory
group_10117	0	0	Accessory
group_10118	0	0	Accessory
group_10119	0	0	Accessory
group_1012	0	0	Accessory
group_10120	0	0	Accessory
group_10121	0	0	Accessory
group_10122	0	0	Accessory
group_10123	0	0	Accessory
group_10124	0	0	Accessory
group_10125	0	0	Accessory
group_10126	0	0	Accessory
group_10127	0	0	Accessory
group_10128	0	0	Accessory
group_10129	0	0	Accessory
group_1013	2	13.3333	Accessory
group_10130	1	6.66667	Accessory
group_10131	0	0	Accessory
group_10132	0	0	Accessory
group_10133	0	0	Accessory
group_10134	0	0	Accessory
group_10135	1	6.66667	Accessory
group_10136	1	6.66667	Accessory
group_10137	0	0	Accessory
group_10138	2	13.3333	Accessory
group_10139	1	6.66667	Accessory
group_1014	0	0	Accessory
group_10140	0	0	Accessory
group_10141	0	0	Accessory
group_10142	1	6.66667	Accessory
group_10143	0	0	Accessory
group_10144	0	0	Accessory
group_10145	0	0	Accessory
group_10146	1	6.66667	Accessory
group_10147	0	0	Accessory
group_10148	0	0	Accessory
group_10149	0	0	Accessory
group_1015	0	0	Accessory
group_10150	0	0	Accessory
group_10151	0	0	Accessory
group_10152	0	0	Accessory
group_10153	0	0	Accessory
group_10154	0	0	Accessory
group_10155	0	0	Accessory
group_10156	0	0	Accessory
group_10157	0	0	Accessory
group_10158	0	0	Accessory
group_10159	0	0	Accessory
group_1016	0	0	Accessory
group_10160	0	0	Accessory
group_10161	0	0	Accessory
group_10162	0	0	Accessory
group_10163	0	0	Accessory
group_10164	0	0	Accessory
group_10165	0	0	Accessory
group_10166	0	0	Accessory
group_10167	0	0	Accessory
group_10168	0	0	Accessory
group_10169	0	0	Accessory
group_1017	0	0	Accessory
group_10170	1	6.66667	Accessory
group_10171	1	6.66667	Accessory
group_10172	0	0	Accessory
group_10173	0	0	Accessory
group_10174	0	0	Accessory
group_10175	0	0	Accessory
group_10176	0	0	Accessory
group_10177	0	0	Accessory
group_10178	0	0	Accessory
group_10179	0	0	Accessory
group_1018	0	0	Accessory
group_10180	0	0	Accessory
group_10181	0	0	Accessory
group_10182	0	0	Accessory
group_10183	0	0	Accessory
group_10184	0	0	Accessory
group_10185	1	6.66667	Accessory
group_10186	0	0	Accessory
group_10187	0	0	Accessory
group_10188	0	0	Accessory
group_10189	0	0	Accessory
group_1019	1	6.66667	Accessory
group_10190	0	0	Accessory
group_10191	0	0	Accessory
group_10192	0	0	Accessory
group_10193	2	13.3333	Accessory
group_10194	0	0	Accessory
group_10195	0	0	Accessory
group_10196	0	0	Accessory
group_10197	0	0	Accessory
group_10198	0	0	Accessory
group_10199	0	0	Accessory
group_102	0	0	Accessory
group_1020	1	6.66667	Accessory
group_10200	0	0	Accessory
group_10201	0	0	Accessory
group_10202	0	0	Accessory
group_10203	0	0	Accessory
group_10204	0	0	Accessory
group_10205	1	6.66667	Accessory
group_10206	0	0	Accessory
group_10207	0	0	Accessory
group_10208	0	0	Accessory
group_10209	0	0	Accessory
group_1021	1	6.66667	Accessory
group_10210	0	0	Accessory
group_10211	0	0	Accessory
group_10212	0	0	Accessory
group_10213	0	0	Accessory
group_10214	0	0	Accessory
group_10215	0	0	Accessory
group_10216	0	0	Accessory
group_10217	0	0	Accessory
group_10218	0	0	Accessory
group_10219	2	13.3333	Accessory
group_1022	0	0	Accessory
group_10220	0	0	Accessory
group_10221	0	0	Accessory
group_10222	0	0	Accessory
group_10223	0	0	Accessory
group_10224	0	0	Accessory
group_10225	0	0	Accessory
group_10226	0	0	Accessory
group_10227	0	0	Accessory
group_10228	0	0	Accessory
group_10229	0	0	Accessory
group_1023	0	0	Accessory
group_10230	0	0	Accessory
group_10231	0	0	Accessory
group_10232	0	0	Accessory
group_10233	0	0	Accessory
group_10234	0	0	Accessory
group_10235	0	0	Accessory
group_10236	0	0	Accessory
group_10237	0	0	Accessory
group_10238	0	0	Accessory
group_10239	0	0	Accessory
group_1024	0	0	Accessory
group_10240	0	0	Accessory
group_10241	0	0	Accessory
group_10242	0	0	Accessory
group_10243	0	0	Accessory
group_10244	1	6.66667	Accessory
group_10245	0	0	Accessory
group_10246	0	0	Accessory
group_10247	0	0	Accessory
group_10248	0	0	Accessory
group_10249	0	0	Accessory
group_1025	0	0	Accessory
group_10250	2	13.3333	Accessory
group_10251	1	6.66667	Accessory
group_10252	0	0	Accessory
group_10253	0	0	Accessory
group_10254	0	0	Accessory
group_10255	0	0	Accessory
group_10256	0	0	Accessory
group_10257	0	0	Accessory
group_10258	2	13.3333	Accessory
group_10259	0	0	Accessory
group_1026	0	0	Accessory
group_10260	0	0	Accessory
group_10261	0	0	Accessory
group_10262	0	0	Accessory
group_10263	0	0	Accessory
group_10264	0	0	Accessory
group_10265	0	0	Accessory
group_10266	0	0	Accessory
group_10267	0	0	Accessory
group_10268	0	0	Accessory
group_10269	0	0	Accessory
group_1027	0	0	Accessory
group_10270	0	0	Accessory
group_10271	0	0	Accessory
group_10272	0	0	Accessory
group_10273	0	0	Accessory
group_10274	0	0	Accessory
group_10275	0	0	Accessory
group_10276	1	6.66667	Accessory
group_10277	0	0	Accessory
group_10278	0	0	Accessory
group_10279	0	0	Accessory
group_1028	0	0	Accessory
group_10280	0	0	Accessory
group_10281	0	0	Accessory
group_10282	0	0	Accessory
group_10283	1	6.66667	Accessory
group_10284	1	6.66667	Accessory
group_10285	1	6.66667	Accessory
group_10286	0	0	Accessory
group_10287	0	0	Accessory
group_10288	0	0	Accessory
group_10289	1	6.66667	Accessory
group_1029	3	20	Accessory
group_10290	1	6.66667	Accessory
group_10291	1	6.66667	Accessory
group_10292	0	0	Accessory
group_10293	0	0	Accessory
group_10294	0	0	Accessory
group_10295	0	0	Accessory
group_10296	0	0	Accessory
group_10297	1	6.66667	Accessory
group_10298	1	6.66667	Accessory
group_10299	0	0	Accessory
group_103	0	0	Accessory
group_1030	0	0	Accessory
group_10300	0	0	Accessory
group_10301	0	0	Accessory
group_10302	0	0	Accessory
group_10303	0	0	Accessory
group_10304	0	0	Accessory
group_10305	0	0	Accessory
group_10306	0	0	Accessory
group_10307	1	6.66667	Accessory
group_10308	1	6.66667	Accessory
group_10309	0	0	Accessory
group_1031	15	100	Core
group_10310	0	0	Accessory
group_10311	0	0	Accessory
group_10312	0	0	Accessory
group_10313	0	0	Accessory
group_10314	0	0	Accessory
group_10315	1	6.66667	Accessory
group_10316	0	0	Accessory
group_10317	0	0	Accessory
group_10318	0	0	Accessory
group_10319	0	0	Accessory
group_1032	0	0	Accessory
group_10320	1	6.66667	Accessory
group_10321	4	26.6667	Accessory
group_10322	0	0	Accessory
group_10323	0	0	Accessory
group_10324	0	0	Accessory
group_10325	0	0	Accessory
group_10326	0	0	Accessory
group_10327	0	0	Accessory
group_10328	0	0	Accessory
group_10329	1	6.66667	Accessory
group_1033	15	100	Core
group_10330	0	0	Accessory
group_10331	0	0	Accessory
group_10332	0	0	Accessory
group_10333	0	0	Accessory
group_10334	0	0	Accessory
group_10335	0	0	Accessory
group_10336	0	0	Accessory
group_10337	0	0	Accessory
group_10338	0	0	Accessory
group_10339	0	0	Accessory
group_1034	11	73.3333	Accessory
group_10340	0	0	Accessory
group_10341	0	0	Accessory
group_10342	0	0	Accessory
group_10343	0	0	Accessory
group_10344	0	0	Accessory
group_10345	0	0	Accessory
group_10346	0	0	Accessory
group_10347	0	0	Accessory
group_10348	0	0	Accessory
group_10349	0	0	Accessory
group_1035	1	6.66667	Accessory
group_10350	0	0	Accessory
group_10351	0	0	Accessory
group_10352	0	0	Accessory
group_10353	1	6.66667	Accessory
group_10354	1	6.66667	Accessory
group_10355	1	6.66667	Accessory
group_10356	0	0	Accessory
group_10357	0	0	Accessory
group_10358	1	6.66667	Accessory
group_10359	1	6.66667	Accessory
group_1036	0	0	Accessory
group_10360	0	0	Accessory
group_10361	0	0	Accessory
group_10362	0	0	Accessory
group_10363	0	0	Accessory
group_10364	2	13.3333	Accessory
group_10365	0	0	Accessory
group_10366	0	0	Accessory
group_10367	0	0	Accessory
group_10368	0	0	Accessory
group_10369	0	0	Accessory
group_1037	7	46.6667	Accessory
group_10370	1	6.66667	Accessory
group_10371	0	0	Accessory
group_10372	0	0	Accessory
group_10373	0	0	Accessory
group_10374	0	0	Accessory
group_10375	0	0	Accessory
group_10376	0	0	Accessory
group_10377	0	0	Accessory
group_10378	0	0	Accessory
group_10379	1	6.66667	Accessory
group_1038	0	0	Accessory
group_10380	2	13.3333	Accessory
group_10381	0	0	Accessory
group_10382	0	0	Accessory
group_10383	0	0	Accessory
group_10384	0	0	Accessory
group_10385	0	0	Accessory
group_10386	0	0	Accessory
group_10387	0	0	Accessory
group_10388	0	0	Accessory
group_10389	0	0	Accessory
group_1039	0	0	Accessory
group_10390	0	0	Accessory
group_10391	0	0	Accessory
group_10392	1	6.66667	Accessory
group_10393	0	0	Accessory
group_10394	0	0	Accessory
group_10395	0	0	Accessory
group_10396	0	0	Accessory
group_10397	0	0	Accessory
group_10398	0	0	Accessory
group_10399	0	0	Accessory
group_104	0	0	Accessory
group_1040	3	20	Accessory
group_10400	0	0	Accessory
group_10401	0	0	Accessory
group_10402	0	0	Accessory
group_10403	0	0	Accessory
group_10404	0	0	Accessory
group_10405	0	0	Accessory
group_10406	1	6.66667	Accessory
group_10407	0	0	Accessory
group_10408	0	0	Accessory
group_10409	0	0	Accessory
group_1041	0	0	Accessory
group_10410	0	0	Accessory
group_10411	0	0	Accessory
group_10412	0	0	Accessory
group_10413	0	0	Accessory
group_10414	0	0	Accessory
group_10415	0	0	Accessory
group_10416	1	6.66667	Accessory
group_10417	0	0	Accessory
group_10418	0	0	Accessory
group_10419	0	0	Accessory
group_1042	0	0	Accessory
group_10420	0	0	Accessory
group_10421	0	0	Accessory
group_10422	1	6.66667	Accessory
group_10423	0	0	Accessory
group_10424	0	0	Accessory
group_10425	0	0	Accessory
group_10426	0	0	Accessory
group_10427	1	6.66667	Accessory
group_10428	1	6.66667	Accessory
group_10429	0	0	Accessory
group_1043	0	0	Accessory
group_10430	0	0	Accessory
group_10431	0	0	Accessory
group_10432	0	0	Accessory
group_10433	1	6.66667	Accessory
group_10434	0	0	Accessory
group_10435	0	0	Accessory
group_10436	0	0	Accessory
group_10437	0	0	Accessory
group_10438	0	0	Accessory
group_10439	0	0	Accessory
group_1044	0	0	Accessory
group_10440	0	0	Accessory
group_10441	0	0	Accessory
group_10442	0	0	Accessory
group_10443	1	6.66667	Accessory
group_10444	2	13.3333	Accessory
group_10445	0	0	Accessory
group_10446	0	0	Accessory
group_10447	0	0	Accessory
group_10448	0	0	Accessory
group_10449	0	0	Accessory
group_1045	0	0	Accessory
group_10450	0	0	Accessory
group_10451	0	0	Accessory
group_10452	1	6.66667	Accessory
group_10453	0	0	Accessory
group_10454	0	0	Accessory
group_10455	1	6.66667	Accessory
group_10456	1	6.66667	Accessory
group_10457	0	0	Accessory
group_10458	0	0	Accessory
group_10459	0	0	Accessory
group_1046	0	0	Accessory
group_10460	0	0	Accessory
group_10461	0	0	Accessory
group_10462	0	0	Accessory
group_10463	0	0	Accessory
group_10464	0	0	Accessory
group_10465	0	0	Accessory
group_10466	0	0	Accessory
group_10467	0	0	Accessory
group_10468	0	0	Accessory
group_10469	0	0	Accessory
group_1047	0	0	Accessory
group_10470	0	0	Accessory
group_10471	0	0	Accessory
group_10472	0	0	Accessory
group_10473	0	0	Accessory
group_10474	1	6.66667	Accessory
group_10475	1	6.66667	Accessory
group_10476	0	0	Accessory
group_10477	0	0	Accessory
group_10478	0	0	Accessory
group_10479	0	0	Accessory
group_1048	0	0	Accessory
group_10480	0	0	Accessory
group_10481	0	0	Accessory
group_10482	0	0	Accessory
group_10483	1	6.66667	Accessory
group_10484	0	0	Accessory
group_10485	0	0	Accessory
group_10486	0	0	Accessory
group_10487	0	0	Accessory
group_10488	0	0	Accessory
group_10489	1	6.66667	Accessory
group_1049	0	0	Accessory
group_10490	0	0	Accessory
group_10491	0	0	Accessory
group_10492	0	0	Accessory
group_10493	0	0	Accessory
group_10494	0	0	Accessory
group_10495	0	0	Accessory
group_10496	0	0	Accessory
group_10497	0	0	Accessory
group_10498	0	0	Accessory
group_10499	0	0	Accessory
group_105	2	13.3333	Accessory
group_1050	0	0	Accessory
group_10500	1	6.66667	Accessory
group_10501	1	6.66667	Accessory
group_10502	0	0	Accessory
group_10503	0	0	Accessory
group_10504	0	0	Accessory
group_10505	0	0	Accessory
group_10506	2	13.3333	Accessory
group_10507	0	0	Accessory
group_10508	0	0	Accessory
group_10509	0	0	Accessory
group_1051	15	100	Core
group_10510	0	0	Accessory
group_10511	0	0	Accessory
group_10512	0	0	Accessory
group_10513	1	6.66667	Accessory
group_10514	1	6.66667	Accessory
group_10515	1	6.66667	Accessory
group_10516	1	6.66667	Accessory
group_10517	2	13.3333	Accessory
group_10518	1	6.66667	Accessory
group_10519	0	0	Accessory
group_1052	0	0	Accessory
group_10520	1	6.66667	Accessory
group_10521	0	0	Accessory
group_10522	0	0	Accessory
group_10523	0	0	Accessory
group_10524	0	0	Accessory
group_10525	0	0	Accessory
group_10526	0	0	Accessory
group_10527	0	0	Accessory
group_10528	0	0	Accessory
group_10529	0	0	Accessory
group_1053	3	20	Accessory
group_10530	0	0	Accessory
group_10531	0	0	Accessory
group_10532	0	0	Accessory
group_10533	0	0	Accessory
group_10534	0	0	Accessory
group_10535	0	0	Accessory
group_10536	0	0	Accessory
group_10537	0	0	Accessory
group_10538	0	0	Accessory
group_10539	0	0	Accessory
group_1054	0	0	Accessory
group_10540	0	0	Accessory
group_10541	0	0	Accessory
group_10542	0	0	Accessory
group_10543	0	0	Accessory
group_10544	0	0	Accessory
group_10545	1	6.66667	Accessory
group_10546	0	0	Accessory
group_10547	0	0	Accessory
group_10548	2	13.3333	Accessory
group_10549	1	6.66667	Accessory
group_1055	0	0	Accessory
group_10550	0	0	Accessory
group_10551	0	0	Accessory
group_10552	0	0	Accessory
group_10553	0	0	Accessory
group_10554	0	0	Accessory
group_10555	0	0	Accessory
group_10556	0	0	Accessory
group_10557	0	0	Accessory
group_10558	0	0	Accessory
group_10559	0	0	Accessory
group_1056	0	0	Accessory
group_10560	0	0	Accessory
group_10561	0	0	Accessory
group_10562	0	0	Accessory
group_10563	0	0	Accessory
group_10564	0	0	Accessory
group_10565	0	0	Accessory
group_10566	0	0	Accessory
group_10567	0	0	Accessory
group_10568	0	0	Accessory
group_10569	0	0	Accessory
group_1057	0	0	Accessory
group_10570	0	0	Accessory
group_10571	1	6.66667	Accessory
group_10572	0	0	Accessory
group_10573	1	6.66667	Accessory
group_10574	0	0	Accessory
group_10575	0	0	Accessory
group_10576	0	0	Accessory
group_10577	0	0	Accessory
group_10578	0	0	Accessory
group_10579	2	13.3333	Accessory
group_1058	2	13.3333	Accessory
group_10580	2	13.3333	Accessory
group_10581	0	0	Accessory
group_10582	0	0	Accessory
group_10583	0	0	Accessory
group_10584	0	0	Accessory
group_10585	0	0	Accessory
group_10586	0	0	Accessory
group_10587	0	0	Accessory
group_10588	1	6.66667	Accessory
group_10589	0	0	Accessory
group_1059	0	0	Accessory
group_10590	0	0	Accessory
group_10591	0	0	Accessory
group_10592	0	0	Accessory
group_10593	0	0	Accessory
group_10594	1	6.66667	Accessory
group_10595	1	6.66667	Accessory
group_10596	1	6.66667	Accessory
group_10597	0	0	Accessory
group_10598	0	0	Accessory
group_10599	0	0	Accessory
group_106	0	0	Accessory
group_1060	0	0	Accessory
group_10600	0	0	Accessory
group_10601	0	0	Accessory
group_10602	0	0	Accessory
group_10603	0	0	Accessory
group_10604	0	0	Accessory
group_10605	0	0	Accessory
group_10606	0	0	Accessory
group_10607	1	6.66667	Accessory
group_10608	1	6.66667	Accessory
group_10609	1	6.66667	Accessory
group_1061	0	0	Accessory
group_10610	1	6.66667	Accessory
group_10611	1	6.66667	Accessory
group_10612	1	6.66667	Accessory
group_10613	0	0	Accessory
group_10614	0	0	Accessory
group_10615	0	0	Accessory
group_10616	0	0	Accessory
group_10617	0	0	Accessory
group_10618	1	6.66667	Accessory
group_10619	1	6.66667	Accessory
group_1062	0	0	Accessory
group_10620	2	13.3333	Accessory
group_10621	1	6.66667	Accessory
group_10622	0	0	Accessory
group_10623	0	0	Accessory
group_10624	0	0	Accessory
group_10625	0	0	Accessory
group_10626	0	0	Accessory
group_10627	0	0	Accessory
group_10628	0	0	Accessory
group_10629	0	0	Accessory
group_1063	0	0	Accessory
group_10630	0	0	Accessory
group_10631	0	0	Accessory
group_10632	0	0	Accessory
group_10633	0	0	Accessory
group_10634	0	0	Accessory
group_10635	0	0	Accessory
group_10636	0	0	Accessory
group_10637	1	6.66667	Accessory
group_10638	1	6.66667	Accessory
group_10639	0	0	Accessory
group_1064	0	0	Accessory
group_10640	0	0	Accessory
group_10641	0	0	Accessory
group_10642	0	0	Accessory
group_10643	0	0	Accessory
group_10644	0	0	Accessory
group_10645	0	0	Accessory
group_10646	0	0	Accessory
group_10647	0	0	Accessory
group_10648	0	0	Accessory
group_10649	0	0	Accessory
group_1065	0	0	Accessory
group_10650	0	0	Accessory
group_10651	0	0	Accessory
group_10652	0	0	Accessory
group_10653	0	0	Accessory
group_10654	1	6.66667	Accessory
group_10655	0	0	Accessory
group_10656	0	0	Accessory
group_10657	0	0	Accessory
group_10658	0	0	Accessory
group_10659	1	6.66667	Accessory
group_1066	0	0	Accessory
group_10660	0	0	Accessory
group_10661	0	0	Accessory
group_10662	0	0	Accessory
group_10663	0	0	Accessory
group_10664	0	0	Accessory
group_10665	1	6.66667	Accessory
group_10666	0	0	Accessory
group_10667	0	0	Accessory
group_10668	0	0	Accessory
group_10669	0	0	Accessory
group_1067	0	0	Accessory
group_10670	0	0	Accessory
group_10671	0	0	Accessory
group_10672	0	0	Accessory
group_10673	0	0	Accessory
group_10674	0	0	Accessory
group_10675	0	0	Accessory
group_10676	0	0	Accessory
group_10677	0	0	Accessory
group_10678	0	0	Accessory
group_10679	0	0	Accessory
group_1068	0	0	Accessory
group_10680	0	0	Accessory
group_10681	0	0	Accessory
group_10682	0	0	Accessory
group_10683	0	0	Accessory
group_10684	0	0	Accessory
group_10685	0	0	Accessory
group_10686	0	0	Accessory
group_10687	0	0	Accessory
group_10688	0	0	Accessory
group_10689	0	0	Accessory
group_1069	4	26.6667	Accessory
group_10690	0	0	Accessory
group_10691	3	20	Accessory
group_10692	0	0	Accessory
group_10693	0	0	Accessory
group_10694	0	0	Accessory
group_10695	0	0	Accessory
group_10696	0	0	Accessory
group_10697	0	0	Accessory
group_10698	0	0	Accessory
group_10699	0	0	Accessory
group_107	0	0	Accessory
group_1070	0	0	Accessory
group_10700	0	0	Accessory
group_10701	0	0	Accessory
group_10702	1	6.66667	Accessory
group_10703	1	6.66667	Accessory
group_10704	0	0	Accessory
group_10705	1	6.66667	Accessory
group_10706	0	0	Accessory
group_10707	0	0	Accessory
group_10708	0	0	Accessory
group_10709	0	0	Accessory
group_1071	2	13.3333	Accessory
group_10710	0	0	Accessory
group_10711	0	0	Accessory
group_10712	0	0	Accessory
group_10713	0	0	Accessory
group_10714	0	0	Accessory
group_10715	0	0	Accessory
group_10716	0	0	Accessory
group_10717	0	0	Accessory
group_10718	0	0	Accessory
group_10719	0	0	Accessory
group_1072	0	0	Accessory
group_10720	0	0	Accessory
group_10721	0	0	Accessory
group_10722	0	0	Accessory
group_10723	0	0	Accessory
group_10724	0	0	Accessory
group_10725	0	0	Accessory
group_10726	0	0	Accessory
group_10727	0	0	Accessory
group_10728	0	0	Accessory
group_10729	0	0	Accessory
group_1073	0	0	Accessory
group_10730	0	0	Accessory
group_10731	0	0	Accessory
group_10732	0	0	Accessory
group_10733	0	0	Accessory
group_10734	0	0	Accessory
group_10735	0	0	Accessory
group_10736	0	0	Accessory
group_10737	0	0	Accessory
group_10738	0	0	Accessory
group_10739	0	0	Accessory
group_1074	0	0	Accessory
group_10740	0	0	Accessory
group_10741	0	0	Accessory
group_10742	2	13.3333	Accessory
group_10743	0	0	Accessory
group_10744	0	0	Accessory
group_10745	0	0	Accessory
group_10746	0	0	Accessory
group_10747	0	0	Accessory
group_10748	0	0	Accessory
group_10749	1	6.66667	Accessory
group_1075	0	0	Accessory
group_10750	0	0	Accessory
group_10751	0	0	Accessory
group_10752	0	0	Accessory
group_10753	0	0	Accessory
group_10754	0	0	Accessory
group_10755	0	0	Accessory
group_10756	0	0	Accessory
group_10757	0	0	Accessory
group_10758	0	0	Accessory
group_10759	0	0	Accessory
group_1076	0	0	Accessory
group_10760	0	0	Accessory
group_10761	0	0	Accessory
group_10762	0	0	Accessory
group_10763	1	6.66667	Accessory
group_10764	0	0	Accessory
group_10765	0	0	Accessory
group_10766	0	0	Accessory
group_10767	0	0	Accessory
group_10768	0	0	Accessory
group_10769	0	0	Accessory
group_1077	0	0	Accessory
group_10770	0	0	Accessory
group_10771	0	0	Accessory
group_10772	0	0	Accessory
group_10773	0	0	Accessory
group_10774	0	0	Accessory
group_10775	0	0	Accessory
group_10776	0	0	Accessory
group_10777	0	0	Accessory
group_10778	1	6.66667	Accessory
group_10779	0	0	Accessory
group_1078	0	0	Accessory
group_10780	0	0	Accessory
group_10781	11	73.3333	Accessory
group_10782	0	0	Accessory
group_10783	0	0	Accessory
group_10784	0	0	Accessory
group_10785	0	0	Accessory
group_10786	0	0	Accessory
group_10787	0	0	Accessory
group_10788	0	0	Accessory
group_10789	0	0	Accessory
group_1079	0	0	Accessory
group_10790	0	0	Accessory
group_10791	0	0	Accessory
group_10792	0	0	Accessory
group_10793	0	0	Accessory
group_10794	1	6.66667	Accessory
group_10795	1	6.66667	Accessory
group_10796	0	0	Accessory
group_10797	0	0	Accessory
group_10798	1	6.66667	Accessory
group_10799	0	0	Accessory
group_108	0	0	Accessory
group_1080	0	0	Accessory
group_10800	1	6.66667	Accessory
group_10801	0	0	Accessory
group_10802	0	0	Accessory
group_10803	0	0	Accessory
group_10804	0	0	Accessory
group_10805	0	0	Accessory
group_10806	0	0	Accessory
group_10807	0	0	Accessory
group_10808	2	13.3333	Accessory
group_10809	1	6.66667	Accessory
group_1081	0	0	Accessory
group_10810	0	0	Accessory
group_10811	0	0	Accessory
group_10812	0	0	Accessory
group_10813	0	0	Accessory
group_10814	0	0	Accessory
group_10815	0	0	Accessory
group_10816	0	0	Accessory
group_10817	0	0	Accessory
group_10818	0	0	Accessory
group_10819	0	0	Accessory
group_1082	0	0	Accessory
group_10820	0	0	Accessory
group_10821	0	0	Accessory
group_10822	0	0	Accessory
group_10823	0	0	Accessory
group_10824	0	0	Accessory
group_10825	0	0	Accessory
group_10826	0	0	Accessory
group_10827	0	0	Accessory
group_10828	0	0	Accessory
group_10829	0	0	Accessory
group_1083	0	0	Accessory
group_10830	0	0	Accessory
group_10831	1	6.66667	Accessory
group_10832	1	6.66667	Accessory
group_10833	0	0	Accessory
group_10834	0	0	Accessory
group_10835	1	6.66667	Accessory
group_10836	1	6.66667	Accessory
group_10837	0	0	Accessory
group_10838	0	0	Accessory
group_10839	0	0	Accessory
group_1084	0	0	Accessory
group_10840	1	6.66667	Accessory
group_10841	0	0	Accessory
group_10842	0	0	Accessory
group_10843	0	0	Accessory
group_10844	0	0	Accessory
group_10845	0	0	Accessory
group_10846	0	0	Accessory
group_10847	0	0	Accessory
group_10848	0	0	Accessory
group_10849	0	0	Accessory
group_1085	1	6.66667	Accessory
group_10850	0	0	Accessory
group_10851	0	0	Accessory
group_10852	0	0	Accessory
group_10853	1	6.66667	Accessory
group_10854	0	0	Accessory
group_10855	0	0	Accessory
group_10856	0	0	Accessory
group_10857	0	0	Accessory
group_10858	0	0	Accessory
group_10859	0	0	Accessory
group_1086	4	26.6667	Accessory
group_10860	0	0	Accessory
group_10861	0	0	Accessory
group_10862	0	0	Accessory
group_10863	0	0	Accessory
group_10864	0	0	Accessory
group_10865	1	6.66667	Accessory
group_10866	0	0	Accessory
group_10867	0	0	Accessory
group_10868	0	0	Accessory
group_10869	0	0	Accessory
group_1087	0	0	Accessory
group_10870	0	0	Accessory
group_10871	2	13.3333	Accessory
group_10872	1	6.66667	Accessory
group_10873	3	20	Accessory
group_10874	1	6.66667	Accessory
group_10875	0	0	Accessory
group_10876	0	0	Accessory
group_10877	1	6.66667	Accessory
group_10878	1	6.66667	Accessory
group_10879	0	0	Accessory
group_1088	0	0	Accessory
group_10880	0	0	Accessory
group_10881	0	0	Accessory
group_10882	0	0	Accessory
group_10883	0	0	Accessory
group_10884	2	13.3333	Accessory
group_10885	0	0	Accessory
group_10886	0	0	Accessory
group_10887	0	0	Accessory
group_10888	0	0	Accessory
group_10889	0	0	Accessory
group_1089	0	0	Accessory
group_10890	0	0	Accessory
group_10891	0	0	Accessory
group_10892	0	0	Accessory
group_10893	0	0	Accessory
group_10894	2	13.3333	Accessory
group_10895	0	0	Accessory
group_10896	0	0	Accessory
group_10897	0	0	Accessory
group_10898	0	0	Accessory
group_10899	0	0	Accessory
group_109	2	13.3333	Accessory
group_1090	0	0	Accessory
group_10900	0	0	Accessory
group_10901	0	0	Accessory
group_10902	0	0	Accessory
group_10903	0	0	Accessory
group_10904	0	0	Accessory
group_10905	0	0	Accessory
group_10906	0	0	Accessory
group_10907	0	0	Accessory
group_10908	0	0	Accessory
group_10909	0	0	Accessory
group_1091	0	0	Accessory
group_10910	4	26.6667	Accessory
group_10911	0	0	Accessory
group_10912	0	0	Accessory
group_10913	0	0	Accessory
group_10914	0	0	Accessory
group_10915	0	0	Accessory
group_10916	0	0	Accessory
group_10917	0	0	Accessory
group_10918	0	0	Accessory
group_10919	0	0	Accessory
group_1092	0	0	Accessory
group_10920	0	0	Accessory
group_10921	0	0	Accessory
group_10922	0	0	Accessory
group_10923	0	0	Accessory
group_10924	0	0	Accessory
group_10925	0	0	Accessory
group_10926	1	6.66667	Accessory
group_10927	0	0	Accessory
group_10928	0	0	Accessory
group_10929	0	0	Accessory
group_1093	0	0	Accessory
group_10930	0	0	Accessory
group_10931	0	0	Accessory
group_10932	0	0	Accessory
group_10933	0	0	Accessory
group_10934	1	6.66667	Accessory
group_10935	0	0	Accessory
group_10936	2	13.3333	Accessory
group_10937	0	0	Accessory
group_10938	0	0	Accessory
group_10939	0	0	Accessory
group_1094	0	0	Accessory
group_10940	0	0	Accessory
group_10941	0	0	Accessory
group_10942	0	0	Accessory
group_10943	0	0	Accessory
group_10944	0	0	Accessory
group_10945	0	0	Accessory
group_10946	0	0	Accessory
group_10947	1	6.66667	Accessory
group_10948	0	0	Accessory
group_10949	0	0	Accessory
group_1095	9	60	Accessory
group_10950	0	0	Accessory
group_10951	0	0	Accessory
group_10952	0	0	Accessory
group_10953	0	0	Accessory
group_10954	0	0	Accessory
group_10955	0	0	Accessory
group_10956	0	0	Accessory
group_10957	0	0	Accessory
group_10958	0	0	Accessory
group_10959	0	0	Accessory
group_1096	0	0	Accessory
group_10960	0	0	Accessory
group_10961	0	0	Accessory
group_10962	2	13.3333	Accessory
group_10963	0	0	Accessory
group_10964	0	0	Accessory
group_10965	0	0	Accessory
group_10966	0	0	Accessory
group_10967	0	0	Accessory
group_10968	0	0	Accessory
group_10969	0	0	Accessory
group_1097	4	26.6667	Accessory
group_10970	0	0	Accessory
group_10971	0	0	Accessory
group_10972	0	0	Accessory
group_10973	0	0	Accessory
group_10974	0	0	Accessory
group_10975	2	13.3333	Accessory
group_10976	2	13.3333	Accessory
group_10977	2	13.3333	Accessory
group_10978	0	0	Accessory
group_10979	0	0	Accessory
group_1098	1	6.66667	Accessory
group_10980	0	0	Accessory
group_10981	1	6.66667	Accessory
group_10982	4	26.6667	Accessory
group_10983	0	0	Accessory
group_10984	0	0	Accessory
group_10985	0	0	Accessory
group_10986	0	0	Accessory
group_10987	2	13.3333	Accessory
group_10988	0	0	Accessory
group_10989	1	6.66667	Accessory
group_1099	0	0	Accessory
group_10990	0	0	Accessory
group_10991	0	0	Accessory
group_10992	0	0	Accessory
group_10993	0	0	Accessory
group_10994	0	0	Accessory
group_10995	0	0	Accessory
group_10996	0	0	Accessory
group_10997	1	6.66667	Accessory
group_10998	0	0	Accessory
group_10999	0	0	Accessory
group_11	0	0	Accessory
group_110	0	0	Accessory
group_1100	0	0	Accessory
group_11000	0	0	Accessory
group_11001	0	0	Accessory
group_11002	0	0	Accessory
group_11003	0	0	Accessory
group_11004	0	0	Accessory
group_11005	0	0	Accessory
group_11006	0	0	Accessory
group_11007	0	0	Accessory
group_11008	1	6.66667	Accessory
group_11009	1	6.66667	Accessory
group_1101	0	0	Accessory
group_11010	0	0	Accessory
group_11011	0	0	Accessory
group_11012	0	0	Accessory
group_11013	0	0	Accessory
group_11014	0	0	Accessory
group_11015	0	0	Accessory
group_11016	0	0	Accessory
group_11017	0	0	Accessory
group_11018	0	0	Accessory
group_11019	1	6.66667	Accessory
group_1102	0	0	Accessory
group_11020	0	0	Accessory
group_11021	0	0	Accessory
group_11022	0	0	Accessory
group_11023	0	0	Accessory
group_11024	0	0	Accessory
group_11025	0	0	Accessory
group_11026	0	0	Accessory
group_11027	1	6.66667	Accessory
group_11028	0	0	Accessory
group_11029	0	0	Accessory
group_1103	2	13.3333	Accessory
group_11030	0	0	Accessory
group_11031	0	0	Accessory
group_11032	0	0	Accessory
group_11033	0	0	Accessory
group_11034	0	0	Accessory
group_11035	0	0	Accessory
group_11036	0	0	Accessory
group_11037	0	0	Accessory
group_11038	0	0	Accessory
group_11039	0	0	Accessory
group_1104	0	0	Accessory
group_11040	0	0	Accessory
group_11041	0	0	Accessory
group_11042	0	0	Accessory
group_11043	0	0	Accessory
group_11044	0	0	Accessory
group_11045	0	0	Accessory
group_11046	0	0	Accessory
group_11047	0	0	Accessory
group_11048	0	0	Accessory
group_11049	0	0	Accessory
group_1105	0	0	Accessory
group_11050	0	0	Accessory
group_11051	0	0	Accessory
group_11052	0	0	Accessory
group_11053	0	0	Accessory
group_11054	0	0	Accessory
group_11055	0	0	Accessory
group_11056	0	0	Accessory
group_11057	0	0	Accessory
group_11058	0	0	Accessory
group_11059	0	0	Accessory
group_1106	0	0	Accessory
group_11060	0	0	Accessory
group_11061	0	0	Accessory
group_11062	0	0	Accessory
group_11063	0	0	Accessory
group_11064	0	0	Accessory
group_11065	0	0	Accessory
group_11066	1	6.66667	Accessory
group_11067	0	0	Accessory
group_11068	1	6.66667	Accessory
group_11069	0	0	Accessory
group_1107	13	86.6667	Accessory
group_11070	0	0	Accessory
group_11071	0	0	Accessory
group_11072	0	0	Accessory
group_11073	0	0	Accessory
group_11074	0	0	Accessory
group_11075	0	0	Accessory
group_11076	0	0	Accessory
group_11077	0	0	Accessory
group_11078	0	0	Accessory
group_11079	1	6.66667	Accessory
group_1108	3	20	Accessory
group_11080	0	0	Accessory
group_11081	0	0	Accessory
group_11082	0	0	Accessory
group_11083	1	6.66667	Accessory
group_11084	2	13.3333	Accessory
group_11085	0	0	Accessory
group_11086	0	0	Accessory
group_11087	0	0	Accessory
group_11088	0	0	Accessory
group_11089	0	0	Accessory
group_1109	11	73.3333	Accessory
group_11090	0	0	Accessory
group_11091	0	0	Accessory
group_11092	0	0	Accessory
group_11093	0	0	Accessory
group_11094	0	0	Accessory
group_11095	0	0	Accessory
group_11096	1	6.66667	Accessory
group_11097	1	6.66667	Accessory
group_11098	0	0	Accessory
group_11099	0	0	Accessory
group_111	8	53.3333	Accessory
group_1110	0	0	Accessory
group_11100	0	0	Accessory
group_11101	0	0	Accessory
group_11102	0	0	Accessory
group_11103	0	0	Accessory
group_11104	0	0	Accessory
group_11105	0	0	Accessory
group_11106	0	0	Accessory
group_11107	0	0	Accessory
group_11108	0	0	Accessory
group_11109	0	0	Accessory
group_1111	0	0	Accessory
group_11110	0	0	Accessory
group_11111	0	0	Accessory
group_11112	0	0	Accessory
group_11113	0	0	Accessory
group_11114	0	0	Accessory
group_11115	0	0	Accessory
group_11116	0	0	Accessory
[truncated: 23,138 more rows]

## Sheet: Cluster 3
Supplementary Table 6: Core and accessory genes identified in Cluster 3
Gene	n_present	core_percentage	gene_type
aCT	17	100	Core
aF0785	1	5.88235	Accessory
aF2118	0	0	Accessory
aIM24	0	0	Accessory
aRA1	0	0	Accessory
aRO8	0	0	Accessory
aac6	0	0	Accessory
aarF	0	0	Accessory
abcX	0	0	Accessory
abcf	17	100	Core
abgB	0	0	Accessory
abiF	1	5.88235	Accessory
abiH	0	0	Accessory
abiV	0	0	Accessory
abpA	0	0	Accessory
abrB	0	0	Accessory
accA	17	100	Core
accB	17	100	Core
accC	1	5.88235	Accessory
accD	17	100	Core
aceF	17	100	Core
ackA	0	0	Accessory
acm	0	0	Accessory
acnA	0	0	Accessory
acoA	0	0	Accessory
acoA~~~pdhA	17	100	Core
acoB	17	100	Core
acpA	0	0	Accessory
acpA~~~acpB	0	0	Accessory
acpB	0	0	Accessory
acpP	17	100	Core
acpS	0	0	Accessory
acrA	0	0	Accessory
acrIIA6	0	0	Accessory
acrR	2	11.7647	Accessory
acrR~~~tetR	0	0	Accessory
acuB	0	0	Accessory
acuB~~~cBS	17	100	Core
acuI~~~yhfP	17	100	Core
acyP	0	0	Accessory
adaA	0	0	Accessory
adaB	0	0	Accessory
adcA	0	0	Accessory
adcC	0	0	Accessory
add	0	0	Accessory
addA	0	0	Accessory
adhE	0	0	Accessory
adhP	1	5.88235	Accessory
adk	17	100	Core
aes	0	0	Accessory
afuA	0	0	Accessory
afuC	0	0	Accessory
aga	0	0	Accessory
agaB	16	94.1176	Accessory
agaS	16	94.1176	Accessory
agrC	0	0	Accessory
aguA	0	0	Accessory
aguB	0	0	Accessory
ahpC	17	100	Core
ahpF	0	0	Accessory
alaS	0	0	Accessory
albA	0	0	Accessory
albE~~~pqqL	0	0	Accessory
albF	17	100	Core
albF~~~pqqL	0	0	Accessory
ald	17	100	Core
aliA	0	0	Accessory
aliA~~~sarA~~~oppA	17	100	Core
alkD	0	0	Accessory
alpA	5	29.4118	Accessory
alr	0	0	Accessory
alr~~~acpS	17	100	Core
alsS	0	0	Accessory
alsT	0	0	Accessory
alwI	1	5.88235	Accessory
amaP	2	11.7647	Accessory
amiA	17	100	Core
amiF~~~oppF	17	100	Core
ampC	0	0	Accessory
ampH	0	0	Accessory
ampH~~~ampC	0	0	Accessory
ampS~~~pepS	0	0	Accessory
amrA	1	5.88235	Accessory
amsE	0	0	Accessory
amt	0	0	Accessory
amtB	0	0	Accessory
amyA	17	100	Core
ansA	0	0	Accessory
ansP	0	0	Accessory
ant6	17	100	Core
apbE	0	0	Accessory
apeA	0	0	Accessory
aph3IIIa	0	0	Accessory
aprE	0	0	Accessory
apt	17	100	Core
araC	0	0	Accessory
araC~~~tetD	0	0	Accessory
araD	0	0	Accessory
araJ	0	0	Accessory
araQ	0	0	Accessory
araQ~~~ugpE	0	0	Accessory
arcA	17	100	Core
arcC	17	100	Core
arcR	17	100	Core
arcT	0	0	Accessory
ardA	2	11.7647	Accessory
argA~~~ywnH	0	0	Accessory
argB	0	0	Accessory
argC	0	0	Accessory
argD	0	0	Accessory
argE	17	100	Core
argF	17	100	Core
argG	0	0	Accessory
argH	0	0	Accessory
argJ	0	0	Accessory
argR	0	0	Accessory
argS	17	100	Core
arlR	0	0	Accessory
arlR~~~csrR~~~ompR	17	100	Core
aroA	4	23.5294	Accessory
aroB	0	0	Accessory
aroB~~~aroE	17	100	Core
aroC	17	100	Core
aroD	17	100	Core
aroE	0	0	Accessory
aroG1	17	100	Core
aroK	0	0	Accessory
arpU	0	0	Accessory
arsC	5	29.4118	Accessory
arsC~~~adaB	0	0	Accessory
arsR	0	0	Accessory
artM	0	0	Accessory
asbA	0	0	Accessory
ascB	0	0	Accessory
asd	17	100	Core
asnA	0	0	Accessory
asnS	17	100	Core
asp1	0	0	Accessory
asp2	0	0	Accessory
asp3	0	0	Accessory
asp4	0	0	Accessory
asp5	0	0	Accessory
aspB	17	100	Core
aspB~~~alaT	17	100	Core
aspS	0	0	Accessory
atoS	0	0	Accessory
atpA	17	100	Core
atpB	17	100	Core
atpC	17	100	Core
atpD	17	100	Core
atpE	0	0	Accessory
atpF	17	100	Core
atpG	17	100	Core
atpH	0	0	Accessory
avrD	0	0	Accessory
axe1	0	0	Accessory
azlC	17	100	Core
azlC~~~ygaZ	0	0	Accessory
azlD	17	100	Core
azlD2	0	0	Accessory
baeS	0	0	Accessory
bcc	0	0	Accessory
bceA	0	0	Accessory
bceB	0	0	Accessory
bceB~~~yxdM	17	100	Core
bcrC	0	0	Accessory
bcsA	0	0	Accessory
bcsZ	0	0	Accessory
beeE	1	5.88235	Accessory
bepR	1	5.88235	Accessory
bet	0	0	Accessory
betI~~~tetR	0	0	Accessory
bglB	16	94.1176	Accessory
bglB~~~gmuD~~~bglA	12	70.5882	Accessory
bglG	0	0	Accessory
bglG~~~licT	17	100	Core
bglH	17	100	Core
bgrS	0	0	Accessory
bhtF	0	0	Accessory
bigG	0	0	Accessory
bioF	0	0	Accessory
bioH	0	0	Accessory
bioY	0	0	Accessory
birA	0	0	Accessory
blaR1	0	0	Accessory
blpA	0	0	Accessory
blpC	0	0	Accessory
blpI	0	0	Accessory
blpJ	0	0	Accessory
blpL	0	0	Accessory
blpM	0	0	Accessory
blpO	0	0	Accessory
blpP	0	0	Accessory
blpR	0	0	Accessory
blpS~~~lytR~~~lytT	0	0	Accessory
blpT	0	0	Accessory
blpX	0	0	Accessory
blpY	0	0	Accessory
blpZ	0	0	Accessory
bofA	0	0	Accessory
briC	0	0	Accessory
brkB	0	0	Accessory
brkB~~~yihY	0	0	Accessory
brnQ	17	100	Core
brpA	0	0	Accessory
btuD	0	0	Accessory
btuE	0	0	Accessory
budA	17	100	Core
cDA1	0	0	Accessory
cadA	0	0	Accessory
cadD	1	5.88235	Accessory
cadX	0	0	Accessory
caiA	0	0	Accessory
caiD~~~fabM	17	100	Core
capA	0	0	Accessory
capD	0	0	Accessory
carA	17	100	Core
carB	0	0	Accessory
cas1	0	0	Accessory
cas10	0	0	Accessory
cas1c	2	11.7647	Accessory
cas2	0	0	Accessory
cas3	2	11.7647	Accessory
cas4	2	11.7647	Accessory
cas5c	2	11.7647	Accessory
cas6	0	0	Accessory
cas7c	2	11.7647	Accessory
cas8c	2	11.7647	Accessory
cas9	0	0	Accessory
catE	0	0	Accessory
cbbX	0	0	Accessory
cbiA	0	0	Accessory
cbiB	0	0	Accessory
cbiC	0	0	Accessory
cbiD	0	0	Accessory
cbiE	0	0	Accessory
cbiF	0	0	Accessory
cbiG	0	0	Accessory
cbiM	0	0	Accessory
cbiN	0	0	Accessory
cbiO	0	0	Accessory
cbiQ	0	0	Accessory
cbiT	0	0	Accessory
cbpB	17	100	Core
cbpC	0	0	Accessory
cbpD	0	0	Accessory
cbpD2	0	0	Accessory
cbpE	0	0	Accessory
cbpF~~~cbpJ	0	0	Accessory
cbpI	0	0	Accessory
cbrC	0	0	Accessory
cca	0	0	Accessory
ccc1	0	0	Accessory
ccdA	0	0	Accessory
ccdA2	0	0	Accessory
ccdA2~~~ccdA	17	100	Core
ccmA	0	0	Accessory
ccmD	17	100	Core
ccmE	0	0	Accessory
ccmK	0	0	Accessory
ccoS	0	0	Accessory
ccpA	0	0	Accessory
ccpA~~~lacI	17	100	Core
ccpN	17	100	Core
ccrZ	0	0	Accessory
cdaA	17	100	Core
cdaR~~~ybbR	0	0	Accessory
cdd	17	100	Core
cdiI	0	0	Accessory
cdsA	0	0	Accessory
celA	0	0	Accessory
celA~~~comEA	0	0	Accessory
celB	17	100	Core
celB~~~comEC	0	0	Accessory
celC	0	0	Accessory
celC~~~bigG	10	58.8235	Accessory
ceuA	0	0	Accessory
ceuB	0	0	Accessory
ceuC	0	0	Accessory
ceuD	0	0	Accessory
chaP	0	0	Accessory
ciaH~~~baeS	17	100	Core
ciaR	0	0	Accessory
cibA	0	0	Accessory
cibB	0	0	Accessory
cinA	17	100	Core
citA	0	0	Accessory
citB	0	0	Accessory
citB~~~luxR~~~degU	17	100	Core
citC	0	0	Accessory
citD	0	0	Accessory
citE	0	0	Accessory
citF	0	0	Accessory
citG	0	0	Accessory
citM	0	0	Accessory
citS	0	0	Accessory
citS~~~yesM	0	0	Accessory
citX	0	0	Accessory
citZ	0	0	Accessory
clcA	17	100	Core
clcB	0	0	Accessory
clpA	0	0	Accessory
clpA~~~clpC	17	100	Core
clpA~~~clpE	0	0	Accessory
clpB	0	0	Accessory
clpC	3	17.6471	Accessory
clpC1	0	0	Accessory
clpE	0	0	Accessory
clpL	17	100	Core
clpL~~~clpA	0	0	Accessory
clpP	17	100	Core
clpX	17	100	Core
cls	17	100	Core
cmk	17	100	Core
cmr4	0	0	Accessory
coaA	17	100	Core
coaB	17	100	Core
coaC	17	100	Core
coaD	0	0	Accessory
coaE	17	100	Core
cobA	0	0	Accessory
cobB	0	0	Accessory
cobD	0	0	Accessory
cobI	0	0	Accessory
cobJ	0	0	Accessory
cobK	0	0	Accessory
cobN	0	0	Accessory
cobQ	0	0	Accessory
cobQ~~~gatD	17	100	Core
cobS	0	0	Accessory
cobT	0	0	Accessory
cobU	0	0	Accessory
codY	17	100	Core
cof	0	0	Accessory
cofD	0	0	Accessory
cof~~~ybjI	17	100	Core
coiA	0	0	Accessory
coiA~~~prsA	0	0	Accessory
comA	0	0	Accessory
comA~~~pncF	0	0	Accessory
comB	0	0	Accessory
comC	0	0	Accessory
comD	0	0	Accessory
comD~~~natK	0	0	Accessory
comD~~~yesM~~~dcuS	0	0	Accessory
comE	0	0	Accessory
comEA	0	0	Accessory
comEB	0	0	Accessory
comEC	0	0	Accessory
comE~~~comEB	0	0	Accessory
comF	0	0	Accessory
comFA	0	0	Accessory
comFA~~~comF	0	0	Accessory
comFC	0	0	Accessory
comF~~~comFC	0	0	Accessory
comF~~~recG~~~comFA	17	100	Core
comGA	0	0	Accessory
comGA~~~comGB	0	0	Accessory
comGB	0	0	Accessory
comGC	0	0	Accessory
comGD	0	0	Accessory
comGE	0	0	Accessory
comGF	0	0	Accessory
comGF~~~comGG	0	0	Accessory
comGG	0	0	Accessory
comM	0	0	Accessory
comP	0	0	Accessory
comR	0	0	Accessory
comR1	0	0	Accessory
comW	6	35.2941	Accessory
comX	0	0	Accessory
comX1	0	0	Accessory
comX1~~~comX	14	82.3529	Accessory
comX2	0	0	Accessory
comX2~~~comX1	0	0	Accessory
copG	0	0	Accessory
copY	0	0	Accessory
copZ	0	0	Accessory
corA	17	100	Core
cotH	2	11.7647	Accessory
cotS	0	0	Accessory
cotS~~~licA	0	0	Accessory
cpdA	0	0	Accessory
cpdB	0	0	Accessory
cpoA	0	0	Accessory
cppA	0	0	Accessory
cps2a	0	0	Accessory
cps4B	0	0	Accessory
cpsC	0	0	Accessory
cpsD	0	0	Accessory
cpsD~~~mrp	15	88.2353	Accessory
cpsE~~~wcaJ~~~epsL	15	88.2353	Accessory
cpsI	0	0	Accessory
cpsJ	0	0	Accessory
cpsL	9	52.9412	Accessory
cpsO~~~epsJ	0	0	Accessory
crcB	0	0	Accessory
crcB~~~fluC	0	0	Accessory
crp	0	0	Accessory
csbD	0	0	Accessory
cshA	0	0	Accessory
cshA~~~srmB	17	100	Core
cshA~~~srmB~~~yfmL	17	100	Core
cshB	0	0	Accessory
cshB~~~srmB	0	0	Accessory
csm2	0	0	Accessory
csm3	0	0	Accessory
csm4	0	0	Accessory
csm5	0	0	Accessory
csm6	0	0	Accessory
csn2	0	0	Accessory
csoR	17	100	Core
ctpA	0	0	Accessory
ctsR	17	100	Core
cutC	0	0	Accessory
cutD	0	0	Accessory
cvfB	17	100	Core
cvpA	0	0	Accessory
cwlA	0	0	Accessory
cwlO	17	100	Core
cydC	0	0	Accessory
cydD	0	0	Accessory
cylB	0	0	Accessory
cynT	0	0	Accessory
cynX	0	0	Accessory
cysA	0	0	Accessory
cysB	16	94.1176	Accessory
cysE	0	0	Accessory
cysE~~~epsC~~~rimI	17	100	Core
cysK	17	100	Core
cysS	17	100	Core
czcD	0	0	Accessory
dAP2	0	0	Accessory
dLH	0	0	Accessory
dacC	0	0	Accessory
dadA	0	0	Accessory
dam	0	0	Accessory
dapA	13	76.4706	Accessory
dapB	0	0	Accessory
dapD	13	76.4706	Accessory
darT	0	0	Accessory
dcm	0	0	Accessory
ddl	0	0	Accessory
dedA	0	0	Accessory
def	17	100	Core
degA	0	0	Accessory
degP	0	0	Accessory
degV	0	0	Accessory
degV~~~trmH	17	100	Core
deoB	0	0	Accessory
deoC	17	100	Core
deoD	17	100	Core
deoR	0	0	Accessory
deoR~~~glpR	0	0	Accessory
deoR~~~ulaR~~~glpR	0	0	Accessory
der	0	0	Accessory
dexB	5	29.4118	Accessory
dgkA	17	100	Core
dhaK	16	94.1176	Accessory
dhaK~~~dhaQ	0	0	Accessory
dhaL	16	94.1176	Accessory
dhaM	0	0	Accessory
dhaQ	0	0	Accessory
dhaS	0	0	Accessory
dhfR	0	0	Accessory
dicA	0	0	Accessory
dinB	17	100	Core
dinD	1	5.88235	Accessory
dinF	0	0	Accessory
dinG	0	0	Accessory
divIB	0	0	Accessory
divIVA	17	100	Core
dltA	0	0	Accessory
dltB	0	0	Accessory
dltC	0	0	Accessory
dltD	0	0	Accessory
dltR	0	0	Accessory
dnaA	0	0	Accessory
dnaB	0	0	Accessory
dnaB~~~dnaD	0	0	Accessory
dnaC	4	23.5294	Accessory
dnaD	17	100	Core
dnaE	0	0	Accessory
dnaG	0	0	Accessory
dnaI	17	100	Core
dnaJ	0	0	Accessory
dnaK	17	100	Core
dnaN	0	0	Accessory
dnaQ	0	0	Accessory
dnaQ~~~dinG~~~polC	0	0	Accessory
dnaQ~~~polC	0	0	Accessory
dnaX	17	100	Core
doc	0	0	Accessory
dpiB	0	0	Accessory
dpnA	0	0	Accessory
dpnD	0	0	Accessory
dpnI	17	100	Core
dpnM	0	0	Accessory
dppB	0	0	Accessory
dppC	0	0	Accessory
dppD	0	0	Accessory
dprA	17	100	Core
dps	0	0	Accessory
draG	0	0	Accessory
drrA	2	11.7647	Accessory
drrB	0	0	Accessory
dsbD	0	0	Accessory
dtd	17	100	Core
dusB	17	100	Core
dut	17	100	Core
eCFS	17	100	Core
eMAP	0	0	Accessory
eRG12	0	0	Accessory
eamA	0	0	Accessory
eamA~~~rhaT	0	0	Accessory
eamA~~~yicL	17	100	Core
ebgC	0	0	Accessory
ebhA	4	23.5294	Accessory
ebsA	17	100	Core
ebsC	17	100	Core
ecfA1	17	100	Core
ecfA2	17	100	Core
ecfT	17	100	Core
ecfT~~~mtsC~~~cbiQ	17	100	Core
ecsA~~~ccmA	0	0	Accessory
ecsB	0	0	Accessory
ecsC	1	5.88235	Accessory
eda	5	29.4118	Accessory
efeB	0	0	Accessory
efeO	0	0	Accessory
efeU	0	0	Accessory
efiE	0	0	Accessory
efp	17	100	Core
egtUA	0	0	Accessory
egtUBC	0	0	Accessory
ehuA	0	0	Accessory
elaA	0	0	Accessory
elaC	0	0	Accessory
elsH	0	0	Accessory
elyC	0	0	Accessory
endA	17	100	Core
engA	0	0	Accessory
eno	0	0	Accessory
entS	8	47.0588	Accessory
epsA	0	0	Accessory
epsB	0	0	Accessory
epsE	0	0	Accessory
epsF	0	0	Accessory
epsG	0	0	Accessory
epsH	0	0	Accessory
epsJ	0	0	Accessory
epsJ~~~wcaA	0	0	Accessory
epsL	0	0	Accessory
epsN	0	0	Accessory
epsV	0	0	Accessory
epuA	0	0	Accessory
era	17	100	Core
eriC	0	0	Accessory
ermB	2	11.7647	Accessory
ermL~~~ermC	2	11.7647	Accessory
esaA	0	0	Accessory
esaC	0	0	Accessory
escB	0	0	Accessory
essA	1	5.88235	Accessory
essB	0	0	Accessory
essC	0	0	Accessory
essC~~~ftsK	0	0	Accessory
esxA	1	5.88235	Accessory
eutA	0	0	Accessory
eutC	0	0	Accessory
eutD	0	0	Accessory
eutH	0	0	Accessory
eutJ	0	0	Accessory
eutL	0	0	Accessory
eutM	0	0	Accessory
eutN	0	0	Accessory
eutP	0	0	Accessory
eutQ	0	0	Accessory
exoY~~~wcaJ	0	0	Accessory
exp7~~~mgtA	17	100	Core
exp8	0	0	Accessory
ezrA	17	100	Core
fAU1	0	0	Accessory
fIDO	0	0	Accessory
fMR2	0	0	Accessory
fabD	0	0	Accessory
fabF	17	100	Core
fabG	17	100	Core
fabH	17	100	Core
fabK	17	100	Core
fabM	0	0	Accessory
fabZ	17	100	Core
fabZ~~~fatA	0	0	Accessory
fabZ~~~paaI	0	0	Accessory
fabZ~~~spxR	0	0	Accessory
fadH2	0	0	Accessory
fadM	0	0	Accessory
fasA	0	0	Accessory
fatA	0	0	Accessory
fba	17	100	Core
fbp	17	100	Core
fbpA	0	0	Accessory
fbpB	0	0	Accessory
fctA	0	0	Accessory
femA	0	0	Accessory
femA~~~murN	17	100	Core
femB~~~fmhB	0	0	Accessory
feoA	0	0	Accessory
feoB	0	0	Accessory
fer	9	52.9412	Accessory
ffh	17	100	Core
fghA	0	0	Accessory
fhs	0	0	Accessory
fhs1	0	0	Accessory
fhs~~~fhs2	17	100	Core
fibA	0	0	Accessory
fieF	0	0	Accessory
fieF~~~mntE	0	0	Accessory
fimA	0	0	Accessory
fimB	2	11.7647	Accessory
fimC	0	0	Accessory
flaA1	0	0	Accessory
fldA	17	100	Core
flgJ	0	0	Accessory
flgM	0	0	Accessory
fliA	0	0	Accessory
fliJ	0	0	Accessory
fliK	0	0	Accessory
fliS	0	0	Accessory
fmhB	0	0	Accessory
fmnP	17	100	Core
fmt	17	100	Core
fmtA	0	0	Accessory
fni	0	0	Accessory
focA	4	23.5294	Accessory
folA	0	0	Accessory
folB	0	0	Accessory
folC	17	100	Core
folD	0	0	Accessory
folE	0	0	Accessory
folK	0	0	Accessory
folK~~~folB	0	0	Accessory
folP	0	0	Accessory
folT	0	0	Accessory
frmA	0	0	Accessory
frmB	0	0	Accessory
frr	17	100	Core
fruA	0	0	Accessory
fruA~~~luxR	0	0	Accessory
frvX	0	0	Accessory
fsa	0	0	Accessory
fszA	0	0	Accessory
ftcD	0	0	Accessory
ftf	0	0	Accessory
ftsA	0	0	Accessory
ftsB	0	0	Accessory
ftsE	0	0	Accessory
ftsH	0	0	Accessory
ftsJ	17	100	Core
ftsK	4	23.5294	Accessory
ftsL	0	0	Accessory
ftsQ	0	0	Accessory
ftsW	0	0	Accessory
ftsX	0	0	Accessory
ftsY	17	100	Core
ftsZ	0	0	Accessory
ftsZ~~~murF	0	0	Accessory
fucI	0	0	Accessory
fucO	0	0	Accessory
fucO~~~gldA	12	70.5882	Accessory
funZ	0	0	Accessory
fur	0	0	Accessory
fusA	0	0	Accessory
galA	0	0	Accessory
galE	17	100	Core
galK	0	0	Accessory
galM	17	100	Core
galR	0	0	Accessory
galT	0	0	Accessory
galT2~~~galT	0	0	Accessory
galU	17	100	Core
ganA	17	100	Core
gap	0	0	Accessory
gapN	0	0	Accessory
gatA	17	100	Core
gatB	17	100	Core
gatC	17	100	Core
gbpC	0	0	Accessory
gdhA	17	100	Core
gdmH	0	0	Accessory
gdpP	17	100	Core
gldA	0	0	Accessory
glf	0	0	Accessory
glgA	17	100	Core
glgB	17	100	Core
glgC	17	100	Core
glgD	17	100	Core
glgP	17	100	Core
glmM	17	100	Core
glmS	0	0	Accessory
glmU	17	100	Core
glnA	0	0	Accessory
glnH	0	0	Accessory
glnK	0	0	Accessory
glnQ	0	0	Accessory
glnQ~~~artM	17	100	Core
glnQ~~~yxeN	0	0	Accessory
glnR	17	100	Core
glnR~~~merR	0	0	Accessory
gloA	5	29.4118	Accessory
gloB	17	100	Core
gloB~~~yqgX	0	0	Accessory
glpE	17	100	Core
glpE~~~moeZ~~~pspE	0	0	Accessory
glpF	0	0	Accessory
glpG	0	0	Accessory
glpK	17	100	Core
glpO	0	0	Accessory
glpR	0	0	Accessory
gltA	0	0	Accessory
gltB	0	0	Accessory
gltC	0	0	Accessory
gltD	0	0	Accessory
gltX	17	100	Core
gluP	0	0	Accessory
glvR	7	41.1765	Accessory
glxK	0	0	Accessory
gly	0	0	Accessory
glyA	17	100	Core
glyE	0	0	Accessory
glyG	0	0	Accessory
glyP~~~alsT	0	0	Accessory
glyQ	17	100	Core
glyS	0	0	Accessory
gmk	17	100	Core
gmuD	0	0	Accessory
gndA	17	100	Core
gntR	2	11.7647	Accessory
gntR~~~aRO8	0	0	Accessory
gntR~~~ubiC	17	100	Core
gntR~~~ytrA~~~yhcF	17	100	Core
gntR~~~yvoA~~~mngR	17	100	Core
gntX	2	11.7647	Accessory
gor	0	0	Accessory
gorA	0	0	Accessory
gph	0	0	Accessory
gpmA	17	100	Core
gpmB2	15	88.2353	Accessory
gpsA	17	100	Core
gpsB	0	0	Accessory
greA	0	0	Accessory
groES	0	0	Accessory
groL	0	0	Accessory
group_0	0	0	Accessory
group_1	0	0	Accessory
group_10	0	0	Accessory
group_100	0	0	Accessory
group_1000	0	0	Accessory
group_10000	1	5.88235	Accessory
group_10001	1	5.88235	Accessory
group_10002	0	0	Accessory
group_10003	0	0	Accessory
group_10004	0	0	Accessory
group_10005	0	0	Accessory
group_10006	0	0	Accessory
group_10007	0	0	Accessory
group_10008	0	0	Accessory
group_10009	0	0	Accessory
group_1001	0	0	Accessory
group_10010	0	0	Accessory
group_10011	0	0	Accessory
group_10012	0	0	Accessory
group_10013	0	0	Accessory
group_10014	0	0	Accessory
group_10015	0	0	Accessory
group_10016	0	0	Accessory
group_10017	0	0	Accessory
group_10018	3	17.6471	Accessory
group_10019	0	0	Accessory
group_1002	3	17.6471	Accessory
group_10020	0	0	Accessory
group_10021	0	0	Accessory
group_10022	0	0	Accessory
group_10023	0	0	Accessory
group_10024	0	0	Accessory
group_10025	0	0	Accessory
group_10026	0	0	Accessory
group_10027	0	0	Accessory
group_10028	0	0	Accessory
group_10029	0	0	Accessory
group_1003	0	0	Accessory
group_10030	0	0	Accessory
group_10031	1	5.88235	Accessory
group_10032	1	5.88235	Accessory
group_10033	0	0	Accessory
group_10034	0	0	Accessory
group_10035	0	0	Accessory
group_10036	0	0	Accessory
group_10037	0	0	Accessory
group_10038	0	0	Accessory
group_10039	0	0	Accessory
group_1004	0	0	Accessory
group_10040	0	0	Accessory
group_10041	0	0	Accessory
group_10042	0	0	Accessory
group_10043	0	0	Accessory
group_10044	0	0	Accessory
group_10045	0	0	Accessory
group_10046	0	0	Accessory
group_10047	0	0	Accessory
group_10048	0	0	Accessory
group_10049	0	0	Accessory
group_1005	0	0	Accessory
group_10050	0	0	Accessory
group_10051	0	0	Accessory
group_10052	0	0	Accessory
group_10053	0	0	Accessory
group_10054	0	0	Accessory
group_10055	0	0	Accessory
group_10056	0	0	Accessory
group_10057	0	0	Accessory
group_10058	1	5.88235	Accessory
group_10059	1	5.88235	Accessory
group_1006	0	0	Accessory
group_10060	0	0	Accessory
group_10061	4	23.5294	Accessory
group_10062	0	0	Accessory
group_10063	0	0	Accessory
group_10064	0	0	Accessory
group_10065	0	0	Accessory
group_10066	0	0	Accessory
group_10067	0	0	Accessory
group_10068	1	5.88235	Accessory
group_10069	1	5.88235	Accessory
group_1007	0	0	Accessory
group_10070	0	0	Accessory
group_10071	0	0	Accessory
group_10072	0	0	Accessory
group_10073	0	0	Accessory
group_10074	0	0	Accessory
group_10075	0	0	Accessory
group_10076	0	0	Accessory
group_10077	0	0	Accessory
group_10078	0	0	Accessory
group_10079	0	0	Accessory
group_1008	0	0	Accessory
group_10080	0	0	Accessory
group_10081	0	0	Accessory
group_10082	0	0	Accessory
group_10083	0	0	Accessory
group_10084	0	0	Accessory
group_10085	0	0	Accessory
group_10086	0	0	Accessory
group_10087	0	0	Accessory
group_10088	0	0	Accessory
group_10089	0	0	Accessory
group_1009	17	100	Core
group_10090	1	5.88235	Accessory
group_10091	1	5.88235	Accessory
group_10092	0	0	Accessory
group_10093	0	0	Accessory
group_10094	0	0	Accessory
group_10095	0	0	Accessory
group_10096	0	0	Accessory
group_10097	0	0	Accessory
group_10098	0	0	Accessory
group_10099	0	0	Accessory
group_101	0	0	Accessory
group_1010	0	0	Accessory
group_10100	2	11.7647	Accessory
group_10101	0	0	Accessory
group_10102	0	0	Accessory
group_10103	1	5.88235	Accessory
group_10104	1	5.88235	Accessory
group_10105	0	0	Accessory
group_10106	0	0	Accessory
group_10107	0	0	Accessory
group_10108	0	0	Accessory
group_10109	0	0	Accessory
group_1011	0	0	Accessory
group_10110	0	0	Accessory
group_10111	0	0	Accessory
group_10112	0	0	Accessory
group_10113	0	0	Accessory
group_10114	0	0	Accessory
group_10115	0	0	Accessory
group_10116	0	0	Accessory
group_10117	0	0	Accessory
group_10118	0	0	Accessory
group_10119	0	0	Accessory
group_1012	0	0	Accessory
group_10120	0	0	Accessory
group_10121	0	0	Accessory
group_10122	0	0	Accessory
group_10123	0	0	Accessory
group_10124	0	0	Accessory
group_10125	0	0	Accessory
group_10126	0	0	Accessory
group_10127	0	0	Accessory
group_10128	0	0	Accessory
group_10129	0	0	Accessory
group_1013	0	0	Accessory
group_10130	0	0	Accessory
group_10131	0	0	Accessory
group_10132	0	0	Accessory
group_10133	1	5.88235	Accessory
group_10134	0	0	Accessory
group_10135	0	0	Accessory
group_10136	0	0	Accessory
group_10137	0	0	Accessory
group_10138	0	0	Accessory
group_10139	1	5.88235	Accessory
group_1014	0	0	Accessory
group_10140	0	0	Accessory
group_10141	0	0	Accessory
group_10142	0	0	Accessory
group_10143	0	0	Accessory
group_10144	0	0	Accessory
group_10145	0	0	Accessory
group_10146	0	0	Accessory
group_10147	0	0	Accessory
group_10148	0	0	Accessory
group_10149	0	0	Accessory
group_1015	9	52.9412	Accessory
group_10150	0	0	Accessory
group_10151	0	0	Accessory
group_10152	0	0	Accessory
group_10153	0	0	Accessory
group_10154	3	17.6471	Accessory
group_10155	1	5.88235	Accessory
group_10156	1	5.88235	Accessory
group_10157	2	11.7647	Accessory
group_10158	0	0	Accessory
group_10159	0	0	Accessory
group_1016	9	52.9412	Accessory
group_10160	0	0	Accessory
group_10161	0	0	Accessory
group_10162	0	0	Accessory
group_10163	0	0	Accessory
group_10164	0	0	Accessory
group_10165	1	5.88235	Accessory
group_10166	1	5.88235	Accessory
group_10167	0	0	Accessory
group_10168	0	0	Accessory
group_10169	0	0	Accessory
group_1017	0	0	Accessory
group_10170	0	0	Accessory
group_10171	0	0	Accessory
group_10172	0	0	Accessory
group_10173	0	0	Accessory
group_10174	0	0	Accessory
group_10175	0	0	Accessory
group_10176	0	0	Accessory
group_10177	0	0	Accessory
group_10178	0	0	Accessory
group_10179	0	0	Accessory
group_1018	0	0	Accessory
group_10180	0	0	Accessory
group_10181	0	0	Accessory
group_10182	0	0	Accessory
group_10183	0	0	Accessory
group_10184	0	0	Accessory
group_10185	0	0	Accessory
group_10186	0	0	Accessory
group_10187	0	0	Accessory
group_10188	2	11.7647	Accessory
group_10189	0	0	Accessory
group_1019	0	0	Accessory
group_10190	0	0	Accessory
group_10191	0	0	Accessory
group_10192	0	0	Accessory
group_10193	0	0	Accessory
group_10194	0	0	Accessory
group_10195	0	0	Accessory
group_10196	0	0	Accessory
group_10197	0	0	Accessory
group_10198	1	5.88235	Accessory
group_10199	1	5.88235	Accessory
group_102	0	0	Accessory
group_1020	0	0	Accessory
group_10200	0	0	Accessory
group_10201	0	0	Accessory
group_10202	0	0	Accessory
group_10203	0	0	Accessory
group_10204	0	0	Accessory
group_10205	0	0	Accessory
group_10206	0	0	Accessory
group_10207	0	0	Accessory
group_10208	0	0	Accessory
group_10209	0	0	Accessory
group_1021	0	0	Accessory
group_10210	0	0	Accessory
group_10211	0	0	Accessory
group_10212	0	0	Accessory
group_10213	0	0	Accessory
group_10214	0	0	Accessory
group_10215	0	0	Accessory
group_10216	0	0	Accessory
group_10217	0	0	Accessory
group_10218	0	0	Accessory
group_10219	0	0	Accessory
group_1022	0	0	Accessory
group_10220	0	0	Accessory
group_10221	0	0	Accessory
group_10222	0	0	Accessory
group_10223	0	0	Accessory
group_10224	0	0	Accessory
group_10225	0	0	Accessory
group_10226	0	0	Accessory
group_10227	0	0	Accessory
group_10228	0	0	Accessory
group_10229	1	5.88235	Accessory
group_1023	0	0	Accessory
group_10230	0	0	Accessory
group_10231	0	0	Accessory
group_10232	0	0	Accessory
group_10233	0	0	Accessory
group_10234	0	0	Accessory
group_10235	0	0	Accessory
group_10236	0	0	Accessory
group_10237	0	0	Accessory
group_10238	2	11.7647	Accessory
group_10239	0	0	Accessory
group_1024	7	41.1765	Accessory
group_10240	0	0	Accessory
group_10241	0	0	Accessory
group_10242	0	0	Accessory
group_10243	0	0	Accessory
group_10244	0	0	Accessory
group_10245	0	0	Accessory
group_10246	0	0	Accessory
group_10247	0	0	Accessory
group_10248	0	0	Accessory
group_10249	0	0	Accessory
group_1025	16	94.1176	Accessory
group_10250	0	0	Accessory
group_10251	0	0	Accessory
group_10252	0	0	Accessory
group_10253	0	0	Accessory
group_10254	0	0	Accessory
group_10255	0	0	Accessory
group_10256	0	0	Accessory
group_10257	0	0	Accessory
group_10258	0	0	Accessory
group_10259	0	0	Accessory
group_1026	4	23.5294	Accessory
group_10260	0	0	Accessory
group_10261	0	0	Accessory
group_10262	0	0	Accessory
group_10263	0	0	Accessory
group_10264	0	0	Accessory
group_10265	0	0	Accessory
group_10266	0	0	Accessory
group_10267	0	0	Accessory
group_10268	0	0	Accessory
group_10269	0	0	Accessory
group_1027	17	100	Core
group_10270	0	0	Accessory
group_10271	0	0	Accessory
group_10272	0	0	Accessory
group_10273	3	17.6471	Accessory
group_10274	0	0	Accessory
group_10275	0	0	Accessory
group_10276	0	0	Accessory
group_10277	0	0	Accessory
group_10278	0	0	Accessory
group_10279	1	5.88235	Accessory
group_1028	4	23.5294	Accessory
group_10280	0	0	Accessory
group_10281	0	0	Accessory
group_10282	0	0	Accessory
group_10283	0	0	Accessory
group_10284	0	0	Accessory
group_10285	0	0	Accessory
group_10286	0	0	Accessory
group_10287	0	0	Accessory
group_10288	0	0	Accessory
group_10289	0	0	Accessory
group_1029	0	0	Accessory
group_10290	0	0	Accessory
group_10291	0	0	Accessory
group_10292	0	0	Accessory
group_10293	0	0	Accessory
group_10294	2	11.7647	Accessory
group_10295	0	0	Accessory
group_10296	0	0	Accessory
group_10297	0	0	Accessory
group_10298	0	0	Accessory
group_10299	0	0	Accessory
group_103	0	0	Accessory
group_1030	0	0	Accessory
group_10300	0	0	Accessory
group_10301	0	0	Accessory
group_10302	0	0	Accessory
group_10303	0	0	Accessory
group_10304	0	0	Accessory
group_10305	0	0	Accessory
group_10306	0	0	Accessory
group_10307	0	0	Accessory
group_10308	0	0	Accessory
group_10309	0	0	Accessory
group_1031	17	100	Core
group_10310	0	0	Accessory
group_10311	0	0	Accessory
group_10312	0	0	Accessory
group_10313	0	0	Accessory
group_10314	0	0	Accessory
group_10315	0	0	Accessory
group_10316	0	0	Accessory
group_10317	0	0	Accessory
group_10318	0	0	Accessory
group_10319	0	0	Accessory
group_1032	0	0	Accessory
group_10320	0	0	Accessory
group_10321	0	0	Accessory
group_10322	0	0	Accessory
group_10323	0	0	Accessory
group_10324	0	0	Accessory
group_10325	0	0	Accessory
group_10326	0	0	Accessory
group_10327	0	0	Accessory
group_10328	0	0	Accessory
group_10329	0	0	Accessory
group_1033	0	0	Accessory
group_10330	0	0	Accessory
group_10331	0	0	Accessory
group_10332	0	0	Accessory
group_10333	0	0	Accessory
group_10334	0	0	Accessory
group_10335	0	0	Accessory
group_10336	0	0	Accessory
group_10337	0	0	Accessory
group_10338	0	0	Accessory
group_10339	0	0	Accessory
group_1034	0	0	Accessory
group_10340	1	5.88235	Accessory
group_10341	2	11.7647	Accessory
group_10342	0	0	Accessory
group_10343	0	0	Accessory
group_10344	0	0	Accessory
group_10345	0	0	Accessory
group_10346	0	0	Accessory
group_10347	0	0	Accessory
group_10348	0	0	Accessory
group_10349	0	0	Accessory
group_1035	0	0	Accessory
group_10350	0	0	Accessory
group_10351	0	0	Accessory
group_10352	0	0	Accessory
group_10353	0	0	Accessory
group_10354	0	0	Accessory
group_10355	0	0	Accessory
group_10356	0	0	Accessory
group_10357	0	0	Accessory
group_10358	0	0	Accessory
group_10359	0	0	Accessory
group_1036	7	41.1765	Accessory
group_10360	0	0	Accessory
group_10361	0	0	Accessory
group_10362	0	0	Accessory
group_10363	0	0	Accessory
group_10364	0	0	Accessory
group_10365	0	0	Accessory
group_10366	0	0	Accessory
group_10367	0	0	Accessory
group_10368	0	0	Accessory
group_10369	0	0	Accessory
group_1037	0	0	Accessory
group_10370	0	0	Accessory
group_10371	0	0	Accessory
group_10372	2	11.7647	Accessory
group_10373	1	5.88235	Accessory
group_10374	1	5.88235	Accessory
group_10375	0	0	Accessory
group_10376	0	0	Accessory
group_10377	0	0	Accessory
group_10378	0	0	Accessory
group_10379	0	0	Accessory
group_1038	0	0	Accessory
group_10380	0	0	Accessory
group_10381	0	0	Accessory
group_10382	0	0	Accessory
group_10383	0	0	Accessory
group_10384	0	0	Accessory
group_10385	0	0	Accessory
group_10386	0	0	Accessory
group_10387	0	0	Accessory
group_10388	0	0	Accessory
group_10389	0	0	Accessory
group_1039	0	0	Accessory
group_10390	0	0	Accessory
group_10391	0	0	Accessory
group_10392	0	0	Accessory
group_10393	0	0	Accessory
group_10394	0	0	Accessory
group_10395	0	0	Accessory
group_10396	0	0	Accessory
group_10397	1	5.88235	Accessory
group_10398	0	0	Accessory
group_10399	0	0	Accessory
group_104	0	0	Accessory
group_1040	0	0	Accessory
group_10400	0	0	Accessory
group_10401	0	0	Accessory
group_10402	0	0	Accessory
group_10403	0	0	Accessory
group_10404	0	0	Accessory
group_10405	0	0	Accessory
group_10406	0	0	Accessory
group_10407	1	5.88235	Accessory
group_10408	1	5.88235	Accessory
group_10409	0	0	Accessory
group_1041	0	0	Accessory
group_10410	1	5.88235	Accessory
group_10411	0	0	Accessory
group_10412	0	0	Accessory
group_10413	0	0	Accessory
group_10414	0	0	Accessory
group_10415	0	0	Accessory
group_10416	0	0	Accessory
group_10417	0	0	Accessory
group_10418	0	0	Accessory
group_10419	0	0	Accessory
group_1042	0	0	Accessory
group_10420	0	0	Accessory
group_10421	0	0	Accessory
group_10422	0	0	Accessory
group_10423	0	0	Accessory
group_10424	0	0	Accessory
group_10425	0	0	Accessory
group_10426	0	0	Accessory
group_10427	0	0	Accessory
group_10428	0	0	Accessory
group_10429	0	0	Accessory
group_1043	1	5.88235	Accessory
group_10430	0	0	Accessory
group_10431	0	0	Accessory
group_10432	0	0	Accessory
group_10433	0	0	Accessory
group_10434	0	0	Accessory
group_10435	1	5.88235	Accessory
group_10436	0	0	Accessory
group_10437	0	0	Accessory
group_10438	0	0	Accessory
group_10439	0	0	Accessory
group_1044	0	0	Accessory
group_10440	0	0	Accessory
group_10441	0	0	Accessory
group_10442	0	0	Accessory
group_10443	0	0	Accessory
group_10444	0	0	Accessory
group_10445	2	11.7647	Accessory
group_10446	0	0	Accessory
group_10447	0	0	Accessory
group_10448	0	0	Accessory
group_10449	0	0	Accessory
group_1045	0	0	Accessory
group_10450	0	0	Accessory
group_10451	0	0	Accessory
group_10452	0	0	Accessory
group_10453	0	0	Accessory
group_10454	0	0	Accessory
group_10455	0	0	Accessory
group_10456	0	0	Accessory
group_10457	0	0	Accessory
group_10458	0	0	Accessory
group_10459	0	0	Accessory
group_1046	1	5.88235	Accessory
group_10460	0	0	Accessory
group_10461	0	0	Accessory
group_10462	0	0	Accessory
group_10463	0	0	Accessory
group_10464	0	0	Accessory
group_10465	0	0	Accessory
group_10466	0	0	Accessory
group_10467	0	0	Accessory
group_10468	0	0	Accessory
group_10469	0	0	Accessory
group_1047	0	0	Accessory
group_10470	0	0	Accessory
group_10471	0	0	Accessory
group_10472	0	0	Accessory
group_10473	0	0	Accessory
group_10474	0	0	Accessory
group_10475	0	0	Accessory
group_10476	0	0	Accessory
group_10477	0	0	Accessory
group_10478	0	0	Accessory
group_10479	0	0	Accessory
group_1048	0	0	Accessory
group_10480	0	0	Accessory
group_10481	0	0	Accessory
group_10482	1	5.88235	Accessory
group_10483	0	0	Accessory
group_10484	0	0	Accessory
group_10485	0	0	Accessory
group_10486	0	0	Accessory
group_10487	0	0	Accessory
group_10488	0	0	Accessory
group_10489	0	0	Accessory
group_1049	0	0	Accessory
group_10490	0	0	Accessory
group_10491	0	0	Accessory
group_10492	0	0	Accessory
group_10493	1	5.88235	Accessory
group_10494	0	0	Accessory
group_10495	0	0	Accessory
group_10496	0	0	Accessory
group_10497	0	0	Accessory
group_10498	0	0	Accessory
group_10499	0	0	Accessory
group_105	0	0	Accessory
group_1050	0	0	Accessory
group_10500	0	0	Accessory
group_10501	0	0	Accessory
group_10502	1	5.88235	Accessory
group_10503	0	0	Accessory
group_10504	0	0	Accessory
group_10505	0	0	Accessory
group_10506	0	0	Accessory
group_10507	0	0	Accessory
group_10508	0	0	Accessory
group_10509	0	0	Accessory
group_1051	0	0	Accessory
group_10510	0	0	Accessory
group_10511	0	0	Accessory
group_10512	0	0	Accessory
group_10513	0	0	Accessory
group_10514	0	0	Accessory
group_10515	0	0	Accessory
group_10516	0	0	Accessory
group_10517	0	0	Accessory
group_10518	0	0	Accessory
group_10519	0	0	Accessory
group_1052	0	0	Accessory
group_10520	0	0	Accessory
group_10521	0	0	Accessory
group_10522	1	5.88235	Accessory
group_10523	0	0	Accessory
group_10524	0	0	Accessory
group_10525	0	0	Accessory
group_10526	0	0	Accessory
group_10527	0	0	Accessory
group_10528	0	0	Accessory
group_10529	0	0	Accessory
group_1053	0	0	Accessory
group_10530	0	0	Accessory
group_10531	0	0	Accessory
group_10532	0	0	Accessory
group_10533	1	5.88235	Accessory
group_10534	1	5.88235	Accessory
group_10535	0	0	Accessory
group_10536	0	0	Accessory
group_10537	0	0	Accessory
group_10538	0	0	Accessory
group_10539	0	0	Accessory
group_1054	0	0	Accessory
group_10540	0	0	Accessory
group_10541	0	0	Accessory
group_10542	0	0	Accessory
group_10543	0	0	Accessory
group_10544	0	0	Accessory
group_10545	0	0	Accessory
group_10546	0	0	Accessory
group_10547	0	0	Accessory
group_10548	0	0	Accessory
group_10549	0	0	Accessory
group_1055	0	0	Accessory
group_10550	0	0	Accessory
group_10551	0	0	Accessory
group_10552	0	0	Accessory
group_10553	0	0	Accessory
group_10554	1	5.88235	Accessory
group_10555	1	5.88235	Accessory
group_10556	1	5.88235	Accessory
group_10557	2	11.7647	Accessory
group_10558	2	11.7647	Accessory
group_10559	0	0	Accessory
group_1056	6	35.2941	Accessory
group_10560	0	0	Accessory
group_10561	0	0	Accessory
group_10562	0	0	Accessory
group_10563	0	0	Accessory
group_10564	1	5.88235	Accessory
group_10565	0	0	Accessory
group_10566	1	5.88235	Accessory
group_10567	1	5.88235	Accessory
group_10568	0	0	Accessory
group_10569	0	0	Accessory
group_1057	0	0	Accessory
group_10570	0	0	Accessory
group_10571	0	0	Accessory
group_10572	0	0	Accessory
group_10573	0	0	Accessory
group_10574	0	0	Accessory
group_10575	0	0	Accessory
group_10576	0	0	Accessory
group_10577	0	0	Accessory
group_10578	0	0	Accessory
group_10579	0	0	Accessory
group_1058	0	0	Accessory
group_10580	0	0	Accessory
group_10581	0	0	Accessory
group_10582	0	0	Accessory
group_10583	3	17.6471	Accessory
group_10584	0	0	Accessory
group_10585	0	0	Accessory
group_10586	0	0	Accessory
group_10587	0	0	Accessory
group_10588	0	0	Accessory
group_10589	0	0	Accessory
group_1059	0	0	Accessory
group_10590	0	0	Accessory
group_10591	0	0	Accessory
group_10592	0	0	Accessory
group_10593	0	0	Accessory
group_10594	0	0	Accessory
group_10595	0	0	Accessory
group_10596	0	0	Accessory
group_10597	0	0	Accessory
group_10598	0	0	Accessory
group_10599	0	0	Accessory
group_106	0	0	Accessory
group_1060	0	0	Accessory
group_10600	3	17.6471	Accessory
group_10601	0	0	Accessory
group_10602	0	0	Accessory
group_10603	0	0	Accessory
group_10604	0	0	Accessory
group_10605	0	0	Accessory
group_10606	0	0	Accessory
group_10607	0	0	Accessory
group_10608	0	0	Accessory
group_10609	0	0	Accessory
group_1061	0	0	Accessory
group_10610	0	0	Accessory
group_10611	0	0	Accessory
group_10612	0	0	Accessory
group_10613	2	11.7647	Accessory
group_10614	0	0	Accessory
group_10615	0	0	Accessory
group_10616	0	0	Accessory
group_10617	0	0	Accessory
group_10618	0	0	Accessory
group_10619	0	0	Accessory
group_1062	0	0	Accessory
group_10620	0	0	Accessory
group_10621	0	0	Accessory
group_10622	0	0	Accessory
group_10623	0	0	Accessory
group_10624	0	0	Accessory
group_10625	0	0	Accessory
group_10626	0	0	Accessory
group_10627	0	0	Accessory
group_10628	0	0	Accessory
group_10629	0	0	Accessory
group_1063	0	0	Accessory
group_10630	0	0	Accessory
group_10631	0	0	Accessory
group_10632	0	0	Accessory
group_10633	0	0	Accessory
group_10634	0	0	Accessory
group_10635	0	0	Accessory
group_10636	0	0	Accessory
group_10637	0	0	Accessory
group_10638	0	0	Accessory
group_10639	0	0	Accessory
group_1064	0	0	Accessory
group_10640	0	0	Accessory
group_10641	0	0	Accessory
group_10642	0	0	Accessory
group_10643	0	0	Accessory
group_10644	0	0	Accessory
group_10645	0	0	Accessory
group_10646	0	0	Accessory
group_10647	0	0	Accessory
group_10648	0	0	Accessory
group_10649	0	0	Accessory
group_1065	0	0	Accessory
group_10650	0	0	Accessory
group_10651	0	0	Accessory
group_10652	0	0	Accessory
group_10653	0	0	Accessory
group_10654	0	0	Accessory
group_10655	0	0	Accessory
group_10656	0	0	Accessory
group_10657	0	0	Accessory
group_10658	0	0	Accessory
group_10659	0	0	Accessory
group_1066	0	0	Accessory
group_10660	0	0	Accessory
group_10661	0	0	Accessory
group_10662	0	0	Accessory
group_10663	0	0	Accessory
group_10664	0	0	Accessory
group_10665	0	0	Accessory
group_10666	0	0	Accessory
group_10667	0	0	Accessory
group_10668	0	0	Accessory
group_10669	0	0	Accessory
group_1067	0	0	Accessory
group_10670	0	0	Accessory
group_10671	0	0	Accessory
group_10672	0	0	Accessory
group_10673	0	0	Accessory
group_10674	0	0	Accessory
group_10675	0	0	Accessory
group_10676	0	0	Accessory
group_10677	0	0	Accessory
group_10678	0	0	Accessory
group_10679	0	0	Accessory
group_1068	0	0	Accessory
group_10680	1	5.88235	Accessory
group_10681	1	5.88235	Accessory
group_10682	0	0	Accessory
group_10683	0	0	Accessory
group_10684	0	0	Accessory
group_10685	0	0	Accessory
group_10686	0	0	Accessory
group_10687	0	0	Accessory
group_10688	0	0	Accessory
group_10689	0	0	Accessory
group_1069	0	0	Accessory
group_10690	0	0	Accessory
group_10691	0	0	Accessory
group_10692	0	0	Accessory
group_10693	1	5.88235	Accessory
group_10694	0	0	Accessory
group_10695	0	0	Accessory
group_10696	0	0	Accessory
group_10697	0	0	Accessory
group_10698	0	0	Accessory
group_10699	0	0	Accessory
group_107	0	0	Accessory
group_1070	0	0	Accessory
group_10700	0	0	Accessory
group_10701	0	0	Accessory
group_10702	0	0	Accessory
group_10703	0	0	Accessory
group_10704	1	5.88235	Accessory
group_10705	0	0	Accessory
group_10706	0	0	Accessory
group_10707	0	0	Accessory
group_10708	0	0	Accessory
group_10709	0	0	Accessory
group_1071	0	0	Accessory
group_10710	0	0	Accessory
group_10711	0	0	Accessory
group_10712	0	0	Accessory
group_10713	0	0	Accessory
group_10714	1	5.88235	Accessory
group_10715	1	5.88235	Accessory
group_10716	0	0	Accessory
group_10717	1	5.88235	Accessory
group_10718	1	5.88235	Accessory
group_10719	2	11.7647	Accessory
group_1072	0	0	Accessory
group_10720	3	17.6471	Accessory
group_10721	2	11.7647	Accessory
group_10722	0	0	Accessory
group_10723	0	0	Accessory
group_10724	0	0	Accessory
group_10725	0	0	Accessory
group_10726	0	0	Accessory
group_10727	1	5.88235	Accessory
group_10728	0	0	Accessory
group_10729	0	0	Accessory
group_1073	0	0	Accessory
group_10730	1	5.88235	Accessory
group_10731	1	5.88235	Accessory
group_10732	1	5.88235	Accessory
group_10733	1	5.88235	Accessory
group_10734	0	0	Accessory
group_10735	0	0	Accessory
group_10736	0	0	Accessory
group_10737	0	0	Accessory
group_10738	0	0	Accessory
group_10739	0	0	Accessory
group_1074	0	0	Accessory
group_10740	0	0	Accessory
group_10741	0	0	Accessory
group_10742	0	0	Accessory
group_10743	0	0	Accessory
group_10744	0	0	Accessory
group_10745	0	0	Accessory
group_10746	0	0	Accessory
group_10747	0	0	Accessory
group_10748	0	0	Accessory
group_10749	0	0	Accessory
group_1075	0	0	Accessory
group_10750	0	0	Accessory
group_10751	0	0	Accessory
group_10752	0	0	Accessory
group_10753	0	0	Accessory
group_10754	0	0	Accessory
group_10755	0	0	Accessory
group_10756	0	0	Accessory
group_10757	0	0	Accessory
group_10758	2	11.7647	Accessory
group_10759	0	0	Accessory
group_1076	0	0	Accessory
group_10760	0	0	Accessory
group_10761	0	0	Accessory
group_10762	0	0	Accessory
group_10763	0	0	Accessory
group_10764	0	0	Accessory
group_10765	0	0	Accessory
group_10766	0	0	Accessory
group_10767	0	0	Accessory
group_10768	1	5.88235	Accessory
group_10769	2	11.7647	Accessory
group_1077	0	0	Accessory
group_10770	1	5.88235	Accessory
group_10771	1	5.88235	Accessory
group_10772	1	5.88235	Accessory
group_10773	1	5.88235	Accessory
group_10774	0	0	Accessory
group_10775	0	0	Accessory
group_10776	0	0	Accessory
group_10777	0	0	Accessory
group_10778	0	0	Accessory
group_10779	0	0	Accessory
group_1078	0	0	Accessory
group_10780	0	0	Accessory
group_10781	0	0	Accessory
group_10782	0	0	Accessory
group_10783	0	0	Accessory
group_10784	0	0	Accessory
group_10785	0	0	Accessory
group_10786	0	0	Accessory
group_10787	0	0	Accessory
group_10788	0	0	Accessory
group_10789	0	0	Accessory
group_1079	0	0	Accessory
group_10790	0	0	Accessory
group_10791	0	0	Accessory
group_10792	0	0	Accessory
group_10793	0	0	Accessory
group_10794	0	0	Accessory
group_10795	0	0	Accessory
group_10796	1	5.88235	Accessory
group_10797	0	0	Accessory
group_10798	0	0	Accessory
group_10799	0	0	Accessory
group_108	0	0	Accessory
group_1080	0	0	Accessory
group_10800	0	0	Accessory
group_10801	1	5.88235	Accessory
group_10802	0	0	Accessory
group_10803	0	0	Accessory
group_10804	0	0	Accessory
group_10805	0	0	Accessory
group_10806	0	0	Accessory
group_10807	1	5.88235	Accessory
group_10808	0	0	Accessory
group_10809	0	0	Accessory
group_1081	0	0	Accessory
group_10810	0	0	Accessory
group_10811	0	0	Accessory
group_10812	1	5.88235	Accessory
group_10813	1	5.88235	Accessory
group_10814	1	5.88235	Accessory
group_10815	0	0	Accessory
group_10816	0	0	Accessory
group_10817	0	0	Accessory
group_10818	0	0	Accessory
group_10819	0	0	Accessory
group_1082	0	0	Accessory
group_10820	0	0	Accessory
group_10821	0	0	Accessory
group_10822	0	0	Accessory
group_10823	0	0	Accessory
group_10824	0	0	Accessory
group_10825	0	0	Accessory
group_10826	0	0	Accessory
group_10827	0	0	Accessory
group_10828	0	0	Accessory
group_10829	0	0	Accessory
group_1083	0	0	Accessory
group_10830	0	0	Accessory
group_10831	0	0	Accessory
group_10832	0	0	Accessory
group_10833	0	0	Accessory
group_10834	0	0	Accessory
group_10835	0	0	Accessory
group_10836	0	0	Accessory
group_10837	0	0	Accessory
group_10838	4	23.5294	Accessory
group_10839	0	0	Accessory
group_1084	2	11.7647	Accessory
group_10840	0	0	Accessory
group_10841	0	0	Accessory
group_10842	0	0	Accessory
group_10843	0	0	Accessory
group_10844	0	0	Accessory
group_10845	3	17.6471	Accessory
group_10846	3	17.6471	Accessory
group_10847	1	5.88235	Accessory
group_10848	1	5.88235	Accessory
group_10849	0	0	Accessory
group_1085	0	0	Accessory
group_10850	0	0	Accessory
group_10851	0	0	Accessory
group_10852	0	0	Accessory
group_10853	0	0	Accessory
group_10854	0	0	Accessory
group_10855	0	0	Accessory
group_10856	0	0	Accessory
group_10857	0	0	Accessory
group_10858	0	0	Accessory
group_10859	1	5.88235	Accessory
group_1086	0	0	Accessory
group_10860	1	5.88235	Accessory
group_10861	0	0	Accessory
group_10862	0	0	Accessory
group_10863	0	0	Accessory
group_10864	0	0	Accessory
group_10865	0	0	Accessory
group_10866	0	0	Accessory
group_10867	0	0	Accessory
group_10868	0	0	Accessory
group_10869	0	0	Accessory
group_1087	0	0	Accessory
group_10870	0	0	Accessory
group_10871	0	0	Accessory
group_10872	0	0	Accessory
group_10873	0	0	Accessory
group_10874	0	0	Accessory
group_10875	0	0	Accessory
group_10876	0	0	Accessory
group_10877	0	0	Accessory
group_10878	0	0	Accessory
group_10879	1	5.88235	Accessory
group_1088	0	0	Accessory
group_10880	0	0	Accessory
group_10881	0	0	Accessory
group_10882	0	0	Accessory
group_10883	0	0	Accessory
group_10884	0	0	Accessory
group_10885	0	0	Accessory
group_10886	0	0	Accessory
group_10887	2	11.7647	Accessory
group_10888	0	0	Accessory
group_10889	0	0	Accessory
group_1089	0	0	Accessory
group_10890	0	0	Accessory
group_10891	0	0	Accessory
group_10892	0	0	Accessory
group_10893	0	0	Accessory
group_10894	0	0	Accessory
group_10895	0	0	Accessory
group_10896	0	0	Accessory
group_10897	0	0	Accessory
group_10898	0	0	Accessory
group_10899	1	5.88235	Accessory
group_109	0	0	Accessory
group_1090	0	0	Accessory
group_10900	1	5.88235	Accessory
group_10901	0	0	Accessory
group_10902	0	0	Accessory
group_10903	0	0	Accessory
group_10904	0	0	Accessory
group_10905	0	0	Accessory
group_10906	0	0	Accessory
group_10907	0	0	Accessory
group_10908	0	0	Accessory
group_10909	0	0	Accessory
group_1091	0	0	Accessory
group_10910	0	0	Accessory
group_10911	0	0	Accessory
group_10912	0	0	Accessory
group_10913	0	0	Accessory
group_10914	0	0	Accessory
group_10915	0	0	Accessory
group_10916	0	0	Accessory
group_10917	0	0	Accessory
group_10918	0	0	Accessory
group_10919	0	0	Accessory
group_1092	0	0	Accessory
group_10920	0	0	Accessory
group_10921	0	0	Accessory
group_10922	0	0	Accessory
group_10923	0	0	Accessory
group_10924	0	0	Accessory
group_10925	0	0	Accessory
group_10926	0	0	Accessory
group_10927	0	0	Accessory
group_10928	0	0	Accessory
group_10929	0	0	Accessory
group_1093	0	0	Accessory
group_10930	2	11.7647	Accessory
group_10931	1	5.88235	Accessory
group_10932	0	0	Accessory
group_10933	0	0	Accessory
group_10934	0	0	Accessory
group_10935	0	0	Accessory
group_10936	0	0	Accessory
group_10937	0	0	Accessory
group_10938	0	0	Accessory
group_10939	0	0	Accessory
group_1094	0	0	Accessory
group_10940	0	0	Accessory
group_10941	0	0	Accessory
group_10942	0	0	Accessory
group_10943	0	0	Accessory
group_10944	0	0	Accessory
group_10945	0	0	Accessory
group_10946	0	0	Accessory
group_10947	0	0	Accessory
group_10948	0	0	Accessory
group_10949	0	0	Accessory
group_1095	0	0	Accessory
group_10950	0	0	Accessory
group_10951	0	0	Accessory
group_10952	1	5.88235	Accessory
group_10953	0	0	Accessory
group_10954	0	0	Accessory
group_10955	0	0	Accessory
group_10956	0	0	Accessory
group_10957	0	0	Accessory
group_10958	0	0	Accessory
group_10959	0	0	Accessory
group_1096	1	5.88235	Accessory
group_10960	0	0	Accessory
group_10961	0	0	Accessory
group_10962	0	0	Accessory
group_10963	0	0	Accessory
group_10964	0	0	Accessory
group_10965	1	5.88235	Accessory
group_10966	0	0	Accessory
group_10967	0	0	Accessory
group_10968	0	0	Accessory
group_10969	0	0	Accessory
group_1097	0	0	Accessory
group_10970	0	0	Accessory
group_10971	0	0	Accessory
group_10972	0	0	Accessory
group_10973	0	0	Accessory
group_10974	0	0	Accessory
group_10975	0	0	Accessory
group_10976	0	0	Accessory
group_10977	0	0	Accessory
group_10978	0	0	Accessory
group_10979	0	0	Accessory
group_1098	0	0	Accessory
group_10980	1	5.88235	Accessory
group_10981	0	0	Accessory
group_10982	0	0	Accessory
group_10983	0	0	Accessory
group_10984	0	0	Accessory
group_10985	0	0	Accessory
group_10986	0	0	Accessory
group_10987	0	0	Accessory
group_10988	0	0	Accessory
group_10989	0	0	Accessory
group_1099	0	0	Accessory
group_10990	0	0	Accessory
group_10991	0	0	Accessory
group_10992	0	0	Accessory
group_10993	0	0	Accessory
group_10994	0	0	Accessory
group_10995	0	0	Accessory
group_10996	0	0	Accessory
group_10997	0	0	Accessory
group_10998	0	0	Accessory
group_10999	1	5.88235	Accessory
group_11	0	0	Accessory
group_110	0	0	Accessory
group_1100	17	100	Core
group_11000	0	0	Accessory
group_11001	0	0	Accessory
group_11002	0	0	Accessory
group_11003	0	0	Accessory
group_11004	0	0	Accessory
group_11005	0	0	Accessory
group_11006	0	0	Accessory
group_11007	0	0	Accessory
group_11008	0	0	Accessory
group_11009	0	0	Accessory
group_1101	0	0	Accessory
group_11010	0	0	Accessory
group_11011	0	0	Accessory
group_11012	0	0	Accessory
group_11013	0	0	Accessory
group_11014	0	0	Accessory
group_11015	0	0	Accessory
group_11016	0	0	Accessory
group_11017	0	0	Accessory
group_11018	0	0	Accessory
group_11019	0	0	Accessory
group_1102	17	100	Core
group_11020	0	0	Accessory
group_11021	0	0	Accessory
group_11022	0	0	Accessory
group_11023	0	0	Accessory
group_11024	0	0	Accessory
group_11025	0	0	Accessory
group_11026	7	41.1765	Accessory
group_11027	0	0	Accessory
group_11028	0	0	Accessory
group_11029	0	0	Accessory
group_1103	0	0	Accessory
group_11030	0	0	Accessory
group_11031	0	0	Accessory
group_11032	0	0	Accessory
group_11033	0	0	Accessory
group_11034	0	0	Accessory
group_11035	0	0	Accessory
group_11036	0	0	Accessory
group_11037	0	0	Accessory
group_11038	0	0	Accessory
group_11039	0	0	Accessory
group_1104	0	0	Accessory
group_11040	3	17.6471	Accessory
group_11041	1	5.88235	Accessory
group_11042	5	29.4118	Accessory
group_11043	1	5.88235	Accessory
group_11044	2	11.7647	Accessory
group_11045	0	0	Accessory
group_11046	0	0	Accessory
group_11047	0	0	Accessory
group_11048	0	0	Accessory
group_11049	1	5.88235	Accessory
group_1105	4	23.5294	Accessory
group_11050	0	0	Accessory
group_11051	0	0	Accessory
group_11052	0	0	Accessory
group_11053	0	0	Accessory
group_11054	1	5.88235	Accessory
group_11055	1	5.88235	Accessory
group_11056	1	5.88235	Accessory
group_11057	0	0	Accessory
group_11058	0	0	Accessory
group_11059	0	0	Accessory
group_1106	0	0	Accessory
group_11060	0	0	Accessory
group_11061	0	0	Accessory
group_11062	0	0	Accessory
group_11063	0	0	Accessory
group_11064	0	0	Accessory
group_11065	0	0	Accessory
group_11066	0	0	Accessory
group_11067	0	0	Accessory
group_11068	0	0	Accessory
group_11069	0	0	Accessory
group_1107	0	0	Accessory
group_11070	0	0	Accessory
group_11071	1	5.88235	Accessory
group_11072	0	0	Accessory
group_11073	0	0	Accessory
group_11074	0	0	Accessory
group_11075	0	0	Accessory
group_11076	0	0	Accessory
group_11077	0	0	Accessory
group_11078	0	0	Accessory
group_11079	0	0	Accessory
group_1108	0	0	Accessory
group_11080	0	0	Accessory
group_11081	0	0	Accessory
group_11082	0	0	Accessory
group_11083	0	0	Accessory
group_11084	0	0	Accessory
group_11085	0	0	Accessory
group_11086	0	0	Accessory
group_11087	0	0	Accessory
group_11088	2	11.7647	Accessory
group_11089	0	0	Accessory
group_1109	0	0	Accessory
group_11090	0	0	Accessory
group_11091	0	0	Accessory
group_11092	0	0	Accessory
group_11093	0	0	Accessory
group_11094	0	0	Accessory
group_11095	0	0	Accessory
group_11096	0	0	Accessory
group_11097	0	0	Accessory
group_11098	2	11.7647	Accessory
group_11099	0	0	Accessory
group_111	0	0	Accessory
group_1110	0	0	Accessory
group_11100	0	0	Accessory
group_11101	1	5.88235	Accessory
group_11102	0	0	Accessory
group_11103	0	0	Accessory
group_11104	0	0	Accessory
group_11105	0	0	Accessory
group_11106	0	0	Accessory
group_11107	0	0	Accessory
group_11108	0	0	Accessory
group_11109	0	0	Accessory
group_1111	0	0	Accessory
group_11110	0	0	Accessory
group_11111	0	0	Accessory
group_11112	0	0	Accessory
group_11113	0	0	Accessory
group_11114	0	0	Accessory
group_11115	0	0	Accessory
group_11116	0	0	Accessory
[truncated: 23,138 more rows]

## Sheet: Cluster 4
Supplementary Table 7: Core and accessory genes identified in Cluster 4
Gene	n_present	core_percentage	gene_type
aCT	25	100	Core
aF0785	19	76	Accessory
aF2118	22	88	Accessory
aIM24	5	20	Accessory
aRA1	0	0	Accessory
aRO8	0	0	Accessory
aac6	0	0	Accessory
aarF	0	0	Accessory
abcX	0	0	Accessory
abcf	25	100	Core
abgB	0	0	Accessory
abiF	2	8	Accessory
abiH	1	4	Accessory
abiV	0	0	Accessory
abpA	0	0	Accessory
abrB	8	32	Accessory
accA	25	100	Core
accB	25	100	Core
accC	0	0	Accessory
accD	25	100	Core
aceF	23	92	Accessory
ackA	0	0	Accessory
acm	0	0	Accessory
acnA	0	0	Accessory
acoA	0	0	Accessory
acoA~~~pdhA	23	92	Accessory
acoB	23	92	Accessory
acpA	13	52	Accessory
acpA~~~acpB	8	32	Accessory
acpB	1	4	Accessory
acpP	25	100	Core
acpS	0	0	Accessory
acrA	0	0	Accessory
acrIIA6	0	0	Accessory
acrR	0	0	Accessory
acrR~~~tetR	24	96	Accessory
acuB	0	0	Accessory
acuB~~~cBS	25	100	Core
acuI~~~yhfP	0	0	Accessory
acyP	25	100	Core
adaA	0	0	Accessory
adaB	0	0	Accessory
adcA	0	0	Accessory
adcC	0	0	Accessory
add	0	0	Accessory
addA	0	0	Accessory
adhE	0	0	Accessory
adhP	25	100	Core
adk	25	100	Core
aes	0	0	Accessory
afuA	3	12	Accessory
afuC	14	56	Accessory
aga	0	0	Accessory
agaB	25	100	Core
agaS	25	100	Core
agrC	0	0	Accessory
aguA	0	0	Accessory
aguB	17	68	Accessory
ahpC	0	0	Accessory
ahpF	0	0	Accessory
alaS	0	0	Accessory
albA	0	0	Accessory
albE~~~pqqL	25	100	Core
albF	0	0	Accessory
albF~~~pqqL	25	100	Core
ald	0	0	Accessory
aliA	25	100	Core
aliA~~~sarA~~~oppA	24	96	Accessory
alkD	0	0	Accessory
alpA	2	8	Accessory
alr	25	100	Core
alr~~~acpS	25	100	Core
alsS	0	0	Accessory
alsT	0	0	Accessory
alwI	0	0	Accessory
amaP	0	0	Accessory
amiA	0	0	Accessory
amiF~~~oppF	25	100	Core
ampC	0	0	Accessory
ampH	0	0	Accessory
ampH~~~ampC	25	100	Core
ampS~~~pepS	25	100	Core
amrA	0	0	Accessory
amsE	23	92	Accessory
amt	0	0	Accessory
amtB	0	0	Accessory
amyA	25	100	Core
ansA	0	0	Accessory
ansP	25	100	Core
ant6	24	96	Accessory
apbE	0	0	Accessory
apeA	0	0	Accessory
aph3IIIa	0	0	Accessory
aprE	15	60	Accessory
apt	25	100	Core
araC	0	0	Accessory
araC~~~tetD	0	0	Accessory
araD	7	28	Accessory
araJ	0	0	Accessory
araQ	0	0	Accessory
araQ~~~ugpE	23	92	Accessory
arcA	0	0	Accessory
arcC	0	0	Accessory
arcR	0	0	Accessory
arcT	0	0	Accessory
ardA	0	0	Accessory
argA~~~ywnH	24	96	Accessory
argB	0	0	Accessory
argC	0	0	Accessory
argD	0	0	Accessory
argE	25	100	Core
argF	0	0	Accessory
argG	0	0	Accessory
argH	0	0	Accessory
argJ	0	0	Accessory
argR	25	100	Core
argS	25	100	Core
arlR	0	0	Accessory
arlR~~~csrR~~~ompR	25	100	Core
aroA	0	0	Accessory
aroB	0	0	Accessory
aroB~~~aroE	25	100	Core
aroC	25	100	Core
aroD	25	100	Core
aroE	0	0	Accessory
aroG1	25	100	Core
aroK	25	100	Core
arpU	0	0	Accessory
arsC	2	8	Accessory
arsC~~~adaB	25	100	Core
arsR	0	0	Accessory
artM	0	0	Accessory
asbA	0	0	Accessory
ascB	0	0	Accessory
asd	25	100	Core
asnA	0	0	Accessory
asnS	25	100	Core
asp1	9	36	Accessory
asp2	9	36	Accessory
asp3	1	4	Accessory
asp4	0	0	Accessory
asp5	0	0	Accessory
aspB	25	100	Core
aspB~~~alaT	0	0	Accessory
aspS	0	0	Accessory
atoS	0	0	Accessory
atpA	25	100	Core
atpB	25	100	Core
atpC	25	100	Core
atpD	25	100	Core
atpE	0	0	Accessory
atpF	25	100	Core
atpG	25	100	Core
atpH	0	0	Accessory
avrD	6	24	Accessory
axe1	22	88	Accessory
azlC	25	100	Core
azlC~~~ygaZ	0	0	Accessory
azlD	25	100	Core
azlD2	0	0	Accessory
baeS	0	0	Accessory
bcc	0	0	Accessory
bceA	3	12	Accessory
bceB	0	0	Accessory
bceB~~~yxdM	25	100	Core
bcrC	0	0	Accessory
bcsA	0	0	Accessory
bcsZ	0	0	Accessory
beeE	0	0	Accessory
bepR	7	28	Accessory
bet	0	0	Accessory
betI~~~tetR	9	36	Accessory
bglB	0	0	Accessory
bglB~~~gmuD~~~bglA	23	92	Accessory
bglG	1	4	Accessory
bglG~~~licT	0	0	Accessory
bglH	0	0	Accessory
bgrS	1	4	Accessory
bhtF	0	0	Accessory
bigG	0	0	Accessory
bioF	0	0	Accessory
bioH	0	0	Accessory
bioY	9	36	Accessory
birA	0	0	Accessory
blaR1	0	0	Accessory
blpA	6	24	Accessory
blpC	1	4	Accessory
blpI	2	8	Accessory
blpJ	1	4	Accessory
blpL	22	88	Accessory
blpM	0	0	Accessory
blpO	1	4	Accessory
blpP	1	4	Accessory
blpR	0	0	Accessory
blpS~~~lytR~~~lytT	9	36	Accessory
blpT	0	0	Accessory
blpX	9	36	Accessory
blpY	3	12	Accessory
blpZ	25	100	Core
bofA	0	0	Accessory
briC	0	0	Accessory
brkB	0	0	Accessory
brkB~~~yihY	0	0	Accessory
brnQ	24	96	Accessory
brpA	0	0	Accessory
btuD	24	96	Accessory
btuE	24	96	Accessory
budA	0	0	Accessory
cDA1	0	0	Accessory
cadA	0	0	Accessory
cadD	0	0	Accessory
cadX	0	0	Accessory
caiA	0	0	Accessory
caiD~~~fabM	25	100	Core
capA	0	0	Accessory
capD	0	0	Accessory
carA	25	100	Core
carB	0	0	Accessory
cas1	5	20	Accessory
cas10	1	4	Accessory
cas1c	0	0	Accessory
cas2	5	20	Accessory
cas3	0	0	Accessory
cas4	0	0	Accessory
cas5c	0	0	Accessory
cas6	0	0	Accessory
cas7c	0	0	Accessory
cas8c	0	0	Accessory
cas9	0	0	Accessory
catE	25	100	Core
cbbX	0	0	Accessory
cbiA	0	0	Accessory
cbiB	0	0	Accessory
cbiC	0	0	Accessory
cbiD	0	0	Accessory
cbiE	0	0	Accessory
cbiF	0	0	Accessory
cbiG	0	0	Accessory
cbiM	0	0	Accessory
cbiN	0	0	Accessory
cbiO	0	0	Accessory
cbiQ	0	0	Accessory
cbiT	0	0	Accessory
cbpB	25	100	Core
cbpC	7	28	Accessory
cbpD	16	64	Accessory
cbpD2	0	0	Accessory
cbpE	12	48	Accessory
cbpF~~~cbpJ	24	96	Accessory
cbpI	1	4	Accessory
cbrC	0	0	Accessory
cca	0	0	Accessory
ccc1	25	100	Core
ccdA	0	0	Accessory
ccdA2	0	0	Accessory
ccdA2~~~ccdA	25	100	Core
ccmA	22	88	Accessory
ccmD	0	0	Accessory
ccmE	0	0	Accessory
ccmK	0	0	Accessory
ccoS	6	24	Accessory
ccpA	0	0	Accessory
ccpA~~~lacI	25	100	Core
ccpN	0	0	Accessory
ccrZ	25	100	Core
cdaA	0	0	Accessory
cdaR~~~ybbR	25	100	Core
cdd	25	100	Core
cdiI	0	0	Accessory
cdsA	25	100	Core
celA	7	28	Accessory
celA~~~comEA	25	100	Core
celB	0	0	Accessory
celB~~~comEC	25	100	Core
celC	7	28	Accessory
celC~~~bigG	0	0	Accessory
ceuA	0	0	Accessory
ceuB	0	0	Accessory
ceuC	0	0	Accessory
ceuD	0	0	Accessory
chaP	0	0	Accessory
ciaH~~~baeS	25	100	Core
ciaR	0	0	Accessory
cibA	8	32	Accessory
cibB	8	32	Accessory
cinA	25	100	Core
citA	0	0	Accessory
citB	0	0	Accessory
citB~~~luxR~~~degU	25	100	Core
citC	0	0	Accessory
citD	0	0	Accessory
citE	0	0	Accessory
citF	0	0	Accessory
citG	0	0	Accessory
citM	0	0	Accessory
citS	0	0	Accessory
citS~~~yesM	25	100	Core
citX	0	0	Accessory
citZ	0	0	Accessory
clcA	25	100	Core
clcB	0	0	Accessory
clpA	0	0	Accessory
clpA~~~clpC	25	100	Core
clpA~~~clpE	25	100	Core
clpB	0	0	Accessory
clpC	0	0	Accessory
clpC1	0	0	Accessory
clpE	0	0	Accessory
clpL	0	0	Accessory
clpL~~~clpA	25	100	Core
clpP	25	100	Core
clpX	0	0	Accessory
cls	25	100	Core
cmk	25	100	Core
cmr4	0	0	Accessory
coaA	25	100	Core
coaB	0	0	Accessory
coaC	25	100	Core
coaD	0	0	Accessory
coaE	0	0	Accessory
cobA	0	0	Accessory
cobB	0	0	Accessory
cobD	0	0	Accessory
cobI	0	0	Accessory
cobJ	0	0	Accessory
cobK	0	0	Accessory
cobN	0	0	Accessory
cobQ	0	0	Accessory
cobQ~~~gatD	25	100	Core
cobS	0	0	Accessory
cobT	0	0	Accessory
cobU	0	0	Accessory
codY	0	0	Accessory
cof	0	0	Accessory
cofD	0	0	Accessory
cof~~~ybjI	25	100	Core
coiA	25	100	Core
coiA~~~prsA	0	0	Accessory
comA	0	0	Accessory
comA~~~pncF	24	96	Accessory
comB	0	0	Accessory
comC	0	0	Accessory
comD	0	0	Accessory
comD~~~natK	0	0	Accessory
comD~~~yesM~~~dcuS	24	96	Accessory
comE	0	0	Accessory
comEA	0	0	Accessory
comEB	0	0	Accessory
comEC	0	0	Accessory
comE~~~comEB	25	100	Core
comF	0	0	Accessory
comFA	0	0	Accessory
comFA~~~comF	0	0	Accessory
comFC	0	0	Accessory
comF~~~comFC	25	100	Core
comF~~~recG~~~comFA	25	100	Core
comGA	0	0	Accessory
comGA~~~comGB	25	100	Core
comGB	0	0	Accessory
comGC	25	100	Core
comGD	25	100	Core
comGE	0	0	Accessory
comGF	0	0	Accessory
comGF~~~comGG	25	100	Core
comGG	0	0	Accessory
comM	0	0	Accessory
comP	0	0	Accessory
comR	5	20	Accessory
comR1	0	0	Accessory
comW	0	0	Accessory
comX	0	0	Accessory
comX1	13	52	Accessory
comX1~~~comX	0	0	Accessory
comX2	0	0	Accessory
comX2~~~comX1	11	44	Accessory
copG	0	0	Accessory
copY	2	8	Accessory
copZ	0	0	Accessory
corA	25	100	Core
cotH	0	0	Accessory
cotS	0	0	Accessory
cotS~~~licA	25	100	Core
cpdA	0	0	Accessory
cpdB	0	0	Accessory
cpoA	25	100	Core
cppA	0	0	Accessory
cps2a	0	0	Accessory
cps4B	0	0	Accessory
cpsC	22	88	Accessory
cpsD	4	16	Accessory
cpsD~~~mrp	22	88	Accessory
cpsE~~~wcaJ~~~epsL	18	72	Accessory
cpsI	4	16	Accessory
cpsJ	0	0	Accessory
cpsL	0	0	Accessory
cpsO~~~epsJ	10	40	Accessory
crcB	0	0	Accessory
crcB~~~fluC	23	92	Accessory
crp	0	0	Accessory
csbD	15	60	Accessory
cshA	0	0	Accessory
cshA~~~srmB	25	100	Core
cshA~~~srmB~~~yfmL	25	100	Core
cshB	4	16	Accessory
cshB~~~srmB	25	100	Core
csm2	0	0	Accessory
csm3	0	0	Accessory
csm4	1	4	Accessory
csm5	0	0	Accessory
csm6	1	4	Accessory
csn2	5	20	Accessory
csoR	11	44	Accessory
ctpA	0	0	Accessory
ctsR	25	100	Core
cutC	0	0	Accessory
cutD	0	0	Accessory
cvfB	0	0	Accessory
cvpA	0	0	Accessory
cwlA	0	0	Accessory
cwlO	25	100	Core
cydC	0	0	Accessory
cydD	0	0	Accessory
cylB	0	0	Accessory
cynT	20	80	Accessory
cynX	25	100	Core
cysA	0	0	Accessory
cysB	0	0	Accessory
cysE	0	0	Accessory
cysE~~~epsC~~~rimI	25	100	Core
cysK	25	100	Core
cysS	25	100	Core
czcD	24	96	Accessory
dAP2	0	0	Accessory
dLH	0	0	Accessory
dacC	0	0	Accessory
dadA	25	100	Core
dam	0	0	Accessory
dapA	25	100	Core
dapB	0	0	Accessory
dapD	25	100	Core
darT	1	4	Accessory
dcm	0	0	Accessory
ddl	25	100	Core
dedA	0	0	Accessory
def	25	100	Core
degA	0	0	Accessory
degP	0	0	Accessory
degV	0	0	Accessory
degV~~~trmH	0	0	Accessory
deoB	25	100	Core
deoC	25	100	Core
deoD	25	100	Core
deoR	1	4	Accessory
deoR~~~glpR	25	100	Core
deoR~~~ulaR~~~glpR	7	28	Accessory
der	0	0	Accessory
dexB	24	96	Accessory
dgkA	25	100	Core
dhaK	0	0	Accessory
dhaK~~~dhaQ	0	0	Accessory
dhaL	0	0	Accessory
dhaM	19	76	Accessory
dhaQ	0	0	Accessory
dhaS	0	0	Accessory
dhfR	25	100	Core
dicA	0	0	Accessory
dinB	25	100	Core
dinD	0	0	Accessory
dinF	0	0	Accessory
dinG	0	0	Accessory
divIB	0	0	Accessory
divIVA	25	100	Core
dltA	0	0	Accessory
dltB	9	36	Accessory
dltC	0	0	Accessory
dltD	9	36	Accessory
dltR	0	0	Accessory
dnaA	0	0	Accessory
dnaB	3	12	Accessory
dnaB~~~dnaD	25	100	Core
dnaC	0	0	Accessory
dnaD	25	100	Core
dnaE	0	0	Accessory
dnaG	25	100	Core
dnaI	0	0	Accessory
dnaJ	0	0	Accessory
dnaK	25	100	Core
dnaN	0	0	Accessory
dnaQ	0	0	Accessory
dnaQ~~~dinG~~~polC	25	100	Core
dnaQ~~~polC	0	0	Accessory
dnaX	0	0	Accessory
doc	4	16	Accessory
dpiB	0	0	Accessory
dpnA	3	12	Accessory
dpnD	8	32	Accessory
dpnI	25	100	Core
dpnM	3	12	Accessory
dppB	0	0	Accessory
dppC	0	0	Accessory
dppD	0	0	Accessory
dprA	25	100	Core
dps	25	100	Core
draG	3	12	Accessory
drrA	3	12	Accessory
drrB	4	16	Accessory
dsbD	0	0	Accessory
dtd	25	100	Core
dusB	25	100	Core
dut	25	100	Core
eCFS	18	72	Accessory
eMAP	25	100	Core
eRG12	0	0	Accessory
eamA	6	24	Accessory
eamA~~~rhaT	25	100	Core
eamA~~~yicL	25	100	Core
ebgC	20	80	Accessory
ebhA	2	8	Accessory
ebsA	0	0	Accessory
ebsC	25	100	Core
ecfA1	0	0	Accessory
ecfA2	0	0	Accessory
ecfT	0	0	Accessory
ecfT~~~mtsC~~~cbiQ	25	100	Core
ecsA~~~ccmA	25	100	Core
ecsB	0	0	Accessory
ecsC	0	0	Accessory
eda	0	0	Accessory
efeB	8	32	Accessory
efeO	12	48	Accessory
efeU	9	36	Accessory
efiE	0	0	Accessory
efp	25	100	Core
egtUA	25	100	Core
egtUBC	25	100	Core
ehuA	25	100	Core
elaA	0	0	Accessory
elaC	0	0	Accessory
elsH	0	0	Accessory
elyC	0	0	Accessory
endA	25	100	Core
engA	1	4	Accessory
eno	0	0	Accessory
entS	18	72	Accessory
epsA	0	0	Accessory
epsB	4	16	Accessory
epsE	0	0	Accessory
epsF	2	8	Accessory
epsG	4	16	Accessory
epsH	0	0	Accessory
epsJ	6	24	Accessory
epsJ~~~wcaA	12	48	Accessory
epsL	4	16	Accessory
epsN	0	0	Accessory
epsV	0	0	Accessory
epuA	0	0	Accessory
era	25	100	Core
eriC	0	0	Accessory
ermB	1	4	Accessory
ermL~~~ermC	1	4	Accessory
esaA	3	12	Accessory
esaC	0	0	Accessory
escB	0	0	Accessory
essA	0	0	Accessory
essB	0	0	Accessory
essC	0	0	Accessory
essC~~~ftsK	0	0	Accessory
esxA	0	0	Accessory
eutA	0	0	Accessory
eutC	0	0	Accessory
eutD	0	0	Accessory
eutH	0	0	Accessory
eutJ	0	0	Accessory
eutL	0	0	Accessory
eutM	0	0	Accessory
eutN	0	0	Accessory
eutP	0	0	Accessory
eutQ	0	0	Accessory
exoY~~~wcaJ	25	100	Core
exp7~~~mgtA	25	100	Core
exp8	25	100	Core
ezrA	25	100	Core
fAU1	25	100	Core
fIDO	3	12	Accessory
fMR2	0	0	Accessory
fabD	0	0	Accessory
fabF	25	100	Core
fabG	25	100	Core
fabH	25	100	Core
fabK	25	100	Core
fabM	0	0	Accessory
fabZ	25	100	Core
fabZ~~~fatA	25	100	Core
fabZ~~~paaI	24	96	Accessory
fabZ~~~spxR	0	0	Accessory
fadH2	0	0	Accessory
fadM	0	0	Accessory
fasA	0	0	Accessory
fatA	0	0	Accessory
fba	25	100	Core
fbp	0	0	Accessory
fbpA	0	0	Accessory
fbpB	3	12	Accessory
fctA	0	0	Accessory
femA	0	0	Accessory
femA~~~murN	16	64	Accessory
femB~~~fmhB	0	0	Accessory
feoA	0	0	Accessory
feoB	0	0	Accessory
fer	4	16	Accessory
ffh	25	100	Core
fghA	0	0	Accessory
fhs	0	0	Accessory
fhs1	0	0	Accessory
fhs~~~fhs2	25	100	Core
fibA	0	0	Accessory
fieF	0	0	Accessory
fieF~~~mntE	25	100	Core
fimA	0	0	Accessory
fimB	1	4	Accessory
fimC	0	0	Accessory
flaA1	25	100	Core
fldA	25	100	Core
flgJ	0	0	Accessory
flgM	0	0	Accessory
fliA	0	0	Accessory
fliJ	0	0	Accessory
fliK	0	0	Accessory
fliS	0	0	Accessory
fmhB	7	28	Accessory
fmnP	25	100	Core
fmt	25	100	Core
fmtA	0	0	Accessory
fni	0	0	Accessory
focA	25	100	Core
folA	0	0	Accessory
folB	0	0	Accessory
folC	25	100	Core
folD	25	100	Core
folE	0	0	Accessory
folK	0	0	Accessory
folK~~~folB	25	100	Core
folP	0	0	Accessory
folT	0	0	Accessory
frmA	0	0	Accessory
frmB	25	100	Core
frr	0	0	Accessory
fruA	0	0	Accessory
fruA~~~luxR	5	20	Accessory
frvX	25	100	Core
fsa	7	28	Accessory
fszA	0	0	Accessory
ftcD	0	0	Accessory
ftf	0	0	Accessory
ftsA	25	100	Core
ftsB	0	0	Accessory
ftsE	0	0	Accessory
ftsH	0	0	Accessory
ftsJ	0	0	Accessory
ftsK	0	0	Accessory
ftsL	0	0	Accessory
ftsQ	0	0	Accessory
ftsW	25	100	Core
ftsX	0	0	Accessory
ftsY	25	100	Core
ftsZ	0	0	Accessory
ftsZ~~~murF	0	0	Accessory
fucI	0	0	Accessory
fucO	0	0	Accessory
fucO~~~gldA	6	24	Accessory
funZ	0	0	Accessory
fur	0	0	Accessory
fusA	0	0	Accessory
galA	10	40	Accessory
galE	0	0	Accessory
galK	0	0	Accessory
galM	25	100	Core
galR	0	0	Accessory
galT	3	12	Accessory
galT2~~~galT	25	100	Core
galU	25	100	Core
ganA	25	100	Core
gap	0	0	Accessory
gapN	0	0	Accessory
gatA	0	0	Accessory
gatB	0	0	Accessory
gatC	0	0	Accessory
gbpC	0	0	Accessory
gdhA	25	100	Core
gdmH	0	0	Accessory
gdpP	25	100	Core
gldA	7	28	Accessory
glf	11	44	Accessory
glgA	25	100	Core
glgB	25	100	Core
glgC	25	100	Core
glgD	25	100	Core
glgP	0	0	Accessory
glmM	0	0	Accessory
glmS	25	100	Core
glmU	25	100	Core
glnA	0	0	Accessory
glnH	13	52	Accessory
glnK	0	0	Accessory
glnQ	13	52	Accessory
glnQ~~~artM	23	92	Accessory
glnQ~~~yxeN	0	0	Accessory
glnR	0	0	Accessory
glnR~~~merR	25	100	Core
gloA	0	0	Accessory
gloB	25	100	Core
gloB~~~yqgX	0	0	Accessory
glpE	11	44	Accessory
glpE~~~moeZ~~~pspE	25	100	Core
glpF	25	100	Core
glpG	25	100	Core
glpK	25	100	Core
glpO	25	100	Core
glpR	1	4	Accessory
gltA	0	0	Accessory
gltB	0	0	Accessory
gltC	0	0	Accessory
gltD	0	0	Accessory
gltX	25	100	Core
gluP	0	0	Accessory
glvR	0	0	Accessory
glxK	0	0	Accessory
gly	0	0	Accessory
glyA	25	100	Core
glyE	1	4	Accessory
glyG	1	4	Accessory
glyP~~~alsT	25	100	Core
glyQ	25	100	Core
glyS	0	0	Accessory
gmk	25	100	Core
gmuD	0	0	Accessory
gndA	25	100	Core
gntR	3	12	Accessory
gntR~~~aRO8	2	8	Accessory
gntR~~~ubiC	25	100	Core
gntR~~~ytrA~~~yhcF	25	100	Core
gntR~~~yvoA~~~mngR	25	100	Core
gntX	0	0	Accessory
gor	25	100	Core
gorA	0	0	Accessory
gph	25	100	Core
gpmA	25	100	Core
gpmB2	0	0	Accessory
gpsA	25	100	Core
gpsB	25	100	Core
greA	25	100	Core
groES	25	100	Core
groL	25	100	Core
group_0	0	0	Accessory
group_1	11	44	Accessory
group_10	0	0	Accessory
group_100	0	0	Accessory
group_1000	0	0	Accessory
group_10000	0	0	Accessory
group_10001	0	0	Accessory
group_10002	1	4	Accessory
group_10003	0	0	Accessory
group_10004	0	0	Accessory
group_10005	1	4	Accessory
group_10006	0	0	Accessory
group_10007	0	0	Accessory
group_10008	0	0	Accessory
group_10009	1	4	Accessory
group_1001	0	0	Accessory
group_10010	0	0	Accessory
group_10011	1	4	Accessory
group_10012	0	0	Accessory
group_10013	0	0	Accessory
group_10014	0	0	Accessory
group_10015	0	0	Accessory
group_10016	2	8	Accessory
group_10017	1	4	Accessory
group_10018	0	0	Accessory
group_10019	0	0	Accessory
group_1002	0	0	Accessory
group_10020	1	4	Accessory
group_10021	0	0	Accessory
group_10022	0	0	Accessory
group_10023	0	0	Accessory
group_10024	0	0	Accessory
group_10025	0	0	Accessory
group_10026	0	0	Accessory
group_10027	0	0	Accessory
group_10028	0	0	Accessory
group_10029	0	0	Accessory
group_1003	0	0	Accessory
group_10030	0	0	Accessory
group_10031	0	0	Accessory
group_10032	0	0	Accessory
group_10033	0	0	Accessory
group_10034	0	0	Accessory
group_10035	0	0	Accessory
group_10036	1	4	Accessory
group_10037	3	12	Accessory
group_10038	0	0	Accessory
group_10039	0	0	Accessory
group_1004	0	0	Accessory
group_10040	0	0	Accessory
group_10041	0	0	Accessory
group_10042	0	0	Accessory
group_10043	1	4	Accessory
group_10044	1	4	Accessory
group_10045	0	0	Accessory
group_10046	2	8	Accessory
group_10047	0	0	Accessory
group_10048	0	0	Accessory
group_10049	0	0	Accessory
group_1005	0	0	Accessory
group_10050	0	0	Accessory
group_10051	1	4	Accessory
group_10052	1	4	Accessory
group_10053	0	0	Accessory
group_10054	0	0	Accessory
group_10055	0	0	Accessory
group_10056	0	0	Accessory
group_10057	0	0	Accessory
group_10058	0	0	Accessory
group_10059	0	0	Accessory
group_1006	2	8	Accessory
group_10060	0	0	Accessory
group_10061	0	0	Accessory
group_10062	0	0	Accessory
group_10063	0	0	Accessory
group_10064	0	0	Accessory
group_10065	0	0	Accessory
group_10066	0	0	Accessory
group_10067	0	0	Accessory
group_10068	0	0	Accessory
group_10069	0	0	Accessory
group_1007	0	0	Accessory
group_10070	0	0	Accessory
group_10071	0	0	Accessory
group_10072	1	4	Accessory
group_10073	0	0	Accessory
group_10074	1	4	Accessory
group_10075	0	0	Accessory
group_10076	0	0	Accessory
group_10077	0	0	Accessory
group_10078	0	0	Accessory
group_10079	0	0	Accessory
group_1008	3	12	Accessory
group_10080	0	0	Accessory
group_10081	0	0	Accessory
group_10082	0	0	Accessory
group_10083	1	4	Accessory
group_10084	0	0	Accessory
group_10085	0	0	Accessory
group_10086	0	0	Accessory
group_10087	0	0	Accessory
group_10088	0	0	Accessory
group_10089	0	0	Accessory
group_1009	0	0	Accessory
group_10090	0	0	Accessory
group_10091	0	0	Accessory
group_10092	0	0	Accessory
group_10093	0	0	Accessory
group_10094	0	0	Accessory
group_10095	0	0	Accessory
group_10096	0	0	Accessory
group_10097	0	0	Accessory
group_10098	1	4	Accessory
group_10099	0	0	Accessory
group_101	0	0	Accessory
group_1010	0	0	Accessory
group_10100	0	0	Accessory
group_10101	0	0	Accessory
group_10102	0	0	Accessory
group_10103	0	0	Accessory
group_10104	0	0	Accessory
group_10105	1	4	Accessory
group_10106	0	0	Accessory
group_10107	0	0	Accessory
group_10108	0	0	Accessory
group_10109	0	0	Accessory
group_1011	0	0	Accessory
group_10110	0	0	Accessory
group_10111	1	4	Accessory
group_10112	0	0	Accessory
group_10113	0	0	Accessory
group_10114	0	0	Accessory
group_10115	1	4	Accessory
group_10116	0	0	Accessory
group_10117	0	0	Accessory
group_10118	1	4	Accessory
group_10119	0	0	Accessory
group_1012	2	8	Accessory
group_10120	0	0	Accessory
group_10121	0	0	Accessory
group_10122	0	0	Accessory
group_10123	0	0	Accessory
group_10124	0	0	Accessory
group_10125	0	0	Accessory
group_10126	0	0	Accessory
group_10127	1	4	Accessory
group_10128	0	0	Accessory
group_10129	0	0	Accessory
group_1013	0	0	Accessory
group_10130	0	0	Accessory
group_10131	0	0	Accessory
group_10132	0	0	Accessory
group_10133	0	0	Accessory
group_10134	0	0	Accessory
group_10135	0	0	Accessory
group_10136	0	0	Accessory
group_10137	0	0	Accessory
group_10138	0	0	Accessory
group_10139	6	24	Accessory
group_1014	2	8	Accessory
group_10140	1	4	Accessory
group_10141	0	0	Accessory
group_10142	0	0	Accessory
group_10143	0	0	Accessory
group_10144	2	8	Accessory
group_10145	3	12	Accessory
group_10146	0	0	Accessory
group_10147	0	0	Accessory
group_10148	0	0	Accessory
group_10149	4	16	Accessory
group_1015	1	4	Accessory
group_10150	0	0	Accessory
group_10151	0	0	Accessory
group_10152	0	0	Accessory
group_10153	0	0	Accessory
group_10154	0	0	Accessory
group_10155	0	0	Accessory
group_10156	0	0	Accessory
group_10157	0	0	Accessory
group_10158	0	0	Accessory
group_10159	0	0	Accessory
group_1016	0	0	Accessory
group_10160	0	0	Accessory
group_10161	0	0	Accessory
group_10162	0	0	Accessory
group_10163	0	0	Accessory
group_10164	0	0	Accessory
group_10165	0	0	Accessory
group_10166	0	0	Accessory
group_10167	0	0	Accessory
group_10168	0	0	Accessory
group_10169	0	0	Accessory
group_1017	0	0	Accessory
group_10170	0	0	Accessory
group_10171	0	0	Accessory
group_10172	0	0	Accessory
group_10173	0	0	Accessory
group_10174	0	0	Accessory
group_10175	0	0	Accessory
group_10176	0	0	Accessory
group_10177	0	0	Accessory
group_10178	0	0	Accessory
group_10179	0	0	Accessory
group_1018	3	12	Accessory
group_10180	0	0	Accessory
group_10181	0	0	Accessory
group_10182	0	0	Accessory
group_10183	0	0	Accessory
group_10184	1	4	Accessory
group_10185	0	0	Accessory
group_10186	0	0	Accessory
group_10187	2	8	Accessory
group_10188	0	0	Accessory
group_10189	0	0	Accessory
group_1019	0	0	Accessory
group_10190	0	0	Accessory
group_10191	0	0	Accessory
group_10192	0	0	Accessory
group_10193	0	0	Accessory
group_10194	0	0	Accessory
group_10195	0	0	Accessory
group_10196	0	0	Accessory
group_10197	1	4	Accessory
group_10198	0	0	Accessory
group_10199	0	0	Accessory
group_102	0	0	Accessory
group_1020	0	0	Accessory
group_10200	0	0	Accessory
group_10201	0	0	Accessory
group_10202	0	0	Accessory
group_10203	2	8	Accessory
group_10204	1	4	Accessory
group_10205	0	0	Accessory
group_10206	0	0	Accessory
group_10207	0	0	Accessory
group_10208	0	0	Accessory
group_10209	0	0	Accessory
group_1021	0	0	Accessory
group_10210	0	0	Accessory
group_10211	0	0	Accessory
group_10212	0	0	Accessory
group_10213	0	0	Accessory
group_10214	0	0	Accessory
group_10215	0	0	Accessory
group_10216	0	0	Accessory
group_10217	0	0	Accessory
group_10218	1	4	Accessory
group_10219	0	0	Accessory
group_1022	25	100	Core
group_10220	2	8	Accessory
group_10221	0	0	Accessory
group_10222	0	0	Accessory
group_10223	0	0	Accessory
group_10224	0	0	Accessory
group_10225	0	0	Accessory
group_10226	0	0	Accessory
group_10227	0	0	Accessory
group_10228	1	4	Accessory
group_10229	0	0	Accessory
group_1023	0	0	Accessory
group_10230	2	8	Accessory
group_10231	3	12	Accessory
group_10232	0	0	Accessory
group_10233	0	0	Accessory
group_10234	0	0	Accessory
group_10235	0	0	Accessory
group_10236	2	8	Accessory
group_10237	1	4	Accessory
group_10238	0	0	Accessory
group_10239	1	4	Accessory
group_1024	0	0	Accessory
group_10240	1	4	Accessory
group_10241	0	0	Accessory
group_10242	0	0	Accessory
group_10243	0	0	Accessory
group_10244	0	0	Accessory
group_10245	1	4	Accessory
group_10246	0	0	Accessory
group_10247	0	0	Accessory
group_10248	0	0	Accessory
group_10249	0	0	Accessory
group_1025	0	0	Accessory
group_10250	0	0	Accessory
group_10251	0	0	Accessory
group_10252	0	0	Accessory
group_10253	0	0	Accessory
group_10254	1	4	Accessory
group_10255	0	0	Accessory
group_10256	0	0	Accessory
group_10257	1	4	Accessory
group_10258	0	0	Accessory
group_10259	0	0	Accessory
group_1026	1	4	Accessory
group_10260	0	0	Accessory
group_10261	0	0	Accessory
group_10262	0	0	Accessory
group_10263	0	0	Accessory
group_10264	0	0	Accessory
group_10265	0	0	Accessory
group_10266	0	0	Accessory
group_10267	0	0	Accessory
group_10268	0	0	Accessory
group_10269	0	0	Accessory
group_1027	0	0	Accessory
group_10270	0	0	Accessory
group_10271	0	0	Accessory
group_10272	0	0	Accessory
group_10273	0	0	Accessory
group_10274	0	0	Accessory
group_10275	0	0	Accessory
group_10276	0	0	Accessory
group_10277	0	0	Accessory
group_10278	0	0	Accessory
group_10279	0	0	Accessory
group_1028	0	0	Accessory
group_10280	0	0	Accessory
group_10281	0	0	Accessory
group_10282	0	0	Accessory
group_10283	0	0	Accessory
group_10284	0	0	Accessory
group_10285	0	0	Accessory
group_10286	0	0	Accessory
group_10287	0	0	Accessory
group_10288	0	0	Accessory
group_10289	0	0	Accessory
group_1029	0	0	Accessory
group_10290	0	0	Accessory
group_10291	0	0	Accessory
group_10292	0	0	Accessory
group_10293	0	0	Accessory
group_10294	0	0	Accessory
group_10295	0	0	Accessory
group_10296	0	0	Accessory
group_10297	0	0	Accessory
group_10298	0	0	Accessory
group_10299	0	0	Accessory
group_103	2	8	Accessory
group_1030	3	12	Accessory
group_10300	0	0	Accessory
group_10301	0	0	Accessory
group_10302	0	0	Accessory
group_10303	0	0	Accessory
group_10304	0	0	Accessory
group_10305	0	0	Accessory
group_10306	1	4	Accessory
group_10307	0	0	Accessory
group_10308	0	0	Accessory
group_10309	0	0	Accessory
group_1031	0	0	Accessory
group_10310	0	0	Accessory
group_10311	0	0	Accessory
group_10312	1	4	Accessory
group_10313	0	0	Accessory
group_10314	1	4	Accessory
group_10315	0	0	Accessory
group_10316	0	0	Accessory
group_10317	0	0	Accessory
group_10318	0	0	Accessory
group_10319	0	0	Accessory
group_1032	0	0	Accessory
group_10320	0	0	Accessory
group_10321	0	0	Accessory
group_10322	1	4	Accessory
group_10323	0	0	Accessory
group_10324	0	0	Accessory
group_10325	0	0	Accessory
group_10326	0	0	Accessory
group_10327	0	0	Accessory
group_10328	2	8	Accessory
group_10329	0	0	Accessory
group_1033	0	0	Accessory
group_10330	0	0	Accessory
group_10331	0	0	Accessory
group_10332	0	0	Accessory
group_10333	0	0	Accessory
group_10334	3	12	Accessory
group_10335	0	0	Accessory
group_10336	0	0	Accessory
group_10337	0	0	Accessory
group_10338	0	0	Accessory
group_10339	0	0	Accessory
group_1034	0	0	Accessory
group_10340	0	0	Accessory
group_10341	0	0	Accessory
group_10342	1	4	Accessory
group_10343	1	4	Accessory
group_10344	0	0	Accessory
group_10345	0	0	Accessory
group_10346	0	0	Accessory
group_10347	0	0	Accessory
group_10348	0	0	Accessory
group_10349	0	0	Accessory
group_1035	0	0	Accessory
group_10350	0	0	Accessory
group_10351	0	0	Accessory
group_10352	1	4	Accessory
group_10353	0	0	Accessory
group_10354	0	0	Accessory
group_10355	0	0	Accessory
group_10356	0	0	Accessory
group_10357	0	0	Accessory
group_10358	0	0	Accessory
group_10359	0	0	Accessory
group_1036	0	0	Accessory
group_10360	0	0	Accessory
group_10361	0	0	Accessory
group_10362	0	0	Accessory
group_10363	1	4	Accessory
group_10364	0	0	Accessory
group_10365	0	0	Accessory
group_10366	1	4	Accessory
group_10367	0	0	Accessory
group_10368	0	0	Accessory
group_10369	0	0	Accessory
group_1037	0	0	Accessory
group_10370	0	0	Accessory
group_10371	0	0	Accessory
group_10372	0	0	Accessory
group_10373	0	0	Accessory
group_10374	0	0	Accessory
group_10375	1	4	Accessory
group_10376	1	4	Accessory
group_10377	0	0	Accessory
group_10378	2	8	Accessory
group_10379	0	0	Accessory
group_1038	0	0	Accessory
group_10380	0	0	Accessory
group_10381	0	0	Accessory
group_10382	1	4	Accessory
group_10383	0	0	Accessory
group_10384	0	0	Accessory
group_10385	1	4	Accessory
group_10386	0	0	Accessory
group_10387	1	4	Accessory
group_10388	0	0	Accessory
group_10389	0	0	Accessory
group_1039	1	4	Accessory
group_10390	0	0	Accessory
group_10391	0	0	Accessory
group_10392	0	0	Accessory
group_10393	0	0	Accessory
group_10394	0	0	Accessory
group_10395	0	0	Accessory
group_10396	0	0	Accessory
group_10397	0	0	Accessory
group_10398	0	0	Accessory
group_10399	0	0	Accessory
group_104	0	0	Accessory
group_1040	0	0	Accessory
group_10400	0	0	Accessory
group_10401	1	4	Accessory
group_10402	0	0	Accessory
group_10403	0	0	Accessory
group_10404	0	0	Accessory
group_10405	0	0	Accessory
group_10406	0	0	Accessory
group_10407	0	0	Accessory
group_10408	0	0	Accessory
group_10409	1	4	Accessory
group_1041	0	0	Accessory
group_10410	0	0	Accessory
group_10411	1	4	Accessory
group_10412	1	4	Accessory
group_10413	0	0	Accessory
group_10414	0	0	Accessory
group_10415	1	4	Accessory
group_10416	0	0	Accessory
group_10417	0	0	Accessory
group_10418	0	0	Accessory
group_10419	0	0	Accessory
group_1042	1	4	Accessory
group_10420	0	0	Accessory
group_10421	0	0	Accessory
group_10422	0	0	Accessory
group_10423	0	0	Accessory
group_10424	0	0	Accessory
group_10425	0	0	Accessory
group_10426	1	4	Accessory
group_10427	0	0	Accessory
group_10428	0	0	Accessory
group_10429	0	0	Accessory
group_1043	0	0	Accessory
group_10430	0	0	Accessory
group_10431	0	0	Accessory
group_10432	0	0	Accessory
group_10433	0	0	Accessory
group_10434	0	0	Accessory
group_10435	0	0	Accessory
group_10436	0	0	Accessory
group_10437	0	0	Accessory
group_10438	0	0	Accessory
group_10439	0	0	Accessory
group_1044	1	4	Accessory
group_10440	0	0	Accessory
group_10441	0	0	Accessory
group_10442	0	0	Accessory
group_10443	0	0	Accessory
group_10444	0	0	Accessory
group_10445	0	0	Accessory
group_10446	0	0	Accessory
group_10447	0	0	Accessory
group_10448	0	0	Accessory
group_10449	0	0	Accessory
group_1045	0	0	Accessory
group_10450	0	0	Accessory
group_10451	0	0	Accessory
group_10452	0	0	Accessory
group_10453	0	0	Accessory
group_10454	1	4	Accessory
group_10455	0	0	Accessory
group_10456	0	0	Accessory
group_10457	0	0	Accessory
group_10458	0	0	Accessory
group_10459	0	0	Accessory
group_1046	0	0	Accessory
group_10460	0	0	Accessory
group_10461	0	0	Accessory
group_10462	0	0	Accessory
group_10463	0	0	Accessory
group_10464	0	0	Accessory
group_10465	0	0	Accessory
group_10466	0	0	Accessory
group_10467	0	0	Accessory
group_10468	1	4	Accessory
group_10469	0	0	Accessory
group_1047	1	4	Accessory
group_10470	0	0	Accessory
group_10471	0	0	Accessory
group_10472	0	0	Accessory
group_10473	0	0	Accessory
group_10474	0	0	Accessory
group_10475	0	0	Accessory
group_10476	0	0	Accessory
group_10477	0	0	Accessory
group_10478	0	0	Accessory
group_10479	1	4	Accessory
group_1048	0	0	Accessory
group_10480	1	4	Accessory
group_10481	1	4	Accessory
group_10482	0	0	Accessory
group_10483	0	0	Accessory
group_10484	0	0	Accessory
group_10485	0	0	Accessory
group_10486	0	0	Accessory
group_10487	0	0	Accessory
group_10488	1	4	Accessory
group_10489	0	0	Accessory
group_1049	0	0	Accessory
group_10490	0	0	Accessory
group_10491	0	0	Accessory
group_10492	0	0	Accessory
group_10493	0	0	Accessory
group_10494	0	0	Accessory
group_10495	0	0	Accessory
group_10496	0	0	Accessory
group_10497	0	0	Accessory
group_10498	3	12	Accessory
group_10499	1	4	Accessory
group_105	0	0	Accessory
group_1050	0	0	Accessory
group_10500	0	0	Accessory
group_10501	0	0	Accessory
group_10502	0	0	Accessory
group_10503	4	16	Accessory
group_10504	0	0	Accessory
group_10505	0	0	Accessory
group_10506	0	0	Accessory
group_10507	0	0	Accessory
group_10508	0	0	Accessory
group_10509	0	0	Accessory
group_1051	0	0	Accessory
group_10510	0	0	Accessory
group_10511	2	8	Accessory
group_10512	0	0	Accessory
group_10513	0	0	Accessory
group_10514	0	0	Accessory
group_10515	0	0	Accessory
group_10516	0	0	Accessory
group_10517	0	0	Accessory
group_10518	0	0	Accessory
group_10519	1	4	Accessory
group_1052	2	8	Accessory
group_10520	0	0	Accessory
group_10521	0	0	Accessory
group_10522	0	0	Accessory
group_10523	1	4	Accessory
group_10524	3	12	Accessory
group_10525	0	0	Accessory
group_10526	0	0	Accessory
group_10527	0	0	Accessory
group_10528	0	0	Accessory
group_10529	1	4	Accessory
group_1053	10	40	Accessory
group_10530	0	0	Accessory
group_10531	0	0	Accessory
group_10532	0	0	Accessory
group_10533	0	0	Accessory
group_10534	0	0	Accessory
group_10535	0	0	Accessory
group_10536	0	0	Accessory
group_10537	0	0	Accessory
group_10538	0	0	Accessory
group_10539	0	0	Accessory
group_1054	1	4	Accessory
group_10540	0	0	Accessory
group_10541	0	0	Accessory
group_10542	0	0	Accessory
group_10543	1	4	Accessory
group_10544	0	0	Accessory
group_10545	0	0	Accessory
group_10546	0	0	Accessory
group_10547	0	0	Accessory
group_10548	0	0	Accessory
group_10549	0	0	Accessory
group_1055	0	0	Accessory
group_10550	0	0	Accessory
group_10551	0	0	Accessory
group_10552	0	0	Accessory
group_10553	1	4	Accessory
group_10554	0	0	Accessory
group_10555	0	0	Accessory
group_10556	0	0	Accessory
group_10557	0	0	Accessory
group_10558	0	0	Accessory
group_10559	0	0	Accessory
group_1056	0	0	Accessory
group_10560	0	0	Accessory
group_10561	0	0	Accessory
group_10562	0	0	Accessory
group_10563	0	0	Accessory
group_10564	0	0	Accessory
group_10565	0	0	Accessory
group_10566	0	0	Accessory
group_10567	0	0	Accessory
group_10568	0	0	Accessory
group_10569	0	0	Accessory
group_1057	0	0	Accessory
group_10570	0	0	Accessory
group_10571	0	0	Accessory
group_10572	1	4	Accessory
group_10573	0	0	Accessory
group_10574	0	0	Accessory
group_10575	0	0	Accessory
group_10576	0	0	Accessory
group_10577	0	0	Accessory
group_10578	0	0	Accessory
group_10579	0	0	Accessory
group_1058	2	8	Accessory
group_10580	0	0	Accessory
group_10581	0	0	Accessory
group_10582	0	0	Accessory
group_10583	0	0	Accessory
group_10584	0	0	Accessory
group_10585	0	0	Accessory
group_10586	1	4	Accessory
group_10587	1	4	Accessory
group_10588	0	0	Accessory
group_10589	0	0	Accessory
group_1059	0	0	Accessory
group_10590	0	0	Accessory
group_10591	0	0	Accessory
group_10592	1	4	Accessory
group_10593	2	8	Accessory
group_10594	0	0	Accessory
group_10595	0	0	Accessory
group_10596	0	0	Accessory
group_10597	0	0	Accessory
group_10598	0	0	Accessory
group_10599	0	0	Accessory
group_106	0	0	Accessory
group_1060	0	0	Accessory
group_10600	0	0	Accessory
group_10601	0	0	Accessory
group_10602	0	0	Accessory
group_10603	0	0	Accessory
group_10604	0	0	Accessory
group_10605	0	0	Accessory
group_10606	1	4	Accessory
group_10607	0	0	Accessory
group_10608	0	0	Accessory
group_10609	0	0	Accessory
group_1061	0	0	Accessory
group_10610	0	0	Accessory
group_10611	0	0	Accessory
group_10612	0	0	Accessory
group_10613	0	0	Accessory
group_10614	0	0	Accessory
group_10615	0	0	Accessory
group_10616	1	4	Accessory
group_10617	0	0	Accessory
group_10618	0	0	Accessory
group_10619	0	0	Accessory
group_1062	0	0	Accessory
group_10620	0	0	Accessory
group_10621	0	0	Accessory
group_10622	0	0	Accessory
group_10623	0	0	Accessory
group_10624	0	0	Accessory
group_10625	0	0	Accessory
group_10626	0	0	Accessory
group_10627	0	0	Accessory
group_10628	0	0	Accessory
group_10629	0	0	Accessory
group_1063	0	0	Accessory
group_10630	0	0	Accessory
group_10631	0	0	Accessory
group_10632	1	4	Accessory
group_10633	1	4	Accessory
group_10634	1	4	Accessory
group_10635	0	0	Accessory
group_10636	0	0	Accessory
group_10637	0	0	Accessory
group_10638	0	0	Accessory
group_10639	0	0	Accessory
group_1064	0	0	Accessory
group_10640	0	0	Accessory
group_10641	0	0	Accessory
group_10642	0	0	Accessory
group_10643	0	0	Accessory
group_10644	0	0	Accessory
group_10645	0	0	Accessory
group_10646	0	0	Accessory
group_10647	0	0	Accessory
group_10648	1	4	Accessory
group_10649	1	4	Accessory
group_1065	1	4	Accessory
group_10650	0	0	Accessory
group_10651	0	0	Accessory
group_10652	1	4	Accessory
group_10653	0	0	Accessory
group_10654	0	0	Accessory
group_10655	0	0	Accessory
group_10656	0	0	Accessory
group_10657	0	0	Accessory
group_10658	0	0	Accessory
group_10659	0	0	Accessory
group_1066	1	4	Accessory
group_10660	0	0	Accessory
group_10661	0	0	Accessory
group_10662	0	0	Accessory
group_10663	0	0	Accessory
group_10664	1	4	Accessory
group_10665	0	0	Accessory
group_10666	0	0	Accessory
group_10667	0	0	Accessory
group_10668	0	0	Accessory
group_10669	0	0	Accessory
group_1067	1	4	Accessory
group_10670	0	0	Accessory
group_10671	0	0	Accessory
group_10672	1	4	Accessory
group_10673	0	0	Accessory
group_10674	0	0	Accessory
group_10675	0	0	Accessory
group_10676	0	0	Accessory
group_10677	0	0	Accessory
group_10678	0	0	Accessory
group_10679	2	8	Accessory
group_1068	0	0	Accessory
group_10680	0	0	Accessory
group_10681	0	0	Accessory
group_10682	1	4	Accessory
group_10683	0	0	Accessory
group_10684	0	0	Accessory
group_10685	0	0	Accessory
group_10686	0	0	Accessory
group_10687	0	0	Accessory
group_10688	0	0	Accessory
group_10689	0	0	Accessory
group_1069	0	0	Accessory
group_10690	0	0	Accessory
group_10691	0	0	Accessory
group_10692	0	0	Accessory
group_10693	0	0	Accessory
group_10694	1	4	Accessory
group_10695	0	0	Accessory
group_10696	1	4	Accessory
group_10697	0	0	Accessory
group_10698	0	0	Accessory
group_10699	0	0	Accessory
group_107	1	4	Accessory
group_1070	0	0	Accessory
group_10700	0	0	Accessory
group_10701	0	0	Accessory
group_10702	0	0	Accessory
group_10703	0	0	Accessory
group_10704	0	0	Accessory
group_10705	0	0	Accessory
group_10706	0	0	Accessory
group_10707	0	0	Accessory
group_10708	0	0	Accessory
group_10709	0	0	Accessory
group_1071	0	0	Accessory
group_10710	0	0	Accessory
group_10711	0	0	Accessory
group_10712	0	0	Accessory
group_10713	0	0	Accessory
group_10714	0	0	Accessory
group_10715	0	0	Accessory
group_10716	0	0	Accessory
group_10717	0	0	Accessory
group_10718	0	0	Accessory
group_10719	0	0	Accessory
group_1072	0	0	Accessory
group_10720	0	0	Accessory
group_10721	0	0	Accessory
group_10722	0	0	Accessory
group_10723	0	0	Accessory
group_10724	0	0	Accessory
group_10725	0	0	Accessory
group_10726	0	0	Accessory
group_10727	0	0	Accessory
group_10728	0	0	Accessory
group_10729	0	0	Accessory
group_1073	0	0	Accessory
group_10730	0	0	Accessory
group_10731	0	0	Accessory
group_10732	0	0	Accessory
group_10733	0	0	Accessory
group_10734	1	4	Accessory
group_10735	0	0	Accessory
group_10736	0	0	Accessory
group_10737	0	0	Accessory
group_10738	0	0	Accessory
group_10739	0	0	Accessory
group_1074	0	0	Accessory
group_10740	0	0	Accessory
group_10741	0	0	Accessory
group_10742	0	0	Accessory
group_10743	1	4	Accessory
group_10744	1	4	Accessory
group_10745	0	0	Accessory
group_10746	0	0	Accessory
group_10747	0	0	Accessory
group_10748	0	0	Accessory
group_10749	0	0	Accessory
group_1075	0	0	Accessory
group_10750	0	0	Accessory
group_10751	0	0	Accessory
group_10752	0	0	Accessory
group_10753	0	0	Accessory
group_10754	0	0	Accessory
group_10755	0	0	Accessory
group_10756	0	0	Accessory
group_10757	0	0	Accessory
group_10758	0	0	Accessory
group_10759	0	0	Accessory
group_1076	1	4	Accessory
group_10760	0	0	Accessory
group_10761	0	0	Accessory
group_10762	0	0	Accessory
group_10763	0	0	Accessory
group_10764	0	0	Accessory
group_10765	0	0	Accessory
group_10766	0	0	Accessory
group_10767	0	0	Accessory
group_10768	0	0	Accessory
group_10769	0	0	Accessory
group_1077	0	0	Accessory
group_10770	0	0	Accessory
group_10771	0	0	Accessory
group_10772	0	0	Accessory
group_10773	0	0	Accessory
group_10774	1	4	Accessory
group_10775	1	4	Accessory
group_10776	0	0	Accessory
group_10777	0	0	Accessory
group_10778	0	0	Accessory
group_10779	1	4	Accessory
group_1078	0	0	Accessory
group_10780	1	4	Accessory
group_10781	0	0	Accessory
group_10782	0	0	Accessory
group_10783	0	0	Accessory
group_10784	0	0	Accessory
group_10785	1	4	Accessory
group_10786	0	0	Accessory
group_10787	0	0	Accessory
group_10788	0	0	Accessory
group_10789	1	4	Accessory
group_1079	0	0	Accessory
group_10790	1	4	Accessory
group_10791	0	0	Accessory
group_10792	0	0	Accessory
group_10793	0	0	Accessory
group_10794	0	0	Accessory
group_10795	0	0	Accessory
group_10796	0	0	Accessory
group_10797	1	4	Accessory
group_10798	0	0	Accessory
group_10799	0	0	Accessory
group_108	0	0	Accessory
group_1080	0	0	Accessory
group_10800	0	0	Accessory
group_10801	0	0	Accessory
group_10802	0	0	Accessory
group_10803	0	0	Accessory
group_10804	0	0	Accessory
group_10805	0	0	Accessory
group_10806	0	0	Accessory
group_10807	0	0	Accessory
group_10808	0	0	Accessory
group_10809	0	0	Accessory
group_1081	2	8	Accessory
group_10810	0	0	Accessory
group_10811	0	0	Accessory
group_10812	0	0	Accessory
group_10813	0	0	Accessory
group_10814	0	0	Accessory
group_10815	0	0	Accessory
group_10816	0	0	Accessory
group_10817	0	0	Accessory
group_10818	0	0	Accessory
group_10819	0	0	Accessory
group_1082	0	0	Accessory
group_10820	0	0	Accessory
group_10821	0	0	Accessory
group_10822	0	0	Accessory
group_10823	0	0	Accessory
group_10824	0	0	Accessory
group_10825	0	0	Accessory
group_10826	0	0	Accessory
group_10827	0	0	Accessory
group_10828	0	0	Accessory
group_10829	1	4	Accessory
group_1083	0	0	Accessory
group_10830	0	0	Accessory
group_10831	0	0	Accessory
group_10832	0	0	Accessory
group_10833	0	0	Accessory
group_10834	0	0	Accessory
group_10835	0	0	Accessory
group_10836	0	0	Accessory
group_10837	3	12	Accessory
group_10838	0	0	Accessory
group_10839	1	4	Accessory
group_1084	0	0	Accessory
group_10840	0	0	Accessory
group_10841	0	0	Accessory
group_10842	0	0	Accessory
group_10843	0	0	Accessory
group_10844	0	0	Accessory
group_10845	0	0	Accessory
group_10846	0	0	Accessory
group_10847	0	0	Accessory
group_10848	0	0	Accessory
group_10849	0	0	Accessory
group_1085	0	0	Accessory
group_10850	0	0	Accessory
group_10851	1	4	Accessory
group_10852	1	4	Accessory
group_10853	0	0	Accessory
group_10854	0	0	Accessory
group_10855	0	0	Accessory
group_10856	0	0	Accessory
group_10857	0	0	Accessory
group_10858	0	0	Accessory
group_10859	0	0	Accessory
group_1086	0	0	Accessory
group_10860	0	0	Accessory
group_10861	0	0	Accessory
group_10862	0	0	Accessory
group_10863	0	0	Accessory
group_10864	1	4	Accessory
group_10865	0	0	Accessory
group_10866	1	4	Accessory
group_10867	0	0	Accessory
group_10868	0	0	Accessory
group_10869	1	4	Accessory
group_1087	0	0	Accessory
group_10870	1	4	Accessory
group_10871	0	0	Accessory
group_10872	0	0	Accessory
group_10873	0	0	Accessory
group_10874	0	0	Accessory
group_10875	0	0	Accessory
group_10876	0	0	Accessory
group_10877	0	0	Accessory
group_10878	0	0	Accessory
group_10879	0	0	Accessory
group_1088	2	8	Accessory
group_10880	0	0	Accessory
group_10881	0	0	Accessory
group_10882	0	0	Accessory
group_10883	0	0	Accessory
group_10884	0	0	Accessory
group_10885	0	0	Accessory
group_10886	0	0	Accessory
group_10887	0	0	Accessory
group_10888	0	0	Accessory
group_10889	0	0	Accessory
group_1089	0	0	Accessory
group_10890	0	0	Accessory
group_10891	0	0	Accessory
group_10892	1	4	Accessory
group_10893	1	4	Accessory
group_10894	0	0	Accessory
group_10895	0	0	Accessory
group_10896	0	0	Accessory
group_10897	0	0	Accessory
group_10898	1	4	Accessory
group_10899	0	0	Accessory
group_109	1	4	Accessory
group_1090	0	0	Accessory
group_10900	0	0	Accessory
group_10901	0	0	Accessory
group_10902	0	0	Accessory
group_10903	0	0	Accessory
group_10904	2	8	Accessory
group_10905	0	0	Accessory
group_10906	1	4	Accessory
group_10907	0	0	Accessory
group_10908	0	0	Accessory
group_10909	0	0	Accessory
group_1091	0	0	Accessory
group_10910	0	0	Accessory
group_10911	0	0	Accessory
group_10912	0	0	Accessory
group_10913	1	4	Accessory
group_10914	1	4	Accessory
group_10915	0	0	Accessory
group_10916	5	20	Accessory
group_10917	1	4	Accessory
group_10918	0	0	Accessory
group_10919	3	12	Accessory
group_1092	0	0	Accessory
group_10920	2	8	Accessory
group_10921	0	0	Accessory
group_10922	3	12	Accessory
group_10923	0	0	Accessory
group_10924	0	0	Accessory
group_10925	0	0	Accessory
group_10926	0	0	Accessory
group_10927	0	0	Accessory
group_10928	0	0	Accessory
group_10929	2	8	Accessory
group_1093	0	0	Accessory
group_10930	0	0	Accessory
group_10931	0	0	Accessory
group_10932	0	0	Accessory
group_10933	1	4	Accessory
group_10934	0	0	Accessory
group_10935	1	4	Accessory
group_10936	1	4	Accessory
group_10937	0	0	Accessory
group_10938	0	0	Accessory
group_10939	0	0	Accessory
group_1094	0	0	Accessory
group_10940	0	0	Accessory
group_10941	2	8	Accessory
group_10942	0	0	Accessory
group_10943	0	0	Accessory
group_10944	0	0	Accessory
group_10945	5	20	Accessory
group_10946	2	8	Accessory
group_10947	0	0	Accessory
group_10948	0	0	Accessory
group_10949	0	0	Accessory
group_1095	1	4	Accessory
group_10950	0	0	Accessory
group_10951	0	0	Accessory
group_10952	0	0	Accessory
group_10953	1	4	Accessory
group_10954	3	12	Accessory
group_10955	1	4	Accessory
group_10956	0	0	Accessory
group_10957	0	0	Accessory
group_10958	1	4	Accessory
group_10959	1	4	Accessory
group_1096	1	4	Accessory
group_10960	0	0	Accessory
group_10961	0	0	Accessory
group_10962	0	0	Accessory
group_10963	0	0	Accessory
group_10964	0	0	Accessory
group_10965	0	0	Accessory
group_10966	1	4	Accessory
group_10967	0	0	Accessory
group_10968	0	0	Accessory
group_10969	0	0	Accessory
group_1097	0	0	Accessory
group_10970	1	4	Accessory
group_10971	0	0	Accessory
group_10972	0	0	Accessory
group_10973	0	0	Accessory
group_10974	0	0	Accessory
group_10975	0	0	Accessory
group_10976	0	0	Accessory
group_10977	0	0	Accessory
group_10978	0	0	Accessory
group_10979	0	0	Accessory
group_1098	0	0	Accessory
group_10980	0	0	Accessory
group_10981	0	0	Accessory
group_10982	0	0	Accessory
group_10983	0	0	Accessory
group_10984	1	4	Accessory
group_10985	1	4	Accessory
group_10986	1	4	Accessory
group_10987	0	0	Accessory
group_10988	0	0	Accessory
group_10989	0	0	Accessory
group_1099	0	0	Accessory
group_10990	0	0	Accessory
group_10991	1	4	Accessory
group_10992	0	0	Accessory
group_10993	0	0	Accessory
group_10994	0	0	Accessory
group_10995	1	4	Accessory
group_10996	1	4	Accessory
group_10997	0	0	Accessory
group_10998	0	0	Accessory
group_10999	0	0	Accessory
group_11	1	4	Accessory
group_110	1	4	Accessory
group_1100	0	0	Accessory
group_11000	0	0	Accessory
group_11001	0	0	Accessory
group_11002	1	4	Accessory
group_11003	1	4	Accessory
group_11004	1	4	Accessory
group_11005	0	0	Accessory
group_11006	0	0	Accessory
group_11007	0	0	Accessory
group_11008	0	0	Accessory
group_11009	0	0	Accessory
group_1101	0	0	Accessory
group_11010	0	0	Accessory
group_11011	0	0	Accessory
group_11012	0	0	Accessory
group_11013	0	0	Accessory
group_11014	0	0	Accessory
group_11015	0	0	Accessory
group_11016	1	4	Accessory
group_11017	0	0	Accessory
group_11018	0	0	Accessory
group_11019	0	0	Accessory
group_1102	0	0	Accessory
group_11020	1	4	Accessory
group_11021	1	4	Accessory
group_11022	0	0	Accessory
group_11023	0	0	Accessory
group_11024	0	0	Accessory
group_11025	0	0	Accessory
group_11026	0	0	Accessory
group_11027	5	20	Accessory
group_11028	1	4	Accessory
group_11029	0	0	Accessory
group_1103	0	0	Accessory
group_11030	0	0	Accessory
group_11031	0	0	Accessory
group_11032	1	4	Accessory
group_11033	0	0	Accessory
group_11034	1	4	Accessory
group_11035	0	0	Accessory
group_11036	0	0	Accessory
group_11037	0	0	Accessory
group_11038	0	0	Accessory
group_11039	1	4	Accessory
group_1104	2	8	Accessory
group_11040	0	0	Accessory
group_11041	0	0	Accessory
group_11042	0	0	Accessory
group_11043	0	0	Accessory
group_11044	0	0	Accessory
group_11045	0	0	Accessory
group_11046	0	0	Accessory
group_11047	0	0	Accessory
group_11048	1	4	Accessory
group_11049	0	0	Accessory
group_1105	0	0	Accessory
group_11050	0	0	Accessory
group_11051	0	0	Accessory
group_11052	0	0	Accessory
group_11053	0	0	Accessory
group_11054	0	0	Accessory
group_11055	0	0	Accessory
group_11056	0	0	Accessory
group_11057	1	4	Accessory
group_11058	1	4	Accessory
group_11059	0	0	Accessory
group_1106	11	44	Accessory
group_11060	0	0	Accessory
group_11061	0	0	Accessory
group_11062	0	0	Accessory
group_11063	0	0	Accessory
group_11064	1	4	Accessory
group_11065	1	4	Accessory
group_11066	0	0	Accessory
group_11067	0	0	Accessory
group_11068	0	0	Accessory
group_11069	0	0	Accessory
group_1107	24	96	Accessory
group_11070	1	4	Accessory
group_11071	0	0	Accessory
group_11072	0	0	Accessory
group_11073	0	0	Accessory
group_11074	0	0	Accessory
group_11075	2	8	Accessory
group_11076	0	0	Accessory
group_11077	0	0	Accessory
group_11078	0	0	Accessory
group_11079	0	0	Accessory
group_1108	0	0	Accessory
group_11080	1	4	Accessory
group_11081	0	0	Accessory
group_11082	0	0	Accessory
group_11083	0	0	Accessory
group_11084	0	0	Accessory
group_11085	0	0	Accessory
group_11086	1	4	Accessory
group_11087	3	12	Accessory
group_11088	0	0	Accessory
group_11089	0	0	Accessory
group_1109	2	8	Accessory
group_11090	0	0	Accessory
group_11091	0	0	Accessory
group_11092	0	0	Accessory
group_11093	1	4	Accessory
group_11094	1	4	Accessory
group_11095	0	0	Accessory
group_11096	0	0	Accessory
group_11097	0	0	Accessory
group_11098	0	0	Accessory
group_11099	0	0	Accessory
group_111	0	0	Accessory
group_1110	2	8	Accessory
group_11100	0	0	Accessory
group_11101	0	0	Accessory
group_11102	1	4	Accessory
group_11103	1	4	Accessory
group_11104	0	0	Accessory
group_11105	0	0	Accessory
group_11106	3	12	Accessory
group_11107	0	0	Accessory
group_11108	0	0	Accessory
group_11109	0	0	Accessory
group_1111	13	52	Accessory
group_11110	1	4	Accessory
group_11111	1	4	Accessory
group_11112	0	0	Accessory
group_11113	0	0	Accessory
group_11114	0	0	Accessory
group_11115	0	0	Accessory
group_11116	3	12	Accessory
[truncated: 23,138 more rows]

## Sheet: Cluster 5
Supplementary Table 8: Core and accessory genes identified in Cluster 5
Gene	n_present	core_percentage	gene_type
aCT	10	100	Core
aF0785	7	70	Accessory
aF2118	1	10	Accessory
aIM24	10	100	Core
aRA1	0	0	Accessory
aRO8	0	0	Accessory
aac6	0	0	Accessory
aarF	0	0	Accessory
abcX	0	0	Accessory
abcf	10	100	Core
abgB	0	0	Accessory
abiF	0	0	Accessory
abiH	0	0	Accessory
abiV	0	0	Accessory
abpA	0	0	Accessory
abrB	1	10	Accessory
accA	10	100	Core
accB	10	100	Core
accC	8	80	Accessory
accD	9	90	Accessory
aceF	10	100	Core
ackA	9	90	Accessory
acm	0	0	Accessory
acnA	0	0	Accessory
acoA	0	0	Accessory
acoA~~~pdhA	10	100	Core
acoB	10	100	Core
acpA	7	70	Accessory
acpA~~~acpB	0	0	Accessory
acpB	0	0	Accessory
acpP	0	0	Accessory
acpS	1	10	Accessory
acrA	0	0	Accessory
acrIIA6	0	0	Accessory
acrR	0	0	Accessory
acrR~~~tetR	3	30	Accessory
acuB	0	0	Accessory
acuB~~~cBS	9	90	Accessory
acuI~~~yhfP	9	90	Accessory
acyP	1	10	Accessory
adaA	0	0	Accessory
adaB	0	0	Accessory
adcA	0	0	Accessory
adcC	0	0	Accessory
add	0	0	Accessory
addA	0	0	Accessory
adhE	0	0	Accessory
adhP	8	80	Accessory
adk	2	20	Accessory
aes	0	0	Accessory
afuA	0	0	Accessory
afuC	0	0	Accessory
aga	0	0	Accessory
agaB	4	40	Accessory
agaS	4	40	Accessory
agrC	0	0	Accessory
aguA	0	0	Accessory
aguB	0	0	Accessory
ahpC	0	0	Accessory
ahpF	0	0	Accessory
alaS	0	0	Accessory
albA	0	0	Accessory
albE~~~pqqL	0	0	Accessory
albF	10	100	Core
albF~~~pqqL	0	0	Accessory
ald	10	100	Core
aliA	0	0	Accessory
aliA~~~sarA~~~oppA	8	80	Accessory
alkD	0	0	Accessory
alpA	2	20	Accessory
alr	0	0	Accessory
alr~~~acpS	9	90	Accessory
alsS	0	0	Accessory
alsT	0	0	Accessory
alwI	0	0	Accessory
amaP	2	20	Accessory
amiA	2	20	Accessory
amiF~~~oppF	10	100	Core
ampC	0	0	Accessory
ampH	1	10	Accessory
ampH~~~ampC	0	0	Accessory
ampS~~~pepS	10	100	Core
amrA	3	30	Accessory
amsE	0	0	Accessory
amt	0	0	Accessory
amtB	0	0	Accessory
amyA	8	80	Accessory
ansA	0	0	Accessory
ansP	0	0	Accessory
ant6	10	100	Core
apbE	0	0	Accessory
apeA	1	10	Accessory
aph3IIIa	0	0	Accessory
aprE	0	0	Accessory
apt	10	100	Core
araC	0	0	Accessory
araC~~~tetD	8	80	Accessory
araD	0	0	Accessory
araJ	0	0	Accessory
araQ	0	0	Accessory
araQ~~~ugpE	0	0	Accessory
arcA	10	100	Core
arcC	10	100	Core
arcR	10	100	Core
arcT	0	0	Accessory
ardA	0	0	Accessory
argA~~~ywnH	3	30	Accessory
argB	0	0	Accessory
argC	0	0	Accessory
argD	0	0	Accessory
argE	10	100	Core
argF	8	80	Accessory
argG	9	90	Accessory
argH	9	90	Accessory
argJ	0	0	Accessory
argR	0	0	Accessory
argS	10	100	Core
arlR	9	90	Accessory
arlR~~~csrR~~~ompR	10	100	Core
aroA	6	60	Accessory
aroB	0	0	Accessory
aroB~~~aroE	9	90	Accessory
aroC	9	90	Accessory
aroD	9	90	Accessory
aroE	0	0	Accessory
aroG1	9	90	Accessory
aroK	0	0	Accessory
arpU	0	0	Accessory
arsC	0	0	Accessory
arsC~~~adaB	0	0	Accessory
arsR	0	0	Accessory
artM	2	20	Accessory
asbA	7	70	Accessory
ascB	0	0	Accessory
asd	9	90	Accessory
asnA	0	0	Accessory
asnS	10	100	Core
asp1	0	0	Accessory
asp2	0	0	Accessory
asp3	0	0	Accessory
asp4	8	80	Accessory
asp5	6	60	Accessory
aspB	8	80	Accessory
aspB~~~alaT	10	100	Core
aspS	0	0	Accessory
atoS	1	10	Accessory
atpA	10	100	Core
atpB	10	100	Core
atpC	10	100	Core
atpD	10	100	Core
atpE	0	0	Accessory
atpF	10	100	Core
atpG	10	100	Core
atpH	0	0	Accessory
avrD	0	0	Accessory
axe1	2	20	Accessory
azlC	0	0	Accessory
azlC~~~ygaZ	0	0	Accessory
azlD	10	100	Core
azlD2	0	0	Accessory
baeS	0	0	Accessory
bcc	0	0	Accessory
bceA	1	10	Accessory
bceB	0	0	Accessory
bceB~~~yxdM	9	90	Accessory
bcrC	0	0	Accessory
bcsA	0	0	Accessory
bcsZ	0	0	Accessory
beeE	0	0	Accessory
bepR	5	50	Accessory
bet	1	10	Accessory
betI~~~tetR	0	0	Accessory
bglB	5	50	Accessory
bglB~~~gmuD~~~bglA	6	60	Accessory
bglG	0	0	Accessory
bglG~~~licT	8	80	Accessory
bglH	0	0	Accessory
bgrS	0	0	Accessory
bhtF	0	0	Accessory
bigG	4	40	Accessory
bioF	0	0	Accessory
bioH	0	0	Accessory
bioY	0	0	Accessory
birA	0	0	Accessory
blaR1	9	90	Accessory
blpA	0	0	Accessory
blpC	0	0	Accessory
blpI	0	0	Accessory
blpJ	0	0	Accessory
blpL	0	0	Accessory
blpM	0	0	Accessory
blpO	0	0	Accessory
blpP	0	0	Accessory
blpR	0	0	Accessory
blpS~~~lytR~~~lytT	0	0	Accessory
blpT	0	0	Accessory
blpX	0	0	Accessory
blpY	0	0	Accessory
blpZ	0	0	Accessory
bofA	1	10	Accessory
briC	0	0	Accessory
brkB	0	0	Accessory
brkB~~~yihY	0	0	Accessory
brnQ	10	100	Core
brpA	0	0	Accessory
btuD	0	0	Accessory
btuE	0	0	Accessory
budA	10	100	Core
cDA1	0	0	Accessory
cadA	0	0	Accessory
cadD	8	80	Accessory
cadX	3	30	Accessory
caiA	0	0	Accessory
caiD~~~fabM	10	100	Core
capA	7	70	Accessory
capD	3	30	Accessory
carA	9	90	Accessory
carB	0	0	Accessory
cas1	4	40	Accessory
cas10	0	0	Accessory
cas1c	1	10	Accessory
cas2	4	40	Accessory
cas3	1	10	Accessory
cas4	1	10	Accessory
cas5c	1	10	Accessory
cas6	2	20	Accessory
cas7c	1	10	Accessory
cas8c	1	10	Accessory
cas9	0	0	Accessory
catE	0	0	Accessory
cbbX	0	0	Accessory
cbiA	2	20	Accessory
cbiB	0	0	Accessory
cbiC	2	20	Accessory
cbiD	2	20	Accessory
cbiE	0	0	Accessory
cbiF	2	20	Accessory
cbiG	0	0	Accessory
cbiM	2	20	Accessory
cbiN	2	20	Accessory
cbiO	0	0	Accessory
cbiQ	0	0	Accessory
cbiT	2	20	Accessory
cbpB	8	80	Accessory
cbpC	0	0	Accessory
cbpD	0	0	Accessory
cbpD2	0	0	Accessory
cbpE	0	0	Accessory
cbpF~~~cbpJ	0	0	Accessory
cbpI	0	0	Accessory
cbrC	0	0	Accessory
cca	10	100	Core
ccc1	10	100	Core
ccdA	0	0	Accessory
ccdA2	0	0	Accessory
ccdA2~~~ccdA	9	90	Accessory
ccmA	0	0	Accessory
ccmD	0	0	Accessory
ccmE	0	0	Accessory
ccmK	0	0	Accessory
ccoS	0	0	Accessory
ccpA	0	0	Accessory
ccpA~~~lacI	10	100	Core
ccpN	9	90	Accessory
ccrZ	0	0	Accessory
cdaA	10	100	Core
cdaR~~~ybbR	0	0	Accessory
cdd	10	100	Core
cdiI	0	0	Accessory
cdsA	10	100	Core
celA	4	40	Accessory
celA~~~comEA	0	0	Accessory
celB	0	0	Accessory
celB~~~comEC	0	0	Accessory
celC	4	40	Accessory
celC~~~bigG	5	50	Accessory
ceuA	0	0	Accessory
ceuB	0	0	Accessory
ceuC	0	0	Accessory
ceuD	0	0	Accessory
chaP	0	0	Accessory
ciaH~~~baeS	8	80	Accessory
ciaR	2	20	Accessory
cibA	0	0	Accessory
cibB	0	0	Accessory
cinA	10	100	Core
citA	0	0	Accessory
citB	0	0	Accessory
citB~~~luxR~~~degU	10	100	Core
citC	0	0	Accessory
citD	0	0	Accessory
citE	0	0	Accessory
citF	0	0	Accessory
citG	0	0	Accessory
citM	0	0	Accessory
citS	0	0	Accessory
citS~~~yesM	0	0	Accessory
citX	0	0	Accessory
citZ	0	0	Accessory
clcA	10	100	Core
clcB	0	0	Accessory
clpA	0	0	Accessory
clpA~~~clpC	9	90	Accessory
clpA~~~clpE	9	90	Accessory
clpB	0	0	Accessory
clpC	0	0	Accessory
clpC1	2	20	Accessory
clpE	0	0	Accessory
clpL	0	0	Accessory
clpL~~~clpA	10	100	Core
clpP	10	100	Core
clpX	10	100	Core
cls	10	100	Core
cmk	10	100	Core
cmr4	1	10	Accessory
coaA	10	100	Core
coaB	9	90	Accessory
coaC	9	90	Accessory
coaD	10	100	Core
coaE	10	100	Core
cobA	0	0	Accessory
cobB	0	0	Accessory
cobD	0	0	Accessory
cobI	0	0	Accessory
cobJ	2	20	Accessory
cobK	0	0	Accessory
cobN	0	0	Accessory
cobQ	2	20	Accessory
cobQ~~~gatD	10	100	Core
cobS	0	0	Accessory
cobT	0	0	Accessory
cobU	0	0	Accessory
codY	10	100	Core
cof	0	0	Accessory
cofD	0	0	Accessory
cof~~~ybjI	10	100	Core
coiA	0	0	Accessory
coiA~~~prsA	0	0	Accessory
comA	7	70	Accessory
comA~~~pncF	0	0	Accessory
comB	6	60	Accessory
comC	2	20	Accessory
comD	0	0	Accessory
comD~~~natK	2	20	Accessory
comD~~~yesM~~~dcuS	0	0	Accessory
comE	6	60	Accessory
comEA	0	0	Accessory
comEB	0	0	Accessory
comEC	0	0	Accessory
comE~~~comEB	10	100	Core
comF	0	0	Accessory
comFA	0	0	Accessory
comFA~~~comF	0	0	Accessory
comFC	0	0	Accessory
comF~~~comFC	0	0	Accessory
comF~~~recG~~~comFA	0	0	Accessory
comGA	2	20	Accessory
comGA~~~comGB	0	0	Accessory
comGB	1	10	Accessory
comGC	0	0	Accessory
comGD	0	0	Accessory
comGE	0	0	Accessory
comGF	1	10	Accessory
comGF~~~comGG	0	0	Accessory
comGG	1	10	Accessory
comM	0	0	Accessory
comP	0	0	Accessory
comR	0	0	Accessory
comR1	0	0	Accessory
comW	1	10	Accessory
comX	1	10	Accessory
comX1	0	0	Accessory
comX1~~~comX	0	0	Accessory
comX2	0	0	Accessory
comX2~~~comX1	0	0	Accessory
copG	5	50	Accessory
copY	0	0	Accessory
copZ	0	0	Accessory
corA	10	100	Core
cotH	6	60	Accessory
cotS	0	0	Accessory
cotS~~~licA	0	0	Accessory
cpdA	0	0	Accessory
cpdB	3	30	Accessory
cpoA	0	0	Accessory
cppA	0	0	Accessory
cps2a	0	0	Accessory
cps4B	0	0	Accessory
cpsC	0	0	Accessory
cpsD	0	0	Accessory
cpsD~~~mrp	3	30	Accessory
cpsE~~~wcaJ~~~epsL	7	70	Accessory
cpsI	0	0	Accessory
cpsJ	0	0	Accessory
cpsL	0	0	Accessory
cpsO~~~epsJ	1	10	Accessory
crcB	0	0	Accessory
crcB~~~fluC	0	0	Accessory
crp	0	0	Accessory
csbD	8	80	Accessory
cshA	0	0	Accessory
cshA~~~srmB	10	100	Core
cshA~~~srmB~~~yfmL	2	20	Accessory
cshB	0	0	Accessory
cshB~~~srmB	10	100	Core
csm2	0	0	Accessory
csm3	0	0	Accessory
csm4	0	0	Accessory
csm5	0	0	Accessory
csm6	0	0	Accessory
csn2	5	50	Accessory
csoR	1	10	Accessory
ctpA	3	30	Accessory
ctsR	9	90	Accessory
cutC	1	10	Accessory
cutD	1	10	Accessory
cvfB	10	100	Core
cvpA	4	40	Accessory
cwlA	0	0	Accessory
cwlO	8	80	Accessory
cydC	1	10	Accessory
cydD	1	10	Accessory
cylB	6	60	Accessory
cynT	10	100	Core
cynX	0	0	Accessory
cysA	0	0	Accessory
cysB	1	10	Accessory
cysE	0	0	Accessory
cysE~~~epsC~~~rimI	10	100	Core
cysK	0	0	Accessory
cysS	10	100	Core
czcD	3	30	Accessory
dAP2	0	0	Accessory
dLH	0	0	Accessory
dacC	0	0	Accessory
dadA	0	0	Accessory
dam	0	0	Accessory
dapA	9	90	Accessory
dapB	10	100	Core
dapD	10	100	Core
darT	2	20	Accessory
dcm	0	0	Accessory
ddl	0	0	Accessory
dedA	0	0	Accessory
def	9	90	Accessory
degA	3	30	Accessory
degP	4	40	Accessory
degV	10	100	Core
degV~~~trmH	10	100	Core
deoB	10	100	Core
deoC	10	100	Core
deoD	10	100	Core
deoR	0	0	Accessory
deoR~~~glpR	10	100	Core
deoR~~~ulaR~~~glpR	4	40	Accessory
der	0	0	Accessory
dexB	0	0	Accessory
dgkA	10	100	Core
dhaK	3	30	Accessory
dhaK~~~dhaQ	0	0	Accessory
dhaL	3	30	Accessory
dhaM	0	0	Accessory
dhaQ	0	0	Accessory
dhaS	0	0	Accessory
dhfR	0	0	Accessory
dicA	1	10	Accessory
dinB	10	100	Core
dinD	0	0	Accessory
dinF	2	20	Accessory
dinG	0	0	Accessory
divIB	6	60	Accessory
divIVA	9	90	Accessory
dltA	0	0	Accessory
dltB	0	0	Accessory
dltC	0	0	Accessory
dltD	0	0	Accessory
dltR	1	10	Accessory
dnaA	4	40	Accessory
dnaB	0	0	Accessory
dnaB~~~dnaD	0	0	Accessory
dnaC	0	0	Accessory
dnaD	10	100	Core
dnaE	0	0	Accessory
dnaG	0	0	Accessory
dnaI	10	100	Core
dnaJ	3	30	Accessory
dnaK	10	100	Core
dnaN	4	40	Accessory
dnaQ	0	0	Accessory
dnaQ~~~dinG~~~polC	0	0	Accessory
dnaQ~~~polC	0	0	Accessory
dnaX	1	10	Accessory
doc	1	10	Accessory
dpiB	4	40	Accessory
dpnA	0	0	Accessory
dpnD	0	0	Accessory
dpnI	10	100	Core
dpnM	0	0	Accessory
dppB	0	0	Accessory
dppC	0	0	Accessory
dppD	0	0	Accessory
dprA	10	100	Core
dps	9	90	Accessory
draG	4	40	Accessory
drrA	2	20	Accessory
drrB	5	50	Accessory
dsbD	0	0	Accessory
dtd	9	90	Accessory
dusB	9	90	Accessory
dut	10	100	Core
eCFS	8	80	Accessory
eMAP	10	100	Core
eRG12	0	0	Accessory
eamA	0	0	Accessory
eamA~~~rhaT	0	0	Accessory
eamA~~~yicL	9	90	Accessory
ebgC	0	0	Accessory
ebhA	4	40	Accessory
ebsA	10	100	Core
ebsC	9	90	Accessory
ecfA1	10	100	Core
ecfA2	10	100	Core
ecfT	10	100	Core
ecfT~~~mtsC~~~cbiQ	10	100	Core
ecsA~~~ccmA	0	0	Accessory
ecsB	1	10	Accessory
ecsC	0	0	Accessory
eda	0	0	Accessory
efeB	10	100	Core
efeO	10	100	Core
efeU	10	100	Core
efiE	0	0	Accessory
efp	9	90	Accessory
egtUA	9	90	Accessory
egtUBC	9	90	Accessory
ehuA	0	0	Accessory
elaA	2	20	Accessory
elaC	0	0	Accessory
elsH	0	0	Accessory
elyC	0	0	Accessory
endA	10	100	Core
engA	0	0	Accessory
eno	0	0	Accessory
entS	10	100	Core
epsA	0	0	Accessory
epsB	0	0	Accessory
epsE	6	60	Accessory
epsF	0	0	Accessory
epsG	0	0	Accessory
epsH	0	0	Accessory
epsJ	0	0	Accessory
epsJ~~~wcaA	0	0	Accessory
epsL	0	0	Accessory
epsN	0	0	Accessory
epsV	0	0	Accessory
epuA	0	0	Accessory
era	10	100	Core
eriC	0	0	Accessory
ermB	3	30	Accessory
ermL~~~ermC	3	30	Accessory
esaA	0	0	Accessory
esaC	1	10	Accessory
escB	1	10	Accessory
essA	0	0	Accessory
essB	3	30	Accessory
essC	4	40	Accessory
essC~~~ftsK	0	0	Accessory
esxA	0	0	Accessory
eutA	2	20	Accessory
eutC	0	0	Accessory
eutD	2	20	Accessory
eutH	0	0	Accessory
eutJ	1	10	Accessory
eutL	2	20	Accessory
eutM	1	10	Accessory
eutN	1	10	Accessory
eutP	0	0	Accessory
eutQ	1	10	Accessory
exoY~~~wcaJ	0	0	Accessory
exp7~~~mgtA	1	10	Accessory
exp8	0	0	Accessory
ezrA	10	100	Core
fAU1	0	0	Accessory
fIDO	0	0	Accessory
fMR2	6	60	Accessory
fabD	0	0	Accessory
fabF	10	100	Core
fabG	10	100	Core
fabH	10	100	Core
fabK	10	100	Core
fabM	0	0	Accessory
fabZ	10	100	Core
fabZ~~~fatA	0	0	Accessory
fabZ~~~paaI	8	80	Accessory
fabZ~~~spxR	0	0	Accessory
fadH2	0	0	Accessory
fadM	0	0	Accessory
fasA	0	0	Accessory
fatA	0	0	Accessory
fba	10	100	Core
fbp	8	80	Accessory
fbpA	1	10	Accessory
fbpB	0	0	Accessory
fctA	0	0	Accessory
femA	0	0	Accessory
femA~~~murN	10	100	Core
femB~~~fmhB	0	0	Accessory
feoA	0	0	Accessory
feoB	0	0	Accessory
fer	0	0	Accessory
ffh	10	100	Core
fghA	0	0	Accessory
fhs	0	0	Accessory
fhs1	10	100	Core
fhs~~~fhs2	9	90	Accessory
fibA	8	80	Accessory
fieF	0	0	Accessory
fieF~~~mntE	0	0	Accessory
fimA	1	10	Accessory
fimB	0	0	Accessory
fimC	1	10	Accessory
flaA1	0	0	Accessory
fldA	10	100	Core
flgJ	0	0	Accessory
flgM	0	0	Accessory
fliA	0	0	Accessory
fliJ	2	20	Accessory
fliK	1	10	Accessory
fliS	0	0	Accessory
fmhB	0	0	Accessory
fmnP	0	0	Accessory
fmt	0	0	Accessory
fmtA	1	10	Accessory
fni	0	0	Accessory
focA	10	100	Core
folA	0	0	Accessory
folB	0	0	Accessory
folC	4	40	Accessory
folD	9	90	Accessory
folE	4	40	Accessory
folK	10	100	Core
folK~~~folB	0	0	Accessory
folP	10	100	Core
folT	0	0	Accessory
frmA	0	0	Accessory
frmB	4	40	Accessory
frr	10	100	Core
fruA	0	0	Accessory
fruA~~~luxR	9	90	Accessory
frvX	2	20	Accessory
fsa	4	40	Accessory
fszA	0	0	Accessory
ftcD	10	100	Core
ftf	0	0	Accessory
ftsA	0	0	Accessory
ftsB	0	0	Accessory
ftsE	0	0	Accessory
ftsH	10	100	Core
ftsJ	0	0	Accessory
ftsK	0	0	Accessory
ftsL	0	0	Accessory
ftsQ	0	0	Accessory
ftsW	0	0	Accessory
ftsX	0	0	Accessory
ftsY	10	100	Core
ftsZ	9	90	Accessory
ftsZ~~~murF	0	0	Accessory
fucI	1	10	Accessory
fucO	0	0	Accessory
fucO~~~gldA	1	10	Accessory
funZ	0	0	Accessory
fur	0	0	Accessory
fusA	0	0	Accessory
galA	3	30	Accessory
galE	6	60	Accessory
galK	0	0	Accessory
galM	4	40	Accessory
galR	0	0	Accessory
galT	0	0	Accessory
galT2~~~galT	10	100	Core
galU	10	100	Core
ganA	4	40	Accessory
gap	0	0	Accessory
gapN	0	0	Accessory
gatA	10	100	Core
gatB	10	100	Core
gatC	10	100	Core
gbpC	0	0	Accessory
gdhA	10	100	Core
gdmH	0	0	Accessory
gdpP	10	100	Core
gldA	4	40	Accessory
glf	0	0	Accessory
glgA	10	100	Core
glgB	10	100	Core
glgC	10	100	Core
glgD	10	100	Core
glgP	10	100	Core
glmM	10	100	Core
glmS	10	100	Core
glmU	10	100	Core
glnA	9	90	Accessory
glnH	2	20	Accessory
glnK	0	0	Accessory
glnQ	2	20	Accessory
glnQ~~~artM	10	100	Core
glnQ~~~yxeN	10	100	Core
glnR	0	0	Accessory
glnR~~~merR	2	20	Accessory
gloA	0	0	Accessory
gloB	9	90	Accessory
gloB~~~yqgX	0	0	Accessory
glpE	0	0	Accessory
glpE~~~moeZ~~~pspE	10	100	Core
glpF	7	70	Accessory
glpG	0	0	Accessory
glpK	0	0	Accessory
glpO	0	0	Accessory
glpR	0	0	Accessory
gltA	0	0	Accessory
gltB	0	0	Accessory
gltC	1	10	Accessory
gltD	0	0	Accessory
gltX	0	0	Accessory
gluP	0	0	Accessory
glvR	1	10	Accessory
glxK	0	0	Accessory
gly	8	80	Accessory
glyA	10	100	Core
glyE	0	0	Accessory
glyG	0	0	Accessory
glyP~~~alsT	3	30	Accessory
glyQ	10	100	Core
glyS	0	0	Accessory
gmk	0	0	Accessory
gmuD	0	0	Accessory
gndA	10	100	Core
gntR	2	20	Accessory
gntR~~~aRO8	0	0	Accessory
gntR~~~ubiC	4	40	Accessory
gntR~~~ytrA~~~yhcF	0	0	Accessory
gntR~~~yvoA~~~mngR	10	100	Core
gntX	0	0	Accessory
gor	0	0	Accessory
gorA	9	90	Accessory
gph	0	0	Accessory
gpmA	10	100	Core
gpmB2	10	100	Core
gpsA	10	100	Core
gpsB	0	0	Accessory
greA	0	0	Accessory
groES	10	100	Core
groL	10	100	Core
group_0	0	0	Accessory
group_1	1	10	Accessory
group_10	0	0	Accessory
group_100	8	80	Accessory
group_1000	7	70	Accessory
group_10000	0	0	Accessory
group_10001	0	0	Accessory
group_10002	0	0	Accessory
group_10003	1	10	Accessory
group_10004	1	10	Accessory
group_10005	0	0	Accessory
group_10006	0	0	Accessory
group_10007	0	0	Accessory
group_10008	0	0	Accessory
group_10009	0	0	Accessory
group_1001	0	0	Accessory
group_10010	0	0	Accessory
group_10011	0	0	Accessory
group_10012	0	0	Accessory
group_10013	0	0	Accessory
group_10014	1	10	Accessory
group_10015	0	0	Accessory
group_10016	0	0	Accessory
group_10017	0	0	Accessory
group_10018	0	0	Accessory
group_10019	0	0	Accessory
group_1002	0	0	Accessory
group_10020	0	0	Accessory
group_10021	1	10	Accessory
group_10022	0	0	Accessory
group_10023	0	0	Accessory
group_10024	0	0	Accessory
group_10025	0	0	Accessory
group_10026	0	0	Accessory
group_10027	0	0	Accessory
group_10028	0	0	Accessory
group_10029	0	0	Accessory
group_1003	0	0	Accessory
group_10030	1	10	Accessory
group_10031	0	0	Accessory
group_10032	0	0	Accessory
group_10033	1	10	Accessory
group_10034	2	20	Accessory
group_10035	1	10	Accessory
group_10036	0	0	Accessory
group_10037	0	0	Accessory
group_10038	0	0	Accessory
group_10039	0	0	Accessory
group_1004	0	0	Accessory
group_10040	0	0	Accessory
group_10041	6	60	Accessory
group_10042	0	0	Accessory
group_10043	0	0	Accessory
group_10044	0	0	Accessory
group_10045	0	0	Accessory
group_10046	0	0	Accessory
group_10047	0	0	Accessory
group_10048	1	10	Accessory
group_10049	0	0	Accessory
group_1005	0	0	Accessory
group_10050	0	0	Accessory
group_10051	0	0	Accessory
group_10052	0	0	Accessory
group_10053	0	0	Accessory
group_10054	0	0	Accessory
group_10055	0	0	Accessory
group_10056	0	0	Accessory
group_10057	0	0	Accessory
group_10058	0	0	Accessory
group_10059	0	0	Accessory
group_1006	0	0	Accessory
group_10060	2	20	Accessory
group_10061	0	0	Accessory
group_10062	0	0	Accessory
group_10063	0	0	Accessory
group_10064	0	0	Accessory
group_10065	0	0	Accessory
group_10066	0	0	Accessory
group_10067	1	10	Accessory
group_10068	0	0	Accessory
group_10069	0	0	Accessory
group_1007	0	0	Accessory
group_10070	1	10	Accessory
group_10071	1	10	Accessory
group_10072	0	0	Accessory
group_10073	0	0	Accessory
group_10074	0	0	Accessory
group_10075	0	0	Accessory
group_10076	0	0	Accessory
group_10077	0	0	Accessory
group_10078	0	0	Accessory
group_10079	1	10	Accessory
group_1008	0	0	Accessory
group_10080	0	0	Accessory
group_10081	0	0	Accessory
group_10082	0	0	Accessory
group_10083	0	0	Accessory
group_10084	0	0	Accessory
group_10085	0	0	Accessory
group_10086	0	0	Accessory
group_10087	0	0	Accessory
group_10088	0	0	Accessory
group_10089	0	0	Accessory
group_1009	10	100	Core
group_10090	0	0	Accessory
group_10091	0	0	Accessory
group_10092	0	0	Accessory
group_10093	0	0	Accessory
group_10094	0	0	Accessory
group_10095	0	0	Accessory
group_10096	0	0	Accessory
group_10097	0	0	Accessory
group_10098	0	0	Accessory
group_10099	0	0	Accessory
group_101	0	0	Accessory
group_1010	1	10	Accessory
group_10100	0	0	Accessory
group_10101	0	0	Accessory
group_10102	1	10	Accessory
group_10103	0	0	Accessory
group_10104	0	0	Accessory
group_10105	0	0	Accessory
group_10106	1	10	Accessory
group_10107	0	0	Accessory
group_10108	0	0	Accessory
group_10109	0	0	Accessory
group_1011	0	0	Accessory
group_10110	0	0	Accessory
group_10111	0	0	Accessory
group_10112	6	60	Accessory
group_10113	0	0	Accessory
group_10114	0	0	Accessory
group_10115	0	0	Accessory
group_10116	0	0	Accessory
group_10117	1	10	Accessory
group_10118	0	0	Accessory
group_10119	0	0	Accessory
group_1012	0	0	Accessory
group_10120	0	0	Accessory
group_10121	0	0	Accessory
group_10122	0	0	Accessory
group_10123	1	10	Accessory
group_10124	0	0	Accessory
group_10125	0	0	Accessory
group_10126	0	0	Accessory
group_10127	0	0	Accessory
group_10128	0	0	Accessory
group_10129	0	0	Accessory
group_1013	0	0	Accessory
group_10130	0	0	Accessory
group_10131	0	0	Accessory
group_10132	1	10	Accessory
group_10133	0	0	Accessory
group_10134	0	0	Accessory
group_10135	0	0	Accessory
group_10136	0	0	Accessory
group_10137	0	0	Accessory
group_10138	0	0	Accessory
group_10139	0	0	Accessory
group_1014	0	0	Accessory
group_10140	0	0	Accessory
group_10141	6	60	Accessory
group_10142	0	0	Accessory
group_10143	2	20	Accessory
group_10144	0	0	Accessory
group_10145	0	0	Accessory
group_10146	0	0	Accessory
group_10147	1	10	Accessory
group_10148	1	10	Accessory
group_10149	0	0	Accessory
group_1015	0	0	Accessory
group_10150	0	0	Accessory
group_10151	0	0	Accessory
group_10152	0	0	Accessory
group_10153	0	0	Accessory
group_10154	0	0	Accessory
group_10155	0	0	Accessory
group_10156	0	0	Accessory
group_10157	0	0	Accessory
group_10158	0	0	Accessory
group_10159	0	0	Accessory
group_1016	0	0	Accessory
group_10160	0	0	Accessory
group_10161	0	0	Accessory
group_10162	0	0	Accessory
group_10163	0	0	Accessory
group_10164	0	0	Accessory
group_10165	0	0	Accessory
group_10166	0	0	Accessory
group_10167	1	10	Accessory
group_10168	1	10	Accessory
group_10169	1	10	Accessory
group_1017	0	0	Accessory
group_10170	0	0	Accessory
group_10171	0	0	Accessory
group_10172	0	0	Accessory
group_10173	0	0	Accessory
group_10174	2	20	Accessory
group_10175	3	30	Accessory
group_10176	0	0	Accessory
group_10177	0	0	Accessory
group_10178	1	10	Accessory
group_10179	1	10	Accessory
group_1018	0	0	Accessory
group_10180	1	10	Accessory
group_10181	1	10	Accessory
group_10182	1	10	Accessory
group_10183	0	0	Accessory
group_10184	0	0	Accessory
group_10185	0	0	Accessory
group_10186	0	0	Accessory
group_10187	0	0	Accessory
group_10188	0	0	Accessory
group_10189	0	0	Accessory
group_1019	0	0	Accessory
group_10190	0	0	Accessory
group_10191	0	0	Accessory
group_10192	0	0	Accessory
group_10193	0	0	Accessory
group_10194	0	0	Accessory
group_10195	2	20	Accessory
group_10196	1	10	Accessory
group_10197	0	0	Accessory
group_10198	1	10	Accessory
group_10199	0	0	Accessory
group_102	0	0	Accessory
group_1020	0	0	Accessory
group_10200	1	10	Accessory
group_10201	1	10	Accessory
group_10202	1	10	Accessory
group_10203	0	0	Accessory
group_10204	0	0	Accessory
group_10205	0	0	Accessory
group_10206	0	0	Accessory
group_10207	0	0	Accessory
group_10208	0	0	Accessory
group_10209	0	0	Accessory
group_1021	0	0	Accessory
group_10210	0	0	Accessory
group_10211	0	0	Accessory
group_10212	0	0	Accessory
group_10213	0	0	Accessory
group_10214	0	0	Accessory
group_10215	0	0	Accessory
group_10216	1	10	Accessory
group_10217	1	10	Accessory
group_10218	0	0	Accessory
group_10219	0	0	Accessory
group_1022	0	0	Accessory
group_10220	0	0	Accessory
group_10221	0	0	Accessory
group_10222	0	0	Accessory
group_10223	0	0	Accessory
group_10224	0	0	Accessory
group_10225	0	0	Accessory
group_10226	0	0	Accessory
group_10227	0	0	Accessory
group_10228	0	0	Accessory
group_10229	0	0	Accessory
group_1023	7	70	Accessory
group_10230	0	0	Accessory
group_10231	0	0	Accessory
group_10232	2	20	Accessory
group_10233	0	0	Accessory
group_10234	0	0	Accessory
group_10235	0	0	Accessory
group_10236	0	0	Accessory
group_10237	0	0	Accessory
group_10238	0	0	Accessory
group_10239	0	0	Accessory
group_1024	10	100	Core
group_10240	0	0	Accessory
group_10241	1	10	Accessory
group_10242	1	10	Accessory
group_10243	0	0	Accessory
group_10244	0	0	Accessory
group_10245	0	0	Accessory
group_10246	0	0	Accessory
group_10247	0	0	Accessory
group_10248	0	0	Accessory
group_10249	0	0	Accessory
group_1025	3	30	Accessory
group_10250	0	0	Accessory
group_10251	0	0	Accessory
group_10252	0	0	Accessory
group_10253	2	20	Accessory
group_10254	0	0	Accessory
group_10255	0	0	Accessory
group_10256	0	0	Accessory
group_10257	0	0	Accessory
group_10258	0	0	Accessory
group_10259	1	10	Accessory
group_1026	0	0	Accessory
group_10260	1	10	Accessory
group_10261	0	0	Accessory
group_10262	0	0	Accessory
group_10263	0	0	Accessory
group_10264	0	0	Accessory
group_10265	0	0	Accessory
group_10266	0	0	Accessory
group_10267	0	0	Accessory
group_10268	0	0	Accessory
group_10269	0	0	Accessory
group_1027	9	90	Accessory
group_10270	0	0	Accessory
group_10271	0	0	Accessory
group_10272	0	0	Accessory
group_10273	0	0	Accessory
group_10274	0	0	Accessory
group_10275	0	0	Accessory
group_10276	0	0	Accessory
group_10277	0	0	Accessory
group_10278	0	0	Accessory
group_10279	0	0	Accessory
group_1028	7	70	Accessory
group_10280	1	10	Accessory
group_10281	1	10	Accessory
group_10282	1	10	Accessory
group_10283	0	0	Accessory
group_10284	0	0	Accessory
group_10285	0	0	Accessory
group_10286	0	0	Accessory
group_10287	0	0	Accessory
group_10288	1	10	Accessory
group_10289	0	0	Accessory
group_1029	0	0	Accessory
group_10290	0	0	Accessory
group_10291	0	0	Accessory
group_10292	0	0	Accessory
group_10293	0	0	Accessory
group_10294	0	0	Accessory
group_10295	0	0	Accessory
group_10296	0	0	Accessory
group_10297	0	0	Accessory
group_10298	0	0	Accessory
group_10299	0	0	Accessory
group_103	0	0	Accessory
group_1030	0	0	Accessory
group_10300	0	0	Accessory
group_10301	0	0	Accessory
group_10302	0	0	Accessory
group_10303	0	0	Accessory
group_10304	0	0	Accessory
group_10305	0	0	Accessory
group_10306	0	0	Accessory
group_10307	0	0	Accessory
group_10308	0	0	Accessory
group_10309	0	0	Accessory
group_1031	9	90	Accessory
group_10310	0	0	Accessory
group_10311	0	0	Accessory
group_10312	0	0	Accessory
group_10313	1	10	Accessory
group_10314	0	0	Accessory
group_10315	0	0	Accessory
group_10316	0	0	Accessory
group_10317	0	0	Accessory
group_10318	0	0	Accessory
group_10319	0	0	Accessory
group_1032	1	10	Accessory
group_10320	0	0	Accessory
group_10321	0	0	Accessory
group_10322	0	0	Accessory
group_10323	0	0	Accessory
group_10324	0	0	Accessory
group_10325	0	0	Accessory
group_10326	0	0	Accessory
group_10327	0	0	Accessory
group_10328	0	0	Accessory
group_10329	0	0	Accessory
group_1033	8	80	Accessory
group_10330	1	10	Accessory
group_10331	0	0	Accessory
group_10332	0	0	Accessory
group_10333	0	0	Accessory
group_10334	0	0	Accessory
group_10335	0	0	Accessory
group_10336	0	0	Accessory
group_10337	0	0	Accessory
group_10338	0	0	Accessory
group_10339	1	10	Accessory
group_1034	6	60	Accessory
group_10340	0	0	Accessory
group_10341	0	0	Accessory
group_10342	0	0	Accessory
group_10343	0	0	Accessory
group_10344	0	0	Accessory
group_10345	0	0	Accessory
group_10346	0	0	Accessory
group_10347	0	0	Accessory
group_10348	1	10	Accessory
group_10349	0	0	Accessory
group_1035	0	0	Accessory
group_10350	0	0	Accessory
group_10351	0	0	Accessory
group_10352	0	0	Accessory
group_10353	0	0	Accessory
group_10354	0	0	Accessory
group_10355	0	0	Accessory
group_10356	1	10	Accessory
group_10357	1	10	Accessory
group_10358	0	0	Accessory
group_10359	0	0	Accessory
group_1036	1	10	Accessory
group_10360	0	0	Accessory
group_10361	0	0	Accessory
group_10362	0	0	Accessory
group_10363	0	0	Accessory
group_10364	0	0	Accessory
group_10365	0	0	Accessory
group_10366	0	0	Accessory
group_10367	0	0	Accessory
group_10368	0	0	Accessory
group_10369	0	0	Accessory
group_1037	0	0	Accessory
group_10370	0	0	Accessory
group_10371	1	10	Accessory
group_10372	0	0	Accessory
group_10373	0	0	Accessory
group_10374	0	0	Accessory
group_10375	0	0	Accessory
group_10376	0	0	Accessory
group_10377	1	10	Accessory
group_10378	0	0	Accessory
group_10379	0	0	Accessory
group_1038	0	0	Accessory
group_10380	0	0	Accessory
group_10381	0	0	Accessory
group_10382	0	0	Accessory
group_10383	6	60	Accessory
group_10384	0	0	Accessory
group_10385	0	0	Accessory
group_10386	0	0	Accessory
group_10387	0	0	Accessory
group_10388	1	10	Accessory
group_10389	1	10	Accessory
group_1039	0	0	Accessory
group_10390	1	10	Accessory
group_10391	1	10	Accessory
group_10392	0	0	Accessory
group_10393	0	0	Accessory
group_10394	0	0	Accessory
group_10395	0	0	Accessory
group_10396	0	0	Accessory
group_10397	0	0	Accessory
group_10398	0	0	Accessory
group_10399	0	0	Accessory
group_104	2	20	Accessory
group_1040	0	0	Accessory
group_10400	0	0	Accessory
group_10401	0	0	Accessory
group_10402	0	0	Accessory
group_10403	0	0	Accessory
group_10404	0	0	Accessory
group_10405	0	0	Accessory
group_10406	0	0	Accessory
group_10407	0	0	Accessory
group_10408	0	0	Accessory
group_10409	0	0	Accessory
group_1041	0	0	Accessory
group_10410	0	0	Accessory
group_10411	0	0	Accessory
group_10412	0	0	Accessory
group_10413	1	10	Accessory
group_10414	1	10	Accessory
group_10415	0	0	Accessory
group_10416	0	0	Accessory
group_10417	0	0	Accessory
group_10418	0	0	Accessory
group_10419	0	0	Accessory
group_1042	0	0	Accessory
group_10420	2	20	Accessory
group_10421	1	10	Accessory
group_10422	0	0	Accessory
group_10423	1	10	Accessory
group_10424	1	10	Accessory
group_10425	1	10	Accessory
group_10426	0	0	Accessory
group_10427	0	0	Accessory
group_10428	0	0	Accessory
group_10429	0	0	Accessory
group_1043	0	0	Accessory
group_10430	0	0	Accessory
group_10431	0	0	Accessory
group_10432	0	0	Accessory
group_10433	0	0	Accessory
group_10434	0	0	Accessory
group_10435	0	0	Accessory
group_10436	0	0	Accessory
group_10437	0	0	Accessory
group_10438	0	0	Accessory
group_10439	0	0	Accessory
group_1044	0	0	Accessory
group_10440	0	0	Accessory
group_10441	0	0	Accessory
group_10442	0	0	Accessory
group_10443	0	0	Accessory
group_10444	0	0	Accessory
group_10445	0	0	Accessory
group_10446	0	0	Accessory
group_10447	1	10	Accessory
group_10448	1	10	Accessory
group_10449	1	10	Accessory
group_1045	0	0	Accessory
group_10450	1	10	Accessory
group_10451	0	0	Accessory
group_10452	0	0	Accessory
group_10453	0	0	Accessory
group_10454	0	0	Accessory
group_10455	0	0	Accessory
group_10456	0	0	Accessory
group_10457	0	0	Accessory
group_10458	0	0	Accessory
group_10459	0	0	Accessory
group_1046	1	10	Accessory
group_10460	0	0	Accessory
group_10461	0	0	Accessory
group_10462	0	0	Accessory
group_10463	0	0	Accessory
group_10464	0	0	Accessory
group_10465	2	20	Accessory
group_10466	1	10	Accessory
group_10467	1	10	Accessory
group_10468	0	0	Accessory
group_10469	0	0	Accessory
group_1047	0	0	Accessory
group_10470	0	0	Accessory
group_10471	0	0	Accessory
group_10472	1	10	Accessory
group_10473	1	10	Accessory
group_10474	0	0	Accessory
group_10475	0	0	Accessory
group_10476	0	0	Accessory
group_10477	0	0	Accessory
group_10478	0	0	Accessory
group_10479	0	0	Accessory
group_1048	0	0	Accessory
group_10480	0	0	Accessory
group_10481	0	0	Accessory
group_10482	0	0	Accessory
group_10483	0	0	Accessory
group_10484	1	10	Accessory
group_10485	0	0	Accessory
group_10486	0	0	Accessory
group_10487	0	0	Accessory
group_10488	0	0	Accessory
group_10489	0	0	Accessory
group_1049	0	0	Accessory
group_10490	0	0	Accessory
group_10491	1	10	Accessory
group_10492	1	10	Accessory
group_10493	0	0	Accessory
group_10494	1	10	Accessory
group_10495	1	10	Accessory
group_10496	0	0	Accessory
group_10497	0	0	Accessory
group_10498	0	0	Accessory
group_10499	0	0	Accessory
group_105	0	0	Accessory
group_1050	0	0	Accessory
group_10500	0	0	Accessory
group_10501	0	0	Accessory
group_10502	0	0	Accessory
group_10503	0	0	Accessory
group_10504	0	0	Accessory
group_10505	0	0	Accessory
group_10506	0	0	Accessory
group_10507	0	0	Accessory
group_10508	0	0	Accessory
group_10509	6	60	Accessory
group_1051	5	50	Accessory
group_10510	0	0	Accessory
group_10511	0	0	Accessory
group_10512	1	10	Accessory
group_10513	0	0	Accessory
group_10514	0	0	Accessory
group_10515	0	0	Accessory
group_10516	0	0	Accessory
group_10517	0	0	Accessory
group_10518	0	0	Accessory
group_10519	0	0	Accessory
group_1052	0	0	Accessory
group_10520	0	0	Accessory
group_10521	0	0	Accessory
group_10522	0	0	Accessory
group_10523	0	0	Accessory
group_10524	0	0	Accessory
group_10525	0	0	Accessory
group_10526	0	0	Accessory
group_10527	0	0	Accessory
group_10528	0	0	Accessory
group_10529	0	0	Accessory
group_1053	1	10	Accessory
group_10530	0	0	Accessory
group_10531	0	0	Accessory
group_10532	1	10	Accessory
group_10533	0	0	Accessory
group_10534	0	0	Accessory
group_10535	1	10	Accessory
group_10536	1	10	Accessory
group_10537	1	10	Accessory
group_10538	0	0	Accessory
group_10539	0	0	Accessory
group_1054	1	10	Accessory
group_10540	0	0	Accessory
group_10541	0	0	Accessory
group_10542	0	0	Accessory
group_10543	0	0	Accessory
group_10544	0	0	Accessory
group_10545	0	0	Accessory
group_10546	1	10	Accessory
group_10547	1	10	Accessory
group_10548	0	0	Accessory
group_10549	0	0	Accessory
group_1055	0	0	Accessory
group_10550	0	0	Accessory
group_10551	0	0	Accessory
group_10552	0	0	Accessory
group_10553	0	0	Accessory
group_10554	0	0	Accessory
group_10555	0	0	Accessory
group_10556	0	0	Accessory
group_10557	0	0	Accessory
group_10558	0	0	Accessory
group_10559	0	0	Accessory
group_1056	0	0	Accessory
group_10560	0	0	Accessory
group_10561	0	0	Accessory
group_10562	0	0	Accessory
group_10563	0	0	Accessory
group_10564	0	0	Accessory
group_10565	2	20	Accessory
group_10566	0	0	Accessory
group_10567	0	0	Accessory
group_10568	0	0	Accessory
group_10569	0	0	Accessory
group_1057	0	0	Accessory
group_10570	0	0	Accessory
group_10571	0	0	Accessory
group_10572	0	0	Accessory
group_10573	0	0	Accessory
group_10574	0	0	Accessory
group_10575	0	0	Accessory
group_10576	0	0	Accessory
group_10577	0	0	Accessory
group_10578	0	0	Accessory
group_10579	0	0	Accessory
group_1058	0	0	Accessory
group_10580	0	0	Accessory
group_10581	0	0	Accessory
group_10582	0	0	Accessory
group_10583	0	0	Accessory
group_10584	0	0	Accessory
group_10585	0	0	Accessory
group_10586	0	0	Accessory
group_10587	0	0	Accessory
group_10588	0	0	Accessory
group_10589	0	0	Accessory
group_1059	0	0	Accessory
group_10590	0	0	Accessory
group_10591	0	0	Accessory
group_10592	0	0	Accessory
group_10593	0	0	Accessory
group_10594	0	0	Accessory
group_10595	0	0	Accessory
group_10596	0	0	Accessory
group_10597	1	10	Accessory
group_10598	1	10	Accessory
group_10599	0	0	Accessory
group_106	1	10	Accessory
group_1060	0	0	Accessory
group_10600	0	0	Accessory
group_10601	0	0	Accessory
group_10602	0	0	Accessory
group_10603	0	0	Accessory
group_10604	0	0	Accessory
group_10605	0	0	Accessory
group_10606	0	0	Accessory
group_10607	0	0	Accessory
group_10608	0	0	Accessory
group_10609	0	0	Accessory
group_1061	3	30	Accessory
group_10610	0	0	Accessory
group_10611	0	0	Accessory
group_10612	0	0	Accessory
group_10613	0	0	Accessory
group_10614	0	0	Accessory
group_10615	0	0	Accessory
group_10616	0	0	Accessory
group_10617	0	0	Accessory
group_10618	0	0	Accessory
group_10619	0	0	Accessory
group_1062	0	0	Accessory
group_10620	0	0	Accessory
group_10621	0	0	Accessory
group_10622	0	0	Accessory
group_10623	1	10	Accessory
group_10624	1	10	Accessory
group_10625	1	10	Accessory
group_10626	1	10	Accessory
group_10627	1	10	Accessory
group_10628	1	10	Accessory
group_10629	1	10	Accessory
group_1063	8	80	Accessory
group_10630	1	10	Accessory
group_10631	1	10	Accessory
group_10632	0	0	Accessory
group_10633	0	0	Accessory
group_10634	0	0	Accessory
group_10635	0	0	Accessory
group_10636	0	0	Accessory
group_10637	0	0	Accessory
group_10638	0	0	Accessory
group_10639	0	0	Accessory
group_1064	1	10	Accessory
group_10640	0	0	Accessory
group_10641	0	0	Accessory
group_10642	0	0	Accessory
group_10643	0	0	Accessory
group_10644	0	0	Accessory
group_10645	0	0	Accessory
group_10646	0	0	Accessory
group_10647	0	0	Accessory
group_10648	0	0	Accessory
group_10649	0	0	Accessory
group_1065	0	0	Accessory
group_10650	4	40	Accessory
group_10651	1	10	Accessory
group_10652	0	0	Accessory
group_10653	0	0	Accessory
group_10654	0	0	Accessory
group_10655	1	10	Accessory
group_10656	1	10	Accessory
group_10657	2	20	Accessory
group_10658	1	10	Accessory
group_10659	0	0	Accessory
group_1066	0	0	Accessory
group_10660	0	0	Accessory
group_10661	0	0	Accessory
group_10662	0	0	Accessory
group_10663	0	0	Accessory
group_10664	0	0	Accessory
group_10665	0	0	Accessory
group_10666	0	0	Accessory
group_10667	0	0	Accessory
group_10668	0	0	Accessory
group_10669	0	0	Accessory
group_1067	0	0	Accessory
group_10670	0	0	Accessory
group_10671	0	0	Accessory
group_10672	0	0	Accessory
group_10673	0	0	Accessory
group_10674	0	0	Accessory
group_10675	0	0	Accessory
group_10676	0	0	Accessory
group_10677	0	0	Accessory
group_10678	0	0	Accessory
group_10679	0	0	Accessory
group_1068	0	0	Accessory
group_10680	0	0	Accessory
group_10681	0	0	Accessory
group_10682	0	0	Accessory
group_10683	1	10	Accessory
group_10684	1	10	Accessory
group_10685	0	0	Accessory
group_10686	0	0	Accessory
group_10687	0	0	Accessory
group_10688	0	0	Accessory
group_10689	0	0	Accessory
group_1069	0	0	Accessory
group_10690	0	0	Accessory
group_10691	0	0	Accessory
group_10692	0	0	Accessory
group_10693	0	0	Accessory
group_10694	0	0	Accessory
group_10695	0	0	Accessory
group_10696	0	0	Accessory
group_10697	0	0	Accessory
group_10698	0	0	Accessory
group_10699	1	10	Accessory
group_107	0	0	Accessory
group_1070	0	0	Accessory
group_10700	1	10	Accessory
group_10701	1	10	Accessory
group_10702	0	0	Accessory
group_10703	0	0	Accessory
group_10704	0	0	Accessory
group_10705	0	0	Accessory
group_10706	0	0	Accessory
group_10707	0	0	Accessory
group_10708	0	0	Accessory
group_10709	0	0	Accessory
group_1071	0	0	Accessory
group_10710	0	0	Accessory
group_10711	0	0	Accessory
group_10712	0	0	Accessory
group_10713	0	0	Accessory
group_10714	0	0	Accessory
group_10715	0	0	Accessory
group_10716	0	0	Accessory
group_10717	0	0	Accessory
group_10718	0	0	Accessory
group_10719	0	0	Accessory
group_1072	0	0	Accessory
group_10720	0	0	Accessory
group_10721	0	0	Accessory
group_10722	0	0	Accessory
group_10723	0	0	Accessory
group_10724	0	0	Accessory
group_10725	0	0	Accessory
group_10726	0	0	Accessory
group_10727	0	0	Accessory
group_10728	0	0	Accessory
group_10729	0	0	Accessory
group_1073	0	0	Accessory
group_10730	0	0	Accessory
group_10731	0	0	Accessory
group_10732	0	0	Accessory
group_10733	0	0	Accessory
group_10734	0	0	Accessory
group_10735	1	10	Accessory
group_10736	1	10	Accessory
group_10737	1	10	Accessory
group_10738	1	10	Accessory
group_10739	0	0	Accessory
group_1074	0	0	Accessory
group_10740	0	0	Accessory
group_10741	0	0	Accessory
group_10742	0	0	Accessory
group_10743	0	0	Accessory
group_10744	0	0	Accessory
group_10745	0	0	Accessory
group_10746	0	0	Accessory
group_10747	0	0	Accessory
group_10748	0	0	Accessory
group_10749	0	0	Accessory
group_1075	0	0	Accessory
group_10750	1	10	Accessory
group_10751	0	0	Accessory
group_10752	0	0	Accessory
group_10753	0	0	Accessory
group_10754	0	0	Accessory
group_10755	0	0	Accessory
group_10756	0	0	Accessory
group_10757	0	0	Accessory
group_10758	0	0	Accessory
group_10759	0	0	Accessory
group_1076	1	10	Accessory
group_10760	0	0	Accessory
group_10761	0	0	Accessory
group_10762	0	0	Accessory
group_10763	0	0	Accessory
group_10764	0	0	Accessory
group_10765	0	0	Accessory
group_10766	1	10	Accessory
group_10767	2	20	Accessory
group_10768	0	0	Accessory
group_10769	0	0	Accessory
group_1077	1	10	Accessory
group_10770	0	0	Accessory
group_10771	0	0	Accessory
group_10772	0	0	Accessory
group_10773	0	0	Accessory
group_10774	0	0	Accessory
group_10775	0	0	Accessory
group_10776	1	10	Accessory
group_10777	1	10	Accessory
group_10778	0	0	Accessory
group_10779	0	0	Accessory
group_1078	1	10	Accessory
group_10780	0	0	Accessory
group_10781	0	0	Accessory
group_10782	0	0	Accessory
group_10783	0	0	Accessory
group_10784	0	0	Accessory
group_10785	0	0	Accessory
group_10786	0	0	Accessory
group_10787	0	0	Accessory
group_10788	0	0	Accessory
group_10789	0	0	Accessory
group_1079	0	0	Accessory
group_10790	0	0	Accessory
group_10791	0	0	Accessory
group_10792	1	10	Accessory
group_10793	1	10	Accessory
group_10794	0	0	Accessory
group_10795	0	0	Accessory
group_10796	0	0	Accessory
group_10797	0	0	Accessory
group_10798	0	0	Accessory
group_10799	0	0	Accessory
group_108	0	0	Accessory
group_1080	0	0	Accessory
group_10800	0	0	Accessory
group_10801	0	0	Accessory
group_10802	0	0	Accessory
group_10803	0	0	Accessory
group_10804	3	30	Accessory
group_10805	2	20	Accessory
group_10806	0	0	Accessory
group_10807	0	0	Accessory
group_10808	0	0	Accessory
group_10809	0	0	Accessory
group_1081	0	0	Accessory
group_10810	0	0	Accessory
group_10811	1	10	Accessory
group_10812	0	0	Accessory
group_10813	0	0	Accessory
group_10814	0	0	Accessory
group_10815	1	10	Accessory
group_10816	1	10	Accessory
group_10817	1	10	Accessory
group_10818	1	10	Accessory
group_10819	1	10	Accessory
group_1082	3	30	Accessory
group_10820	0	0	Accessory
group_10821	0	0	Accessory
group_10822	0	0	Accessory
group_10823	0	0	Accessory
group_10824	0	0	Accessory
group_10825	2	20	Accessory
group_10826	6	60	Accessory
group_10827	0	0	Accessory
group_10828	0	0	Accessory
group_10829	0	0	Accessory
group_1083	0	0	Accessory
group_10830	0	0	Accessory
group_10831	0	0	Accessory
group_10832	0	0	Accessory
group_10833	1	10	Accessory
group_10834	1	10	Accessory
group_10835	0	0	Accessory
group_10836	0	0	Accessory
group_10837	0	0	Accessory
group_10838	0	0	Accessory
group_10839	0	0	Accessory
group_1084	0	0	Accessory
group_10840	0	0	Accessory
group_10841	0	0	Accessory
group_10842	0	0	Accessory
group_10843	0	0	Accessory
group_10844	0	0	Accessory
group_10845	0	0	Accessory
group_10846	0	0	Accessory
group_10847	0	0	Accessory
group_10848	0	0	Accessory
group_10849	0	0	Accessory
group_1085	0	0	Accessory
group_10850	0	0	Accessory
group_10851	0	0	Accessory
group_10852	0	0	Accessory
group_10853	0	0	Accessory
group_10854	0	0	Accessory
group_10855	0	0	Accessory
group_10856	0	0	Accessory
group_10857	0	0	Accessory
group_10858	1	10	Accessory
group_10859	0	0	Accessory
group_1086	0	0	Accessory
group_10860	0	0	Accessory
group_10861	1	10	Accessory
group_10862	1	10	Accessory
group_10863	0	0	Accessory
group_10864	0	0	Accessory
group_10865	0	0	Accessory
group_10866	0	0	Accessory
group_10867	0	0	Accessory
group_10868	0	0	Accessory
group_10869	0	0	Accessory
group_1087	0	0	Accessory
group_10870	0	0	Accessory
group_10871	0	0	Accessory
group_10872	0	0	Accessory
group_10873	0	0	Accessory
group_10874	0	0	Accessory
group_10875	1	10	Accessory
group_10876	1	10	Accessory
group_10877	0	0	Accessory
group_10878	0	0	Accessory
group_10879	0	0	Accessory
group_1088	0	0	Accessory
group_10880	0	0	Accessory
group_10881	0	0	Accessory
group_10882	0	0	Accessory
group_10883	0	0	Accessory
group_10884	0	0	Accessory
group_10885	0	0	Accessory
group_10886	0	0	Accessory
group_10887	0	0	Accessory
group_10888	0	0	Accessory
group_10889	0	0	Accessory
group_1089	0	0	Accessory
group_10890	0	0	Accessory
group_10891	0	0	Accessory
group_10892	0	0	Accessory
group_10893	0	0	Accessory
group_10894	0	0	Accessory
group_10895	0	0	Accessory
group_10896	1	10	Accessory
group_10897	1	10	Accessory
group_10898	0	0	Accessory
group_10899	0	0	Accessory
group_109	0	0	Accessory
group_1090	3	30	Accessory
group_10900	0	0	Accessory
group_10901	1	10	Accessory
group_10902	1	10	Accessory
group_10903	1	10	Accessory
group_10904	0	0	Accessory
group_10905	1	10	Accessory
group_10906	0	0	Accessory
group_10907	0	0	Accessory
group_10908	0	0	Accessory
group_10909	0	0	Accessory
group_1091	0	0	Accessory
group_10910	0	0	Accessory
group_10911	2	20	Accessory
group_10912	0	0	Accessory
group_10913	0	0	Accessory
group_10914	0	0	Accessory
group_10915	0	0	Accessory
group_10916	0	0	Accessory
group_10917	0	0	Accessory
group_10918	0	0	Accessory
group_10919	0	0	Accessory
group_1092	0	0	Accessory
group_10920	0	0	Accessory
group_10921	0	0	Accessory
group_10922	0	0	Accessory
group_10923	0	0	Accessory
group_10924	0	0	Accessory
group_10925	0	0	Accessory
group_10926	0	0	Accessory
group_10927	1	10	Accessory
group_10928	1	10	Accessory
group_10929	0	0	Accessory
group_1093	1	10	Accessory
group_10930	0	0	Accessory
group_10931	0	0	Accessory
group_10932	1	10	Accessory
group_10933	0	0	Accessory
group_10934	0	0	Accessory
group_10935	0	0	Accessory
group_10936	0	0	Accessory
group_10937	0	0	Accessory
group_10938	0	0	Accessory
group_10939	0	0	Accessory
group_1094	0	0	Accessory
group_10940	0	0	Accessory
group_10941	0	0	Accessory
group_10942	0	0	Accessory
group_10943	1	10	Accessory
group_10944	1	10	Accessory
group_10945	0	0	Accessory
group_10946	0	0	Accessory
group_10947	0	0	Accessory
group_10948	0	0	Accessory
group_10949	0	0	Accessory
group_1095	1	10	Accessory
group_10950	0	0	Accessory
group_10951	0	0	Accessory
group_10952	0	0	Accessory
group_10953	0	0	Accessory
group_10954	0	0	Accessory
group_10955	0	0	Accessory
group_10956	0	0	Accessory
group_10957	0	0	Accessory
group_10958	0	0	Accessory
group_10959	0	0	Accessory
group_1096	0	0	Accessory
group_10960	0	0	Accessory
group_10961	0	0	Accessory
group_10962	0	0	Accessory
group_10963	0	0	Accessory
group_10964	0	0	Accessory
group_10965	0	0	Accessory
group_10966	0	0	Accessory
group_10967	1	10	Accessory
group_10968	1	10	Accessory
group_10969	0	0	Accessory
group_1097	3	30	Accessory
group_10970	0	0	Accessory
group_10971	0	0	Accessory
group_10972	0	0	Accessory
group_10973	0	0	Accessory
group_10974	0	0	Accessory
group_10975	0	0	Accessory
group_10976	0	0	Accessory
group_10977	0	0	Accessory
group_10978	0	0	Accessory
group_10979	0	0	Accessory
group_1098	0	0	Accessory
group_10980	0	0	Accessory
group_10981	0	0	Accessory
group_10982	0	0	Accessory
group_10983	2	20	Accessory
group_10984	0	0	Accessory
group_10985	0	0	Accessory
group_10986	0	0	Accessory
group_10987	0	0	Accessory
group_10988	1	10	Accessory
group_10989	0	0	Accessory
group_1099	1	10	Accessory
group_10990	0	0	Accessory
group_10991	0	0	Accessory
group_10992	0	0	Accessory
group_10993	0	0	Accessory
group_10994	0	0	Accessory
group_10995	0	0	Accessory
group_10996	0	0	Accessory
group_10997	0	0	Accessory
group_10998	0	0	Accessory
group_10999	0	0	Accessory
group_11	0	0	Accessory
group_110	0	0	Accessory
group_1100	2	20	Accessory
group_11000	0	0	Accessory
group_11001	0	0	Accessory
group_11002	0	0	Accessory
group_11003	0	0	Accessory
group_11004	0	0	Accessory
group_11005	0	0	Accessory
group_11006	0	0	Accessory
group_11007	0	0	Accessory
group_11008	0	0	Accessory
group_11009	0	0	Accessory
group_1101	0	0	Accessory
group_11010	0	0	Accessory
group_11011	0	0	Accessory
group_11012	0	0	Accessory
group_11013	1	10	Accessory
group_11014	1	10	Accessory
group_11015	1	10	Accessory
group_11016	0	0	Accessory
group_11017	1	10	Accessory
group_11018	1	10	Accessory
group_11019	0	0	Accessory
group_1102	4	40	Accessory
group_11020	0	0	Accessory
group_11021	0	0	Accessory
group_11022	0	0	Accessory
group_11023	0	0	Accessory
group_11024	0	0	Accessory
group_11025	0	0	Accessory
group_11026	0	0	Accessory
group_11027	0	0	Accessory
group_11028	0	0	Accessory
group_11029	0	0	Accessory
group_1103	0	0	Accessory
group_11030	0	0	Accessory
group_11031	0	0	Accessory
group_11032	0	0	Accessory
group_11033	0	0	Accessory
group_11034	0	0	Accessory
group_11035	0	0	Accessory
group_11036	0	0	Accessory
group_11037	0	0	Accessory
group_11038	0	0	Accessory
group_11039	0	0	Accessory
group_1104	0	0	Accessory
group_11040	0	0	Accessory
group_11041	0	0	Accessory
group_11042	0	0	Accessory
group_11043	0	0	Accessory
group_11044	0	0	Accessory
group_11045	0	0	Accessory
group_11046	0	0	Accessory
group_11047	0	0	Accessory
group_11048	0	0	Accessory
group_11049	0	0	Accessory
group_1105	0	0	Accessory
group_11050	0	0	Accessory
group_11051	0	0	Accessory
group_11052	0	0	Accessory
group_11053	0	0	Accessory
group_11054	0	0	Accessory
group_11055	0	0	Accessory
group_11056	0	0	Accessory
group_11057	0	0	Accessory
group_11058	0	0	Accessory
group_11059	1	10	Accessory
group_1106	0	0	Accessory
group_11060	1	10	Accessory
group_11061	1	10	Accessory
group_11062	1	10	Accessory
group_11063	1	10	Accessory
group_11064	0	0	Accessory
group_11065	0	0	Accessory
group_11066	0	0	Accessory
group_11067	0	0	Accessory
group_11068	0	0	Accessory
group_11069	0	0	Accessory
group_1107	8	80	Accessory
group_11070	0	0	Accessory
group_11071	0	0	Accessory
group_11072	1	10	Accessory
group_11073	1	10	Accessory
group_11074	0	0	Accessory
group_11075	0	0	Accessory
group_11076	1	10	Accessory
group_11077	1	10	Accessory
group_11078	1	10	Accessory
group_11079	0	0	Accessory
group_1108	0	0	Accessory
group_11080	0	0	Accessory
group_11081	0	0	Accessory
group_11082	0	0	Accessory
group_11083	0	0	Accessory
group_11084	0	0	Accessory
group_11085	0	0	Accessory
group_11086	0	0	Accessory
group_11087	0	0	Accessory
group_11088	0	0	Accessory
group_11089	0	0	Accessory
group_1109	0	0	Accessory
group_11090	0	0	Accessory
group_11091	0	0	Accessory
group_11092	0	0	Accessory
group_11093	0	0	Accessory
group_11094	0	0	Accessory
group_11095	0	0	Accessory
group_11096	0	0	Accessory
group_11097	0	0	Accessory
group_11098	0	0	Accessory
group_11099	1	10	Accessory
group_111	0	0	Accessory
group_1110	0	0	Accessory
group_11100	1	10	Accessory
group_11101	0	0	Accessory
group_11102	0	0	Accessory
group_11103	0	0	Accessory
group_11104	1	10	Accessory
group_11105	1	10	Accessory
group_11106	0	0	Accessory
group_11107	0	0	Accessory
group_11108	0	0	Accessory
group_11109	0	0	Accessory
group_1111	2	20	Accessory
group_11110	0	0	Accessory
group_11111	0	0	Accessory
group_11112	0	0	Accessory
group_11113	0	0	Accessory
group_11114	0	0	Accessory
group_11115	0	0	Accessory
group_11116	0	0	Accessory
[truncated: 23,138 more rows]

## Sheet: Cluster 6
Supplementary Table 9: Core and accessory genes identified in Cluster 6
Gene	n_present	core_percentage	gene_type
aCT	10	100	Core
aF0785	10	100	Core
aF2118	5	50	Accessory
aIM24	0	0	Accessory
aRA1	0	0	Accessory
aRO8	0	0	Accessory
aac6	0	0	Accessory
aarF	0	0	Accessory
abcX	0	0	Accessory
abcf	10	100	Core
abgB	0	0	Accessory
abiF	0	0	Accessory
abiH	0	0	Accessory
abiV	1	10	Accessory
abpA	0	0	Accessory
abrB	5	50	Accessory
accA	10	100	Core
accB	10	100	Core
accC	1	10	Accessory
accD	10	100	Core
aceF	10	100	Core
ackA	0	0	Accessory
acm	0	0	Accessory
acnA	0	0	Accessory
acoA	0	0	Accessory
acoA~~~pdhA	10	100	Core
acoB	10	100	Core
acpA	6	60	Accessory
acpA~~~acpB	0	0	Accessory
acpB	0	0	Accessory
acpP	10	100	Core
acpS	0	0	Accessory
acrA	0	0	Accessory
acrIIA6	1	10	Accessory
acrR	0	0	Accessory
acrR~~~tetR	9	90	Accessory
acuB	0	0	Accessory
acuB~~~cBS	10	100	Core
acuI~~~yhfP	1	10	Accessory
acyP	10	100	Core
adaA	1	10	Accessory
adaB	0	0	Accessory
adcA	0	0	Accessory
adcC	0	0	Accessory
add	0	0	Accessory
addA	0	0	Accessory
adhE	0	0	Accessory
adhP	0	0	Accessory
adk	10	100	Core
aes	0	0	Accessory
afuA	0	0	Accessory
afuC	10	100	Core
aga	0	0	Accessory
agaB	10	100	Core
agaS	10	100	Core
agrC	0	0	Accessory
aguA	0	0	Accessory
aguB	10	100	Core
ahpC	0	0	Accessory
ahpF	0	0	Accessory
alaS	0	0	Accessory
albA	0	0	Accessory
albE~~~pqqL	10	100	Core
albF	0	0	Accessory
albF~~~pqqL	10	100	Core
ald	0	0	Accessory
aliA	0	0	Accessory
aliA~~~sarA~~~oppA	6	60	Accessory
alkD	0	0	Accessory
alpA	2	20	Accessory
alr	10	100	Core
alr~~~acpS	10	100	Core
alsS	0	0	Accessory
alsT	0	0	Accessory
alwI	0	0	Accessory
amaP	0	0	Accessory
amiA	0	0	Accessory
amiF~~~oppF	10	100	Core
ampC	0	0	Accessory
ampH	0	0	Accessory
ampH~~~ampC	10	100	Core
ampS~~~pepS	10	100	Core
amrA	0	0	Accessory
amsE	10	100	Core
amt	0	0	Accessory
amtB	0	0	Accessory
amyA	10	100	Core
ansA	0	0	Accessory
ansP	10	100	Core
ant6	10	100	Core
apbE	0	0	Accessory
apeA	1	10	Accessory
aph3IIIa	0	0	Accessory
aprE	8	80	Accessory
apt	10	100	Core
araC	0	0	Accessory
araC~~~tetD	0	0	Accessory
araD	1	10	Accessory
araJ	0	0	Accessory
araQ	0	0	Accessory
araQ~~~ugpE	10	100	Core
arcA	1	10	Accessory
arcC	1	10	Accessory
arcR	0	0	Accessory
arcT	0	0	Accessory
ardA	0	0	Accessory
argA~~~ywnH	10	100	Core
argB	0	0	Accessory
argC	0	0	Accessory
argD	0	0	Accessory
argE	10	100	Core
argF	1	10	Accessory
argG	0	0	Accessory
argH	0	0	Accessory
argJ	0	0	Accessory
argR	10	100	Core
argS	10	100	Core
arlR	5	50	Accessory
arlR~~~csrR~~~ompR	10	100	Core
aroA	0	0	Accessory
aroB	0	0	Accessory
aroB~~~aroE	10	100	Core
aroC	10	100	Core
aroD	10	100	Core
aroE	0	0	Accessory
aroG1	10	100	Core
aroK	10	100	Core
arpU	0	0	Accessory
arsC	1	10	Accessory
arsC~~~adaB	10	100	Core
arsR	0	0	Accessory
artM	0	0	Accessory
asbA	1	10	Accessory
ascB	0	0	Accessory
asd	10	100	Core
asnA	0	0	Accessory
asnS	10	100	Core
asp1	0	0	Accessory
asp2	0	0	Accessory
asp3	0	0	Accessory
asp4	0	0	Accessory
asp5	0	0	Accessory
aspB	10	100	Core
aspB~~~alaT	0	0	Accessory
aspS	0	0	Accessory
atoS	0	0	Accessory
atpA	10	100	Core
atpB	10	100	Core
atpC	10	100	Core
atpD	10	100	Core
atpE	0	0	Accessory
atpF	10	100	Core
atpG	10	100	Core
atpH	0	0	Accessory
avrD	0	0	Accessory
axe1	10	100	Core
azlC	10	100	Core
azlC~~~ygaZ	0	0	Accessory
azlD	10	100	Core
azlD2	0	0	Accessory
baeS	0	0	Accessory
bcc	0	0	Accessory
bceA	0	0	Accessory
bceB	0	0	Accessory
bceB~~~yxdM	10	100	Core
bcrC	0	0	Accessory
bcsA	0	0	Accessory
bcsZ	0	0	Accessory
beeE	0	0	Accessory
bepR	0	0	Accessory
bet	0	0	Accessory
betI~~~tetR	0	0	Accessory
bglB	0	0	Accessory
bglB~~~gmuD~~~bglA	10	100	Core
bglG	0	0	Accessory
bglG~~~licT	0	0	Accessory
bglH	0	0	Accessory
bgrS	3	30	Accessory
bhtF	0	0	Accessory
bigG	0	0	Accessory
bioF	0	0	Accessory
bioH	0	0	Accessory
bioY	1	10	Accessory
birA	0	0	Accessory
blaR1	0	0	Accessory
blpA	7	70	Accessory
blpC	0	0	Accessory
blpI	0	0	Accessory
blpJ	0	0	Accessory
blpL	4	40	Accessory
blpM	7	70	Accessory
blpO	3	30	Accessory
blpP	0	0	Accessory
blpR	0	0	Accessory
blpS~~~lytR~~~lytT	7	70	Accessory
blpT	0	0	Accessory
blpX	1	10	Accessory
blpY	1	10	Accessory
blpZ	7	70	Accessory
bofA	0	0	Accessory
briC	2	20	Accessory
brkB	0	0	Accessory
brkB~~~yihY	0	0	Accessory
brnQ	10	100	Core
brpA	0	0	Accessory
btuD	10	100	Core
btuE	9	90	Accessory
budA	0	0	Accessory
cDA1	0	0	Accessory
cadA	0	0	Accessory
cadD	6	60	Accessory
cadX	0	0	Accessory
caiA	0	0	Accessory
caiD~~~fabM	10	100	Core
capA	0	0	Accessory
capD	0	0	Accessory
carA	10	100	Core
carB	0	0	Accessory
cas1	5	50	Accessory
cas10	0	0	Accessory
cas1c	0	0	Accessory
cas2	5	50	Accessory
cas3	0	0	Accessory
cas4	0	0	Accessory
cas5c	0	0	Accessory
cas6	1	10	Accessory
cas7c	0	0	Accessory
cas8c	0	0	Accessory
cas9	0	0	Accessory
catE	9	90	Accessory
cbbX	2	20	Accessory
cbiA	0	0	Accessory
cbiB	0	0	Accessory
cbiC	0	0	Accessory
cbiD	0	0	Accessory
cbiE	0	0	Accessory
cbiF	0	0	Accessory
cbiG	0	0	Accessory
cbiM	0	0	Accessory
cbiN	0	0	Accessory
cbiO	0	0	Accessory
cbiQ	0	0	Accessory
cbiT	0	0	Accessory
cbpB	10	100	Core
cbpC	5	50	Accessory
cbpD	0	0	Accessory
cbpD2	10	100	Core
cbpE	0	0	Accessory
cbpF~~~cbpJ	9	90	Accessory
cbpI	0	0	Accessory
cbrC	0	0	Accessory
cca	0	0	Accessory
ccc1	10	100	Core
ccdA	0	0	Accessory
ccdA2	0	0	Accessory
ccdA2~~~ccdA	10	100	Core
ccmA	10	100	Core
ccmD	0	0	Accessory
ccmE	0	0	Accessory
ccmK	0	0	Accessory
ccoS	1	10	Accessory
ccpA	0	0	Accessory
ccpA~~~lacI	10	100	Core
ccpN	0	0	Accessory
ccrZ	10	100	Core
cdaA	0	0	Accessory
cdaR~~~ybbR	10	100	Core
cdd	10	100	Core
cdiI	4	40	Accessory
cdsA	10	100	Core
celA	0	0	Accessory
celA~~~comEA	10	100	Core
celB	0	0	Accessory
celB~~~comEC	10	100	Core
celC	0	0	Accessory
celC~~~bigG	0	0	Accessory
ceuA	0	0	Accessory
ceuB	0	0	Accessory
ceuC	0	0	Accessory
ceuD	0	0	Accessory
chaP	0	0	Accessory
ciaH~~~baeS	10	100	Core
ciaR	0	0	Accessory
cibA	1	10	Accessory
cibB	1	10	Accessory
cinA	10	100	Core
citA	0	0	Accessory
citB	0	0	Accessory
citB~~~luxR~~~degU	10	100	Core
citC	0	0	Accessory
citD	0	0	Accessory
citE	0	0	Accessory
citF	0	0	Accessory
citG	0	0	Accessory
citM	0	0	Accessory
citS	0	0	Accessory
citS~~~yesM	7	70	Accessory
citX	0	0	Accessory
citZ	0	0	Accessory
clcA	10	100	Core
clcB	0	0	Accessory
clpA	0	0	Accessory
clpA~~~clpC	10	100	Core
clpA~~~clpE	10	100	Core
clpB	0	0	Accessory
clpC	0	0	Accessory
clpC1	0	0	Accessory
clpE	0	0	Accessory
clpL	0	0	Accessory
clpL~~~clpA	10	100	Core
clpP	10	100	Core
clpX	0	0	Accessory
cls	10	100	Core
cmk	10	100	Core
cmr4	1	10	Accessory
coaA	10	100	Core
coaB	0	0	Accessory
coaC	10	100	Core
coaD	0	0	Accessory
coaE	0	0	Accessory
cobA	0	0	Accessory
cobB	0	0	Accessory
cobD	0	0	Accessory
cobI	0	0	Accessory
cobJ	0	0	Accessory
cobK	0	0	Accessory
cobN	0	0	Accessory
cobQ	0	0	Accessory
cobQ~~~gatD	10	100	Core
cobS	0	0	Accessory
cobT	0	0	Accessory
cobU	0	0	Accessory
codY	0	0	Accessory
cof	0	0	Accessory
cofD	0	0	Accessory
cof~~~ybjI	10	100	Core
coiA	10	100	Core
coiA~~~prsA	0	0	Accessory
comA	0	0	Accessory
comA~~~pncF	10	100	Core
comB	0	0	Accessory
comC	0	0	Accessory
comD	0	0	Accessory
comD~~~natK	0	0	Accessory
comD~~~yesM~~~dcuS	10	100	Core
comE	0	0	Accessory
comEA	0	0	Accessory
comEB	0	0	Accessory
comEC	0	0	Accessory
comE~~~comEB	10	100	Core
comF	0	0	Accessory
comFA	0	0	Accessory
comFA~~~comF	0	0	Accessory
comFC	0	0	Accessory
comF~~~comFC	10	100	Core
comF~~~recG~~~comFA	10	100	Core
comGA	0	0	Accessory
comGA~~~comGB	10	100	Core
comGB	0	0	Accessory
comGC	10	100	Core
comGD	10	100	Core
comGE	0	0	Accessory
comGF	0	0	Accessory
comGF~~~comGG	10	100	Core
comGG	0	0	Accessory
comM	9	90	Accessory
comP	0	0	Accessory
comR	4	40	Accessory
comR1	0	0	Accessory
comW	0	0	Accessory
comX	0	0	Accessory
comX1	0	0	Accessory
comX1~~~comX	0	0	Accessory
comX2	1	10	Accessory
comX2~~~comX1	0	0	Accessory
copG	0	0	Accessory
copY	0	0	Accessory
copZ	0	0	Accessory
corA	10	100	Core
cotH	0	0	Accessory
cotS	0	0	Accessory
cotS~~~licA	10	100	Core
cpdA	0	0	Accessory
cpdB	0	0	Accessory
cpoA	10	100	Core
cppA	0	0	Accessory
cps2a	0	0	Accessory
cps4B	0	0	Accessory
cpsC	10	100	Core
cpsD	0	0	Accessory
cpsD~~~mrp	10	100	Core
cpsE~~~wcaJ~~~epsL	10	100	Core
cpsI	0	0	Accessory
cpsJ	0	0	Accessory
cpsL	0	0	Accessory
cpsO~~~epsJ	1	10	Accessory
crcB	0	0	Accessory
crcB~~~fluC	10	100	Core
crp	0	0	Accessory
csbD	6	60	Accessory
cshA	0	0	Accessory
cshA~~~srmB	10	100	Core
cshA~~~srmB~~~yfmL	10	100	Core
cshB	0	0	Accessory
cshB~~~srmB	10	100	Core
csm2	0	0	Accessory
csm3	0	0	Accessory
csm4	0	0	Accessory
csm5	0	0	Accessory
csm6	0	0	Accessory
csn2	5	50	Accessory
csoR	10	100	Core
ctpA	0	0	Accessory
ctsR	10	100	Core
cutC	0	0	Accessory
cutD	0	0	Accessory
cvfB	0	0	Accessory
cvpA	0	0	Accessory
cwlA	0	0	Accessory
cwlO	10	100	Core
cydC	0	0	Accessory
cydD	0	0	Accessory
cylB	0	0	Accessory
cynT	10	100	Core
cynX	10	100	Core
cysA	0	0	Accessory
cysB	0	0	Accessory
cysE	0	0	Accessory
cysE~~~epsC~~~rimI	10	100	Core
cysK	10	100	Core
cysS	10	100	Core
czcD	10	100	Core
dAP2	0	0	Accessory
dLH	0	0	Accessory
dacC	0	0	Accessory
dadA	10	100	Core
dam	0	0	Accessory
dapA	10	100	Core
dapB	0	0	Accessory
dapD	10	100	Core
darT	0	0	Accessory
dcm	0	0	Accessory
ddl	10	100	Core
dedA	0	0	Accessory
def	10	100	Core
degA	0	0	Accessory
degP	0	0	Accessory
degV	0	0	Accessory
degV~~~trmH	0	0	Accessory
deoB	10	100	Core
deoC	10	100	Core
deoD	10	100	Core
deoR	3	30	Accessory
deoR~~~glpR	10	100	Core
deoR~~~ulaR~~~glpR	0	0	Accessory
der	0	0	Accessory
dexB	10	100	Core
dgkA	10	100	Core
dhaK	0	0	Accessory
dhaK~~~dhaQ	0	0	Accessory
dhaL	0	0	Accessory
dhaM	0	0	Accessory
dhaQ	0	0	Accessory
dhaS	0	0	Accessory
dhfR	10	100	Core
dicA	0	0	Accessory
dinB	10	100	Core
dinD	1	10	Accessory
dinF	0	0	Accessory
dinG	0	0	Accessory
divIB	0	0	Accessory
divIVA	10	100	Core
dltA	0	0	Accessory
dltB	10	100	Core
dltC	0	0	Accessory
dltD	10	100	Core
dltR	0	0	Accessory
dnaA	0	0	Accessory
dnaB	0	0	Accessory
dnaB~~~dnaD	10	100	Core
dnaC	1	10	Accessory
dnaD	10	100	Core
dnaE	0	0	Accessory
dnaG	10	100	Core
dnaI	0	0	Accessory
dnaJ	0	0	Accessory
dnaK	10	100	Core
dnaN	0	0	Accessory
dnaQ	0	0	Accessory
dnaQ~~~dinG~~~polC	10	100	Core
dnaQ~~~polC	0	0	Accessory
dnaX	0	0	Accessory
doc	5	50	Accessory
dpiB	0	0	Accessory
dpnA	0	0	Accessory
dpnD	0	0	Accessory
dpnI	10	100	Core
dpnM	0	0	Accessory
dppB	0	0	Accessory
dppC	0	0	Accessory
dppD	0	0	Accessory
dprA	10	100	Core
dps	10	100	Core
draG	2	20	Accessory
drrA	1	10	Accessory
drrB	8	80	Accessory
dsbD	0	0	Accessory
dtd	1	10	Accessory
dusB	10	100	Core
dut	10	100	Core
eCFS	0	0	Accessory
eMAP	10	100	Core
eRG12	0	0	Accessory
eamA	0	0	Accessory
eamA~~~rhaT	10	100	Core
eamA~~~yicL	10	100	Core
ebgC	10	100	Core
ebhA	7	70	Accessory
ebsA	0	0	Accessory
ebsC	10	100	Core
ecfA1	0	0	Accessory
ecfA2	0	0	Accessory
ecfT	0	0	Accessory
ecfT~~~mtsC~~~cbiQ	0	0	Accessory
ecsA~~~ccmA	10	100	Core
ecsB	0	0	Accessory
ecsC	0	0	Accessory
eda	0	0	Accessory
efeB	1	10	Accessory
efeO	1	10	Accessory
efeU	1	10	Accessory
efiE	0	0	Accessory
efp	10	100	Core
egtUA	10	100	Core
egtUBC	10	100	Core
ehuA	10	100	Core
elaA	0	0	Accessory
elaC	0	0	Accessory
elsH	0	0	Accessory
elyC	0	0	Accessory
endA	10	100	Core
engA	0	0	Accessory
eno	0	0	Accessory
entS	10	100	Core
epsA	0	0	Accessory
epsB	0	0	Accessory
epsE	0	0	Accessory
epsF	0	0	Accessory
epsG	0	0	Accessory
epsH	0	0	Accessory
epsJ	0	0	Accessory
epsJ~~~wcaA	1	10	Accessory
epsL	0	0	Accessory
epsN	0	0	Accessory
epsV	1	10	Accessory
epuA	0	0	Accessory
era	10	100	Core
eriC	0	0	Accessory
ermB	0	0	Accessory
ermL~~~ermC	0	0	Accessory
esaA	0	0	Accessory
esaC	0	0	Accessory
escB	0	0	Accessory
essA	0	0	Accessory
essB	0	0	Accessory
essC	0	0	Accessory
essC~~~ftsK	0	0	Accessory
esxA	0	0	Accessory
eutA	0	0	Accessory
eutC	0	0	Accessory
eutD	0	0	Accessory
eutH	0	0	Accessory
eutJ	0	0	Accessory
eutL	0	0	Accessory
eutM	0	0	Accessory
eutN	0	0	Accessory
eutP	0	0	Accessory
eutQ	0	0	Accessory
exoY~~~wcaJ	10	100	Core
exp7~~~mgtA	10	100	Core
exp8	10	100	Core
ezrA	10	100	Core
fAU1	10	100	Core
fIDO	0	0	Accessory
fMR2	0	0	Accessory
fabD	0	0	Accessory
fabF	10	100	Core
fabG	10	100	Core
fabH	10	100	Core
fabK	10	100	Core
fabM	0	0	Accessory
fabZ	10	100	Core
fabZ~~~fatA	10	100	Core
fabZ~~~paaI	10	100	Core
fabZ~~~spxR	0	0	Accessory
fadH2	0	0	Accessory
fadM	0	0	Accessory
fasA	0	0	Accessory
fatA	0	0	Accessory
fba	10	100	Core
fbp	0	0	Accessory
fbpA	0	0	Accessory
fbpB	0	0	Accessory
fctA	0	0	Accessory
femA	0	0	Accessory
femA~~~murN	0	0	Accessory
femB~~~fmhB	0	0	Accessory
feoA	0	0	Accessory
feoB	0	0	Accessory
fer	0	0	Accessory
ffh	10	100	Core
fghA	0	0	Accessory
fhs	0	0	Accessory
fhs1	0	0	Accessory
fhs~~~fhs2	10	100	Core
fibA	6	60	Accessory
fieF	0	0	Accessory
fieF~~~mntE	10	100	Core
fimA	0	0	Accessory
fimB	0	0	Accessory
fimC	0	0	Accessory
flaA1	10	100	Core
fldA	10	100	Core
flgJ	0	0	Accessory
flgM	0	0	Accessory
fliA	0	0	Accessory
fliJ	0	0	Accessory
fliK	0	0	Accessory
fliS	0	0	Accessory
fmhB	0	0	Accessory
fmnP	10	100	Core
fmt	10	100	Core
fmtA	0	0	Accessory
fni	0	0	Accessory
focA	10	100	Core
folA	0	0	Accessory
folB	0	0	Accessory
folC	10	100	Core
folD	10	100	Core
folE	0	0	Accessory
folK	0	0	Accessory
folK~~~folB	10	100	Core
folP	0	0	Accessory
folT	0	0	Accessory
frmA	0	0	Accessory
frmB	10	100	Core
frr	0	0	Accessory
fruA	0	0	Accessory
fruA~~~luxR	3	30	Accessory
frvX	10	100	Core
fsa	0	0	Accessory
fszA	0	0	Accessory
ftcD	0	0	Accessory
ftf	0	0	Accessory
ftsA	10	100	Core
ftsB	0	0	Accessory
ftsE	0	0	Accessory
ftsH	0	0	Accessory
ftsJ	0	0	Accessory
ftsK	1	10	Accessory
ftsL	0	0	Accessory
ftsQ	0	0	Accessory
ftsW	10	100	Core
ftsX	0	0	Accessory
ftsY	10	100	Core
ftsZ	0	0	Accessory
ftsZ~~~murF	0	0	Accessory
fucI	0	0	Accessory
fucO	0	0	Accessory
fucO~~~gldA	6	60	Accessory
funZ	0	0	Accessory
fur	0	0	Accessory
fusA	0	0	Accessory
galA	9	90	Accessory
galE	0	0	Accessory
galK	0	0	Accessory
galM	10	100	Core
galR	0	0	Accessory
galT	0	0	Accessory
galT2~~~galT	10	100	Core
galU	10	100	Core
ganA	10	100	Core
gap	0	0	Accessory
gapN	0	0	Accessory
gatA	0	0	Accessory
gatB	0	0	Accessory
gatC	0	0	Accessory
gbpC	0	0	Accessory
gdhA	10	100	Core
gdmH	0	0	Accessory
gdpP	10	100	Core
gldA	0	0	Accessory
glf	0	0	Accessory
glgA	10	100	Core
glgB	10	100	Core
glgC	10	100	Core
glgD	10	100	Core
glgP	0	0	Accessory
glmM	0	0	Accessory
glmS	10	100	Core
glmU	10	100	Core
glnA	0	0	Accessory
glnH	4	40	Accessory
glnK	0	0	Accessory
glnQ	4	40	Accessory
glnQ~~~artM	8	80	Accessory
glnQ~~~yxeN	0	0	Accessory
glnR	0	0	Accessory
glnR~~~merR	10	100	Core
gloA	0	0	Accessory
gloB	10	100	Core
gloB~~~yqgX	0	0	Accessory
glpE	10	100	Core
glpE~~~moeZ~~~pspE	10	100	Core
glpF	10	100	Core
glpG	10	100	Core
glpK	7	70	Accessory
glpO	7	70	Accessory
glpR	0	0	Accessory
gltA	0	0	Accessory
gltB	0	0	Accessory
gltC	0	0	Accessory
gltD	0	0	Accessory
gltX	10	100	Core
gluP	0	0	Accessory
glvR	0	0	Accessory
glxK	0	0	Accessory
gly	0	0	Accessory
glyA	10	100	Core
glyE	0	0	Accessory
glyG	0	0	Accessory
glyP~~~alsT	10	100	Core
glyQ	10	100	Core
glyS	0	0	Accessory
gmk	10	100	Core
gmuD	0	0	Accessory
gndA	10	100	Core
gntR	1	10	Accessory
gntR~~~aRO8	0	0	Accessory
gntR~~~ubiC	10	100	Core
gntR~~~ytrA~~~yhcF	10	100	Core
gntR~~~yvoA~~~mngR	10	100	Core
gntX	0	0	Accessory
gor	10	100	Core
gorA	0	0	Accessory
gph	10	100	Core
gpmA	10	100	Core
gpmB2	0	0	Accessory
gpsA	10	100	Core
gpsB	10	100	Core
greA	10	100	Core
groES	10	100	Core
groL	10	100	Core
group_0	0	0	Accessory
group_1	3	30	Accessory
group_10	0	0	Accessory
group_100	0	0	Accessory
group_1000	0	0	Accessory
group_10000	0	0	Accessory
group_10001	0	0	Accessory
group_10002	0	0	Accessory
group_10003	0	0	Accessory
group_10004	0	0	Accessory
group_10005	0	0	Accessory
group_10006	0	0	Accessory
group_10007	0	0	Accessory
group_10008	3	30	Accessory
group_10009	0	0	Accessory
group_1001	0	0	Accessory
group_10010	0	0	Accessory
group_10011	0	0	Accessory
group_10012	0	0	Accessory
group_10013	0	0	Accessory
group_10014	0	0	Accessory
group_10015	0	0	Accessory
group_10016	0	0	Accessory
group_10017	0	0	Accessory
group_10018	0	0	Accessory
group_10019	0	0	Accessory
group_1002	1	10	Accessory
group_10020	0	0	Accessory
group_10021	0	0	Accessory
group_10022	0	0	Accessory
group_10023	0	0	Accessory
group_10024	0	0	Accessory
group_10025	0	0	Accessory
group_10026	0	0	Accessory
group_10027	0	0	Accessory
group_10028	0	0	Accessory
group_10029	0	0	Accessory
group_1003	0	0	Accessory
group_10030	0	0	Accessory
group_10031	0	0	Accessory
group_10032	0	0	Accessory
group_10033	0	0	Accessory
group_10034	0	0	Accessory
group_10035	0	0	Accessory
group_10036	0	0	Accessory
group_10037	0	0	Accessory
group_10038	0	0	Accessory
group_10039	0	0	Accessory
group_1004	0	0	Accessory
group_10040	0	0	Accessory
group_10041	0	0	Accessory
group_10042	0	0	Accessory
group_10043	0	0	Accessory
group_10044	0	0	Accessory
group_10045	3	30	Accessory
group_10046	0	0	Accessory
group_10047	0	0	Accessory
group_10048	0	0	Accessory
group_10049	0	0	Accessory
group_1005	0	0	Accessory
group_10050	0	0	Accessory
group_10051	0	0	Accessory
group_10052	0	0	Accessory
group_10053	0	0	Accessory
group_10054	0	0	Accessory
group_10055	0	0	Accessory
group_10056	0	0	Accessory
group_10057	0	0	Accessory
group_10058	0	0	Accessory
group_10059	0	0	Accessory
group_1006	1	10	Accessory
group_10060	0	0	Accessory
group_10061	0	0	Accessory
group_10062	0	0	Accessory
group_10063	0	0	Accessory
group_10064	0	0	Accessory
group_10065	0	0	Accessory
group_10066	1	10	Accessory
group_10067	0	0	Accessory
group_10068	0	0	Accessory
group_10069	0	0	Accessory
group_1007	0	0	Accessory
group_10070	0	0	Accessory
group_10071	0	0	Accessory
group_10072	0	0	Accessory
group_10073	0	0	Accessory
group_10074	0	0	Accessory
group_10075	0	0	Accessory
group_10076	0	0	Accessory
group_10077	0	0	Accessory
group_10078	5	50	Accessory
group_10079	0	0	Accessory
group_1008	1	10	Accessory
group_10080	0	0	Accessory
group_10081	0	0	Accessory
group_10082	0	0	Accessory
group_10083	0	0	Accessory
group_10084	0	0	Accessory
group_10085	0	0	Accessory
group_10086	0	0	Accessory
group_10087	0	0	Accessory
group_10088	0	0	Accessory
group_10089	1	10	Accessory
group_1009	0	0	Accessory
group_10090	0	0	Accessory
group_10091	0	0	Accessory
group_10092	0	0	Accessory
group_10093	0	0	Accessory
group_10094	0	0	Accessory
group_10095	0	0	Accessory
group_10096	0	0	Accessory
group_10097	0	0	Accessory
group_10098	0	0	Accessory
group_10099	0	0	Accessory
group_101	0	0	Accessory
group_1010	0	0	Accessory
group_10100	0	0	Accessory
group_10101	1	10	Accessory
group_10102	0	0	Accessory
group_10103	0	0	Accessory
group_10104	0	0	Accessory
group_10105	0	0	Accessory
group_10106	0	0	Accessory
group_10107	0	0	Accessory
group_10108	0	0	Accessory
group_10109	0	0	Accessory
group_1011	0	0	Accessory
group_10110	0	0	Accessory
group_10111	0	0	Accessory
group_10112	0	0	Accessory
group_10113	0	0	Accessory
group_10114	0	0	Accessory
group_10115	0	0	Accessory
group_10116	0	0	Accessory
group_10117	0	0	Accessory
group_10118	0	0	Accessory
group_10119	0	0	Accessory
group_1012	0	0	Accessory
group_10120	0	0	Accessory
group_10121	0	0	Accessory
group_10122	0	0	Accessory
group_10123	0	0	Accessory
group_10124	0	0	Accessory
group_10125	0	0	Accessory
group_10126	0	0	Accessory
group_10127	0	0	Accessory
group_10128	0	0	Accessory
group_10129	0	0	Accessory
group_1013	1	10	Accessory
group_10130	0	0	Accessory
group_10131	1	10	Accessory
group_10132	0	0	Accessory
group_10133	0	0	Accessory
group_10134	0	0	Accessory
group_10135	0	0	Accessory
group_10136	0	0	Accessory
group_10137	0	0	Accessory
group_10138	0	0	Accessory
group_10139	0	0	Accessory
group_1014	1	10	Accessory
group_10140	0	0	Accessory
group_10141	0	0	Accessory
group_10142	0	0	Accessory
group_10143	0	0	Accessory
group_10144	0	0	Accessory
group_10145	0	0	Accessory
group_10146	0	0	Accessory
group_10147	0	0	Accessory
group_10148	0	0	Accessory
group_10149	0	0	Accessory
group_1015	1	10	Accessory
group_10150	0	0	Accessory
group_10151	0	0	Accessory
group_10152	0	0	Accessory
group_10153	0	0	Accessory
group_10154	0	0	Accessory
group_10155	0	0	Accessory
group_10156	0	0	Accessory
group_10157	0	0	Accessory
group_10158	0	0	Accessory
group_10159	0	0	Accessory
group_1016	1	10	Accessory
group_10160	0	0	Accessory
group_10161	0	0	Accessory
group_10162	0	0	Accessory
group_10163	0	0	Accessory
group_10164	0	0	Accessory
group_10165	0	0	Accessory
group_10166	0	0	Accessory
group_10167	0	0	Accessory
group_10168	0	0	Accessory
group_10169	0	0	Accessory
group_1017	0	0	Accessory
group_10170	0	0	Accessory
group_10171	0	0	Accessory
group_10172	1	10	Accessory
group_10173	0	0	Accessory
group_10174	0	0	Accessory
group_10175	0	0	Accessory
group_10176	3	30	Accessory
group_10177	0	0	Accessory
group_10178	0	0	Accessory
group_10179	0	0	Accessory
group_1018	0	0	Accessory
group_10180	0	0	Accessory
group_10181	0	0	Accessory
group_10182	0	0	Accessory
group_10183	0	0	Accessory
group_10184	0	0	Accessory
group_10185	0	0	Accessory
group_10186	0	0	Accessory
group_10187	0	0	Accessory
group_10188	0	0	Accessory
group_10189	0	0	Accessory
group_1019	0	0	Accessory
group_10190	0	0	Accessory
group_10191	0	0	Accessory
group_10192	0	0	Accessory
group_10193	0	0	Accessory
group_10194	1	10	Accessory
group_10195	0	0	Accessory
group_10196	0	0	Accessory
group_10197	0	0	Accessory
group_10198	0	0	Accessory
group_10199	0	0	Accessory
group_102	0	0	Accessory
group_1020	1	10	Accessory
group_10200	0	0	Accessory
group_10201	0	0	Accessory
group_10202	0	0	Accessory
group_10203	0	0	Accessory
group_10204	0	0	Accessory
group_10205	0	0	Accessory
group_10206	0	0	Accessory
group_10207	0	0	Accessory
group_10208	0	0	Accessory
group_10209	0	0	Accessory
group_1021	1	10	Accessory
group_10210	0	0	Accessory
group_10211	0	0	Accessory
group_10212	0	0	Accessory
group_10213	0	0	Accessory
group_10214	0	0	Accessory
group_10215	0	0	Accessory
group_10216	0	0	Accessory
group_10217	0	0	Accessory
group_10218	0	0	Accessory
group_10219	0	0	Accessory
group_1022	10	100	Core
group_10220	0	0	Accessory
group_10221	0	0	Accessory
group_10222	0	0	Accessory
group_10223	0	0	Accessory
group_10224	0	0	Accessory
group_10225	0	0	Accessory
group_10226	0	0	Accessory
group_10227	0	0	Accessory
group_10228	0	0	Accessory
group_10229	0	0	Accessory
group_1023	0	0	Accessory
group_10230	0	0	Accessory
group_10231	0	0	Accessory
group_10232	0	0	Accessory
group_10233	0	0	Accessory
group_10234	0	0	Accessory
group_10235	2	20	Accessory
group_10236	0	0	Accessory
group_10237	0	0	Accessory
group_10238	0	0	Accessory
group_10239	0	0	Accessory
group_1024	7	70	Accessory
group_10240	0	0	Accessory
group_10241	0	0	Accessory
group_10242	0	0	Accessory
group_10243	0	0	Accessory
group_10244	0	0	Accessory
group_10245	0	0	Accessory
group_10246	0	0	Accessory
group_10247	0	0	Accessory
group_10248	1	10	Accessory
group_10249	1	10	Accessory
group_1025	0	0	Accessory
group_10250	0	0	Accessory
group_10251	0	0	Accessory
group_10252	0	0	Accessory
group_10253	0	0	Accessory
group_10254	0	0	Accessory
group_10255	3	30	Accessory
group_10256	0	0	Accessory
group_10257	0	0	Accessory
group_10258	0	0	Accessory
group_10259	0	0	Accessory
group_1026	0	0	Accessory
group_10260	0	0	Accessory
group_10261	0	0	Accessory
group_10262	0	0	Accessory
group_10263	0	0	Accessory
group_10264	0	0	Accessory
group_10265	0	0	Accessory
group_10266	0	0	Accessory
group_10267	0	0	Accessory
group_10268	0	0	Accessory
group_10269	0	0	Accessory
group_1027	0	0	Accessory
group_10270	0	0	Accessory
group_10271	0	0	Accessory
group_10272	1	10	Accessory
group_10273	0	0	Accessory
group_10274	0	0	Accessory
group_10275	0	0	Accessory
group_10276	0	0	Accessory
group_10277	2	20	Accessory
group_10278	1	10	Accessory
group_10279	0	0	Accessory
group_1028	0	0	Accessory
group_10280	0	0	Accessory
group_10281	0	0	Accessory
group_10282	0	0	Accessory
group_10283	0	0	Accessory
group_10284	0	0	Accessory
group_10285	0	0	Accessory
group_10286	1	10	Accessory
group_10287	0	0	Accessory
group_10288	0	0	Accessory
group_10289	0	0	Accessory
group_1029	0	0	Accessory
group_10290	0	0	Accessory
group_10291	0	0	Accessory
group_10292	0	0	Accessory
group_10293	0	0	Accessory
group_10294	0	0	Accessory
group_10295	0	0	Accessory
group_10296	0	0	Accessory
group_10297	0	0	Accessory
group_10298	0	0	Accessory
group_10299	0	0	Accessory
group_103	4	40	Accessory
group_1030	1	10	Accessory
group_10300	0	0	Accessory
group_10301	0	0	Accessory
group_10302	0	0	Accessory
group_10303	0	0	Accessory
group_10304	0	0	Accessory
group_10305	0	0	Accessory
group_10306	0	0	Accessory
group_10307	0	0	Accessory
group_10308	0	0	Accessory
group_10309	0	0	Accessory
group_1031	0	0	Accessory
group_10310	0	0	Accessory
group_10311	0	0	Accessory
group_10312	0	0	Accessory
group_10313	0	0	Accessory
group_10314	0	0	Accessory
group_10315	0	0	Accessory
group_10316	0	0	Accessory
group_10317	0	0	Accessory
group_10318	0	0	Accessory
group_10319	0	0	Accessory
group_1032	0	0	Accessory
group_10320	0	0	Accessory
group_10321	0	0	Accessory
group_10322	0	0	Accessory
group_10323	3	30	Accessory
group_10324	0	0	Accessory
group_10325	0	0	Accessory
group_10326	0	0	Accessory
group_10327	0	0	Accessory
group_10328	0	0	Accessory
group_10329	0	0	Accessory
group_1033	0	0	Accessory
group_10330	0	0	Accessory
group_10331	0	0	Accessory
group_10332	0	0	Accessory
group_10333	1	10	Accessory
group_10334	0	0	Accessory
group_10335	0	0	Accessory
group_10336	0	0	Accessory
group_10337	0	0	Accessory
group_10338	0	0	Accessory
group_10339	0	0	Accessory
group_1034	0	0	Accessory
group_10340	0	0	Accessory
group_10341	0	0	Accessory
group_10342	0	0	Accessory
group_10343	0	0	Accessory
group_10344	0	0	Accessory
group_10345	1	10	Accessory
group_10346	0	0	Accessory
group_10347	0	0	Accessory
group_10348	0	0	Accessory
group_10349	3	30	Accessory
group_1035	0	0	Accessory
group_10350	0	0	Accessory
group_10351	0	0	Accessory
group_10352	0	0	Accessory
group_10353	0	0	Accessory
group_10354	0	0	Accessory
group_10355	0	0	Accessory
group_10356	0	0	Accessory
group_10357	0	0	Accessory
group_10358	0	0	Accessory
group_10359	0	0	Accessory
group_1036	0	0	Accessory
group_10360	0	0	Accessory
group_10361	0	0	Accessory
group_10362	0	0	Accessory
group_10363	0	0	Accessory
group_10364	0	0	Accessory
group_10365	0	0	Accessory
group_10366	0	0	Accessory
group_10367	0	0	Accessory
group_10368	0	0	Accessory
group_10369	0	0	Accessory
group_1037	0	0	Accessory
group_10370	0	0	Accessory
group_10371	0	0	Accessory
group_10372	0	0	Accessory
group_10373	0	0	Accessory
group_10374	0	0	Accessory
group_10375	0	0	Accessory
group_10376	0	0	Accessory
group_10377	0	0	Accessory
group_10378	0	0	Accessory
group_10379	0	0	Accessory
group_1038	0	0	Accessory
group_10380	0	0	Accessory
group_10381	0	0	Accessory
group_10382	0	0	Accessory
group_10383	0	0	Accessory
group_10384	0	0	Accessory
group_10385	0	0	Accessory
group_10386	0	0	Accessory
group_10387	0	0	Accessory
group_10388	0	0	Accessory
group_10389	0	0	Accessory
group_1039	0	0	Accessory
group_10390	0	0	Accessory
group_10391	0	0	Accessory
group_10392	0	0	Accessory
group_10393	0	0	Accessory
group_10394	0	0	Accessory
group_10395	0	0	Accessory
group_10396	0	0	Accessory
group_10397	0	0	Accessory
group_10398	0	0	Accessory
group_10399	0	0	Accessory
group_104	0	0	Accessory
group_1040	0	0	Accessory
group_10400	0	0	Accessory
group_10401	0	0	Accessory
group_10402	0	0	Accessory
group_10403	0	0	Accessory
group_10404	0	0	Accessory
group_10405	0	0	Accessory
group_10406	0	0	Accessory
group_10407	0	0	Accessory
group_10408	0	0	Accessory
group_10409	0	0	Accessory
group_1041	0	0	Accessory
group_10410	0	0	Accessory
group_10411	0	0	Accessory
group_10412	0	0	Accessory
group_10413	0	0	Accessory
group_10414	0	0	Accessory
group_10415	0	0	Accessory
group_10416	0	0	Accessory
group_10417	0	0	Accessory
group_10418	0	0	Accessory
group_10419	1	10	Accessory
group_1042	0	0	Accessory
group_10420	0	0	Accessory
group_10421	0	0	Accessory
group_10422	0	0	Accessory
group_10423	0	0	Accessory
group_10424	0	0	Accessory
group_10425	0	0	Accessory
group_10426	0	0	Accessory
group_10427	0	0	Accessory
group_10428	0	0	Accessory
group_10429	0	0	Accessory
group_1043	0	0	Accessory
group_10430	0	0	Accessory
group_10431	0	0	Accessory
group_10432	0	0	Accessory
group_10433	0	0	Accessory
group_10434	0	0	Accessory
group_10435	0	0	Accessory
group_10436	0	0	Accessory
group_10437	0	0	Accessory
group_10438	0	0	Accessory
group_10439	0	0	Accessory
group_1044	1	10	Accessory
group_10440	0	0	Accessory
group_10441	0	0	Accessory
group_10442	0	0	Accessory
group_10443	0	0	Accessory
group_10444	0	0	Accessory
group_10445	0	0	Accessory
group_10446	2	20	Accessory
group_10447	0	0	Accessory
group_10448	0	0	Accessory
group_10449	0	0	Accessory
group_1045	0	0	Accessory
group_10450	0	0	Accessory
group_10451	0	0	Accessory
group_10452	0	0	Accessory
group_10453	0	0	Accessory
group_10454	0	0	Accessory
group_10455	0	0	Accessory
group_10456	0	0	Accessory
group_10457	0	0	Accessory
group_10458	0	0	Accessory
group_10459	0	0	Accessory
group_1046	0	0	Accessory
group_10460	0	0	Accessory
group_10461	1	10	Accessory
group_10462	0	0	Accessory
group_10463	0	0	Accessory
group_10464	0	0	Accessory
group_10465	0	0	Accessory
group_10466	0	0	Accessory
group_10467	0	0	Accessory
group_10468	0	0	Accessory
group_10469	0	0	Accessory
group_1047	1	10	Accessory
group_10470	0	0	Accessory
group_10471	0	0	Accessory
group_10472	0	0	Accessory
group_10473	0	0	Accessory
group_10474	0	0	Accessory
group_10475	0	0	Accessory
group_10476	0	0	Accessory
group_10477	0	0	Accessory
group_10478	0	0	Accessory
group_10479	0	0	Accessory
group_1048	0	0	Accessory
group_10480	0	0	Accessory
group_10481	0	0	Accessory
group_10482	0	0	Accessory
group_10483	0	0	Accessory
group_10484	0	0	Accessory
group_10485	0	0	Accessory
group_10486	0	0	Accessory
group_10487	0	0	Accessory
group_10488	0	0	Accessory
group_10489	0	0	Accessory
group_1049	0	0	Accessory
group_10490	1	10	Accessory
group_10491	0	0	Accessory
group_10492	0	0	Accessory
group_10493	0	0	Accessory
group_10494	0	0	Accessory
group_10495	0	0	Accessory
group_10496	0	0	Accessory
group_10497	0	0	Accessory
group_10498	0	0	Accessory
group_10499	0	0	Accessory
group_105	0	0	Accessory
group_1050	1	10	Accessory
group_10500	0	0	Accessory
group_10501	0	0	Accessory
group_10502	0	0	Accessory
group_10503	1	10	Accessory
group_10504	1	10	Accessory
group_10505	1	10	Accessory
group_10506	0	0	Accessory
group_10507	1	10	Accessory
group_10508	0	0	Accessory
group_10509	0	0	Accessory
group_1051	0	0	Accessory
group_10510	0	0	Accessory
group_10511	0	0	Accessory
group_10512	0	0	Accessory
group_10513	0	0	Accessory
group_10514	0	0	Accessory
group_10515	0	0	Accessory
group_10516	0	0	Accessory
group_10517	0	0	Accessory
group_10518	0	0	Accessory
group_10519	0	0	Accessory
group_1052	0	0	Accessory
group_10520	0	0	Accessory
group_10521	0	0	Accessory
group_10522	0	0	Accessory
group_10523	0	0	Accessory
group_10524	0	0	Accessory
group_10525	0	0	Accessory
group_10526	0	0	Accessory
group_10527	0	0	Accessory
group_10528	0	0	Accessory
group_10529	0	0	Accessory
group_1053	1	10	Accessory
group_10530	0	0	Accessory
group_10531	1	10	Accessory
group_10532	0	0	Accessory
group_10533	0	0	Accessory
group_10534	0	0	Accessory
group_10535	0	0	Accessory
group_10536	0	0	Accessory
group_10537	0	0	Accessory
group_10538	0	0	Accessory
group_10539	0	0	Accessory
group_1054	0	0	Accessory
group_10540	0	0	Accessory
group_10541	1	10	Accessory
group_10542	1	10	Accessory
group_10543	0	0	Accessory
group_10544	0	0	Accessory
group_10545	0	0	Accessory
group_10546	0	0	Accessory
group_10547	0	0	Accessory
group_10548	0	0	Accessory
group_10549	0	0	Accessory
group_1055	0	0	Accessory
group_10550	0	0	Accessory
group_10551	0	0	Accessory
group_10552	0	0	Accessory
group_10553	0	0	Accessory
group_10554	0	0	Accessory
group_10555	0	0	Accessory
group_10556	0	0	Accessory
group_10557	0	0	Accessory
group_10558	0	0	Accessory
group_10559	0	0	Accessory
group_1056	0	0	Accessory
group_10560	0	0	Accessory
group_10561	0	0	Accessory
group_10562	0	0	Accessory
group_10563	0	0	Accessory
group_10564	0	0	Accessory
group_10565	0	0	Accessory
group_10566	0	0	Accessory
group_10567	0	0	Accessory
group_10568	0	0	Accessory
group_10569	0	0	Accessory
group_1057	1	10	Accessory
group_10570	0	0	Accessory
group_10571	0	0	Accessory
group_10572	0	0	Accessory
group_10573	0	0	Accessory
group_10574	0	0	Accessory
group_10575	0	0	Accessory
group_10576	1	10	Accessory
group_10577	1	10	Accessory
group_10578	0	0	Accessory
group_10579	0	0	Accessory
group_1058	3	30	Accessory
group_10580	0	0	Accessory
group_10581	1	10	Accessory
group_10582	1	10	Accessory
group_10583	0	0	Accessory
group_10584	0	0	Accessory
group_10585	0	0	Accessory
group_10586	0	0	Accessory
group_10587	0	0	Accessory
group_10588	0	0	Accessory
group_10589	0	0	Accessory
group_1059	0	0	Accessory
group_10590	0	0	Accessory
group_10591	0	0	Accessory
group_10592	0	0	Accessory
group_10593	0	0	Accessory
group_10594	0	0	Accessory
group_10595	0	0	Accessory
group_10596	0	0	Accessory
group_10597	0	0	Accessory
group_10598	0	0	Accessory
group_10599	0	0	Accessory
group_106	0	0	Accessory
group_1060	0	0	Accessory
group_10600	0	0	Accessory
group_10601	0	0	Accessory
group_10602	0	0	Accessory
group_10603	0	0	Accessory
group_10604	0	0	Accessory
group_10605	1	10	Accessory
group_10606	0	0	Accessory
group_10607	0	0	Accessory
group_10608	0	0	Accessory
group_10609	0	0	Accessory
group_1061	0	0	Accessory
group_10610	0	0	Accessory
group_10611	0	0	Accessory
group_10612	0	0	Accessory
group_10613	0	0	Accessory
group_10614	0	0	Accessory
group_10615	0	0	Accessory
group_10616	0	0	Accessory
group_10617	0	0	Accessory
group_10618	0	0	Accessory
group_10619	0	0	Accessory
group_1062	0	0	Accessory
group_10620	0	0	Accessory
group_10621	0	0	Accessory
group_10622	1	10	Accessory
group_10623	0	0	Accessory
group_10624	0	0	Accessory
group_10625	0	0	Accessory
group_10626	0	0	Accessory
group_10627	0	0	Accessory
group_10628	0	0	Accessory
group_10629	0	0	Accessory
group_1063	0	0	Accessory
group_10630	0	0	Accessory
group_10631	0	0	Accessory
group_10632	0	0	Accessory
group_10633	1	10	Accessory
group_10634	0	0	Accessory
group_10635	0	0	Accessory
group_10636	0	0	Accessory
group_10637	0	0	Accessory
group_10638	0	0	Accessory
group_10639	0	0	Accessory
group_1064	0	0	Accessory
group_10640	0	0	Accessory
group_10641	0	0	Accessory
group_10642	1	10	Accessory
group_10643	0	0	Accessory
group_10644	0	0	Accessory
group_10645	0	0	Accessory
group_10646	0	0	Accessory
group_10647	0	0	Accessory
group_10648	0	0	Accessory
group_10649	0	0	Accessory
group_1065	0	0	Accessory
group_10650	0	0	Accessory
group_10651	0	0	Accessory
group_10652	0	0	Accessory
group_10653	0	0	Accessory
group_10654	0	0	Accessory
group_10655	0	0	Accessory
group_10656	0	0	Accessory
group_10657	0	0	Accessory
group_10658	0	0	Accessory
group_10659	0	0	Accessory
group_1066	0	0	Accessory
group_10660	0	0	Accessory
group_10661	0	0	Accessory
group_10662	1	10	Accessory
group_10663	1	10	Accessory
group_10664	1	10	Accessory
group_10665	0	0	Accessory
group_10666	0	0	Accessory
group_10667	0	0	Accessory
group_10668	0	0	Accessory
group_10669	0	0	Accessory
group_1067	0	0	Accessory
group_10670	0	0	Accessory
group_10671	0	0	Accessory
group_10672	0	0	Accessory
group_10673	0	0	Accessory
group_10674	0	0	Accessory
group_10675	0	0	Accessory
group_10676	0	0	Accessory
group_10677	2	20	Accessory
group_10678	1	10	Accessory
group_10679	0	0	Accessory
group_1068	0	0	Accessory
group_10680	0	0	Accessory
group_10681	0	0	Accessory
group_10682	0	0	Accessory
group_10683	0	0	Accessory
group_10684	0	0	Accessory
group_10685	0	0	Accessory
group_10686	0	0	Accessory
group_10687	0	0	Accessory
group_10688	0	0	Accessory
group_10689	0	0	Accessory
group_1069	0	0	Accessory
group_10690	1	10	Accessory
group_10691	0	0	Accessory
group_10692	1	10	Accessory
group_10693	0	0	Accessory
group_10694	0	0	Accessory
group_10695	3	30	Accessory
group_10696	0	0	Accessory
group_10697	0	0	Accessory
group_10698	0	0	Accessory
group_10699	0	0	Accessory
group_107	0	0	Accessory
group_1070	0	0	Accessory
group_10700	0	0	Accessory
group_10701	0	0	Accessory
group_10702	0	0	Accessory
group_10703	0	0	Accessory
group_10704	0	0	Accessory
group_10705	0	0	Accessory
group_10706	0	0	Accessory
group_10707	0	0	Accessory
group_10708	0	0	Accessory
group_10709	0	0	Accessory
group_1071	0	0	Accessory
group_10710	0	0	Accessory
group_10711	0	0	Accessory
group_10712	0	0	Accessory
group_10713	0	0	Accessory
group_10714	0	0	Accessory
group_10715	0	0	Accessory
group_10716	1	10	Accessory
group_10717	0	0	Accessory
group_10718	0	0	Accessory
group_10719	0	0	Accessory
group_1072	0	0	Accessory
group_10720	0	0	Accessory
group_10721	0	0	Accessory
group_10722	0	0	Accessory
group_10723	0	0	Accessory
group_10724	0	0	Accessory
group_10725	0	0	Accessory
group_10726	0	0	Accessory
group_10727	0	0	Accessory
group_10728	1	10	Accessory
group_10729	1	10	Accessory
group_1073	0	0	Accessory
group_10730	0	0	Accessory
group_10731	0	0	Accessory
group_10732	0	0	Accessory
group_10733	0	0	Accessory
group_10734	0	0	Accessory
group_10735	0	0	Accessory
group_10736	0	0	Accessory
group_10737	0	0	Accessory
group_10738	0	0	Accessory
group_10739	0	0	Accessory
group_1074	1	10	Accessory
group_10740	0	0	Accessory
group_10741	1	10	Accessory
group_10742	0	0	Accessory
group_10743	0	0	Accessory
group_10744	0	0	Accessory
group_10745	3	30	Accessory
group_10746	4	40	Accessory
group_10747	0	0	Accessory
group_10748	0	0	Accessory
group_10749	0	0	Accessory
group_1075	1	10	Accessory
group_10750	0	0	Accessory
group_10751	0	0	Accessory
group_10752	0	0	Accessory
group_10753	0	0	Accessory
group_10754	0	0	Accessory
group_10755	0	0	Accessory
group_10756	1	10	Accessory
group_10757	1	10	Accessory
group_10758	0	0	Accessory
group_10759	0	0	Accessory
group_1076	0	0	Accessory
group_10760	0	0	Accessory
group_10761	0	0	Accessory
group_10762	0	0	Accessory
group_10763	0	0	Accessory
group_10764	1	10	Accessory
group_10765	1	10	Accessory
group_10766	0	0	Accessory
group_10767	0	0	Accessory
group_10768	0	0	Accessory
group_10769	0	0	Accessory
group_1077	0	0	Accessory
group_10770	0	0	Accessory
group_10771	0	0	Accessory
group_10772	0	0	Accessory
group_10773	0	0	Accessory
group_10774	0	0	Accessory
group_10775	0	0	Accessory
group_10776	0	0	Accessory
group_10777	0	0	Accessory
group_10778	0	0	Accessory
group_10779	0	0	Accessory
group_1078	0	0	Accessory
group_10780	0	0	Accessory
group_10781	0	0	Accessory
group_10782	0	0	Accessory
group_10783	1	10	Accessory
group_10784	0	0	Accessory
group_10785	0	0	Accessory
group_10786	0	0	Accessory
group_10787	0	0	Accessory
group_10788	1	10	Accessory
group_10789	0	0	Accessory
group_1079	0	0	Accessory
group_10790	0	0	Accessory
group_10791	0	0	Accessory
group_10792	0	0	Accessory
group_10793	0	0	Accessory
group_10794	0	0	Accessory
group_10795	0	0	Accessory
group_10796	0	0	Accessory
group_10797	0	0	Accessory
group_10798	0	0	Accessory
group_10799	0	0	Accessory
group_108	0	0	Accessory
group_1080	0	0	Accessory
group_10800	0	0	Accessory
group_10801	0	0	Accessory
group_10802	0	0	Accessory
group_10803	1	10	Accessory
group_10804	0	0	Accessory
group_10805	0	0	Accessory
group_10806	0	0	Accessory
group_10807	0	0	Accessory
group_10808	0	0	Accessory
group_10809	0	0	Accessory
group_1081	0	0	Accessory
group_10810	1	10	Accessory
group_10811	0	0	Accessory
group_10812	0	0	Accessory
group_10813	0	0	Accessory
group_10814	0	0	Accessory
group_10815	0	0	Accessory
group_10816	0	0	Accessory
group_10817	0	0	Accessory
group_10818	0	0	Accessory
group_10819	0	0	Accessory
group_1082	0	0	Accessory
group_10820	0	0	Accessory
group_10821	1	10	Accessory
group_10822	1	10	Accessory
group_10823	1	10	Accessory
group_10824	0	0	Accessory
group_10825	0	0	Accessory
group_10826	0	0	Accessory
group_10827	0	0	Accessory
group_10828	0	0	Accessory
group_10829	0	0	Accessory
group_1083	1	10	Accessory
group_10830	0	0	Accessory
group_10831	0	0	Accessory
group_10832	0	0	Accessory
group_10833	0	0	Accessory
group_10834	0	0	Accessory
group_10835	0	0	Accessory
group_10836	0	0	Accessory
group_10837	0	0	Accessory
group_10838	0	0	Accessory
group_10839	0	0	Accessory
group_1084	0	0	Accessory
group_10840	0	0	Accessory
group_10841	0	0	Accessory
group_10842	0	0	Accessory
group_10843	0	0	Accessory
group_10844	0	0	Accessory
group_10845	0	0	Accessory
group_10846	0	0	Accessory
group_10847	0	0	Accessory
group_10848	0	0	Accessory
group_10849	0	0	Accessory
group_1085	0	0	Accessory
group_10850	0	0	Accessory
group_10851	0	0	Accessory
group_10852	0	0	Accessory
group_10853	0	0	Accessory
group_10854	2	20	Accessory
group_10855	1	10	Accessory
group_10856	1	10	Accessory
group_10857	1	10	Accessory
group_10858	0	0	Accessory
group_10859	0	0	Accessory
group_1086	0	0	Accessory
group_10860	0	0	Accessory
group_10861	0	0	Accessory
group_10862	0	0	Accessory
group_10863	0	0	Accessory
group_10864	0	0	Accessory
group_10865	0	0	Accessory
group_10866	0	0	Accessory
group_10867	0	0	Accessory
group_10868	0	0	Accessory
group_10869	0	0	Accessory
group_1087	0	0	Accessory
group_10870	0	0	Accessory
group_10871	0	0	Accessory
group_10872	0	0	Accessory
group_10873	0	0	Accessory
group_10874	0	0	Accessory
group_10875	0	0	Accessory
group_10876	0	0	Accessory
group_10877	0	0	Accessory
group_10878	0	0	Accessory
group_10879	0	0	Accessory
group_1088	0	0	Accessory
group_10880	0	0	Accessory
group_10881	0	0	Accessory
group_10882	0	0	Accessory
group_10883	0	0	Accessory
group_10884	0	0	Accessory
group_10885	1	10	Accessory
group_10886	1	10	Accessory
group_10887	0	0	Accessory
group_10888	2	20	Accessory
group_10889	0	0	Accessory
group_1089	0	0	Accessory
group_10890	0	0	Accessory
group_10891	0	0	Accessory
group_10892	0	0	Accessory
group_10893	0	0	Accessory
group_10894	0	0	Accessory
group_10895	2	20	Accessory
group_10896	0	0	Accessory
group_10897	0	0	Accessory
group_10898	0	0	Accessory
group_10899	0	0	Accessory
group_109	0	0	Accessory
group_1090	0	0	Accessory
group_10900	0	0	Accessory
group_10901	0	0	Accessory
group_10902	0	0	Accessory
group_10903	0	0	Accessory
group_10904	0	0	Accessory
group_10905	0	0	Accessory
group_10906	0	0	Accessory
group_10907	0	0	Accessory
group_10908	0	0	Accessory
group_10909	1	10	Accessory
group_1091	0	0	Accessory
group_10910	0	0	Accessory
group_10911	0	0	Accessory
group_10912	0	0	Accessory
group_10913	0	0	Accessory
group_10914	0	0	Accessory
group_10915	3	30	Accessory
group_10916	0	0	Accessory
group_10917	0	0	Accessory
group_10918	0	0	Accessory
group_10919	0	0	Accessory
group_1092	0	0	Accessory
group_10920	0	0	Accessory
group_10921	2	20	Accessory
group_10922	0	0	Accessory
group_10923	0	0	Accessory
group_10924	0	0	Accessory
group_10925	0	0	Accessory
group_10926	0	0	Accessory
group_10927	0	0	Accessory
group_10928	0	0	Accessory
group_10929	0	0	Accessory
group_1093	0	0	Accessory
group_10930	0	0	Accessory
group_10931	0	0	Accessory
group_10932	0	0	Accessory
group_10933	0	0	Accessory
group_10934	0	0	Accessory
group_10935	0	0	Accessory
group_10936	0	0	Accessory
group_10937	0	0	Accessory
group_10938	0	0	Accessory
group_10939	1	10	Accessory
group_1094	0	0	Accessory
group_10940	0	0	Accessory
group_10941	0	0	Accessory
group_10942	0	0	Accessory
group_10943	0	0	Accessory
group_10944	0	0	Accessory
group_10945	0	0	Accessory
group_10946	0	0	Accessory
group_10947	0	0	Accessory
group_10948	0	0	Accessory
group_10949	0	0	Accessory
group_1095	2	20	Accessory
group_10950	0	0	Accessory
group_10951	0	0	Accessory
group_10952	0	0	Accessory
group_10953	0	0	Accessory
group_10954	0	0	Accessory
group_10955	0	0	Accessory
group_10956	0	0	Accessory
group_10957	0	0	Accessory
group_10958	0	0	Accessory
group_10959	0	0	Accessory
group_1096	0	0	Accessory
group_10960	0	0	Accessory
group_10961	0	0	Accessory
group_10962	0	0	Accessory
group_10963	2	20	Accessory
group_10964	1	10	Accessory
group_10965	0	0	Accessory
group_10966	0	0	Accessory
group_10967	0	0	Accessory
group_10968	0	0	Accessory
group_10969	0	0	Accessory
group_1097	0	0	Accessory
group_10970	0	0	Accessory
group_10971	0	0	Accessory
group_10972	0	0	Accessory
group_10973	1	10	Accessory
group_10974	1	10	Accessory
group_10975	0	0	Accessory
group_10976	0	0	Accessory
group_10977	0	0	Accessory
group_10978	1	10	Accessory
group_10979	0	0	Accessory
group_1098	0	0	Accessory
group_10980	0	0	Accessory
group_10981	0	0	Accessory
group_10982	0	0	Accessory
group_10983	0	0	Accessory
group_10984	0	0	Accessory
group_10985	0	0	Accessory
group_10986	0	0	Accessory
group_10987	0	0	Accessory
group_10988	0	0	Accessory
group_10989	0	0	Accessory
group_1099	10	100	Core
group_10990	0	0	Accessory
group_10991	0	0	Accessory
group_10992	0	0	Accessory
group_10993	0	0	Accessory
group_10994	0	0	Accessory
group_10995	0	0	Accessory
group_10996	0	0	Accessory
group_10997	0	0	Accessory
group_10998	1	10	Accessory
group_10999	1	10	Accessory
group_11	0	0	Accessory
group_110	0	0	Accessory
group_1100	0	0	Accessory
group_11000	0	0	Accessory
group_11001	0	0	Accessory
group_11002	0	0	Accessory
group_11003	0	0	Accessory
group_11004	0	0	Accessory
group_11005	0	0	Accessory
group_11006	0	0	Accessory
group_11007	0	0	Accessory
group_11008	0	0	Accessory
group_11009	0	0	Accessory
group_1101	0	0	Accessory
group_11010	2	20	Accessory
group_11011	2	20	Accessory
group_11012	1	10	Accessory
group_11013	0	0	Accessory
group_11014	0	0	Accessory
group_11015	0	0	Accessory
group_11016	0	0	Accessory
group_11017	0	0	Accessory
group_11018	0	0	Accessory
group_11019	0	0	Accessory
group_1102	0	0	Accessory
group_11020	0	0	Accessory
group_11021	0	0	Accessory
group_11022	0	0	Accessory
group_11023	0	0	Accessory
group_11024	0	0	Accessory
group_11025	1	10	Accessory
group_11026	0	0	Accessory
group_11027	0	0	Accessory
group_11028	0	0	Accessory
group_11029	0	0	Accessory
group_1103	0	0	Accessory
group_11030	0	0	Accessory
group_11031	0	0	Accessory
group_11032	0	0	Accessory
group_11033	0	0	Accessory
group_11034	0	0	Accessory
group_11035	0	0	Accessory
group_11036	0	0	Accessory
group_11037	0	0	Accessory
group_11038	0	0	Accessory
group_11039	0	0	Accessory
group_1104	0	0	Accessory
group_11040	0	0	Accessory
group_11041	0	0	Accessory
group_11042	0	0	Accessory
group_11043	0	0	Accessory
group_11044	0	0	Accessory
group_11045	0	0	Accessory
group_11046	0	0	Accessory
group_11047	0	0	Accessory
group_11048	0	0	Accessory
group_11049	0	0	Accessory
group_1105	0	0	Accessory
group_11050	0	0	Accessory
group_11051	2	20	Accessory
group_11052	1	10	Accessory
group_11053	1	10	Accessory
group_11054	0	0	Accessory
group_11055	0	0	Accessory
group_11056	0	0	Accessory
group_11057	0	0	Accessory
group_11058	0	0	Accessory
group_11059	0	0	Accessory
group_1106	0	0	Accessory
group_11060	0	0	Accessory
group_11061	0	0	Accessory
group_11062	0	0	Accessory
group_11063	0	0	Accessory
group_11064	0	0	Accessory
group_11065	0	0	Accessory
group_11066	0	0	Accessory
group_11067	0	0	Accessory
group_11068	0	0	Accessory
group_11069	0	0	Accessory
group_1107	6	60	Accessory
group_11070	0	0	Accessory
group_11071	0	0	Accessory
group_11072	0	0	Accessory
group_11073	0	0	Accessory
group_11074	0	0	Accessory
group_11075	0	0	Accessory
group_11076	0	0	Accessory
group_11077	0	0	Accessory
group_11078	0	0	Accessory
group_11079	0	0	Accessory
group_1108	0	0	Accessory
group_11080	0	0	Accessory
group_11081	0	0	Accessory
group_11082	0	0	Accessory
group_11083	0	0	Accessory
group_11084	0	0	Accessory
group_11085	0	0	Accessory
group_11086	0	0	Accessory
group_11087	0	0	Accessory
group_11088	0	0	Accessory
group_11089	0	0	Accessory
group_1109	0	0	Accessory
group_11090	0	0	Accessory
group_11091	0	0	Accessory
group_11092	0	0	Accessory
group_11093	0	0	Accessory
group_11094	0	0	Accessory
group_11095	0	0	Accessory
group_11096	0	0	Accessory
group_11097	0	0	Accessory
group_11098	0	0	Accessory
group_11099	0	0	Accessory
group_111	0	0	Accessory
group_1110	3	30	Accessory
group_11100	0	0	Accessory
group_11101	0	0	Accessory
group_11102	0	0	Accessory
group_11103	0	0	Accessory
group_11104	0	0	Accessory
group_11105	0	0	Accessory
group_11106	0	0	Accessory
group_11107	0	0	Accessory
group_11108	0	0	Accessory
group_11109	0	0	Accessory
group_1111	4	40	Accessory
group_11110	0	0	Accessory
group_11111	0	0	Accessory
group_11112	0	0	Accessory
group_11113	0	0	Accessory
group_11114	0	0	Accessory
group_11115	0	0	Accessory
group_11116	0	0	Accessory
[truncated: 23,138 more rows]

## Sheet: Cluster 7
Supplementary Table 10: Core and accessory genes identified in Cluster 7
Gene	n_present	core_percentage	gene_type
aCT	12	85.7143	Accessory
aF0785	12	85.7143	Accessory
aF2118	2	14.2857	Accessory
aIM24	13	92.8571	Accessory
aRA1	0	0	Accessory
aRO8	1	7.14286	Accessory
aac6	1	7.14286	Accessory
aarF	0	0	Accessory
abcX	1	7.14286	Accessory
abcf	12	85.7143	Accessory
abgB	0	0	Accessory
abiF	1	7.14286	Accessory
abiH	0	0	Accessory
abiV	0	0	Accessory
abpA	0	0	Accessory
abrB	2	14.2857	Accessory
accA	12	85.7143	Accessory
accB	12	85.7143	Accessory
accC	1	7.14286	Accessory
accD	12	85.7143	Accessory
aceF	12	85.7143	Accessory
ackA	0	0	Accessory
acm	1	7.14286	Accessory
acnA	1	7.14286	Accessory
acoA	1	7.14286	Accessory
acoA~~~pdhA	12	85.7143	Accessory
acoB	12	85.7143	Accessory
acpA	0	0	Accessory
acpA~~~acpB	0	0	Accessory
acpB	0	0	Accessory
acpP	12	85.7143	Accessory
acpS	0	0	Accessory
acrA	1	7.14286	Accessory
acrIIA6	0	0	Accessory
acrR	0	0	Accessory
acrR~~~tetR	1	7.14286	Accessory
acuB	0	0	Accessory
acuB~~~cBS	12	85.7143	Accessory
acuI~~~yhfP	2	14.2857	Accessory
acyP	12	85.7143	Accessory
adaA	0	0	Accessory
adaB	1	7.14286	Accessory
adcA	1	7.14286	Accessory
adcC	1	7.14286	Accessory
add	1	7.14286	Accessory
addA	1	7.14286	Accessory
adhE	1	7.14286	Accessory
adhP	9	64.2857	Accessory
adk	12	85.7143	Accessory
aes	1	7.14286	Accessory
afuA	0	0	Accessory
afuC	0	0	Accessory
aga	1	7.14286	Accessory
agaB	12	85.7143	Accessory
agaS	12	85.7143	Accessory
agrC	0	0	Accessory
aguA	0	0	Accessory
aguB	11	78.5714	Accessory
ahpC	0	0	Accessory
ahpF	1	7.14286	Accessory
alaS	1	7.14286	Accessory
albA	0	0	Accessory
albE~~~pqqL	12	85.7143	Accessory
albF	0	0	Accessory
albF~~~pqqL	12	85.7143	Accessory
ald	0	0	Accessory
aliA	12	85.7143	Accessory
aliA~~~sarA~~~oppA	13	92.8571	Accessory
alkD	1	7.14286	Accessory
alpA	3	21.4286	Accessory
alr	11	78.5714	Accessory
alr~~~acpS	13	92.8571	Accessory
alsS	1	7.14286	Accessory
alsT	1	7.14286	Accessory
alwI	0	0	Accessory
amaP	0	0	Accessory
amiA	0	0	Accessory
amiF~~~oppF	13	92.8571	Accessory
ampC	0	0	Accessory
ampH	0	0	Accessory
ampH~~~ampC	12	85.7143	Accessory
ampS~~~pepS	12	85.7143	Accessory
amrA	0	0	Accessory
amsE	12	85.7143	Accessory
amt	0	0	Accessory
amtB	1	7.14286	Accessory
amyA	12	85.7143	Accessory
ansA	1	7.14286	Accessory
ansP	12	85.7143	Accessory
ant6	12	85.7143	Accessory
apbE	0	0	Accessory
apeA	0	0	Accessory
aph3IIIa	0	0	Accessory
aprE	2	14.2857	Accessory
apt	13	92.8571	Accessory
araC	0	0	Accessory
araC~~~tetD	1	7.14286	Accessory
araD	6	42.8571	Accessory
araJ	1	7.14286	Accessory
araQ	0	0	Accessory
araQ~~~ugpE	12	85.7143	Accessory
arcA	6	42.8571	Accessory
arcC	6	42.8571	Accessory
arcR	0	0	Accessory
arcT	1	7.14286	Accessory
ardA	0	0	Accessory
argA~~~ywnH	12	85.7143	Accessory
argB	1	7.14286	Accessory
argC	1	7.14286	Accessory
argD	1	7.14286	Accessory
argE	12	85.7143	Accessory
argF	6	42.8571	Accessory
argG	0	0	Accessory
argH	0	0	Accessory
argJ	1	7.14286	Accessory
argR	6	42.8571	Accessory
argS	12	85.7143	Accessory
arlR	0	0	Accessory
arlR~~~csrR~~~ompR	13	92.8571	Accessory
aroA	0	0	Accessory
aroB	1	7.14286	Accessory
aroB~~~aroE	12	85.7143	Accessory
aroC	12	85.7143	Accessory
aroD	12	85.7143	Accessory
aroE	0	0	Accessory
aroG1	13	92.8571	Accessory
aroK	12	85.7143	Accessory
arpU	0	0	Accessory
arsC	0	0	Accessory
arsC~~~adaB	12	85.7143	Accessory
arsR	1	7.14286	Accessory
artM	0	0	Accessory
asbA	0	0	Accessory
ascB	1	7.14286	Accessory
asd	12	85.7143	Accessory
asnA	0	0	Accessory
asnS	12	85.7143	Accessory
asp1	0	0	Accessory
asp2	0	0	Accessory
asp3	1	7.14286	Accessory
asp4	0	0	Accessory
asp5	0	0	Accessory
aspB	14	100	Core
aspB~~~alaT	0	0	Accessory
aspS	1	7.14286	Accessory
atoS	0	0	Accessory
atpA	13	92.8571	Accessory
atpB	13	92.8571	Accessory
atpC	13	92.8571	Accessory
atpD	13	92.8571	Accessory
atpE	1	7.14286	Accessory
atpF	13	92.8571	Accessory
atpG	13	92.8571	Accessory
atpH	1	7.14286	Accessory
avrD	0	0	Accessory
axe1	12	85.7143	Accessory
azlC	13	92.8571	Accessory
azlC~~~ygaZ	0	0	Accessory
azlD	13	92.8571	Accessory
azlD2	1	7.14286	Accessory
baeS	0	0	Accessory
bcc	1	7.14286	Accessory
bceA	1	7.14286	Accessory
bceB	0	0	Accessory
bceB~~~yxdM	12	85.7143	Accessory
bcrC	0	0	Accessory
bcsA	1	7.14286	Accessory
bcsZ	1	7.14286	Accessory
beeE	0	0	Accessory
bepR	1	7.14286	Accessory
bet	0	0	Accessory
betI~~~tetR	0	0	Accessory
bglB	0	0	Accessory
bglB~~~gmuD~~~bglA	12	85.7143	Accessory
bglG	0	0	Accessory
bglG~~~licT	0	0	Accessory
bglH	0	0	Accessory
bgrS	0	0	Accessory
bhtF	0	0	Accessory
bigG	0	0	Accessory
bioF	0	0	Accessory
bioH	0	0	Accessory
bioY	0	0	Accessory
birA	0	0	Accessory
blaR1	0	0	Accessory
blpA	1	7.14286	Accessory
blpC	1	7.14286	Accessory
blpI	0	0	Accessory
blpJ	1	7.14286	Accessory
blpL	6	42.8571	Accessory
blpM	0	0	Accessory
blpO	0	0	Accessory
blpP	0	0	Accessory
blpR	0	0	Accessory
blpS~~~lytR~~~lytT	6	42.8571	Accessory
blpT	0	0	Accessory
blpX	0	0	Accessory
blpY	5	35.7143	Accessory
blpZ	2	14.2857	Accessory
bofA	0	0	Accessory
briC	0	0	Accessory
brkB	1	7.14286	Accessory
brkB~~~yihY	0	0	Accessory
brnQ	12	85.7143	Accessory
brpA	1	7.14286	Accessory
btuD	12	85.7143	Accessory
btuE	0	0	Accessory
budA	0	0	Accessory
cDA1	1	7.14286	Accessory
cadA	0	0	Accessory
cadD	12	85.7143	Accessory
cadX	2	14.2857	Accessory
caiA	1	7.14286	Accessory
caiD~~~fabM	12	85.7143	Accessory
capA	0	0	Accessory
capD	0	0	Accessory
carA	12	85.7143	Accessory
carB	0	0	Accessory
cas1	0	0	Accessory
cas10	0	0	Accessory
cas1c	0	0	Accessory
cas2	0	0	Accessory
cas3	0	0	Accessory
cas4	0	0	Accessory
cas5c	0	0	Accessory
cas6	0	0	Accessory
cas7c	0	0	Accessory
cas8c	0	0	Accessory
cas9	1	7.14286	Accessory
catE	5	35.7143	Accessory
cbbX	0	0	Accessory
cbiA	0	0	Accessory
cbiB	0	0	Accessory
cbiC	0	0	Accessory
cbiD	0	0	Accessory
cbiE	0	0	Accessory
cbiF	0	0	Accessory
cbiG	0	0	Accessory
cbiM	0	0	Accessory
cbiN	0	0	Accessory
cbiO	1	7.14286	Accessory
cbiQ	0	0	Accessory
cbiT	0	0	Accessory
cbpB	12	85.7143	Accessory
cbpC	0	0	Accessory
cbpD	0	0	Accessory
cbpD2	0	0	Accessory
cbpE	0	0	Accessory
cbpF~~~cbpJ	12	85.7143	Accessory
cbpI	0	0	Accessory
cbrC	0	0	Accessory
cca	0	0	Accessory
ccc1	12	85.7143	Accessory
ccdA	1	7.14286	Accessory
ccdA2	1	7.14286	Accessory
ccdA2~~~ccdA	12	85.7143	Accessory
ccmA	0	0	Accessory
ccmD	0	0	Accessory
ccmE	1	7.14286	Accessory
ccmK	0	0	Accessory
ccoS	3	21.4286	Accessory
ccpA	1	7.14286	Accessory
ccpA~~~lacI	12	85.7143	Accessory
ccpN	0	0	Accessory
ccrZ	12	85.7143	Accessory
cdaA	0	0	Accessory
cdaR~~~ybbR	12	85.7143	Accessory
cdd	12	85.7143	Accessory
cdiI	0	0	Accessory
cdsA	13	92.8571	Accessory
celA	0	0	Accessory
celA~~~comEA	12	85.7143	Accessory
celB	0	0	Accessory
celB~~~comEC	12	85.7143	Accessory
celC	0	0	Accessory
celC~~~bigG	0	0	Accessory
ceuA	1	7.14286	Accessory
ceuB	1	7.14286	Accessory
ceuC	1	7.14286	Accessory
ceuD	1	7.14286	Accessory
chaP	0	0	Accessory
ciaH~~~baeS	12	85.7143	Accessory
ciaR	0	0	Accessory
cibA	5	35.7143	Accessory
cibB	5	35.7143	Accessory
cinA	12	85.7143	Accessory
citA	0	0	Accessory
citB	1	7.14286	Accessory
citB~~~luxR~~~degU	13	92.8571	Accessory
citC	1	7.14286	Accessory
citD	1	7.14286	Accessory
citE	1	7.14286	Accessory
citF	1	7.14286	Accessory
citG	1	7.14286	Accessory
citM	1	7.14286	Accessory
citS	0	0	Accessory
citS~~~yesM	6	42.8571	Accessory
citX	1	7.14286	Accessory
citZ	1	7.14286	Accessory
clcA	12	85.7143	Accessory
clcB	0	0	Accessory
clpA	1	7.14286	Accessory
clpA~~~clpC	13	92.8571	Accessory
clpA~~~clpE	12	85.7143	Accessory
clpB	1	7.14286	Accessory
clpC	0	0	Accessory
clpC1	0	0	Accessory
clpE	1	7.14286	Accessory
clpL	0	0	Accessory
clpL~~~clpA	13	92.8571	Accessory
clpP	12	85.7143	Accessory
clpX	0	0	Accessory
cls	11	78.5714	Accessory
cmk	13	92.8571	Accessory
cmr4	0	0	Accessory
coaA	12	85.7143	Accessory
coaB	0	0	Accessory
coaC	12	85.7143	Accessory
coaD	0	0	Accessory
coaE	0	0	Accessory
cobA	0	0	Accessory
cobB	0	0	Accessory
cobD	0	0	Accessory
cobI	0	0	Accessory
cobJ	0	0	Accessory
cobK	0	0	Accessory
cobN	0	0	Accessory
cobQ	0	0	Accessory
cobQ~~~gatD	13	92.8571	Accessory
cobS	0	0	Accessory
cobT	0	0	Accessory
cobU	0	0	Accessory
codY	0	0	Accessory
cof	0	0	Accessory
cofD	0	0	Accessory
cof~~~ybjI	12	85.7143	Accessory
coiA	0	0	Accessory
coiA~~~prsA	12	85.7143	Accessory
comA	0	0	Accessory
comA~~~pncF	10	71.4286	Accessory
comB	0	0	Accessory
comC	0	0	Accessory
comD	1	7.14286	Accessory
comD~~~natK	0	0	Accessory
comD~~~yesM~~~dcuS	12	85.7143	Accessory
comE	0	0	Accessory
comEA	1	7.14286	Accessory
comEB	1	7.14286	Accessory
comEC	1	7.14286	Accessory
comE~~~comEB	12	85.7143	Accessory
comF	0	0	Accessory
comFA	1	7.14286	Accessory
comFA~~~comF	0	0	Accessory
comFC	0	0	Accessory
comF~~~comFC	6	42.8571	Accessory
comF~~~recG~~~comFA	12	85.7143	Accessory
comGA	0	0	Accessory
comGA~~~comGB	12	85.7143	Accessory
comGB	0	0	Accessory
comGC	12	85.7143	Accessory
comGD	12	85.7143	Accessory
comGE	1	7.14286	Accessory
comGF	0	0	Accessory
comGF~~~comGG	12	85.7143	Accessory
comGG	0	0	Accessory
comM	0	0	Accessory
comP	1	7.14286	Accessory
comR	0	0	Accessory
comR1	1	7.14286	Accessory
comW	0	0	Accessory
comX	0	0	Accessory
comX1	0	0	Accessory
comX1~~~comX	0	0	Accessory
comX2	0	0	Accessory
comX2~~~comX1	0	0	Accessory
copG	0	0	Accessory
copY	3	21.4286	Accessory
copZ	1	7.14286	Accessory
corA	12	85.7143	Accessory
cotH	0	0	Accessory
cotS	0	0	Accessory
cotS~~~licA	12	85.7143	Accessory
cpdA	1	7.14286	Accessory
cpdB	0	0	Accessory
cpoA	12	85.7143	Accessory
cppA	0	0	Accessory
cps2a	0	0	Accessory
cps4B	0	0	Accessory
cpsC	11	78.5714	Accessory
cpsD	0	0	Accessory
cpsD~~~mrp	11	78.5714	Accessory
cpsE~~~wcaJ~~~epsL	6	42.8571	Accessory
cpsI	0	0	Accessory
cpsJ	0	0	Accessory
cpsL	0	0	Accessory
cpsO~~~epsJ	1	7.14286	Accessory
crcB	1	7.14286	Accessory
crcB~~~fluC	12	85.7143	Accessory
crp	1	7.14286	Accessory
csbD	7	50	Accessory
cshA	0	0	Accessory
cshA~~~srmB	12	85.7143	Accessory
cshA~~~srmB~~~yfmL	12	85.7143	Accessory
cshB	0	0	Accessory
cshB~~~srmB	12	85.7143	Accessory
csm2	0	0	Accessory
csm3	0	0	Accessory
csm4	0	0	Accessory
csm5	0	0	Accessory
csm6	0	0	Accessory
csn2	0	0	Accessory
csoR	1	7.14286	Accessory
ctpA	0	0	Accessory
ctsR	13	92.8571	Accessory
cutC	0	0	Accessory
cutD	0	0	Accessory
cvfB	0	0	Accessory
cvpA	0	0	Accessory
cwlA	1	7.14286	Accessory
cwlO	12	85.7143	Accessory
cydC	0	0	Accessory
cydD	0	0	Accessory
cylB	0	0	Accessory
cynT	3	21.4286	Accessory
cynX	12	85.7143	Accessory
cysA	5	35.7143	Accessory
cysB	0	0	Accessory
cysE	1	7.14286	Accessory
cysE~~~epsC~~~rimI	12	85.7143	Accessory
cysK	12	85.7143	Accessory
cysS	12	85.7143	Accessory
czcD	12	85.7143	Accessory
dAP2	1	7.14286	Accessory
dLH	1	7.14286	Accessory
dacC	1	7.14286	Accessory
dadA	12	85.7143	Accessory
dam	1	7.14286	Accessory
dapA	12	85.7143	Accessory
dapB	0	0	Accessory
dapD	14	100	Core
darT	0	0	Accessory
dcm	0	0	Accessory
ddl	12	85.7143	Accessory
dedA	1	7.14286	Accessory
def	12	85.7143	Accessory
degA	0	0	Accessory
degP	0	0	Accessory
degV	0	0	Accessory
degV~~~trmH	0	0	Accessory
deoB	12	85.7143	Accessory
deoC	12	85.7143	Accessory
deoD	12	85.7143	Accessory
deoR	11	78.5714	Accessory
deoR~~~glpR	12	85.7143	Accessory
deoR~~~ulaR~~~glpR	0	0	Accessory
der	0	0	Accessory
dexB	12	85.7143	Accessory
dgkA	12	85.7143	Accessory
dhaK	0	0	Accessory
dhaK~~~dhaQ	0	0	Accessory
dhaL	0	0	Accessory
dhaM	0	0	Accessory
dhaQ	1	7.14286	Accessory
dhaS	1	7.14286	Accessory
dhfR	12	85.7143	Accessory
dicA	0	0	Accessory
dinB	12	85.7143	Accessory
dinD	1	7.14286	Accessory
dinF	0	0	Accessory
dinG	0	0	Accessory
divIB	0	0	Accessory
divIVA	12	85.7143	Accessory
dltA	0	0	Accessory
dltB	4	28.5714	Accessory
dltC	0	0	Accessory
dltD	4	28.5714	Accessory
dltR	0	0	Accessory
dnaA	0	0	Accessory
dnaB	1	7.14286	Accessory
dnaB~~~dnaD	12	85.7143	Accessory
dnaC	0	0	Accessory
dnaD	13	92.8571	Accessory
dnaE	1	7.14286	Accessory
dnaG	12	85.7143	Accessory
dnaI	1	7.14286	Accessory
dnaJ	0	0	Accessory
dnaK	13	92.8571	Accessory
dnaN	0	0	Accessory
dnaQ	1	7.14286	Accessory
dnaQ~~~dinG~~~polC	12	85.7143	Accessory
dnaQ~~~polC	0	0	Accessory
dnaX	0	0	Accessory
doc	2	14.2857	Accessory
dpiB	0	0	Accessory
dpnA	4	28.5714	Accessory
dpnD	0	0	Accessory
dpnI	12	85.7143	Accessory
dpnM	4	28.5714	Accessory
dppB	0	0	Accessory
dppC	1	7.14286	Accessory
dppD	0	0	Accessory
dprA	12	85.7143	Accessory
dps	12	85.7143	Accessory
draG	0	0	Accessory
drrA	1	7.14286	Accessory
drrB	1	7.14286	Accessory
dsbD	1	7.14286	Accessory
dtd	13	92.8571	Accessory
dusB	13	92.8571	Accessory
dut	13	92.8571	Accessory
eCFS	0	0	Accessory
eMAP	12	85.7143	Accessory
eRG12	1	7.14286	Accessory
eamA	0	0	Accessory
eamA~~~rhaT	12	85.7143	Accessory
eamA~~~yicL	12	85.7143	Accessory
ebgC	12	85.7143	Accessory
ebhA	0	0	Accessory
ebsA	1	7.14286	Accessory
ebsC	12	85.7143	Accessory
ecfA1	0	0	Accessory
ecfA2	0	0	Accessory
ecfT	0	0	Accessory
ecfT~~~mtsC~~~cbiQ	0	0	Accessory
ecsA~~~ccmA	12	85.7143	Accessory
ecsB	0	0	Accessory
ecsC	0	0	Accessory
eda	0	0	Accessory
efeB	6	42.8571	Accessory
efeO	6	42.8571	Accessory
efeU	6	42.8571	Accessory
efiE	1	7.14286	Accessory
efp	13	92.8571	Accessory
egtUA	12	85.7143	Accessory
egtUBC	12	85.7143	Accessory
ehuA	12	85.7143	Accessory
elaA	0	0	Accessory
elaC	1	7.14286	Accessory
elsH	1	7.14286	Accessory
elyC	1	7.14286	Accessory
endA	13	92.8571	Accessory
engA	0	0	Accessory
eno	1	7.14286	Accessory
entS	6	42.8571	Accessory
epsA	1	7.14286	Accessory
epsB	0	0	Accessory
epsE	0	0	Accessory
epsF	0	0	Accessory
epsG	0	0	Accessory
epsH	0	0	Accessory
epsJ	0	0	Accessory
epsJ~~~wcaA	4	28.5714	Accessory
epsL	5	35.7143	Accessory
epsN	0	0	Accessory
epsV	0	0	Accessory
epuA	1	7.14286	Accessory
era	12	85.7143	Accessory
eriC	1	7.14286	Accessory
ermB	0	0	Accessory
ermL~~~ermC	0	0	Accessory
esaA	0	0	Accessory
esaC	0	0	Accessory
escB	0	0	Accessory
essA	0	0	Accessory
essB	0	0	Accessory
essC	0	0	Accessory
essC~~~ftsK	0	0	Accessory
esxA	0	0	Accessory
eutA	0	0	Accessory
eutC	0	0	Accessory
eutD	0	0	Accessory
eutH	0	0	Accessory
eutJ	0	0	Accessory
eutL	0	0	Accessory
eutM	0	0	Accessory
eutN	0	0	Accessory
eutP	0	0	Accessory
eutQ	0	0	Accessory
exoY~~~wcaJ	12	85.7143	Accessory
exp7~~~mgtA	12	85.7143	Accessory
exp8	12	85.7143	Accessory
ezrA	12	85.7143	Accessory
fAU1	12	85.7143	Accessory
fIDO	0	0	Accessory
fMR2	0	0	Accessory
fabD	0	0	Accessory
fabF	12	85.7143	Accessory
fabG	13	92.8571	Accessory
fabH	12	85.7143	Accessory
fabK	12	85.7143	Accessory
fabM	1	7.14286	Accessory
fabZ	12	85.7143	Accessory
fabZ~~~fatA	12	85.7143	Accessory
fabZ~~~paaI	12	85.7143	Accessory
fabZ~~~spxR	1	7.14286	Accessory
fadH2	1	7.14286	Accessory
fadM	1	7.14286	Accessory
fasA	0	0	Accessory
fatA	1	7.14286	Accessory
fba	13	92.8571	Accessory
fbp	0	0	Accessory
fbpA	0	0	Accessory
fbpB	0	0	Accessory
fctA	6	42.8571	Accessory
femA	1	7.14286	Accessory
femA~~~murN	0	0	Accessory
femB~~~fmhB	0	0	Accessory
feoA	0	0	Accessory
feoB	1	7.14286	Accessory
fer	0	0	Accessory
ffh	12	85.7143	Accessory
fghA	1	7.14286	Accessory
fhs	1	7.14286	Accessory
fhs1	0	0	Accessory
fhs~~~fhs2	12	85.7143	Accessory
fibA	0	0	Accessory
fieF	0	0	Accessory
fieF~~~mntE	12	85.7143	Accessory
fimA	0	0	Accessory
fimB	0	0	Accessory
fimC	0	0	Accessory
flaA1	12	85.7143	Accessory
fldA	12	85.7143	Accessory
flgJ	0	0	Accessory
flgM	0	0	Accessory
fliA	1	7.14286	Accessory
fliJ	0	0	Accessory
fliK	0	0	Accessory
fliS	0	0	Accessory
fmhB	10	71.4286	Accessory
fmnP	12	85.7143	Accessory
fmt	12	85.7143	Accessory
fmtA	0	0	Accessory
fni	0	0	Accessory
focA	13	92.8571	Accessory
folA	1	7.14286	Accessory
folB	1	7.14286	Accessory
folC	12	85.7143	Accessory
folD	12	85.7143	Accessory
folE	0	0	Accessory
folK	0	0	Accessory
folK~~~folB	12	85.7143	Accessory
folP	0	0	Accessory
folT	1	7.14286	Accessory
frmA	1	7.14286	Accessory
frmB	13	92.8571	Accessory
frr	0	0	Accessory
fruA	1	7.14286	Accessory
fruA~~~luxR	11	78.5714	Accessory
frvX	12	85.7143	Accessory
fsa	0	0	Accessory
fszA	0	0	Accessory
ftcD	0	0	Accessory
ftf	1	7.14286	Accessory
ftsA	12	85.7143	Accessory
ftsB	0	0	Accessory
ftsE	0	0	Accessory
ftsH	0	0	Accessory
ftsJ	0	0	Accessory
ftsK	0	0	Accessory
ftsL	0	0	Accessory
ftsQ	1	7.14286	Accessory
ftsW	12	85.7143	Accessory
ftsX	1	7.14286	Accessory
ftsY	12	85.7143	Accessory
ftsZ	0	0	Accessory
ftsZ~~~murF	1	7.14286	Accessory
fucI	0	0	Accessory
fucO	0	0	Accessory
fucO~~~gldA	5	35.7143	Accessory
funZ	1	7.14286	Accessory
fur	1	7.14286	Accessory
fusA	1	7.14286	Accessory
galA	0	0	Accessory
galE	0	0	Accessory
galK	0	0	Accessory
galM	12	85.7143	Accessory
galR	1	7.14286	Accessory
galT	0	0	Accessory
galT2~~~galT	12	85.7143	Accessory
galU	14	100	Core
ganA	12	85.7143	Accessory
gap	1	7.14286	Accessory
gapN	1	7.14286	Accessory
gatA	0	0	Accessory
gatB	0	0	Accessory
gatC	0	0	Accessory
gbpC	1	7.14286	Accessory
gdhA	12	85.7143	Accessory
gdmH	1	7.14286	Accessory
gdpP	12	85.7143	Accessory
gldA	0	0	Accessory
glf	3	21.4286	Accessory
glgA	13	92.8571	Accessory
glgB	13	92.8571	Accessory
glgC	13	92.8571	Accessory
glgD	13	92.8571	Accessory
glgP	1	7.14286	Accessory
glmM	0	0	Accessory
glmS	13	92.8571	Accessory
glmU	13	92.8571	Accessory
glnA	0	0	Accessory
glnH	9	64.2857	Accessory
glnK	0	0	Accessory
glnQ	9	64.2857	Accessory
glnQ~~~artM	13	92.8571	Accessory
glnQ~~~yxeN	0	0	Accessory
glnR	0	0	Accessory
glnR~~~merR	12	85.7143	Accessory
gloA	0	0	Accessory
gloB	12	85.7143	Accessory
gloB~~~yqgX	0	0	Accessory
glpE	1	7.14286	Accessory
glpE~~~moeZ~~~pspE	12	85.7143	Accessory
glpF	12	85.7143	Accessory
glpG	12	85.7143	Accessory
glpK	6	42.8571	Accessory
glpO	6	42.8571	Accessory
glpR	0	0	Accessory
gltA	0	0	Accessory
gltB	1	7.14286	Accessory
gltC	4	28.5714	Accessory
gltD	1	7.14286	Accessory
gltX	13	92.8571	Accessory
gluP	0	0	Accessory
glvR	0	0	Accessory
glxK	1	7.14286	Accessory
gly	0	0	Accessory
glyA	12	85.7143	Accessory
glyE	0	0	Accessory
glyG	0	0	Accessory
glyP~~~alsT	6	42.8571	Accessory
glyQ	12	85.7143	Accessory
glyS	1	7.14286	Accessory
gmk	12	85.7143	Accessory
gmuD	0	0	Accessory
gndA	13	92.8571	Accessory
gntR	1	7.14286	Accessory
gntR~~~aRO8	0	0	Accessory
gntR~~~ubiC	12	85.7143	Accessory
gntR~~~ytrA~~~yhcF	12	85.7143	Accessory
gntR~~~yvoA~~~mngR	12	85.7143	Accessory
gntX	0	0	Accessory
gor	12	85.7143	Accessory
gorA	0	0	Accessory
gph	12	85.7143	Accessory
gpmA	12	85.7143	Accessory
gpmB2	0	0	Accessory
gpsA	14	100	Core
gpsB	12	85.7143	Accessory
greA	12	85.7143	Accessory
groES	12	85.7143	Accessory
groL	12	85.7143	Accessory
group_0	1	7.14286	Accessory
group_1	2	14.2857	Accessory
group_10	0	0	Accessory
group_100	0	0	Accessory
group_1000	0	0	Accessory
group_10000	0	0	Accessory
group_10001	0	0	Accessory
group_10002	0	0	Accessory
group_10003	0	0	Accessory
group_10004	0	0	Accessory
group_10005	0	0	Accessory
group_10006	1	7.14286	Accessory
group_10007	0	0	Accessory
group_10008	0	0	Accessory
group_10009	0	0	Accessory
group_1001	1	7.14286	Accessory
group_10010	0	0	Accessory
group_10011	1	7.14286	Accessory
group_10012	0	0	Accessory
group_10013	0	0	Accessory
group_10014	0	0	Accessory
group_10015	1	7.14286	Accessory
group_10016	0	0	Accessory
group_10017	0	0	Accessory
group_10018	0	0	Accessory
group_10019	0	0	Accessory
group_1002	0	0	Accessory
group_10020	0	0	Accessory
group_10021	0	0	Accessory
group_10022	1	7.14286	Accessory
group_10023	1	7.14286	Accessory
group_10024	1	7.14286	Accessory
group_10025	1	7.14286	Accessory
group_10026	1	7.14286	Accessory
group_10027	0	0	Accessory
group_10028	0	0	Accessory
group_10029	0	0	Accessory
group_1003	0	0	Accessory
group_10030	0	0	Accessory
group_10031	0	0	Accessory
group_10032	0	0	Accessory
group_10033	0	0	Accessory
group_10034	0	0	Accessory
group_10035	0	0	Accessory
group_10036	0	0	Accessory
group_10037	0	0	Accessory
group_10038	0	0	Accessory
group_10039	7	50	Accessory
group_1004	1	7.14286	Accessory
group_10040	0	0	Accessory
group_10041	0	0	Accessory
group_10042	1	7.14286	Accessory
group_10043	1	7.14286	Accessory
group_10044	0	0	Accessory
group_10045	0	0	Accessory
group_10046	0	0	Accessory
group_10047	1	7.14286	Accessory
group_10048	0	0	Accessory
group_10049	0	0	Accessory
group_1005	0	0	Accessory
group_10050	0	0	Accessory
group_10051	0	0	Accessory
group_10052	0	0	Accessory
group_10053	0	0	Accessory
group_10054	1	7.14286	Accessory
group_10055	1	7.14286	Accessory
group_10056	1	7.14286	Accessory
group_10057	1	7.14286	Accessory
group_10058	0	0	Accessory
group_10059	0	0	Accessory
group_1006	1	7.14286	Accessory
group_10060	0	0	Accessory
group_10061	0	0	Accessory
group_10062	1	7.14286	Accessory
group_10063	0	0	Accessory
group_10064	0	0	Accessory
group_10065	0	0	Accessory
group_10066	0	0	Accessory
group_10067	0	0	Accessory
group_10068	0	0	Accessory
group_10069	0	0	Accessory
group_1007	0	0	Accessory
group_10070	0	0	Accessory
group_10071	0	0	Accessory
group_10072	0	0	Accessory
group_10073	0	0	Accessory
group_10074	0	0	Accessory
group_10075	0	0	Accessory
group_10076	0	0	Accessory
group_10077	0	0	Accessory
group_10078	0	0	Accessory
group_10079	0	0	Accessory
group_1008	0	0	Accessory
group_10080	0	0	Accessory
group_10081	0	0	Accessory
group_10082	1	7.14286	Accessory
group_10083	0	0	Accessory
group_10084	1	7.14286	Accessory
group_10085	1	7.14286	Accessory
group_10086	1	7.14286	Accessory
group_10087	1	7.14286	Accessory
group_10088	1	7.14286	Accessory
group_10089	0	0	Accessory
group_1009	0	0	Accessory
group_10090	0	0	Accessory
group_10091	0	0	Accessory
group_10092	1	7.14286	Accessory
group_10093	1	7.14286	Accessory
group_10094	1	7.14286	Accessory
group_10095	1	7.14286	Accessory
group_10096	1	7.14286	Accessory
group_10097	1	7.14286	Accessory
group_10098	0	0	Accessory
group_10099	0	0	Accessory
group_101	0	0	Accessory
group_1010	0	0	Accessory
group_10100	0	0	Accessory
group_10101	0	0	Accessory
group_10102	0	0	Accessory
group_10103	0	0	Accessory
group_10104	0	0	Accessory
group_10105	0	0	Accessory
group_10106	0	0	Accessory
group_10107	0	0	Accessory
group_10108	1	7.14286	Accessory
group_10109	0	0	Accessory
group_1011	1	7.14286	Accessory
group_10110	0	0	Accessory
group_10111	0	0	Accessory
group_10112	0	0	Accessory
group_10113	1	7.14286	Accessory
group_10114	1	7.14286	Accessory
group_10115	0	0	Accessory
group_10116	0	0	Accessory
group_10117	0	0	Accessory
group_10118	0	0	Accessory
group_10119	1	7.14286	Accessory
group_1012	0	0	Accessory
group_10120	1	7.14286	Accessory
group_10121	1	7.14286	Accessory
group_10122	1	7.14286	Accessory
group_10123	0	0	Accessory
group_10124	1	7.14286	Accessory
group_10125	1	7.14286	Accessory
group_10126	1	7.14286	Accessory
group_10127	0	0	Accessory
group_10128	0	0	Accessory
group_10129	0	0	Accessory
group_1013	0	0	Accessory
group_10130	0	0	Accessory
group_10131	0	0	Accessory
group_10132	0	0	Accessory
group_10133	0	0	Accessory
group_10134	1	7.14286	Accessory
group_10135	0	0	Accessory
group_10136	0	0	Accessory
group_10137	0	0	Accessory
group_10138	0	0	Accessory
group_10139	0	0	Accessory
group_1014	0	0	Accessory
group_10140	0	0	Accessory
group_10141	0	0	Accessory
group_10142	0	0	Accessory
group_10143	0	0	Accessory
group_10144	0	0	Accessory
group_10145	0	0	Accessory
group_10146	0	0	Accessory
group_10147	0	0	Accessory
group_10148	0	0	Accessory
group_10149	0	0	Accessory
group_1015	0	0	Accessory
group_10150	1	7.14286	Accessory
group_10151	1	7.14286	Accessory
group_10152	1	7.14286	Accessory
group_10153	1	7.14286	Accessory
group_10154	0	0	Accessory
group_10155	0	0	Accessory
group_10156	0	0	Accessory
group_10157	0	0	Accessory
group_10158	0	0	Accessory
group_10159	1	7.14286	Accessory
group_1016	0	0	Accessory
group_10160	1	7.14286	Accessory
group_10161	1	7.14286	Accessory
group_10162	1	7.14286	Accessory
group_10163	1	7.14286	Accessory
group_10164	0	0	Accessory
group_10165	0	0	Accessory
group_10166	0	0	Accessory
group_10167	0	0	Accessory
group_10168	0	0	Accessory
group_10169	0	0	Accessory
group_1017	4	28.5714	Accessory
group_10170	0	0	Accessory
group_10171	1	7.14286	Accessory
group_10172	0	0	Accessory
group_10173	0	0	Accessory
group_10174	0	0	Accessory
group_10175	0	0	Accessory
group_10176	0	0	Accessory
group_10177	0	0	Accessory
group_10178	0	0	Accessory
group_10179	0	0	Accessory
group_1018	0	0	Accessory
group_10180	0	0	Accessory
group_10181	0	0	Accessory
group_10182	0	0	Accessory
group_10183	1	7.14286	Accessory
group_10184	0	0	Accessory
group_10185	0	0	Accessory
group_10186	1	7.14286	Accessory
group_10187	0	0	Accessory
group_10188	0	0	Accessory
group_10189	1	7.14286	Accessory
group_1019	0	0	Accessory
group_10190	1	7.14286	Accessory
group_10191	1	7.14286	Accessory
group_10192	0	0	Accessory
group_10193	0	0	Accessory
group_10194	0	0	Accessory
group_10195	0	0	Accessory
group_10196	0	0	Accessory
group_10197	0	0	Accessory
group_10198	0	0	Accessory
group_10199	0	0	Accessory
group_102	0	0	Accessory
group_1020	0	0	Accessory
group_10200	0	0	Accessory
group_10201	0	0	Accessory
group_10202	0	0	Accessory
group_10203	0	0	Accessory
group_10204	0	0	Accessory
group_10205	0	0	Accessory
group_10206	0	0	Accessory
group_10207	0	0	Accessory
group_10208	0	0	Accessory
group_10209	1	7.14286	Accessory
group_1021	0	0	Accessory
group_10210	0	0	Accessory
group_10211	0	0	Accessory
group_10212	1	7.14286	Accessory
group_10213	0	0	Accessory
group_10214	0	0	Accessory
group_10215	0	0	Accessory
group_10216	0	0	Accessory
group_10217	0	0	Accessory
group_10218	0	0	Accessory
group_10219	0	0	Accessory
group_1022	12	85.7143	Accessory
group_10220	0	0	Accessory
group_10221	1	7.14286	Accessory
group_10222	1	7.14286	Accessory
group_10223	1	7.14286	Accessory
group_10224	1	7.14286	Accessory
group_10225	1	7.14286	Accessory
group_10226	1	7.14286	Accessory
group_10227	1	7.14286	Accessory
group_10228	0	0	Accessory
group_10229	0	0	Accessory
group_1023	0	0	Accessory
group_10230	0	0	Accessory
group_10231	0	0	Accessory
group_10232	0	0	Accessory
group_10233	1	7.14286	Accessory
group_10234	1	7.14286	Accessory
group_10235	0	0	Accessory
group_10236	0	0	Accessory
group_10237	0	0	Accessory
group_10238	0	0	Accessory
group_10239	0	0	Accessory
group_1024	0	0	Accessory
group_10240	0	0	Accessory
group_10241	0	0	Accessory
group_10242	0	0	Accessory
group_10243	1	7.14286	Accessory
group_10244	0	0	Accessory
group_10245	0	0	Accessory
group_10246	1	7.14286	Accessory
group_10247	0	0	Accessory
group_10248	0	0	Accessory
group_10249	0	0	Accessory
group_1025	0	0	Accessory
group_10250	0	0	Accessory
group_10251	0	0	Accessory
group_10252	1	7.14286	Accessory
group_10253	0	0	Accessory
group_10254	0	0	Accessory
group_10255	0	0	Accessory
group_10256	0	0	Accessory
group_10257	0	0	Accessory
group_10258	0	0	Accessory
group_10259	0	0	Accessory
group_1026	0	0	Accessory
group_10260	0	0	Accessory
group_10261	1	7.14286	Accessory
group_10262	1	7.14286	Accessory
group_10263	1	7.14286	Accessory
group_10264	1	7.14286	Accessory
group_10265	1	7.14286	Accessory
group_10266	1	7.14286	Accessory
group_10267	1	7.14286	Accessory
group_10268	1	7.14286	Accessory
group_10269	1	7.14286	Accessory
group_1027	0	0	Accessory
group_10270	1	7.14286	Accessory
group_10271	0	0	Accessory
group_10272	0	0	Accessory
group_10273	0	0	Accessory
group_10274	1	7.14286	Accessory
group_10275	1	7.14286	Accessory
group_10276	0	0	Accessory
group_10277	0	0	Accessory
group_10278	0	0	Accessory
group_10279	0	0	Accessory
group_1028	0	0	Accessory
group_10280	0	0	Accessory
group_10281	0	0	Accessory
group_10282	0	0	Accessory
group_10283	0	0	Accessory
group_10284	0	0	Accessory
group_10285	0	0	Accessory
group_10286	0	0	Accessory
group_10287	2	14.2857	Accessory
group_10288	0	0	Accessory
group_10289	0	0	Accessory
group_1029	0	0	Accessory
group_10290	0	0	Accessory
group_10291	0	0	Accessory
group_10292	1	7.14286	Accessory
group_10293	1	7.14286	Accessory
group_10294	1	7.14286	Accessory
group_10295	1	7.14286	Accessory
group_10296	1	7.14286	Accessory
group_10297	1	7.14286	Accessory
group_10298	0	0	Accessory
group_10299	1	7.14286	Accessory
group_103	6	42.8571	Accessory
group_1030	0	0	Accessory
group_10300	1	7.14286	Accessory
group_10301	1	7.14286	Accessory
group_10302	1	7.14286	Accessory
group_10303	1	7.14286	Accessory
group_10304	1	7.14286	Accessory
group_10305	1	7.14286	Accessory
group_10306	0	0	Accessory
group_10307	0	0	Accessory
group_10308	0	0	Accessory
group_10309	1	7.14286	Accessory
group_1031	0	0	Accessory
group_10310	1	7.14286	Accessory
group_10311	1	7.14286	Accessory
group_10312	0	0	Accessory
group_10313	0	0	Accessory
group_10314	0	0	Accessory
group_10315	0	0	Accessory
group_10316	0	0	Accessory
group_10317	0	0	Accessory
group_10318	0	0	Accessory
group_10319	0	0	Accessory
group_1032	0	0	Accessory
group_10320	0	0	Accessory
group_10321	0	0	Accessory
group_10322	0	0	Accessory
group_10323	0	0	Accessory
group_10324	0	0	Accessory
group_10325	0	0	Accessory
group_10326	0	0	Accessory
group_10327	0	0	Accessory
group_10328	0	0	Accessory
group_10329	0	0	Accessory
group_1033	0	0	Accessory
group_10330	0	0	Accessory
group_10331	1	7.14286	Accessory
group_10332	1	7.14286	Accessory
group_10333	0	0	Accessory
group_10334	0	0	Accessory
group_10335	1	7.14286	Accessory
group_10336	1	7.14286	Accessory
group_10337	1	7.14286	Accessory
group_10338	0	0	Accessory
group_10339	0	0	Accessory
group_1034	0	0	Accessory
group_10340	0	0	Accessory
group_10341	0	0	Accessory
group_10342	0	0	Accessory
group_10343	0	0	Accessory
group_10344	0	0	Accessory
group_10345	0	0	Accessory
group_10346	0	0	Accessory
group_10347	1	7.14286	Accessory
group_10348	0	0	Accessory
group_10349	0	0	Accessory
group_1035	0	0	Accessory
group_10350	0	0	Accessory
group_10351	0	0	Accessory
group_10352	0	0	Accessory
group_10353	0	0	Accessory
group_10354	0	0	Accessory
group_10355	0	0	Accessory
group_10356	0	0	Accessory
group_10357	0	0	Accessory
group_10358	0	0	Accessory
group_10359	0	0	Accessory
group_1036	0	0	Accessory
group_10360	1	7.14286	Accessory
group_10361	1	7.14286	Accessory
group_10362	1	7.14286	Accessory
group_10363	0	0	Accessory
group_10364	0	0	Accessory
group_10365	0	0	Accessory
group_10366	0	0	Accessory
group_10367	1	7.14286	Accessory
group_10368	1	7.14286	Accessory
group_10369	1	7.14286	Accessory
group_1037	0	0	Accessory
group_10370	0	0	Accessory
group_10371	0	0	Accessory
group_10372	0	0	Accessory
group_10373	0	0	Accessory
group_10374	0	0	Accessory
group_10375	0	0	Accessory
group_10376	0	0	Accessory
group_10377	0	0	Accessory
group_10378	0	0	Accessory
group_10379	0	0	Accessory
group_1038	1	7.14286	Accessory
group_10380	0	0	Accessory
group_10381	0	0	Accessory
group_10382	0	0	Accessory
group_10383	0	0	Accessory
group_10384	1	7.14286	Accessory
group_10385	0	0	Accessory
group_10386	0	0	Accessory
group_10387	0	0	Accessory
group_10388	0	0	Accessory
group_10389	0	0	Accessory
group_1039	0	0	Accessory
group_10390	0	0	Accessory
group_10391	0	0	Accessory
group_10392	0	0	Accessory
group_10393	0	0	Accessory
group_10394	1	7.14286	Accessory
group_10395	1	7.14286	Accessory
group_10396	1	7.14286	Accessory
group_10397	0	0	Accessory
group_10398	1	7.14286	Accessory
group_10399	1	7.14286	Accessory
group_104	0	0	Accessory
group_1040	0	0	Accessory
group_10400	1	7.14286	Accessory
group_10401	0	0	Accessory
group_10402	0	0	Accessory
group_10403	0	0	Accessory
group_10404	0	0	Accessory
group_10405	0	0	Accessory
group_10406	0	0	Accessory
group_10407	0	0	Accessory
group_10408	0	0	Accessory
group_10409	0	0	Accessory
group_1041	0	0	Accessory
group_10410	0	0	Accessory
group_10411	0	0	Accessory
group_10412	0	0	Accessory
group_10413	0	0	Accessory
group_10414	0	0	Accessory
group_10415	0	0	Accessory
group_10416	0	0	Accessory
group_10417	0	0	Accessory
group_10418	0	0	Accessory
group_10419	0	0	Accessory
group_1042	0	0	Accessory
group_10420	0	0	Accessory
group_10421	0	0	Accessory
group_10422	0	0	Accessory
group_10423	0	0	Accessory
group_10424	0	0	Accessory
group_10425	0	0	Accessory
group_10426	0	0	Accessory
group_10427	0	0	Accessory
group_10428	0	0	Accessory
group_10429	1	7.14286	Accessory
group_1043	0	0	Accessory
group_10430	1	7.14286	Accessory
group_10431	1	7.14286	Accessory
group_10432	1	7.14286	Accessory
group_10433	0	0	Accessory
group_10434	0	0	Accessory
group_10435	0	0	Accessory
group_10436	1	7.14286	Accessory
group_10437	1	7.14286	Accessory
group_10438	1	7.14286	Accessory
group_10439	1	7.14286	Accessory
group_1044	0	0	Accessory
group_10440	1	7.14286	Accessory
group_10441	1	7.14286	Accessory
group_10442	1	7.14286	Accessory
group_10443	0	0	Accessory
group_10444	0	0	Accessory
group_10445	0	0	Accessory
group_10446	0	0	Accessory
group_10447	0	0	Accessory
group_10448	0	0	Accessory
group_10449	0	0	Accessory
group_1045	1	7.14286	Accessory
group_10450	0	0	Accessory
group_10451	1	7.14286	Accessory
group_10452	0	0	Accessory
group_10453	0	0	Accessory
group_10454	0	0	Accessory
group_10455	0	0	Accessory
group_10456	0	0	Accessory
group_10457	0	0	Accessory
group_10458	0	0	Accessory
group_10459	0	0	Accessory
group_1046	0	0	Accessory
group_10460	0	0	Accessory
group_10461	0	0	Accessory
group_10462	0	0	Accessory
group_10463	3	21.4286	Accessory
group_10464	1	7.14286	Accessory
group_10465	0	0	Accessory
group_10466	0	0	Accessory
group_10467	0	0	Accessory
group_10468	0	0	Accessory
group_10469	0	0	Accessory
group_1047	0	0	Accessory
group_10470	0	0	Accessory
group_10471	1	7.14286	Accessory
group_10472	0	0	Accessory
group_10473	0	0	Accessory
group_10474	0	0	Accessory
group_10475	0	0	Accessory
group_10476	0	0	Accessory
group_10477	0	0	Accessory
group_10478	1	7.14286	Accessory
group_10479	0	0	Accessory
group_1048	0	0	Accessory
group_10480	0	0	Accessory
group_10481	0	0	Accessory
group_10482	0	0	Accessory
group_10483	0	0	Accessory
group_10484	0	0	Accessory
group_10485	1	7.14286	Accessory
group_10486	1	7.14286	Accessory
group_10487	1	7.14286	Accessory
group_10488	0	0	Accessory
group_10489	0	0	Accessory
group_1049	0	0	Accessory
group_10490	0	0	Accessory
group_10491	0	0	Accessory
group_10492	0	0	Accessory
group_10493	0	0	Accessory
group_10494	0	0	Accessory
group_10495	0	0	Accessory
group_10496	1	7.14286	Accessory
group_10497	1	7.14286	Accessory
group_10498	3	21.4286	Accessory
group_10499	0	0	Accessory
group_105	0	0	Accessory
group_1050	0	0	Accessory
group_10500	0	0	Accessory
group_10501	0	0	Accessory
group_10502	0	0	Accessory
group_10503	0	0	Accessory
group_10504	0	0	Accessory
group_10505	0	0	Accessory
group_10506	0	0	Accessory
group_10507	0	0	Accessory
group_10508	2	14.2857	Accessory
group_10509	0	0	Accessory
group_1051	0	0	Accessory
group_10510	0	0	Accessory
group_10511	0	0	Accessory
group_10512	0	0	Accessory
group_10513	0	0	Accessory
group_10514	0	0	Accessory
group_10515	0	0	Accessory
group_10516	0	0	Accessory
group_10517	0	0	Accessory
group_10518	0	0	Accessory
group_10519	0	0	Accessory
group_1052	0	0	Accessory
group_10520	0	0	Accessory
group_10521	1	7.14286	Accessory
group_10522	0	0	Accessory
group_10523	0	0	Accessory
group_10524	0	0	Accessory
group_10525	1	7.14286	Accessory
group_10526	1	7.14286	Accessory
group_10527	1	7.14286	Accessory
group_10528	1	7.14286	Accessory
group_10529	0	0	Accessory
group_1053	1	7.14286	Accessory
group_10530	0	0	Accessory
group_10531	0	0	Accessory
group_10532	0	0	Accessory
group_10533	0	0	Accessory
group_10534	0	0	Accessory
group_10535	0	0	Accessory
group_10536	0	0	Accessory
group_10537	0	0	Accessory
group_10538	0	0	Accessory
group_10539	0	0	Accessory
group_1054	1	7.14286	Accessory
group_10540	0	0	Accessory
group_10541	0	0	Accessory
group_10542	0	0	Accessory
group_10543	0	0	Accessory
group_10544	1	7.14286	Accessory
group_10545	0	0	Accessory
group_10546	0	0	Accessory
group_10547	0	0	Accessory
group_10548	0	0	Accessory
group_10549	0	0	Accessory
group_1055	0	0	Accessory
group_10550	1	7.14286	Accessory
group_10551	1	7.14286	Accessory
group_10552	1	7.14286	Accessory
group_10553	0	0	Accessory
group_10554	0	0	Accessory
group_10555	0	0	Accessory
group_10556	0	0	Accessory
group_10557	0	0	Accessory
group_10558	0	0	Accessory
group_10559	1	7.14286	Accessory
group_1056	0	0	Accessory
group_10560	1	7.14286	Accessory
group_10561	1	7.14286	Accessory
group_10562	1	7.14286	Accessory
group_10563	1	7.14286	Accessory
group_10564	0	0	Accessory
group_10565	0	0	Accessory
group_10566	0	0	Accessory
group_10567	0	0	Accessory
group_10568	1	7.14286	Accessory
group_10569	1	7.14286	Accessory
group_1057	0	0	Accessory
group_10570	1	7.14286	Accessory
group_10571	0	0	Accessory
group_10572	0	0	Accessory
group_10573	0	0	Accessory
group_10574	0	0	Accessory
group_10575	1	7.14286	Accessory
group_10576	0	0	Accessory
group_10577	0	0	Accessory
group_10578	0	0	Accessory
group_10579	0	0	Accessory
group_1058	2	14.2857	Accessory
group_10580	0	0	Accessory
group_10581	0	0	Accessory
group_10582	0	0	Accessory
group_10583	0	0	Accessory
group_10584	0	0	Accessory
group_10585	0	0	Accessory
group_10586	0	0	Accessory
group_10587	0	0	Accessory
group_10588	0	0	Accessory
group_10589	2	14.2857	Accessory
group_1059	4	28.5714	Accessory
group_10590	0	0	Accessory
group_10591	0	0	Accessory
group_10592	0	0	Accessory
group_10593	0	0	Accessory
group_10594	0	0	Accessory
group_10595	0	0	Accessory
group_10596	0	0	Accessory
group_10597	0	0	Accessory
group_10598	0	0	Accessory
group_10599	1	7.14286	Accessory
group_106	0	0	Accessory
group_1060	3	21.4286	Accessory
group_10600	0	0	Accessory
group_10601	1	7.14286	Accessory
group_10602	1	7.14286	Accessory
group_10603	1	7.14286	Accessory
group_10604	1	7.14286	Accessory
group_10605	0	0	Accessory
group_10606	0	0	Accessory
group_10607	0	0	Accessory
group_10608	0	0	Accessory
group_10609	0	0	Accessory
group_1061	0	0	Accessory
group_10610	0	0	Accessory
group_10611	0	0	Accessory
group_10612	0	0	Accessory
group_10613	0	0	Accessory
group_10614	1	7.14286	Accessory
group_10615	1	7.14286	Accessory
group_10616	0	0	Accessory
group_10617	0	0	Accessory
group_10618	0	0	Accessory
group_10619	0	0	Accessory
group_1062	1	7.14286	Accessory
group_10620	0	0	Accessory
group_10621	0	0	Accessory
group_10622	0	0	Accessory
group_10623	0	0	Accessory
group_10624	0	0	Accessory
group_10625	0	0	Accessory
group_10626	0	0	Accessory
group_10627	0	0	Accessory
group_10628	0	0	Accessory
group_10629	0	0	Accessory
group_1063	0	0	Accessory
group_10630	0	0	Accessory
group_10631	0	0	Accessory
group_10632	0	0	Accessory
group_10633	0	0	Accessory
group_10634	0	0	Accessory
group_10635	1	7.14286	Accessory
group_10636	1	7.14286	Accessory
group_10637	0	0	Accessory
group_10638	0	0	Accessory
group_10639	0	0	Accessory
group_1064	0	0	Accessory
group_10640	0	0	Accessory
group_10641	1	7.14286	Accessory
group_10642	0	0	Accessory
group_10643	0	0	Accessory
group_10644	0	0	Accessory
group_10645	0	0	Accessory
group_10646	0	0	Accessory
group_10647	0	0	Accessory
group_10648	0	0	Accessory
group_10649	0	0	Accessory
group_1065	0	0	Accessory
group_10650	0	0	Accessory
group_10651	0	0	Accessory
group_10652	0	0	Accessory
group_10653	0	0	Accessory
group_10654	0	0	Accessory
group_10655	0	0	Accessory
group_10656	0	0	Accessory
group_10657	0	0	Accessory
group_10658	0	0	Accessory
group_10659	0	0	Accessory
group_1066	0	0	Accessory
group_10660	0	0	Accessory
group_10661	1	7.14286	Accessory
group_10662	0	0	Accessory
group_10663	0	0	Accessory
group_10664	0	0	Accessory
group_10665	0	0	Accessory
group_10666	1	7.14286	Accessory
group_10667	1	7.14286	Accessory
group_10668	1	7.14286	Accessory
group_10669	1	7.14286	Accessory
group_1067	0	0	Accessory
group_10670	1	7.14286	Accessory
group_10671	1	7.14286	Accessory
group_10672	0	0	Accessory
group_10673	0	0	Accessory
group_10674	0	0	Accessory
group_10675	0	0	Accessory
group_10676	0	0	Accessory
group_10677	0	0	Accessory
group_10678	0	0	Accessory
group_10679	0	0	Accessory
group_1068	1	7.14286	Accessory
group_10680	0	0	Accessory
group_10681	0	0	Accessory
group_10682	0	0	Accessory
group_10683	0	0	Accessory
group_10684	0	0	Accessory
group_10685	1	7.14286	Accessory
group_10686	1	7.14286	Accessory
group_10687	0	0	Accessory
group_10688	1	7.14286	Accessory
group_10689	1	7.14286	Accessory
group_1069	2	14.2857	Accessory
group_10690	0	0	Accessory
group_10691	0	0	Accessory
group_10692	0	0	Accessory
group_10693	0	0	Accessory
group_10694	0	0	Accessory
group_10695	0	0	Accessory
group_10696	0	0	Accessory
group_10697	0	0	Accessory
group_10698	0	0	Accessory
group_10699	0	0	Accessory
group_107	0	0	Accessory
group_1070	0	0	Accessory
group_10700	0	0	Accessory
group_10701	0	0	Accessory
group_10702	0	0	Accessory
group_10703	0	0	Accessory
group_10704	0	0	Accessory
group_10705	0	0	Accessory
group_10706	0	0	Accessory
group_10707	0	0	Accessory
group_10708	1	7.14286	Accessory
group_10709	1	7.14286	Accessory
group_1071	0	0	Accessory
group_10710	1	7.14286	Accessory
group_10711	1	7.14286	Accessory
group_10712	1	7.14286	Accessory
group_10713	1	7.14286	Accessory
group_10714	0	0	Accessory
group_10715	0	0	Accessory
group_10716	0	0	Accessory
group_10717	0	0	Accessory
group_10718	0	0	Accessory
group_10719	0	0	Accessory
group_1072	0	0	Accessory
group_10720	0	0	Accessory
group_10721	0	0	Accessory
group_10722	1	7.14286	Accessory
group_10723	1	7.14286	Accessory
group_10724	1	7.14286	Accessory
group_10725	1	7.14286	Accessory
group_10726	0	0	Accessory
group_10727	0	0	Accessory
group_10728	0	0	Accessory
group_10729	0	0	Accessory
group_1073	0	0	Accessory
group_10730	0	0	Accessory
group_10731	0	0	Accessory
group_10732	0	0	Accessory
group_10733	0	0	Accessory
group_10734	0	0	Accessory
group_10735	0	0	Accessory
group_10736	0	0	Accessory
group_10737	0	0	Accessory
group_10738	0	0	Accessory
group_10739	0	0	Accessory
group_1074	0	0	Accessory
group_10740	1	7.14286	Accessory
group_10741	0	0	Accessory
group_10742	0	0	Accessory
group_10743	1	7.14286	Accessory
group_10744	0	0	Accessory
group_10745	0	0	Accessory
group_10746	0	0	Accessory
group_10747	0	0	Accessory
group_10748	0	0	Accessory
group_10749	0	0	Accessory
group_1075	0	0	Accessory
group_10750	0	0	Accessory
group_10751	1	7.14286	Accessory
group_10752	1	7.14286	Accessory
group_10753	1	7.14286	Accessory
group_10754	1	7.14286	Accessory
group_10755	0	0	Accessory
group_10756	0	0	Accessory
group_10757	0	0	Accessory
group_10758	0	0	Accessory
group_10759	1	7.14286	Accessory
group_1076	1	7.14286	Accessory
group_10760	1	7.14286	Accessory
group_10761	1	7.14286	Accessory
group_10762	0	0	Accessory
group_10763	0	0	Accessory
group_10764	0	0	Accessory
group_10765	0	0	Accessory
group_10766	0	0	Accessory
group_10767	0	0	Accessory
group_10768	0	0	Accessory
group_10769	0	0	Accessory
group_1077	0	0	Accessory
group_10770	0	0	Accessory
group_10771	0	0	Accessory
group_10772	0	0	Accessory
group_10773	0	0	Accessory
group_10774	0	0	Accessory
group_10775	0	0	Accessory
group_10776	0	0	Accessory
group_10777	0	0	Accessory
group_10778	0	0	Accessory
group_10779	0	0	Accessory
group_1078	0	0	Accessory
group_10780	0	0	Accessory
group_10781	0	0	Accessory
group_10782	0	0	Accessory
group_10783	0	0	Accessory
group_10784	0	0	Accessory
group_10785	0	0	Accessory
group_10786	2	14.2857	Accessory
group_10787	1	7.14286	Accessory
group_10788	0	0	Accessory
group_10789	0	0	Accessory
group_1079	3	21.4286	Accessory
group_10790	0	0	Accessory
group_10791	3	21.4286	Accessory
group_10792	0	0	Accessory
group_10793	0	0	Accessory
group_10794	0	0	Accessory
group_10795	0	0	Accessory
group_10796	0	0	Accessory
group_10797	0	0	Accessory
group_10798	0	0	Accessory
group_10799	1	7.14286	Accessory
group_108	0	0	Accessory
group_1080	1	7.14286	Accessory
group_10800	1	7.14286	Accessory
group_10801	0	0	Accessory
group_10802	0	0	Accessory
group_10803	0	0	Accessory
group_10804	0	0	Accessory
group_10805	0	0	Accessory
group_10806	1	7.14286	Accessory
group_10807	0	0	Accessory
group_10808	0	0	Accessory
group_10809	0	0	Accessory
group_1081	0	0	Accessory
group_10810	0	0	Accessory
group_10811	0	0	Accessory
group_10812	0	0	Accessory
group_10813	0	0	Accessory
group_10814	0	0	Accessory
group_10815	0	0	Accessory
group_10816	0	0	Accessory
group_10817	0	0	Accessory
group_10818	0	0	Accessory
group_10819	0	0	Accessory
group_1082	0	0	Accessory
group_10820	0	0	Accessory
group_10821	0	0	Accessory
group_10822	0	0	Accessory
group_10823	0	0	Accessory
group_10824	0	0	Accessory
group_10825	0	0	Accessory
group_10826	0	0	Accessory
group_10827	1	7.14286	Accessory
group_10828	1	7.14286	Accessory
group_10829	0	0	Accessory
group_1083	0	0	Accessory
group_10830	2	14.2857	Accessory
group_10831	0	0	Accessory
group_10832	0	0	Accessory
group_10833	0	0	Accessory
group_10834	0	0	Accessory
group_10835	0	0	Accessory
group_10836	0	0	Accessory
group_10837	0	0	Accessory
group_10838	0	0	Accessory
group_10839	0	0	Accessory
group_1084	0	0	Accessory
group_10840	0	0	Accessory
group_10841	1	7.14286	Accessory
group_10842	1	7.14286	Accessory
group_10843	1	7.14286	Accessory
group_10844	1	7.14286	Accessory
group_10845	0	0	Accessory
group_10846	0	0	Accessory
group_10847	0	0	Accessory
group_10848	0	0	Accessory
group_10849	1	7.14286	Accessory
group_1085	0	0	Accessory
group_10850	1	7.14286	Accessory
group_10851	0	0	Accessory
group_10852	0	0	Accessory
group_10853	0	0	Accessory
group_10854	0	0	Accessory
group_10855	0	0	Accessory
group_10856	0	0	Accessory
group_10857	0	0	Accessory
group_10858	0	0	Accessory
group_10859	0	0	Accessory
group_1086	0	0	Accessory
group_10860	0	0	Accessory
group_10861	0	0	Accessory
group_10862	0	0	Accessory
group_10863	1	7.14286	Accessory
group_10864	0	0	Accessory
group_10865	0	0	Accessory
group_10866	0	0	Accessory
group_10867	1	7.14286	Accessory
group_10868	1	7.14286	Accessory
group_10869	0	0	Accessory
group_1087	0	0	Accessory
group_10870	0	0	Accessory
group_10871	0	0	Accessory
group_10872	0	0	Accessory
group_10873	0	0	Accessory
group_10874	0	0	Accessory
group_10875	0	0	Accessory
group_10876	0	0	Accessory
group_10877	0	0	Accessory
group_10878	0	0	Accessory
group_10879	0	0	Accessory
group_1088	0	0	Accessory
group_10880	0	0	Accessory
group_10881	1	7.14286	Accessory
group_10882	1	7.14286	Accessory
group_10883	1	7.14286	Accessory
group_10884	0	0	Accessory
group_10885	0	0	Accessory
group_10886	0	0	Accessory
group_10887	0	0	Accessory
group_10888	0	0	Accessory
group_10889	1	7.14286	Accessory
group_1089	1	7.14286	Accessory
group_10890	1	7.14286	Accessory
group_10891	1	7.14286	Accessory
group_10892	0	0	Accessory
group_10893	0	0	Accessory
group_10894	0	0	Accessory
group_10895	0	0	Accessory
group_10896	0	0	Accessory
group_10897	0	0	Accessory
group_10898	0	0	Accessory
group_10899	0	0	Accessory
group_109	9	64.2857	Accessory
group_1090	0	0	Accessory
group_10900	0	0	Accessory
group_10901	0	0	Accessory
group_10902	0	0	Accessory
group_10903	0	0	Accessory
group_10904	0	0	Accessory
group_10905	0	0	Accessory
group_10906	0	0	Accessory
group_10907	0	0	Accessory
group_10908	0	0	Accessory
group_10909	0	0	Accessory
group_1091	0	0	Accessory
group_10910	0	0	Accessory
group_10911	0	0	Accessory
group_10912	1	7.14286	Accessory
group_10913	0	0	Accessory
group_10914	0	0	Accessory
group_10915	0	0	Accessory
group_10916	0	0	Accessory
group_10917	0	0	Accessory
group_10918	1	7.14286	Accessory
group_10919	0	0	Accessory
group_1092	0	0	Accessory
group_10920	0	0	Accessory
group_10921	0	0	Accessory
group_10922	0	0	Accessory
group_10923	1	7.14286	Accessory
group_10924	1	7.14286	Accessory
group_10925	0	0	Accessory
group_10926	0	0	Accessory
group_10927	0	0	Accessory
group_10928	0	0	Accessory
group_10929	0	0	Accessory
group_1093	0	0	Accessory
group_10930	0	0	Accessory
group_10931	0	0	Accessory
group_10932	0	0	Accessory
group_10933	0	0	Accessory
group_10934	0	0	Accessory
group_10935	0	0	Accessory
group_10936	1	7.14286	Accessory
group_10937	0	0	Accessory
group_10938	0	0	Accessory
group_10939	0	0	Accessory
group_1094	1	7.14286	Accessory
group_10940	0	0	Accessory
group_10941	0	0	Accessory
group_10942	1	7.14286	Accessory
group_10943	0	0	Accessory
group_10944	0	0	Accessory
group_10945	0	0	Accessory
group_10946	0	0	Accessory
group_10947	0	0	Accessory
group_10948	1	7.14286	Accessory
group_10949	1	7.14286	Accessory
group_1095	5	35.7143	Accessory
group_10950	1	7.14286	Accessory
group_10951	1	7.14286	Accessory
group_10952	0	0	Accessory
group_10953	0	0	Accessory
group_10954	0	0	Accessory
group_10955	0	0	Accessory
group_10956	1	7.14286	Accessory
group_10957	1	7.14286	Accessory
group_10958	0	0	Accessory
group_10959	0	0	Accessory
group_1096	0	0	Accessory
group_10960	0	0	Accessory
group_10961	0	0	Accessory
group_10962	0	0	Accessory
group_10963	0	0	Accessory
group_10964	0	0	Accessory
group_10965	0	0	Accessory
group_10966	0	0	Accessory
group_10967	0	0	Accessory
group_10968	0	0	Accessory
group_10969	1	7.14286	Accessory
group_1097	0	0	Accessory
group_10970	0	0	Accessory
group_10971	0	0	Accessory
group_10972	1	7.14286	Accessory
group_10973	0	0	Accessory
group_10974	0	0	Accessory
group_10975	0	0	Accessory
group_10976	0	0	Accessory
group_10977	0	0	Accessory
group_10978	0	0	Accessory
group_10979	0	0	Accessory
group_1098	3	21.4286	Accessory
group_10980	0	0	Accessory
group_10981	0	0	Accessory
group_10982	0	0	Accessory
group_10983	0	0	Accessory
group_10984	0	0	Accessory
group_10985	0	0	Accessory
group_10986	0	0	Accessory
group_10987	0	0	Accessory
group_10988	0	0	Accessory
group_10989	0	0	Accessory
group_1099	6	42.8571	Accessory
group_10990	1	7.14286	Accessory
group_10991	0	0	Accessory
group_10992	1	7.14286	Accessory
group_10993	1	7.14286	Accessory
group_10994	1	7.14286	Accessory
group_10995	0	0	Accessory
group_10996	0	0	Accessory
group_10997	0	0	Accessory
group_10998	0	0	Accessory
group_10999	0	0	Accessory
group_11	0	0	Accessory
group_110	0	0	Accessory
group_1100	0	0	Accessory
group_11000	1	7.14286	Accessory
group_11001	1	7.14286	Accessory
group_11002	0	0	Accessory
group_11003	0	0	Accessory
group_11004	0	0	Accessory
group_11005	0	0	Accessory
group_11006	0	0	Accessory
group_11007	0	0	Accessory
group_11008	0	0	Accessory
group_11009	0	0	Accessory
group_1101	2	14.2857	Accessory
group_11010	0	0	Accessory
group_11011	0	0	Accessory
group_11012	0	0	Accessory
group_11013	0	0	Accessory
group_11014	0	0	Accessory
group_11015	0	0	Accessory
group_11016	0	0	Accessory
group_11017	0	0	Accessory
group_11018	0	0	Accessory
group_11019	0	0	Accessory
group_1102	0	0	Accessory
group_11020	0	0	Accessory
group_11021	0	0	Accessory
group_11022	0	0	Accessory
group_11023	0	0	Accessory
group_11024	0	0	Accessory
group_11025	0	0	Accessory
group_11026	0	0	Accessory
group_11027	1	7.14286	Accessory
group_11028	0	0	Accessory
group_11029	1	7.14286	Accessory
group_1103	0	0	Accessory
group_11030	1	7.14286	Accessory
group_11031	1	7.14286	Accessory
group_11032	0	0	Accessory
group_11033	0	0	Accessory
group_11034	0	0	Accessory
group_11035	0	0	Accessory
group_11036	0	0	Accessory
group_11037	1	7.14286	Accessory
group_11038	1	7.14286	Accessory
group_11039	0	0	Accessory
group_1104	0	0	Accessory
group_11040	0	0	Accessory
group_11041	0	0	Accessory
group_11042	0	0	Accessory
group_11043	0	0	Accessory
group_11044	0	0	Accessory
group_11045	1	7.14286	Accessory
group_11046	1	7.14286	Accessory
group_11047	1	7.14286	Accessory
group_11048	0	0	Accessory
group_11049	0	0	Accessory
group_1105	0	0	Accessory
group_11050	0	0	Accessory
group_11051	0	0	Accessory
group_11052	0	0	Accessory
group_11053	0	0	Accessory
group_11054	0	0	Accessory
group_11055	0	0	Accessory
group_11056	0	0	Accessory
group_11057	0	0	Accessory
group_11058	0	0	Accessory
group_11059	0	0	Accessory
group_1106	0	0	Accessory
group_11060	0	0	Accessory
group_11061	0	0	Accessory
group_11062	0	0	Accessory
group_11063	0	0	Accessory
group_11064	0	0	Accessory
group_11065	0	0	Accessory
group_11066	0	0	Accessory
group_11067	0	0	Accessory
group_11068	0	0	Accessory
group_11069	0	0	Accessory
group_1107	0	0	Accessory
group_11070	0	0	Accessory
group_11071	0	0	Accessory
group_11072	0	0	Accessory
group_11073	0	0	Accessory
group_11074	0	0	Accessory
group_11075	0	0	Accessory
group_11076	0	0	Accessory
group_11077	0	0	Accessory
group_11078	0	0	Accessory
group_11079	0	0	Accessory
group_1108	5	35.7143	Accessory
group_11080	1	7.14286	Accessory
group_11081	1	7.14286	Accessory
group_11082	1	7.14286	Accessory
group_11083	0	0	Accessory
group_11084	0	0	Accessory
group_11085	0	0	Accessory
group_11086	0	0	Accessory
group_11087	0	0	Accessory
group_11088	0	0	Accessory
group_11089	1	7.14286	Accessory
group_1109	5	35.7143	Accessory
group_11090	1	7.14286	Accessory
group_11091	1	7.14286	Accessory
group_11092	1	7.14286	Accessory
group_11093	0	0	Accessory
group_11094	0	0	Accessory
group_11095	0	0	Accessory
group_11096	0	0	Accessory
group_11097	0	0	Accessory
group_11098	0	0	Accessory
group_11099	0	0	Accessory
group_111	0	0	Accessory
group_1110	0	0	Accessory
group_11100	0	0	Accessory
group_11101	0	0	Accessory
group_11102	0	0	Accessory
group_11103	0	0	Accessory
group_11104	0	0	Accessory
group_11105	0	0	Accessory
group_11106	0	0	Accessory
group_11107	1	7.14286	Accessory
group_11108	1	7.14286	Accessory
group_11109	1	7.14286	Accessory
group_1111	9	64.2857	Accessory
group_11110	0	0	Accessory
group_11111	0	0	Accessory
group_11112	0	0	Accessory
group_11113	0	0	Accessory
group_11114	0	0	Accessory
group_11115	1	7.14286	Accessory
group_11116	0	0	Accessory
[truncated: 23,138 more rows]
