# Supplementary material for: The Genomic Landscape of Head and Neck Cancer-associated Streptococci
Source: Research Square preprint supplement (doi:10.21203/rs.3.rs-8400357/v1), 2026-01-09
Supplement: Supplementary file 4 [file 5548018cd8165f79d3baf70e.xlsx]

## Sheet: genome_all
Supplementary Table 1: Per-isolate genome size & GC content
isolate_id	genome_size	gc_content	Source	Species
ODP-AF03-102	2022867	41.1043	Healthy	Strep. oralis
ODP-AF04-102	2117734	39.7884	Healthy	Strep. salivarius
ODP-AF04-103	2145839	39.7415	Healthy	Strep. salivarius
ODP-AF04-106	2122229	39.7911	Healthy	Strep. salivarius
ODP-AF04-107	2120114	39.797	Healthy	Strep. salivarius
ODP-AF04-108	2116472	39.7884	Healthy	Strep. salivarius
ODP-AF04-238	2350527	43.1994	Healthy	Strep. sanguinis
ODP-AF04-243	2351938	43.1929	Healthy	Strep. sanguinis
ODP-AF04-71	2120511	39.797	Healthy	Strep. salivarius
ODP-AF04-87	2120353	39.7984	Healthy	Strep. salivarius
ODP-AF04-91	2146012	39.7387	Healthy	Strep. salivarius
ODP-AF04-99	2145261	39.7419	Healthy	Strep. salivarius
ODP-AF05-203	1834641	38.8173	Healthy	Strep. anginosus
ODP-AF05-68	2050257	41.9311	Healthy	Strep. parasanguinis
ODP-AF05-69	2041918	41.9988	Healthy	Strep. parasanguinis
ODP-AF05-77	2141963	39.7369	Healthy	Strep. salivarius
ODP-AF06-108	1880222	41.0862	Healthy	Strep. oralis
ODP-AF06-99	1818364	40.3525	Healthy	Strep. mitis
ODP-AF08-1-MRS	2373645	43.3638	Healthy	Strep. sanguinis
ODP-AF08-10-MRS	1960945	41.328	Healthy	Strep. oralis
ODP-AF08-11-MRS	2379493	43.1134	Healthy	Strep. sanguinis
ODP-AF08-11-O-MRS	1970637	38.6277	Healthy	Strep. anginosus
ODP-AF08-13-MRS	1810344	38.0174	Healthy	Strep. constellatus
ODP-AF08-15-MRS	1876087	38.9135	Healthy	Strep. anginosus
ODP-AF08-16-MRS	1810526	38.016	Healthy	Strep. constellatus
ODP-AF08-17-MRS	2279432	42.902	Healthy	Strep. sanguinis
ODP-AF08-18-MRS	2374898	43.3627	Healthy	Strep. sanguinis
ODP-AF08-18-O-MRS	2323452	39.5237	Healthy	Strep. salivarius
ODP-AF08-2-MRS	1936709	38.6629	Healthy	Strep. anginosus
ODP-AF08-2	2005881	41.3921	Healthy	Strep. oralis
ODP-AF08-20-MRS	1811525	38.0164	Healthy	Strep. constellatus
ODP-AF08-21-MRS	1961274	41.3275	Healthy	Strep. oralis
ODP-AF08-23-MRS	1961305	41.329	Healthy	Strep. oralis
ODP-AF08-27-O-MRS	1970212	38.6246	Healthy	Strep. anginosus
ODP-AF08-3	1772698	38.2487	Healthy	Strep. constellatus
ODP-AF08-35-MRS	1962375	41.3319	Healthy	Strep. oralis
ODP-AF08-36-MRS	1960774	41.3271	Healthy	Strep. oralis
ODP-AF08-38-MRS	1953671	41.1962	Healthy	Strep. mitis
ODP-AF08-40-MRS	1811132	38.0156	Healthy	Strep. constellatus
ODP-AF08-41-MRS	1960813	41.3288	Healthy	Strep. oralis
ODP-AF08-7-MRS	1960994	41.3282	Healthy	Strep. oralis
ODP-AF08-8-MRS	1961382	41.3279	Healthy	Strep. oralis
ODP-AF10-C23	2064853	39.8253	Healthy	Strep. mitis
ODP-AF10-C6	1883390	38.0087	Healthy	Strep. constellatus
ODP-AM01-02BB	1973256	41.1573	Healthy	Strep. oralis
ODP-AM01-08	1949968	41.242	Healthy	Strep. oralis
ODP-AM04-107	2155398	39.9108	Healthy	Strep. salivarius
ODP-AM04-38	2215701	39.6861	Healthy	Strep. salivarius
ODP-AM04-44	2075293	40.0236	Healthy	Strep. salivarius
ODP-AM04-46	2152910	39.9067	Healthy	Strep. salivarius
ODP-AM05-19	1904404	41.0093	Healthy	Strep. oralis
ODP-AM05-237	2126278	39.9157	Healthy	Strep. salivarius
ODP-AM05-24	2151071	40.6307	Healthy	Strep. gordonii
ODP-AM05-243	2325881	43.4298	Healthy	Strep. sanguinis
ODP-AM05-244	1940956	38.5614	Healthy	Strep. anginosus
ODP-AM05-247	2326672	43.4381	Healthy	Strep. sanguinis
ODP-AM05-248	1941125	38.5596	Healthy	Strep. anginosus
ODP-AM05-25	1848823	41.3327	Healthy	Strep. mitis
ODP-AM05-254	2337455	43.4158	Healthy	Strep. sanguinis
ODP-AM05-264	1872783	41.2882	Healthy	Strep. mitis
ODP-AM05-265	1942173	38.5649	Healthy	Strep. anginosus
ODP-AM05-266	1873619	37.8834	Healthy	Strep. constellatus
ODP-AM05-267	1847424	41.3264	Healthy	Strep. mitis
ODP-AM05-273	1939897	38.5606	Healthy	Strep. anginosus
ODP-AM05-34	1940042	38.5641	Healthy	Strep. anginosus
ODP-AM05-395	1828527	37.8879	Healthy	Strep. constellatus
ODP-AM05-41	1942078	38.5648	Healthy	Strep. anginosus
ODP-AM05-415	2337705	43.4261	Healthy	Strep. sanguinis
ODP-AM05-429	2116213	39.944	Healthy	Strep. salivarius
ODP-AM05-49	1931130	41.0947	Healthy	Strep. mitis
ODP-AM05-501	2376514	43.3954	Healthy	Strep. sanguinis
ODP-AM05-503	2180937	40.5077	Healthy	Strep. gordonii
ODP-AM05-535	1850114	41.337	Healthy	Strep. mitis
ODP-AM05-72	2109436	39.926	Healthy	Strep. salivarius
ODP-AM05-73	2150986	40.6256	Healthy	Strep. gordonii
ODP-AM05-78	2151071	40.6259	Healthy	Strep. gordonii
ODP-AM05-80	1891412	40.9664	Healthy	Strep. oralis
ODP-AM08-275	2562932	38.8927	Healthy	Strep. salivarius
ODP-AM08-279	2272834	39.6736	Healthy	Strep. salivarius
ODP-AM08-292	2413112	43.2269	Healthy	Strep. sanguinis
ODP-AM08-308	2173194	40.3413	Healthy	Strep. gordonii
ODP-AM09-10-O-104	1952043	41.3191	Healthy	Strep. oralis
ODP-AM09-11-104	1849217	38.9062	Healthy	Strep. anginosus
ODP-AM09-11-BH	2170497	40.4418	Healthy	Strep. gordonii
ODP-AM09-12-O-104	1812900	38.0125	Healthy	Strep. constellatus
ODP-AM09-16-O-104	1962554	41.3199	Healthy	Strep. oralis
ODP-AM09-17-104	1982486	41.2712	Healthy	Strep. oralis
ODP-AM09-18-104	2171679	40.4487	Healthy	Strep. gordonii
ODP-AM09-22-104	2170153	40.4398	Healthy	Strep. gordonii
ODP-AM09-23-104	1997258	39.9133	Healthy	Strep. oralis
ODP-AM09-23-BH	1983472	41.2733	Healthy	Strep. oralis
ODP-AM09-23-O-104	1960083	41.3268	Healthy	Strep. oralis
ODP-AM09-26-104	1982443	41.2831	Healthy	Strep. oralis
ODP-AM09-27-104	1994632	39.8996	Healthy	Strep. oralis
ODP-AM09-2D1	2348649	39.378	Healthy	Strep. salivarius
ODP-AM09-2D16	2305104	39.336	Healthy	Strep. salivarius
ODP-AM09-2D2	2348202	39.3717	Healthy	Strep. salivarius
ODP-AM09-2D20	2325059	39.3064	Healthy	Strep. salivarius
ODP-AM09-2D4A	2325843	39.3912	Healthy	Strep. salivarius
ODP-AM09-2D4B	2347527	39.3744	Healthy	Strep. salivarius
ODP-AM09-2D5	2261726	39.6383	Healthy	Strep. salivarius
ODP-AM09-30-BH	1984086	42.0362	Healthy	Strep. parasanguinis
ODP-AM09-33-BH	1979474	39.9513	Healthy	Strep. mitis
ODP-AM09-34-BH	1984650	37.742	Healthy	Strep. constellatus
ODP-AM09-39-BH	2170485	40.4396	Healthy	Strep. gordonii
ODP-AM09-39-O-BH	1949594	39.8334	Healthy	Strep. mitis
ODP-AM09-4-O-104	1859592	37.8493	Healthy	Strep. constellatus
ODP-AM09-43-BH	2170947	40.4584	Healthy	Strep. gordonii
ODP-AM09-46-O-BH	1999691	39.8963	Healthy	Strep. oralis
ODP-AM09-48-O-BH	2170492	40.4421	Healthy	Strep. gordonii
ODP-AM09-49-O-BH	2183858	40.536	Healthy	Strep. oralis
ODP-AM09-5-104	2000104	39.8959	Healthy	Strep. oralis
ODP-AM09-5-O-104	2374888	43.3634	Healthy	Strep. sanguinis
ODP-AM09-8-104	2111663	42.1618	Healthy	Strep. parasanguinis
ODP-AM09-9-O-104	1960681	41.3276	Healthy	Strep. oralis
ODP-TM06-143	2206707	39.9008	Healthy	Strep. salivarius
ODP-TM06-164	2314750	43.3905	Healthy	Strep. sanguinis
ODP-TM06-50	2144305	40.5615	Healthy	Strep. gordonii
ODP-TM06-55	2191885	40.4643	Healthy	Strep. gordonii
ODP-TM07-162	1977926	41.2718	Healthy	Strep. oralis
ODP-TM07-209	1934823	41.0356	Healthy	Strep. oralis
ODP-TM07-212	1879540	41.0429	Healthy	Strep. mitis
ODP-TM07-272	1978721	41.2623	Healthy	Strep. oralis
ORS-AF03-170	1988299	40.0226	Healthy	Strep. mitis
ORS-AF04-129	2176348	41.7736	Healthy	Strep. parasanguinis
ORS-AF04-146	2123415	39.8024	Healthy	Strep. salivarius
ORS-AF04-234	2046453	42.0375	Healthy	Strep. parasanguinis
ORS-AF04-236	2444976	42.7778	Healthy	Strep. sanguinis
ORS-AF04-35	2349527	43.1929	Healthy	Strep. sanguinis
ORS-AF04-36	2118573	39.7902	Healthy	Strep. salivarius
ORS-AF04-41	2367971	43.1441	Healthy	Strep. sanguinis
ORS-AF04-54	2013295	41.0669	Healthy	Strep. oralis
ORS-AF04-59	2015263	41.0781	Healthy	Strep. oralis
ORS-AF05-10	2120353	39.7984	Healthy	Strep. salivarius
ORS-AF05-12	2146012	39.7387	Healthy	Strep. salivarius
ORS-AF05-14	2145261	39.7419	Healthy	Strep. salivarius
ORS-AF05-15	2117734	39.7884	Healthy	Strep. salivarius
ORS-AF05-16	2145839	39.7415	Healthy	Strep. salivarius
ORS-AF05-242	2207217	39.742	Healthy	Strep. salivarius
ORS-AF06-69	1842678	38.7833	Healthy	Strep. anginosus
ORS-AF08-14	1954751	41.3627	Healthy	Strep. oralis
ORS-AF08-15	2317395	39.5495	Healthy	Strep. salivarius
ORS-AF08-17	1937410	41.3296	Healthy	Strep. oralis
ORS-AF08-18	1791112	37.9468	Healthy	Strep. constellatus
ORS-AF08-19	1960041	41.3401	Healthy	Strep. oralis
ORS-AF08-2-MRS	2323589	39.5228	Healthy	Strep. salivarius
ORS-AF08-2	2015378	40.2335	Healthy	Strep. salivarius
ORS-AF08-20-MRS	2121313	39.6663	Healthy	Strep. salivarius
ORS-AF08-21	1935555	41.4883	Healthy	Strep. oralis
ORS-AF08-22	1920414	41.5232	Healthy	Strep. oralis
ORS-AF08-23-MRS	2324069	39.524	Healthy	Strep. salivarius
ORS-AF08-24	1923126	41.3618	Healthy	Strep. oralis
ORS-AF08-30-MRS	2322865	39.5204	Healthy	Strep. salivarius
ORS-AF08-4-MRS	1959544	41.3265	Healthy	Strep. oralis
ORS-AF08-5-MRS	2324033	39.5227	Healthy	Strep. salivarius
ORS-AF08-6	2095024	39.7263	Healthy	Strep. salivarius
ORS-AF08-7-MRS	2092201	39.765	Healthy	Strep. salivarius
ORS-AF08-9	2060855	39.7176	Healthy	Strep. salivarius
ORS-AF10-1-BH	2011019	42.1006	Healthy	Strep. parasanguinis
ORS-AF10-2-BH	2004771	42.1248	Healthy	Strep. parasanguinis
ORS-AF10-7-BH	1992540	41.2035	Healthy	Strep. oralis
ORS-AF10-9-BH	2008495	39.8607	Healthy	Strep. mitis
ORS-AF10-C8	2056705	39.8274	Healthy	Strep. mitis
ORS-AM01-02MB	2360306	43.1576	Healthy	Strep. sanguinis
ORS-AM01-04MB	1828086	38.0251	Healthy	Strep. constellatus
ORS-AM04-31	2218878	39.6997	Healthy	Strep. salivarius
ORS-AM04-35	2149855	39.9045	Healthy	Strep. salivarius
ORS-AM05-121	2177966	39.8654	Healthy	Strep. salivarius
ORS-AM05-122	1917657	41.0075	Healthy	Strep. oralis
ORS-AM05-138	1964455	41.0587	Healthy	Strep. mitis
ORS-AM05-141	1948971	41.0541	Healthy	Strep. mitis
ORS-AM05-155	2177966	39.8654	Healthy	Strep. salivarius
ORS-AM05-177	1827608	37.8465	Healthy	Strep. constellatus
ORS-AM05-183	1964455	41.0587	Healthy	Strep. mitis
ORS-AM05-365	1734004	38.773	Healthy	Strep. mitis
ORS-AM05-478	1659564	38.817	Healthy	Strep. mitis
ORS-AM05-484	2107721	39.9591	Healthy	Strep. salivarius
ORS-AM05-491	1897506	41.02	Healthy	Strep. oralis
ORS-AM05-494	2163965	39.8192	Healthy	Strep. salivarius
ORS-AM05-495	1863526	37.8565	Healthy	Strep. constellatus
ORS-AM08-119	2494349	39.244	Healthy	Strep. salivarius
ORS-AM08-15	2089427	39.912	Healthy	Strep. salivarius
ORS-AM08-168	2097545	42.0034	Healthy	Strep. parasanguinis
ORS-AM08-32	1831830	38.7663	Healthy	Strep. anginosus
ORS-AM08-42	2109102	41.7825	Healthy	Strep. parasanguinis
ORS-AM08-59	1832635	38.77	Healthy	Strep. anginosus
ORS-AM09-10-O-104	2329441	42.8042	Healthy	Strep. sanguinis
ORS-AM09-11-O-104	1961089	41.331	Healthy	Strep. oralis
ORS-AM09-12-104	2336822	39.3574	Healthy	Strep. salivarius
ORS-AM09-15-O-104	2101062	39.7811	Healthy	Strep. salivarius
ORS-AM09-16-104	1995278	39.915	Healthy	Strep. oralis
ORS-AM09-16-BH	2000713	39.9087	Healthy	Strep. oralis
ORS-AM09-16-O-104	2323461	39.5279	Healthy	Strep. salivarius
ORS-AM09-18-104	1750270	39.3661	Healthy	Strep. infantis
ORS-AM09-20-BH	2343304	39.3522	Healthy	Strep. salivarius
ORS-AM09-21-O-104	2118672	39.6595	Healthy	Strep. salivarius
ORS-AM09-22-104	1949915	39.8356	Healthy	Strep. mitis
ORS-AM09-23-O-104	2010087	42.0717	Healthy	Strep. parasanguinis
ORS-AM09-27-BH	2415077	43.2543	Healthy	Strep. sanguinis
ORS-AM09-27-O-104	1949625	41.3158	Healthy	Strep. oralis
ORS-AM09-4-O-104	1960424	41.3283	Healthy	Strep. oralis
ORS-AM09-5-104	2300562	39.1568	Healthy	Strep. mitis
ORS-AM09-7-O-104	2179448	40.612	Healthy	Strep. gordonii
ORS-AM09-8-O-104	2323642	39.5241	Healthy	Strep. salivarius
ORS-AM09-9-O-104	1961031	41.3269	Healthy	Strep. oralis
ORS-TM06-05	1909775	38.7896	Healthy	Strep. anginosus
ORS-TM06-06	2190896	40.4564	Healthy	Strep. gordonii
ORS-TM06-07	1893568	38.6605	Healthy	Strep. anginosus
ORS-TM06-111	1865196	38.7625	Healthy	Strep. anginosus
ORS-TM06-112	2155169	41.7359	Healthy	Strep. parasanguinis
ORS-TM06-118	1867906	38.7489	Healthy	Strep. anginosus
ORS-TM06-219	2134246	41.9081	Healthy	Strep. parasanguinis
ORS-TM06-222	2092859	39.9961	Healthy	Strep. salivarius
ORS-TM06-24	2138977	39.914	Healthy	Strep. salivarius
ORS-TM06-27	2191972	40.4578	Healthy	Strep. gordonii
ORS-TM06-36	1894490	41.0585	Healthy	Strep. oralis
ORS-TM06-84	2142222	39.8372	Healthy	Strep. salivarius
ORS-TM07-19	2402528	42.991	Healthy	Strep. sanguinis
ORS-TM07-224	2195015	39.947	Healthy	Strep. salivarius
ORS-TM07-230	2141764	39.9121	Healthy	Strep. salivarius
ORS-TM07-240	1881410	41.087	Healthy	Strep. mitis
ORS-TM07-269	1878870	41.0779	Healthy	Strep. mitis
ORS-TM07-51	2198218	39.9543	Healthy	Strep. salivarius
ORS-TM07-61	2196484	39.9481	Healthy	Strep. salivarius
ORT-AF03-01	1951255	42.0314	Healthy	Strep. parasanguinis
ORT-AF03-08	2178182	41.874	Healthy	Strep. parasanguinis
ORT-AF03-129	2220353	41.5143	Healthy	Strep. parasanguinis
ORT-AF03-21	2293531	39.3957	Healthy	Strep. salivarius
ORT-AF03-214	1853699	39.4996	Healthy	Strep. infantis
ORT-AF04-01	2118180	39.7866	Healthy	Strep. salivarius
ORT-AF04-11	2119665	39.7944	Healthy	Strep. salivarius
ORT-AF04-117	2050257	41.9311	Healthy	Strep. parasanguinis
ORT-AF04-118	2041918	41.9988	Healthy	Strep. parasanguinis
ORT-AF04-121	2141963	39.7369	Healthy	Strep. salivarius
ORT-AF04-19	2345012	39.4184	Healthy	Strep. salivarius
ORT-AF04-193	2115449	39.7762	Healthy	Strep. salivarius
ORT-AF04-228	2368405	39.4712	Healthy	Strep. salivarius
ORT-AF04-23	2120003	39.7959	Healthy	Strep. salivarius
ORT-AF04-26	2138769	39.7848	Healthy	Strep. salivarius
ORT-AF04-29	2382495	39.4455	Healthy	Strep. salivarius
ORT-AF04-30	2080149	39.7229	Healthy	Strep. salivarius
ORT-AF06-36	1806182	39.2802	Healthy	Strep. infantis
ORT-AF08-11	1934328	41.3335	Healthy	Strep. oralis
ORT-AF08-12-O-MRS	2324304	39.5236	Healthy	Strep. salivarius
ORT-AF08-12	2038621	40.005	Healthy	Strep. salivarius
ORT-AF08-13	1940596	41.3509	Healthy	Strep. oralis
ORT-AF08-14-O-MRS	1942122	38.6559	Healthy	Strep. anginosus
ORT-AF08-15	2082627	39.7604	Healthy	Strep. salivarius
ORT-AF08-16	2014250	40.6371	Healthy	Strep. oralis
ORT-AF08-19	1902585	38.8176	Healthy	Strep. anginosus
ORT-AF08-2	1844542	39.0792	Healthy	Strep. anginosus
ORT-AF08-21-O-MRS	1964345	41.3227	Healthy	Strep. oralis
ORT-AF08-24-MRS	2101171	39.7814	Healthy	Strep. salivarius
ORT-AF08-28-MRS	1811708	38.0158	Healthy	Strep. constellatus
ORT-AF08-3	1701501	38.6675	Healthy	Strep. constellatus
ORT-AF08-32-MRS	1808873	38.0098	Healthy	Strep. constellatus
ORT-AF08-34-MRS	1961972	41.3278	Healthy	Strep. oralis
ORT-AF08-35-MRS	2006762	42.0734	Healthy	Strep. parasanguinis
ORT-AF08-4	1872010	41.2079	Healthy	Strep. oralis
ORT-AF08-6	2059793	39.7323	Healthy	Strep. salivarius
ORT-AF08-8	2063796	39.7534	Healthy	Strep. salivarius
ORT-AF08-9	2038539	39.8421	Healthy	Strep. salivarius
ORT-AF10-05-O-BH	2062301	39.8199	Healthy	Strep. mitis
ORT-AF10-08-O-BH	2175475	41.5983	Healthy	Strep. parasanguinis
ORT-AF10-10-O-BH	2131110	39.5891	Healthy	Strep. salivarius
ORT-AF10-14-O-BH	2018386	40.7049	Healthy	Strep. oralis
ORT-AF10-15-O-BH	1700805	39.3744	Healthy	Strep. infantis
ORT-AF10-20-O-BH	2171207	40.4252	Healthy	Strep. gordonii
ORT-AF10-26-O-BH	2149887	39.6181	Healthy	Strep. salivarius
ORT-AM01-05MB	1831500	38.0554	Healthy	Strep. constellatus
ORT-AM04-01	2220016	39.6971	Healthy	Strep. salivarius
ORT-AM04-53	2153114	39.9066	Healthy	Strep. salivarius
ORT-AM04-57	2155398	39.9108	Healthy	Strep. salivarius
ORT-AM04-65	2123415	39.8024	Healthy	Strep. salivarius
ORT-AM05-07	2099435	39.9195	Healthy	Strep. salivarius
ORT-AM05-102	1951888	41.0469	Healthy	Strep. mitis
ORT-AM05-104	1928194	41.0851	Healthy	Strep. mitis
ORT-AM05-106	2174053	39.864	Healthy	Strep. salivarius
ORT-AM05-108	2181641	39.8776	Healthy	Strep. salivarius
ORT-AM05-112	2198016	40.4592	Healthy	Strep. gordonii
ORT-AM05-13	1952746	41.0449	Healthy	Strep. mitis
ORT-AM05-281	1748263	38.9114	Healthy	Strep. mitis
ORT-AM05-287	1945829	41.0443	Healthy	Strep. mitis
ORT-AM05-291	2232982	39.6676	Healthy	Strep. salivarius
ORT-AM05-453	1828254	37.8854	Healthy	Strep. constellatus
ORT-AM05-500	1875426	41.2865	Healthy	Strep. mitis
ORT-AM05-507	2103332	39.9549	Healthy	Strep. salivarius
ORT-AM05-511	1827909	37.8551	Healthy	Strep. constellatus
ORT-AM05-512	1829077	37.8884	Healthy	Strep. constellatus
ORT-AM05-514	2088147	39.9554	Healthy	Strep. salivarius
ORT-AM05-515	2126469	39.9009	Healthy	Strep. salivarius
ORT-AM05-521	1871951	41.2991	Healthy	Strep. mitis
ORT-AM05-525	1876228	41.2959	Healthy	Strep. mitis
ORT-AM05-527	1873615	41.2979	Healthy	Strep. mitis
ORT-AM05-63	2220945	39.6807	Healthy	Strep. salivarius
ORT-AM05-89	1917799	40.9957	Healthy	Strep. oralis
ORT-AM08-194	2091669	39.9147	Healthy	Strep. salivarius
ORT-AM08-202	2083388	39.8971	Healthy	Strep. salivarius
ORT-AM08-425	1831616	38.7726	Healthy	Strep. anginosus
ORT-AM08-438	2132091	39.9632	Healthy	Strep. salivarius
ORT-AM08-450	1832120	38.7698	Healthy	Strep. anginosus
ORT-AM08-463	1832520	38.7731	Healthy	Strep. anginosus
ORT-AM09-10-104	1749503	39.363	Healthy	Strep. infantis
ORT-AM09-17-104	2142252	41.706	Healthy	Strep. parasanguinis
ORT-AM09-21-O-104	1906011	41.138	Healthy	Strep. oralis
ORT-AM09-22-O-104	1960247	41.326	Healthy	Strep. oralis
ORT-AM09-23-104	1704994	39.421	Healthy	Strep. infantis
ORT-AM09-24-O-104	1961927	41.3295	Healthy	Strep. oralis
ORT-AM09-5-O-104	2005154	42.0764	Healthy	Strep. parasanguinis
ORT-AM09-6-O-104	2028727	40.5702	Healthy	Strep. oralis
ORT-AM09-7-O-104	2373718	43.3624	Healthy	Strep. sanguinis
ORT-AM09-9-104	1947771	42.0878	Healthy	Strep. parasanguinis
ORT-TM06-175	2309224	39.9927	Healthy	Strep. salivarius
ORT-TM06-179	2137519	39.9303	Healthy	Strep. salivarius
ORT-TM06-181	2190151	40.4624	Healthy	Strep. gordonii
ORT-TM06-189	2288541	42.9264	Healthy	Strep. sanguinis
ORT-TM06-195	2193366	40.4608	Healthy	Strep. gordonii
ORT-TM06-203	2152098	41.8389	Healthy	Strep. parasanguinis
ORT-TM07-100	2197142	39.9495	Healthy	Strep. salivarius
ORT-TM07-112	2220147	39.948	Healthy	Strep. salivarius
ORT-TM07-207	2197432	39.9516	Healthy	Strep. salivarius
ORT-TM07-84	2141231	39.9523	Healthy	Strep. salivarius
ORT-TM07-93	2196161	39.9492	Healthy	Strep. salivarius
8691AN1	2028049	40.1258	Cancer	Strep. mitis
8514A8	2250528	41.4755	Cancer	Strep. parasanguinis
8524AN6	1942870	40.2094	Cancer	Strep. mitis
8543AN4	1859388	38.0227	Cancer	Strep. constellatus
8633AN2	1953079	39.0028	Cancer	Strep. anginosus
8607AN3	2167350	38.3608	Cancer	Strep. anginosus
8451DM9	1946573	40.2327	Cancer	Strep. mitis
8512AN4	1994571	38.8404	Cancer	Strep. anginosus
8543AN1	2021633	38.8535	Cancer	Strep. anginosus
8514A11	1861138	41.3561	Cancer	Strep. oralis
8451AT6	1804609	39.4682	Cancer	Strep. infantis
8513A10	2180474	40.3756	Cancer	Strep. gordonii
8421A4	2063219	41.8209	Cancer	Strep. parasanguinis
8451AG2	1707050	39.4984	Cancer	Strep. infantis
8543A7	2000294	40.1019	Cancer	Strep. mitis
8451AT7	2448944	42.7511	Cancer	Strep. sanguinis
8676A7	2192399	40.3643	Cancer	Strep. gordonii
8497AN4	1840036	40.339	Cancer	Strep. mitis
8457OAN4	2048590	39.4878	Cancer	Strep. infantis
8484A3	2050115	40.0758	Cancer	Strep. mitis
8515AN14	2278231	40.3596	Cancer	Strep. gordonii
8524A10	1916567	40.1147	Cancer	Strep. mitis
8512A6.2	2123739	41.9322	Cancer	Strep. parasanguinis
8524AN5	1968138	40.0143	Cancer	Strep. mitis
8324OAN8	2133804	42.0732	Cancer	Strep. parasanguinis
8515AN6	2437257	43.2566	Cancer	Strep. sanguinis
8512AN2	1940998	38.9618	Cancer	Strep. anginosus
8484A8	2049632	40.0637	Cancer	Strep. mitis
8691AN2	2177003	40.4611	Cancer	Strep. gordonii
8511A3	2221993	39.9014	Cancer	Strep. salivarius
8514A9	2342880	41.3158	Cancer	Strep. parasanguinis
8507K3	1961331	38.686	Cancer	Strep. anginosus
8451DM4	2104547	40.756	Cancer	Strep. oralis
8457OAN3	2034800	39.4477	Cancer	Strep. infantis
8513A12	1868056	38.0332	Cancer	Strep. constellatus
8389S2	2037386	40.9778	Cancer	Strep. oralis
8676AN5	1941094	40.2182	Cancer	Strep. mitis
8431AN1	2107185	39.876	Cancer	Strep. mitis
8451DM12	2232141	40.2751	Cancer	Strep. gordonii
8676A3	1927314	40.2591	Cancer	Strep. mitis
8485DM3	2242498	41.7306	Cancer	Strep. parasanguinis
8511AN11	1915637	38.5137	Cancer	Strep. anginosus
8498AN14.3	1835311	40.3439	Cancer	Strep. mitis
8497OA8	2070898	41.7328	Cancer	Strep. parasanguinis
8512A8	2014223	39.9019	Cancer	Strep. mitis
8451ANG2	2255362	40.3556	Cancer	Strep. gordonii
8498OA9	2014768	40.8091	Cancer	Strep. oralis
8513A9	1993432	40.1692	Cancer	Strep. mitis
8513AN9.2	1903393	38.0016	Cancer	Strep. constellatus
8451ANT4	1770353	39.5617	Cancer	Strep. infantis
8451AT5	1708086	39.5007	Cancer	Strep. infantis
8420OA2	2039588	41.0323	Cancer	Strep. oralis
8468OAN3	1740778	39.4761	Cancer	Strep. infantis
8524AN8	2038119	37.8956	Cancer	Strep. constellatus
8408OA3	2116670	41.7237	Cancer	Strep. parasanguinis
8355AN1	2059538	39.7056	Cancer	Strep. infantis
8511A8	2046718	41.1837	Cancer	Strep. oralis
8515A8	1995304	40.8402	Cancer	Strep. oralis
8457AT2	2156028	39.9333	Cancer	Strep. salivarius
8421OA3	2306578	39.8667	Cancer	Strep. salivarius
8511A7	2189599	41.7348	Cancer	Strep. parasanguinis
8513A4	1976636	40.9959	Cancer	Strep. oralis
8497OA7	2243860	39.6815	Cancer	Strep. salivarius
8355AN2	2147822	39.7229	Cancer	Strep. salivarius
8355A1	2235164	39.9198	Cancer	Strep. salivarius

## Sheet: genome_stats
Supplementary Table 2: Species-level genome size & GC content differences
Species	p_genome_size	p_GC_content	mean_cancer_size	mean_healthy_size	mean_cancer_gc	mean_healthy_gc	size_log2FC	gc_log2FC	size_signif	gc_signif
Strep. anginosus	0.0184239	0.817016	1.99351e+06	1.89251e+06	38.7456	38.7231	0.0750093	0.00083774	*
Strep. constellatus	0.116054	0.994044	1917239	1.82764e+06	37.9883	37.9886	0.0690491	-1.45735e-05
Strep. gordonii	0.0470602	0.00177419	2.21927e+06	2.17414e+06	40.3652	40.4881	0.0296407	-0.00438342	*	*
Strep. infantis	0.142016	0.00759673	1.85923e+06	1.76091e+06	39.5183	39.384	0.0783815	0.00490809		*
Strep. mitis	0.0844086	0.00834214	1.97072e+06	1.92176e+06	40.1364	40.5558	0.0363	-0.0149983		*
Strep. oralis	0.116588	0.348997	2.00951e+06	1.96392e+06	40.9939	41.0812	0.0331095	-0.0030695
Strep. parasanguinis	0.0178934	0.0284187	2.17043e+06	2.07517e+06	41.7266	41.9332	0.064747	-0.00712535	*	*
Strep. salivarius	0.22531	0.0908644	2.21857e+06	2.18374e+06	39.8376	39.7432	0.0228301	0.0034227
Strep. sanguinis	4.32723e-05	0.562638	2.4431e+06	2.35865e+06	43.0038	43.21	0.0507507	-0.00690137	*

## Sheet: core_accessory_stats
Supplementary Table 3: Statistical comparison of genomic features
Species	Taxonomic_Level	mean_Cancer	mean_Healthy	sd_Cancer	sd_Healthy	n_Cancer	n_Healthy	p_value	log2FC	significance
Strep. anginosus	Accessory	477.143	465.96	84.9753	49.7615	7	25	0.963608	0.0342152	ns
Strep. anginosus	Core	1419	1324	NA	NA	1	1	1	0.0999715	ns
Strep. constellatus	Accessory	305.75	342.045	97.2878	57.456	4	22	0.188069	-0.161836	ns
Strep. constellatus	Core	1491	1377	NA	NA	1	1	1	0.114752	ns
Strep. gordonii	Accessory	346.5	357.85	56.5146	28.2382	6	20	0.501455	-0.0464996	ns
Strep. gordonii	Core	1737	1674	NA	NA	1	1	1	0.0532982	ns
Strep. infantis	Accessory	450.5	359.5	112.913	41.5054	8	6	0.107892	0.325535	ns
Strep. infantis	Core	1277	1320	NA	NA	1	1	1	-0.0477794	ns
Strep. mitis	Accessory	545.267	675.364	66.8607	98.8145	15	33	1.22968e-05	-0.308703	***
Strep. mitis	Core	1288	1104	NA	NA	1	1	1	0.222392	ns
Strep. oralis	Accessory	557	651.033	72.1348	51.9188	8	61	3.66729e-05	-0.225053	***
Strep. oralis	Core	1316	1178	NA	NA	1	1	1	0.15982	ns
Strep. parasanguinis	Accessory	573.667	475.667	70.0964	38.671	9	24	0.000342291	0.270262	***
Strep. parasanguinis	Core	1435	1433	NA	NA	1	1	1	0.00201213	ns
Strep. salivarius	Accessory	408.667	764.55	46.9879	89.6814	6	109	4.00483e-05	-0.903687	***
Strep. salivarius	Core	1572	1151	NA	NA	1	1	1	0.449713	ns
Strep. sanguinis	Accessory	416.5	621.75	9.19239	36.0387	2	28	0.0221281	-0.578018	*
Strep. sanguinis	Core	1895	1602	NA	NA	1	1	1	0.242324	ns
Strep. vestibularis	Accessory	90.3333	6.5	28.6764	0.707107	3	2	0.2	3.79675	ns
Strep. vestibularis	Core	1790	1747	NA	NA	1	1	1	0.03508	ns
Strep. xiaochunlingii	Accessory	212	346.4	73.5391	37.5358	2	10	0.0409037	-0.708375	*
Strep. xiaochunlingii	Core	1643	1471	NA	NA	1	1	1	0.159535	ns

## Sheet: permanova_species
Supplemenatry Table 4: Permanova analysis
Species	R2	P_value
Strep. anginosus	0.1177	0.001
Strep. constellatus	0.1741	0.001
Strep. cristatus	0.3155	0.129
Strep. gordonii	0.1258	0.002
Strep. infantis	0.1653	0.034
Strep. mitis	0.1675	0.001
Strep. oralis	0.0395	0.022
Strep. parasanguinis	0.0964	0.003
Strep. pseudopneumoniae	0.6341	0.333333
Strep. rubneri	0.3091	0.136
Strep. salivarius	0.0157	0.086
Strep. sanguinis	0.0441	0.216
Strep. sinensis	0.182	0.666667
Strep. sp001556435	0.9997	0.333333
Strep. sp013394695	0.3327	0.4
Strep. vestibularis	0.9087	0.1
Strep. xiaochunlingii	0.1029	0.267
