# Supplementary material for: The Genomic Landscape of Head and Neck Cancer-associated Streptococci
Source: Research Square preprint supplement (doi:10.21203/rs.3.rs-8400357/v1), 2026-01-09
Supplement: Supplementary file 5 [file 8a40a54c8cb257a8f35909a6.xlsx]

## Sheet: Patient_list
Supplementary Table 1: Patients information
Research ID	Age (Yrs)	Sex	Smoking Status	Alcohol Consumption	Cancer Type	Cancer Stage	HPV +/-	Tumour Location	Treatment
8305	76	M	Nil	Nil	Other HNC (Non-SCC)	Nil	Nil	Salivary gland	Right parotidectomy + R modified radical neck dissection
8324	71	M	Yes	Yes	Salivary gland carcinoma	Stage IVa (T4a)	Nil	Right neck tumour	WLE RT SCC and RT Neck Dissection, RT Partial Parotidectomy, Anterior Lateral Thigh Free Flap Recons
8337	69	M	Yes	Yes	Oropharyngeal SCC	Stage III	P16 positive	Oropharynx	Left oropharygeectomy, palatopharyngoplasty, right tonsillectomy
8355	82 (patient passed in 2023)	M	No	Yes	HNC - unspecified site	Nil	Nil	Right neck tumour	R partial parotidectomy + right neck dissection + le
8389	75 (patient passed in 2023)	M	Yes	Nil	Sinonasal carcinoma	Nil	Nil	Sinonasal/nasopharynx	Open +/- endoscopic resection right sinonasal adenocarcinoma
8399	67	F	Yes	Yes	HNC - unspecified site	Stage I	Nil	Floor of mouth (FOM)	Wide local excision of anterior floor of mouth SCC BL neck dissection + regional falp reconstruction
8408	91	M	Nil	Nil	Laryngeal SCC	Nil	P16 positive	Larynx (unspecified subsite)	Nil
8420	70	M	Nil	Nil	Laryngeal SCC	Nil	Nil	Larynx (unspecified subsite)	Nil
8421	76	M	Yes	Yes	HNC - unspecified site	Stage IVa	Nil	Larynx (glottis)	Total larygectomy + primary closure + RT hemithyroidectomy + CP myotomy + BL neck dissection
8431	44	M	Yes	Yes	HNC - unspecified site	Stage II	Nil	Oral tongue	Right partial glossectomy + right neck dissection + tracheostomy + left radial forearm free flap and thigh skin graft
8451	82	M	Nil	Nil	Oral tongue SCC	Nil	Nil	Oral tongue	Nil
8457	79	M	Yes	Nil	Oropharyngeal SCC	Stage IVa (Recurrent)	Nil	Oropharynx	Pharyngectomy + reconstruction with ATL free flap or pectoralis major falp
8468	61	M	Nil	Nil	Buccal mucosa SCC	Nil	Nil	Nil	Nil
8484	67	M	Yes	Nil	Laryngeal SCC	Stage Ivb	Nil	Larynx (glottic/subglottic)	Total laryngectomy + bilateral neck dissections
8485	74	M	Nil	Nil	Laryngeal SCC	Stage IVa	P16 positive	Larynx (unspecified subsite)	Total pharyngolaryngectomy + ALT free flap (bilateral); tracheostomy + panendoscopy; microlaryngoscopy + biopsy subglottis + balloon dilation
8494	60	M	Yes	Yes	Oropharyngeal SCC	Nil	Nil	Oropharynx (tonsil)	Nil
8497	58 (patient passed in 2022)	M	Yes	Nil	Oropharyngeal SCC	Stage III	P16 positive	Oropharynx (tonsil)	radiologically inserted gastrostomy + righ neck dissection + pec major flap (right)
8498	54	M	Yes	Yes	Floor of mouth SCC	Stage II	Nil	Floor of mouth (FOM)	WLE Right FOM + Bilateral Neck Dissections
8507	61	F	Yes	Yes	Oral SCC (FOM + tongue)	Stage III	Nil	Floor of mouth (FOM)	partial glossectomy + bilateral neck dissection
8511	78 (patient passed in 2023)	F	Yes	No	Oral SCC (tongue + FOM)	Stage III	Nil	Oral tongue	left hemiglossectomy + neck dissection + RAFF
8512	60	M	Yes	Nil	Oropharyngeal SCC (Base of tongue)	Stage IVb	Nil	Oropharynx (base of tongue)	total glossectomy + bilateral neck dissection + anterolateral thigh free flap reconstruction
8513	50	M	Nil	Nil	Laryngeal SCC (Transglottic)	Stage III	Nil	Larynx (transglottic/subglottic)	Total laryngectomy + bilateral neck dissection + tracheoesophageal fistula
8514	77	M	Nil	Yes	Laryngeal SCC (Supraglottic)	Stage IVb	Nil	Larynx (supraglottic)	Total laryggectomy + partial pharyngectomy + bilateral neck dissections + right hemithyroidectomy + speaking valve insertoion + primary closure + panendoscopy
8515	83	M	No	No	Gingiva/Alveolar ridge SCC	Stage IVa	Nil	Alveolar ridge/mandible	L segmental mandibulectomy + ipsilateral neck dissection + tracheostomy + free flap + removal of teeth as required
8524	73	M	Yes	Yes	Oral tongue SCC	Stage IVa	Nil	Oral tongue	left hemiglossectomy + bilateral neck dissection + left radial forearm free flap +/- left ALT +/- split thickness skin graft
8543	61	M	Yes	Yes	Nasopharyngeal carcinoma	Nil	P16 positive	Oropharynx (tonsil)	Panendoscopy + TORS assessment + biopsy
8606	76	F	Nil	Nil	Floor of mouth SCC	Nil	Nil	Nil	Nil
8607	67	M	Yes	nil	Oropharyngeal SCC (Base of tongue)	Stage I	P16 positive	Oral tongue	Total glossolaryngectomy + bilateral neck dissection + tracheostomy + ALT free flap reconstruction
8633	61	M	Yes	Yes	Oral tongue SCC	Stage III	Nil	Oral tongue	L hemiglossectomy + L neck dissection + L RFFF + L thigh STSG + trachey
8676	63	F	Nil	nil	Buccal mucosa SCC	Stage III	Nil	Buccal mucosa	WLE RT Buccal mucosa/RT neck dissection + tracheostomy + LT RFFF + LT thigh STSG
8691	78	M	Nil	Yes	Oral tongue SCC	Stage II	Nil	Oral tongue	RT hemiglossectomy + RT neck dissection + tracheostomy + RFFF
