# Supplementary material for: The Genomic Landscape of Head and Neck Cancer-associated Streptococci
Source: Research Square preprint supplement (doi:10.21203/rs.3.rs-8400357/v1), 2026-01-09
Supplement: Supplementary file 6 [file 8dcf058a3ff70c24e4cb25b9.docx]

**Supplementary Data:**

**Supplementary Data S1. Patient clinical metadata**

Supplementary data shows patient-level demographic and clinical information for all 31 HNC patients included in the study. Variables include age, sex, tumour site, cancer stage, smoking status, alcohol consumption, HPV (p16) status, and treatment details where available.

**Contains:**

- **Table 1:** Patient clinical information

**Supplementary Data S2. Isolate metadata and sequencing quality metrics**
Supplementary data summarises isolate identification, sequencing status, sample source, and long-read quality metrics. Data include: (i) isolates detected by Nanopore sequencing but excluded from WGS assembly due to insufficient coverage; (ii) species-level relative abundance; (iii) Nanopore QC metrics; (iv) isolates included in long-read WGS; (v) source of each isolate (tumour vs oral); and (vi) genomic similarity (ANI/SNP/indel) used to identify unique, non-redundant isolates.

**Contains:**

- **Table 1:** Isolates identified using Nanopore sequencing but not retained for whole-genome assembly
- **Table 2:** Species-level relative abundance of isolates across samples
- **Table 3:** Nanopore sequencing quality control metrics
- **Table 4:** List of bacterial isolates subjected to Oxford Nanopore whole-genome sequencing
- **Table 5:** Source of isolation
- **Table 6:** ANI, indel and SNP-based genomic similarity analysis for identifying unique isolates

**Supplementary Data S3. Genomic and pangenome summary**
Supplementary data provides pangenome statistics and species-level genomic characteristics derived from dereplicated Streptococcus isolates. Metrics include core genes shared among unique isolates, pangenome size, genome size distributions, GC content, core gene fractions, and associated descriptive statistics.

**Contains:**

- **Table 1:** Core genes shared among unique Streptococcus isolates from HNC patients
- **Table 2:** Species-level genomic, core-genome and pangenome characteristics
- **Table 3:** Species-level core genome size, pangenome size and genomic fraction statistics
- **Table 4:** Core and accessory genes identified in Cluster 1
- **Table 5:** Core and accessory genes identified in Cluster 2
- **Table 6:** Core and accessory genes identified in Cluster 3
- **Table 7:** Core and accessory genes identified in Cluster 4
- **Table 8:** Core and accessory genes identified in Cluster 5
- **Table 9:** Core and accessory genes identified in Cluster 6
- **Table 10:** Core and accessory genes identified in Cluster 7

**Supplementary Data S4. CAZyme functional analysis of HNC isolates**
Supplementary data contains genome-wide annotation and functional summaries of CAZyme genes detected in Streptococcus isolates from HNC patients. Data include CAZyme counts in cancer-associated isolates, species-level CAZy distributions, per-isolate CAZy annotation, CAZy class patterns, functional diversity indices, and CAZy family enrichment statistics.

**Contains:**

- **Table 1:** CAZyme counts in cancer-associated isolates
- **Table 2:** CAZyme counts per species
- **Table 3:** CAZyme gene annotation per isolate
- **Table 4:** CAZyme class distribution across species
- **Table 5:** CAZyme functional diversity indices
- **Table 6:** CAZyme family enrichment analysis

**Supplementary Data S5. Gene enrichment and differential frequency analysis**
Supplementary data reports gene-level differences between tumour-derived and oral isolates. It includes Fisher’s exact test results, frequency shifts, gene enrichment directionality, tumour- and oral-specific genes, and detailed raw counts with associated p-values and adjusted p-values.

**Contains:**

- **Table 1:** Fisher’s exact test gene enrichment
- **Table 2:** Gene frequency differences between tumour and oral isolates
- **Table 3:** Tumour-specific vs oral-specific genes
- **Table 4:** Full enrichment statistics with raw counts

**Supplementary Data S6. HGT analysis and genomic annotations**

Supplementary data characterises horizontal gene transfer (HGT) events across *Streptococcus* isolates, including functional annotation of HGT-associated genes, MGE-associated gene products, functional category distributions within ICE and prophage elements, and detailed genomic coordinates for each predicted HGT event.

**Contains:**

- **Table 1:** Transposases and mobile element–associated gene products by HGT category
- **Table 2:** Functional classification of HGT-associated genes
- **Table 3:** Mapping of HGT type (ICE, prophage) to functional categories
- **Table 4:** Detailed HGT event annotations and genomic coordinates

**Supplementary Data S7. Genome size and GC content analysis (cancer vs healthy isolates)**

Supplementary data presents isolate-level and species-level genome size and GC content comparisons between tumour-associated and healthy oral isolates. It includes descriptive summaries, statistical testing, log2 fold changes, and PERMANOVA results evaluating group-level differences.

**Contains:**

- **Table 1:** Per-isolate genome size and GC content
- **Table 2:** Species-level genome size and GC content differences
- **Table 3:** Statistical comparison of genomic features
- **Table 4:** PERMANOVA analysis

**Supplementary Data S8. CAZyme functional and differential analysis (cancer vs healthy isolates)**

Supplementary data compares CAZyme functional potential between cancer-associated and healthy oral isolates. It includes CAZy family-level abundance, gene annotations, species-level CAZy profiles, differential CAZyme feature analysis, Shannon diversity comparisons, Wilcoxon tests, and differential enrichment of CAZy families using a DESeq2-like framework.

**Contains:**

- **Table 1:** CAZyme family counts
- **Table 2:** CAZyme gene annotation per isolate
- **Table 3:** Species-level CAZy class abundance
- **Table 4:** Differential CAZyme features (cancer vs healthy)
- **Table 5:** Shannon diversity comparison
- **Table 6:** Wilcoxon species-level CAZyme differences
- **Table 7:** Differential CAZy family enrichment (DESeq2-like output)

**Supplementary Data S9. Functional enrichment and differential gene analysis (cancer vs healthy)**

Supplementary data contains functional enrichment outputs comparing tumour-derived and healthy isolates, including differential gene frequency analyses, KEGG/COG/functional category enrichment, GO term enrichment, and species-specific analyses for *Strep. gordonii*, *Strep. anginosus*, *Strep. parasanguinis*, *Strep. mitis*, and *Strep. salivarius*

**Contains:**

- **Table 1:** Differential gene frequency analysis with enrichment direction
- **Table 2:** Differential gene frequency analysis
- **Table 3:** Functional category enrichment (KEGG/COG/functional terms)
- **Table 4:** Gene Ontology enrichment analysis
- **Table 5:** *Streptococcus gordonii* gene-specific enrichment
- **Table 6:** *Streptococcus anginosus* gene-specific enrichment
- **Table 7:** *Streptococcus mitis* gene-specific enrichment
- **Table 8:** *Streptococcus parasanguinis* gene-specific enrichment
- **Table 9:** *Streptococcus salivarius* gene-specific enrichment

**Supplementary Figures**

**Supplementary Fig S1. Clustering of *Streptococcus* isolates based on gene presence/absence.** Elbow plot illustrating the within-cluster sum of squares (WSS) for different values of *k*. The inflection point at *k = 7* was used to determine the optimal number of clusters for UMAP partitioning.

**Supplementary Fig S2. Distribution of Core and Accessory Genes Across Species within UMAP Clusters of Streptococcus Isolates.**

Figure illustrates the distribution of core and accessory genes across *Streptococcus* species within each of the seven UMAP clusters in Figure 2A. Each panel corresponds to a specific UMAP cluster, with isolates grouped by species along the x-axis. Stacked bars represent the total gene count (y-axis) for each isolate, divided into two categories: Core Genes (bottom portion of each bar) indicates genes shared across most isolates in that cluster. Accessory Genes (top portion of each bar, light blue) representing genes unique to individual isolates.

**Supplementary Figure S3. Genomic characteristics of *Streptococcus* species with multiple isolates from HNC patients.**

(A) Diagnostic scatter plot showing the relationship between the number of isolates per species and the size of the species’ pangenome (total CDS) or core genome. Each point represents a species, with pangenome size (x-axis) and core genome size (y-axis) calculated from non-rarefied datasets.

(B) Summary of key genomic features for species with ≥2 isolates. Bars show mean values per species with error bars representing standard deviation. Metrics include average GC content (%), average genome size (bp), number of core genes, and total predicted coding sequences (CDS) per species (pangenome size).

**Supplementary Figure S4. Global sharing network and cluster size distributions of MGEs.**

**(A)** Global sharing network of integrative and conjugative elements (ICEs), plasmids, and prophages detected across 132 Streptococcus isolates. Each node represents an isolate, and edges indicate shared MGE clusters between isolates. The network shows that certain MGEs are present across multiple patients, reflecting widespread population-level prevalence rather than direct person-to-person transfer.

**(B)** Distribution of MGE cluster sizes (number of isolates per cluster) for ICEs, plasmids, and prophages. ICEs formed the largest clusters, with some spanning >40 isolates, while plasmids reached up to 26 isolates. In contrast, prophage clusters were generally restricted, rarely exceeding 4 isolates, consistent with their host-specific integration patterns.

**Supplementary Figure S5. Functional composition of mobile genetic elements (MGEs) stratified by patient and species.**

**(A)** Stacked bar plots showing within-patient functional composition of MGEs after excluding hypothetical and uncharacterised proteins. ICEs were dominated by transposase/IS elements and metabolic/transport functions, whereas prophages carried higher proportions of recombination and replication genes. Considerable heterogeneity was observed between patients, with some harbouring ICE-dominated mobilomes and others enriched in prophage-associated functions.

**(B)** Stacked bar plots showing species-level functional composition of MGEs, also excluding hypothetical and uncharacterised proteins. S. salivarius and S. vestibularis mobilomes were enriched for metabolic/transport functions, S. mitis and S. oralis carried a larger fraction of recombination and phage-related genes, and S. constellatus was enriched for phage functions. Rare taxa contained few MGEs, often dominated by transposase or recombination modules.

**Supplementary Fig. S6. Beta diversity of gene content across *Streptococcus* isolates.**

(**A**) Principal Coordinates Analysis (PCoA) based on Jaccard distances calculated from presence/absence of all genes across 467 isolates. Cancer and healthy isolates are shape-coded; *Streptococcus* species are colour-coded; ellipses indicate 95% confidence intervals. PERMANOVA revealed significant separation by source (*R²* = 0.029, *p* = 0.001).

(**B**) Species-stratified PCoA plots across 12 matched *Streptococcus* species. Each panel shows the distribution of isolates by source, with corresponding 95% confidence ellipses. PERMANOVA performed per species (see Supplementary Table S6), showing variable degrees of separation (*R²* range: 0.016–0.296).

**Supplementary Fig. S7. Comparative analysis of CAZyme composition and diversity between cancer and healthy *Streptococcus* isolates.**

(A) Stacked bar plots displaying the proportional composition of CAZy classes (GH, GT, CBM, CE, AA, PL) across shared species by cohort.

(B) Violin plots showing the number of unique CAZyme families per isolate across matched species from cancer and healthy cohorts. Statistical comparisons were performed using the Wilcoxon rank-sum test.

(C) Enrichment analysis based on Fisher’s exact test (FDR-corrected), identifying CAZy classes that differ between cohorts. Arrows indicate the direction of enrichment (cancer vs. healthy), with colour representing species identity and bar length indicating –log₁₀ adjusted *p*-values.

**Supplementary Fig. S8. Species-resolved gene enrichment differences between cancer-associated and healthy Streptococcus isolates.**

Faceted volcano plots display the frequency difference (Healthy – Cancer) and statistical significance (–log₁₀ FDR-adjusted p-value) of gene presence across five representative *Streptococcus* species with significant differential enrichment. Each point corresponds to a gene, coloured by the group in which it is more prevalent. Labels highlight selected genes with large effect sizes. Differential enrichment was assessed using Fisher’s exact test followed by Benjamini–Hochberg correction for multiple comparisons.

**Supplementary Fig. S9: Functional enrichment analysis of whole-genome gene content from *Streptococcus* isolates in cancer and healthy cohorts.**

(A–B) Gene Ontology (GO) enrichment analysis comparing *Streptococcus* isolates from HNC patients (A) and healthy cohort (B), based on the full gene repertoire. GO terms are grouped by ontology: molecular function (MF, green), cellular component (CC, red), and biological process (BP, blue). Enrichment is quantified by fold enrichment relative to the total genome background.

(C–D) KEGG pathway enrichment of whole-genome gene content for cancer (C) and healthy (D) isolates. Bars indicate the significance of pathway enrichment, represented as –log₁₀ (p-value). Enriched pathways include metabolic, biosynthetic, and signalling functions, with distinct patterns observed between the two cohorts.
