# Supplementary material for: The Genomic Landscape of Head and Neck Cancer-associated Streptococci
Source: Research Square preprint supplement (doi:10.21203/rs.3.rs-8400357/v1), 2026-01-09
Supplement: Supplementary file 7 [file 9d9a80d6d5f0b24503123ec6.xlsx]

## Sheet: Family_cancer_count
Supplementary Table 1: Cazyme counts in cancer
Unique_Family	Counts	Source
GH (Glycoside Hydrolases): 55 families	55	Cancer
GT (GlycosylTransferases): 21 families	21	Cancer
CBM (Carbohydrate-Binding Modules): 14 families	14	Cancer
CE (Carbohydrate Esterases): 6 families	6	Cancer
PL (Polysaccharide Lyases): 2 families	2	Cancer
AA (Auxiliary Activities): 1 family	1	Cancer

## Sheet: CAZyme_Class_Cancer
Supplementary Table 2: CAZyme counts per species
Species	CAZyme_Type	Min_Count	Max_Count	Mean_Count
Strep. anginosus	CBM	5	6	5.71429
Strep. anginosus	CE	5	7	6
Strep. anginosus	GH	20	25	21.4286
Strep. anginosus	GT	15	21	18.5714
Strep. anginosus	PL	0	2	0.285714
Strep. caecimuris	CBM	4	4	4
Strep. caecimuris	CE	8	8	8
Strep. caecimuris	GH	33	33	33
Strep. caecimuris	GT	25	25	25
Strep. caecimuris	PL	0	0	0
Strep. constellatus	CBM	3	4	3.25
Strep. constellatus	CE	5	5	5
Strep. constellatus	GH	17	20	18
Strep. constellatus	GT	18	19	18.5
Strep. constellatus	PL	2	2	2
Strep. cristatus	CBM	6	6	6
Strep. cristatus	CE	7	7	7
Strep. cristatus	GH	26	26	26
Strep. cristatus	GT	22	22	22
Strep. cristatus	PL	0	0	0
Strep. gordonii	CBM	7	7	7
Strep. gordonii	CE	6	6	6
Strep. gordonii	GH	30	32	31.1667
Strep. gordonii	GT	21	23	22.5
Strep. gordonii	PL	0	0	0
Strep. hominis	CBM	6	9	6.66667
Strep. hominis	CE	6	8	6.5
Strep. hominis	GH	20	28	22.6667
Strep. hominis	GT	16	20	18.3333
Strep. hominis	PL	0	0	0
Strep. infantis	CBM	4	11	7.75
Strep. infantis	CE	6	7	6.125
Strep. infantis	GH	21	31	26.375
Strep. infantis	GT	16	29	21.125
Strep. infantis	PL	0	0	0
Strep. massiliensis	CBM	2	2	2
Strep. massiliensis	CE	6	6	6
Strep. massiliensis	GH	21	21	21
Strep. massiliensis	GT	16	16	16
Strep. massiliensis	PL	0	0	0
Strep. mitis	CBM	5	9	7.4
Strep. mitis	CE	5	7	6
Strep. mitis	GH	25	32	28.3333
Strep. mitis	GT	18	33	24.8667
Strep. mitis	PL	0	0	0
Strep. mutans	CBM	2	2	2
Strep. mutans	CE	10	10	10
Strep. mutans	GH	23	23	23
Strep. mutans	GT	17	17	17
Strep. mutans	PL	0	0	0
Strep. oralis	CBM	6	10	8.625
Strep. oralis	CE	6	9	6.75
Strep. oralis	GH	31	36	34.75
Strep. oralis	GT	15	19	16.75
Strep. oralis	PL	0	2	0.5
Strep. parasanguinis	CBM	4	8	5.11111
Strep. parasanguinis	CE	8	9	8.22222
Strep. parasanguinis	GH	24	39	31.7778
Strep. parasanguinis	GT	15	29	20.3333
Strep. parasanguinis	PL	0	0	0
Strep. pseudopneumoniae	CBM	9	9	9
Strep. pseudopneumoniae	CE	6	6	6
Strep. pseudopneumoniae	GH	22	22	22
Strep. pseudopneumoniae	GT	29	29	29
Strep. pseudopneumoniae	PL	0	0	0
Strep. rubneri	CBM	8	8	8
Strep. rubneri	CE	7	7	7
Strep. rubneri	GH	34	34	34
Strep. rubneri	GT	27	27	27
Strep. rubneri	PL	0	0	0
Strep. salivarius	CBM	5	5	5
Strep. salivarius	CE	7	7	7
Strep. salivarius	GH	29	31	30.5
Strep. salivarius	GT	26	32	29.5
Strep. salivarius	PL	0	0	0
Strep. sanguinis	CBM	7	7	7
Strep. sanguinis	CE	6	7	6.5
Strep. sanguinis	GH	26	28	27
Strep. sanguinis	GT	27	28	27.5
Strep. sanguinis	PL	0	0	0
Strep. sinensis	CBM	9	9	9
Strep. sinensis	CE	7	7	7
Strep. sinensis	GH	27	27	27
Strep. sinensis	GT	17	17	17
Strep. sinensis	PL	0	0	0
Strep. sp001556435	CBM	5	5	5
Strep. sp001556435	CE	7	7	7
Strep. sp001556435	GH	33	33	33
Strep. sp001556435	GT	28	28	28
Strep. sp001556435	PL	0	0	0
Strep. sp001813105	CBM	4	4	4
Strep. sp001813105	CE	8	8	8
Strep. sp001813105	GH	35	35	35
Strep. sp001813105	GT	25	25	25
Strep. sp001813105	PL	0	0	0
Strep. sp002238115	CBM	9	9	9
Strep. sp002238115	CE	6	6	6
Strep. sp002238115	GH	28	28	28
Strep. sp002238115	GT	26	26	26
Strep. sp002238115	PL	0	0	0
Strep. sp013394695	CBM	9	9	9
Strep. sp013394695	CE	6	6	6
Strep. sp013394695	GH	28	28	28
Strep. sp013394695	GT	18	18	18
Strep. sp013394695	PL	0	0	0
Strep. sp029691405	CBM	8	8	8
Strep. sp029691405	CE	6	6	6
Strep. sp029691405	GH	32	32	32
Strep. sp029691405	GT	18	18	18
Strep. sp029691405	PL	2	2	2
Strep. sp901875575	CBM	5	5	5
Strep. sp901875575	CE	6	6	6
Strep. sp901875575	GH	13	13	13
Strep. sp901875575	GT	20	20	20
Strep. sp901875575	PL	0	0	0
Strep. vestibularis	CBM	2	2	2
Strep. vestibularis	CE	6	6	6
Strep. vestibularis	GH	17	17	17
Strep. vestibularis	GT	22	23	22.6667
Strep. vestibularis	PL	0	0	0
Strep. xiaochunlingii	CBM	3	3	3
Strep. xiaochunlingii	CE	7	7	7
Strep. xiaochunlingii	GH	27	29	28
Strep. xiaochunlingii	GT	20	21	20.5
Strep. xiaochunlingii	PL	0	0	0
Strep.BHI_1	CBM	9	9	9
Strep.BHI_1	CE	6	6	6
Strep.BHI_1	GH	30	30	30
Strep.BHI_1	GT	18	18	18
Strep.BHI_1	PL	0	0	0
Strep.BHI_10	CBM	10	10	10
Strep.BHI_10	CE	6	6	6
Strep.BHI_10	GH	35	35	35
Strep.BHI_10	GT	15	15	15
Strep.BHI_10	PL	0	0	0
Strep.BHI_11	CBM	6	6	6
Strep.BHI_11	CE	6	6	6
Strep.BHI_11	GH	25	25	25
Strep.BHI_11	GT	23	23	23
Strep.BHI_11	PL	1	1	1
Strep.BHI_2	CBM	9	9	9
Strep.BHI_2	CE	6	6	6
Strep.BHI_2	GH	25	25	25
Strep.BHI_2	GT	29	29	29
Strep.BHI_2	PL	0	0	0
Strep.BHI_3	CBM	9	9	9
Strep.BHI_3	CE	6	6	6
Strep.BHI_3	GH	28	28	28
Strep.BHI_3	GT	24	24	24
Strep.BHI_3	PL	0	0	0
Strep.BHI_4	CBM	8	8	8
Strep.BHI_4	CE	6	6	6
Strep.BHI_4	GH	34	34	34
Strep.BHI_4	GT	24	24	24
Strep.BHI_4	PL	0	0	0
Strep.BHI_5	CBM	6	6	6
Strep.BHI_5	CE	7	7	7
Strep.BHI_5	GH	27	27	27
Strep.BHI_5	GT	23	23	23
Strep.BHI_5	PL	0	0	0
Strep.BHI_6	CBM	7	7	7
Strep.BHI_6	CE	6	6	6
Strep.BHI_6	GH	30	30	30
Strep.BHI_6	GT	18	18	18
Strep.BHI_6	PL	0	0	0
Strep.BHI_7	CBM	9	9	9
Strep.BHI_7	CE	6	6	6
Strep.BHI_7	GH	30	30	30
Strep.BHI_7	GT	33	33	33
Strep.BHI_7	PL	0	0	0
Strep.BHI_8	CBM	8	9	8.5
Strep.BHI_8	CE	6	6	6
Strep.BHI_8	GH	28	30	29
Strep.BHI_8	GT	16	17	16.5
Strep.BHI_8	PL	0	0	0
Strep.BHI_9	CBM	9	9	9
Strep.BHI_9	CE	6	6	6
Strep.BHI_9	GH	29	29	29
Strep.BHI_9	GT	32	32	32
Strep.BHI_9	PL	0	0	0

## Sheet: cazy_family_cancer
Supplementary Table 3: CAZyme gene annotation per isolate
Gene.ID	CAZy.ID	isolate_id	CAZy_Class	CAZy_Family	Species
contig_1_18	CAN80640.1|GT47	8305AN4	GT	GT47	Strep.BHI_1
contig_1_38	CCO12102.2|GH13_31	8305AN4	GH	GH13_31	Strep.BHI_1
contig_1_41	QYU66396.1|GH13_23	8305AN4	GH	GH13_23	Strep.BHI_1
contig_1_48	QQQ35402.1|GH20	8305AN4	GH	GH20	Strep.BHI_1
contig_1_50	AYF96515.1|GH35	8305AN4	GH	GH35	Strep.BHI_1
contig_1_58	QQQ35412.1|GT0	8305AN4	GT	GT0	Strep.BHI_1
contig_1_60	QQQ35414.1|GT52	8305AN4	GT	GT52	Strep.BHI_1
contig_1_67	ALD67187.1|GT2	8305AN4	GT	GT2	Strep.BHI_1
contig_1_87	WAO96723.1|GH0	8305AN4	GH	GH0	Strep.BHI_1
contig_1_97	ALR08738.2|GT83	8305AN4	GT	GT83	Strep.BHI_1
contig_1_102	AGL62895.2|GH13	8305AN4	GH	GH13	Strep.BHI_1
contig_1_103	CCO11983.2|CBM50|CE4	8305AN4	CBM	CBM50	Strep.BHI_1
contig_1_103	CCO11983.2|CBM50|CE4	8305AN4	CE	CE4	Strep.BHI_1
contig_1_104	CBJ21436.1|GH77	8305AN4	GH	GH77	Strep.BHI_1
contig_1_105	QGS41569.1|GT35	8305AN4	GT	GT35	Strep.BHI_1
contig_1_109	QBZ11016.1|GT51	8305AN4	GT	GT51	Strep.BHI_1
contig_1_133	QQQ35480.1|GT51	8305AN4	GT	GT51	Strep.BHI_1
contig_1_144	CAI32748.2|GT4	8305AN4	GT	GT4	Strep.BHI_1
contig_1_156	VFH52001.1|CBM50	8305AN4	CBM	CBM50	Strep.BHI_1
contig_1_163	QQQ35511.1|CE9	8305AN4	CE	CE9	Strep.BHI_1
contig_1_258	ACA36590.1|GH31	8305AN4	GH	GH31	Strep.BHI_1
contig_1_264	AYF96287.1|GH29	8305AN4	GH	GH29	Strep.BHI_1
contig_1_274	AYF96278.1|GH95	8305AN4	GH	GH95	Strep.BHI_1
contig_1_288	AYF96260.1|CBM32|GH85	8305AN4	CBM	CBM32	Strep.BHI_1
contig_1_288	AYF96260.1|CBM32|GH85	8305AN4	GH	GH85	Strep.BHI_1
contig_1_319	ALD66962.1|GH3	8305AN4	GH	GH3	Strep.BHI_1
contig_1_324	AGL64345.2|GT2	8305AN4	GT	GT2	Strep.BHI_1
contig_1_335	CAG7911095.1|GH5_11	8305AN4	GH	GH5_11	Strep.BHI_1
contig_1_348	QYO62262.1|GH13	8305AN4	GH	GH13	Strep.BHI_1
contig_1_439	BDB08732.1|CE7	8305AN4	CE	CE7	Strep.BHI_1
contig_1_440	AYF96105.1|CBM40|GH33	8305AN4	CBM	CBM40	Strep.BHI_1
contig_1_440	AYF96105.1|CBM40|GH33	8305AN4	GH	GH33	Strep.BHI_1
contig_1_483	ALD68454.1|GT2	8305AN4	GT	GT2	Strep.BHI_1
contig_1_506	QBQ55251.1|CBM50	8305AN4	CBM	CBM50	Strep.BHI_1
contig_1_521	AYF96031.1|CBM71|GH2	8305AN4	CBM	CBM71	Strep.BHI_1
contig_1_521	AYF96031.1|CBM71|GH2	8305AN4	GH	GH2	Strep.BHI_1
contig_1_535	CCO11054.2|CBM50	8305AN4	CBM	CBM50	Strep.BHI_1
contig_1_552	QXF33454.1|GH13_3	8305AN4	GH	GH13_3	Strep.BHI_1
contig_1_577	QQQ35963.1|CBM71|GH2	8305AN4	CBM	CBM71	Strep.BHI_1
contig_1_577	QQQ35963.1|CBM71|GH2	8305AN4	GH	GH2	Strep.BHI_1
contig_1_616	QBZ13217.1|GH13_5	8305AN4	GH	GH13_5	Strep.BHI_1
contig_1_629	CCO09729.2|GH1	8305AN4	GH	GH1	Strep.BHI_1
contig_1_638	SQH54667.1|GT4	8305AN4	GT	GT4	Strep.BHI_1
contig_1_655	BBF72686.1|GT2	8305AN4	GT	GT2	Strep.BHI_1
contig_1_678	CCO12633.2|GH84	8305AN4	GH	GH84	Strep.BHI_1
contig_1_690	CAD7245033.1|GT58	8305AN4	GT	GT58	Strep.BHI_1
contig_1_711	CCO11632.2|GH3	8305AN4	GH	GH3	Strep.BHI_1
contig_1_718	CAE6204650.1|GH28	8305AN4	GH	GH28	Strep.BHI_1
contig_1_815	QCQ12506.1|GH23	8305AN4	GH	GH23	Strep.BHI_1
contig_1_817	ASN68240.1|GH73	8305AN4	GH	GH73	Strep.BHI_1
contig_1_828	CCO11994.2|GT4	8305AN4	GT	GT4	Strep.BHI_1
contig_1_833	BEI59196.1|GH130_1	8305AN4	GH	GH130_1	Strep.BHI_1
contig_1_838	QQQ34434.1|CBM41|CBM48|GH13_14	8305AN4	CBM	CBM41	Strep.BHI_1
contig_1_838	QQQ34434.1|CBM41|CBM48|GH13_14	8305AN4	CBM	CBM48	Strep.BHI_1
contig_1_838	QQQ34434.1|CBM41|CBM48|GH13_14	8305AN4	GH	GH13_14	Strep.BHI_1
contig_1_839	QGS42351.1|CBM48|GH13_9	8305AN4	CBM	CBM48	Strep.BHI_1
contig_1_839	QGS42351.1|CBM48|GH13_9	8305AN4	GH	GH13_9	Strep.BHI_1
contig_1_840	BBM21727.1|GH13_9	8305AN4	GH	GH13_9	Strep.BHI_1
contig_1_842	AYF95691.1|GT5	8305AN4	GT	GT5	Strep.BHI_1
contig_1_846	CCO12112.2|GH13_31	8305AN4	GH	GH13_31	Strep.BHI_1
contig_1_885	QKL34049.1|CBM34|GH13_20	8305AN4	CBM	CBM34	Strep.BHI_1
contig_1_885	QKL34049.1|CBM34|GH13_20	8305AN4	GH	GH13_20	Strep.BHI_1
contig_1_950	BDB09222.1|GH23	8305AN4	GH	GH23	Strep.BHI_1
contig_1_952	AMJ20543.1|GH13_11	8305AN4	GH	GH13_11	Strep.BHI_1
contig_1_956	AGL64700.2|GH23	8305AN4	GH	GH23	Strep.BHI_1
contig_1_1012	AYF95594.1|GT4	8305AN4	GT	GT4	Strep.BHI_1
contig_1_1013	ABJ55061.1|GT4	8305AN4	GT	GT4	Strep.BHI_1
contig_1_1024	QUI22575.1|CBM50	8305AN4	CBM	CBM50	Strep.BHI_1
contig_1_1054	AYF95550.1|GH73	8305AN4	GH	GH73	Strep.BHI_1
contig_1_1155	QGS42460.1|GH25	8305AN4	GH	GH25	Strep.BHI_1
contig_1_1239	AGL63871.2|GT2	8305AN4	GT	GT2	Strep.BHI_1
contig_1_1269	QBZ13768.1|CE4	8305AN4	CE	CE4	Strep.BHI_1
contig_1_1276	AGL63717.2|GT4	8305AN4	GT	GT4	Strep.BHI_1
contig_1_1291	CCO10293.2|CBM50	8305AN4	CBM	CBM50	Strep.BHI_1
contig_1_1304	ALD67832.1|GH1	8305AN4	GH	GH1	Strep.BHI_1
contig_1_1309	QBQ55156.1|CBM50	8305AN4	CBM	CBM50	Strep.BHI_1
contig_1_1332	AYF95294.1|GT28	8305AN4	GT	GT28	Strep.BHI_1
contig_1_1434	CAN65674.1|GH28	8305AN4	GH	GH28	Strep.BHI_1
contig_1_1462	CAD7252417.1|GH13	8305AN4	GH	GH13	Strep.BHI_1
contig_1_1476	AOG60880.1|GH32	8305AN4	GH	GH32	Strep.BHI_1
contig_1_1477	CBJ22856.1|GH32	8305AN4	GH	GH32	Strep.BHI_1
contig_1_1511	AGL63702.2|GT4	8305AN4	GT	GT4	Strep.BHI_1
contig_1_1554	CBA03971.1|GT30	8305AN4	GT	GT30	Strep.BHI_1
contig_1_1560	QKL33720.1|GT51	8305AN4	GT	GT51	Strep.BHI_1
contig_1_1561	QQQ35089.1|CBM32|GH20|GH84	8305AN4	CBM	CBM32	Strep.BHI_1
contig_1_1561	QQQ35089.1|CBM32|GH20|GH84	8305AN4	GH	GH20	Strep.BHI_1
contig_1_1561	QQQ35089.1|CBM32|GH20|GH84	8305AN4	GH	GH84	Strep.BHI_1
contig_1_1562	UWP38770.1|GH101	8305AN4	GH	GH101	Strep.BHI_1
contig_1_1564	QKL33724.1|GT113	8305AN4	GT	GT113	Strep.BHI_1
contig_1_1569	QTF54836.1|GT0	8305AN4	GT	GT0	Strep.BHI_1
contig_1_1570	QQQ35098.1|GT4	8305AN4	GT	GT4	Strep.BHI_1
contig_1_1571	QKL34069.1|GT26	8305AN4	GT	GT26	Strep.BHI_1
contig_1_1579	AMH89297.1|GH13_31	8305AN4	GH	GH13_31	Strep.BHI_1
contig_1_1582	AGL63717.2|GT4	8305AN4	GT	GT4	Strep.BHI_1
contig_1_1594	CAD7226128.1|GH38	8305AN4	GH	GH38	Strep.BHI_1
contig_1_1621	CCO12868.2|GH1	8305AN4	GH	GH1	Strep.BHI_1
contig_1_1624	AYF94996.1|CBM41|CBM48|GH13_12	8305AN4	CBM	CBM41	Strep.BHI_1
contig_1_1624	AYF94996.1|CBM41|CBM48|GH13_12	8305AN4	CBM	CBM48	Strep.BHI_1
contig_1_1624	AYF94996.1|CBM41|CBM48|GH13_12	8305AN4	GH	GH13_12	Strep.BHI_1
contig_1_1627	VFH63061.1|GH1	8305AN4	GH	GH1	Strep.BHI_1
contig_1_1628	AGL64353.2|CBM50|GH25	8305AN4	CBM	CBM50	Strep.BHI_1
contig_1_1628	AGL64353.2|CBM50|GH25	8305AN4	GH	GH25	Strep.BHI_1
contig_1_1636	CUS04921.2|GT4	8305AN4	GT	GT4	Strep.BHI_1
contig_1_1732	AXJ87581.1|CBM50	8305AN4	CBM	CBM50	Strep.BHI_1
contig_1_1737	ALD67354.1|GT2	8305AN4	GT	GT2	Strep.BHI_1
contig_1_1750	BDB10081.1|GH20	8305AN4	GH	GH20	Strep.BHI_1
contig_1_1752	AYF96638.1|GH38	8305AN4	GH	GH38	Strep.BHI_1
contig_1_1753	AQA07348.1|GH125	8305AN4	GH	GH125	Strep.BHI_1
contig_1_1754	QKL33948.1|GH92	8305AN4	GH	GH92	Strep.BHI_1
contig_1_1774	AGL63717.2|GT4	8305AN4	GT	GT4	Strep.BHI_1
contig_1_17	CAN80640.1|GT47	8305OA4	GT	GT47	Strep.BHI_2
contig_1_68	VED65856.1|GH25	8305OA4	GH	GH25	Strep.BHI_2
contig_1_73	UJD17971.1|GH25	8305OA4	GH	GH25	Strep.BHI_2
contig_1_107	CCO12102.2|GH13_31	8305OA4	GH	GH13_31	Strep.BHI_2
contig_1_112	QYU66396.1|GH13_23	8305OA4	GH	GH13_23	Strep.BHI_2
contig_1_121	BCJ09700.1|GH35	8305OA4	GH	GH35	Strep.BHI_2
contig_1_137	QBZ10976.1|GT2	8305OA4	GT	GT2	Strep.BHI_2
contig_1_165	AFV71678.1|GH13_29	8305OA4	GH	GH13_29	Strep.BHI_2
contig_1_170	WAO96723.1|GH0	8305OA4	GH	GH0	Strep.BHI_2
contig_1_183	ALR08738.2|GT83	8305OA4	GT	GT83	Strep.BHI_2
contig_1_188	AGL62895.2|GH13	8305OA4	GH	GH13	Strep.BHI_2
contig_1_189	CCO11983.2|CBM50|CE4	8305OA4	CBM	CBM50	Strep.BHI_2
contig_1_189	CCO11983.2|CBM50|CE4	8305OA4	CE	CE4	Strep.BHI_2
contig_1_190	ACA35518.1|GH77	8305OA4	GH	GH77	Strep.BHI_2
contig_1_191	VFH61242.1|GT35	8305OA4	GT	GT35	Strep.BHI_2
contig_1_197	AFC95669.1|GT51	8305OA4	GT	GT51	Strep.BHI_2
contig_1_203	CAI32748.2|GT4	8305OA4	GT	GT4	Strep.BHI_2
contig_1_219	BBP08966.1|CBM50	8305OA4	CBM	CBM50	Strep.BHI_2
contig_1_226	ALD67121.1|CE9	8305OA4	CE	CE9	Strep.BHI_2
contig_1_273	APJ31300.1|GT51	8305OA4	GT	GT51	Strep.BHI_2
contig_1_290	CAD7226128.1|GH38	8305OA4	GH	GH38	Strep.BHI_2
contig_1_426	AGL64345.2|GT2	8305OA4	GT	GT2	Strep.BHI_2
contig_1_435	CAG7911095.1|GH5_11	8305OA4	GH	GH5_11	Strep.BHI_2
contig_1_450	QYO62262.1|GH13	8305OA4	GH	GH13	Strep.BHI_2
contig_1_547	BDB08732.1|CE7	8305OA4	CE	CE7	Strep.BHI_2
contig_1_548	CBJ21850.1|CBM40|GH33	8305OA4	CBM	CBM40	Strep.BHI_2
contig_1_548	CBJ21850.1|CBM40|GH33	8305OA4	GH	GH33	Strep.BHI_2
contig_1_554	BBP09272.1|CBM40|GH33	8305OA4	CBM	CBM40	Strep.BHI_2
contig_1_554	BBP09272.1|CBM40|GH33	8305OA4	GH	GH33	Strep.BHI_2
contig_1_580	QGS41906.1|GH95	8305OA4	GH	GH95	Strep.BHI_2
contig_1_612	CAN65674.1|GH28	8305OA4	GH	GH28	Strep.BHI_2
contig_1_629	VFI09938.1|GT2	8305OA4	GT	GT2	Strep.BHI_2
contig_1_703	AMH88378.1|GH13_5	8305OA4	GH	GH13_5	Strep.BHI_2
contig_1_717	AGL63717.2|GT4	8305OA4	GT	GT4	Strep.BHI_2
contig_1_771	QUI22575.1|CBM50	8305OA4	CBM	CBM50	Strep.BHI_2
contig_1_782	QBZ11676.1|GT4	8305OA4	GT	GT4	Strep.BHI_2
contig_1_783	AEL10477.1|GT4	8305OA4	GT	GT4	Strep.BHI_2
contig_1_795	AMH88465.1|GH25	8305OA4	GH	GH25	Strep.BHI_2
contig_1_865	CCO11994.2|GT4	8305OA4	GT	GT4	Strep.BHI_2
contig_1_936	QCQ12506.1|GH23	8305OA4	GH	GH23	Strep.BHI_2
contig_1_943	UJD17971.1|GH25	8305OA4	GH	GH25	Strep.BHI_2
contig_1_967	AGL63871.2|GT2	8305OA4	GT	GT2	Strep.BHI_2
contig_1_981	CCO11632.2|GH3	8305OA4	GH	GH3	Strep.BHI_2
contig_1_988	CAE6204650.1|GH28	8305OA4	GH	GH28	Strep.BHI_2
contig_1_1000	BCJ10609.1|GH1	8305OA4	GH	GH1	Strep.BHI_2
contig_1_1045	QBZ13518.1|CBM34|GH13_20	8305OA4	CBM	CBM34	Strep.BHI_2
contig_1_1045	QBZ13518.1|CBM34|GH13_20	8305OA4	GH	GH13_20	Strep.BHI_2
contig_1_1051	ALD67860.1|CE4	8305OA4	CE	CE4	Strep.BHI_2
contig_1_1078	CCO12112.2|GH13_31	8305OA4	GH	GH13_31	Strep.BHI_2
contig_1_1083	AYF95691.1|GT5	8305OA4	GT	GT5	Strep.BHI_2
contig_1_1085	BBM21727.1|GH13_9	8305OA4	GH	GH13_9	Strep.BHI_2
contig_1_1086	BDB09340.1|CBM48|GH13_9	8305OA4	CBM	CBM48	Strep.BHI_2
contig_1_1086	BDB09340.1|CBM48|GH13_9	8305OA4	GH	GH13_9	Strep.BHI_2
contig_1_1088	CBJ22414.1|CBM41|CBM48|GH13_14	8305OA4	CBM	CBM41	Strep.BHI_2
contig_1_1088	CBJ22414.1|CBM41|CBM48|GH13_14	8305OA4	CBM	CBM48	Strep.BHI_2
contig_1_1088	CBJ22414.1|CBM41|CBM48|GH13_14	8305OA4	GH	GH13_14	Strep.BHI_2
contig_1_1093	BEI59196.1|GH130_1	8305OA4	GH	GH130_1	Strep.BHI_2
contig_1_1119	AMJ20543.1|GH13_11	8305OA4	GH	GH13_11	Strep.BHI_2
contig_1_1124	AGL64700.2|GH23	8305OA4	GH	GH23	Strep.BHI_2
contig_1_1209	CAD7245033.1|GT58	8305OA4	GT	GT58	Strep.BHI_2
contig_1_1222	BCT97347.1|CBM47	8305OA4	CBM	CBM47	Strep.BHI_2
contig_1_1242	AEL10282.1|CBM47	8305OA4	CBM	CBM47	Strep.BHI_2
contig_1_1243	AEL10282.1|CBM47	8305OA4	CBM	CBM47	Strep.BHI_2
contig_1_1261	CCO12633.2|GH84	8305OA4	GH	GH84	Strep.BHI_2
contig_1_1290	BBF72686.1|GT2	8305OA4	GT	GT2	Strep.BHI_2
contig_1_1313	BCJ10393.1|GT2	8305OA4	GT	GT2	Strep.BHI_2
contig_1_1314	QBZ13235.1|GT4	8305OA4	GT	GT4	Strep.BHI_2
contig_1_1320	CCO09729.2|GH1	8305OA4	GH	GH1	Strep.BHI_2
contig_1_1342	CCO10293.2|CBM50	8305OA4	CBM	CBM50	Strep.BHI_2
contig_1_1355	URK66701.1|GH1	8305OA4	GH	GH1	Strep.BHI_2
contig_1_1360	QBQ55156.1|CBM50	8305OA4	CBM	CBM50	Strep.BHI_2
contig_1_1371	AYF95294.1|GT28	8305OA4	GT	GT28	Strep.BHI_2
contig_1_1405	QXF33454.1|GH13_3	8305OA4	GH	GH13_3	Strep.BHI_2
contig_1_1423	CCO11054.2|CBM50	8305OA4	CBM	CBM50	Strep.BHI_2
contig_1_1441	QBQ55251.1|CBM50	8305OA4	CBM	CBM50	Strep.BHI_2
contig_1_1504	ANS88621.1|GH23	8305OA4	GH	GH23	Strep.BHI_2
contig_1_1505	AJW72812.1|GH23	8305OA4	GH	GH23	Strep.BHI_2
contig_1_1526	CAE6076421.1|GH27	8305OA4	GH	GH27	Strep.BHI_2
contig_1_1529	CAD7252417.1|GH13	8305OA4	GH	GH13	Strep.BHI_2
contig_1_1545	AGL62906.2|GH13_31	8305OA4	GH	GH13_31	Strep.BHI_2
contig_1_1546	CBJ22856.1|GH32	8305OA4	GH	GH32	Strep.BHI_2
contig_1_1578	BCJ11228.1|GT8	8305OA4	GT	GT8	Strep.BHI_2
contig_1_1579	AMH89203.1|GT4	8305OA4	GT	GT4	Strep.BHI_2
contig_1_1589	BCJ11240.1|GT2	8305OA4	GT	GT2	Strep.BHI_2
contig_1_1590	BCJ11241.1|GT101|GT8	8305OA4	GT	GT101	Strep.BHI_2
contig_1_1590	BCJ11241.1|GT101|GT8	8305OA4	GT	GT8	Strep.BHI_2
contig_1_1591	BCJ11242.1|GT101|GT8	8305OA4	GT	GT101	Strep.BHI_2
contig_1_1591	BCJ11242.1|GT101|GT8	8305OA4	GT	GT8	Strep.BHI_2
contig_1_1594	VFH74128.1|GT2	8305OA4	GT	GT2	Strep.BHI_2
contig_1_1595	VFH74130.1|GT8	8305OA4	GT	GT8	Strep.BHI_2
contig_1_1596	BCJ11249.1|GT2|GT8	8305OA4	GT	GT2	Strep.BHI_2
contig_1_1596	BCJ11249.1|GT2|GT8	8305OA4	GT	GT8	Strep.BHI_2
contig_1_1599	AGL63702.2|GT4	8305OA4	GT	GT4	Strep.BHI_2
contig_1_1642	CBA03971.1|GT30	8305OA4	GT	GT30	Strep.BHI_2
contig_1_1648	AMH89272.1|GT51	8305OA4	GT	GT51	Strep.BHI_2
contig_1_1650	BDZ42842.1|GT2	8305OA4	GT	GT2	Strep.BHI_2
contig_1_1655	QAY63367.1|GT2	8305OA4	GT	GT2	Strep.BHI_2
contig_1_1660	UGZ04862.1|GT0	8305OA4	GT	GT0	Strep.BHI_2
contig_1_1661	UGZ04839.1|GT2	8305OA4	GT	GT2	Strep.BHI_2
contig_1_1667	UGZ04834.1|GT4	8305OA4	GT	GT4	Strep.BHI_2
contig_1_1675	BCL40410.1|GH13_31	8305OA4	GH	GH13_31	Strep.BHI_2
contig_1_1678	AGL63717.2|GT4	8305OA4	GT	GT4	Strep.BHI_2
contig_1_1695	VFH38721.1|GH31	8305OA4	GH	GH31	Strep.BHI_2
contig_1_1715	CCO11681.2|GH25	8305OA4	GH	GH25	Strep.BHI_2
contig_1_1761	CCO12868.2|GH1	8305OA4	GH	GH1	Strep.BHI_2
contig_1_1765	BCJ09885.1|CBM41|CBM48|GH13_12	8305OA4	CBM	CBM41	Strep.BHI_2
contig_1_1765	BCJ09885.1|CBM41|CBM48|GH13_12	8305OA4	CBM	CBM48	Strep.BHI_2
contig_1_1765	BCJ09885.1|CBM41|CBM48|GH13_12	8305OA4	GH	GH13_12	Strep.BHI_2
contig_1_1766	BBP10455.1|CBM41|GH13_12	8305OA4	CBM	CBM41	Strep.BHI_2
contig_1_1766	BBP10455.1|CBM41|GH13_12	8305OA4	GH	GH13_12	Strep.BHI_2
contig_1_1769	BCJ09882.1|GH1	8305OA4	GH	GH1	Strep.BHI_2
contig_1_1770	AGL64353.2|CBM50|GH25	8305OA4	CBM	CBM50	Strep.BHI_2
contig_1_1770	AGL64353.2|CBM50|GH25	8305OA4	GH	GH25	Strep.BHI_2
contig_1_1782	CUS04921.2|GT4	8305OA4	GT	GT4	Strep.BHI_2
contig_1_1899	BCJ09747.1|CBM50	8305OA4	CBM	CBM50	Strep.BHI_2
contig_1_1904	ALD67354.1|GT2	8305OA4	GT	GT2	Strep.BHI_2
contig_1_1915	BDB10081.1|GH20	8305OA4	GH	GH20	Strep.BHI_2
contig_1_1917	AYF96638.1|GH38	8305OA4	GH	GH38	Strep.BHI_2
contig_1_1918	CBJ23235.1|GH125	8305OA4	GH	GH125	Strep.BHI_2
contig_1_1919	AEL11607.1|GH92	8305OA4	GH	GH92	Strep.BHI_2
contig_1_1925	BCJ11501.1|GH29	8305OA4	GH	GH29	Strep.BHI_2
contig_1_1926	QBZ12533.1|CBM71|GH2	8305OA4	CBM	CBM71	Strep.BHI_2
contig_1_1926	QBZ12533.1|CBM71|GH2	8305OA4	GH	GH2	Strep.BHI_2
contig_1_1950	AGL63717.2|GT4	8305OA4	GT	GT4	Strep.BHI_2
contig_1_15	CAN80640.1|GT47	8324OA8	GT	GT47	Strep.BHI_3
contig_1_45	CCO12102.2|GH13_31	8324OA8	GH	GH13_31	Strep.BHI_3
contig_1_47	QYU66396.1|GH13_23	8324OA8	GH	GH13_23	Strep.BHI_3
contig_1_58	AMD96210.1|GH20	8324OA8	GH	GH20	Strep.BHI_3
contig_1_60	AMD96212.1|GH35	8324OA8	GH	GH35	Strep.BHI_3
contig_1_101	ALR08738.2|GT83	8324OA8	GT	GT83	Strep.BHI_3
contig_1_106	AGL62895.2|GH13	8324OA8	GH	GH13	Strep.BHI_3
contig_1_107	CCO11983.2|CBM50|CE4	8324OA8	CBM	CBM50	Strep.BHI_3
contig_1_107	CCO11983.2|CBM50|CE4	8324OA8	CE	CE4	Strep.BHI_3
contig_1_108	AMD96265.1|GH77	8324OA8	GH	GH77	Strep.BHI_3
contig_1_109	AMD96266.1|GT35	8324OA8	GT	GT35	Strep.BHI_3
contig_1_176	CAG7911095.1|GH5_11	8324OA8	GH	GH5_11	Strep.BHI_3
contig_1_184	AGL64353.2|CBM50|GH25	8324OA8	CBM	CBM50	Strep.BHI_3
contig_1_184	AGL64353.2|CBM50|GH25	8324OA8	GH	GH25	Strep.BHI_3
contig_1_185	AMD96326.1|GH1	8324OA8	GH	GH1	Strep.BHI_3
contig_1_191	AMD97937.1|GT51	8324OA8	GT	GT51	Strep.BHI_3
contig_1_192	CAI32748.2|GT4	8324OA8	GT	GT4	Strep.BHI_3
contig_1_196	CCO09992.2|GH32	8324OA8	GH	GH32	Strep.BHI_3
contig_1_199	CUS04921.2|GT4	8324OA8	GT	GT4	Strep.BHI_3
contig_1_216	AMD96369.1|CBM50	8324OA8	CBM	CBM50	Strep.BHI_3
contig_1_225	WAO96723.1|GH0	8324OA8	GH	GH0	Strep.BHI_3
contig_1_269	AGL63717.2|GT4	8324OA8	GT	GT4	Strep.BHI_3
contig_1_285	URK67267.1|GH73	8324OA8	GH	GH73	Strep.BHI_3
contig_1_319	CAD7226128.1|GH38	8324OA8	GH	GH38	Strep.BHI_3
contig_1_367	AMH89601.1|GH95	8324OA8	GH	GH95	Strep.BHI_3
contig_1_381	AMD96468.1|CBM32|GH85	8324OA8	CBM	CBM32	Strep.BHI_3
contig_1_381	AMD96468.1|CBM32|GH85	8324OA8	GH	GH85	Strep.BHI_3
contig_1_414	AGL64020.2|AA10	8324OA8	AA	AA10	Strep.BHI_3
contig_1_464	ALR09732.2|GH92	8324OA8	GH	GH92	Strep.BHI_3
contig_1_474	AMD97553.1|GH32	8324OA8	GH	GH32	Strep.BHI_3
contig_1_475	AGL62906.2|GH13_31	8324OA8	GH	GH13_31	Strep.BHI_3
contig_1_480	AMD97547.1|GT2	8324OA8	GT	GT2	Strep.BHI_3
contig_1_481	QBQ55251.1|CBM50	8324OA8	CBM	CBM50	Strep.BHI_3
contig_1_517	AMD97517.1|CBM34|GH13_20	8324OA8	CBM	CBM34	Strep.BHI_3
contig_1_517	AMD97517.1|CBM34|GH13_20	8324OA8	GH	GH13_20	Strep.BHI_3
contig_1_519	AMD97515.1|CBM71|GH2	8324OA8	CBM	CBM71	Strep.BHI_3
contig_1_519	AMD97515.1|CBM71|GH2	8324OA8	GH	GH2	Strep.BHI_3
contig_1_524	AMD97511.1|GT28	8324OA8	GT	GT28	Strep.BHI_3
contig_1_535	QBQ55156.1|CBM50	8324OA8	CBM	CBM50	Strep.BHI_3
contig_1_552	CCO10293.2|CBM50	8324OA8	CBM	CBM50	Strep.BHI_3
contig_1_565	CCO11054.2|CBM50	8324OA8	CBM	CBM50	Strep.BHI_3
contig_1_580	QXF33454.1|GH13_3	8324OA8	GH	GH13_3	Strep.BHI_3
contig_1_641	AJG25477.1|GT2	8324OA8	GT	GT2	Strep.BHI_3
contig_1_643	ASL34277.1|GT113	8324OA8	GT	GT113	Strep.BHI_3
contig_1_644	AYB02282.1|GT101|GT2	8324OA8	GT	GT101	Strep.BHI_3
contig_1_644	AYB02282.1|GT101|GT2	8324OA8	GT	GT2	Strep.BHI_3
contig_1_660	AGL63871.2|GT2	8324OA8	GT	GT2	Strep.BHI_3
contig_1_661	CBJ22778.1|CBM32|GH101	8324OA8	CBM	CBM32	Strep.BHI_3
contig_1_661	CBJ22778.1|CBM32|GH101	8324OA8	GH	GH101	Strep.BHI_3
contig_1_662	AMD97395.1|CBM32|GH20|GH84	8324OA8	CBM	CBM32	Strep.BHI_3
contig_1_662	AMD97395.1|CBM32|GH20|GH84	8324OA8	GH	GH20	Strep.BHI_3
contig_1_662	AMD97395.1|CBM32|GH20|GH84	8324OA8	GH	GH84	Strep.BHI_3
contig_1_693	CCO12633.2|GH84	8324OA8	GH	GH84	Strep.BHI_3
contig_1_791	CAD7245033.1|GT58	8324OA8	GT	GT58	Strep.BHI_3
contig_1_839	BCT97347.1|CBM47	8324OA8	CBM	CBM47	Strep.BHI_3
contig_1_847	AMD97194.1|CBM41|CBM48|GH13_14	8324OA8	CBM	CBM41	Strep.BHI_3
contig_1_847	AMD97194.1|CBM41|CBM48|GH13_14	8324OA8	CBM	CBM48	Strep.BHI_3
contig_1_847	AMD97194.1|CBM41|CBM48|GH13_14	8324OA8	GH	GH13_14	Strep.BHI_3
contig_1_848	AMD97192.1|CBM48|GH13_9	8324OA8	CBM	CBM48	Strep.BHI_3
contig_1_848	AMD97192.1|CBM48|GH13_9	8324OA8	GH	GH13_9	Strep.BHI_3
contig_1_849	BBM21727.1|GH13_9	8324OA8	GH	GH13_9	Strep.BHI_3
contig_1_851	AMD97189.1|GT5	8324OA8	GT	GT5	Strep.BHI_3
contig_1_855	CCO12112.2|GH13_31	8324OA8	GH	GH13_31	Strep.BHI_3
contig_1_856	CCO11632.2|GH3	8324OA8	GH	GH3	Strep.BHI_3
contig_1_863	CAE6204650.1|GH28	8324OA8	GH	GH28	Strep.BHI_3
contig_1_876	SQH65739.1|GH1	8324OA8	GH	GH1	Strep.BHI_3
contig_1_888	AGL64700.2|GH23	8324OA8	GH	GH23	Strep.BHI_3
contig_1_892	AMJ20543.1|GH13_11	8324OA8	GH	GH13_11	Strep.BHI_3
contig_1_894	QLF55610.1|GH23	8324OA8	GH	GH23	Strep.BHI_3
contig_1_990	AMD97043.1|GH73	8324OA8	GH	GH73	Strep.BHI_3
contig_1_1010	AMD97025.1|GH25	8324OA8	GH	GH25	Strep.BHI_3
contig_1_1060	BEI59196.1|GH130_1	8324OA8	GH	GH130_1	Strep.BHI_3
contig_1_1068	CCO11994.2|GT4	8324OA8	GT	GT4	Strep.BHI_3
contig_1_1075	AMD96970.1|GT4	8324OA8	GT	GT4	Strep.BHI_3
contig_1_1076	AMD97964.1|GT4	8324OA8	GT	GT4	Strep.BHI_3
contig_1_1089	QUI22575.1|CBM50	8324OA8	CBM	CBM50	Strep.BHI_3
contig_1_1143	BBF72686.1|GT2	8324OA8	GT	GT2	Strep.BHI_3
contig_1_1153	ANS88621.1|GH23	8324OA8	GH	GH23	Strep.BHI_3
contig_1_1154	AJW72812.1|GH23	8324OA8	GH	GH23	Strep.BHI_3
contig_1_1217	AMD97956.1|GT2	8324OA8	GT	GT2	Strep.BHI_3
contig_1_1226	AWZ17133.1|GH13_30	8324OA8	GH	GH13_30	Strep.BHI_3
contig_1_1233	AMD96783.1|CE4	8324OA8	CE	CE4	Strep.BHI_3
contig_1_1245	AMD96776.1|CBM71|GH2	8324OA8	CBM	CBM71	Strep.BHI_3
contig_1_1245	AMD96776.1|CBM71|GH2	8324OA8	GH	GH2	Strep.BHI_3
contig_1_1251	AGL63717.2|GT4	8324OA8	GT	GT4	Strep.BHI_3
contig_1_1265	CAN65674.1|GH28	8324OA8	GH	GH28	Strep.BHI_3
contig_1_1276	BBP09313.1|GT8	8324OA8	GT	GT8	Strep.BHI_3
contig_1_1277	AFJ26867.1|GT4|2.4.1.-	8324OA8	GT	GT4	Strep.BHI_3
contig_1_1284	BBP09305.1|GT2	8324OA8	GT	GT2	Strep.BHI_3
contig_1_1285	BBP09304.1|GT101|GT2	8324OA8	GT	GT101	Strep.BHI_3
contig_1_1285	BBP09304.1|GT101|GT2	8324OA8	GT	GT2	Strep.BHI_3
contig_1_1286	BBP09303.1|GT113	8324OA8	GT	GT113	Strep.BHI_3
contig_1_1287	ACF35266.1|GT2	8324OA8	GT	GT2	Strep.BHI_3
contig_1_1303	CAD7252417.1|GH13	8324OA8	GH	GH13	Strep.BHI_3
contig_1_1317	QQQ36042.1|GT2	8324OA8	GT	GT2	Strep.BHI_3
contig_1_1322	CCO09729.2|GH1	8324OA8	GH	GH1	Strep.BHI_3
contig_1_1330	AMD96695.1|GH13_5	8324OA8	GH	GH13_5	Strep.BHI_3
contig_1_1379	CCO11681.2|GH25	8324OA8	GH	GH25	Strep.BHI_3
contig_1_1422	CBA03971.1|GT30	8324OA8	GT	GT30	Strep.BHI_3
contig_1_1428	AMD96601.1|GT51	8324OA8	GT	GT51	Strep.BHI_3
contig_1_1431	AGL63717.2|GT4	8324OA8	GT	GT4	Strep.BHI_3
contig_1_1461	AGL63702.2|GT4	8324OA8	GT	GT4	Strep.BHI_3
contig_1_1490	QYO62262.1|GH13	8324OA8	GH	GH13	Strep.BHI_3
contig_1_1512	AGL64345.2|GT2	8324OA8	GT	GT2	Strep.BHI_3
contig_1_1571	QAY63367.1|GT2	8324OA8	GT	GT2	Strep.BHI_3
contig_1_1574	UJD04287.1|GH13_31	8324OA8	GH	GH13_31	Strep.BHI_3
contig_1_1617	AMD97704.1|GH29	8324OA8	GH	GH29	Strep.BHI_3
contig_1_1626	AMD97713.1|CBM40|GH33	8324OA8	CBM	CBM40	Strep.BHI_3
contig_1_1626	AMD97713.1|CBM40|GH33	8324OA8	GH	GH33	Strep.BHI_3
contig_1_1628	AMH88604.1|CBM40|GH33	8324OA8	CBM	CBM40	Strep.BHI_3
contig_1_1628	AMH88604.1|CBM40|GH33	8324OA8	GH	GH33	Strep.BHI_3
contig_1_1629	QLF54988.1|CE7	8324OA8	CE	CE7	Strep.BHI_3
contig_1_1679	AMD97773.1|CE9	8324OA8	CE	CE9	Strep.BHI_3
contig_1_1704	CCO12868.2|GH1	8324OA8	GH	GH1	Strep.BHI_3
contig_1_1728	AGL63717.2|GT4	8324OA8	GT	GT4	Strep.BHI_3
contig_1_1739	UJD04551.1|GT1	8324OA8	GT	GT1	Strep.BHI_3
contig_1_1743	AMD97838.1|GT51	8324OA8	GT	GT51	Strep.BHI_3
contig_1_1814	AMD97906.1|GT2	8324OA8	GT	GT2	Strep.BHI_3
contig_1_1827	UJD03079.1|GH20	8324OA8	GH	GH20	Strep.BHI_3
contig_1_1829	AMD97922.1|GH38	8324OA8	GH	GH38	Strep.BHI_3
contig_1_1830	AMD96071.1|GH125	8324OA8	GH	GH125	Strep.BHI_3
contig_1_1831	AMD96072.1|GH92	8324OA8	GH	GH92	Strep.BHI_3
contig_1_51	AGL63702.2|GT4	8324OAN8	GT	GT4	Strep. parasanguinis
contig_1_132	BCP60207.1|CBM23|GH26	8324OAN8	CBM	CBM23	Strep. parasanguinis
contig_1_132	BCP60207.1|CBM23|GH26	8324OAN8	GH	GH26	Strep. parasanguinis
contig_1_134	QLB50460.1|GH1	8324OAN8	GH	GH1	Strep. parasanguinis
contig_1_135	QLB50460.1|GH1	8324OAN8	GH	GH1	Strep. parasanguinis
contig_1_136	QOG25753.1|CE7	8324OAN8	CE	CE7	Strep. parasanguinis
contig_1_141	BCP60213.1|GH36	8324OAN8	GH	GH36	Strep. parasanguinis
contig_1_148	CCO12633.2|GH84	8324OAN8	GH	GH84	Strep. parasanguinis
contig_1_170	CCO11632.2|GH3	8324OAN8	GH	GH3	Strep. parasanguinis
contig_1_172	AEH55108.1|GH32	8324OAN8	GH	GH32	Strep. parasanguinis
contig_1_177	AGL63717.2|GT4	8324OAN8	GT	GT4	Strep. parasanguinis
contig_1_179	AGL63717.2|GT4	8324OAN8	GT	GT4	Strep. parasanguinis
contig_1_193	QEW09291.1|GT28	8324OAN8	GT	GT28	Strep. parasanguinis
contig_1_247	CAG7911095.1|GH5_11	8324OAN8	GH	GH5_11	Strep. parasanguinis
contig_1_300	QEW09214.1|GT51	8324OAN8	GT	GT51	Strep. parasanguinis
contig_1_301	QWL82363.1|GT51	8324OAN8	GT	GT51	Strep. parasanguinis
contig_1_302	QEW09214.1|GT51	8324OAN8	GT	GT51	Strep. parasanguinis
contig_1_321	AWK41767.1|GH13_3	8324OAN8	GH	GH13_3	Strep. parasanguinis
contig_1_333	QEW09192.1|CE9	8324OAN8	CE	CE9	Strep. parasanguinis
contig_1_336	AGL64345.2|GT2	8324OAN8	GT	GT2	Strep. parasanguinis
contig_1_455	QEW08839.1|GH73	8324OAN8	GH	GH73	Strep. parasanguinis
contig_1_519	AEH56829.1|GH13_31	8324OAN8	GH	GH13_31	Strep. parasanguinis
contig_1_529	CAD7252417.1|GH13	8324OAN8	GH	GH13	Strep. parasanguinis
contig_1_578	AGL64353.2|CBM50|GH25	8324OAN8	CBM	CBM50	Strep. parasanguinis
contig_1_578	AGL64353.2|CBM50|GH25	8324OAN8	GH	GH25	Strep. parasanguinis
contig_1_586	AGL63717.2|GT4	8324OAN8	GT	GT4	Strep. parasanguinis
contig_1_608	AEH56762.1|GH1	8324OAN8	GH	GH1	Strep. parasanguinis
contig_1_609	AEH56762.1|GH1	8324OAN8	GH	GH1	Strep. parasanguinis
contig_1_628	CUS04921.2|GT4	8324OAN8	GT	GT4	Strep. parasanguinis
contig_1_675	QYO62262.1|GH13	8324OAN8	GH	GH13	Strep. parasanguinis
contig_1_696	ANS88621.1|GH23	8324OAN8	GH	GH23	Strep. parasanguinis
contig_1_697	AJW72812.1|GH23	8324OAN8	GH	GH23	Strep. parasanguinis
contig_1_746	CCO12868.2|GH1	8324OAN8	GH	GH1	Strep. parasanguinis
contig_1_749	QEW08942.1|GT51	8324OAN8	GT	GT51	Strep. parasanguinis
contig_1_769	QLF56297.1|GH20	8324OAN8	GH	GH20	Strep. parasanguinis
contig_1_772	AMP67633.1|GH38	8324OAN8	GH	GH38	Strep. parasanguinis
contig_1_773	QWL81974.1|GH38	8324OAN8	GH	GH38	Strep. parasanguinis
contig_1_774	QXW96985.1|GH125	8324OAN8	GH	GH125	Strep. parasanguinis
contig_1_777	QEW08923.1|GH92	8324OAN8	GH	GH92	Strep. parasanguinis
contig_1_834	AFJ25141.1|GH29	8324OAN8	GH	GH29	Strep. parasanguinis
contig_1_835	QWL81917.1|GH29	8324OAN8	GH	GH29	Strep. parasanguinis
contig_1_861	WAO96723.1|GH0	8324OAN8	GH	GH0	Strep. parasanguinis
contig_1_879	QWU85921.1|GH130	8324OAN8	GH	GH130	Strep. parasanguinis
contig_1_926	AEH56548.1|GH35	8324OAN8	GH	GH35	Strep. parasanguinis
contig_1_938	QYU66396.1|GH13_23	8324OAN8	GH	GH13_23	Strep. parasanguinis
contig_1_940	CCO12102.2|GH13_31	8324OAN8	GH	GH13_31	Strep. parasanguinis
contig_1_1046	ALR08738.2|GT83	8324OAN8	GT	GT83	Strep. parasanguinis
contig_1_1048	AFJ26990.1|CBM48|CBM68|GH13_14	8324OAN8	CBM	CBM48	Strep. parasanguinis
contig_1_1048	AFJ26990.1|CBM48|CBM68|GH13_14	8324OAN8	CBM	CBM68	Strep. parasanguinis
contig_1_1048	AFJ26990.1|CBM48|CBM68|GH13_14	8324OAN8	GH	GH13_14	Strep. parasanguinis
contig_1_1050	AFJ26990.1|CBM48|CBM68|GH13_14	8324OAN8	CBM	CBM48	Strep. parasanguinis
contig_1_1050	AFJ26990.1|CBM48|CBM68|GH13_14	8324OAN8	CBM	CBM68	Strep. parasanguinis
contig_1_1050	AFJ26990.1|CBM48|CBM68|GH13_14	8324OAN8	GH	GH13_14	Strep. parasanguinis
contig_1_1056	AGL62895.2|GH13	8324OAN8	GH	GH13	Strep. parasanguinis
contig_1_1057	CCO11983.2|CBM50|CE4	8324OAN8	CBM	CBM50	Strep. parasanguinis
contig_1_1057	CCO11983.2|CBM50|CE4	8324OAN8	CE	CE4	Strep. parasanguinis
contig_1_1058	AEH56449.1|GH77	8324OAN8	GH	GH77	Strep. parasanguinis
contig_1_1059	QWL83988.1|GH77	8324OAN8	GH	GH77	Strep. parasanguinis
contig_1_1060	QEW10586.1|GT35	8324OAN8	GT	GT35	Strep. parasanguinis
contig_1_1106	AMP67402.1|GT4	8324OAN8	GT	GT4	Strep. parasanguinis
contig_1_1107	QEW10551.1|GT4	8324OAN8	GT	GT4	Strep. parasanguinis
contig_1_1110	QEW10548.1|GT2	8324OAN8	GT	GT2	Strep. parasanguinis
contig_1_1116	QEW10543.1|GT113	8324OAN8	GT	GT113	Strep. parasanguinis
contig_1_1118	QKH69741.1|GH25	8324OAN8	GH	GH25	Strep. parasanguinis
contig_1_1123	QEW10539.1|GT51	8324OAN8	GT	GT51	Strep. parasanguinis
contig_1_1136	AEH56391.1|GH2	8324OAN8	GH	GH2	Strep. parasanguinis
contig_1_1137	QEW10528.1|CBM71|GH2	8324OAN8	CBM	CBM71	Strep. parasanguinis
contig_1_1137	QEW10528.1|CBM71|GH2	8324OAN8	GH	GH2	Strep. parasanguinis
contig_1_1139	QEW10527.1|GH29	8324OAN8	GH	GH29	Strep. parasanguinis
contig_1_1140	SQH67270.1|GH29	8324OAN8	GH	GH29	Strep. parasanguinis
contig_1_1141	QEW10527.1|GH29	8324OAN8	GH	GH29	Strep. parasanguinis
contig_1_1145	AGL63717.2|GT4	8324OAN8	GT	GT4	Strep. parasanguinis
contig_1_1189	CAI32748.2|GT4	8324OAN8	GT	GT4	Strep. parasanguinis
contig_1_1236	QEW10443.1|CBM32|GH85	8324OAN8	CBM	CBM32	Strep. parasanguinis
contig_1_1236	QEW10443.1|CBM32|GH85	8324OAN8	GH	GH85	Strep. parasanguinis
contig_1_1237	QWL83818.1|CBM32|GH85	8324OAN8	CBM	CBM32	Strep. parasanguinis
contig_1_1237	QWL83818.1|CBM32|GH85	8324OAN8	GH	GH85	Strep. parasanguinis
contig_1_1238	QEW10443.1|CBM32|GH85	8324OAN8	CBM	CBM32	Strep. parasanguinis
contig_1_1238	QEW10443.1|CBM32|GH85	8324OAN8	GH	GH85	Strep. parasanguinis
contig_1_1239	QEW10443.1|CBM32|GH85	8324OAN8	CBM	CBM32	Strep. parasanguinis
contig_1_1239	QEW10443.1|CBM32|GH85	8324OAN8	GH	GH85	Strep. parasanguinis
contig_1_1250	AOS70683.1|CBM50	8324OAN8	CBM	CBM50	Strep. parasanguinis
contig_1_1324	BBF72686.1|GT2	8324OAN8	GT	GT2	Strep. parasanguinis
contig_1_1347	QBQ55156.1|CBM50	8324OAN8	CBM	CBM50	Strep. parasanguinis
contig_1_1351	SQH67058.1|GH1	8324OAN8	GH	GH1	Strep. parasanguinis
contig_1_1352	QUB38659.1|GH1	8324OAN8	GH	GH1	Strep. parasanguinis
contig_1_1380	AGL64020.2|AA10	8324OAN8	AA	AA10	Strep. parasanguinis
contig_1_1398	AEH56192.1|GH31	8324OAN8	GH	GH31	Strep. parasanguinis
contig_1_1399	QEW10342.1|GH13_31	8324OAN8	GH	GH13_31	Strep. parasanguinis
contig_1_1428	BBD21966.1|GT2	8324OAN8	GT	GT2	Strep. parasanguinis
contig_1_1430	QEW10325.1|GT2	8324OAN8	GT	GT2	Strep. parasanguinis
contig_1_1465	AFJ26641.1|GH32	8324OAN8	GH	GH32	Strep. parasanguinis
contig_1_1467	AGL62906.2|GH13_31	8324OAN8	GH	GH13_31	Strep. parasanguinis
contig_1_1501	QEW10286.1|GT8	8324OAN8	GT	GT8	Strep. parasanguinis
contig_1_1502	QEW10285.1|GT2	8324OAN8	GT	GT2	Strep. parasanguinis
contig_1_1503	QEW10284.1|GT8	8324OAN8	GT	GT8	Strep. parasanguinis
contig_1_1505	QEW10283.1|GT4	8324OAN8	GT	GT4	Strep. parasanguinis
contig_1_1550	CBA03971.1|GT30	8324OAN8	GT	GT30	Strep. parasanguinis
contig_1_1610	QWL83524.1|GH13_29	8324OAN8	GH	GH13_29	Strep. parasanguinis
contig_1_1665	AGL63871.2|GT2	8324OAN8	GT	GT2	Strep. parasanguinis
contig_1_1702	QUB38418.1|GT4	8324OAN8	GT	GT4	Strep. parasanguinis
contig_1_1703	QWL83445.1|GT4	8324OAN8	GT	GT4	Strep. parasanguinis
contig_1_1767	QEW10094.1|GH25	8324OAN8	GH	GH25	Strep. parasanguinis
contig_1_1781	QBQ55251.1|CBM50	8324OAN8	CBM	CBM50	Strep. parasanguinis
contig_1_1808	CCO12112.2|GH13_31	8324OAN8	GH	GH13_31	Strep. parasanguinis
contig_1_1893	QAY63367.1|GT2	8324OAN8	GT	GT2	Strep. parasanguinis
contig_1_1928	QWL83263.1|GH36	8324OAN8	GH	GH36	Strep. parasanguinis
contig_1_1932	QEW09974.1|GH13_18	8324OAN8	GH	GH13_18	Strep. parasanguinis
contig_1_1934	AFJ26297.1|GH3	8324OAN8	GH	GH3	Strep. parasanguinis
contig_1_1937	AEH55774.1|GH3	8324OAN8	GH	GH3	Strep. parasanguinis
contig_1_1965	AEH55758.1|GH13_5	8324OAN8	GH	GH13_5	Strep. parasanguinis
contig_1_2019	AEH55718.1|GH1	8324OAN8	GH	GH1	Strep. parasanguinis
contig_1_2121	CAE6204650.1|GH28	8324OAN8	GH	GH28	Strep. parasanguinis
contig_1_2173	AFJ26130.1|GH73	8324OAN8	GH	GH73	Strep. parasanguinis
contig_1_2184	QEW09800.1|GH87	8324OAN8	GH	GH87	Strep. parasanguinis
contig_1_2226	QEW09772.1|CE7	8324OAN8	CE	CE7	Strep. parasanguinis
contig_1_2242	AFJ26032.1|GT1	8324OAN8	GT	GT1	Strep. parasanguinis
contig_1_2246	QEW09758.1|GH23	8324OAN8	GH	GH23	Strep. parasanguinis
contig_1_2249	AMJ20543.1|GH13_11	8324OAN8	GH	GH13_11	Strep. parasanguinis
contig_1_2253	AGL64700.2|GH23	8324OAN8	GH	GH23	Strep. parasanguinis
contig_1_2298	BEI59196.1|GH130_1	8324OAN8	GH	GH130_1	Strep. parasanguinis
contig_1_2302	CCO11994.2|GT4	8324OAN8	GT	GT4	Strep. parasanguinis
contig_1_2421	SQH66562.1|CBM34|GH13_20	8324OAN8	CBM	CBM34	Strep. parasanguinis
contig_1_2421	SQH66562.1|CBM34|GH13_20	8324OAN8	GH	GH13_20	Strep. parasanguinis
contig_1_2451	CCO09729.2|GH1	8324OAN8	GH	GH1	Strep. parasanguinis
contig_1_2465	AEH55353.1|CBM41|CBM48|GH13_14	8324OAN8	CBM	CBM41	Strep. parasanguinis
contig_1_2465	AEH55353.1|CBM41|CBM48|GH13_14	8324OAN8	CBM	CBM48	Strep. parasanguinis
contig_1_2465	AEH55353.1|CBM41|CBM48|GH13_14	8324OAN8	GH	GH13_14	Strep. parasanguinis
contig_1_2501	QEW09567.1|GT0	8324OAN8	GT	GT0	Strep. parasanguinis
contig_1_2502	AGY39911.1|GT2	8324OAN8	GT	GT2	Strep. parasanguinis
contig_1_2505	AGY39914.1|GT2	8324OAN8	GT	GT2	Strep. parasanguinis
contig_1_2507	AEH55326.1|GT4	8324OAN8	GT	GT4	Strep. parasanguinis
contig_1_2508	QEW10663.1|GT2	8324OAN8	GT	GT2	Strep. parasanguinis
contig_1_2510	AMP66829.1|GT2	8324OAN8	GT	GT2	Strep. parasanguinis
contig_1_2511	QEW09560.1|GT2	8324OAN8	GT	GT2	Strep. parasanguinis
contig_1_2514	QUB39716.1|GT2	8324OAN8	GT	GT2	Strep. parasanguinis
contig_1_2519	QEW09554.1|CE4	8324OAN8	CE	CE4	Strep. parasanguinis
contig_1_2606	CAD7245033.1|GT58	8324OAN8	GT	GT58	Strep. parasanguinis
contig_1_2616	QEW09482.1|GT5	8324OAN8	GT	GT5	Strep. parasanguinis
contig_1_2619	BBM21727.1|GH13_9	8324OAN8	GH	GH13_9	Strep. parasanguinis
contig_1_2620	QEW09479.1|CBM48|GH13_9	8324OAN8	CBM	CBM48	Strep. parasanguinis
contig_1_2620	QEW09479.1|CBM48|GH13_9	8324OAN8	GH	GH13_9	Strep. parasanguinis
contig_2_26	VED65856.1|GH25	8324OAN8	GH	GH25	Strep. parasanguinis
contig_1_26	CCO12102.2|GH13_31	8355A1	GH	GH13_31	Strep. salivarius
contig_1_28	QYU66396.1|GH13_23	8355A1	GH	GH13_23	Strep. salivarius
contig_1_44	CUS05224.2|CE14	8355A1	CE	CE14	Strep. salivarius
contig_1_75	AGL63717.2|GT4	8355A1	GT	GT4	Strep. salivarius
contig_1_78	CAD7252417.1|GH13	8355A1	GH	GH13	Strep. salivarius
contig_1_82	CAE6076421.1|GH27	8355A1	GH	GH27	Strep. salivarius
contig_1_102	ARI59334.1|GH73	8355A1	GH	GH73	Strep. salivarius
contig_1_121	WJM08831.1|CBM50	8355A1	CBM	CBM50	Strep. salivarius
contig_1_127	SQF74993.1|GH66	8355A1	GH	GH66	Strep. salivarius
contig_1_179	AGL64353.2|CBM50|GH25	8355A1	CBM	CBM50	Strep. salivarius
contig_1_179	AGL64353.2|CBM50|GH25	8355A1	GH	GH25	Strep. salivarius
contig_1_183	QYO62262.1|GH13	8355A1	GH	GH13	Strep. salivarius
contig_1_188	QGU77907.1|GT51	8355A1	GT	GT51	Strep. salivarius
contig_1_195	CUS04921.2|GT4	8355A1	GT	GT4	Strep. salivarius
contig_1_210	SQF75152.1|GT51	8355A1	GT	GT51	Strep. salivarius
contig_1_290	AGL64345.2|GT2	8355A1	GT	GT2	Strep. salivarius
contig_1_295	QBQ55251.1|CBM50	8355A1	CBM	CBM50	Strep. salivarius
contig_1_300	QEM33274.1|GH32	8355A1	GH	GH32	Strep. salivarius
contig_1_301	QEM33273.1|GH68	8355A1	GH	GH68	Strep. salivarius
contig_1_307	CCO10293.2|CBM50	8355A1	CBM	CBM50	Strep. salivarius
contig_1_317	CCO11054.2|CBM50	8355A1	CBM	CBM50	Strep. salivarius
contig_1_348	QEM33225.1|GT4	8355A1	GT	GT4	Strep. salivarius
contig_1_349	QEM33224.1|GT8	8355A1	GT	GT8	Strep. salivarius
contig_1_362	BBF72686.1|GT2	8355A1	GT	GT2	Strep. salivarius
contig_1_376	QGU82116.1|CBM50	8355A1	CBM	CBM50	Strep. salivarius
contig_1_382	CCO12633.2|GH84	8355A1	GH	GH84	Strep. salivarius
contig_1_391	QUI22575.1|CBM50	8355A1	CBM	CBM50	Strep. salivarius
contig_1_436	CAG7911095.1|GH5_11	8355A1	GH	GH5_11	Strep. salivarius
contig_1_476	QKH70144.1|GT2	8355A1	GT	GT2	Strep. salivarius
contig_1_480	QBS00157.1|GT8	8355A1	GT	GT8	Strep. salivarius
contig_1_481	AEJ52967.1|GT2	8355A1	GT	GT2	Strep. salivarius
contig_1_483	AEJ52969.1|GT2	8355A1	GT	GT2	Strep. salivarius
contig_1_485	ARC22886.2|GT2|GT4	8355A1	GT	GT2	Strep. salivarius
contig_1_485	ARC22886.2|GT2|GT4	8355A1	GT	GT4	Strep. salivarius
contig_1_487	QEM33113.1|GT4	8355A1	GT	GT4	Strep. salivarius
contig_1_489	CCB92855.1|GT4	8355A1	GT	GT4	Strep. salivarius
contig_1_490	CCB92856.1|GT2	8355A1	GT	GT2	Strep. salivarius
contig_1_493	SQF25488.1|GT0	8355A1	GT	GT0	Strep. salivarius
contig_1_519	ALR09732.2|GH92	8355A1	GH	GH92	Strep. salivarius
contig_1_531	AGL63871.2|GT2	8355A1	GT	GT2	Strep. salivarius
contig_1_532	QEM33069.1|CBM41|CBM48|GH13_14	8355A1	CBM	CBM41	Strep. salivarius
contig_1_532	QEM33069.1|CBM41|CBM48|GH13_14	8355A1	CBM	CBM48	Strep. salivarius
contig_1_532	QEM33069.1|CBM41|CBM48|GH13_14	8355A1	GH	GH13_14	Strep. salivarius
contig_1_533	QGU78229.1|CBM48|GH13_9	8355A1	CBM	CBM48	Strep. salivarius
contig_1_533	QGU78229.1|CBM48|GH13_9	8355A1	GH	GH13_9	Strep. salivarius
contig_1_534	BBM21727.1|GH13_9	8355A1	GH	GH13_9	Strep. salivarius
contig_1_536	ARI59723.1|GT5	8355A1	GT	GT5	Strep. salivarius
contig_1_537	SQF75520.1|GT35	8355A1	GT	GT35	Strep. salivarius
contig_1_552	ARI59740.1|GT2|GT8	8355A1	GT	GT2	Strep. salivarius
contig_1_552	ARI59740.1|GT2|GT8	8355A1	GT	GT8	Strep. salivarius
contig_1_553	QEM33046.1|GT8	8355A1	GT	GT8	Strep. salivarius
contig_1_554	SQF75538.1|GT8	8355A1	GT	GT8	Strep. salivarius
contig_1_555	SQF75539.1|GT4	8355A1	GT	GT4	Strep. salivarius
contig_1_556	SQF75540.1|GT8	8355A1	GT	GT8	Strep. salivarius
contig_1_557	CCB92926.1|GT113	8355A1	GT	GT113	Strep. salivarius
contig_1_558	ARI60599.1|GT8	8355A1	GT	GT8	Strep. salivarius
contig_1_559	QEM33040.1|GT2	8355A1	GT	GT2	Strep. salivarius
contig_1_560	QEM33039.1|GT101|GT8	8355A1	GT	GT101	Strep. salivarius
contig_1_560	QEM33039.1|GT101|GT8	8355A1	GT	GT8	Strep. salivarius
contig_1_561	QGU78258.1|GT8	8355A1	GT	GT8	Strep. salivarius
contig_1_576	QGU82289.1|GH70	8355A1	GH	GH70	Strep. salivarius
contig_1_602	ARI59780.1|GH70	8355A1	GH	GH70	Strep. salivarius
contig_1_603	AAE35922.1|GH70|2.4.1.5	8355A1	GH	GH70	Strep. salivarius
contig_1_605	QMI51308.1|GH70	8355A1	GH	GH70	Strep. salivarius
contig_1_628	QMI51275.1|GH13_31	8355A1	GH	GH13_31	Strep. salivarius
contig_1_632	ADN17640.1|GT2	8355A1	GT	GT2	Strep. salivarius
contig_1_634	AUH38424.1|GH42	8355A1	GH	GH42	Strep. salivarius
contig_1_635	QGU82343.1|GH2	8355A1	GH	GH2	Strep. salivarius
contig_1_650	CCO11681.2|GH25	8355A1	GH	GH25	Strep. salivarius
contig_1_710	ARC22668.1|CBM66|GH32	8355A1	CBM	CBM66	Strep. salivarius
contig_1_710	ARC22668.1|CBM66|GH32	8355A1	GH	GH32	Strep. salivarius
contig_1_753	AGL64700.2|GH23	8355A1	GH	GH23	Strep. salivarius
contig_1_757	AMJ20543.1|GH13_11	8355A1	GH	GH13_11	Strep. salivarius
contig_1_759	SQF75762.1|GH23	8355A1	GH	GH23	Strep. salivarius
contig_1_776	BEI59196.1|GH130_1	8355A1	GH	GH130_1	Strep. salivarius
contig_1_817	QEM32801.1|GH73	8355A1	GH	GH73	Strep. salivarius
contig_1_862	CAE6204650.1|GH28	8355A1	GH	GH28	Strep. salivarius
contig_1_898	AGL64020.2|AA10	8355A1	AA	AA10	Strep. salivarius
contig_1_902	AGL64020.2|AA10	8355A1	AA	AA10	Strep. salivarius
contig_1_961	UOT90669.1|GT35	8355A1	GT	GT35	Strep. salivarius
contig_1_962	QGU82617.1|GH77	8355A1	GH	GH77	Strep. salivarius
contig_1_977	QEM32671.1|CBM41|CBM48|GH13_12	8355A1	CBM	CBM41	Strep. salivarius
contig_1_977	QEM32671.1|CBM41|CBM48|GH13_12	8355A1	CBM	CBM48	Strep. salivarius
contig_1_977	QEM32671.1|CBM41|CBM48|GH13_12	8355A1	GH	GH13_12	Strep. salivarius
contig_1_978	SQF75952.1|GH25	8355A1	GH	GH25	Strep. salivarius
contig_1_995	QEM32654.1|GH1	8355A1	GH	GH1	Strep. salivarius
contig_1_1005	QTF54836.1|GT0	8355A1	GT	GT0	Strep. salivarius
contig_1_1006	QEM32646.1|GT2	8355A1	GT	GT2	Strep. salivarius
contig_1_1008	QEM32645.1|GT4	8355A1	GT	GT4	Strep. salivarius
contig_1_1009	QEM32644.1|GT2	8355A1	GT	GT2	Strep. salivarius
contig_1_1011	QGU82661.1|GT26	8355A1	GT	GT26	Strep. salivarius
contig_1_1031	CCB93411.1|GH73	8355A1	GH	GH73	Strep. salivarius
contig_1_1042	QBQ55251.1|CBM50	8355A1	CBM	CBM50	Strep. salivarius
contig_1_1064	CCB93441.1|GH8	8355A1	GH	GH8	Strep. salivarius
contig_1_1065	QEM32588.1|GT2	8355A1	GT	GT2	Strep. salivarius
contig_1_1068	WEA13229.1|GT0	8355A1	GT	GT0	Strep. salivarius
contig_1_1094	AWZ17133.1|GH13_30	8355A1	GH	GH13_30	Strep. salivarius
contig_1_1112	CCO11632.2|GH3	8355A1	GH	GH3	Strep. salivarius
contig_1_1125	ARI60278.1|GH70|2.4.1.5	8355A1	GH	GH70	Strep. salivarius
contig_1_1126	QGU78753.1|GH70	8355A1	GH	GH70	Strep. salivarius
contig_1_1127	QEM32528.1|GH70	8355A1	GH	GH70	Strep. salivarius
contig_1_1128	QEM32527.1|GT2	8355A1	GT	GT2	Strep. salivarius
contig_1_1145	BBD21966.1|GT2	8355A1	GT	GT2	Strep. salivarius
contig_1_1155	QAY63367.1|GT2	8355A1	GT	GT2	Strep. salivarius
contig_1_1196	ARI60345.1|GT28	8355A1	GT	GT28	Strep. salivarius
contig_1_1218	SQF76210.1|GH87	8355A1	GH	GH87	Strep. salivarius
contig_1_1237	CCB93622.1|GH25	8355A1	GH	GH25	Strep. salivarius
contig_1_1242	QEM32424.1|CBM50	8355A1	CBM	CBM50	Strep. salivarius
contig_1_1295	SQF76278.1|GT2|GT8	8355A1	GT	GT2	Strep. salivarius
contig_1_1295	SQF76278.1|GT2|GT8	8355A1	GT	GT8	Strep. salivarius
contig_1_1325	CCO09729.2|GH1	8355A1	GH	GH1	Strep. salivarius
contig_1_1336	CCO12112.2|GH13_31	8355A1	GH	GH13_31	Strep. salivarius
contig_1_1367	AGL63717.2|GT4	8355A1	GT	GT4	Strep. salivarius
contig_1_1399	CAN65674.1|GH28	8355A1	GH	GH28	Strep. salivarius
contig_1_1400	AEJ53857.1|GT4	8355A1	GT	GT4	Strep. salivarius
contig_1_1401	AEJ53858.1|GT4	8355A1	GT	GT4	Strep. salivarius
contig_1_1452	QXF33454.1|GH13_3	8355A1	GH	GH13_3	Strep. salivarius
contig_1_1457	ARI60575.1|CE9	8355A1	CE	CE9	Strep. salivarius
contig_1_1462	ARI58749.1|GH73	8355A1	GH	GH73	Strep. salivarius
contig_1_1475	CAD7245033.1|GT58	8355A1	GT	GT58	Strep. salivarius
contig_1_1498	ARI58783.1|GH13_5	8355A1	GH	GH13_5	Strep. salivarius
contig_1_1528	SQF76523.1|CE4	8355A1	CE	CE4	Strep. salivarius
contig_1_1537	AGL63702.2|GT4	8355A1	GT	GT4	Strep. salivarius
contig_1_1573	WAO96723.1|GH0	8355A1	GH	GH0	Strep. salivarius
contig_1_1584	AGL63717.2|GT4	8355A1	GT	GT4	Strep. salivarius
contig_1_1602	QMI51566.1|GH1	8355A1	GH	GH1	Strep. salivarius
contig_1_1608	AIY21730.1|GH1	8355A1	GH	GH1	Strep. salivarius
contig_1_1729	AOG60880.1|GH32	8355A1	GH	GH32	Strep. salivarius
contig_1_1730	QEM31996.1|GH32	8355A1	GH	GH32	Strep. salivarius
contig_1_1751	CCO11994.2|GT4	8355A1	GT	GT4	Strep. salivarius
contig_1_1770	AEJ52649.1|CBM50	8355A1	CBM	CBM50	Strep. salivarius
contig_1_1778	CAD7226128.1|GH38	8355A1	GH	GH38	Strep. salivarius
contig_1_1826	CAI32748.2|GT4	8355A1	GT	GT4	Strep. salivarius
contig_1_1859	CCO12868.2|GH1	8355A1	GH	GH1	Strep. salivarius
contig_1_1861	SQF76842.1|GT51	8355A1	GT	GT51	Strep. salivarius
contig_1_1866	WAO96723.1|GH0	8355A1	GH	GH0	Strep. salivarius
contig_1_1875	SQF76856.1|GH13_29	8355A1	GH	GH13_29	Strep. salivarius
contig_1_1876	QCH95999.1|GH13_29	8355A1	GH	GH13_29	Strep. salivarius
contig_1_1903	QMI51832.1|GH73	8355A1	GH	GH73	Strep. salivarius
contig_1_1944	CAN80640.1|GT47	8355A1	GT	GT47	Strep. salivarius
contig_1_1964	ALR08738.2|GT83	8355A1	GT	GT83	Strep. salivarius
contig_1_1992	CCB96357.1|GH23	8355A1	GH	GH23	Strep. salivarius
contig_1_1994	SQF76967.1|CBM50	8355A1	CBM	CBM50	Strep. salivarius
contig_1_3	AMD97906.1|GT2	8355AN1	GT	GT2	Strep. infantis
contig_1_19	UJD03079.1|GH20	8355AN1	GH	GH20	Strep. infantis
contig_1_21	QLF56299.1|GH38	8355AN1	GH	GH38	Strep. infantis
contig_1_22	AMD96071.1|GH125	8355AN1	GH	GH125	Strep. infantis
contig_1_23	AMD96072.1|GH92	8355AN1	GH	GH92	Strep. infantis
contig_1_80	CAN80640.1|GT47	8355AN1	GT	GT47	Strep. infantis
contig_1_111	CCO12102.2|GH13_31	8355AN1	GH	GH13_31	Strep. infantis
contig_1_114	QYU66396.1|GH13_23	8355AN1	GH	GH13_23	Strep. infantis
contig_1_121	AMD96210.1|GH20	8355AN1	GH	GH20	Strep. infantis
contig_1_123	AMD96212.1|GH35	8355AN1	GH	GH35	Strep. infantis
contig_1_164	ALR08738.2|GT83	8355AN1	GT	GT83	Strep. infantis
contig_1_169	AGL62895.2|GH13	8355AN1	GH	GH13	Strep. infantis
contig_1_170	CCO11983.2|CBM50|CE4	8355AN1	CBM	CBM50	Strep. infantis
contig_1_170	CCO11983.2|CBM50|CE4	8355AN1	CE	CE4	Strep. infantis
contig_1_171	AMD96265.1|GH77	8355AN1	GH	GH77	Strep. infantis
contig_1_172	AMD96266.1|GT35	8355AN1	GT	GT35	Strep. infantis
contig_1_255	CCO12868.2|GH1	8355AN1	GH	GH1	Strep. infantis
contig_1_274	AMD97773.1|CE9	8355AN1	CE	CE9	Strep. infantis
contig_1_323	AMD97715.1|CE7	8355AN1	CE	CE7	Strep. infantis
contig_1_324	AMD97714.1|CBM40|GH33	8355AN1	CBM	CBM40	Strep. infantis
contig_1_324	AMD97714.1|CBM40|GH33	8355AN1	GH	GH33	Strep. infantis
contig_1_325	AMD97713.1|CBM40|GH33	8355AN1	CBM	CBM40	Strep. infantis
contig_1_325	AMD97713.1|CBM40|GH33	8355AN1	GH	GH33	Strep. infantis
contig_1_334	AMD97704.1|GH29	8355AN1	GH	GH29	Strep. infantis
contig_1_369	AMH89601.1|GH95	8355AN1	GH	GH95	Strep. infantis
contig_1_383	QLF56100.1|CBM32|GH85	8355AN1	CBM	CBM32	Strep. infantis
contig_1_383	QLF56100.1|CBM32|GH85	8355AN1	GH	GH85	Strep. infantis
contig_1_397	BBP10455.1|CBM41|GH13_12	8355AN1	CBM	CBM41	Strep. infantis
contig_1_397	BBP10455.1|CBM41|GH13_12	8355AN1	GH	GH13_12	Strep. infantis
contig_1_428	AGL64020.2|AA10	8355AN1	AA	AA10	Strep. infantis
contig_1_486	ALR09732.2|GH92	8355AN1	GH	GH92	Strep. infantis
contig_1_496	AMD97553.1|GH32	8355AN1	GH	GH32	Strep. infantis
contig_1_497	AGL62906.2|GH13_31	8355AN1	GH	GH13_31	Strep. infantis
contig_1_501	AMD97547.1|GT2	8355AN1	GT	GT2	Strep. infantis
contig_1_502	QBQ55251.1|CBM50	8355AN1	CBM	CBM50	Strep. infantis
contig_1_535	AMD97517.1|CBM34|GH13_20	8355AN1	CBM	CBM34	Strep. infantis
contig_1_535	AMD97517.1|CBM34|GH13_20	8355AN1	GH	GH13_20	Strep. infantis
contig_1_538	AMD97515.1|CBM71|GH2	8355AN1	CBM	CBM71	Strep. infantis
contig_1_538	AMD97515.1|CBM71|GH2	8355AN1	GH	GH2	Strep. infantis
contig_1_542	AMD97511.1|GT28	8355AN1	GT	GT28	Strep. infantis
contig_1_559	QBQ55156.1|CBM50	8355AN1	CBM	CBM50	Strep. infantis
contig_1_576	CCO10293.2|CBM50	8355AN1	CBM	CBM50	Strep. infantis
contig_1_589	CCO11054.2|CBM50	8355AN1	CBM	CBM50	Strep. infantis
contig_1_606	QXF33454.1|GH13_3	8355AN1	GH	GH13_3	Strep. infantis
contig_1_680	AGL63871.2|GT2	8355AN1	GT	GT2	Strep. infantis
contig_1_681	CBJ22778.1|CBM32|GH101	8355AN1	CBM	CBM32	Strep. infantis
contig_1_681	CBJ22778.1|CBM32|GH101	8355AN1	GH	GH101	Strep. infantis
contig_1_682	AMD97395.1|CBM32|GH20|GH84	8355AN1	CBM	CBM32	Strep. infantis
contig_1_682	AMD97395.1|CBM32|GH20|GH84	8355AN1	GH	GH20	Strep. infantis
contig_1_682	AMD97395.1|CBM32|GH20|GH84	8355AN1	GH	GH84	Strep. infantis
contig_1_717	CCO12633.2|GH84	8355AN1	GH	GH84	Strep. infantis
contig_1_812	CAD7245033.1|GT58	8355AN1	GT	GT58	Strep. infantis
contig_1_869	AMD97194.1|CBM41|CBM48|GH13_14	8355AN1	CBM	CBM41	Strep. infantis
contig_1_869	AMD97194.1|CBM41|CBM48|GH13_14	8355AN1	CBM	CBM48	Strep. infantis
contig_1_869	AMD97194.1|CBM41|CBM48|GH13_14	8355AN1	GH	GH13_14	Strep. infantis
contig_1_871	AMD97192.1|CBM48|GH13_9	8355AN1	CBM	CBM48	Strep. infantis
contig_1_871	AMD97192.1|CBM48|GH13_9	8355AN1	GH	GH13_9	Strep. infantis
contig_1_872	BBM21727.1|GH13_9	8355AN1	GH	GH13_9	Strep. infantis
contig_1_874	AMD97189.1|GT5	8355AN1	GT	GT5	Strep. infantis
contig_1_878	CCO12112.2|GH13_31	8355AN1	GH	GH13_31	Strep. infantis
contig_1_879	CCO11632.2|GH3	8355AN1	GH	GH3	Strep. infantis
contig_1_886	CAE6204650.1|GH28	8355AN1	GH	GH28	Strep. infantis
contig_1_899	AMP67745.1|GH1	8355AN1	GH	GH1	Strep. infantis
contig_1_911	AGL64700.2|GH23	8355AN1	GH	GH23	Strep. infantis
contig_1_915	AMJ20543.1|GH13_11	8355AN1	GH	GH13_11	Strep. infantis
contig_1_917	AMD97148.1|GH23	8355AN1	GH	GH23	Strep. infantis
contig_1_1027	AMD97043.1|GH73	8355AN1	GH	GH73	Strep. infantis
contig_1_1029	BBD21966.1|GT2	8355AN1	GT	GT2	Strep. infantis
contig_1_1030	AMD97041.1|GT2	8355AN1	GT	GT2	Strep. infantis
contig_1_1049	AMD97025.1|GH25	8355AN1	GH	GH25	Strep. infantis
contig_1_1105	BEI59196.1|GH130_1	8355AN1	GH	GH130_1	Strep. infantis
contig_1_1113	CCO11994.2|GT4	8355AN1	GT	GT4	Strep. infantis
contig_1_1120	AMD96970.1|GT4	8355AN1	GT	GT4	Strep. infantis
contig_1_1121	AMD97964.1|GT4	8355AN1	GT	GT4	Strep. infantis
contig_1_1135	QUI22575.1|CBM50	8355AN1	CBM	CBM50	Strep. infantis
contig_1_1193	BBF72686.1|GT2	8355AN1	GT	GT2	Strep. infantis
contig_1_1255	AMD97956.1|GT2	8355AN1	GT	GT2	Strep. infantis
contig_1_1270	AMD96783.1|CE4	8355AN1	CE	CE4	Strep. infantis
contig_1_1280	UTX66819.1|CBM32|GH84	8355AN1	CBM	CBM32	Strep. infantis
contig_1_1280	UTX66819.1|CBM32|GH84	8355AN1	GH	GH84	Strep. infantis
contig_1_1281	AMD96776.1|CBM71|GH2	8355AN1	CBM	CBM71	Strep. infantis
contig_1_1281	AMD96776.1|CBM71|GH2	8355AN1	GH	GH2	Strep. infantis
contig_1_1286	AGL63717.2|GT4	8355AN1	GT	GT4	Strep. infantis
contig_1_1300	CAN65674.1|GH28	8355AN1	GH	GH28	Strep. infantis
contig_1_1326	CAE6076421.1|GH27	8355AN1	GH	GH27	Strep. infantis
contig_1_1330	CAD7252417.1|GH13	8355AN1	GH	GH13	Strep. infantis
contig_1_1356	UJD03486.1|GT2	8355AN1	GT	GT2	Strep. infantis
contig_1_1357	UJD03485.1|GT4	8355AN1	GT	GT4	Strep. infantis
contig_1_1362	CCO09729.2|GH1	8355AN1	GH	GH1	Strep. infantis
contig_1_1370	AMD96695.1|GH13_5	8355AN1	GH	GH13_5	Strep. infantis
contig_1_1427	CCO11681.2|GH25	8355AN1	GH	GH25	Strep. infantis
contig_1_1468	CBA03971.1|GT30	8355AN1	GT	GT30	Strep. infantis
contig_1_1474	AMD96601.1|GT51	8355AN1	GT	GT51	Strep. infantis
contig_1_1477	AGL63717.2|GT4	8355AN1	GT	GT4	Strep. infantis
contig_1_1506	AGL63702.2|GT4	8355AN1	GT	GT4	Strep. infantis
contig_1_1537	QYO62262.1|GH13	8355AN1	GH	GH13	Strep. infantis
contig_1_1560	AGL64345.2|GT2	8355AN1	GT	GT2	Strep. infantis
contig_1_1616	QAY63367.1|GT2	8355AN1	GT	GT2	Strep. infantis
contig_1_1620	UGZ04840.1|GT0	8355AN1	GT	GT0	Strep. infantis
contig_1_1621	UGZ04839.1|GT2	8355AN1	GT	GT2	Strep. infantis
contig_1_1626	AMD97657.1|GT4	8355AN1	GT	GT4	Strep. infantis
contig_1_1635	UJD04287.1|GH13_31	8355AN1	GH	GH13_31	Strep. infantis
contig_1_1688	CAD7226128.1|GH38	8355AN1	GH	GH38	Strep. infantis
contig_1_1712	WAO96723.1|GH0	8355AN1	GH	GH0	Strep. infantis
contig_1_1721	BAV79148.1|CBM50	8355AN1	CBM	CBM50	Strep. infantis
contig_1_1738	AMD96354.1|GT8	8355AN1	GT	GT8	Strep. infantis
contig_1_1739	AMD96353.1|GT4	8355AN1	GT	GT4	Strep. infantis
contig_1_1745	QKL33665.1|GT113	8355AN1	GT	GT113	Strep. infantis
contig_1_1746	UGQ07596.1|GT101|GT8	8355AN1	GT	GT101	Strep. infantis
contig_1_1746	UGQ07596.1|GT101|GT8	8355AN1	GT	GT8	Strep. infantis
contig_1_1748	VFH74132.1|GT2	8355AN1	GT	GT2	Strep. infantis
contig_1_1749	QKL34067.1|GT8	8355AN1	GT	GT8	Strep. infantis
contig_1_1750	QKL33667.1|GT8	8355AN1	GT	GT8	Strep. infantis
contig_1_1751	QKL33669.1|GT2	8355AN1	GT	GT2	Strep. infantis
contig_1_1767	CUS04921.2|GT4	8355AN1	GT	GT4	Strep. infantis
contig_1_1770	CCO09992.2|GH32	8355AN1	GH	GH32	Strep. infantis
contig_1_1774	CAI32748.2|GT4	8355AN1	GT	GT4	Strep. infantis
contig_1_1775	AMD97937.1|GT51	8355AN1	GT	GT51	Strep. infantis
contig_1_1782	AMD96326.1|GH1	8355AN1	GH	GH1	Strep. infantis
contig_1_1783	AGL64353.2|CBM50|GH25	8355AN1	CBM	CBM50	Strep. infantis
contig_1_1783	AGL64353.2|CBM50|GH25	8355AN1	GH	GH25	Strep. infantis
contig_1_1792	CAG7911095.1|GH5_11	8355AN1	GH	GH5_11	Strep. infantis
contig_1_1799	AGL63717.2|GT4	8355AN1	GT	GT4	Strep. infantis
contig_1_1810	AMD97834.1|GT1	8355AN1	GT	GT1	Strep. infantis
contig_1_1814	AMD97838.1|GT51	8355AN1	GT	GT51	Strep. infantis
contig_1_7	QEM31996.1|GH32	8355AN2	GH	GH32	Strep. salivarius
contig_1_8	AOG60880.1|GH32	8355AN2	GH	GH32	Strep. salivarius
contig_1_127	AIY21730.1|GH1	8355AN2	GH	GH1	Strep. salivarius
contig_1_133	QMI51566.1|GH1	8355AN2	GH	GH1	Strep. salivarius
contig_1_151	AGL63717.2|GT4	8355AN2	GT	GT4	Strep. salivarius
contig_1_162	WAO96723.1|GH0	8355AN2	GH	GH0	Strep. salivarius
contig_1_198	AGL63702.2|GT4	8355AN2	GT	GT4	Strep. salivarius
contig_1_207	SQF76523.1|CE4	8355AN2	CE	CE4	Strep. salivarius
contig_1_237	ARI58783.1|GH13_5	8355AN2	GH	GH13_5	Strep. salivarius
contig_1_260	CAD7245033.1|GT58	8355AN2	GT	GT58	Strep. salivarius
contig_1_273	ARI58749.1|GH73	8355AN2	GH	GH73	Strep. salivarius
contig_1_278	ARI60575.1|CE9	8355AN2	CE	CE9	Strep. salivarius
contig_1_283	QXF33454.1|GH13_3	8355AN2	GH	GH13_3	Strep. salivarius
contig_1_334	AEJ53858.1|GT4	8355AN2	GT	GT4	Strep. salivarius
contig_1_335	AEJ53857.1|GT4	8355AN2	GT	GT4	Strep. salivarius
contig_1_336	CAN65674.1|GH28	8355AN2	GH	GH28	Strep. salivarius
contig_2_9	QGU82343.1|GH2	8355AN2	GH	GH2	Strep. salivarius
contig_2_10	AUH38424.1|GH42	8355AN2	GH	GH42	Strep. salivarius
contig_2_12	ADN17640.1|GT2	8355AN2	GT	GT2	Strep. salivarius
contig_2_16	QMI51275.1|GH13_31	8355AN2	GH	GH13_31	Strep. salivarius
contig_2_39	QMI51308.1|GH70	8355AN2	GH	GH70	Strep. salivarius
contig_2_41	AAE35922.1|GH70|2.4.1.5	8355AN2	GH	GH70	Strep. salivarius
contig_2_42	ARI59780.1|GH70	8355AN2	GH	GH70	Strep. salivarius
contig_2_68	QGU82289.1|GH70	8355AN2	GH	GH70	Strep. salivarius
contig_2_79	QGU78258.1|GT8	8355AN2	GT	GT8	Strep. salivarius
contig_2_80	QEM33039.1|GT101|GT8	8355AN2	GT	GT101	Strep. salivarius
contig_2_80	QEM33039.1|GT101|GT8	8355AN2	GT	GT8	Strep. salivarius
contig_2_81	QEM33040.1|GT2	8355AN2	GT	GT2	Strep. salivarius
contig_2_82	ARI60599.1|GT8	8355AN2	GT	GT8	Strep. salivarius
contig_2_83	CCB92926.1|GT113	8355AN2	GT	GT113	Strep. salivarius
contig_2_84	SQF75540.1|GT8	8355AN2	GT	GT8	Strep. salivarius
contig_2_85	SQF75539.1|GT4	8355AN2	GT	GT4	Strep. salivarius
contig_2_86	SQF75538.1|GT8	8355AN2	GT	GT8	Strep. salivarius
contig_2_87	QEM33046.1|GT8	8355AN2	GT	GT8	Strep. salivarius
contig_2_88	ARI59740.1|GT2|GT8	8355AN2	GT	GT2	Strep. salivarius
contig_2_88	ARI59740.1|GT2|GT8	8355AN2	GT	GT8	Strep. salivarius
contig_2_103	SQF75520.1|GT35	8355AN2	GT	GT35	Strep. salivarius
contig_2_104	ARI59723.1|GT5	8355AN2	GT	GT5	Strep. salivarius
contig_2_106	BBM21727.1|GH13_9	8355AN2	GH	GH13_9	Strep. salivarius
contig_2_107	QGU78229.1|CBM48|GH13_9	8355AN2	CBM	CBM48	Strep. salivarius
contig_2_107	QGU78229.1|CBM48|GH13_9	8355AN2	GH	GH13_9	Strep. salivarius
contig_2_108	QEM33069.1|CBM41|CBM48|GH13_14	8355AN2	CBM	CBM41	Strep. salivarius
contig_2_108	QEM33069.1|CBM41|CBM48|GH13_14	8355AN2	CBM	CBM48	Strep. salivarius
contig_2_108	QEM33069.1|CBM41|CBM48|GH13_14	8355AN2	GH	GH13_14	Strep. salivarius
contig_2_109	AGL63871.2|GT2	8355AN2	GT	GT2	Strep. salivarius
contig_2_121	ALR09732.2|GH92	8355AN2	GH	GH92	Strep. salivarius
contig_2_147	SQF25488.1|GT0	8355AN2	GT	GT0	Strep. salivarius
contig_2_150	CCB92856.1|GT2	8355AN2	GT	GT2	Strep. salivarius
contig_2_151	CCB92855.1|GT4	8355AN2	GT	GT4	Strep. salivarius
contig_2_153	QEM33113.1|GT4	8355AN2	GT	GT4	Strep. salivarius
contig_2_155	CAD0170096.1|GT2|GT4	8355AN2	GT	GT2	Strep. salivarius
contig_2_155	CAD0170096.1|GT2|GT4	8355AN2	GT	GT4	Strep. salivarius
contig_3_10	BEI59196.1|GH130_1	8355AN2	GH	GH130_1	Strep. salivarius
contig_3_51	QEM32801.1|GH73	8355AN2	GH	GH73	Strep. salivarius
contig_3_96	CAE6204650.1|GH28	8355AN2	GH	GH28	Strep. salivarius
contig_3_132	AGL64020.2|AA10	8355AN2	AA	AA10	Strep. salivarius
contig_3_136	AGL64020.2|AA10	8355AN2	AA	AA10	Strep. salivarius
contig_3_195	UOT90669.1|GT35	8355AN2	GT	GT35	Strep. salivarius
contig_3_196	QGU82617.1|GH77	8355AN2	GH	GH77	Strep. salivarius
contig_3_211	QEM32671.1|CBM41|CBM48|GH13_12	8355AN2	CBM	CBM41	Strep. salivarius
contig_3_211	QEM32671.1|CBM41|CBM48|GH13_12	8355AN2	CBM	CBM48	Strep. salivarius
contig_3_211	QEM32671.1|CBM41|CBM48|GH13_12	8355AN2	GH	GH13_12	Strep. salivarius
contig_4_31	CAI32748.2|GT4	8355AN2	GT	GT4	Strep. salivarius
contig_4_64	CCO12868.2|GH1	8355AN2	GH	GH1	Strep. salivarius
contig_4_66	SQF76842.1|GT51	8355AN2	GT	GT51	Strep. salivarius
contig_4_71	WAO96723.1|GH0	8355AN2	GH	GH0	Strep. salivarius
contig_4_80	SQF76856.1|GH13_29	8355AN2	GH	GH13_29	Strep. salivarius
contig_4_81	QCH95999.1|GH13_29	8355AN2	GH	GH13_29	Strep. salivarius
contig_4_108	QMI51832.1|GH73	8355AN2	GH	GH73	Strep. salivarius
contig_5_35	SQF75152.1|GT51	8355AN2	GT	GT51	Strep. salivarius
contig_5_50	CUS04921.2|GT4	8355AN2	GT	GT4	Strep. salivarius
contig_5_57	QGU77907.1|GT51	8355AN2	GT	GT51	Strep. salivarius
contig_5_62	QYO62262.1|GH13	8355AN2	GH	GH13	Strep. salivarius
contig_5_66	AGL64353.2|CBM50|GH25	8355AN2	CBM	CBM50	Strep. salivarius
contig_5_66	AGL64353.2|CBM50|GH25	8355AN2	GH	GH25	Strep. salivarius
contig_5_118	SQF74993.1|GH66	8355AN2	GH	GH66	Strep. salivarius
contig_6_22	QAY63367.1|GT2	8355AN2	GT	GT2	Strep. salivarius
contig_6_32	BBD21966.1|GT2	8355AN2	GT	GT2	Strep. salivarius
contig_6_49	QEM32527.1|GT2	8355AN2	GT	GT2	Strep. salivarius
contig_6_50	QEM32528.1|GH70	8355AN2	GH	GH70	Strep. salivarius
contig_6_51	QGU78753.1|GH70	8355AN2	GH	GH70	Strep. salivarius
contig_6_52	ARI60278.1|GH70|2.4.1.5	8355AN2	GH	GH70	Strep. salivarius
contig_6_65	CCO11632.2|GH3	8355AN2	GH	GH3	Strep. salivarius
contig_6_83	AWZ17133.1|GH13_30	8355AN2	GH	GH13_30	Strep. salivarius
contig_7_10	ARI60345.1|GT28	8355AN2	GT	GT28	Strep. salivarius
contig_7_32	SQF76210.1|GH87	8355AN2	GH	GH87	Strep. salivarius
contig_7_51	CCB93622.1|GH25	8355AN2	GH	GH25	Strep. salivarius
contig_7_56	QEM32424.1|CBM50	8355AN2	CBM	CBM50	Strep. salivarius
contig_8_6	CCO11681.2|GH25	8355AN2	GH	GH25	Strep. salivarius
contig_8_66	ARC22668.1|CBM66|GH32	8355AN2	CBM	CBM66	Strep. salivarius
contig_8_66	ARC22668.1|CBM66|GH32	8355AN2	GH	GH32	Strep. salivarius
contig_9_3	QEM33225.1|GT4	8355AN2	GT	GT4	Strep. salivarius
contig_9_4	QEM33224.1|GT8	8355AN2	GT	GT8	Strep. salivarius
contig_9_17	BBF72686.1|GT2	8355AN2	GT	GT2	Strep. salivarius
contig_9_31	QGU82116.1|CBM50	8355AN2	CBM	CBM50	Strep. salivarius
contig_9_37	CCO12633.2|GH84	8355AN2	GH	GH84	Strep. salivarius
contig_9_46	QUI22575.1|CBM50	8355AN2	CBM	CBM50	Strep. salivarius
contig_10_15	SQF76967.1|CBM50	8355AN2	CBM	CBM50	Strep. salivarius
contig_10_16	CCB96357.1|GH23	8355AN2	GH	GH23	Strep. salivarius
contig_10_44	ALR08738.2|GT83	8355AN2	GT	GT83	Strep. salivarius
contig_10_64	CAN80640.1|GT47	8355AN2	GT	GT47	Strep. salivarius
contig_11_3	QBQ55251.1|CBM50	8355AN2	CBM	CBM50	Strep. salivarius
contig_11_8	AGL64345.2|GT2	8355AN2	GT	GT2	Strep. salivarius
contig_12_37	AGL64700.2|GH23	8355AN2	GH	GH23	Strep. salivarius
contig_12_41	AMJ20543.1|GH13_11	8355AN2	GH	GH13_11	Strep. salivarius
contig_12_43	SQF75762.1|GH23	8355AN2	GH	GH23	Strep. salivarius
contig_13_1	QGU78609.1|GH25	8355AN2	GH	GH25	Strep. salivarius
contig_13_18	QEM32654.1|GH1	8355AN2	GH	GH1	Strep. salivarius
contig_13_28	QTF54836.1|GT0	8355AN2	GT	GT0	Strep. salivarius
contig_13_29	QEM32646.1|GT2	8355AN2	GT	GT2	Strep. salivarius
contig_13_31	QEM32645.1|GT4	8355AN2	GT	GT4	Strep. salivarius
contig_13_32	QEM32644.1|GT2	8355AN2	GT	GT2	Strep. salivarius
contig_13_34	QGU82661.1|GT26	8355AN2	GT	GT26	Strep. salivarius
contig_14_6	CUS05224.2|CE14	8355AN2	CE	CE14	Strep. salivarius
contig_14_22	QYU66396.1|GH13_23	8355AN2	GH	GH13_23	Strep. salivarius
contig_14_24	CCO12102.2|GH13_31	8355AN2	GH	GH13_31	Strep. salivarius
contig_15_7	AGL63717.2|GT4	8355AN2	GT	GT4	Strep. salivarius
contig_15_10	CAD7252417.1|GH13	8355AN2	GH	GH13	Strep. salivarius
contig_15_14	CAE6076421.1|GH27	8355AN2	GH	GH27	Strep. salivarius
contig_15_33	ARI59334.1|GH73	8355AN2	GH	GH73	Strep. salivarius
contig_16_1	WEA13229.1|GT0	8355AN2	GT	GT0	Strep. salivarius
contig_16_4	QEM32588.1|GT2	8355AN2	GT	GT2	Strep. salivarius
contig_16_5	CCB93441.1|GH8	8355AN2	GH	GH8	Strep. salivarius
contig_16_27	QBQ55251.1|CBM50	8355AN2	CBM	CBM50	Strep. salivarius
contig_16_38	CCB93411.1|GH73	8355AN2	GH	GH73	Strep. salivarius
contig_17_6	CCO09729.2|GH1	8355AN2	GH	GH1	Strep. salivarius
contig_17_36	SQF76278.1|GT2|GT8	8355AN2	GT	GT2	Strep. salivarius
contig_17_36	SQF76278.1|GT2|GT8	8355AN2	GT	GT8	Strep. salivarius
contig_18_13	CCO11994.2|GT4	8355AN2	GT	GT4	Strep. salivarius
contig_18_32	AEJ52649.1|CBM50	8355AN2	CBM	CBM50	Strep. salivarius
contig_19_28	CCO12112.2|GH13_31	8355AN2	GH	GH13_31	Strep. salivarius
contig_20_1	CCO11054.2|CBM50	8355AN2	CBM	CBM50	Strep. salivarius
contig_21_2	CAG7911095.1|GH5_11	8355AN2	GH	GH5_11	Strep. salivarius
contig_22_19	QKH70144.1|GT2	8355AN2	GT	GT2	Strep. salivarius
contig_22_23	QBS00157.1|GT8	8355AN2	GT	GT8	Strep. salivarius
contig_22_24	AEJ52967.1|GT2	8355AN2	GT	GT2	Strep. salivarius
contig_22_26	AEJ52969.1|GT2	8355AN2	GT	GT2	Strep. salivarius
contig_23_23	AGL63717.2|GT4	8355AN2	GT	GT4	Strep. salivarius
contig_25_10	CCO10293.2|CBM50	8355AN2	CBM	CBM50	Strep. salivarius
contig_25_16	QEM33273.1|GH68	8355AN2	GH	GH68	Strep. salivarius
contig_25_17	QEM33274.1|GH32	8355AN2	GH	GH32	Strep. salivarius
contig_26_4	WJM08831.1|CBM50	8355AN2	CBM	CBM50	Strep. salivarius
contig_27_15	CAD7226128.1|GH38	8355AN2	GH	GH38	Strep. salivarius
contig_40_1	QGU78609.1|GH25	8355AN2	GH	GH25	Strep. salivarius
contig_1_9	QBX22013.1|GH73	8389O4	GH	GH73	Strep. sp013394695
contig_1_32	CCO12102.2|GH13_31	8389O4	GH	GH13_31	Strep. sp013394695
contig_1_35	QYU66396.1|GH13_23	8389O4	GH	GH13_23	Strep. sp013394695
contig_1_42	QLF54782.1|GH20	8389O4	GH	GH20	Strep. sp013394695
contig_1_44	QLF54784.1|GH35	8389O4	GH	GH35	Strep. sp013394695
contig_1_71	QLF54810.1|GT2	8389O4	GT	GT2	Strep. sp013394695
contig_1_79	ALR08738.2|GT83	8389O4	GT	GT83	Strep. sp013394695
contig_1_84	AGL62895.2|GH13	8389O4	GH	GH13	Strep. sp013394695
contig_1_85	CCO11983.2|CBM50|CE4	8389O4	CBM	CBM50	Strep. sp013394695
contig_1_85	CCO11983.2|CBM50|CE4	8389O4	CE	CE4	Strep. sp013394695
contig_1_86	UJD04479.1|GH77	8389O4	GH	GH77	Strep. sp013394695
contig_1_87	UJD04478.1|GT35	8389O4	GT	GT35	Strep. sp013394695
contig_1_137	CAG7911095.1|GH5_11	8389O4	GH	GH5_11	Strep. sp013394695
contig_1_145	AGL64353.2|CBM50|GH25	8389O4	CBM	CBM50	Strep. sp013394695
contig_1_145	AGL64353.2|CBM50|GH25	8389O4	GH	GH25	Strep. sp013394695
contig_1_146	QLF54884.1|GH1	8389O4	GH	GH1	Strep. sp013394695
contig_1_152	QLF54890.1|GT51	8389O4	GT	GT51	Strep. sp013394695
contig_1_153	CAI32748.2|GT4	8389O4	GT	GT4	Strep. sp013394695
contig_1_157	CCO09992.2|GH32	8389O4	GH	GH32	Strep. sp013394695
contig_1_158	CUS04921.2|GT4	8389O4	GT	GT4	Strep. sp013394695
contig_1_183	QLF54921.1|CBM50	8389O4	CBM	CBM50	Strep. sp013394695
contig_1_191	WAO96723.1|GH0	8389O4	GH	GH0	Strep. sp013394695
contig_1_222	CAD7226128.1|GH38	8389O4	GH	GH38	Strep. sp013394695
contig_1_272	QLF54988.1|CE7	8389O4	CE	CE7	Strep. sp013394695
contig_1_273	QLF54989.1|CBM40|GH33	8389O4	CBM	CBM40	Strep. sp013394695
contig_1_273	QLF54989.1|CBM40|GH33	8389O4	GH	GH33	Strep. sp013394695
contig_1_282	AMD97704.1|GH29	8389O4	GH	GH29	Strep. sp013394695
contig_1_306	UJD04287.1|GH13_31	8389O4	GH	GH13_31	Strep. sp013394695
contig_1_314	QLF55053.1|GT111	8389O4	GT	GT111	Strep. sp013394695
contig_1_317	ACB45501.1|GT4	8389O4	GT	GT4	Strep. sp013394695
contig_1_318	QLF55057.1|GT2	8389O4	GT	GT2	Strep. sp013394695
contig_1_319	CAI33109.1|GT2	8389O4	GT	GT2	Strep. sp013394695
contig_1_346	AGL64020.2|AA10	8389O4	AA	AA10	Strep. sp013394695
contig_1_406	UJD04197.1|GH32	8389O4	GH	GH32	Strep. sp013394695
contig_1_407	AGL62906.2|GH13_31	8389O4	GH	GH13_31	Strep. sp013394695
contig_1_412	AMD97547.1|GT2	8389O4	GT	GT2	Strep. sp013394695
contig_1_413	QBQ55251.1|CBM50	8389O4	CBM	CBM50	Strep. sp013394695
contig_1_439	CAD7252417.1|GH13	8389O4	GH	GH13	Strep. sp013394695
contig_1_459	CAN65674.1|GH28	8389O4	GH	GH28	Strep. sp013394695
contig_1_484	AGL63717.2|GT4	8389O4	GT	GT4	Strep. sp013394695
contig_1_490	QLF55216.1|CBM71|GH2	8389O4	CBM	CBM71	Strep. sp013394695
contig_1_490	QLF55216.1|CBM71|GH2	8389O4	GH	GH2	Strep. sp013394695
contig_1_500	UJD04123.1|CE4	8389O4	CE	CE4	Strep. sp013394695
contig_1_506	AWZ17133.1|GH13_30	8389O4	GH	GH13_30	Strep. sp013394695
contig_1_544	AGL63871.2|GT2	8389O4	GT	GT2	Strep. sp013394695
contig_1_545	QLF55289.1|CBM32|GH101	8389O4	CBM	CBM32	Strep. sp013394695
contig_1_545	QLF55289.1|CBM32|GH101	8389O4	GH	GH101	Strep. sp013394695
contig_1_546	QLF55290.1|CBM32|GH20|GH84	8389O4	CBM	CBM32	Strep. sp013394695
contig_1_546	QLF55290.1|CBM32|GH20|GH84	8389O4	GH	GH20	Strep. sp013394695
contig_1_546	QLF55290.1|CBM32|GH20|GH84	8389O4	GH	GH84	Strep. sp013394695
contig_1_579	CCO12633.2|GH84	8389O4	GH	GH84	Strep. sp013394695
contig_1_663	CAD7245033.1|GT58	8389O4	GT	GT58	Strep. sp013394695
contig_1_714	QLF55473.1|CBM41|CBM48|GH13_14	8389O4	CBM	CBM41	Strep. sp013394695
contig_1_714	QLF55473.1|CBM41|CBM48|GH13_14	8389O4	CBM	CBM48	Strep. sp013394695
contig_1_714	QLF55473.1|CBM41|CBM48|GH13_14	8389O4	GH	GH13_14	Strep. sp013394695
contig_1_716	QLF55474.1|CBM48|GH13_9	8389O4	CBM	CBM48	Strep. sp013394695
contig_1_716	QLF55474.1|CBM48|GH13_9	8389O4	GH	GH13_9	Strep. sp013394695
contig_1_717	BBM21727.1|GH13_9	8389O4	GH	GH13_9	Strep. sp013394695
contig_1_719	QLF55477.1|GT5	8389O4	GT	GT5	Strep. sp013394695
contig_1_723	CCO12112.2|GH13_31	8389O4	GH	GH13_31	Strep. sp013394695
contig_1_724	CCO11632.2|GH3	8389O4	GH	GH3	Strep. sp013394695
contig_1_731	CAE6204650.1|GH28	8389O4	GH	GH28	Strep. sp013394695
contig_1_744	UJD03873.1|GH1	8389O4	GH	GH1	Strep. sp013394695
contig_1_760	QLF55514.1|GH25	8389O4	GH	GH25	Strep. sp013394695
contig_1_773	AMD97041.1|GT2	8389O4	GT	GT2	Strep. sp013394695
contig_1_774	BBD21966.1|GT2	8389O4	GT	GT2	Strep. sp013394695
contig_1_776	QLF55526.1|GH73	8389O4	GH	GH73	Strep. sp013394695
contig_1_865	QLF55610.1|GH23	8389O4	GH	GH23	Strep. sp013394695
contig_1_867	AMJ20543.1|GH13_11	8389O4	GH	GH13_11	Strep. sp013394695
contig_1_871	AGL64700.2|GH23	8389O4	GH	GH23	Strep. sp013394695
contig_1_904	BEI59196.1|GH130_1	8389O4	GH	GH130_1	Strep. sp013394695
contig_1_909	CCO11994.2|GT4	8389O4	GT	GT4	Strep. sp013394695
contig_1_915	QLF55657.1|GT4	8389O4	GT	GT4	Strep. sp013394695
contig_1_916	QLF56365.1|GT4	8389O4	GT	GT4	Strep. sp013394695
contig_1_928	QUI22575.1|CBM50	8389O4	CBM	CBM50	Strep. sp013394695
contig_1_979	BBF72686.1|GT2	8389O4	GT	GT2	Strep. sp013394695
contig_1_1016	QLF55758.1|GH66	8389O4	GH	GH66	Strep. sp013394695
contig_1_1074	QXF33454.1|GH13_3	8389O4	GH	GH13_3	Strep. sp013394695
contig_1_1089	CCO11054.2|CBM50	8389O4	CBM	CBM50	Strep. sp013394695
contig_1_1102	CCO10293.2|CBM50	8389O4	CBM	CBM50	Strep. sp013394695
contig_1_1116	QBQ55156.1|CBM50	8389O4	CBM	CBM50	Strep. sp013394695
contig_1_1122	QLF55861.1|GT28	8389O4	GT	GT28	Strep. sp013394695
contig_1_1126	QLF55865.1|CBM71|GH2	8389O4	CBM	CBM71	Strep. sp013394695
contig_1_1126	QLF55865.1|CBM71|GH2	8389O4	GH	GH2	Strep. sp013394695
contig_1_1128	UJD03507.1|CBM34|GH13_20	8389O4	CBM	CBM34	Strep. sp013394695
contig_1_1128	UJD03507.1|CBM34|GH13_20	8389O4	GH	GH13_20	Strep. sp013394695
contig_1_1155	QQQ36042.1|GT2	8389O4	GT	GT2	Strep. sp013394695
contig_1_1160	CCO09729.2|GH1	8389O4	GH	GH1	Strep. sp013394695
contig_1_1169	UJD03472.1|GH13_5	8389O4	GH	GH13_5	Strep. sp013394695
contig_1_1264	CCO11681.2|GH25	8389O4	GH	GH25	Strep. sp013394695
contig_1_1298	CBA03971.1|GT30	8389O4	GT	GT30	Strep. sp013394695
contig_1_1304	QLF55982.1|GT51	8389O4	GT	GT51	Strep. sp013394695
contig_1_1307	AGL63717.2|GT4	8389O4	GT	GT4	Strep. sp013394695
contig_1_1331	AGL63702.2|GT4	8389O4	GT	GT4	Strep. sp013394695
contig_1_1359	QYO62262.1|GH13	8389O4	GH	GH13	Strep. sp013394695
contig_1_1380	AGL64345.2|GT2	8389O4	GT	GT2	Strep. sp013394695
contig_1_1426	QLF56100.1|CBM32|GH85	8389O4	CBM	CBM32	Strep. sp013394695
contig_1_1426	QLF56100.1|CBM32|GH85	8389O4	GH	GH85	Strep. sp013394695
contig_1_1439	QLF56113.1|GH95	8389O4	GH	GH95	Strep. sp013394695
contig_1_1489	QLF56161.1|CE9	8389O4	CE	CE9	Strep. sp013394695
contig_1_1510	CCO12868.2|GH1	8389O4	GH	GH1	Strep. sp013394695
contig_1_1532	AGL63717.2|GT4	8389O4	GT	GT4	Strep. sp013394695
contig_1_1554	QLF56223.1|GT1	8389O4	GT	GT1	Strep. sp013394695
contig_1_1556	QLF56225.1|GT51	8389O4	GT	GT51	Strep. sp013394695
contig_1_1617	QLF56283.1|GT2	8389O4	GT	GT2	Strep. sp013394695
contig_1_1631	QLF56297.1|GH20	8389O4	GH	GH20	Strep. sp013394695
contig_1_1633	QLF56299.1|GH38	8389O4	GH	GH38	Strep. sp013394695
contig_1_1634	QLF56300.1|GH125	8389O4	GH	GH125	Strep. sp013394695
contig_1_1635	QLF56301.1|GH92	8389O4	GH	GH92	Strep. sp013394695
contig_1_1686	CAN80640.1|GT47	8389O4	GT	GT47	Strep. sp013394695
contig_2_48	QBX22013.1|GH73	8389O4	GH	GH73	Strep. sp013394695
contig_1_17	CAN80640.1|GT47	8389S2	GT	GT47	Strep. oralis
contig_1_68	APD22603.1|GH25	8389S2	GH	GH25	Strep. oralis
contig_1_95	CCO12102.2|GH13_31	8389S2	GH	GH13_31	Strep. oralis
contig_1_98	QYU66396.1|GH13_23	8389S2	GH	GH13_23	Strep. oralis
contig_1_107	CBY99772.1|GH20	8389S2	GH	GH20	Strep. oralis
contig_1_109	ATF57648.1|GH35	8389S2	GH	GH35	Strep. oralis
contig_1_155	WAO96723.1|GH0	8389S2	GH	GH0	Strep. oralis
contig_1_170	ALR08738.2|GT83	8389S2	GT	GT83	Strep. oralis
contig_1_209	AGL62895.2|GH13	8389S2	GH	GH13	Strep. oralis
contig_1_210	CCO11983.2|CBM50|CE4	8389S2	CBM	CBM50	Strep. oralis
contig_1_210	CCO11983.2|CBM50|CE4	8389S2	CE	CE4	Strep. oralis
contig_1_211	ATF57722.1|GH77	8389S2	GH	GH77	Strep. oralis
contig_1_212	QLL96516.1|GT35	8389S2	GT	GT35	Strep. oralis
contig_1_217	UJC99538.1|GT51	8389S2	GT	GT51	Strep. oralis
contig_1_223	CAI32748.2|GT4	8389S2	GT	GT4	Strep. oralis
contig_1_245	BAV79148.1|CBM50	8389S2	CBM	CBM50	Strep. oralis
contig_1_252	QCZ56995.1|CE9	8389S2	CE	CE9	Strep. oralis
contig_1_275	UNV67707.1|GT51	8389S2	GT	GT51	Strep. oralis
contig_1_282	QRO08163.1|CBM41|CBM48|GH13_12	8389S2	CBM	CBM41	Strep. oralis
contig_1_282	QRO08163.1|CBM41|CBM48|GH13_12	8389S2	CBM	CBM48	Strep. oralis
contig_1_282	QRO08163.1|CBM41|CBM48|GH13_12	8389S2	GH	GH13_12	Strep. oralis
contig_1_284	CCO12868.2|GH1	8389S2	GH	GH1	Strep. oralis
contig_1_314	CAD7226128.1|GH38	8389S2	GH	GH38	Strep. oralis
contig_1_327	AGL63717.2|GT4	8389S2	GT	GT4	Strep. oralis
contig_1_336	UJC99638.1|GH13_31	8389S2	GH	GH13_31	Strep. oralis
contig_1_346	CAI34471.1|GT111	8389S2	GT	GT111	Strep. oralis
contig_1_349	QLF55056.1|GT4	8389S2	GT	GT4	Strep. oralis
contig_1_350	QLF55057.1|GT2	8389S2	GT	GT2	Strep. oralis
contig_1_351	QLF55058.1|GT2	8389S2	GT	GT2	Strep. oralis
contig_1_357	UJC99654.1|CBM32|GH101	8389S2	CBM	CBM32	Strep. oralis
contig_1_357	UJC99654.1|CBM32|GH101	8389S2	GH	GH101	Strep. oralis
contig_1_358	UTX67095.1|CBM32|GH20|GH84	8389S2	CBM	CBM32	Strep. oralis
contig_1_358	UTX67095.1|CBM32|GH20|GH84	8389S2	GH	GH20	Strep. oralis
contig_1_358	UTX67095.1|CBM32|GH20|GH84	8389S2	GH	GH84	Strep. oralis
contig_1_359	UJC99656.1|GT51	8389S2	GT	GT51	Strep. oralis
contig_1_365	CBA03971.1|GT30	8389S2	GT	GT30	Strep. oralis
contig_1_411	AGL63702.2|GT4	8389S2	GT	GT4	Strep. oralis
contig_1_437	CBZ01186.1|GH32	8389S2	GH	GH32	Strep. oralis
contig_1_438	AGL62906.2|GH13_31	8389S2	GH	GH13_31	Strep. oralis
contig_1_453	CAD7252417.1|GH13	8389S2	GH	GH13	Strep. oralis
contig_1_478	CAN65674.1|GH28	8389S2	GH	GH28	Strep. oralis
contig_1_624	AGL63717.2|GT4	8389S2	GT	GT4	Strep. oralis
contig_1_631	UJD00631.1|CBM71|GH2	8389S2	CBM	CBM71	Strep. oralis
contig_1_631	UJD00631.1|CBM71|GH2	8389S2	GH	GH2	Strep. oralis
contig_1_632	UTX66819.1|CBM32|GH84	8389S2	CBM	CBM32	Strep. oralis
contig_1_632	UTX66819.1|CBM32|GH84	8389S2	GH	GH84	Strep. oralis
contig_1_640	UJD00622.1|CE4	8389S2	CE	CE4	Strep. oralis
contig_1_674	AGL63871.2|GT2	8389S2	GT	GT2	Strep. oralis
contig_1_757	UJD02298.1|GH73	8389S2	GH	GH73	Strep. oralis
contig_1_796	QUI22575.1|CBM50	8389S2	CBM	CBM50	Strep. oralis
contig_1_810	BBA08701.1|GT4	8389S2	GT	GT4	Strep. oralis
contig_1_811	VTS71433.1|GT4	8389S2	GT	GT4	Strep. oralis
contig_1_851	CAD7245033.1|GT58	8389S2	GT	GT58	Strep. oralis
contig_1_863	UJD02204.1|GH25	8389S2	GH	GH25	Strep. oralis
contig_1_913	CCO11994.2|GT4	8389S2	GT	GT4	Strep. oralis
contig_1_919	BEI59196.1|GH130_1	8389S2	GH	GH130_1	Strep. oralis
contig_1_924	VTS71128.1|CBM41|CBM48|GH13_14	8389S2	CBM	CBM41	Strep. oralis
contig_1_924	VTS71128.1|CBM41|CBM48|GH13_14	8389S2	CBM	CBM48	Strep. oralis
contig_1_924	VTS71128.1|CBM41|CBM48|GH13_14	8389S2	GH	GH13_14	Strep. oralis
contig_1_926	UJD00371.1|CBM48|GH13_9	8389S2	CBM	CBM48	Strep. oralis
contig_1_926	UJD00371.1|CBM48|GH13_9	8389S2	GH	GH13_9	Strep. oralis
contig_1_927	BBM21727.1|GH13_9	8389S2	GH	GH13_9	Strep. oralis
contig_1_929	UJD02087.1|GT5	8389S2	GT	GT5	Strep. oralis
contig_1_934	CCO12112.2|GH13_31	8389S2	GH	GH13_31	Strep. oralis
contig_1_1015	VTS70972.1|CBM34|GH13_20	8389S2	CBM	CBM34	Strep. oralis
contig_1_1015	VTS70972.1|CBM34|GH13_20	8389S2	GH	GH13_20	Strep. oralis
contig_1_1025	ANR75830.1|GH23	8389S2	GH	GH23	Strep. oralis
contig_1_1027	AMJ20543.1|GH13_11	8389S2	GH	GH13_11	Strep. oralis
contig_1_1031	AGL64700.2|GH23	8389S2	GH	GH23	Strep. oralis
contig_1_1052	UJD02179.1|GH1	8389S2	GH	GH1	Strep. oralis
contig_1_1117	CAE6204650.1|GH28	8389S2	GH	GH28	Strep. oralis
contig_1_1124	CCO11632.2|GH3	8389S2	GH	GH3	Strep. oralis
contig_1_1171	CCO12633.2|GH84	8389S2	GH	GH84	Strep. oralis
contig_1_1201	BBF72686.1|GT2	8389S2	GT	GT2	Strep. oralis
contig_1_1218	UJD00049.1|GT2	8389S2	GT	GT2	Strep. oralis
contig_1_1223	CCO09729.2|GH1	8389S2	GH	GH1	Strep. oralis
contig_1_1231	UJD00037.1|GH13_5	8389S2	GH	GH13_5	Strep. oralis
contig_1_1280	CCO11054.2|CBM50	8389S2	CBM	CBM50	Strep. oralis
contig_1_1297	QBQ55251.1|CBM50	8389S2	CBM	CBM50	Strep. oralis
contig_1_1318	BAV79462.1|GT2	8389S2	GT	GT2	Strep. oralis
contig_1_1364	UJD01650.1|CBM40|GH33	8389S2	CBM	CBM40	Strep. oralis
contig_1_1364	UJD01650.1|CBM40|GH33	8389S2	GH	GH33	Strep. oralis
contig_1_1366	UJC99905.1|CE7	8389S2	CE	CE7	Strep. oralis
contig_1_1389	CCO10293.2|CBM50	8389S2	CBM	CBM50	Strep. oralis
contig_1_1408	QXF33454.1|GH13_3	8389S2	GH	GH13_3	Strep. oralis
contig_1_1423	UJD00685.1|GT8	8389S2	GT	GT8	Strep. oralis
contig_1_1424	UJD00686.1|GT4	8389S2	GT	GT4	Strep. oralis
contig_1_1433	UJD00695.1|CBM71|GH2	8389S2	CBM	CBM71	Strep. oralis
contig_1_1433	UJD00695.1|CBM71|GH2	8389S2	GH	GH2	Strep. oralis
contig_1_1453	QRO07405.1|GH1	8389S2	GH	GH1	Strep. oralis
contig_1_1458	QBQ55156.1|CBM50	8389S2	CBM	CBM50	Strep. oralis
contig_1_1477	BAV80252.1|GT28	8389S2	GT	GT28	Strep. oralis
contig_1_1496	URK67726.1|GH13_18	8389S2	GH	GH13_18	Strep. oralis
contig_1_1500	URK68292.1|GH36	8389S2	GH	GH36	Strep. oralis
contig_1_1509	QYO62262.1|GH13	8389S2	GH	GH13	Strep. oralis
contig_1_1523	CAG7911095.1|GH5_11	8389S2	GH	GH5_11	Strep. oralis
contig_1_1531	AGL64345.2|GT2	8389S2	GT	GT2	Strep. oralis
contig_1_1586	UNV67818.1|CBM32|GH85	8389S2	CBM	CBM32	Strep. oralis
contig_1_1586	UNV67818.1|CBM32|GH85	8389S2	GH	GH85	Strep. oralis
contig_1_1604	QQL00502.1|GH95	8389S2	GH	GH95	Strep. oralis
contig_1_1612	VTS72818.1|GH29	8389S2	GH	GH29	Strep. oralis
contig_1_1616	QCE38396.1|GT2	8389S2	GT	GT2	Strep. oralis
contig_1_1695	UJD00944.1|GH1	8389S2	GH	GH1	Strep. oralis
contig_1_1696	AGL64353.2|CBM50|GH25	8389S2	CBM	CBM50	Strep. oralis
contig_1_1696	AGL64353.2|CBM50|GH25	8389S2	GH	GH25	Strep. oralis
contig_1_1713	VTS73155.1|GT113	8389S2	GT	GT113	Strep. oralis
contig_1_1718	CUS04921.2|GT4	8389S2	GT	GT4	Strep. oralis
contig_1_1825	UJD01077.1|GT2	8389S2	GT	GT2	Strep. oralis
contig_1_1849	UJD01092.1|GH20	8389S2	GH	GH20	Strep. oralis
contig_1_1851	ANR75089.1|GH38	8389S2	GH	GH38	Strep. oralis
contig_1_1852	QRO08005.1|GH125	8389S2	GH	GH125	Strep. oralis
contig_1_1853	WFR86929.1|GH92	8389S2	GH	GH92	Strep. oralis
contig_1_1854	QQL01374.1|GH29	8389S2	GH	GH29	Strep. oralis
contig_1_1881	AGL63717.2|GT4	8389S2	GT	GT4	Strep. oralis
contig_1_25	CCO12102.2|GH13_31	8389SA4	GH	GH13_31	Strep. sp001556435
contig_1_28	QYU66396.1|GH13_23	8389SA4	GH	GH13_23	Strep. sp001556435
contig_1_47	CUS05224.2|CE14	8389SA4	CE	CE14	Strep. sp001556435
contig_1_75	AGL63717.2|GT4	8389SA4	GT	GT4	Strep. sp001556435
contig_1_78	CAD7252417.1|GH13	8389SA4	GH	GH13	Strep. sp001556435
contig_1_81	CAE6076421.1|GH27	8389SA4	GH	GH27	Strep. sp001556435
contig_1_111	ARC48648.1|GH73	8389SA4	GH	GH73	Strep. sp001556435
contig_1_130	WJM08831.1|CBM50	8389SA4	CBM	CBM50	Strep. sp001556435
contig_1_134	ARC33576.1|GH66	8389SA4	GH	GH66	Strep. sp001556435
contig_1_173	AGL64353.2|CBM50|GH25	8389SA4	CBM	CBM50	Strep. sp001556435
contig_1_173	AGL64353.2|CBM50|GH25	8389SA4	GH	GH25	Strep. sp001556435
contig_1_177	QYO62262.1|GH13	8389SA4	GH	GH13	Strep. sp001556435
contig_1_182	QGU79831.1|GT51	8389SA4	GT	GT51	Strep. sp001556435
contig_1_189	CUS04921.2|GT4	8389SA4	GT	GT4	Strep. sp001556435
contig_1_201	QGU79852.1|GT51	8389SA4	GT	GT51	Strep. sp001556435
contig_1_293	AGL64345.2|GT2	8389SA4	GT	GT2	Strep. sp001556435
contig_1_298	QBQ55251.1|CBM50	8389SA4	CBM	CBM50	Strep. sp001556435
contig_1_301	ARC33739.1|GH32	8389SA4	GH	GH32	Strep. sp001556435
contig_1_302	UOT90036.1|GH68	8389SA4	GH	GH68	Strep. sp001556435
contig_1_308	CCO10293.2|CBM50	8389SA4	CBM	CBM50	Strep. sp001556435
contig_1_318	CCO11054.2|CBM50	8389SA4	CBM	CBM50	Strep. sp001556435
contig_1_372	ARC48415.1|GT4	8389SA4	GT	GT4	Strep. sp001556435
contig_1_373	QGU79997.1|GT8	8389SA4	GT	GT8	Strep. sp001556435
contig_1_386	BBF72686.1|GT2	8389SA4	GT	GT2	Strep. sp001556435
contig_1_400	ARC33808.1|CBM50	8389SA4	CBM	CBM50	Strep. sp001556435
contig_1_406	CCO12633.2|GH84	8389SA4	GH	GH84	Strep. sp001556435
contig_1_412	QUI22575.1|CBM50	8389SA4	CBM	CBM50	Strep. sp001556435
contig_1_456	CAG7911095.1|GH5_11	8389SA4	GH	GH5_11	Strep. sp001556435
contig_1_464	CAD7245033.1|GT58	8389SA4	GT	GT58	Strep. sp001556435
contig_1_478	ARI58749.1|GH73	8389SA4	GH	GH73	Strep. sp001556435
contig_1_484	AEJ53918.1|CE9	8389SA4	CE	CE9	Strep. sp001556435
contig_1_489	QXF33454.1|GH13_3	8389SA4	GH	GH13_3	Strep. sp001556435
contig_1_546	ARI57676.1|GT4	8389SA4	GT	GT4	Strep. sp001556435
contig_1_547	QGU80151.1|GT4	8389SA4	GT	GT4	Strep. sp001556435
contig_1_549	CAN65674.1|GH28	8389SA4	GH	GH28	Strep. sp001556435
contig_1_580	AGL63717.2|GT4	8389SA4	GT	GT4	Strep. sp001556435
contig_1_611	CCO12112.2|GH13_31	8389SA4	GH	GH13_31	Strep. sp001556435
contig_1_622	CCO09729.2|GH1	8389SA4	GH	GH1	Strep. sp001556435
contig_1_697	QKH71249.1|CBM50	8389SA4	CBM	CBM50	Strep. sp001556435
contig_1_706	QGU80336.1|GH25	8389SA4	GH	GH25	Strep. sp001556435
contig_1_715	ARC49812.1|GH87	8389SA4	GH	GH87	Strep. sp001556435
contig_1_739	ARC48061.1|GT28	8389SA4	GT	GT28	Strep. sp001556435
contig_1_778	QAY63367.1|GT2	8389SA4	GT	GT2	Strep. sp001556435
contig_1_788	BBD21966.1|GT2	8389SA4	GT	GT2	Strep. sp001556435
contig_1_804	ARI57428.1|GT2	8389SA4	GT	GT2	Strep. sp001556435
contig_1_805	CCB95176.1|GH70	8389SA4	GH	GH70	Strep. sp001556435
contig_1_806	ARC34185.1|GH70	8389SA4	GH	GH70	Strep. sp001556435
contig_1_814	QGU80438.1|GH70	8389SA4	GH	GH70	Strep. sp001556435
contig_1_828	CCO11632.2|GH3	8389SA4	GH	GH3	Strep. sp001556435
contig_1_879	ARC34247.1|GT4	8389SA4	GT	GT4	Strep. sp001556435
contig_1_906	QBQ55251.1|CBM50	8389SA4	CBM	CBM50	Strep. sp001556435
contig_1_917	QGU80532.1|GH73	8389SA4	GH	GH73	Strep. sp001556435
contig_1_945	CCC19979.1|GT4	8389SA4	GT	GT4	Strep. sp001556435
contig_1_946	ARC49788.1|GT4	8389SA4	GT	GT4	Strep. sp001556435
contig_1_948	QGU80561.1|GT2	8389SA4	GT	GT2	Strep. sp001556435
contig_1_949	ALL03893.1|GT2	8389SA4	GT	GT2	Strep. sp001556435
contig_1_955	ARC49781.1|GT113	8389SA4	GT	GT113	Strep. sp001556435
contig_1_962	ARC49774.1|GH1	8389SA4	GH	GH1	Strep. sp001556435
contig_1_979	ARC34341.1|GH25	8389SA4	GH	GH25	Strep. sp001556435
contig_1_983	ARC49756.1|CBM41|CBM48|GH13_12	8389SA4	CBM	CBM41	Strep. sp001556435
contig_1_983	ARC49756.1|CBM41|CBM48|GH13_12	8389SA4	CBM	CBM48	Strep. sp001556435
contig_1_983	ARC49756.1|CBM41|CBM48|GH13_12	8389SA4	GH	GH13_12	Strep. sp001556435
contig_1_994	ARC34355.1|GH77	8389SA4	GH	GH77	Strep. sp001556435
contig_1_995	UOT90669.1|GT35	8389SA4	GT	GT35	Strep. sp001556435
contig_1_1056	QBQ55156.1|CBM50	8389SA4	CBM	CBM50	Strep. sp001556435
contig_1_1059	AGL64020.2|AA10	8389SA4	AA	AA10	Strep. sp001556435
contig_1_1086	CAE6204650.1|GH28	8389SA4	GH	GH28	Strep. sp001556435
contig_1_1121	ARC49628.1|GH73	8389SA4	GH	GH73	Strep. sp001556435
contig_1_1161	BEI59196.1|GH130_1	8389SA4	GH	GH130_1	Strep. sp001556435
contig_1_1182	QKH69912.1|GH23	8389SA4	GH	GH23	Strep. sp001556435
contig_1_1184	AMJ20543.1|GH13_11	8389SA4	GH	GH13_11	Strep. sp001556435
contig_1_1188	AGL64700.2|GH23	8389SA4	GH	GH23	Strep. sp001556435
contig_1_1230	ARC34567.1|CBM66|GH32	8389SA4	CBM	CBM66	Strep. sp001556435
contig_1_1230	ARC34567.1|CBM66|GH32	8389SA4	GH	GH32	Strep. sp001556435
contig_1_1306	AEJ53119.1|GH2	8389SA4	GH	GH2	Strep. sp001556435
contig_1_1307	AUH38424.1|GH42	8389SA4	GH	GH42	Strep. sp001556435
contig_1_1309	ADN17640.1|GT2	8389SA4	GT	GT2	Strep. sp001556435
contig_1_1313	ARC49454.1|GH13_31	8389SA4	GH	GH13_31	Strep. sp001556435
contig_1_1314	QGU82335.1|GH13_18	8389SA4	GH	GH13_18	Strep. sp001556435
contig_1_1320	ARI56977.1|GH36	8389SA4	GH	GH36	Strep. sp001556435
contig_1_1322	QMI51284.1|GH13_31	8389SA4	GH	GH13_31	Strep. sp001556435
contig_1_1344	AMB83051.1|GH70	8389SA4	GH	GH70	Strep. sp001556435
contig_1_1346	AAE35922.1|GH70|2.4.1.5	8389SA4	GH	GH70	Strep. sp001556435
contig_1_1347	QGU80914.1|GH70	8389SA4	GH	GH70	Strep. sp001556435
contig_1_1373	QGU81582.1|GH70	8389SA4	GH	GH70	Strep. sp001556435
contig_1_1382	VFH59171.1|GT101|GT8	8389SA4	GT	GT101	Strep. sp001556435
contig_1_1382	VFH59171.1|GT101|GT8	8389SA4	GT	GT8	Strep. sp001556435
contig_1_1383	VFI28424.1|GT101|GT8	8389SA4	GT	GT101	Strep. sp001556435
contig_1_1383	VFI28424.1|GT101|GT8	8389SA4	GT	GT8	Strep. sp001556435
contig_1_1384	QGU80944.1|GT113	8389SA4	GT	GT113	Strep. sp001556435
contig_1_1387	QGU80947.1|GT8	8389SA4	GT	GT8	Strep. sp001556435
contig_1_1388	CCB95773.1|GT4	8389SA4	GT	GT4	Strep. sp001556435
contig_1_1394	ALR80332.1|GT2|GT8	8389SA4	GT	GT2	Strep. sp001556435
contig_1_1394	ALR80332.1|GT2|GT8	8389SA4	GT	GT8	Strep. sp001556435
contig_1_1415	QGU80969.1|GT35	8389SA4	GT	GT35	Strep. sp001556435
contig_1_1416	ARC49350.1|GT5	8389SA4	GT	GT5	Strep. sp001556435
contig_1_1418	BBM21727.1|GH13_9	8389SA4	GH	GH13_9	Strep. sp001556435
contig_1_1419	ARC34671.1|CBM48|GH13_9	8389SA4	CBM	CBM48	Strep. sp001556435
contig_1_1419	ARC34671.1|CBM48|GH13_9	8389SA4	GH	GH13_9	Strep. sp001556435
contig_1_1420	ARC34672.1|CBM41|CBM48|GH13_14	8389SA4	CBM	CBM41	Strep. sp001556435
contig_1_1420	ARC34672.1|CBM41|CBM48|GH13_14	8389SA4	CBM	CBM48	Strep. sp001556435
contig_1_1420	ARC34672.1|CBM41|CBM48|GH13_14	8389SA4	GH	GH13_14	Strep. sp001556435
contig_1_1421	AGL63871.2|GT2	8389SA4	GT	GT2	Strep. sp001556435
contig_1_1433	ALR09732.2|GH92	8389SA4	GH	GH92	Strep. sp001556435
contig_1_1459	VEE19593.1|GT0	8389SA4	GT	GT0	Strep. sp001556435
contig_1_1462	CCB92856.1|GT2	8389SA4	GT	GT2	Strep. sp001556435
contig_1_1463	ARC22883.1|GT4	8389SA4	GT	GT4	Strep. sp001556435
contig_1_1464	ARC22884.1|GT4	8389SA4	GT	GT4	Strep. sp001556435
contig_1_1466	ARI58621.1|GT2|GT4	8389SA4	GT	GT2	Strep. sp001556435
contig_1_1466	ARI58621.1|GT2|GT4	8389SA4	GT	GT4	Strep. sp001556435
contig_1_1471	QEM33117.1|GT2	8389SA4	GT	GT2	Strep. sp001556435
contig_1_1472	QEM33118.1|GT2	8389SA4	GT	GT2	Strep. sp001556435
contig_1_1475	QEM33121.1|GT2	8389SA4	GT	GT2	Strep. sp001556435
contig_1_1477	SQF75460.1|GT2	8389SA4	GT	GT2	Strep. sp001556435
contig_1_1524	ARC49256.1|GH13_5	8389SA4	GH	GH13_5	Strep. sp001556435
contig_1_1558	CCB95926.1|CE4	8389SA4	CE	CE4	Strep. sp001556435
contig_1_1567	AGL63702.2|GT4	8389SA4	GT	GT4	Strep. sp001556435
contig_1_1608	WAO96723.1|GH0	8389SA4	GH	GH0	Strep. sp001556435
contig_1_1619	AGL63717.2|GT4	8389SA4	GT	GT4	Strep. sp001556435
contig_1_1641	ARC33115.1|GH1	8389SA4	GH	GH1	Strep. sp001556435
contig_1_1647	CCB96006.1|GH1	8389SA4	GH	GH1	Strep. sp001556435
contig_1_1760	ARC49049.1|GH32	8389SA4	GH	GH32	Strep. sp001556435
contig_1_1784	CCO11994.2|GT4	8389SA4	GT	GT4	Strep. sp001556435
contig_1_1804	QGU81310.1|CBM50	8389SA4	CBM	CBM50	Strep. sp001556435
contig_1_1811	CAD7226128.1|GH38	8389SA4	GH	GH38	Strep. sp001556435
contig_1_1872	CAI32748.2|GT4	8389SA4	GT	GT4	Strep. sp001556435
contig_1_1904	CCO12868.2|GH1	8389SA4	GH	GH1	Strep. sp001556435
contig_1_1906	QGU81395.1|GT51	8389SA4	GT	GT51	Strep. sp001556435
contig_1_1911	WAO96723.1|GH0	8389SA4	GH	GH0	Strep. sp001556435
contig_1_1920	AEJ52543.1|GH13_29	8389SA4	GH	GH13_29	Strep. sp001556435
contig_1_1958	CAN80640.1|GT47	8389SA4	GT	GT47	Strep. sp001556435
contig_1_1979	ALR08738.2|GT83	8389SA4	GT	GT83	Strep. sp001556435
contig_1_2015	QKH70582.1|GT2	8389SA4	GT	GT2	Strep. sp001556435
contig_1_2016	ARC49191.1|GT2	8389SA4	GT	GT2	Strep. sp001556435
contig_1_2040	ARC48763.1|GH23	8389SA4	GH	GH23	Strep. sp001556435
contig_1_72	CCO11994.2|GT4	8408OA3	GT	GT4	Strep. parasanguinis
contig_1_74	BEI59196.1|GH130_1	8408OA3	GH	GH130_1	Strep. parasanguinis
contig_1_105	WAO96723.1|GH0	8408OA3	GH	GH0	Strep. parasanguinis
contig_1_109	AGL64700.2|GH23	8408OA3	GH	GH23	Strep. parasanguinis
contig_1_112	AMJ20543.1|GH13_11	8408OA3	GH	GH13_11	Strep. parasanguinis
contig_1_114	QWL82947.1|GH23	8408OA3	GH	GH23	Strep. parasanguinis
contig_1_118	QEW09764.1|GT1	8408OA3	GT	GT1	Strep. parasanguinis
contig_1_127	AFJ26040.1|CE7	8408OA3	CE	CE7	Strep. parasanguinis
contig_1_179	QEW09800.1|GH87	8408OA3	GH	GH87	Strep. parasanguinis
contig_1_207	AGL63717.2|GT4	8408OA3	GT	GT4	Strep. parasanguinis
contig_1_217	QEW09809.1|GH73	8408OA3	GH	GH73	Strep. parasanguinis
contig_1_246	CAE6204650.1|GH28	8408OA3	GH	GH28	Strep. parasanguinis
contig_1_328	AMP67745.1|GH1	8408OA3	GH	GH1	Strep. parasanguinis
contig_1_340	QBX25357.1|GH73	8408OA3	GH	GH73	Strep. parasanguinis
contig_1_424	AEH55758.1|GH13_5	8408OA3	GH	GH13_5	Strep. parasanguinis
contig_1_447	ADN17640.1|GT2	8408OA3	GT	GT2	Strep. parasanguinis
contig_1_477	QAY63367.1|GT2	8408OA3	GT	GT2	Strep. parasanguinis
contig_1_510	CCO11681.2|GH25	8408OA3	GH	GH25	Strep. parasanguinis
contig_1_527	CCO12112.2|GH13_31	8408OA3	GH	GH13_31	Strep. parasanguinis
contig_1_544	QBQ55251.1|CBM50	8408OA3	CBM	CBM50	Strep. parasanguinis
contig_1_554	AFJ26415.1|GH25	8408OA3	GH	GH25	Strep. parasanguinis
contig_1_594	CAN65674.1|GH28	8408OA3	GH	GH28	Strep. parasanguinis
contig_1_595	AEH55937.1|GT4	8408OA3	GT	GT4	Strep. parasanguinis
contig_1_596	AFJ26454.1|GT4	8408OA3	GT	GT4	Strep. parasanguinis
contig_1_635	AGL63871.2|GT2	8408OA3	GT	GT2	Strep. parasanguinis
contig_1_657	CCO10293.2|CBM50	8408OA3	CBM	CBM50	Strep. parasanguinis
contig_1_671	CCO11054.2|CBM50	8408OA3	CBM	CBM50	Strep. parasanguinis
contig_1_674	QWL83524.1|GH13_29	8408OA3	GH	GH13_29	Strep. parasanguinis
contig_1_723	CBA03971.1|GT30	8408OA3	GT	GT30	Strep. parasanguinis
contig_1_779	AFJ26641.1|GH32	8408OA3	GH	GH32	Strep. parasanguinis
contig_1_792	QEW10325.1|GT2	8408OA3	GT	GT2	Strep. parasanguinis
contig_1_793	BBD21966.1|GT2	8408OA3	GT	GT2	Strep. parasanguinis
contig_1_809	QEW10342.1|GH13_31	8408OA3	GH	GH13_31	Strep. parasanguinis
contig_1_810	AEH56192.1|GH31	8408OA3	GH	GH31	Strep. parasanguinis
contig_1_821	AGL64020.2|AA10	8408OA3	AA	AA10	Strep. parasanguinis
contig_1_842	QEW10371.1|GH1	8408OA3	GH	GH1	Strep. parasanguinis
contig_1_845	QBQ55156.1|CBM50	8408OA3	CBM	CBM50	Strep. parasanguinis
contig_1_857	BBF72686.1|GT2	8408OA3	GT	GT2	Strep. parasanguinis
contig_1_915	CAD7226128.1|GH38	8408OA3	GH	GH38	Strep. parasanguinis
contig_1_943	QLF55758.1|GH66	8408OA3	GH	GH66	Strep. parasanguinis
contig_1_952	CAI32748.2|GT4	8408OA3	GT	GT4	Strep. parasanguinis
contig_1_967	CAN80640.1|GT47	8408OA3	GT	GT47	Strep. parasanguinis
contig_1_980	AGL63717.2|GT4	8408OA3	GT	GT4	Strep. parasanguinis
contig_1_982	AEH56390.1|GH29	8408OA3	GH	GH29	Strep. parasanguinis
contig_1_983	QEW10528.1|CBM71|GH2	8408OA3	CBM	CBM71	Strep. parasanguinis
contig_1_983	QEW10528.1|CBM71|GH2	8408OA3	GH	GH2	Strep. parasanguinis
contig_1_992	QEW10539.1|GT51	8408OA3	GT	GT51	Strep. parasanguinis
contig_1_994	AEH56405.1|GH25	8408OA3	GH	GH25	Strep. parasanguinis
contig_1_997	QTF54836.1|GT0	8408OA3	GT	GT0	Strep. parasanguinis
contig_1_998	AFJ26944.1|GT2	8408OA3	GT	GT2	Strep. parasanguinis
contig_1_1000	AEH56411.1|GT4	8408OA3	GT	GT4	Strep. parasanguinis
contig_1_1001	AFJ26947.1|GT2	8408OA3	GT	GT2	Strep. parasanguinis
contig_1_1003	AEH56414.1|GT26	8408OA3	GT	GT26	Strep. parasanguinis
contig_1_1038	AFJ26982.1|GT35	8408OA3	GT	GT35	Strep. parasanguinis
contig_1_1039	QEW10587.1|GH77	8408OA3	GH	GH77	Strep. parasanguinis
contig_1_1040	CCO11983.2|CBM50|CE4	8408OA3	CBM	CBM50	Strep. parasanguinis
contig_1_1040	CCO11983.2|CBM50|CE4	8408OA3	CE	CE4	Strep. parasanguinis
contig_1_1041	AGL62895.2|GH13	8408OA3	GH	GH13	Strep. parasanguinis
contig_1_1045	QEW10592.1|CBM48|CBM68|GH13_14	8408OA3	CBM	CBM48	Strep. parasanguinis
contig_1_1045	QEW10592.1|CBM48|CBM68|GH13_14	8408OA3	CBM	CBM68	Strep. parasanguinis
contig_1_1045	QEW10592.1|CBM48|CBM68|GH13_14	8408OA3	GH	GH13_14	Strep. parasanguinis
contig_1_1047	ALR08738.2|GT83	8408OA3	GT	GT83	Strep. parasanguinis
contig_1_1124	CCO12102.2|GH13_31	8408OA3	GH	GH13_31	Strep. parasanguinis
contig_1_1127	QYU66396.1|GH13_23	8408OA3	GH	GH13_23	Strep. parasanguinis
contig_1_1136	VED66297.1|GH35	8408OA3	GH	GH35	Strep. parasanguinis
contig_1_1171	QWU85921.1|GH130	8408OA3	GH	GH130	Strep. parasanguinis
contig_1_1173	QWL81888.1|CBM50	8408OA3	CBM	CBM50	Strep. parasanguinis
contig_1_1201	WAO96723.1|GH0	8408OA3	GH	GH0	Strep. parasanguinis
contig_1_1216	AFJ25141.1|GH29	8408OA3	GH	GH29	Strep. parasanguinis
contig_1_1264	QEW08942.1|GT51	8408OA3	GT	GT51	Strep. parasanguinis
contig_1_1266	CCO12868.2|GH1	8408OA3	GH	GH1	Strep. parasanguinis
contig_1_1298	QYO62262.1|GH13	8408OA3	GH	GH13	Strep. parasanguinis
contig_1_1325	CUS04921.2|GT4	8408OA3	GT	GT4	Strep. parasanguinis
contig_1_1335	AEH56762.1|GH1	8408OA3	GH	GH1	Strep. parasanguinis
contig_1_1352	AGL63717.2|GT4	8408OA3	GT	GT4	Strep. parasanguinis
contig_1_1358	AGL64353.2|CBM50|GH25	8408OA3	CBM	CBM50	Strep. parasanguinis
contig_1_1358	AGL64353.2|CBM50|GH25	8408OA3	GH	GH25	Strep. parasanguinis
contig_1_1392	CAD7252417.1|GH13	8408OA3	GH	GH13	Strep. parasanguinis
contig_1_1400	AEH56829.1|GH13_31	8408OA3	GH	GH13_31	Strep. parasanguinis
contig_1_1409	QEW08839.1|GH73	8408OA3	GH	GH73	Strep. parasanguinis
contig_1_1539	AGL64345.2|GT2	8408OA3	GT	GT2	Strep. parasanguinis
contig_1_1542	QEW09192.1|CE9	8408OA3	CE	CE9	Strep. parasanguinis
contig_1_1549	AWK41767.1|GH13_3	8408OA3	GH	GH13_3	Strep. parasanguinis
contig_1_1563	QEW09214.1|GT51	8408OA3	GT	GT51	Strep. parasanguinis
contig_1_1598	CAG7911095.1|GH5_11	8408OA3	GH	GH5_11	Strep. parasanguinis
contig_1_1638	QEW09291.1|GT28	8408OA3	GT	GT28	Strep. parasanguinis
contig_1_1650	AGL63717.2|GT4	8408OA3	GT	GT4	Strep. parasanguinis
contig_1_1655	AEH55108.1|GH32	8408OA3	GH	GH32	Strep. parasanguinis
contig_1_1657	CCO11632.2|GH3	8408OA3	GH	GH3	Strep. parasanguinis
contig_1_1672	CCO12633.2|GH84	8408OA3	GH	GH84	Strep. parasanguinis
contig_1_1736	AGL63702.2|GT4	8408OA3	GT	GT4	Strep. parasanguinis
contig_1_1807	VED65856.1|GH25	8408OA3	GH	GH25	Strep. parasanguinis
contig_1_1815	QUI22575.1|CBM50	8408OA3	CBM	CBM50	Strep. parasanguinis
contig_1_1825	QEW09479.1|CBM48|GH13_9	8408OA3	CBM	CBM48	Strep. parasanguinis
contig_1_1825	QEW09479.1|CBM48|GH13_9	8408OA3	GH	GH13_9	Strep. parasanguinis
contig_1_1826	BBM21727.1|GH13_9	8408OA3	GH	GH13_9	Strep. parasanguinis
contig_1_1828	QEW09482.1|GT5	8408OA3	GT	GT5	Strep. parasanguinis
contig_1_1836	CAD7245033.1|GT58	8408OA3	GT	GT58	Strep. parasanguinis
contig_1_1903	AEH55314.1|CE4	8408OA3	CE	CE4	Strep. parasanguinis
contig_1_1906	QEW09557.1|GT2	8408OA3	GT	GT2	Strep. parasanguinis
contig_1_1911	QBS00189.1|GT2	8408OA3	GT	GT2	Strep. parasanguinis
contig_1_1912	QBS00413.1|GT2	8408OA3	GT	GT2	Strep. parasanguinis
contig_1_1913	AGY38433.1|GT2	8408OA3	GT	GT2	Strep. parasanguinis
contig_1_1915	AFJ25828.1|GT2	8408OA3	GT	GT2	Strep. parasanguinis
contig_1_1917	QUB39726.1|GT2|GT4	8408OA3	GT	GT2	Strep. parasanguinis
contig_1_1917	QUB39726.1|GT2|GT4	8408OA3	GT	GT4	Strep. parasanguinis
contig_1_1919	AGY38427.1|GT4	8408OA3	GT	GT4	Strep. parasanguinis
contig_1_1920	SQH66675.1|GT4	8408OA3	GT	GT4	Strep. parasanguinis
contig_1_1921	SQH66674.1|GT2	8408OA3	GT	GT2	Strep. parasanguinis
contig_1_1947	AEH55353.1|CBM41|CBM48|GH13_14	8408OA3	CBM	CBM41	Strep. parasanguinis
contig_1_1947	AEH55353.1|CBM41|CBM48|GH13_14	8408OA3	CBM	CBM48	Strep. parasanguinis
contig_1_1947	AEH55353.1|CBM41|CBM48|GH13_14	8408OA3	GH	GH13_14	Strep. parasanguinis
contig_1_1956	CCO09729.2|GH1	8408OA3	GH	GH1	Strep. parasanguinis
contig_1_1984	AEH55398.1|CBM34|GH13_20	8408OA3	CBM	CBM34	Strep. parasanguinis
contig_1_1984	AEH55398.1|CBM34|GH13_20	8408OA3	GH	GH13_20	Strep. parasanguinis
contig_2_3	QEW08839.1|GH73	8408OA3	GH	GH73	Strep. parasanguinis
contig_1_15	ATF56915.1|GH73	8420OA2	GH	GH73	Strep. oralis
contig_1_52	QUI22575.1|CBM50	8420OA2	CBM	CBM50	Strep. oralis
contig_1_63	ANR76253.1|GT4	8420OA2	GT	GT4	Strep. oralis
contig_1_64	ATF56871.1|GT4	8420OA2	GT	GT4	Strep. oralis
contig_1_105	CAD7245033.1|GT58	8420OA2	GT	GT58	Strep. oralis
contig_1_117	ATF56822.1|GH25	8420OA2	GH	GH25	Strep. oralis
contig_1_142	QLL95844.1|GH1	8420OA2	GH	GH1	Strep. oralis
contig_1_168	AGL64700.2|GH23	8420OA2	GH	GH23	Strep. oralis
contig_1_172	AMJ20543.1|GH13_11	8420OA2	GH	GH13_11	Strep. oralis
contig_1_174	AHZ47760.1|GH23	8420OA2	GH	GH23	Strep. oralis
contig_1_186	QCZ57746.1|GH1	8420OA2	GH	GH1	Strep. oralis
contig_1_190	QCZ58656.1|GH13_18	8420OA2	GH	GH13_18	Strep. oralis
contig_1_208	AQA08813.1|CBM34|GH13_20	8420OA2	CBM	CBM34	Strep. oralis
contig_1_208	AQA08813.1|CBM34|GH13_20	8420OA2	GH	GH13_20	Strep. oralis
contig_1_269	CCO12112.2|GH13_31	8420OA2	GH	GH13_31	Strep. oralis
contig_1_273	VEF79047.1|GT5	8420OA2	GT	GT5	Strep. oralis
contig_1_275	BBM21727.1|GH13_9	8420OA2	GH	GH13_9	Strep. oralis
contig_1_276	AQA07841.1|CBM48|GH13_9	8420OA2	CBM	CBM48	Strep. oralis
contig_1_276	AQA07841.1|CBM48|GH13_9	8420OA2	GH	GH13_9	Strep. oralis
contig_1_278	ANR75907.1|CBM41|CBM48|GH13_14	8420OA2	CBM	CBM41	Strep. oralis
contig_1_278	ANR75907.1|CBM41|CBM48|GH13_14	8420OA2	CBM	CBM48	Strep. oralis
contig_1_278	ANR75907.1|CBM41|CBM48|GH13_14	8420OA2	GH	GH13_14	Strep. oralis
contig_1_284	BEI59196.1|GH130_1	8420OA2	GH	GH130_1	Strep. oralis
contig_1_289	CCO11994.2|GT4	8420OA2	GT	GT4	Strep. oralis
contig_1_353	CAE6204650.1|GH28	8420OA2	GH	GH28	Strep. oralis
contig_1_360	CCO11632.2|GH3	8420OA2	GH	GH3	Strep. oralis
contig_1_404	CCO12633.2|GH84	8420OA2	GH	GH84	Strep. oralis
contig_1_428	BBF72686.1|GT2	8420OA2	GT	GT2	Strep. oralis
contig_1_446	AQA08213.1|GT2	8420OA2	GT	GT2	Strep. oralis
contig_1_451	CCO09729.2|GH1	8420OA2	GH	GH1	Strep. oralis
contig_1_459	ANR76134.1|GH13_5	8420OA2	GH	GH13_5	Strep. oralis
contig_2_10	CAD7226128.1|GH38	8420OA2	GH	GH38	Strep. oralis
contig_2_23	AGL63717.2|GT4	8420OA2	GT	GT4	Strep. oralis
contig_2_26	AQA07989.1|GH13_31	8420OA2	GH	GH13_31	Strep. oralis
contig_2_34	ANR75289.1|GT4	8420OA2	GT	GT4	Strep. oralis
contig_2_35	ANR75290.1|GT4	8420OA2	GT	GT4	Strep. oralis
contig_2_37	ANR75292.1|GT2	8420OA2	GT	GT2	Strep. oralis
contig_2_41	ATF57315.1|GT113	8420OA2	GT	GT113	Strep. oralis
contig_2_42	QAY63367.1|GT2	8420OA2	GT	GT2	Strep. oralis
contig_2_46	QLL96372.1|CBM32|GH101	8420OA2	CBM	CBM32	Strep. oralis
contig_2_46	QLL96372.1|CBM32|GH101	8420OA2	GH	GH101	Strep. oralis
contig_2_47	QQK99918.1|CBM32|GH20|GH84	8420OA2	CBM	CBM32	Strep. oralis
contig_2_47	QQK99918.1|CBM32|GH20|GH84	8420OA2	GH	GH20	Strep. oralis
contig_2_47	QQK99918.1|CBM32|GH20|GH84	8420OA2	GH	GH84	Strep. oralis
contig_2_48	QXW61149.1|GT51	8420OA2	GT	GT51	Strep. oralis
contig_2_54	CBA03971.1|GT30	8420OA2	GT	GT30	Strep. oralis
contig_2_103	AGL63702.2|GT4	8420OA2	GT	GT4	Strep. oralis
contig_2_137	AHZ48259.1|GH32	8420OA2	GH	GH32	Strep. oralis
contig_2_138	AGL62906.2|GH13_31	8420OA2	GH	GH13_31	Strep. oralis
contig_2_155	CAD7252417.1|GH13	8420OA2	GH	GH13	Strep. oralis
contig_2_181	CAN65674.1|GH28	8420OA2	GH	GH28	Strep. oralis
contig_2_194	CBZ01132.1|CBM50	8420OA2	CBM	CBM50	Strep. oralis
contig_2_259	ATF57101.1|GT28	8420OA2	GT	GT28	Strep. oralis
contig_2_280	QBQ55156.1|CBM50	8420OA2	CBM	CBM50	Strep. oralis
contig_2_285	ALD67832.1|GH1	8420OA2	GH	GH1	Strep. oralis
contig_2_298	CCO10293.2|CBM50	8420OA2	CBM	CBM50	Strep. oralis
contig_2_315	AGL63717.2|GT4	8420OA2	GT	GT4	Strep. oralis
contig_2_327	CBZ01001.1|GH70	8420OA2	GH	GH70	Strep. oralis
contig_2_331	QLL96087.1|CE4	8420OA2	CE	CE4	Strep. oralis
contig_3_8	CCO12868.2|GH1	8420OA2	GH	GH1	Strep. oralis
contig_3_10	QRO08163.1|CBM41|CBM48|GH13_12	8420OA2	CBM	CBM41	Strep. oralis
contig_3_10	QRO08163.1|CBM41|CBM48|GH13_12	8420OA2	CBM	CBM48	Strep. oralis
contig_3_10	QRO08163.1|CBM41|CBM48|GH13_12	8420OA2	GH	GH13_12	Strep. oralis
contig_3_27	AHZ48494.1|GH1	8420OA2	GH	GH1	Strep. oralis
contig_3_28	AGL64353.2|CBM50|GH25	8420OA2	CBM	CBM50	Strep. oralis
contig_3_28	AGL64353.2|CBM50|GH25	8420OA2	GH	GH25	Strep. oralis
contig_3_36	CUS04921.2|GT4	8420OA2	GT	GT4	Strep. oralis
contig_3_82	QRO08088.1|GT1	8420OA2	GT	GT1	Strep. oralis
contig_3_103	CUS05224.2|CE14	8420OA2	CE	CE14	Strep. oralis
contig_3_147	ATF57507.1|GT2	8420OA2	GT	GT2	Strep. oralis
contig_3_161	URK67199.1|GH20	8420OA2	GH	GH20	Strep. oralis
contig_3_163	QLL96706.1|GH38	8420OA2	GH	GH38	Strep. oralis
contig_3_164	UTX67326.1|GH125	8420OA2	GH	GH125	Strep. oralis
contig_3_165	ANR75087.1|GH92	8420OA2	GH	GH92	Strep. oralis
contig_3_166	ANR76220.1|GH29	8420OA2	GH	GH29	Strep. oralis
contig_3_187	AGL63717.2|GT4	8420OA2	GT	GT4	Strep. oralis
contig_4_1	VEF79601.1|CBM32|GH85	8420OA2	CBM	CBM32	Strep. oralis
contig_4_1	VEF79601.1|CBM32|GH85	8420OA2	GH	GH85	Strep. oralis
contig_4_20	ANR74720.1|GH13_29	8420OA2	GH	GH13_29	Strep. oralis
contig_4_21	QCH95999.1|GH13_29	8420OA2	GH	GH13_29	Strep. oralis
contig_4_23	ATF56076.1|GH95	8420OA2	GH	GH95	Strep. oralis
contig_4_33	UTX65909.1|GH29	8420OA2	GH	GH29	Strep. oralis
contig_4_63	CCO11681.2|GH25	8420OA2	GH	GH25	Strep. oralis
contig_5_19	AGJ84236.1|GT2	8420OA2	GT	GT2	Strep. oralis
contig_5_43	ANR74471.1|GT2	8420OA2	GT	GT2	Strep. oralis
contig_5_44	QBQ55251.1|CBM50	8420OA2	CBM	CBM50	Strep. oralis
contig_5_57	WEA13229.1|GT0	8420OA2	GT	GT0	Strep. oralis
contig_5_61	ATF56360.1|GT2	8420OA2	GT	GT2	Strep. oralis
contig_5_62	UNV68046.1|GH8	8420OA2	GH	GH8	Strep. oralis
contig_5_67	CCO11054.2|CBM50	8420OA2	CBM	CBM50	Strep. oralis
contig_5_84	AWK41767.1|GH13_3	8420OA2	GH	GH13_3	Strep. oralis
contig_6_47	ATF57787.1|CBM40|GH33	8420OA2	CBM	CBM40	Strep. oralis
contig_6_47	ATF57787.1|CBM40|GH33	8420OA2	GH	GH33	Strep. oralis
contig_6_48	ATF56261.1|CE7	8420OA2	CE	CE7	Strep. oralis
contig_7_27	ATF57648.1|GH35	8420OA2	GH	GH35	Strep. oralis
contig_7_29	VEF78162.1|GH20	8420OA2	GH	GH20	Strep. oralis
contig_7_39	QYU66396.1|GH13_23	8420OA2	GH	GH13_23	Strep. oralis
contig_7_42	CCO12102.2|GH13_31	8420OA2	GH	GH13_31	Strep. oralis
contig_7_66	CAN80640.1|GT47	8420OA2	GT	GT47	Strep. oralis
contig_8_15	CAI32748.2|GT4	8420OA2	GT	GT4	Strep. oralis
contig_8_25	AHZ46965.1|GT51	8420OA2	GT	GT51	Strep. oralis
contig_8_30	QLL96516.1|GT35	8420OA2	GT	GT35	Strep. oralis
contig_8_31	QLL96517.1|GH77	8420OA2	GH	GH77	Strep. oralis
contig_8_32	CCO11983.2|CBM50|CE4	8420OA2	CBM	CBM50	Strep. oralis
contig_8_32	CCO11983.2|CBM50|CE4	8420OA2	CE	CE4	Strep. oralis
contig_8_33	AGL62895.2|GH13	8420OA2	GH	GH13	Strep. oralis
contig_8_38	ALR08738.2|GT83	8420OA2	GT	GT83	Strep. oralis
contig_8_48	WAO96723.1|GH0	8420OA2	GH	GH0	Strep. oralis
contig_9_43	AGL64020.2|AA10	8420OA2	AA	AA10	Strep. oralis
contig_9_53	ANR74643.1|GH13_18	8420OA2	GH	GH13_18	Strep. oralis
contig_9_57	ATF56160.1|GH36	8420OA2	GH	GH36	Strep. oralis
contig_10_4	QLL97614.1|GT51	8420OA2	GT	GT51	Strep. oralis
contig_12_23	AGL64345.2|GT2	8420OA2	GT	GT2	Strep. oralis
contig_12_33	CAG7911095.1|GH5_11	8420OA2	GH	GH5_11	Strep. oralis
contig_12_44	QYO62262.1|GH13	8420OA2	GH	GH13	Strep. oralis
contig_13_16	ANR76178.1|CBM71|GH2	8420OA2	CBM	CBM71	Strep. oralis
contig_13_16	ANR76178.1|CBM71|GH2	8420OA2	GH	GH2	Strep. oralis
contig_17_11	AGL63871.2|GT2	8420OA2	GT	GT2	Strep. oralis
contig_18_2	VEF78250.1|CE9	8420OA2	CE	CE9	Strep. oralis
contig_18_9	BAV79148.1|CBM50	8420OA2	CBM	CBM50	Strep. oralis
contig_19_8	QQL00520.1|CBM32|GH85	8420OA2	CBM	CBM32	Strep. oralis
contig_19_8	QQL00520.1|CBM32|GH85	8420OA2	GH	GH85	Strep. oralis
contig_1_26	CCO12102.2|GH13_31	8420OA3	GH	GH13_31	Strep. hominis
contig_1_29	QYU66396.1|GH13_23	8420OA3	GH	GH13_23	Strep. hominis
contig_1_47	VED98470.1|GH35	8420OA3	GH	GH35	Strep. hominis
contig_1_80	QWU85921.1|GH130	8420OA3	GH	GH130	Strep. hominis
contig_1_98	QBQ55156.1|CBM50	8420OA3	CBM	CBM50	Strep. hominis
contig_1_101	QOG25468.1|GT51	8420OA3	GT	GT51	Strep. hominis
contig_1_192	AZQ41124.1|GT51	8420OA3	GT	GT51	Strep. hominis
contig_1_194	CCO12868.2|GH1	8420OA3	GH	GH1	Strep. hominis
contig_1_197	AIK78492.1|CBM50	8420OA3	CBM	CBM50	Strep. hominis
contig_1_212	AGL63717.2|GT4	8420OA3	GT	GT4	Strep. hominis
contig_1_227	AGL64353.2|CBM50|GH25	8420OA3	CBM	CBM50	Strep. hominis
contig_1_227	AGL64353.2|CBM50|GH25	8420OA3	GH	GH25	Strep. hominis
contig_1_247	QYO62262.1|GH13	8420OA3	GH	GH13	Strep. hominis
contig_1_268	CUS04921.2|GT4	8420OA3	GT	GT4	Strep. hominis
contig_1_306	AGL64345.2|GT2	8420OA3	GT	GT2	Strep. hominis
contig_1_310	AIK78381.1|CE9	8420OA3	CE	CE9	Strep. hominis
contig_1_368	QXF33454.1|GH13_3	8420OA3	GH	GH13_3	Strep. hominis
contig_1_372	VEE11479.1|GT51	8420OA3	GT	GT51	Strep. hominis
contig_1_384	ALR09732.2|GH92	8420OA3	GH	GH92	Strep. hominis
contig_1_405	CAG7911095.1|GH5_11	8420OA3	GH	GH5_11	Strep. hominis
contig_1_429	QOG25221.1|GT28	8420OA3	GT	GT28	Strep. hominis
contig_1_442	AGL65524.2|GH36	8420OA3	GH	GH36	Strep. hominis
contig_1_445	QCH95999.1|GH13_29	8420OA3	GH	GH13_29	Strep. hominis
contig_1_446	AZQ41344.1|GH13_29	8420OA3	GH	GH13_29	Strep. hominis
contig_1_449	CCO11054.2|CBM50	8420OA3	CBM	CBM50	Strep. hominis
contig_1_463	CCO10293.2|CBM50	8420OA3	CBM	CBM50	Strep. hominis
contig_1_488	ALL03576.1|GT8	8420OA3	GT	GT8	Strep. hominis
contig_1_499	CBA03971.1|GT30	8420OA3	GT	GT30	Strep. hominis
contig_1_551	AGL63717.2|GT4	8420OA3	GT	GT4	Strep. hominis
contig_1_563	CCO11632.2|GH3	8420OA3	GH	GH3	Strep. hominis
contig_1_589	AGL63702.2|GT4	8420OA3	GT	GT4	Strep. hominis
contig_1_604	QOG24464.1|GH1	8420OA3	GH	GH1	Strep. hominis
contig_1_607	ALL03400.1|CBM61|GH53	8420OA3	CBM	CBM61	Strep. hominis
contig_1_607	ALL03400.1|CBM61|GH53	8420OA3	GH	GH53	Strep. hominis
contig_1_645	CAN65674.1|GH28	8420OA3	GH	GH28	Strep. hominis
contig_1_669	AGU81947.1|GH25	8420OA3	GH	GH25	Strep. hominis
contig_1_676	VEE12775.1|GH25	8420OA3	GH	GH25	Strep. hominis
contig_1_694	CCO09729.2|GH1	8420OA3	GH	GH1	Strep. hominis
contig_1_702	BEI59196.1|GH130_1	8420OA3	GH	GH130_1	Strep. hominis
contig_1_800	CCO11994.2|GT4	8420OA3	GT	GT4	Strep. hominis
contig_1_802	BEI59196.1|GH130_1	8420OA3	GH	GH130_1	Strep. hominis
contig_1_846	QOG24631.1|GH13_5	8420OA3	GH	GH13_5	Strep. hominis
contig_1_874	CCO12112.2|GH13_31	8420OA3	GH	GH13_31	Strep. hominis
contig_1_932	AIK77816.1|GH23	8420OA3	GH	GH23	Strep. hominis
contig_1_934	AMJ20543.1|GH13_11	8420OA3	GH	GH13_11	Strep. hominis
contig_1_937	AGL64700.2|GH23	8420OA3	GH	GH23	Strep. hominis
contig_1_981	ALL02969.1|CBM41|CBM48|GH13_14	8420OA3	CBM	CBM41	Strep. hominis
contig_1_981	ALL02969.1|CBM41|CBM48|GH13_14	8420OA3	CBM	CBM48	Strep. hominis
contig_1_981	ALL02969.1|CBM41|CBM48|GH13_14	8420OA3	GH	GH13_14	Strep. hominis
contig_1_1067	AIK77941.1|GH73	8420OA3	GH	GH73	Strep. hominis
contig_1_1100	CAG7883609.1|GT1	8420OA3	GT	GT1	Strep. hominis
contig_1_1108	CAE6204650.1|GH28	8420OA3	GH	GH28	Strep. hominis
contig_1_1115	VEE12153.1|CE4	8420OA3	CE	CE4	Strep. hominis
contig_1_1169	ANW84915.1|GT4	8420OA3	GT	GT4	Strep. hominis
contig_1_1170	ANW84914.1|GT4	8420OA3	GT	GT4	Strep. hominis
contig_1_1174	SQH66670.1|GT0	8420OA3	GT	GT0	Strep. hominis
contig_1_1175	QOG24993.1|GT4	8420OA3	GT	GT4	Strep. hominis
contig_1_1178	VED97939.1|GT2	8420OA3	GT	GT2	Strep. hominis
contig_1_1179	AGU81417.1|GT4	8420OA3	GT	GT4	Strep. hominis
contig_1_1181	VED97942.1|GT2	8420OA3	GT	GT2	Strep. hominis
contig_1_1184	UTX65187.1|GT2	8420OA3	GT	GT2	Strep. hominis
contig_1_1187	VED97947.1|GT2	8420OA3	GT	GT2	Strep. hominis
contig_1_1192	QAY63367.1|GT2	8420OA3	GT	GT2	Strep. hominis
contig_1_1210	CAD7245033.1|GT58	8420OA3	GT	GT58	Strep. hominis
contig_1_1217	AIK78086.1|GT35	8420OA3	GT	GT35	Strep. hominis
contig_1_1218	ANW84861.1|GT5	8420OA3	GT	GT5	Strep. hominis
contig_1_1220	BBM21727.1|GH13_9	8420OA3	GH	GH13_9	Strep. hominis
contig_1_1221	ANW84858.1|CBM48|GH13_9	8420OA3	CBM	CBM48	Strep. hominis
contig_1_1221	ANW84858.1|CBM48|GH13_9	8420OA3	GH	GH13_9	Strep. hominis
contig_1_1225	CCO11681.2|GH25	8420OA3	GH	GH25	Strep. hominis
contig_1_1255	QBQ55251.1|CBM50	8420OA3	CBM	CBM50	Strep. hominis
contig_1_1271	QUI22575.1|CBM50	8420OA3	CBM	CBM50	Strep. hominis
contig_1_1274	BBD22268.1|GH1	8420OA3	GH	GH1	Strep. hominis
contig_1_1304	AGL63871.2|GT2	8420OA3	GT	GT2	Strep. hominis
contig_1_1339	CCO12633.2|GH84	8420OA3	GH	GH84	Strep. hominis
contig_1_1372	ALR08738.2|GT83	8420OA3	GT	GT83	Strep. hominis
contig_1_1389	AIK77204.1|GH1	8420OA3	GH	GH1	Strep. hominis
contig_1_1397	AOG60880.1|GH32	8420OA3	GH	GH32	Strep. hominis
contig_1_1398	VEE13020.1|GH32	8420OA3	GH	GH32	Strep. hominis
contig_1_1427	VED98896.1|GH8	8420OA3	GH	GH8	Strep. hominis
contig_1_1428	VED98895.1|GT2	8420OA3	GT	GT2	Strep. hominis
contig_1_1430	WEA13229.1|GT0	8420OA3	GT	GT0	Strep. hominis
contig_1_1466	CAD7252417.1|GH13	8420OA3	GH	GH13	Strep. hominis
contig_1_1493	UGQ07276.1|CBM41|CBM48|GH13_12	8420OA3	CBM	CBM41	Strep. hominis
contig_1_1493	UGQ07276.1|CBM41|CBM48|GH13_12	8420OA3	CBM	CBM48	Strep. hominis
contig_1_1493	UGQ07276.1|CBM41|CBM48|GH13_12	8420OA3	GH	GH13_12	Strep. hominis
contig_1_1514	BBD21966.1|GT2	8420OA3	GT	GT2	Strep. hominis
contig_1_1519	VEE13173.1|GH1	8420OA3	GH	GH1	Strep. hominis
contig_1_1530	ALL03744.1|GH1	8420OA3	GH	GH1	Strep. hominis
contig_1_1533	ARC26066.1|GH25	8420OA3	GH	GH25	Strep. hominis
contig_1_1541	ANW85876.1|GH1	8420OA3	GH	GH1	Strep. hominis
contig_1_1556	BBF72686.1|GT2	8420OA3	GT	GT2	Strep. hominis
contig_1_1574	CAI32748.2|GT4	8420OA3	GT	GT4	Strep. hominis
contig_1_1583	CAD7226128.1|GH38	8420OA3	GH	GH38	Strep. hominis
contig_1_1608	CAN80640.1|GT47	8420OA3	GT	GT47	Strep. hominis
contig_1_1617	AGL63717.2|GT4	8420OA3	GT	GT4	Strep. hominis
contig_1_1668	AGU82419.1|GT113	8420OA3	GT	GT113	Strep. hominis
contig_1_1674	ALL03893.1|GT2	8420OA3	GT	GT2	Strep. hominis
contig_1_1675	AGU82426.1|GT2	8420OA3	GT	GT2	Strep. hominis
contig_1_1677	AGU82427.1|GT4	8420OA3	GT	GT4	Strep. hominis
contig_1_1678	AGU82428.1|GT4	8420OA3	GT	GT4	Strep. hominis
contig_1_1712	VTS48643.1|GT35	8420OA3	GT	GT35	Strep. hominis
contig_1_1713	AGU84429.1|GH77	8420OA3	GH	GH77	Strep. hominis
contig_1_1714	CCO11983.2|CBM50|CE4	8420OA3	CBM	CBM50	Strep. hominis
contig_1_1714	CCO11983.2|CBM50|CE4	8420OA3	CE	CE4	Strep. hominis
contig_1_1715	AGL62895.2|GH13	8420OA3	GH	GH13	Strep. hominis
contig_1_1719	AIK76885.1|CBM48|CBM68|GH13_14	8420OA3	CBM	CBM48	Strep. hominis
contig_1_1719	AIK76885.1|CBM48|CBM68|GH13_14	8420OA3	CBM	CBM68	Strep. hominis
contig_1_1719	AIK76885.1|CBM48|CBM68|GH13_14	8420OA3	GH	GH13_14	Strep. hominis
contig_1_1721	ALR08738.2|GT83	8420OA3	GT	GT83	Strep. hominis
contig_1_1759	AGU82512.1|CBM50	8420OA3	CBM	CBM50	Strep. hominis
contig_1_1763	ANW86140.1|CBM50|GH23	8420OA3	CBM	CBM50	Strep. hominis
contig_1_1763	ANW86140.1|CBM50|GH23	8420OA3	GH	GH23	Strep. hominis
contig_1_63	ALR08738.2|GT83	8421A4	GT	GT83	Strep. parasanguinis
contig_1_65	AFJ26990.1|CBM48|CBM68|GH13_14	8421A4	CBM	CBM48	Strep. parasanguinis
contig_1_65	AFJ26990.1|CBM48|CBM68|GH13_14	8421A4	CBM	CBM68	Strep. parasanguinis
contig_1_65	AFJ26990.1|CBM48|CBM68|GH13_14	8421A4	GH	GH13_14	Strep. parasanguinis
contig_1_69	AGL62895.2|GH13	8421A4	GH	GH13	Strep. parasanguinis
contig_1_70	CCO11983.2|CBM50|CE4	8421A4	CBM	CBM50	Strep. parasanguinis
contig_1_70	CCO11983.2|CBM50|CE4	8421A4	CE	CE4	Strep. parasanguinis
contig_1_71	AEH56449.1|GH77	8421A4	GH	GH77	Strep. parasanguinis
contig_1_72	AFJ26982.1|GT35	8421A4	GT	GT35	Strep. parasanguinis
contig_1_107	AEH56414.1|GT26	8421A4	GT	GT26	Strep. parasanguinis
contig_1_109	AFJ26947.1|GT2	8421A4	GT	GT2	Strep. parasanguinis
contig_1_110	AEH56411.1|GT4	8421A4	GT	GT4	Strep. parasanguinis
contig_1_112	AFJ26944.1|GT2	8421A4	GT	GT2	Strep. parasanguinis
contig_1_113	QTF54836.1|GT0	8421A4	GT	GT0	Strep. parasanguinis
contig_1_116	QWL83937.1|GH25	8421A4	GH	GH25	Strep. parasanguinis
contig_1_118	QEW10539.1|GT51	8421A4	GT	GT51	Strep. parasanguinis
contig_1_128	AFJ26926.1|CBM71|GH2	8421A4	CBM	CBM71	Strep. parasanguinis
contig_1_128	AFJ26926.1|CBM71|GH2	8421A4	GH	GH2	Strep. parasanguinis
contig_1_129	AEH56390.1|GH29	8421A4	GH	GH29	Strep. parasanguinis
contig_1_131	AGL63717.2|GT4	8421A4	GT	GT4	Strep. parasanguinis
contig_1_144	CAN80640.1|GT47	8421A4	GT	GT47	Strep. parasanguinis
contig_1_159	CAI32748.2|GT4	8421A4	GT	GT4	Strep. parasanguinis
contig_1_169	QLF55758.1|GH66	8421A4	GH	GH66	Strep. parasanguinis
contig_1_197	CAD7226128.1|GH38	8421A4	GH	GH38	Strep. parasanguinis
contig_1_263	QEW08839.1|GH73	8421A4	GH	GH73	Strep. parasanguinis
contig_1_302	BBF72686.1|GT2	8421A4	GT	GT2	Strep. parasanguinis
contig_2_47	CAD7245033.1|GT58	8421A4	GT	GT58	Strep. parasanguinis
contig_2_55	QEW09482.1|GT5	8421A4	GT	GT5	Strep. parasanguinis
contig_2_57	BBM21727.1|GH13_9	8421A4	GH	GH13_9	Strep. parasanguinis
contig_2_58	QEW09479.1|CBM48|GH13_9	8421A4	CBM	CBM48	Strep. parasanguinis
contig_2_58	QEW09479.1|CBM48|GH13_9	8421A4	GH	GH13_9	Strep. parasanguinis
contig_2_69	QUI22575.1|CBM50	8421A4	CBM	CBM50	Strep. parasanguinis
contig_2_98	AGL63702.2|GT4	8421A4	GT	GT4	Strep. parasanguinis
contig_2_168	CCO12633.2|GH84	8421A4	GH	GH84	Strep. parasanguinis
contig_2_183	CCO11632.2|GH3	8421A4	GH	GH3	Strep. parasanguinis
contig_2_185	AEH55108.1|GH32	8421A4	GH	GH32	Strep. parasanguinis
contig_2_190	AGL63717.2|GT4	8421A4	GT	GT4	Strep. parasanguinis
contig_2_202	QEW09291.1|GT28	8421A4	GT	GT28	Strep. parasanguinis
contig_2_243	CAG7911095.1|GH5_11	8421A4	GH	GH5_11	Strep. parasanguinis
contig_3_13	AEH56657.1|GH92	8421A4	GH	GH92	Strep. parasanguinis
contig_3_14	QWL81973.1|GH125	8421A4	GH	GH125	Strep. parasanguinis
contig_3_15	AEH56659.1|GH38	8421A4	GH	GH38	Strep. parasanguinis
contig_3_17	AFJ25282.1|GH20	8421A4	GH	GH20	Strep. parasanguinis
contig_3_30	QEW08942.1|GT51	8421A4	GT	GT51	Strep. parasanguinis
contig_3_32	CCO12868.2|GH1	8421A4	GH	GH1	Strep. parasanguinis
contig_3_64	QYO62262.1|GH13	8421A4	GH	GH13	Strep. parasanguinis
contig_3_115	CUS04921.2|GT4	8421A4	GT	GT4	Strep. parasanguinis
contig_3_127	AEH56762.1|GH1	8421A4	GH	GH1	Strep. parasanguinis
contig_3_137	AGL63717.2|GT4	8421A4	GT	GT4	Strep. parasanguinis
contig_3_143	AGL64353.2|CBM50|GH25	8421A4	CBM	CBM50	Strep. parasanguinis
contig_3_143	AGL64353.2|CBM50|GH25	8421A4	GH	GH25	Strep. parasanguinis
contig_3_173	CAD7252417.1|GH13	8421A4	GH	GH13	Strep. parasanguinis
contig_3_181	AEH56829.1|GH13_31	8421A4	GH	GH13_31	Strep. parasanguinis
contig_4_11	QBQ55156.1|CBM50	8421A4	CBM	CBM50	Strep. parasanguinis
contig_4_14	QEW10371.1|GH1	8421A4	GH	GH1	Strep. parasanguinis
contig_4_34	AGL64020.2|AA10	8421A4	AA	AA10	Strep. parasanguinis
contig_4_50	AEH56192.1|GH31	8421A4	GH	GH31	Strep. parasanguinis
contig_4_51	QEW10342.1|GH13_31	8421A4	GH	GH13_31	Strep. parasanguinis
contig_4_66	BBD21966.1|GT2	8421A4	GT	GT2	Strep. parasanguinis
contig_4_67	QEW10325.1|GT2	8421A4	GT	GT2	Strep. parasanguinis
contig_4_80	QEW10309.1|GH32	8421A4	GH	GH32	Strep. parasanguinis
contig_4_134	CBA03971.1|GT30	8421A4	GT	GT30	Strep. parasanguinis
contig_5_26	QAY63367.1|GT2	8421A4	GT	GT2	Strep. parasanguinis
contig_5_52	ADN17640.1|GT2	8421A4	GT	GT2	Strep. parasanguinis
contig_5_74	AJW72812.1|GH23	8421A4	GH	GH23	Strep. parasanguinis
contig_5_75	ANS88621.1|GH23	8421A4	GH	GH23	Strep. parasanguinis
contig_5_85	AEH55758.1|GH13_5	8421A4	GH	GH13_5	Strep. parasanguinis
contig_5_130	AEH55718.1|GH1	8421A4	GH	GH1	Strep. parasanguinis
contig_6_6	WAO96723.1|GH0	8421A4	GH	GH0	Strep. parasanguinis
contig_6_10	AGL64700.2|GH23	8421A4	GH	GH23	Strep. parasanguinis
contig_6_13	AMJ20543.1|GH13_11	8421A4	GH	GH13_11	Strep. parasanguinis
contig_6_15	QWL82947.1|GH23	8421A4	GH	GH23	Strep. parasanguinis
contig_6_45	AFJ26032.1|GT1	8421A4	GT	GT1	Strep. parasanguinis
contig_6_54	AFJ26040.1|CE7	8421A4	CE	CE7	Strep. parasanguinis
contig_6_83	QEW09800.1|GH87	8421A4	GH	GH87	Strep. parasanguinis
contig_6_92	QEW09809.1|GH73	8421A4	GH	GH73	Strep. parasanguinis
contig_6_121	CAE6204650.1|GH28	8421A4	GH	GH28	Strep. parasanguinis
contig_7_15	CCO12102.2|GH13_31	8421A4	GH	GH13_31	Strep. parasanguinis
contig_7_18	QYU66396.1|GH13_23	8421A4	GH	GH13_23	Strep. parasanguinis
contig_7_27	VED66297.1|GH35	8421A4	GH	GH35	Strep. parasanguinis
contig_7_62	QWU85921.1|GH130	8421A4	GH	GH130	Strep. parasanguinis
contig_7_64	QWL81888.1|CBM50	8421A4	CBM	CBM50	Strep. parasanguinis
contig_7_73	AGL63717.2|GT4	8421A4	GT	GT4	Strep. parasanguinis
contig_7_81	WAO96723.1|GH0	8421A4	GH	GH0	Strep. parasanguinis
contig_7_97	AFJ25141.1|GH29	8421A4	GH	GH29	Strep. parasanguinis
contig_8_45	AFJ26415.1|GH25	8421A4	GH	GH25	Strep. parasanguinis
contig_8_55	QBQ55251.1|CBM50	8421A4	CBM	CBM50	Strep. parasanguinis
contig_8_72	CCO12112.2|GH13_31	8421A4	GH	GH13_31	Strep. parasanguinis
contig_8_87	CCO11681.2|GH25	8421A4	GH	GH25	Strep. parasanguinis
contig_9_13	QWL83524.1|GH13_29	8421A4	GH	GH13_29	Strep. parasanguinis
contig_9_16	CCO11054.2|CBM50	8421A4	CBM	CBM50	Strep. parasanguinis
contig_9_28	CCO10293.2|CBM50	8421A4	CBM	CBM50	Strep. parasanguinis
contig_9_47	AGL63871.2|GT2	8421A4	GT	GT2	Strep. parasanguinis
contig_9_87	AFJ26454.1|GT4	8421A4	GT	GT4	Strep. parasanguinis
contig_9_88	QEW10135.1|GT4	8421A4	GT	GT4	Strep. parasanguinis
contig_9_89	CAN65674.1|GH28	8421A4	GH	GH28	Strep. parasanguinis
contig_10_37	AGL64345.2|GT2	8421A4	GT	GT2	Strep. parasanguinis
contig_10_40	QEW09192.1|CE9	8421A4	CE	CE9	Strep. parasanguinis
contig_10_47	AWK41767.1|GH13_3	8421A4	GH	GH13_3	Strep. parasanguinis
contig_10_61	QEW09214.1|GT51	8421A4	GT	GT51	Strep. parasanguinis
contig_11_15	QEW09103.1|GH20	8421A4	GH	GH20	Strep. parasanguinis
contig_12_7	AEH55353.1|CBM41|CBM48|GH13_14	8421A4	CBM	CBM41	Strep. parasanguinis
contig_12_7	AEH55353.1|CBM41|CBM48|GH13_14	8421A4	CBM	CBM48	Strep. parasanguinis
contig_12_7	AEH55353.1|CBM41|CBM48|GH13_14	8421A4	GH	GH13_14	Strep. parasanguinis
contig_12_16	CCO09729.2|GH1	8421A4	GH	GH1	Strep. parasanguinis
contig_12_42	AEH55398.1|CBM34|GH13_20	8421A4	CBM	CBM34	Strep. parasanguinis
contig_12_42	AEH55398.1|CBM34|GH13_20	8421A4	GH	GH13_20	Strep. parasanguinis
contig_13_40	CCO11994.2|GT4	8421A4	GT	GT4	Strep. parasanguinis
contig_13_42	BEI59196.1|GH130_1	8421A4	GH	GH130_1	Strep. parasanguinis
contig_14_21	QEW09554.1|CE4	8421A4	CE	CE4	Strep. parasanguinis
contig_14_25	QWL82731.1|GT2	8421A4	GT	GT2	Strep. parasanguinis
contig_14_27	QGU81022.1|GT2	8421A4	GT	GT2	Strep. parasanguinis
contig_14_30	ALR80397.1|GT2	8421A4	GT	GT2	Strep. parasanguinis
contig_14_32	AEH55326.1|GT4	8421A4	GT	GT4	Strep. parasanguinis
contig_14_33	VEE19589.1|GT2	8421A4	GT	GT2	Strep. parasanguinis
contig_14_36	SQH51749.1|GT4	8421A4	GT	GT4	Strep. parasanguinis
contig_14_37	SQF25488.1|GT0	8421A4	GT	GT0	Strep. parasanguinis
contig_15_2	QBX17745.1|GH25	8421A4	GH	GH25	Strep. parasanguinis
contig_1_25	CCO12102.2|GH13_31	8421OA3	GH	GH13_31	Strep. salivarius
contig_1_28	QYU66396.1|GH13_23	8421OA3	GH	GH13_23	Strep. salivarius
contig_1_47	CUS05224.2|CE14	8421OA3	CE	CE14	Strep. salivarius
contig_1_72	AGL63717.2|GT4	8421OA3	GT	GT4	Strep. salivarius
contig_1_75	CAD7252417.1|GH13	8421OA3	GH	GH13	Strep. salivarius
contig_1_118	AIY20374.1|GH73	8421OA3	GH	GH73	Strep. salivarius
contig_1_135	WJM08831.1|CBM50	8421OA3	CBM	CBM50	Strep. salivarius
contig_1_139	ARC23526.1|GH66	8421OA3	GH	GH66	Strep. salivarius
contig_1_176	AGL64353.2|CBM50|GH25	8421OA3	CBM	CBM50	Strep. salivarius
contig_1_176	AGL64353.2|CBM50|GH25	8421OA3	GH	GH25	Strep. salivarius
contig_1_180	QYO62262.1|GH13	8421OA3	GH	GH13	Strep. salivarius
contig_1_185	CCB94559.1|GT51	8421OA3	GT	GT51	Strep. salivarius
contig_1_192	CUS04921.2|GT4	8421OA3	GT	GT4	Strep. salivarius
contig_1_206	VED87258.1|GT51	8421OA3	GT	GT51	Strep. salivarius
contig_1_296	AGL64345.2|GT2	8421OA3	GT	GT2	Strep. salivarius
contig_1_302	QBQ55251.1|CBM50	8421OA3	CBM	CBM50	Strep. salivarius
contig_1_305	ARC23688.1|GH32	8421OA3	GH	GH32	Strep. salivarius
contig_1_306	CCB94680.1|GH68	8421OA3	GH	GH68	Strep. salivarius
contig_1_312	CCO10293.2|CBM50	8421OA3	CBM	CBM50	Strep. salivarius
contig_1_322	CCO11054.2|CBM50	8421OA3	CBM	CBM50	Strep. salivarius
contig_1_353	QEM33225.1|GT4	8421OA3	GT	GT4	Strep. salivarius
contig_1_354	CCB94729.1|GT8	8421OA3	GT	GT8	Strep. salivarius
contig_1_367	BBF72686.1|GT2	8421OA3	GT	GT2	Strep. salivarius
contig_1_381	ALR79370.1|CBM50	8421OA3	CBM	CBM50	Strep. salivarius
contig_1_386	CCO12633.2|GH84	8421OA3	GH	GH84	Strep. salivarius
contig_1_392	QUI22575.1|CBM50	8421OA3	CBM	CBM50	Strep. salivarius
contig_1_417	CAG7911095.1|GH5_11	8421OA3	GH	GH5_11	Strep. salivarius
contig_1_426	CAD7245033.1|GT58	8421OA3	GT	GT58	Strep. salivarius
contig_1_439	CCB94814.1|GH73	8421OA3	GH	GH73	Strep. salivarius
contig_1_444	CCB94819.1|CE9	8421OA3	CE	CE9	Strep. salivarius
contig_1_449	QXF33454.1|GH13_3	8421OA3	GH	GH13_3	Strep. salivarius
contig_1_536	ARI57676.1|GT4	8421OA3	GT	GT4	Strep. salivarius
contig_1_537	CCB94909.1|GT4	8421OA3	GT	GT4	Strep. salivarius
contig_1_539	CAN65674.1|GH28	8421OA3	GH	GH28	Strep. salivarius
contig_1_570	AGL63717.2|GT4	8421OA3	GT	GT4	Strep. salivarius
contig_1_600	CCO12112.2|GH13_31	8421OA3	GH	GH13_31	Strep. salivarius
contig_1_645	CCB95265.1|GH23	8421OA3	GH	GH23	Strep. salivarius
contig_1_647	AZF90413.1|GH73	8421OA3	GH	GH73	Strep. salivarius
contig_1_655	ARU14305.1|GH25	8421OA3	GH	GH25	Strep. salivarius
contig_1_667	CCO09729.2|GH1	8421OA3	GH	GH1	Strep. salivarius
contig_1_738	VED88239.1|CBM50	8421OA3	CBM	CBM50	Strep. salivarius
contig_1_743	ARC22197.1|GH25	8421OA3	GH	GH25	Strep. salivarius
contig_1_757	CCB95088.1|GH87	8421OA3	GH	GH87	Strep. salivarius
contig_1_779	CCB95110.1|GT28	8421OA3	GT	GT28	Strep. salivarius
contig_1_818	QAY63367.1|GT2	8421OA3	GT	GT2	Strep. salivarius
contig_1_828	BBD21966.1|GT2	8421OA3	GT	GT2	Strep. salivarius
contig_1_844	QGU82775.1|GT2	8421OA3	GT	GT2	Strep. salivarius
contig_1_845	CCB95176.1|GH70	8421OA3	GH	GH70	Strep. salivarius
contig_1_846	ARC22290.1|GH70	8421OA3	GH	GH70	Strep. salivarius
contig_1_850	QGU80438.1|GH70	8421OA3	GH	GH70	Strep. salivarius
contig_1_864	CCO11632.2|GH3	8421OA3	GH	GH3	Strep. salivarius
contig_1_881	AWZ17133.1|GH13_30	8421OA3	GH	GH13_30	Strep. salivarius
contig_1_908	ARC22350.1|GT4	8421OA3	GT	GT4	Strep. salivarius
contig_1_935	QBQ55251.1|CBM50	8421OA3	CBM	CBM50	Strep. salivarius
contig_1_946	QMI50933.1|GH73	8421OA3	GH	GH73	Strep. salivarius
contig_1_973	ARI57307.1|GT4	8421OA3	GT	GT4	Strep. salivarius
contig_1_974	ARC34312.1|GT4	8421OA3	GT	GT4	Strep. salivarius
contig_1_976	CCB95356.1|GT2	8421OA3	GT	GT2	Strep. salivarius
contig_1_978	ARC22418.1|GT4	8421OA3	GT	GT4	Strep. salivarius
contig_1_979	ARC22419.1|GT2	8421OA3	GT	GT2	Strep. salivarius
contig_1_982	ARC22422.1|GT4	8421OA3	GT	GT4	Strep. salivarius
contig_1_988	QGU78626.1|GH1	8421OA3	GH	GH1	Strep. salivarius
contig_1_1005	ARC22445.1|GH25	8421OA3	GH	GH25	Strep. salivarius
contig_1_1006	QGU80591.1|GH25	8421OA3	GH	GH25	Strep. salivarius
contig_1_1007	CCB93349.1|GH25	8421OA3	GH	GH25	Strep. salivarius
contig_1_1008	AEJ53430.1|CBM41|CBM48|GH13_12	8421OA3	CBM	CBM41	Strep. salivarius
contig_1_1008	AEJ53430.1|CBM41|CBM48|GH13_12	8421OA3	CBM	CBM48	Strep. salivarius
contig_1_1008	AEJ53430.1|CBM41|CBM48|GH13_12	8421OA3	GH	GH13_12	Strep. salivarius
contig_1_1019	ALR79940.1|GH77	8421OA3	GH	GH77	Strep. salivarius
contig_1_1020	QKH69755.1|GT35	8421OA3	GT	GT35	Strep. salivarius
contig_1_1095	AGL64020.2|AA10	8421OA3	AA	AA10	Strep. salivarius
contig_1_1126	CAE6204650.1|GH28	8421OA3	GH	GH28	Strep. salivarius
contig_1_1159	QGU80711.1|GH73	8421OA3	GH	GH73	Strep. salivarius
contig_1_1199	BEI59196.1|GH130_1	8421OA3	GH	GH130_1	Strep. salivarius
contig_1_1211	CCB95570.1|GH23	8421OA3	GH	GH23	Strep. salivarius
contig_1_1213	AMJ20543.1|GH13_11	8421OA3	GH	GH13_11	Strep. salivarius
contig_1_1216	AGL64700.2|GH23	8421OA3	GH	GH23	Strep. salivarius
contig_1_1260	QKH69958.1|CBM66|GH32	8421OA3	CBM	CBM66	Strep. salivarius
contig_1_1260	QKH69958.1|CBM66|GH32	8421OA3	GH	GH32	Strep. salivarius
contig_1_1284	ARC22690.1|GT1	8421OA3	GT	GT1	Strep. salivarius
contig_1_1286	ARC22692.1|GT2	8421OA3	GT	GT2	Strep. salivarius
contig_1_1288	ARC22694.1|GT1	8421OA3	GT	GT1	Strep. salivarius
contig_1_1348	CCB95710.1|GH2	8421OA3	GH	GH2	Strep. salivarius
contig_1_1349	AUH38424.1|GH42	8421OA3	GH	GH42	Strep. salivarius
contig_1_1351	ADN17640.1|GT2	8421OA3	GT	GT2	Strep. salivarius
contig_1_1355	ALR80256.1|GH13_31	8421OA3	GH	GH13_31	Strep. salivarius
contig_1_1379	CCB95739.1|GH70	8421OA3	GH	GH70	Strep. salivarius
contig_1_1381	AAE35922.1|GH70|2.4.1.5	8421OA3	GH	GH70	Strep. salivarius
contig_1_1382	CCB95742.1|GH70	8421OA3	GH	GH70	Strep. salivarius
contig_1_1405	AAC41412.1|GH70|2.4.1.5	8421OA3	GH	GH70	Strep. salivarius
contig_1_1416	AIY21503.1|GT113	8421OA3	GT	GT113	Strep. salivarius
contig_1_1419	VED88731.1|GT8	8421OA3	GT	GT8	Strep. salivarius
contig_1_1420	QGU80948.1|GT4	8421OA3	GT	GT4	Strep. salivarius
contig_1_1426	ARI56918.1|GT2|GT8	8421OA3	GT	GT2	Strep. salivarius
contig_1_1426	ARI56918.1|GT2|GT8	8421OA3	GT	GT8	Strep. salivarius
contig_1_1443	CCB95794.1|GT35	8421OA3	GT	GT35	Strep. salivarius
contig_1_1444	ARC49350.1|GT5	8421OA3	GT	GT5	Strep. salivarius
contig_1_1446	BBM21727.1|GH13_9	8421OA3	GH	GH13_9	Strep. salivarius
contig_1_1447	QGU78229.1|CBM48|GH13_9	8421OA3	CBM	CBM48	Strep. salivarius
contig_1_1447	QGU78229.1|CBM48|GH13_9	8421OA3	GH	GH13_9	Strep. salivarius
contig_1_1448	QGU80974.1|CBM41|CBM48|GH13_14	8421OA3	CBM	CBM41	Strep. salivarius
contig_1_1448	QGU80974.1|CBM41|CBM48|GH13_14	8421OA3	CBM	CBM48	Strep. salivarius
contig_1_1448	QGU80974.1|CBM41|CBM48|GH13_14	8421OA3	GH	GH13_14	Strep. salivarius
contig_1_1449	AGL63871.2|GT2	8421OA3	GT	GT2	Strep. salivarius
contig_1_1461	ALR09732.2|GH92	8421OA3	GH	GH92	Strep. salivarius
contig_1_1487	VEE19593.1|GT0	8421OA3	GT	GT0	Strep. salivarius
contig_1_1490	ARI58625.1|GT2	8421OA3	GT	GT2	Strep. salivarius
contig_1_1491	ARC22883.1|GT4	8421OA3	GT	GT4	Strep. salivarius
contig_1_1492	ARC22884.1|GT4	8421OA3	GT	GT4	Strep. salivarius
contig_1_1494	ARC22886.2|GT2|GT4	8421OA3	GT	GT2	Strep. salivarius
contig_1_1494	ARC22886.2|GT2|GT4	8421OA3	GT	GT4	Strep. salivarius
contig_1_1496	ARC22887.1|GT2	8421OA3	GT	GT2	Strep. salivarius
contig_1_1498	ARC22889.2|GT2	8421OA3	GT	GT2	Strep. salivarius
contig_1_1499	ARC22890.1|GT2	8421OA3	GT	GT2	Strep. salivarius
contig_1_1500	ARC22891.1|GT2	8421OA3	GT	GT2	Strep. salivarius
contig_1_1504	ARI58611.1|GT2	8421OA3	GT	GT2	Strep. salivarius
contig_1_1551	CCB95895.1|GH13_5	8421OA3	GH	GH13_5	Strep. salivarius
contig_1_1582	ALR80481.1|CE4	8421OA3	CE	CE4	Strep. salivarius
contig_1_1594	AGL63702.2|GT4	8421OA3	GT	GT4	Strep. salivarius
contig_1_1631	WAO96723.1|GH0	8421OA3	GH	GH0	Strep. salivarius
contig_1_1642	AGL63717.2|GT4	8421OA3	GT	GT4	Strep. salivarius
contig_1_1663	AMB83364.1|GH1	8421OA3	GH	GH1	Strep. salivarius
contig_1_1668	AIY21726.1|GT4	8421OA3	GT	GT4	Strep. salivarius
contig_1_1669	VED89908.1|GT8	8421OA3	GT	GT8	Strep. salivarius
contig_1_1670	ALR80556.1|GT2	8421OA3	GT	GT2	Strep. salivarius
contig_1_1671	AIY21729.1|GT8	8421OA3	GT	GT8	Strep. salivarius
contig_1_1672	AIY21730.1|GH1	8421OA3	GH	GH1	Strep. salivarius
contig_1_1767	AOG60880.1|GH32	8421OA3	GH	GH32	Strep. salivarius
contig_1_1768	CCB96107.1|GH32	8421OA3	GH	GH32	Strep. salivarius
contig_1_1787	CCO11994.2|GT4	8421OA3	GT	GT4	Strep. salivarius
contig_1_1806	CCB96145.1|CBM50	8421OA3	CBM	CBM50	Strep. salivarius
contig_1_1812	CAD7226128.1|GH38	8421OA3	GH	GH38	Strep. salivarius
contig_1_1858	CAI32748.2|GT4	8421OA3	GT	GT4	Strep. salivarius
contig_1_1892	CCO12868.2|GH1	8421OA3	GH	GH1	Strep. salivarius
contig_1_1894	ARC23275.1|GT51	8421OA3	GT	GT51	Strep. salivarius
contig_1_1899	WAO96723.1|GH0	8421OA3	GH	GH0	Strep. salivarius
contig_1_1908	CCB94270.1|GH13_29	8421OA3	GH	GH13_29	Strep. salivarius
contig_1_1909	QCH95999.1|GH13_29	8421OA3	GH	GH13_29	Strep. salivarius
contig_1_1938	QMI51832.1|GH73	8421OA3	GH	GH73	Strep. salivarius
contig_1_1976	CAN80640.1|GT47	8421OA3	GT	GT47	Strep. salivarius
contig_1_1996	ALR08738.2|GT83	8421OA3	GT	GT83	Strep. salivarius
contig_1_2022	CCB96333.1|GT2	8421OA3	GT	GT2	Strep. salivarius
contig_1_2023	ARC23371.1|GT2	8421OA3	GT	GT2	Strep. salivarius
contig_1_2046	CCB96357.1|GH23	8421OA3	GH	GH23	Strep. salivarius
contig_1_2047	CCB96358.1|CBM50	8421OA3	CBM	CBM50	Strep. salivarius
contig_1_54	QBZ13217.1|GH13_5	8431AN1	GH	GH13_5	Strep. mitis
contig_1_65	CCO09729.2|GH1	8431AN1	GH	GH1	Strep. mitis
contig_1_70	QBF69139.1|GT4	8431AN1	GT	GT4	Strep. mitis
contig_1_71	QGS42029.1|GT2	8431AN1	GT	GT2	Strep. mitis
contig_1_85	BBF72686.1|GT2	8431AN1	GT	GT2	Strep. mitis
contig_1_110	CCO12633.2|GH84	8431AN1	GH	GH84	Strep. mitis
contig_1_131	AGL63717.2|GT4	8431AN1	GT	GT4	Strep. mitis
contig_1_217	CBJ22213.1|GH73	8431AN1	GH	GH73	Strep. mitis
contig_1_230	QUI22575.1|CBM50	8431AN1	CBM	CBM50	Strep. mitis
contig_1_241	ABJ55061.1|GT4	8431AN1	GT	GT4	Strep. mitis
contig_1_242	AYF95594.1|GT4	8431AN1	GT	GT4	Strep. mitis
contig_1_261	CCO11632.2|GH3	8431AN1	GH	GH3	Strep. mitis
contig_1_268	CAE6204650.1|GH28	8431AN1	GH	GH28	Strep. mitis
contig_1_280	BDB09134.1|GH1	8431AN1	GH	GH1	Strep. mitis
contig_1_320	AXG41638.1|GH23	8431AN1	GH	GH23	Strep. mitis
contig_1_355	QIW86704.1|GH23	8431AN1	GH	GH23	Strep. mitis
contig_1_412	QBZ13518.1|CBM34|GH13_20	8431AN1	CBM	CBM34	Strep. mitis
contig_1_412	QBZ13518.1|CBM34|GH13_20	8431AN1	GH	GH13_20	Strep. mitis
contig_1_454	QIW86704.1|GH23	8431AN1	GH	GH23	Strep. mitis
contig_1_468	QWU85921.1|GH130	8431AN1	GH	GH130	Strep. mitis
contig_1_478	VFH50122.1|CBM40|GH33	8431AN1	CBM	CBM40	Strep. mitis
contig_1_478	VFH50122.1|CBM40|GH33	8431AN1	GH	GH33	Strep. mitis
contig_1_493	QBZ11785.1|GH23	8431AN1	GH	GH23	Strep. mitis
contig_1_495	AMJ20543.1|GH13_11	8431AN1	GH	GH13_11	Strep. mitis
contig_1_499	AGL64700.2|GH23	8431AN1	GH	GH23	Strep. mitis
contig_2_5	QBZ14303.1|GT2	8431AN1	GT	GT2	Strep. mitis
contig_2_10	BDB10062.1|CBM50	8431AN1	CBM	CBM50	Strep. mitis
contig_2_125	CCO09992.2|GH32	8431AN1	GH	GH32	Strep. mitis
contig_2_126	CUS04921.2|GT4	8431AN1	GT	GT4	Strep. mitis
contig_2_195	AGL64353.2|CBM50|GH25	8431AN1	CBM	CBM50	Strep. mitis
contig_2_195	AGL64353.2|CBM50|GH25	8431AN1	GH	GH25	Strep. mitis
contig_2_196	ALD67473.1|GH1	8431AN1	GH	GH1	Strep. mitis
contig_2_199	QGS42909.1|CBM41|CBM48|GH13_12	8431AN1	CBM	CBM41	Strep. mitis
contig_2_199	QGS42909.1|CBM41|CBM48|GH13_12	8431AN1	CBM	CBM48	Strep. mitis
contig_2_199	QGS42909.1|CBM41|CBM48|GH13_12	8431AN1	GH	GH13_12	Strep. mitis
contig_2_201	CCO12868.2|GH1	8431AN1	GH	GH1	Strep. mitis
contig_2_245	CCO11681.2|GH25	8431AN1	GH	GH25	Strep. mitis
contig_2_269	QGS42837.1|GH31	8431AN1	GH	GH31	Strep. mitis
contig_2_285	AGL63717.2|GT4	8431AN1	GT	GT4	Strep. mitis
contig_2_288	AZT86650.1|GH13_31	8431AN1	GH	GH13_31	Strep. mitis
contig_2_296	QKL34069.1|GT26	8431AN1	GT	GT26	Strep. mitis
contig_2_297	QKL33730.1|GT4	8431AN1	GT	GT4	Strep. mitis
contig_2_298	QTF54836.1|GT0	8431AN1	GT	GT0	Strep. mitis
contig_2_299	QKL33728.1|GT2	8431AN1	GT	GT2	Strep. mitis
contig_2_303	QKL33724.1|GT113	8431AN1	GT	GT113	Strep. mitis
contig_2_305	QBZ14099.1|GT51	8431AN1	GT	GT51	Strep. mitis
contig_2_311	CBA03971.1|GT30	8431AN1	GT	GT30	Strep. mitis
contig_2_356	AGL63702.2|GT4	8431AN1	GT	GT4	Strep. mitis
contig_2_383	QKL33630.1|GH32	8431AN1	GH	GH32	Strep. mitis
contig_2_397	CAD7252417.1|GH13	8431AN1	GH	GH13	Strep. mitis
contig_2_400	CAE6076421.1|GH27	8431AN1	GH	GH27	Strep. mitis
contig_2_434	QGS42675.1|GH25	8431AN1	GH	GH25	Strep. mitis
contig_2_454	QBQ55251.1|CBM50	8431AN1	CBM	CBM50	Strep. mitis
contig_3_5	CCO12112.2|GH13_31	8431AN1	GH	GH13_31	Strep. mitis
contig_3_9	QBZ11820.1|GT5	8431AN1	GT	GT5	Strep. mitis
contig_3_11	BBM21727.1|GH13_9	8431AN1	GH	GH13_9	Strep. mitis
contig_3_12	QGS42351.1|CBM48|GH13_9	8431AN1	CBM	CBM48	Strep. mitis
contig_3_12	QGS42351.1|CBM48|GH13_9	8431AN1	GH	GH13_9	Strep. mitis
contig_3_14	BDB09342.1|CBM41|CBM48|GH13_14	8431AN1	CBM	CBM41	Strep. mitis
contig_3_14	BDB09342.1|CBM41|CBM48|GH13_14	8431AN1	CBM	CBM48	Strep. mitis
contig_3_14	BDB09342.1|CBM41|CBM48|GH13_14	8431AN1	GH	GH13_14	Strep. mitis
contig_3_17	BEI59196.1|GH130_1	8431AN1	GH	GH130_1	Strep. mitis
contig_3_25	CCO11994.2|GT4	8431AN1	GT	GT4	Strep. mitis
contig_3_185	QGS42460.1|GH25	8431AN1	GH	GH25	Strep. mitis
contig_3_199	CAD7245033.1|GT58	8431AN1	GT	GT58	Strep. mitis
contig_4_27	ALD68492.1|GH95	8431AN1	GH	GH95	Strep. mitis
contig_4_56	ANR74558.1|CE7	8431AN1	CE	CE7	Strep. mitis
contig_4_130	AGL64020.2|AA10	8431AN1	AA	AA10	Strep. mitis
contig_4_138	BBA59836.1|GH13_18	8431AN1	GH	GH13_18	Strep. mitis
contig_4_142	QBZ11238.1|GH36	8431AN1	GH	GH36	Strep. mitis
contig_5_9	CAD7226128.1|GH38	8431AN1	GH	GH38	Strep. mitis
contig_5_93	QBZ12913.1|CBM32|GH85	8431AN1	CBM	CBM32	Strep. mitis
contig_5_93	QBZ12913.1|CBM32|GH85	8431AN1	GH	GH85	Strep. mitis
contig_5_126	AGL64345.2|GT2	8431AN1	GT	GT2	Strep. mitis
contig_5_137	CAG7911095.1|GH5_11	8431AN1	GH	GH5_11	Strep. mitis
contig_5_148	QYO62262.1|GH13	8431AN1	GH	GH13	Strep. mitis
contig_6_57	AGL63717.2|GT4	8431AN1	GT	GT4	Strep. mitis
contig_6_76	VEI38019.1|GT11	8431AN1	GT	GT11	Strep. mitis
contig_6_78	QBZ12541.1|GT2|GT52	8431AN1	GT	GT2	Strep. mitis
contig_6_78	QBZ12541.1|GT2|GT52	8431AN1	GT	GT52	Strep. mitis
contig_6_79	VEI37835.1|GT0	8431AN1	GT	GT0	Strep. mitis
contig_6_86	BCJ11502.1|CBM71|GH2	8431AN1	CBM	CBM71	Strep. mitis
contig_6_86	BCJ11502.1|CBM71|GH2	8431AN1	GH	GH2	Strep. mitis
contig_6_87	QBZ12532.1|GH29	8431AN1	GH	GH29	Strep. mitis
contig_6_88	BDB10085.1|GH92	8431AN1	GH	GH92	Strep. mitis
contig_6_89	VFI07859.1|GH125	8431AN1	GH	GH125	Strep. mitis
contig_6_90	BDB10083.1|GH38	8431AN1	GH	GH38	Strep. mitis
contig_6_92	ALD67341.1|GH20	8431AN1	GH	GH20	Strep. mitis
contig_7_33	ALD67804.1|GT28	8431AN1	GT	GT28	Strep. mitis
contig_7_56	QBQ55156.1|CBM50	8431AN1	CBM	CBM50	Strep. mitis
contig_7_60	ALD67832.1|GH1	8431AN1	GH	GH1	Strep. mitis
contig_7_73	CCO10293.2|CBM50	8431AN1	CBM	CBM50	Strep. mitis
contig_8_2	QBZ10969.1|GT52	8431AN1	GT	GT52	Strep. mitis
contig_8_5	QQQ35412.1|GT0	8431AN1	GT	GT0	Strep. mitis
contig_8_14	ALD67202.1|GH35	8431AN1	GH	GH35	Strep. mitis
contig_8_21	QYU66396.1|GH13_23	8431AN1	GH	GH13_23	Strep. mitis
contig_8_24	CCO12102.2|GH13_31	8431AN1	GH	GH13_31	Strep. mitis
contig_8_63	CAN80640.1|GT47	8431AN1	GT	GT47	Strep. mitis
contig_9_14	QXF33454.1|GH13_3	8431AN1	GH	GH13_3	Strep. mitis
contig_9_31	CCO11054.2|CBM50	8431AN1	CBM	CBM50	Strep. mitis
contig_10_4	ALD67096.1|GT51	8431AN1	GT	GT51	Strep. mitis
contig_10_43	ALD67121.1|CE9	8431AN1	CE	CE9	Strep. mitis
contig_10_49	QGS41596.1|CBM50	8431AN1	CBM	CBM50	Strep. mitis
contig_11_14	AGL63871.2|GT2	8431AN1	GT	GT2	Strep. mitis
contig_11_44	QGS42520.1|CE4	8431AN1	CE	CE4	Strep. mitis
contig_12_9	QBZ10976.1|GT2	8431AN1	GT	GT2	Strep. mitis
contig_12_33	WAO96723.1|GH0	8431AN1	GH	GH0	Strep. mitis
contig_12_46	ALR08738.2|GT83	8431AN1	GT	GT83	Strep. mitis
contig_13_12	CAI32748.2|GT4	8431AN1	GT	GT4	Strep. mitis
contig_13_18	QBZ11016.1|GT51	8431AN1	GT	GT51	Strep. mitis
contig_13_24	QGS41569.1|GT35	8431AN1	GT	GT35	Strep. mitis
contig_13_25	CBJ21436.1|GH77	8431AN1	GH	GH77	Strep. mitis
contig_13_26	CCO11983.2|CBM50|CE4	8431AN1	CBM	CBM50	Strep. mitis
[truncated: 10,285 more rows]

## Sheet: cazy_class_composition_cancer
Supplementary Table 4: CAZyme class distribution across species
Species	CAZy_Class	Total_Class_Count	Total	Proportion	Source
Strep. anginosus	AA	1	342	0.00292398	Cancer
Strep. vestibularis	CBM	9	138	0.0652174	Cancer
Strep. anginosus	CE	14	342	0.0409357	Cancer
Strep. sp901875575	GH	24	46	0.521739	Cancer
Strep. anginosus	GT	97	342	0.283626	Cancer
Strep. anginosus	PL	2	342	0.00584795	Cancer
Strep. caecimuris	AA	1	62	0.016129	Cancer
Strep. massiliensis	CBM	3	45	0.0666667	Cancer
Strep. caecimuris	CE	3	62	0.0483871	Cancer
Strep. constellatus	GH	110	206	0.533981	Cancer
Strep. caecimuris	GT	15	62	0.241935	Cancer
Strep. constellatus	AA	2	206	0.00970874	Cancer
Strep. sp001556435	CBM	4	54	0.0740741	Cancer
Strep. constellatus	CE	8	206	0.038835	Cancer
Strep. cristatus	GH	29	54	0.537037	Cancer
Strep. constellatus	GT	53	206	0.257282	Cancer
Strep. constellatus	PL	8	206	0.038835	Cancer
Strep. cristatus	AA	1	54	0.0185185	Cancer
Strep. salivarius	CBM	24	322	0.0745342	Cancer
Strep. cristatus	CE	3	54	0.0555556	Cancer
Strep.BHI_7	GH	33	61	0.540984	Cancer
Strep. cristatus	GT	14	54	0.259259	Cancer
Strep. gordonii	AA	6	354	0.0169492	Cancer
Strep. mutans	CBM	4	49	0.0816327	Cancer
Strep. gordonii	CE	12	354	0.0338983	Cancer
Strep. sanguinis	GH	59	108	0.546296	Cancer
Strep. gordonii	GT	90	354	0.254237	Cancer
Strep. hominis	AA	1	291	0.00343643	Cancer
Strep. sp001813105	CBM	6	61	0.0983607	Cancer
Strep. hominis	CE	15	291	0.0515464	Cancer
Strep. sinensis	GH	29	53	0.54717	Cancer
Strep. hominis	GT	82	291	0.281787	Cancer
Strep. infantis	AA	8	456	0.0175439	Cancer
Strep. anginosus	CBM	36	342	0.105263	Cancer
Strep. infantis	CE	24	456	0.0526316	Cancer
Strep. pseudopneumoniae	GH	32	58	0.551724	Cancer
Strep. infantis	GT	107	456	0.234649	Cancer
Strep. massiliensis	AA	1	45	0.0222222	Cancer
Strep. hominis	CBM	31	291	0.106529	Cancer
Strep. massiliensis	CE	2	45	0.0444444	Cancer
Strep. hominis	GH	162	291	0.556701	Cancer
Strep. massiliensis	GT	13	45	0.288889	Cancer
Strep. mitis	AA	11	903	0.0121816	Cancer
Strep. sp901875575	CBM	5	46	0.108696	Cancer
Strep. mitis	CE	43	903	0.047619	Cancer
Strep. gordonii	GH	198	354	0.559322	Cancer
Strep. mitis	GT	232	903	0.256921	Cancer
Strep. mutans	AA	1	49	0.0204082	Cancer
Strep. mitis	CBM	99	903	0.109635	Cancer
Strep. mutans	CE	3	49	0.0612245	Cancer
Strep.BHI_3	GH	33	59	0.559322	Cancer
Strep. mutans	GT	12	49	0.244898	Cancer
Strep. oralis	AA	4	494	0.00809717	Cancer
Strep. parasanguinis	CBM	58	522	0.111111	Cancer
Strep. oralis	CE	25	494	0.0506073	Cancer
Strep.BHI_5	GH	33	59	0.559322	Cancer
Strep. oralis	GT	103	494	0.208502	Cancer
Strep. oralis	PL	4	494	0.00809717	Cancer
Strep. parasanguinis	AA	9	522	0.0172414	Cancer
Strep. sanguinis	CBM	12	108	0.111111	Cancer
Strep. parasanguinis	CE	27	522	0.0517241	Cancer
Strep. anginosus	GH	192	342	0.561404	Cancer
Strep. parasanguinis	GT	124	522	0.237548	Cancer
Strep. pseudopneumoniae	AA	1	58	0.0172414	Cancer
Strep. sp029691405	CBM	7	63	0.111111	Cancer
Strep. pseudopneumoniae	CE	3	58	0.0517241	Cancer
Strep. vestibularis	GH	78	138	0.565217	Cancer
Strep. pseudopneumoniae	GT	14	58	0.241379	Cancer
Strep. rubneri	AA	1	62	0.016129	Cancer
Strep.BHI_4	CBM	7	63	0.111111	Cancer
Strep. rubneri	CE	3	62	0.0483871	Cancer
Strep. xiaochunlingii	GH	59	103	0.572816	Cancer
Strep. rubneri	GT	14	62	0.225806	Cancer
Strep. salivarius	AA	6	322	0.0186335	Cancer
Strep. caecimuris	CBM	7	62	0.112903	Cancer
Strep. salivarius	CE	18	322	0.0559006	Cancer
Strep. mitis	GH	518	903	0.573643	Cancer
Strep. salivarius	GT	81	322	0.251553	Cancer
Strep. sanguinis	AA	2	108	0.0185185	Cancer
Strep. sp002238115	CBM	7	61	0.114754	Cancer
Strep. sanguinis	CE	5	108	0.0462963	Cancer
Strep. sp002238115	GH	35	61	0.57377	Cancer
Strep. sanguinis	GT	30	108	0.277778	Cancer
Strep. sinensis	AA	1	53	0.0188679	Cancer
Strep.BHI_10	CBM	7	61	0.114754	Cancer
Strep. sinensis	CE	3	53	0.0566038	Cancer
Strep.BHI_9	GH	35	61	0.57377	Cancer
Strep. sinensis	GT	13	53	0.245283	Cancer
Strep. sp001556435	AA	1	54	0.0185185	Cancer
Strep.BHI_9	CBM	7	61	0.114754	Cancer
Strep. sp001556435	CE	3	54	0.0555556	Cancer
Strep. infantis	GH	262	456	0.574561	Cancer
Strep. sp001556435	GT	13	54	0.240741	Cancer
Strep. sp001813105	AA	1	61	0.0163934	Cancer
Strep. oralis	CBM	57	494	0.115385	Cancer
Strep. sp001813105	CE	3	61	0.0491803	Cancer
Strep.BHI_11	GH	30	52	0.576923	Cancer
Strep. sp001813105	GT	15	61	0.245902	Cancer
Strep.BHI_11	CBM	6	52	0.115385	Cancer
Strep. sp002238115	CE	3	61	0.0491803	Cancer
Strep. massiliensis	GH	26	45	0.577778	Cancer
Strep. sp002238115	GT	16	61	0.262295	Cancer
Strep. sp013394695	AA	1	57	0.0175439	Cancer
Strep. xiaochunlingii	CBM	12	103	0.116505	Cancer
Strep. sp013394695	CE	3	57	0.0526316	Cancer
Strep. caecimuris	GH	36	62	0.580645	Cancer
Strep. sp013394695	GT	12	57	0.210526	Cancer
Strep.BHI_5	CBM	7	59	0.118644	Cancer
Strep. sp029691405	CE	3	63	0.047619	Cancer
Strep. rubneri	GH	36	62	0.580645	Cancer
Strep. sp029691405	GT	13	63	0.206349	Cancer
Strep. sp029691405	PL	2	63	0.031746	Cancer
Strep. infantis	CBM	55	456	0.120614	Cancer
Strep. sp901875575	CE	3	46	0.0652174	Cancer
Strep. parasanguinis	GH	304	522	0.582375	Cancer
Strep. sp901875575	GT	14	46	0.304348	Cancer
Strep. vestibularis	AA	3	138	0.0217391	Cancer
Strep.BHI_1	CBM	7	58	0.12069	Cancer
Strep. vestibularis	CE	6	138	0.0434783	Cancer
Strep.BHI_1	GH	34	58	0.586207	Cancer
Strep. vestibularis	GT	42	138	0.304348	Cancer
Strep. xiaochunlingii	AA	2	103	0.0194175	Cancer
Strep.BHI_6	CBM	7	58	0.12069	Cancer
Strep. xiaochunlingii	CE	6	103	0.0582524	Cancer
Strep.BHI_6	GH	34	58	0.586207	Cancer
Strep. xiaochunlingii	GT	24	103	0.23301	Cancer
Strep. constellatus	CBM	25	206	0.121359	Cancer
Strep.BHI_1	CE	3	58	0.0517241	Cancer
Strep.BHI_2	GH	33	56	0.589286	Cancer
Strep.BHI_1	GT	14	58	0.241379	Cancer
Strep.BHI_10	AA	1	61	0.0163934	Cancer
Strep. sp013394695	CBM	7	57	0.122807	Cancer
Strep.BHI_10	CE	3	61	0.0491803	Cancer
Strep. sp001813105	GH	36	61	0.590164	Cancer
Strep.BHI_10	GT	12	61	0.196721	Cancer
Strep.BHI_11	AA	1	52	0.0192308	Cancer
Strep.BHI_8	CBM	14	114	0.122807	Cancer
Strep.BHI_11	CE	3	52	0.0576923	Cancer
Strep. mutans	GH	29	49	0.591837	Cancer
Strep.BHI_11	GT	11	52	0.211538	Cancer
Strep.BHI_11	PL	1	52	0.0192308	Cancer
Strep.BHI_2	CBM	7	56	0.125	Cancer
Strep.BHI_2	CE	3	56	0.0535714	Cancer
Strep. sp013394695	GH	34	57	0.596491	Cancer
Strep.BHI_2	GT	13	56	0.232143	Cancer
Strep.BHI_3	AA	1	59	0.0169492	Cancer
Strep. rubneri	CBM	8	62	0.129032	Cancer
Strep.BHI_3	CE	3	59	0.0508475	Cancer
Strep. salivarius	GH	193	322	0.599379	Cancer
Strep.BHI_3	GT	14	59	0.237288	Cancer
Strep.BHI_4	AA	1	63	0.015873	Cancer
Strep. cristatus	CBM	7	54	0.12963	Cancer
Strep.BHI_4	CE	3	63	0.047619	Cancer
Strep. sp029691405	GH	38	63	0.603175	Cancer
Strep.BHI_4	GT	14	63	0.222222	Cancer
Strep.BHI_5	AA	1	59	0.0169492	Cancer
Strep.BHI_7	CBM	8	61	0.131148	Cancer
Strep.BHI_5	CE	3	59	0.0508475	Cancer
Strep.BHI_4	GH	38	63	0.603175	Cancer
Strep.BHI_5	GT	15	59	0.254237	Cancer
Strep.BHI_6	AA	1	58	0.0172414	Cancer
Strep. sinensis	CBM	7	53	0.132075	Cancer
Strep.BHI_6	CE	3	58	0.0517241	Cancer
Strep. oralis	GH	301	494	0.609312	Cancer
Strep.BHI_6	GT	13	58	0.224138	Cancer
Strep.BHI_7	AA	1	61	0.0163934	Cancer
Strep. gordonii	CBM	48	354	0.135593	Cancer
Strep.BHI_7	CE	3	61	0.0491803	Cancer
Strep. sp001556435	GH	33	54	0.611111	Cancer
Strep.BHI_7	GT	16	61	0.262295	Cancer
Strep.BHI_8	AA	2	114	0.0175439	Cancer
Strep.BHI_3	CBM	8	59	0.135593	Cancer
Strep.BHI_8	CE	6	114	0.0526316	Cancer
Strep.BHI_10	GH	38	61	0.622951	Cancer
Strep.BHI_8	GT	20	114	0.175439	Cancer
Strep. pseudopneumoniae	CBM	8	58	0.137931	Cancer
Strep.BHI_9	CE	3	61	0.0491803	Cancer
Strep.BHI_8	GH	72	114	0.631579	Cancer
Strep.BHI_9	GT	16	61	0.262295	Cancer

## Sheet: CAZy_diversity_indices_cancer
Supplementary Table 5: CAZyme functional diversity indices
isolate_id	Species	Richness	Shannon	InverseSimpson
8305AN4	Strep.BHI_1	58	4.06044	58
8305OA4	Strep.BHI_2	56	4.02535	56
8324OA8	Strep.BHI_3	59	4.07754	59
8324OAN8	Strep. parasanguinis	61	4.11087	61
8355A1	Strep. salivarius	55	4.00733	55
8355AN1	Strep. infantis	60	4.09434	60
8355AN2	Strep. salivarius	55	4.00733	55
8389O4	Strep. sp013394695	57	4.04305	57
8389S2	Strep. oralis	58	4.06044	58
8389SA4	Strep. sp001556435	54	3.98898	54
8408OA3	Strep. parasanguinis	53	3.97029	53
8420OA2	Strep. oralis	63	4.14313	63
8420OA3	Strep. hominis	49	3.89182	49
8421A4	Strep. parasanguinis	56	4.02535	56
8421OA3	Strep. salivarius	52	3.95124	52
8431AN1	Strep. mitis	63	4.14313	63
8431AN6	Strep.BHI_4	63	4.14313	63
8451AG2	Strep. infantis	53	3.97029	53
8451ANG2	Strep. gordonii	60	4.09434	60
8451ANT1	Strep.BHI_5	59	4.07754	59
8451ANT4	Strep. infantis	59	4.07754	59
8451AT5	Strep. infantis	53	3.97029	53
8451AT6	Strep. infantis	58	4.06044	58
8451AT7	Strep. sanguinis	54	3.98898	54
8451AT8	Strep.BHI_6	58	4.06044	58
8451DM12	Strep. gordonii	60	4.09434	60
8451DM4	Strep. oralis	61	4.11087	61
8451DM8	Strep. hominis	49	3.89182	49
8451DM9	Strep. mitis	61	4.11087	61
8457AT2	Strep. salivarius	51	3.93183	51
8457OAN1	Strep. sp002238115	61	4.11087	61
8457OAN3	Strep. infantis	59	4.07754	59
8457OAN4	Strep. infantis	59	4.07754	59
8462T2	Strep.BHI_7	61	4.11087	61
8468AN4	Strep. rubneri	62	4.12713	62
8468DM2	Strep. cristatus	54	3.98898	54
8468DM31	Strep.BHI_8	56	4.02535	56
8468OAN1	Strep. xiaochunlingii	51	3.93183	51
8468OAN3	Strep. infantis	55	4.00733	55
8484A3	Strep. mitis	54	3.98898	54
8484A8	Strep. mitis	61	4.11087	61
8485A2	Strep.BHI_9	61	4.11087	61
8485AN1	Strep. hominis	47	3.85015	47
8485AN10	Strep. hominis	48	3.8712	48
8485AN4	Strep. sp901875575	46	3.82864	46
8485DM3	Strep. parasanguinis	57	4.04305	57
8497AN4	Strep. mitis	59	4.07754	59
8497OA7	Strep. salivarius	55	4.00733	55
8497OA8	Strep. parasanguinis	53	3.97029	53
8498AN14.3	Strep. mitis	60	4.09434	60
8498AN8	Strep. massiliensis	45	3.80666	45
8498OA9	Strep. oralis	60	4.09434	60
8507K3	Strep. anginosus	48	3.8712	48
8507OA5	Strep. sp001813105	61	4.11087	61
8507OAN12	Strep.BHI_8	58	4.06044	58
8511A3	Strep. salivarius	54	3.98898	54
8511A7	Strep. parasanguinis	61	4.11087	61
8511A8	Strep. oralis	67	4.20469	67
8511AN11	Strep. anginosus	48	3.8712	48
8511AN3	Strep. hominis	50	3.91202	50
8512A6.2	Strep. parasanguinis	59	4.07754	59
8512A8	Strep. mitis	63	4.14313	63
8512AN2	Strep. anginosus	48	3.8712	48
8512AN4	Strep. anginosus	48	3.8712	48
8513A10	Strep. gordonii	59	4.07754	59
8513A11	Strep.BHI_10	61	4.11087	61
8513A12	Strep. constellatus	50	3.91202	50
8513A4	Strep. oralis	61	4.11087	61
8513A7	Strep. mutans	49	3.89182	49
8513A9	Strep. mitis	61	4.11087	61
8513AN9.2	Strep. constellatus	50	3.91202	50
8514A10	Strep. vestibularis	46	3.82864	46
8514A11	Strep. oralis	66	4.18965	66
8514A4	Strep. vestibularis	46	3.82864	46
8514A6	Strep. vestibularis	46	3.82864	46
8514A7	Strep. caecimuris	62	4.12713	62
8514A8	Strep. parasanguinis	61	4.11087	61
8514A9	Strep. parasanguinis	61	4.11087	61
8514AN3	Strep. hominis	48	3.8712	48
8515A8	Strep. oralis	58	4.06044	58
8515AN11	Strep. sp029691405	63	4.14313	63
8515AN14	Strep. gordonii	59	4.07754	59
8515AN6	Strep. sanguinis	54	3.98898	54
8524A10	Strep. mitis	60	4.09434	60
8524AN5	Strep. mitis	62	4.12713	62
8524AN6	Strep. mitis	60	4.09434	60
8524AN8	Strep. constellatus	55	4.00733	55
8543A7	Strep. mitis	61	4.11087	61
8543AN1	Strep. anginosus	48	3.8712	48
8543AN4	Strep. constellatus	51	3.93183	51
8607AN3	Strep. anginosus	54	3.98898	54
8633AN2	Strep. anginosus	48	3.8712	48
8633AN4	Strep.BHI_11	52	3.95124	52
8633TD5	Strep. sinensis	53	3.97029	53
8676A3	Strep. mitis	59	4.07754	59
8676A7	Strep. gordonii	58	4.06044	58
8676AN5	Strep. mitis	61	4.11087	61
8676AN8	Strep. pseudopneumoniae	58	4.06044	58
8691AN1	Strep. mitis	58	4.06044	58
8691AN2	Strep. gordonii	58	4.06044	58
8691DM4	Strep. xiaochunlingii	52	3.95124	52

## Sheet: CAZy_fisher_enrichment_cancer
Supplementary Table 6: CAZyme family enrichment analysis
CAZy_Family_Split	Species	Present	Total	Absent	NotInSpecies	p.value	p.adjust
CBM41	Strep. massiliensis	0	100	100	100	2.20876e-59	3.24333e-57
CBM48	Strep. caecimuris	1	101	100	100	5.66036e-58	3.24333e-57
CBM48	Strep. cristatus	1	101	100	100	5.66036e-58	3.24333e-57
CBM48	Strep. massiliensis	1	101	100	100	5.66036e-58	3.24333e-57
CBM48	Strep. mutans	1	101	100	100	5.66036e-58	3.24333e-57
CBM48	Strep. pseudopneumoniae	1	101	100	100	5.66036e-58	3.24333e-57
CBM48	Strep. rubneri	1	101	100	100	5.66036e-58	3.24333e-57
CBM48	Strep. sinensis	1	101	100	100	5.66036e-58	3.24333e-57
CBM48	Strep. sp001556435	1	101	100	100	5.66036e-58	3.24333e-57
CBM48	Strep. sp001813105	1	101	100	100	5.66036e-58	3.24333e-57
CBM48	Strep. sp002238115	1	101	100	100	5.66036e-58	3.24333e-57
CBM48	Strep. sp013394695	1	101	100	100	5.66036e-58	3.24333e-57
CBM48	Strep. sp029691405	1	101	100	100	5.66036e-58	3.24333e-57
CBM48	Strep. sp901875575	1	101	100	100	5.66036e-58	3.24333e-57
CBM48	Strep.BHI_1	1	101	100	100	5.66036e-58	3.24333e-57
CBM48	Strep.BHI_10	1	101	100	100	5.66036e-58	3.24333e-57
CBM48	Strep.BHI_11	1	101	100	100	5.66036e-58	3.24333e-57
CBM48	Strep.BHI_2	1	101	100	100	5.66036e-58	3.24333e-57
CBM48	Strep.BHI_3	1	101	100	100	5.66036e-58	3.24333e-57
CBM48	Strep.BHI_4	1	101	100	100	5.66036e-58	3.24333e-57
CBM48	Strep.BHI_5	1	101	100	100	5.66036e-58	3.24333e-57
CBM48	Strep.BHI_6	1	101	100	100	5.66036e-58	3.24333e-57
CBM48	Strep.BHI_7	1	101	100	100	5.66036e-58	3.24333e-57
CBM48	Strep.BHI_9	1	101	100	100	5.66036e-58	3.24333e-57
CBM50	Strep. caecimuris	1	101	100	100	5.66036e-58	3.24333e-57
CBM50	Strep. cristatus	1	101	100	100	5.66036e-58	3.24333e-57
CBM50	Strep. massiliensis	1	101	100	100	5.66036e-58	3.24333e-57
CBM50	Strep. mutans	1	101	100	100	5.66036e-58	3.24333e-57
CBM50	Strep. pseudopneumoniae	1	101	100	100	5.66036e-58	3.24333e-57
CBM50	Strep. rubneri	1	101	100	100	5.66036e-58	3.24333e-57
CBM50	Strep. sinensis	1	101	100	100	5.66036e-58	3.24333e-57
CBM50	Strep. sp001556435	1	101	100	100	5.66036e-58	3.24333e-57
CBM50	Strep. sp001813105	1	101	100	100	5.66036e-58	3.24333e-57
CBM50	Strep. sp002238115	1	101	100	100	5.66036e-58	3.24333e-57
CBM50	Strep. sp013394695	1	101	100	100	5.66036e-58	3.24333e-57
CBM50	Strep. sp029691405	1	101	100	100	5.66036e-58	3.24333e-57
CBM50	Strep. sp901875575	1	101	100	100	5.66036e-58	3.24333e-57
CBM50	Strep.BHI_1	1	101	100	100	5.66036e-58	3.24333e-57
CBM50	Strep.BHI_10	1	101	100	100	5.66036e-58	3.24333e-57
CBM50	Strep.BHI_11	1	101	100	100	5.66036e-58	3.24333e-57
CBM50	Strep.BHI_2	1	101	100	100	5.66036e-58	3.24333e-57
CBM50	Strep.BHI_3	1	101	100	100	5.66036e-58	3.24333e-57
CBM50	Strep.BHI_4	1	101	100	100	5.66036e-58	3.24333e-57
CBM50	Strep.BHI_5	1	101	100	100	5.66036e-58	3.24333e-57
CBM50	Strep.BHI_6	1	101	100	100	5.66036e-58	3.24333e-57
CBM50	Strep.BHI_7	1	101	100	100	5.66036e-58	3.24333e-57
CBM50	Strep.BHI_9	1	101	100	100	5.66036e-58	3.24333e-57
CE4	Strep. caecimuris	1	101	100	100	5.66036e-58	3.24333e-57
CE4	Strep. cristatus	1	101	100	100	5.66036e-58	3.24333e-57
CE4	Strep. massiliensis	1	101	100	100	5.66036e-58	3.24333e-57
CE4	Strep. mutans	1	101	100	100	5.66036e-58	3.24333e-57
CE4	Strep. pseudopneumoniae	1	101	100	100	5.66036e-58	3.24333e-57
CE4	Strep. rubneri	1	101	100	100	5.66036e-58	3.24333e-57
CE4	Strep. sinensis	1	101	100	100	5.66036e-58	3.24333e-57
CE4	Strep. sp001556435	1	101	100	100	5.66036e-58	3.24333e-57
CE4	Strep. sp001813105	1	101	100	100	5.66036e-58	3.24333e-57
CE4	Strep. sp002238115	1	101	100	100	5.66036e-58	3.24333e-57
CE4	Strep. sp013394695	1	101	100	100	5.66036e-58	3.24333e-57
CE4	Strep. sp029691405	1	101	100	100	5.66036e-58	3.24333e-57
CE4	Strep. sp901875575	1	101	100	100	5.66036e-58	3.24333e-57
CE4	Strep.BHI_1	1	101	100	100	5.66036e-58	3.24333e-57
CE4	Strep.BHI_10	1	101	100	100	5.66036e-58	3.24333e-57
CE4	Strep.BHI_11	1	101	100	100	5.66036e-58	3.24333e-57
CE4	Strep.BHI_2	1	101	100	100	5.66036e-58	3.24333e-57
CE4	Strep.BHI_3	1	101	100	100	5.66036e-58	3.24333e-57
CE4	Strep.BHI_4	1	101	100	100	5.66036e-58	3.24333e-57
CE4	Strep.BHI_5	1	101	100	100	5.66036e-58	3.24333e-57
CE4	Strep.BHI_6	1	101	100	100	5.66036e-58	3.24333e-57
CE4	Strep.BHI_7	1	101	100	100	5.66036e-58	3.24333e-57
CE4	Strep.BHI_9	1	101	100	100	5.66036e-58	3.24333e-57
CE9	Strep. caecimuris	1	101	100	100	5.66036e-58	3.24333e-57
CE9	Strep. cristatus	1	101	100	100	5.66036e-58	3.24333e-57
CE9	Strep. massiliensis	1	101	100	100	5.66036e-58	3.24333e-57
CE9	Strep. mutans	1	101	100	100	5.66036e-58	3.24333e-57
CE9	Strep. pseudopneumoniae	1	101	100	100	5.66036e-58	3.24333e-57
CE9	Strep. rubneri	1	101	100	100	5.66036e-58	3.24333e-57
CE9	Strep. sinensis	1	101	100	100	5.66036e-58	3.24333e-57
CE9	Strep. sp001556435	1	101	100	100	5.66036e-58	3.24333e-57
CE9	Strep. sp001813105	1	101	100	100	5.66036e-58	3.24333e-57
CE9	Strep. sp002238115	1	101	100	100	5.66036e-58	3.24333e-57
CE9	Strep. sp013394695	1	101	100	100	5.66036e-58	3.24333e-57
CE9	Strep. sp029691405	1	101	100	100	5.66036e-58	3.24333e-57
CE9	Strep. sp901875575	1	101	100	100	5.66036e-58	3.24333e-57
CE9	Strep.BHI_1	1	101	100	100	5.66036e-58	3.24333e-57
CE9	Strep.BHI_10	1	101	100	100	5.66036e-58	3.24333e-57
CE9	Strep.BHI_11	1	101	100	100	5.66036e-58	3.24333e-57
CE9	Strep.BHI_2	1	101	100	100	5.66036e-58	3.24333e-57
CE9	Strep.BHI_3	1	101	100	100	5.66036e-58	3.24333e-57
CE9	Strep.BHI_4	1	101	100	100	5.66036e-58	3.24333e-57
CE9	Strep.BHI_5	1	101	100	100	5.66036e-58	3.24333e-57
CE9	Strep.BHI_6	1	101	100	100	5.66036e-58	3.24333e-57
CE9	Strep.BHI_7	1	101	100	100	5.66036e-58	3.24333e-57
CE9	Strep.BHI_9	1	101	100	100	5.66036e-58	3.24333e-57
GH1	Strep. caecimuris	1	101	100	100	5.66036e-58	3.24333e-57
GH1	Strep. cristatus	1	101	100	100	5.66036e-58	3.24333e-57
GH1	Strep. massiliensis	1	101	100	100	5.66036e-58	3.24333e-57
GH1	Strep. mutans	1	101	100	100	5.66036e-58	3.24333e-57
GH1	Strep. pseudopneumoniae	1	101	100	100	5.66036e-58	3.24333e-57
GH1	Strep. rubneri	1	101	100	100	5.66036e-58	3.24333e-57
GH1	Strep. sinensis	1	101	100	100	5.66036e-58	3.24333e-57
GH1	Strep. sp001556435	1	101	100	100	5.66036e-58	3.24333e-57
GH1	Strep. sp001813105	1	101	100	100	5.66036e-58	3.24333e-57
GH1	Strep. sp002238115	1	101	100	100	5.66036e-58	3.24333e-57
GH1	Strep. sp013394695	1	101	100	100	5.66036e-58	3.24333e-57
GH1	Strep. sp029691405	1	101	100	100	5.66036e-58	3.24333e-57
GH1	Strep. sp901875575	1	101	100	100	5.66036e-58	3.24333e-57
GH1	Strep.BHI_1	1	101	100	100	5.66036e-58	3.24333e-57
GH1	Strep.BHI_10	1	101	100	100	5.66036e-58	3.24333e-57
GH1	Strep.BHI_11	1	101	100	100	5.66036e-58	3.24333e-57
GH1	Strep.BHI_2	1	101	100	100	5.66036e-58	3.24333e-57
GH1	Strep.BHI_3	1	101	100	100	5.66036e-58	3.24333e-57
GH1	Strep.BHI_4	1	101	100	100	5.66036e-58	3.24333e-57
GH1	Strep.BHI_5	1	101	100	100	5.66036e-58	3.24333e-57
GH1	Strep.BHI_6	1	101	100	100	5.66036e-58	3.24333e-57
GH1	Strep.BHI_7	1	101	100	100	5.66036e-58	3.24333e-57
GH1	Strep.BHI_9	1	101	100	100	5.66036e-58	3.24333e-57
GH13	Strep. caecimuris	1	101	100	100	5.66036e-58	3.24333e-57
GH13	Strep. cristatus	1	101	100	100	5.66036e-58	3.24333e-57
GH13	Strep. massiliensis	1	101	100	100	5.66036e-58	3.24333e-57
GH13	Strep. mutans	1	101	100	100	5.66036e-58	3.24333e-57
GH13	Strep. pseudopneumoniae	1	101	100	100	5.66036e-58	3.24333e-57
GH13	Strep. rubneri	1	101	100	100	5.66036e-58	3.24333e-57
GH13	Strep. sinensis	1	101	100	100	5.66036e-58	3.24333e-57
GH13	Strep. sp001556435	1	101	100	100	5.66036e-58	3.24333e-57
GH13	Strep. sp001813105	1	101	100	100	5.66036e-58	3.24333e-57
GH13	Strep. sp002238115	1	101	100	100	5.66036e-58	3.24333e-57
GH13	Strep. sp013394695	1	101	100	100	5.66036e-58	3.24333e-57
GH13	Strep. sp029691405	1	101	100	100	5.66036e-58	3.24333e-57
GH13	Strep. sp901875575	1	101	100	100	5.66036e-58	3.24333e-57
GH13	Strep.BHI_1	1	101	100	100	5.66036e-58	3.24333e-57
GH13	Strep.BHI_10	1	101	100	100	5.66036e-58	3.24333e-57
GH13	Strep.BHI_11	1	101	100	100	5.66036e-58	3.24333e-57
GH13	Strep.BHI_2	1	101	100	100	5.66036e-58	3.24333e-57
GH13	Strep.BHI_3	1	101	100	100	5.66036e-58	3.24333e-57
GH13	Strep.BHI_4	1	101	100	100	5.66036e-58	3.24333e-57
GH13	Strep.BHI_5	1	101	100	100	5.66036e-58	3.24333e-57
GH13	Strep.BHI_6	1	101	100	100	5.66036e-58	3.24333e-57
GH13	Strep.BHI_7	1	101	100	100	5.66036e-58	3.24333e-57
GH13	Strep.BHI_9	1	101	100	100	5.66036e-58	3.24333e-57
GH13_11	Strep. caecimuris	1	101	100	100	5.66036e-58	3.24333e-57
GH13_11	Strep. cristatus	1	101	100	100	5.66036e-58	3.24333e-57
GH13_11	Strep. massiliensis	1	101	100	100	5.66036e-58	3.24333e-57
GH13_11	Strep. mutans	1	101	100	100	5.66036e-58	3.24333e-57
GH13_11	Strep. pseudopneumoniae	1	101	100	100	5.66036e-58	3.24333e-57
GH13_11	Strep. rubneri	1	101	100	100	5.66036e-58	3.24333e-57
GH13_11	Strep. sinensis	1	101	100	100	5.66036e-58	3.24333e-57
GH13_11	Strep. sp001556435	1	101	100	100	5.66036e-58	3.24333e-57
GH13_11	Strep. sp001813105	1	101	100	100	5.66036e-58	3.24333e-57
GH13_11	Strep. sp002238115	1	101	100	100	5.66036e-58	3.24333e-57
GH13_11	Strep. sp013394695	1	101	100	100	5.66036e-58	3.24333e-57
GH13_11	Strep. sp029691405	1	101	100	100	5.66036e-58	3.24333e-57
GH13_11	Strep. sp901875575	1	101	100	100	5.66036e-58	3.24333e-57
GH13_11	Strep.BHI_1	1	101	100	100	5.66036e-58	3.24333e-57
GH13_11	Strep.BHI_10	1	101	100	100	5.66036e-58	3.24333e-57
GH13_11	Strep.BHI_11	1	101	100	100	5.66036e-58	3.24333e-57
GH13_11	Strep.BHI_2	1	101	100	100	5.66036e-58	3.24333e-57
GH13_11	Strep.BHI_3	1	101	100	100	5.66036e-58	3.24333e-57
GH13_11	Strep.BHI_4	1	101	100	100	5.66036e-58	3.24333e-57
GH13_11	Strep.BHI_5	1	101	100	100	5.66036e-58	3.24333e-57
GH13_11	Strep.BHI_6	1	101	100	100	5.66036e-58	3.24333e-57
GH13_11	Strep.BHI_7	1	101	100	100	5.66036e-58	3.24333e-57
GH13_11	Strep.BHI_9	1	101	100	100	5.66036e-58	3.24333e-57
GH13_14	Strep. caecimuris	1	101	100	100	5.66036e-58	3.24333e-57
GH13_14	Strep. cristatus	1	101	100	100	5.66036e-58	3.24333e-57
GH13_14	Strep. massiliensis	1	101	100	100	5.66036e-58	3.24333e-57
GH13_14	Strep. mutans	1	101	100	100	5.66036e-58	3.24333e-57
GH13_14	Strep. pseudopneumoniae	1	101	100	100	5.66036e-58	3.24333e-57
GH13_14	Strep. rubneri	1	101	100	100	5.66036e-58	3.24333e-57
GH13_14	Strep. sinensis	1	101	100	100	5.66036e-58	3.24333e-57
GH13_14	Strep. sp001556435	1	101	100	100	5.66036e-58	3.24333e-57
GH13_14	Strep. sp001813105	1	101	100	100	5.66036e-58	3.24333e-57
GH13_14	Strep. sp002238115	1	101	100	100	5.66036e-58	3.24333e-57
GH13_14	Strep. sp013394695	1	101	100	100	5.66036e-58	3.24333e-57
GH13_14	Strep. sp029691405	1	101	100	100	5.66036e-58	3.24333e-57
GH13_14	Strep. sp901875575	1	101	100	100	5.66036e-58	3.24333e-57
GH13_14	Strep.BHI_1	1	101	100	100	5.66036e-58	3.24333e-57
GH13_14	Strep.BHI_10	1	101	100	100	5.66036e-58	3.24333e-57
GH13_14	Strep.BHI_11	1	101	100	100	5.66036e-58	3.24333e-57
GH13_14	Strep.BHI_2	1	101	100	100	5.66036e-58	3.24333e-57
GH13_14	Strep.BHI_3	1	101	100	100	5.66036e-58	3.24333e-57
GH13_14	Strep.BHI_4	1	101	100	100	5.66036e-58	3.24333e-57
GH13_14	Strep.BHI_5	1	101	100	100	5.66036e-58	3.24333e-57
GH13_14	Strep.BHI_6	1	101	100	100	5.66036e-58	3.24333e-57
GH13_14	Strep.BHI_7	1	101	100	100	5.66036e-58	3.24333e-57
GH13_14	Strep.BHI_9	1	101	100	100	5.66036e-58	3.24333e-57
GH13_31	Strep. caecimuris	1	101	100	100	5.66036e-58	3.24333e-57
GH13_31	Strep. cristatus	1	101	100	100	5.66036e-58	3.24333e-57
GH13_31	Strep. massiliensis	1	101	100	100	5.66036e-58	3.24333e-57
GH13_31	Strep. mutans	1	101	100	100	5.66036e-58	3.24333e-57
GH13_31	Strep. pseudopneumoniae	1	101	100	100	5.66036e-58	3.24333e-57
GH13_31	Strep. rubneri	1	101	100	100	5.66036e-58	3.24333e-57
GH13_31	Strep. sinensis	1	101	100	100	5.66036e-58	3.24333e-57
GH13_31	Strep. sp001556435	1	101	100	100	5.66036e-58	3.24333e-57
GH13_31	Strep. sp001813105	1	101	100	100	5.66036e-58	3.24333e-57
GH13_31	Strep. sp002238115	1	101	100	100	5.66036e-58	3.24333e-57
GH13_31	Strep. sp013394695	1	101	100	100	5.66036e-58	3.24333e-57
GH13_31	Strep. sp029691405	1	101	100	100	5.66036e-58	3.24333e-57
GH13_31	Strep. sp901875575	1	101	100	100	5.66036e-58	3.24333e-57
GH13_31	Strep.BHI_1	1	101	100	100	5.66036e-58	3.24333e-57
GH13_31	Strep.BHI_10	1	101	100	100	5.66036e-58	3.24333e-57
GH13_31	Strep.BHI_11	1	101	100	100	5.66036e-58	3.24333e-57
GH13_31	Strep.BHI_2	1	101	100	100	5.66036e-58	3.24333e-57
GH13_31	Strep.BHI_3	1	101	100	100	5.66036e-58	3.24333e-57
GH13_31	Strep.BHI_4	1	101	100	100	5.66036e-58	3.24333e-57
GH13_31	Strep.BHI_5	1	101	100	100	5.66036e-58	3.24333e-57
GH13_31	Strep.BHI_6	1	101	100	100	5.66036e-58	3.24333e-57
GH13_31	Strep.BHI_7	1	101	100	100	5.66036e-58	3.24333e-57
GH13_31	Strep.BHI_9	1	101	100	100	5.66036e-58	3.24333e-57
GH13_5	Strep. caecimuris	1	101	100	100	5.66036e-58	3.24333e-57
GH13_5	Strep. cristatus	1	101	100	100	5.66036e-58	3.24333e-57
GH13_5	Strep. massiliensis	1	101	100	100	5.66036e-58	3.24333e-57
GH13_5	Strep. mutans	1	101	100	100	5.66036e-58	3.24333e-57
GH13_5	Strep. pseudopneumoniae	1	101	100	100	5.66036e-58	3.24333e-57
GH13_5	Strep. rubneri	1	101	100	100	5.66036e-58	3.24333e-57
GH13_5	Strep. sinensis	1	101	100	100	5.66036e-58	3.24333e-57
GH13_5	Strep. sp001556435	1	101	100	100	5.66036e-58	3.24333e-57
GH13_5	Strep. sp001813105	1	101	100	100	5.66036e-58	3.24333e-57
GH13_5	Strep. sp002238115	1	101	100	100	5.66036e-58	3.24333e-57
GH13_5	Strep. sp013394695	1	101	100	100	5.66036e-58	3.24333e-57
GH13_5	Strep. sp029691405	1	101	100	100	5.66036e-58	3.24333e-57
GH13_5	Strep. sp901875575	1	101	100	100	5.66036e-58	3.24333e-57
GH13_5	Strep.BHI_1	1	101	100	100	5.66036e-58	3.24333e-57
GH13_5	Strep.BHI_10	1	101	100	100	5.66036e-58	3.24333e-57
GH13_5	Strep.BHI_11	1	101	100	100	5.66036e-58	3.24333e-57
GH13_5	Strep.BHI_2	1	101	100	100	5.66036e-58	3.24333e-57
GH13_5	Strep.BHI_3	1	101	100	100	5.66036e-58	3.24333e-57
GH13_5	Strep.BHI_4	1	101	100	100	5.66036e-58	3.24333e-57
GH13_5	Strep.BHI_5	1	101	100	100	5.66036e-58	3.24333e-57
GH13_5	Strep.BHI_6	1	101	100	100	5.66036e-58	3.24333e-57
GH13_5	Strep.BHI_7	1	101	100	100	5.66036e-58	3.24333e-57
GH13_5	Strep.BHI_9	1	101	100	100	5.66036e-58	3.24333e-57
GH13_9	Strep. caecimuris	1	101	100	100	5.66036e-58	3.24333e-57
GH13_9	Strep. cristatus	1	101	100	100	5.66036e-58	3.24333e-57
GH13_9	Strep. massiliensis	1	101	100	100	5.66036e-58	3.24333e-57
GH13_9	Strep. mutans	1	101	100	100	5.66036e-58	3.24333e-57
GH13_9	Strep. pseudopneumoniae	1	101	100	100	5.66036e-58	3.24333e-57
GH13_9	Strep. rubneri	1	101	100	100	5.66036e-58	3.24333e-57
GH13_9	Strep. sinensis	1	101	100	100	5.66036e-58	3.24333e-57
GH13_9	Strep. sp001556435	1	101	100	100	5.66036e-58	3.24333e-57
GH13_9	Strep. sp001813105	1	101	100	100	5.66036e-58	3.24333e-57
GH13_9	Strep. sp002238115	1	101	100	100	5.66036e-58	3.24333e-57
GH13_9	Strep. sp013394695	1	101	100	100	5.66036e-58	3.24333e-57
GH13_9	Strep. sp029691405	1	101	100	100	5.66036e-58	3.24333e-57
GH13_9	Strep. sp901875575	1	101	100	100	5.66036e-58	3.24333e-57
GH13_9	Strep.BHI_1	1	101	100	100	5.66036e-58	3.24333e-57
GH13_9	Strep.BHI_10	1	101	100	100	5.66036e-58	3.24333e-57
GH13_9	Strep.BHI_11	1	101	100	100	5.66036e-58	3.24333e-57
GH13_9	Strep.BHI_2	1	101	100	100	5.66036e-58	3.24333e-57
GH13_9	Strep.BHI_3	1	101	100	100	5.66036e-58	3.24333e-57
GH13_9	Strep.BHI_4	1	101	100	100	5.66036e-58	3.24333e-57
GH13_9	Strep.BHI_5	1	101	100	100	5.66036e-58	3.24333e-57
GH13_9	Strep.BHI_6	1	101	100	100	5.66036e-58	3.24333e-57
GH13_9	Strep.BHI_7	1	101	100	100	5.66036e-58	3.24333e-57
GH13_9	Strep.BHI_9	1	101	100	100	5.66036e-58	3.24333e-57
GH23	Strep. caecimuris	1	101	100	100	5.66036e-58	3.24333e-57
GH23	Strep. cristatus	1	101	100	100	5.66036e-58	3.24333e-57
GH23	Strep. massiliensis	1	101	100	100	5.66036e-58	3.24333e-57
GH23	Strep. mutans	1	101	100	100	5.66036e-58	3.24333e-57
GH23	Strep. pseudopneumoniae	1	101	100	100	5.66036e-58	3.24333e-57
GH23	Strep. rubneri	1	101	100	100	5.66036e-58	3.24333e-57
GH23	Strep. sinensis	1	101	100	100	5.66036e-58	3.24333e-57
GH23	Strep. sp001556435	1	101	100	100	5.66036e-58	3.24333e-57
GH23	Strep. sp001813105	1	101	100	100	5.66036e-58	3.24333e-57
GH23	Strep. sp002238115	1	101	100	100	5.66036e-58	3.24333e-57
GH23	Strep. sp013394695	1	101	100	100	5.66036e-58	3.24333e-57
GH23	Strep. sp029691405	1	101	100	100	5.66036e-58	3.24333e-57
GH23	Strep. sp901875575	1	101	100	100	5.66036e-58	3.24333e-57
GH23	Strep.BHI_1	1	101	100	100	5.66036e-58	3.24333e-57
GH23	Strep.BHI_10	1	101	100	100	5.66036e-58	3.24333e-57
GH23	Strep.BHI_11	1	101	100	100	5.66036e-58	3.24333e-57
GH23	Strep.BHI_2	1	101	100	100	5.66036e-58	3.24333e-57
GH23	Strep.BHI_3	1	101	100	100	5.66036e-58	3.24333e-57
GH23	Strep.BHI_4	1	101	100	100	5.66036e-58	3.24333e-57
GH23	Strep.BHI_5	1	101	100	100	5.66036e-58	3.24333e-57
GH23	Strep.BHI_6	1	101	100	100	5.66036e-58	3.24333e-57
GH23	Strep.BHI_7	1	101	100	100	5.66036e-58	3.24333e-57
GH23	Strep.BHI_9	1	101	100	100	5.66036e-58	3.24333e-57
GH25	Strep. caecimuris	1	101	100	100	5.66036e-58	3.24333e-57
GH25	Strep. cristatus	1	101	100	100	5.66036e-58	3.24333e-57
GH25	Strep. massiliensis	1	101	100	100	5.66036e-58	3.24333e-57
GH25	Strep. mutans	1	101	100	100	5.66036e-58	3.24333e-57
GH25	Strep. pseudopneumoniae	1	101	100	100	5.66036e-58	3.24333e-57
GH25	Strep. rubneri	1	101	100	100	5.66036e-58	3.24333e-57
GH25	Strep. sinensis	1	101	100	100	5.66036e-58	3.24333e-57
GH25	Strep. sp001556435	1	101	100	100	5.66036e-58	3.24333e-57
GH25	Strep. sp001813105	1	101	100	100	5.66036e-58	3.24333e-57
GH25	Strep. sp002238115	1	101	100	100	5.66036e-58	3.24333e-57
GH25	Strep. sp013394695	1	101	100	100	5.66036e-58	3.24333e-57
GH25	Strep. sp029691405	1	101	100	100	5.66036e-58	3.24333e-57
GH25	Strep. sp901875575	1	101	100	100	5.66036e-58	3.24333e-57
GH25	Strep.BHI_1	1	101	100	100	5.66036e-58	3.24333e-57
GH25	Strep.BHI_10	1	101	100	100	5.66036e-58	3.24333e-57
GH25	Strep.BHI_11	1	101	100	100	5.66036e-58	3.24333e-57
GH25	Strep.BHI_2	1	101	100	100	5.66036e-58	3.24333e-57
GH25	Strep.BHI_3	1	101	100	100	5.66036e-58	3.24333e-57
GH25	Strep.BHI_4	1	101	100	100	5.66036e-58	3.24333e-57
GH25	Strep.BHI_5	1	101	100	100	5.66036e-58	3.24333e-57
GH25	Strep.BHI_6	1	101	100	100	5.66036e-58	3.24333e-57
GH25	Strep.BHI_7	1	101	100	100	5.66036e-58	3.24333e-57
GH25	Strep.BHI_9	1	101	100	100	5.66036e-58	3.24333e-57
GH28	Strep. caecimuris	1	101	100	100	5.66036e-58	3.24333e-57
GH28	Strep. cristatus	1	101	100	100	5.66036e-58	3.24333e-57
GH28	Strep. massiliensis	1	101	100	100	5.66036e-58	3.24333e-57
GH28	Strep. mutans	1	101	100	100	5.66036e-58	3.24333e-57
GH28	Strep. pseudopneumoniae	1	101	100	100	5.66036e-58	3.24333e-57
GH28	Strep. rubneri	1	101	100	100	5.66036e-58	3.24333e-57
GH28	Strep. sinensis	1	101	100	100	5.66036e-58	3.24333e-57
GH28	Strep. sp001556435	1	101	100	100	5.66036e-58	3.24333e-57
GH28	Strep. sp001813105	1	101	100	100	5.66036e-58	3.24333e-57
GH28	Strep. sp002238115	1	101	100	100	5.66036e-58	3.24333e-57
GH28	Strep. sp013394695	1	101	100	100	5.66036e-58	3.24333e-57
GH28	Strep. sp029691405	1	101	100	100	5.66036e-58	3.24333e-57
GH28	Strep. sp901875575	1	101	100	100	5.66036e-58	3.24333e-57
GH28	Strep.BHI_1	1	101	100	100	5.66036e-58	3.24333e-57
GH28	Strep.BHI_10	1	101	100	100	5.66036e-58	3.24333e-57
GH28	Strep.BHI_11	1	101	100	100	5.66036e-58	3.24333e-57
GH28	Strep.BHI_2	1	101	100	100	5.66036e-58	3.24333e-57
GH28	Strep.BHI_3	1	101	100	100	5.66036e-58	3.24333e-57
GH28	Strep.BHI_4	1	101	100	100	5.66036e-58	3.24333e-57
GH28	Strep.BHI_5	1	101	100	100	5.66036e-58	3.24333e-57
GH28	Strep.BHI_6	1	101	100	100	5.66036e-58	3.24333e-57
GH28	Strep.BHI_7	1	101	100	100	5.66036e-58	3.24333e-57
GH28	Strep.BHI_9	1	101	100	100	5.66036e-58	3.24333e-57
GH32	Strep. caecimuris	1	101	100	100	5.66036e-58	3.24333e-57
GH32	Strep. cristatus	1	101	100	100	5.66036e-58	3.24333e-57
GH32	Strep. massiliensis	1	101	100	100	5.66036e-58	3.24333e-57
GH32	Strep. mutans	1	101	100	100	5.66036e-58	3.24333e-57
GH32	Strep. pseudopneumoniae	1	101	100	100	5.66036e-58	3.24333e-57
GH32	Strep. rubneri	1	101	100	100	5.66036e-58	3.24333e-57
GH32	Strep. sinensis	1	101	100	100	5.66036e-58	3.24333e-57
GH32	Strep. sp001556435	1	101	100	100	5.66036e-58	3.24333e-57
GH32	Strep. sp001813105	1	101	100	100	5.66036e-58	3.24333e-57
GH32	Strep. sp002238115	1	101	100	100	5.66036e-58	3.24333e-57
GH32	Strep. sp013394695	1	101	100	100	5.66036e-58	3.24333e-57
GH32	Strep. sp029691405	1	101	100	100	5.66036e-58	3.24333e-57
GH32	Strep. sp901875575	1	101	100	100	5.66036e-58	3.24333e-57
GH32	Strep.BHI_1	1	101	100	100	5.66036e-58	3.24333e-57
GH32	Strep.BHI_10	1	101	100	100	5.66036e-58	3.24333e-57
GH32	Strep.BHI_11	1	101	100	100	5.66036e-58	3.24333e-57
GH32	Strep.BHI_2	1	101	100	100	5.66036e-58	3.24333e-57
GH32	Strep.BHI_3	1	101	100	100	5.66036e-58	3.24333e-57
GH32	Strep.BHI_4	1	101	100	100	5.66036e-58	3.24333e-57
GH32	Strep.BHI_5	1	101	100	100	5.66036e-58	3.24333e-57
GH32	Strep.BHI_6	1	101	100	100	5.66036e-58	3.24333e-57
GH32	Strep.BHI_7	1	101	100	100	5.66036e-58	3.24333e-57
GH32	Strep.BHI_9	1	101	100	100	5.66036e-58	3.24333e-57
GH38	Strep. caecimuris	1	101	100	100	5.66036e-58	3.24333e-57
GH38	Strep. cristatus	1	101	100	100	5.66036e-58	3.24333e-57
GH38	Strep. massiliensis	1	101	100	100	5.66036e-58	3.24333e-57
GH38	Strep. mutans	1	101	100	100	5.66036e-58	3.24333e-57
GH38	Strep. pseudopneumoniae	1	101	100	100	5.66036e-58	3.24333e-57
GH38	Strep. rubneri	1	101	100	100	5.66036e-58	3.24333e-57
GH38	Strep. sinensis	1	101	100	100	5.66036e-58	3.24333e-57
GH38	Strep. sp001556435	1	101	100	100	5.66036e-58	3.24333e-57
GH38	Strep. sp001813105	1	101	100	100	5.66036e-58	3.24333e-57
GH38	Strep. sp002238115	1	101	100	100	5.66036e-58	3.24333e-57
GH38	Strep. sp013394695	1	101	100	100	5.66036e-58	3.24333e-57
GH38	Strep. sp029691405	1	101	100	100	5.66036e-58	3.24333e-57
GH38	Strep. sp901875575	1	101	100	100	5.66036e-58	3.24333e-57
GH38	Strep.BHI_1	1	101	100	100	5.66036e-58	3.24333e-57
GH38	Strep.BHI_10	1	101	100	100	5.66036e-58	3.24333e-57
GH38	Strep.BHI_11	1	101	100	100	5.66036e-58	3.24333e-57
GH38	Strep.BHI_2	1	101	100	100	5.66036e-58	3.24333e-57
GH38	Strep.BHI_3	1	101	100	100	5.66036e-58	3.24333e-57
GH38	Strep.BHI_4	1	101	100	100	5.66036e-58	3.24333e-57
GH38	Strep.BHI_5	1	101	100	100	5.66036e-58	3.24333e-57
GH38	Strep.BHI_6	1	101	100	100	5.66036e-58	3.24333e-57
GH38	Strep.BHI_7	1	101	100	100	5.66036e-58	3.24333e-57
GH38	Strep.BHI_9	1	101	100	100	5.66036e-58	3.24333e-57
GH5_11	Strep. caecimuris	1	101	100	100	5.66036e-58	3.24333e-57
GH5_11	Strep. cristatus	1	101	100	100	5.66036e-58	3.24333e-57
GH5_11	Strep. massiliensis	1	101	100	100	5.66036e-58	3.24333e-57
GH5_11	Strep. mutans	1	101	100	100	5.66036e-58	3.24333e-57
GH5_11	Strep. pseudopneumoniae	1	101	100	100	5.66036e-58	3.24333e-57
GH5_11	Strep. rubneri	1	101	100	100	5.66036e-58	3.24333e-57
GH5_11	Strep. sinensis	1	101	100	100	5.66036e-58	3.24333e-57
GH5_11	Strep. sp001556435	1	101	100	100	5.66036e-58	3.24333e-57
GH5_11	Strep. sp001813105	1	101	100	100	5.66036e-58	3.24333e-57
GH5_11	Strep. sp002238115	1	101	100	100	5.66036e-58	3.24333e-57
GH5_11	Strep. sp013394695	1	101	100	100	5.66036e-58	3.24333e-57
GH5_11	Strep. sp029691405	1	101	100	100	5.66036e-58	3.24333e-57
GH5_11	Strep. sp901875575	1	101	100	100	5.66036e-58	3.24333e-57
GH5_11	Strep.BHI_1	1	101	100	100	5.66036e-58	3.24333e-57
GH5_11	Strep.BHI_10	1	101	100	100	5.66036e-58	3.24333e-57
GH5_11	Strep.BHI_11	1	101	100	100	5.66036e-58	3.24333e-57
GH5_11	Strep.BHI_2	1	101	100	100	5.66036e-58	3.24333e-57
GH5_11	Strep.BHI_3	1	101	100	100	5.66036e-58	3.24333e-57
GH5_11	Strep.BHI_4	1	101	100	100	5.66036e-58	3.24333e-57
GH5_11	Strep.BHI_5	1	101	100	100	5.66036e-58	3.24333e-57
GH5_11	Strep.BHI_6	1	101	100	100	5.66036e-58	3.24333e-57
GH5_11	Strep.BHI_7	1	101	100	100	5.66036e-58	3.24333e-57
GH5_11	Strep.BHI_9	1	101	100	100	5.66036e-58	3.24333e-57
GH77	Strep. caecimuris	1	101	100	100	5.66036e-58	3.24333e-57
GH77	Strep. cristatus	1	101	100	100	5.66036e-58	3.24333e-57
GH77	Strep. massiliensis	1	101	100	100	5.66036e-58	3.24333e-57
GH77	Strep. mutans	1	101	100	100	5.66036e-58	3.24333e-57
GH77	Strep. pseudopneumoniae	1	101	100	100	5.66036e-58	3.24333e-57
GH77	Strep. rubneri	1	101	100	100	5.66036e-58	3.24333e-57
GH77	Strep. sinensis	1	101	100	100	5.66036e-58	3.24333e-57
GH77	Strep. sp001556435	1	101	100	100	5.66036e-58	3.24333e-57
GH77	Strep. sp001813105	1	101	100	100	5.66036e-58	3.24333e-57
GH77	Strep. sp002238115	1	101	100	100	5.66036e-58	3.24333e-57
GH77	Strep. sp013394695	1	101	100	100	5.66036e-58	3.24333e-57
GH77	Strep. sp029691405	1	101	100	100	5.66036e-58	3.24333e-57
GH77	Strep. sp901875575	1	101	100	100	5.66036e-58	3.24333e-57
GH77	Strep.BHI_1	1	101	100	100	5.66036e-58	3.24333e-57
GH77	Strep.BHI_10	1	101	100	100	5.66036e-58	3.24333e-57
GH77	Strep.BHI_11	1	101	100	100	5.66036e-58	3.24333e-57
GH77	Strep.BHI_2	1	101	100	100	5.66036e-58	3.24333e-57
GH77	Strep.BHI_3	1	101	100	100	5.66036e-58	3.24333e-57
GH77	Strep.BHI_4	1	101	100	100	5.66036e-58	3.24333e-57
GH77	Strep.BHI_5	1	101	100	100	5.66036e-58	3.24333e-57
GH77	Strep.BHI_6	1	101	100	100	5.66036e-58	3.24333e-57
GH77	Strep.BHI_7	1	101	100	100	5.66036e-58	3.24333e-57
GH77	Strep.BHI_9	1	101	100	100	5.66036e-58	3.24333e-57
GH84	Strep. caecimuris	1	101	100	100	5.66036e-58	3.24333e-57
GH84	Strep. cristatus	1	101	100	100	5.66036e-58	3.24333e-57
GH84	Strep. massiliensis	1	101	100	100	5.66036e-58	3.24333e-57
GH84	Strep. mutans	1	101	100	100	5.66036e-58	3.24333e-57
GH84	Strep. pseudopneumoniae	1	101	100	100	5.66036e-58	3.24333e-57
GH84	Strep. rubneri	1	101	100	100	5.66036e-58	3.24333e-57
GH84	Strep. sinensis	1	101	100	100	5.66036e-58	3.24333e-57
GH84	Strep. sp001556435	1	101	100	100	5.66036e-58	3.24333e-57
GH84	Strep. sp001813105	1	101	100	100	5.66036e-58	3.24333e-57
GH84	Strep. sp002238115	1	101	100	100	5.66036e-58	3.24333e-57
GH84	Strep. sp013394695	1	101	100	100	5.66036e-58	3.24333e-57
GH84	Strep. sp029691405	1	101	100	100	5.66036e-58	3.24333e-57
GH84	Strep. sp901875575	1	101	100	100	5.66036e-58	3.24333e-57
GH84	Strep.BHI_1	1	101	100	100	5.66036e-58	3.24333e-57
GH84	Strep.BHI_10	1	101	100	100	5.66036e-58	3.24333e-57
GH84	Strep.BHI_11	1	101	100	100	5.66036e-58	3.24333e-57
GH84	Strep.BHI_2	1	101	100	100	5.66036e-58	3.24333e-57
GH84	Strep.BHI_3	1	101	100	100	5.66036e-58	3.24333e-57
GH84	Strep.BHI_4	1	101	100	100	5.66036e-58	3.24333e-57
GH84	Strep.BHI_5	1	101	100	100	5.66036e-58	3.24333e-57
GH84	Strep.BHI_6	1	101	100	100	5.66036e-58	3.24333e-57
GH84	Strep.BHI_7	1	101	100	100	5.66036e-58	3.24333e-57
GH84	Strep.BHI_9	1	101	100	100	5.66036e-58	3.24333e-57
GT2	Strep. caecimuris	1	101	100	100	5.66036e-58	3.24333e-57
GT2	Strep. cristatus	1	101	100	100	5.66036e-58	3.24333e-57
GT2	Strep. massiliensis	1	101	100	100	5.66036e-58	3.24333e-57
GT2	Strep. mutans	1	101	100	100	5.66036e-58	3.24333e-57
GT2	Strep. pseudopneumoniae	1	101	100	100	5.66036e-58	3.24333e-57
GT2	Strep. rubneri	1	101	100	100	5.66036e-58	3.24333e-57
GT2	Strep. sinensis	1	101	100	100	5.66036e-58	3.24333e-57
GT2	Strep. sp001556435	1	101	100	100	5.66036e-58	3.24333e-57
GT2	Strep. sp001813105	1	101	100	100	5.66036e-58	3.24333e-57
GT2	Strep. sp002238115	1	101	100	100	5.66036e-58	3.24333e-57
GT2	Strep. sp013394695	1	101	100	100	5.66036e-58	3.24333e-57
GT2	Strep. sp029691405	1	101	100	100	5.66036e-58	3.24333e-57
GT2	Strep. sp901875575	1	101	100	100	5.66036e-58	3.24333e-57
GT2	Strep.BHI_1	1	101	100	100	5.66036e-58	3.24333e-57
GT2	Strep.BHI_10	1	101	100	100	5.66036e-58	3.24333e-57
GT2	Strep.BHI_11	1	101	100	100	5.66036e-58	3.24333e-57
GT2	Strep.BHI_2	1	101	100	100	5.66036e-58	3.24333e-57
GT2	Strep.BHI_3	1	101	100	100	5.66036e-58	3.24333e-57
GT2	Strep.BHI_4	1	101	100	100	5.66036e-58	3.24333e-57
GT2	Strep.BHI_5	1	101	100	100	5.66036e-58	3.24333e-57
GT2	Strep.BHI_6	1	101	100	100	5.66036e-58	3.24333e-57
GT2	Strep.BHI_7	1	101	100	100	5.66036e-58	3.24333e-57
GT2	Strep.BHI_9	1	101	100	100	5.66036e-58	3.24333e-57
GT28	Strep. caecimuris	1	101	100	100	5.66036e-58	3.24333e-57
GT28	Strep. cristatus	1	101	100	100	5.66036e-58	3.24333e-57
GT28	Strep. massiliensis	1	101	100	100	5.66036e-58	3.24333e-57
GT28	Strep. mutans	1	101	100	100	5.66036e-58	3.24333e-57
GT28	Strep. pseudopneumoniae	1	101	100	100	5.66036e-58	3.24333e-57
GT28	Strep. rubneri	1	101	100	100	5.66036e-58	3.24333e-57
GT28	Strep. sinensis	1	101	100	100	5.66036e-58	3.24333e-57
GT28	Strep. sp001556435	1	101	100	100	5.66036e-58	3.24333e-57
GT28	Strep. sp001813105	1	101	100	100	5.66036e-58	3.24333e-57
GT28	Strep. sp002238115	1	101	100	100	5.66036e-58	3.24333e-57
GT28	Strep. sp013394695	1	101	100	100	5.66036e-58	3.24333e-57
GT28	Strep. sp029691405	1	101	100	100	5.66036e-58	3.24333e-57
GT28	Strep. sp901875575	1	101	100	100	5.66036e-58	3.24333e-57
GT28	Strep.BHI_1	1	101	100	100	5.66036e-58	3.24333e-57
GT28	Strep.BHI_10	1	101	100	100	5.66036e-58	3.24333e-57
GT28	Strep.BHI_11	1	101	100	100	5.66036e-58	3.24333e-57
GT28	Strep.BHI_2	1	101	100	100	5.66036e-58	3.24333e-57
GT28	Strep.BHI_3	1	101	100	100	5.66036e-58	3.24333e-57
GT28	Strep.BHI_4	1	101	100	100	5.66036e-58	3.24333e-57
GT28	Strep.BHI_5	1	101	100	100	5.66036e-58	3.24333e-57
GT28	Strep.BHI_6	1	101	100	100	5.66036e-58	3.24333e-57
GT28	Strep.BHI_7	1	101	100	100	5.66036e-58	3.24333e-57
GT28	Strep.BHI_9	1	101	100	100	5.66036e-58	3.24333e-57
GT35	Strep. caecimuris	1	101	100	100	5.66036e-58	3.24333e-57
GT35	Strep. cristatus	1	101	100	100	5.66036e-58	3.24333e-57
GT35	Strep. massiliensis	1	101	100	100	5.66036e-58	3.24333e-57
GT35	Strep. mutans	1	101	100	100	5.66036e-58	3.24333e-57
GT35	Strep. pseudopneumoniae	1	101	100	100	5.66036e-58	3.24333e-57
GT35	Strep. rubneri	1	101	100	100	5.66036e-58	3.24333e-57
GT35	Strep. sinensis	1	101	100	100	5.66036e-58	3.24333e-57
GT35	Strep. sp001556435	1	101	100	100	5.66036e-58	3.24333e-57
GT35	Strep. sp001813105	1	101	100	100	5.66036e-58	3.24333e-57
GT35	Strep. sp002238115	1	101	100	100	5.66036e-58	3.24333e-57
GT35	Strep. sp013394695	1	101	100	100	5.66036e-58	3.24333e-57
GT35	Strep. sp029691405	1	101	100	100	5.66036e-58	3.24333e-57
GT35	Strep. sp901875575	1	101	100	100	5.66036e-58	3.24333e-57
GT35	Strep.BHI_1	1	101	100	100	5.66036e-58	3.24333e-57
GT35	Strep.BHI_10	1	101	100	100	5.66036e-58	3.24333e-57
GT35	Strep.BHI_11	1	101	100	100	5.66036e-58	3.24333e-57
GT35	Strep.BHI_2	1	101	100	100	5.66036e-58	3.24333e-57
GT35	Strep.BHI_3	1	101	100	100	5.66036e-58	3.24333e-57
GT35	Strep.BHI_4	1	101	100	100	5.66036e-58	3.24333e-57
GT35	Strep.BHI_5	1	101	100	100	5.66036e-58	3.24333e-57
GT35	Strep.BHI_6	1	101	100	100	5.66036e-58	3.24333e-57
GT35	Strep.BHI_7	1	101	100	100	5.66036e-58	3.24333e-57
GT35	Strep.BHI_9	1	101	100	100	5.66036e-58	3.24333e-57
GT4	Strep. caecimuris	1	101	100	100	5.66036e-58	3.24333e-57
GT4	Strep. cristatus	1	101	100	100	5.66036e-58	3.24333e-57
GT4	Strep. massiliensis	1	101	100	100	5.66036e-58	3.24333e-57
GT4	Strep. mutans	1	101	100	100	5.66036e-58	3.24333e-57
GT4	Strep. pseudopneumoniae	1	101	100	100	5.66036e-58	3.24333e-57
GT4	Strep. rubneri	1	101	100	100	5.66036e-58	3.24333e-57
GT4	Strep. sinensis	1	101	100	100	5.66036e-58	3.24333e-57
GT4	Strep. sp001556435	1	101	100	100	5.66036e-58	3.24333e-57
GT4	Strep. sp001813105	1	101	100	100	5.66036e-58	3.24333e-57
GT4	Strep. sp002238115	1	101	100	100	5.66036e-58	3.24333e-57
GT4	Strep. sp013394695	1	101	100	100	5.66036e-58	3.24333e-57
GT4	Strep. sp029691405	1	101	100	100	5.66036e-58	3.24333e-57
GT4	Strep. sp901875575	1	101	100	100	5.66036e-58	3.24333e-57
GT4	Strep.BHI_1	1	101	100	100	5.66036e-58	3.24333e-57
GT4	Strep.BHI_10	1	101	100	100	5.66036e-58	3.24333e-57
GT4	Strep.BHI_11	1	101	100	100	5.66036e-58	3.24333e-57
GT4	Strep.BHI_2	1	101	100	100	5.66036e-58	3.24333e-57
GT4	Strep.BHI_3	1	101	100	100	5.66036e-58	3.24333e-57
GT4	Strep.BHI_4	1	101	100	100	5.66036e-58	3.24333e-57
GT4	Strep.BHI_5	1	101	100	100	5.66036e-58	3.24333e-57
GT4	Strep.BHI_6	1	101	100	100	5.66036e-58	3.24333e-57
GT4	Strep.BHI_7	1	101	100	100	5.66036e-58	3.24333e-57
GT4	Strep.BHI_9	1	101	100	100	5.66036e-58	3.24333e-57
GT5	Strep. caecimuris	1	101	100	100	5.66036e-58	3.24333e-57
GT5	Strep. cristatus	1	101	100	100	5.66036e-58	3.24333e-57
GT5	Strep. massiliensis	1	101	100	100	5.66036e-58	3.24333e-57
GT5	Strep. mutans	1	101	100	100	5.66036e-58	3.24333e-57
GT5	Strep. pseudopneumoniae	1	101	100	100	5.66036e-58	3.24333e-57
GT5	Strep. rubneri	1	101	100	100	5.66036e-58	3.24333e-57
GT5	Strep. sinensis	1	101	100	100	5.66036e-58	3.24333e-57
GT5	Strep. sp001556435	1	101	100	100	5.66036e-58	3.24333e-57
GT5	Strep. sp001813105	1	101	100	100	5.66036e-58	3.24333e-57
GT5	Strep. sp002238115	1	101	100	100	5.66036e-58	3.24333e-57
GT5	Strep. sp013394695	1	101	100	100	5.66036e-58	3.24333e-57
GT5	Strep. sp029691405	1	101	100	100	5.66036e-58	3.24333e-57
GT5	Strep. sp901875575	1	101	100	100	5.66036e-58	3.24333e-57
GT5	Strep.BHI_1	1	101	100	100	5.66036e-58	3.24333e-57
GT5	Strep.BHI_10	1	101	100	100	5.66036e-58	3.24333e-57
GT5	Strep.BHI_11	1	101	100	100	5.66036e-58	3.24333e-57
GT5	Strep.BHI_2	1	101	100	100	5.66036e-58	3.24333e-57
GT5	Strep.BHI_3	1	101	100	100	5.66036e-58	3.24333e-57
GT5	Strep.BHI_4	1	101	100	100	5.66036e-58	3.24333e-57
GT5	Strep.BHI_5	1	101	100	100	5.66036e-58	3.24333e-57
GT5	Strep.BHI_6	1	101	100	100	5.66036e-58	3.24333e-57
GT5	Strep.BHI_7	1	101	100	100	5.66036e-58	3.24333e-57
GT5	Strep.BHI_9	1	101	100	100	5.66036e-58	3.24333e-57
GT51	Strep. caecimuris	1	101	100	100	5.66036e-58	3.24333e-57
GT51	Strep. cristatus	1	101	100	100	5.66036e-58	3.24333e-57
GT51	Strep. massiliensis	1	101	100	100	5.66036e-58	3.24333e-57
GT51	Strep. mutans	1	101	100	100	5.66036e-58	3.24333e-57
GT51	Strep. pseudopneumoniae	1	101	100	100	5.66036e-58	3.24333e-57
GT51	Strep. rubneri	1	101	100	100	5.66036e-58	3.24333e-57
GT51	Strep. sinensis	1	101	100	100	5.66036e-58	3.24333e-57
GT51	Strep. sp001556435	1	101	100	100	5.66036e-58	3.24333e-57
GT51	Strep. sp001813105	1	101	100	100	5.66036e-58	3.24333e-57
GT51	Strep. sp002238115	1	101	100	100	5.66036e-58	3.24333e-57
GT51	Strep. sp013394695	1	101	100	100	5.66036e-58	3.24333e-57
GT51	Strep. sp029691405	1	101	100	100	5.66036e-58	3.24333e-57
GT51	Strep. sp901875575	1	101	100	100	5.66036e-58	3.24333e-57
GT51	Strep.BHI_1	1	101	100	100	5.66036e-58	3.24333e-57
GT51	Strep.BHI_10	1	101	100	100	5.66036e-58	3.24333e-57
GT51	Strep.BHI_11	1	101	100	100	5.66036e-58	3.24333e-57
GT51	Strep.BHI_2	1	101	100	100	5.66036e-58	3.24333e-57
GT51	Strep.BHI_3	1	101	100	100	5.66036e-58	3.24333e-57
GT51	Strep.BHI_4	1	101	100	100	5.66036e-58	3.24333e-57
GT51	Strep.BHI_5	1	101	100	100	5.66036e-58	3.24333e-57
GT51	Strep.BHI_6	1	101	100	100	5.66036e-58	3.24333e-57
GT51	Strep.BHI_7	1	101	100	100	5.66036e-58	3.24333e-57
GT51	Strep.BHI_9	1	101	100	100	5.66036e-58	3.24333e-57
GT58	Strep. caecimuris	1	101	100	100	5.66036e-58	3.24333e-57
GT58	Strep. cristatus	1	101	100	100	5.66036e-58	3.24333e-57
GT58	Strep. massiliensis	1	101	100	100	5.66036e-58	3.24333e-57
GT58	Strep. mutans	1	101	100	100	5.66036e-58	3.24333e-57
GT58	Strep. pseudopneumoniae	1	101	100	100	5.66036e-58	3.24333e-57
GT58	Strep. rubneri	1	101	100	100	5.66036e-58	3.24333e-57
GT58	Strep. sinensis	1	101	100	100	5.66036e-58	3.24333e-57
GT58	Strep. sp001556435	1	101	100	100	5.66036e-58	3.24333e-57
GT58	Strep. sp001813105	1	101	100	100	5.66036e-58	3.24333e-57
GT58	Strep. sp002238115	1	101	100	100	5.66036e-58	3.24333e-57
GT58	Strep. sp013394695	1	101	100	100	5.66036e-58	3.24333e-57
GT58	Strep. sp029691405	1	101	100	100	5.66036e-58	3.24333e-57
GT58	Strep. sp901875575	1	101	100	100	5.66036e-58	3.24333e-57
GT58	Strep.BHI_1	1	101	100	100	5.66036e-58	3.24333e-57
GT58	Strep.BHI_10	1	101	100	100	5.66036e-58	3.24333e-57
GT58	Strep.BHI_11	1	101	100	100	5.66036e-58	3.24333e-57
GT58	Strep.BHI_2	1	101	100	100	5.66036e-58	3.24333e-57
GT58	Strep.BHI_3	1	101	100	100	5.66036e-58	3.24333e-57
GT58	Strep.BHI_4	1	101	100	100	5.66036e-58	3.24333e-57
GT58	Strep.BHI_5	1	101	100	100	5.66036e-58	3.24333e-57
GT58	Strep.BHI_6	1	101	100	100	5.66036e-58	3.24333e-57
GT58	Strep.BHI_7	1	101	100	100	5.66036e-58	3.24333e-57
GT58	Strep.BHI_9	1	101	100	100	5.66036e-58	3.24333e-57
GT83	Strep. caecimuris	1	101	100	100	5.66036e-58	3.24333e-57
GT83	Strep. cristatus	1	101	100	100	5.66036e-58	3.24333e-57
GT83	Strep. massiliensis	1	101	100	100	5.66036e-58	3.24333e-57
GT83	Strep. mutans	1	101	100	100	5.66036e-58	3.24333e-57
GT83	Strep. pseudopneumoniae	1	101	100	100	5.66036e-58	3.24333e-57
GT83	Strep. rubneri	1	101	100	100	5.66036e-58	3.24333e-57
GT83	Strep. sinensis	1	101	100	100	5.66036e-58	3.24333e-57
GT83	Strep. sp001556435	1	101	100	100	5.66036e-58	3.24333e-57
GT83	Strep. sp001813105	1	101	100	100	5.66036e-58	3.24333e-57
GT83	Strep. sp002238115	1	101	100	100	5.66036e-58	3.24333e-57
GT83	Strep. sp013394695	1	101	100	100	5.66036e-58	3.24333e-57
GT83	Strep. sp029691405	1	101	100	100	5.66036e-58	3.24333e-57
GT83	Strep. sp901875575	1	101	100	100	5.66036e-58	3.24333e-57
GT83	Strep.BHI_1	1	101	100	100	5.66036e-58	3.24333e-57
GT83	Strep.BHI_10	1	101	100	100	5.66036e-58	3.24333e-57
GT83	Strep.BHI_11	1	101	100	100	5.66036e-58	3.24333e-57
GT83	Strep.BHI_2	1	101	100	100	5.66036e-58	3.24333e-57
GT83	Strep.BHI_3	1	101	100	100	5.66036e-58	3.24333e-57
GT83	Strep.BHI_4	1	101	100	100	5.66036e-58	3.24333e-57
GT83	Strep.BHI_5	1	101	100	100	5.66036e-58	3.24333e-57
GT83	Strep.BHI_6	1	101	100	100	5.66036e-58	3.24333e-57
GT83	Strep.BHI_7	1	101	100	100	5.66036e-58	3.24333e-57
GT83	Strep.BHI_9	1	101	100	100	5.66036e-58	3.24333e-57
GH73	Strep. sp901875575	0	97	97	97	1.3923e-57	7.95215e-57
GH73	Strep.BHI_2	0	97	97	97	1.3923e-57	7.95215e-57
CBM41	Strep. caecimuris	1	100	99	99	2.23085e-57	1.18845e-56
CBM41	Strep. cristatus	1	100	99	99	2.23085e-57	1.18845e-56
CBM41	Strep. mutans	1	100	99	99	2.23085e-57	1.18845e-56
CBM41	Strep. pseudopneumoniae	1	100	99	99	2.23085e-57	1.18845e-56
CBM41	Strep. rubneri	1	100	99	99	2.23085e-57	1.18845e-56
CBM41	Strep. sinensis	1	100	99	99	2.23085e-57	1.18845e-56
CBM41	Strep. sp001556435	1	100	99	99	2.23085e-57	1.18845e-56
CBM41	Strep. sp001813105	1	100	99	99	2.23085e-57	1.18845e-56
CBM41	Strep. sp002238115	1	100	99	99	2.23085e-57	1.18845e-56
CBM41	Strep. sp013394695	1	100	99	99	2.23085e-57	1.18845e-56
CBM41	Strep. sp029691405	1	100	99	99	2.23085e-57	1.18845e-56
CBM41	Strep. sp901875575	1	100	99	99	2.23085e-57	1.18845e-56
CBM41	Strep.BHI_1	1	100	99	99	2.23085e-57	1.18845e-56
CBM41	Strep.BHI_10	1	100	99	99	2.23085e-57	1.18845e-56
CBM41	Strep.BHI_11	1	100	99	99	2.23085e-57	1.18845e-56
CBM41	Strep.BHI_2	1	100	99	99	2.23085e-57	1.18845e-56
CBM41	Strep.BHI_3	1	100	99	99	2.23085e-57	1.18845e-56
CBM41	Strep.BHI_4	1	100	99	99	2.23085e-57	1.18845e-56
CBM41	Strep.BHI_5	1	100	99	99	2.23085e-57	1.18845e-56
CBM41	Strep.BHI_6	1	100	99	99	2.23085e-57	1.18845e-56
CBM41	Strep.BHI_7	1	100	99	99	2.23085e-57	1.18845e-56
CBM41	Strep.BHI_9	1	100	99	99	2.23085e-57	1.18845e-56
GT47	Strep. caecimuris	1	100	99	99	2.23085e-57	1.18845e-56
GT47	Strep. cristatus	1	100	99	99	2.23085e-57	1.18845e-56
GT47	Strep. massiliensis	1	100	99	99	2.23085e-57	1.18845e-56
GT47	Strep. mutans	1	100	99	99	2.23085e-57	1.18845e-56
GT47	Strep. pseudopneumoniae	1	100	99	99	2.23085e-57	1.18845e-56
GT47	Strep. rubneri	1	100	99	99	2.23085e-57	1.18845e-56
GT47	Strep. sinensis	1	100	99	99	2.23085e-57	1.18845e-56
GT47	Strep. sp001556435	1	100	99	99	2.23085e-57	1.18845e-56
GT47	Strep. sp001813105	1	100	99	99	2.23085e-57	1.18845e-56
GT47	Strep. sp002238115	1	100	99	99	2.23085e-57	1.18845e-56
GT47	Strep. sp013394695	1	100	99	99	2.23085e-57	1.18845e-56
GT47	Strep. sp029691405	1	100	99	99	2.23085e-57	1.18845e-56
GT47	Strep. sp901875575	1	100	99	99	2.23085e-57	1.18845e-56
GT47	Strep.BHI_1	1	100	99	99	2.23085e-57	1.18845e-56
GT47	Strep.BHI_10	1	100	99	99	2.23085e-57	1.18845e-56
GT47	Strep.BHI_11	1	100	99	99	2.23085e-57	1.18845e-56
GT47	Strep.BHI_2	1	100	99	99	2.23085e-57	1.18845e-56
GT47	Strep.BHI_3	1	100	99	99	2.23085e-57	1.18845e-56
GT47	Strep.BHI_4	1	100	99	99	2.23085e-57	1.18845e-56
GT47	Strep.BHI_5	1	100	99	99	2.23085e-57	1.18845e-56
GT47	Strep.BHI_6	1	100	99	99	2.23085e-57	1.18845e-56
GT47	Strep.BHI_7	1	100	99	99	2.23085e-57	1.18845e-56
GT47	Strep.BHI_9	1	100	99	99	2.23085e-57	1.18845e-56
GH13_23	Strep. caecimuris	1	99	98	98	8.79087e-57	4.2396e-56
GH13_23	Strep. cristatus	1	99	98	98	8.79087e-57	4.2396e-56
GH13_23	Strep. massiliensis	1	99	98	98	8.79087e-57	4.2396e-56
GH13_23	Strep. mutans	1	99	98	98	8.79087e-57	4.2396e-56
GH13_23	Strep. pseudopneumoniae	1	99	98	98	8.79087e-57	4.2396e-56
GH13_23	Strep. rubneri	1	99	98	98	8.79087e-57	4.2396e-56
GH13_23	Strep. sinensis	1	99	98	98	8.79087e-57	4.2396e-56
GH13_23	Strep. sp001556435	1	99	98	98	8.79087e-57	4.2396e-56
GH13_23	Strep. sp001813105	1	99	98	98	8.79087e-57	4.2396e-56
GH13_23	Strep. sp002238115	1	99	98	98	8.79087e-57	4.2396e-56
GH13_23	Strep. sp013394695	1	99	98	98	8.79087e-57	4.2396e-56
GH13_23	Strep. sp029691405	1	99	98	98	8.79087e-57	4.2396e-56
GH13_23	Strep. sp901875575	1	99	98	98	8.79087e-57	4.2396e-56
GH13_23	Strep. xiaochunlingii	1	99	98	98	8.79087e-57	4.2396e-56
GH13_23	Strep.BHI_1	1	99	98	98	8.79087e-57	4.2396e-56
GH13_23	Strep.BHI_10	1	99	98	98	8.79087e-57	4.2396e-56
GH13_23	Strep.BHI_11	1	99	98	98	8.79087e-57	4.2396e-56
GH13_23	Strep.BHI_2	1	99	98	98	8.79087e-57	4.2396e-56
GH13_23	Strep.BHI_3	1	99	98	98	8.79087e-57	4.2396e-56
GH13_23	Strep.BHI_4	1	99	98	98	8.79087e-57	4.2396e-56
GH13_23	Strep.BHI_5	1	99	98	98	8.79087e-57	4.2396e-56
GH13_23	Strep.BHI_6	1	99	98	98	8.79087e-57	4.2396e-56
GH13_23	Strep.BHI_7	1	99	98	98	8.79087e-57	4.2396e-56
GH13_23	Strep.BHI_9	1	99	98	98	8.79087e-57	4.2396e-56
GH130_1	Strep. caecimuris	1	99	98	98	8.79087e-57	4.2396e-56
GH130_1	Strep. cristatus	1	99	98	98	8.79087e-57	4.2396e-56
GH130_1	Strep. massiliensis	1	99	98	98	8.79087e-57	4.2396e-56
GH130_1	Strep. mutans	1	99	98	98	8.79087e-57	4.2396e-56
GH130_1	Strep. pseudopneumoniae	1	99	98	98	8.79087e-57	4.2396e-56
GH130_1	Strep. rubneri	1	99	98	98	8.79087e-57	4.2396e-56
GH130_1	Strep. sinensis	1	99	98	98	8.79087e-57	4.2396e-56
GH130_1	Strep. sp001556435	1	99	98	98	8.79087e-57	4.2396e-56
GH130_1	Strep. sp001813105	1	99	98	98	8.79087e-57	4.2396e-56
GH130_1	Strep. sp002238115	1	99	98	98	8.79087e-57	4.2396e-56
GH130_1	Strep. sp013394695	1	99	98	98	8.79087e-57	4.2396e-56
GH130_1	Strep. sp029691405	1	99	98	98	8.79087e-57	4.2396e-56
GH130_1	Strep. sp901875575	1	99	98	98	8.79087e-57	4.2396e-56
GH130_1	Strep.BHI_1	1	99	98	98	8.79087e-57	4.2396e-56
GH130_1	Strep.BHI_10	1	99	98	98	8.79087e-57	4.2396e-56
GH130_1	Strep.BHI_11	1	99	98	98	8.79087e-57	4.2396e-56
GH130_1	Strep.BHI_2	1	99	98	98	8.79087e-57	4.2396e-56
GH130_1	Strep.BHI_3	1	99	98	98	8.79087e-57	4.2396e-56
GH130_1	Strep.BHI_4	1	99	98	98	8.79087e-57	4.2396e-56
GH130_1	Strep.BHI_5	1	99	98	98	8.79087e-57	4.2396e-56
GH130_1	Strep.BHI_6	1	99	98	98	8.79087e-57	4.2396e-56
GH130_1	Strep.BHI_7	1	99	98	98	8.79087e-57	4.2396e-56
GH130_1	Strep.BHI_9	1	99	98	98	8.79087e-57	4.2396e-56
GH3	Strep. caecimuris	1	99	98	98	8.79087e-57	4.2396e-56
GH3	Strep. cristatus	1	99	98	98	8.79087e-57	4.2396e-56
GH3	Strep. massiliensis	1	99	98	98	8.79087e-57	4.2396e-56
GH3	Strep. mutans	1	99	98	98	8.79087e-57	4.2396e-56
GH3	Strep. pseudopneumoniae	1	99	98	98	8.79087e-57	4.2396e-56
GH3	Strep. rubneri	1	99	98	98	8.79087e-57	4.2396e-56
GH3	Strep. sinensis	1	99	98	98	8.79087e-57	4.2396e-56
GH3	Strep. sp001556435	1	99	98	98	8.79087e-57	4.2396e-56
GH3	Strep. sp001813105	1	99	98	98	8.79087e-57	4.2396e-56
GH3	Strep. sp002238115	1	99	98	98	8.79087e-57	4.2396e-56
GH3	Strep. sp013394695	1	99	98	98	8.79087e-57	4.2396e-56
GH3	Strep. sp029691405	1	99	98	98	8.79087e-57	4.2396e-56
GH3	Strep. sp901875575	1	99	98	98	8.79087e-57	4.2396e-56
GH3	Strep.BHI_1	1	99	98	98	8.79087e-57	4.2396e-56
GH3	Strep.BHI_10	1	99	98	98	8.79087e-57	4.2396e-56
GH3	Strep.BHI_11	1	99	98	98	8.79087e-57	4.2396e-56
GH3	Strep.BHI_2	1	99	98	98	8.79087e-57	4.2396e-56
GH3	Strep.BHI_3	1	99	98	98	8.79087e-57	4.2396e-56
GH3	Strep.BHI_4	1	99	98	98	8.79087e-57	4.2396e-56
GH3	Strep.BHI_5	1	99	98	98	8.79087e-57	4.2396e-56
GH3	Strep.BHI_6	1	99	98	98	8.79087e-57	4.2396e-56
GH3	Strep.BHI_7	1	99	98	98	8.79087e-57	4.2396e-56
GH3	Strep.BHI_9	1	99	98	98	8.79087e-57	4.2396e-56
CBM48	Strep. sanguinis	2	101	99	99	5.63401e-56	2.44873e-55
CBM48	Strep. xiaochunlingii	2	101	99	99	5.63401e-56	2.44873e-55
CBM48	Strep.BHI_8	2	101	99	99	5.63401e-56	2.44873e-55
CBM50	Strep. sanguinis	2	101	99	99	5.63401e-56	2.44873e-55
CBM50	Strep. xiaochunlingii	2	101	99	99	5.63401e-56	2.44873e-55
CBM50	Strep.BHI_8	2	101	99	99	5.63401e-56	2.44873e-55
CE4	Strep. sanguinis	2	101	99	99	5.63401e-56	2.44873e-55
CE4	Strep. xiaochunlingii	2	101	99	99	5.63401e-56	2.44873e-55
CE4	Strep.BHI_8	2	101	99	99	5.63401e-56	2.44873e-55
CE9	Strep. sanguinis	2	101	99	99	5.63401e-56	2.44873e-55
CE9	Strep. xiaochunlingii	2	101	99	99	5.63401e-56	2.44873e-55
CE9	Strep.BHI_8	2	101	99	99	5.63401e-56	2.44873e-55
GH1	Strep. sanguinis	2	101	99	99	5.63401e-56	2.44873e-55
GH1	Strep. xiaochunlingii	2	101	99	99	5.63401e-56	2.44873e-55
GH1	Strep.BHI_8	2	101	99	99	5.63401e-56	2.44873e-55
GH13	Strep. sanguinis	2	101	99	99	5.63401e-56	2.44873e-55
GH13	Strep. xiaochunlingii	2	101	99	99	5.63401e-56	2.44873e-55
GH13	Strep.BHI_8	2	101	99	99	5.63401e-56	2.44873e-55
GH13_11	Strep. sanguinis	2	101	99	99	5.63401e-56	2.44873e-55
GH13_11	Strep. xiaochunlingii	2	101	99	99	5.63401e-56	2.44873e-55
GH13_11	Strep.BHI_8	2	101	99	99	5.63401e-56	2.44873e-55
GH13_14	Strep. sanguinis	2	101	99	99	5.63401e-56	2.44873e-55
GH13_14	Strep. xiaochunlingii	2	101	99	99	5.63401e-56	2.44873e-55
GH13_14	Strep.BHI_8	2	101	99	99	5.63401e-56	2.44873e-55
GH13_31	Strep. sanguinis	2	101	99	99	5.63401e-56	2.44873e-55
GH13_31	Strep. xiaochunlingii	2	101	99	99	5.63401e-56	2.44873e-55
GH13_31	Strep.BHI_8	2	101	99	99	5.63401e-56	2.44873e-55
GH13_5	Strep. sanguinis	2	101	99	99	5.63401e-56	2.44873e-55
GH13_5	Strep. xiaochunlingii	2	101	99	99	5.63401e-56	2.44873e-55
GH13_5	Strep.BHI_8	2	101	99	99	5.63401e-56	2.44873e-55
GH13_9	Strep. sanguinis	2	101	99	99	5.63401e-56	2.44873e-55
GH13_9	Strep. xiaochunlingii	2	101	99	99	5.63401e-56	2.44873e-55
GH13_9	Strep.BHI_8	2	101	99	99	5.63401e-56	2.44873e-55
GH23	Strep. sanguinis	2	101	99	99	5.63401e-56	2.44873e-55
GH23	Strep. xiaochunlingii	2	101	99	99	5.63401e-56	2.44873e-55
GH23	Strep.BHI_8	2	101	99	99	5.63401e-56	2.44873e-55
GH25	Strep. sanguinis	2	101	99	99	5.63401e-56	2.44873e-55
GH25	Strep. xiaochunlingii	2	101	99	99	5.63401e-56	2.44873e-55
GH25	Strep.BHI_8	2	101	99	99	5.63401e-56	2.44873e-55
GH28	Strep. sanguinis	2	101	99	99	5.63401e-56	2.44873e-55
GH28	Strep. xiaochunlingii	2	101	99	99	5.63401e-56	2.44873e-55
GH28	Strep.BHI_8	2	101	99	99	5.63401e-56	2.44873e-55
GH32	Strep. sanguinis	2	101	99	99	5.63401e-56	2.44873e-55
GH32	Strep. xiaochunlingii	2	101	99	99	5.63401e-56	2.44873e-55
GH32	Strep.BHI_8	2	101	99	99	5.63401e-56	2.44873e-55
GH38	Strep. sanguinis	2	101	99	99	5.63401e-56	2.44873e-55
GH38	Strep. xiaochunlingii	2	101	99	99	5.63401e-56	2.44873e-55
GH38	Strep.BHI_8	2	101	99	99	5.63401e-56	2.44873e-55
GH5_11	Strep. sanguinis	2	101	99	99	5.63401e-56	2.44873e-55
GH5_11	Strep. xiaochunlingii	2	101	99	99	5.63401e-56	2.44873e-55
GH5_11	Strep.BHI_8	2	101	99	99	5.63401e-56	2.44873e-55
GH77	Strep. sanguinis	2	101	99	99	5.63401e-56	2.44873e-55
GH77	Strep. xiaochunlingii	2	101	99	99	5.63401e-56	2.44873e-55
GH77	Strep.BHI_8	2	101	99	99	5.63401e-56	2.44873e-55
GH84	Strep. sanguinis	2	101	99	99	5.63401e-56	2.44873e-55
GH84	Strep. xiaochunlingii	2	101	99	99	5.63401e-56	2.44873e-55
GH84	Strep.BHI_8	2	101	99	99	5.63401e-56	2.44873e-55
GT2	Strep. sanguinis	2	101	99	99	5.63401e-56	2.44873e-55
GT2	Strep. xiaochunlingii	2	101	99	99	5.63401e-56	2.44873e-55
GT2	Strep.BHI_8	2	101	99	99	5.63401e-56	2.44873e-55
GT28	Strep. sanguinis	2	101	99	99	5.63401e-56	2.44873e-55
GT28	Strep. xiaochunlingii	2	101	99	99	5.63401e-56	2.44873e-55
GT28	Strep.BHI_8	2	101	99	99	5.63401e-56	2.44873e-55
GT35	Strep. sanguinis	2	101	99	99	5.63401e-56	2.44873e-55
GT35	Strep. xiaochunlingii	2	101	99	99	5.63401e-56	2.44873e-55
GT35	Strep.BHI_8	2	101	99	99	5.63401e-56	2.44873e-55
GT4	Strep. sanguinis	2	101	99	99	5.63401e-56	2.44873e-55
GT4	Strep. xiaochunlingii	2	101	99	99	5.63401e-56	2.44873e-55
GT4	Strep.BHI_8	2	101	99	99	5.63401e-56	2.44873e-55
GT5	Strep. sanguinis	2	101	99	99	5.63401e-56	2.44873e-55
GT5	Strep. xiaochunlingii	2	101	99	99	5.63401e-56	2.44873e-55
GT5	Strep.BHI_8	2	101	99	99	5.63401e-56	2.44873e-55
GT51	Strep. sanguinis	2	101	99	99	5.63401e-56	2.44873e-55
GT51	Strep. xiaochunlingii	2	101	99	99	5.63401e-56	2.44873e-55
GT51	Strep.BHI_8	2	101	99	99	5.63401e-56	2.44873e-55
GT58	Strep. sanguinis	2	101	99	99	5.63401e-56	2.44873e-55
GT58	Strep. xiaochunlingii	2	101	99	99	5.63401e-56	2.44873e-55
GT58	Strep.BHI_8	2	101	99	99	5.63401e-56	2.44873e-55
GT83	Strep. sanguinis	2	101	99	99	5.63401e-56	2.44873e-55
GT83	Strep. xiaochunlingii	2	101	99	99	5.63401e-56	2.44873e-55
GT83	Strep.BHI_8	2	101	99	99	5.63401e-56	2.44873e-55
GH73	Strep. caecimuris	1	97	96	96	1.36445e-55	5.77541e-55
GH73	Strep. cristatus	1	97	96	96	1.36445e-55	5.77541e-55
GH73	Strep. massiliensis	1	97	96	96	1.36445e-55	5.77541e-55
GH73	Strep. mutans	1	97	96	96	1.36445e-55	5.77541e-55
GH73	Strep. pseudopneumoniae	1	97	96	96	1.36445e-55	5.77541e-55
GH73	Strep. rubneri	1	97	96	96	1.36445e-55	5.77541e-55
GH73	Strep. sinensis	1	97	96	96	1.36445e-55	5.77541e-55
GH73	Strep. sp001556435	1	97	96	96	1.36445e-55	5.77541e-55
GH73	Strep. sp001813105	1	97	96	96	1.36445e-55	5.77541e-55
GH73	Strep. sp002238115	1	97	96	96	1.36445e-55	5.77541e-55
GH73	Strep. sp013394695	1	97	96	96	1.36445e-55	5.77541e-55
GH73	Strep. sp029691405	1	97	96	96	1.36445e-55	5.77541e-55
GH73	Strep.BHI_1	1	97	96	96	1.36445e-55	5.77541e-55
GH73	Strep.BHI_10	1	97	96	96	1.36445e-55	5.77541e-55
GH73	Strep.BHI_11	1	97	96	96	1.36445e-55	5.77541e-55
GH73	Strep.BHI_3	1	97	96	96	1.36445e-55	5.77541e-55
GH73	Strep.BHI_4	1	97	96	96	1.36445e-55	5.77541e-55
GH73	Strep.BHI_5	1	97	96	96	1.36445e-55	5.77541e-55
GH73	Strep.BHI_6	1	97	96	96	1.36445e-55	5.77541e-55
GH73	Strep.BHI_7	1	97	96	96	1.36445e-55	5.77541e-55
GH73	Strep.BHI_8	1	97	96	96	1.36445e-55	5.77541e-55
GH73	Strep.BHI_9	1	97	96	96	1.36445e-55	5.77541e-55
CBM41	Strep. sanguinis	2	100	98	98	2.19816e-55	9.2385e-55
CBM41	Strep. xiaochunlingii	2	100	98	98	2.19816e-55	9.2385e-55
CBM41	Strep.BHI_8	2	100	98	98	2.19816e-55	9.2385e-55
GT47	Strep. sanguinis	2	100	98	98	2.19816e-55	9.2385e-55
GT47	Strep. xiaochunlingii	2	100	98	98	2.19816e-55	9.2385e-55
GT47	Strep.BHI_8	2	100	98	98	2.19816e-55	9.2385e-55
GH92	Strep. massiliensis	0	93	93	93	3.49021e-55	1.45828e-54
GH92	Strep. sanguinis	0	93	93	93	3.49021e-55	1.45828e-54
GH92	Strep. sinensis	0	93	93	93	3.49021e-55	1.45828e-54
GH92	Strep. sp901875575	0	93	93	93	3.49021e-55	1.45828e-54
GH92	Strep.BHI_11	0	93	93	93	3.49021e-55	1.45828e-54
GH13_23	Strep. sanguinis	2	99	97	97	8.57418e-55	3.54917e-54
GH13_23	Strep.BHI_8	2	99	97	97	8.57418e-55	3.54917e-54
GH130_1	Strep. sanguinis	2	99	97	97	8.57418e-55	3.54917e-54
GH130_1	Strep. xiaochunlingii	2	99	97	97	8.57418e-55	3.54917e-54
GH130_1	Strep.BHI_8	2	99	97	97	8.57418e-55	3.54917e-54
GH3	Strep. sanguinis	2	99	97	97	8.57418e-55	3.54917e-54
GH3	Strep. xiaochunlingii	2	99	97	97	8.57418e-55	3.54917e-54
GH3	Strep.BHI_8	2	99	97	97	8.57418e-55	3.54917e-54
CBM48	Strep. vestibularis	3	101	98	98	3.97832e-54	1.59671e-53
CBM50	Strep. vestibularis	3	101	98	98	3.97832e-54	1.59671e-53
CE4	Strep. vestibularis	3	101	98	98	3.97832e-54	1.59671e-53
CE9	Strep. vestibularis	3	101	98	98	3.97832e-54	1.59671e-53
GH1	Strep. vestibularis	3	101	98	98	3.97832e-54	1.59671e-53
GH13	Strep. vestibularis	3	101	98	98	3.97832e-54	1.59671e-53
GH13_11	Strep. vestibularis	3	101	98	98	3.97832e-54	1.59671e-53
GH13_14	Strep. vestibularis	3	101	98	98	3.97832e-54	1.59671e-53
GH13_31	Strep. vestibularis	3	101	98	98	3.97832e-54	1.59671e-53
GH13_5	Strep. vestibularis	3	101	98	98	3.97832e-54	1.59671e-53
GH13_9	Strep. vestibularis	3	101	98	98	3.97832e-54	1.59671e-53
GH23	Strep. vestibularis	3	101	98	98	3.97832e-54	1.59671e-53
GH25	Strep. vestibularis	3	101	98	98	3.97832e-54	1.59671e-53
GH28	Strep. vestibularis	3	101	98	98	3.97832e-54	1.59671e-53
GH32	Strep. vestibularis	3	101	98	98	3.97832e-54	1.59671e-53
GH38	Strep. vestibularis	3	101	98	98	3.97832e-54	1.59671e-53
GH5_11	Strep. vestibularis	3	101	98	98	3.97832e-54	1.59671e-53
GH77	Strep. vestibularis	3	101	98	98	3.97832e-54	1.59671e-53
GH84	Strep. vestibularis	3	101	98	98	3.97832e-54	1.59671e-53
GT2	Strep. vestibularis	3	101	98	98	3.97832e-54	1.59671e-53
GT28	Strep. vestibularis	3	101	98	98	3.97832e-54	1.59671e-53
GT35	Strep. vestibularis	3	101	98	98	3.97832e-54	1.59671e-53
GT4	Strep. vestibularis	3	101	98	98	3.97832e-54	1.59671e-53
GT5	Strep. vestibularis	3	101	98	98	3.97832e-54	1.59671e-53
GT51	Strep. vestibularis	3	101	98	98	3.97832e-54	1.59671e-53
GT58	Strep. vestibularis	3	101	98	98	3.97832e-54	1.59671e-53
GT83	Strep. vestibularis	3	101	98	98	3.97832e-54	1.59671e-53
GH73	Strep. sanguinis	2	97	95	95	1.30354e-53	5.22001e-53
GH73	Strep. xiaochunlingii	2	97	95	95	1.30354e-53	5.22001e-53
CBM41	Strep. vestibularis	3	100	97	97	1.53751e-53	6.14316e-53
GT47	Strep. vestibularis	3	100	97	97	1.53751e-53	6.14316e-53
GH35	Strep. mutans	0	90	90	90	2.19751e-53	8.70213e-53
GH35	Strep. salivarius	0	90	90	90	2.19751e-53	8.70213e-53
GH35	Strep. sp001556435	0	90	90	90	2.19751e-53	8.70213e-53
GH35	Strep. vestibularis	0	90	90	90	2.19751e-53	8.70213e-53
GT30	Strep. mutans	0	90	90	90	2.19751e-53	8.70213e-53
GT30	Strep. salivarius	0	90	90	90	2.19751e-53	8.70213e-53
GT30	Strep. sp001556435	0	90	90	90	2.19751e-53	8.70213e-53
GT30	Strep. vestibularis	0	90	90	90	2.19751e-53	8.70213e-53
GH92	Strep. caecimuris	1	93	92	92	3.28079e-53	1.27233e-52
GH92	Strep. cristatus	1	93	92	92	3.28079e-53	1.27233e-52
GH92	Strep. mutans	1	93	92	92	3.28079e-53	1.27233e-52
GH92	Strep. pseudopneumoniae	1	93	92	92	3.28079e-53	1.27233e-52
GH92	Strep. rubneri	1	93	92	92	3.28079e-53	1.27233e-52
GH92	Strep. sp001556435	1	93	92	92	3.28079e-53	1.27233e-52
GH92	Strep. sp001813105	1	93	92	92	3.28079e-53	1.27233e-52
GH92	Strep. sp002238115	1	93	92	92	3.28079e-53	1.27233e-52
GH92	Strep. sp013394695	1	93	92	92	3.28079e-53	1.27233e-52
GH92	Strep. sp029691405	1	93	92	92	3.28079e-53	1.27233e-52
GH92	Strep.BHI_1	1	93	92	92	3.28079e-53	1.27233e-52
GH92	Strep.BHI_10	1	93	92	92	3.28079e-53	1.27233e-52
GH92	Strep.BHI_2	1	93	92	92	3.28079e-53	1.27233e-52
GH92	Strep.BHI_3	1	93	92	92	3.28079e-53	1.27233e-52
GH92	Strep.BHI_4	1	93	92	92	3.28079e-53	1.27233e-52
GH92	Strep.BHI_5	1	93	92	92	3.28079e-53	1.27233e-52
GH92	Strep.BHI_6	1	93	92	92	3.28079e-53	1.27233e-52
GH92	Strep.BHI_7	1	93	92	92	3.28079e-53	1.27233e-52
GH92	Strep.BHI_9	1	93	92	92	3.28079e-53	1.27233e-52
GH13_23	Strep. vestibularis	3	99	96	96	5.94004e-53	2.29613e-52
GH130_1	Strep. vestibularis	3	99	96	96	5.94004e-53	2.29613e-52
GH3	Strep. vestibularis	3	99	96	96	5.94004e-53	2.29613e-52
CBM48	Strep. constellatus	4	101	97	97	1.87273e-52	7.03308e-52
CBM50	Strep. constellatus	4	101	97	97	1.87273e-52	7.03308e-52
CE4	Strep. constellatus	4	101	97	97	1.87273e-52	7.03308e-52
CE9	Strep. constellatus	4	101	97	97	1.87273e-52	7.03308e-52
GH1	Strep. constellatus	4	101	97	97	1.87273e-52	7.03308e-52
GH13	Strep. constellatus	4	101	97	97	1.87273e-52	7.03308e-52
GH13_11	Strep. constellatus	4	101	97	97	1.87273e-52	7.03308e-52
GH13_14	Strep. constellatus	4	101	97	97	1.87273e-52	7.03308e-52
GH13_31	Strep. constellatus	4	101	97	97	1.87273e-52	7.03308e-52
GH13_5	Strep. constellatus	4	101	97	97	1.87273e-52	7.03308e-52
GH13_9	Strep. constellatus	4	101	97	97	1.87273e-52	7.03308e-52
GH23	Strep. constellatus	4	101	97	97	1.87273e-52	7.03308e-52
GH25	Strep. constellatus	4	101	97	97	1.87273e-52	7.03308e-52
GH28	Strep. constellatus	4	101	97	97	1.87273e-52	7.03308e-52
GH32	Strep. constellatus	4	101	97	97	1.87273e-52	7.03308e-52
GH38	Strep. constellatus	4	101	97	97	1.87273e-52	7.03308e-52
GH5_11	Strep. constellatus	4	101	97	97	1.87273e-52	7.03308e-52
GH77	Strep. constellatus	4	101	97	97	1.87273e-52	7.03308e-52
GH84	Strep. constellatus	4	101	97	97	1.87273e-52	7.03308e-52
GT2	Strep. constellatus	4	101	97	97	1.87273e-52	7.03308e-52
GT28	Strep. constellatus	4	101	97	97	1.87273e-52	7.03308e-52
GT35	Strep. constellatus	4	101	97	97	1.87273e-52	7.03308e-52
GT4	Strep. constellatus	4	101	97	97	1.87273e-52	7.03308e-52
GT5	Strep. constellatus	4	101	97	97	1.87273e-52	7.03308e-52
GT51	Strep. constellatus	4	101	97	97	1.87273e-52	7.03308e-52
GT58	Strep. constellatus	4	101	97	97	1.87273e-52	7.03308e-52
GT83	Strep. constellatus	4	101	97	97	1.87273e-52	7.03308e-52
CBM41	Strep. constellatus	4	100	96	96	7.16117e-52	2.68374e-51
GT47	Strep. constellatus	4	100	96	96	7.16117e-52	2.68374e-51
GH73	Strep. vestibularis	3	97	94	94	8.85672e-52	3.31569e-51
GH35	Strep. caecimuris	1	90	89	89	1.99973e-51	7.17006e-51
GH35	Strep. cristatus	1	90	89	89	1.99973e-51	7.17006e-51
GH35	Strep. massiliensis	1	90	89	89	1.99973e-51	7.17006e-51
GH35	Strep. pseudopneumoniae	1	90	89	89	1.99973e-51	7.17006e-51
GH35	Strep. rubneri	1	90	89	89	1.99973e-51	7.17006e-51
GH35	Strep. sinensis	1	90	89	89	1.99973e-51	7.17006e-51
GH35	Strep. sp001813105	1	90	89	89	1.99973e-51	7.17006e-51
GH35	Strep. sp002238115	1	90	89	89	1.99973e-51	7.17006e-51
GH35	Strep. sp013394695	1	90	89	89	1.99973e-51	7.17006e-51
GH35	Strep. sp029691405	1	90	89	89	1.99973e-51	7.17006e-51
GH35	Strep. sp901875575	1	90	89	89	1.99973e-51	7.17006e-51
GH35	Strep.BHI_1	1	90	89	89	1.99973e-51	7.17006e-51
GH35	Strep.BHI_10	1	90	89	89	1.99973e-51	7.17006e-51
GH35	Strep.BHI_11	1	90	89	89	1.99973e-51	7.17006e-51
GH35	Strep.BHI_2	1	90	89	89	1.99973e-51	7.17006e-51
GH35	Strep.BHI_3	1	90	89	89	1.99973e-51	7.17006e-51
GH35	Strep.BHI_4	1	90	89	89	1.99973e-51	7.17006e-51
GH35	Strep.BHI_5	1	90	89	89	1.99973e-51	7.17006e-51
GH35	Strep.BHI_6	1	90	89	89	1.99973e-51	7.17006e-51
GH35	Strep.BHI_7	1	90	89	89	1.99973e-51	7.17006e-51
GH35	Strep.BHI_9	1	90	89	89	1.99973e-51	7.17006e-51
GT30	Strep. caecimuris	1	90	89	89	1.99973e-51	7.17006e-51
GT30	Strep. cristatus	1	90	89	89	1.99973e-51	7.17006e-51
GT30	Strep. massiliensis	1	90	89	89	1.99973e-51	7.17006e-51
GT30	Strep. pseudopneumoniae	1	90	89	89	1.99973e-51	7.17006e-51
GT30	Strep. rubneri	1	90	89	89	1.99973e-51	7.17006e-51
GT30	Strep. sinensis	1	90	89	89	1.99973e-51	7.17006e-51
GT30	Strep. sp001813105	1	90	89	89	1.99973e-51	7.17006e-51
GT30	Strep. sp002238115	1	90	89	89	1.99973e-51	7.17006e-51
GT30	Strep. sp013394695	1	90	89	89	1.99973e-51	7.17006e-51
GT30	Strep. sp029691405	1	90	89	89	1.99973e-51	7.17006e-51
GT30	Strep. sp901875575	1	90	89	89	1.99973e-51	7.17006e-51
GT30	Strep.BHI_1	1	90	89	89	1.99973e-51	7.17006e-51
GT30	Strep.BHI_10	1	90	89	89	1.99973e-51	7.17006e-51
GT30	Strep.BHI_11	1	90	89	89	1.99973e-51	7.17006e-51
GT30	Strep.BHI_2	1	90	89	89	1.99973e-51	7.17006e-51
GT30	Strep.BHI_3	1	90	89	89	1.99973e-51	7.17006e-51
GT30	Strep.BHI_4	1	90	89	89	1.99973e-51	7.17006e-51
GT30	Strep.BHI_5	1	90	89	89	1.99973e-51	7.17006e-51
GT30	Strep.BHI_6	1	90	89	89	1.99973e-51	7.17006e-51
GT30	Strep.BHI_7	1	90	89	89	1.99973e-51	7.17006e-51
GT30	Strep.BHI_9	1	90	89	89	1.99973e-51	7.17006e-51
GH13_23	Strep. constellatus	4	99	95	95	2.73714e-51	9.78451e-51
GH130_1	Strep. constellatus	4	99	95	95	2.73714e-51	9.78451e-51
GH3	Strep. constellatus	4	99	95	95	2.73714e-51	9.78451e-51
GH92	Strep. xiaochunlingii	2	93	91	91	3.00315e-51	1.07139e-50
GH92	Strep.BHI_8	2	93	91	91	3.00315e-51	1.07139e-50
GH73	Strep. constellatus	4	97	93	93	3.99313e-50	1.42315e-49
GH3	Strep. hominis	5	99	94	94	1.37356e-49	4.89047e-49
GH35	Strep. sanguinis	2	90	88	88	1.77053e-49	6.26632e-49
GH35	Strep. xiaochunlingii	2	90	88	88	1.77053e-49	6.26632e-49
GH35	Strep.BHI_8	2	90	88	88	1.77053e-49	6.26632e-49
GT30	Strep. sanguinis	2	90	88	88	1.77053e-49	6.26632e-49
GT30	Strep. xiaochunlingii	2	90	88	88	1.77053e-49	6.26632e-49
GT30	Strep.BHI_8	2	90	88	88	1.77053e-49	6.26632e-49
GH92	Strep. vestibularis	3	93	90	90	1.96029e-49	6.93104e-49
CBM48	Strep. gordonii	6	101	95	95	2.47233e-49	8.09125e-49
CBM48	Strep. hominis	6	101	95	95	2.47233e-49	8.09125e-49
CBM48	Strep. salivarius	6	101	95	95	2.47233e-49	8.09125e-49
CBM50	Strep. gordonii	6	101	95	95	2.47233e-49	8.09125e-49
CBM50	Strep. hominis	6	101	95	95	2.47233e-49	8.09125e-49
CBM50	Strep. salivarius	6	101	95	95	2.47233e-49	8.09125e-49
CE4	Strep. gordonii	6	101	95	95	2.47233e-49	8.09125e-49
CE4	Strep. hominis	6	101	95	95	2.47233e-49	8.09125e-49
CE4	Strep. salivarius	6	101	95	95	2.47233e-49	8.09125e-49
CE9	Strep. gordonii	6	101	95	95	2.47233e-49	8.09125e-49
CE9	Strep. hominis	6	101	95	95	2.47233e-49	8.09125e-49
CE9	Strep. salivarius	6	101	95	95	2.47233e-49	8.09125e-49
GH1	Strep. gordonii	6	101	95	95	2.47233e-49	8.09125e-49
GH1	Strep. hominis	6	101	95	95	2.47233e-49	8.09125e-49
GH1	Strep. salivarius	6	101	95	95	2.47233e-49	8.09125e-49
GH13	Strep. gordonii	6	101	95	95	2.47233e-49	8.09125e-49
GH13	Strep. hominis	6	101	95	95	2.47233e-49	8.09125e-49
GH13	Strep. salivarius	6	101	95	95	2.47233e-49	8.09125e-49
GH13_11	Strep. gordonii	6	101	95	95	2.47233e-49	8.09125e-49
GH13_11	Strep. hominis	6	101	95	95	2.47233e-49	8.09125e-49
GH13_11	Strep. salivarius	6	101	95	95	2.47233e-49	8.09125e-49
GH13_14	Strep. gordonii	6	101	95	95	2.47233e-49	8.09125e-49
GH13_14	Strep. hominis	6	101	95	95	2.47233e-49	8.09125e-49
GH13_14	Strep. salivarius	6	101	95	95	2.47233e-49	8.09125e-49
GH13_31	Strep. gordonii	6	101	95	95	2.47233e-49	8.09125e-49
GH13_31	Strep. hominis	6	101	95	95	2.47233e-49	8.09125e-49
GH13_31	Strep. salivarius	6	101	95	95	2.47233e-49	8.09125e-49
GH13_5	Strep. gordonii	6	101	95	95	2.47233e-49	8.09125e-49
GH13_5	Strep. hominis	6	101	95	95	2.47233e-49	8.09125e-49
GH13_5	Strep. salivarius	6	101	95	95	2.47233e-49	8.09125e-49
GH13_9	Strep. gordonii	6	101	95	95	2.47233e-49	8.09125e-49
GH13_9	Strep. hominis	6	101	95	95	2.47233e-49	8.09125e-49
GH13_9	Strep. salivarius	6	101	95	95	2.47233e-49	8.09125e-49
GH23	Strep. gordonii	6	101	95	95	2.47233e-49	8.09125e-49
GH23	Strep. hominis	6	101	95	95	2.47233e-49	8.09125e-49
GH23	Strep. salivarius	6	101	95	95	2.47233e-49	8.09125e-49
GH25	Strep. gordonii	6	101	95	95	2.47233e-49	8.09125e-49
GH25	Strep. hominis	6	101	95	95	2.47233e-49	8.09125e-49
GH25	Strep. salivarius	6	101	95	95	2.47233e-49	8.09125e-49
GH28	Strep. gordonii	6	101	95	95	2.47233e-49	8.09125e-49
GH28	Strep. hominis	6	101	95	95	2.47233e-49	8.09125e-49
GH28	Strep. salivarius	6	101	95	95	2.47233e-49	8.09125e-49
GH32	Strep. gordonii	6	101	95	95	2.47233e-49	8.09125e-49
GH32	Strep. hominis	6	101	95	95	2.47233e-49	8.09125e-49
GH32	Strep. salivarius	6	101	95	95	2.47233e-49	8.09125e-49
GH38	Strep. gordonii	6	101	95	95	2.47233e-49	8.09125e-49
GH38	Strep. hominis	6	101	95	95	2.47233e-49	8.09125e-49
GH38	Strep. salivarius	6	101	95	95	2.47233e-49	8.09125e-49
GH5_11	Strep. gordonii	6	101	95	95	2.47233e-49	8.09125e-49
GH5_11	Strep. hominis	6	101	95	95	2.47233e-49	8.09125e-49
GH5_11	Strep. salivarius	6	101	95	95	2.47233e-49	8.09125e-49
GH77	Strep. gordonii	6	101	95	95	2.47233e-49	8.09125e-49
GH77	Strep. hominis	6	101	95	95	2.47233e-49	8.09125e-49
GH77	Strep. salivarius	6	101	95	95	2.47233e-49	8.09125e-49
GH84	Strep. gordonii	6	101	95	95	2.47233e-49	8.09125e-49
GH84	Strep. hominis	6	101	95	95	2.47233e-49	8.09125e-49
GH84	Strep. salivarius	6	101	95	95	2.47233e-49	8.09125e-49
GT2	Strep. gordonii	6	101	95	95	2.47233e-49	8.09125e-49
GT2	Strep. hominis	6	101	95	95	2.47233e-49	8.09125e-49
GT2	Strep. salivarius	6	101	95	95	2.47233e-49	8.09125e-49
GT28	Strep. gordonii	6	101	95	95	2.47233e-49	8.09125e-49
GT28	Strep. hominis	6	101	95	95	2.47233e-49	8.09125e-49
GT28	Strep. salivarius	6	101	95	95	2.47233e-49	8.09125e-49
GT35	Strep. gordonii	6	101	95	95	2.47233e-49	8.09125e-49
GT35	Strep. hominis	6	101	95	95	2.47233e-49	8.09125e-49
GT35	Strep. salivarius	6	101	95	95	2.47233e-49	8.09125e-49
GT4	Strep. gordonii	6	101	95	95	2.47233e-49	8.09125e-49
GT4	Strep. hominis	6	101	95	95	2.47233e-49	8.09125e-49
GT4	Strep. salivarius	6	101	95	95	2.47233e-49	8.09125e-49
GT5	Strep. gordonii	6	101	95	95	2.47233e-49	8.09125e-49
GT5	Strep. hominis	6	101	95	95	2.47233e-49	8.09125e-49
GT5	Strep. salivarius	6	101	95	95	2.47233e-49	8.09125e-49
GT51	Strep. gordonii	6	101	95	95	2.47233e-49	8.09125e-49
GT51	Strep. hominis	6	101	95	95	2.47233e-49	8.09125e-49
GT51	Strep. salivarius	6	101	95	95	2.47233e-49	8.09125e-49
GT58	Strep. gordonii	6	101	95	95	2.47233e-49	8.09125e-49
GT58	Strep. hominis	6	101	95	95	2.47233e-49	8.09125e-49
GT58	Strep. salivarius	6	101	95	95	2.47233e-49	8.09125e-49
GT83	Strep. gordonii	6	101	95	95	2.47233e-49	8.09125e-49
GT83	Strep. hominis	6	101	95	95	2.47233e-49	8.09125e-49
GT83	Strep. salivarius	6	101	95	95	2.47233e-49	8.09125e-49
GH0	Strep. anginosus	0	83	83	83	3.45795e-49	1.12858e-48
GH0	Strep. constellatus	0	83	83	83	3.45795e-49	1.12858e-48
GH0	Strep. hominis	0	83	83	83	3.45795e-49	1.12858e-48
CBM41	Strep. gordonii	6	100	94	94	9.26631e-49	3.00775e-48
CBM41	Strep. hominis	6	100	94	94	9.26631e-49	3.00775e-48
CBM41	Strep. salivarius	6	100	94	94	9.26631e-49	3.00775e-48
GT47	Strep. gordonii	6	100	94	94	9.26631e-49	3.00775e-48
GT47	Strep. hominis	6	100	94	94	9.26631e-49	3.00775e-48
GT47	Strep. salivarius	6	100	94	94	9.26631e-49	3.00775e-48
GT0	Strep. pseudopneumoniae	0	82	82	82	1.37485e-48	4.43034e-48
GT0	Strep. sp013394695	0	82	82	82	1.37485e-48	4.43034e-48
GT0	Strep. xiaochunlingii	0	82	82	82	1.37485e-48	4.43034e-48
GT0	Strep.BHI_11	0	82	82	82	1.37485e-48	4.43034e-48
GT0	Strep.BHI_3	0	82	82	82	1.37485e-48	4.43034e-48
GT0	Strep.BHI_6	0	82	82	82	1.37485e-48	4.43034e-48
GT0	Strep.BHI_7	0	82	82	82	1.37485e-48	4.43034e-48
GT0	Strep.BHI_8	0	82	82	82	1.37485e-48	4.43034e-48
GH13_23	Strep. gordonii	6	99	93	93	3.47075e-48	1.11039e-47
GH13_23	Strep. hominis	6	99	93	93	3.47075e-48	1.11039e-47
GH13_23	Strep. salivarius	6	99	93	93	3.47075e-48	1.11039e-47
GH130_1	Strep. gordonii	6	99	93	93	3.47075e-48	1.11039e-47
GH130_1	Strep. hominis	6	99	93	93	3.47075e-48	1.11039e-47
GH130_1	Strep. salivarius	6	99	93	93	3.47075e-48	1.11039e-47
GH3	Strep. gordonii	6	99	93	93	3.47075e-48	1.11039e-47
GH3	Strep. salivarius	6	99	93	93	3.47075e-48	1.11039e-47
CBM48	Strep. anginosus	7	101	94	94	6.81018e-48	2.12721e-47
CBM50	Strep. anginosus	7	101	94	94	6.81018e-48	2.12721e-47
CE4	Strep. anginosus	7	101	94	94	6.81018e-48	2.12721e-47
CE9	Strep. anginosus	7	101	94	94	6.81018e-48	2.12721e-47
GH1	Strep. anginosus	7	101	94	94	6.81018e-48	2.12721e-47
GH13	Strep. anginosus	7	101	94	94	6.81018e-48	2.12721e-47
GH13_11	Strep. anginosus	7	101	94	94	6.81018e-48	2.12721e-47
GH13_14	Strep. anginosus	7	101	94	94	6.81018e-48	2.12721e-47
GH13_31	Strep. anginosus	7	101	94	94	6.81018e-48	2.12721e-47
GH13_5	Strep. anginosus	7	101	94	94	6.81018e-48	2.12721e-47
GH13_9	Strep. anginosus	7	101	94	94	6.81018e-48	2.12721e-47
GH23	Strep. anginosus	7	101	94	94	6.81018e-48	2.12721e-47
GH25	Strep. anginosus	7	101	94	94	6.81018e-48	2.12721e-47
GH28	Strep. anginosus	7	101	94	94	6.81018e-48	2.12721e-47
GH32	Strep. anginosus	7	101	94	94	6.81018e-48	2.12721e-47
GH38	Strep. anginosus	7	101	94	94	6.81018e-48	2.12721e-47
GH5_11	Strep. anginosus	7	101	94	94	6.81018e-48	2.12721e-47
GH77	Strep. anginosus	7	101	94	94	6.81018e-48	2.12721e-47
GH84	Strep. anginosus	7	101	94	94	6.81018e-48	2.12721e-47
GT2	Strep. anginosus	7	101	94	94	6.81018e-48	2.12721e-47
GT28	Strep. anginosus	7	101	94	94	6.81018e-48	2.12721e-47
GT35	Strep. anginosus	7	101	94	94	6.81018e-48	2.12721e-47
GT4	Strep. anginosus	7	101	94	94	6.81018e-48	2.12721e-47
GT5	Strep. anginosus	7	101	94	94	6.81018e-48	2.12721e-47
GT51	Strep. anginosus	7	101	94	94	6.81018e-48	2.12721e-47
GT58	Strep. anginosus	7	101	94	94	6.81018e-48	2.12721e-47
GT83	Strep. anginosus	7	101	94	94	6.81018e-48	2.12721e-47
GH92	Strep. constellatus	4	93	89	89	8.44876e-48	2.63672e-47
CBM41	Strep. anginosus	7	100	93	93	2.52563e-47	7.8683e-47
GT47	Strep. anginosus	7	100	93	93	2.52563e-47	7.8683e-47
GH0	Strep. caecimuris	1	83	82	82	2.90468e-47	8.87084e-47
GH0	Strep. cristatus	1	83	82	82	2.90468e-47	8.87084e-47
GH0	Strep. massiliensis	1	83	82	82	2.90468e-47	8.87084e-47
GH0	Strep. mutans	1	83	82	82	2.90468e-47	8.87084e-47
GH0	Strep. pseudopneumoniae	1	83	82	82	2.90468e-47	8.87084e-47
GH0	Strep. rubneri	1	83	82	82	2.90468e-47	8.87084e-47
GH0	Strep. sinensis	1	83	82	82	2.90468e-47	8.87084e-47
GH0	Strep. sp001556435	1	83	82	82	2.90468e-47	8.87084e-47
GH0	Strep. sp001813105	1	83	82	82	2.90468e-47	8.87084e-47
GH0	Strep. sp002238115	1	83	82	82	2.90468e-47	8.87084e-47
GH0	Strep. sp013394695	1	83	82	82	2.90468e-47	8.87084e-47
GH0	Strep. sp029691405	1	83	82	82	2.90468e-47	8.87084e-47
GH0	Strep. sp901875575	1	83	82	82	2.90468e-47	8.87084e-47
GH0	Strep.BHI_1	1	83	82	82	2.90468e-47	8.87084e-47
GH0	Strep.BHI_10	1	83	82	82	2.90468e-47	8.87084e-47
GH0	Strep.BHI_11	1	83	82	82	2.90468e-47	8.87084e-47
GH0	Strep.BHI_2	1	83	82	82	2.90468e-47	8.87084e-47
GH0	Strep.BHI_3	1	83	82	82	2.90468e-47	8.87084e-47
GH0	Strep.BHI_4	1	83	82	82	2.90468e-47	8.87084e-47
GH0	Strep.BHI_5	1	83	82	82	2.90468e-47	8.87084e-47
GH0	Strep.BHI_6	1	83	82	82	2.90468e-47	8.87084e-47
GH0	Strep.BHI_7	1	83	82	82	2.90468e-47	8.87084e-47
GH0	Strep.BHI_9	1	83	82	82	2.90468e-47	8.87084e-47
GH73	Strep. gordonii	6	97	91	91	4.85939e-47	1.48024e-46
GH73	Strep. hominis	6	97	91	91	4.85939e-47	1.48024e-46
GH73	Strep. salivarius	6	97	91	91	4.85939e-47	1.48024e-46
GH2	Strep. constellatus	0	79	79	79	8.63707e-47	2.61534e-46
GH2	Strep. hominis	0	79	79	79	8.63707e-47	2.61534e-46
GH2	Strep. massiliensis	0	79	79	79	8.63707e-47	2.61534e-46
GH2	Strep. mutans	0	79	79	79	8.63707e-47	2.61534e-46
GH2	Strep. sanguinis	0	79	79	79	8.63707e-47	2.61534e-46
GH2	Strep. sp901875575	0	79	79	79	8.63707e-47	2.61534e-46
GH2	Strep.BHI_11	0	79	79	79	8.63707e-47	2.61534e-46
GH13_23	Strep. anginosus	7	99	92	92	9.35935e-47	2.82445e-46
GH130_1	Strep. anginosus	7	99	92	92	9.35935e-47	2.82445e-46
GH130_1	Strep. infantis	7	99	92	92	9.35935e-47	2.82445e-46
GH3	Strep. anginosus	7	99	92	92	9.35935e-47	2.82445e-46
GT0	Strep. caecimuris	1	82	81	81	1.14112e-46	3.3948e-46
GT0	Strep. cristatus	1	82	81	81	1.14112e-46	3.3948e-46
GT0	Strep. massiliensis	1	82	81	81	1.14112e-46	3.3948e-46
GT0	Strep. mutans	1	82	81	81	1.14112e-46	3.3948e-46
GT0	Strep. rubneri	1	82	81	81	1.14112e-46	3.3948e-46
GT0	Strep. sinensis	1	82	81	81	1.14112e-46	3.3948e-46
GT0	Strep. sp001556435	1	82	81	81	1.14112e-46	3.3948e-46
GT0	Strep. sp001813105	1	82	81	81	1.14112e-46	3.3948e-46
GT0	Strep. sp002238115	1	82	81	81	1.14112e-46	3.3948e-46
GT0	Strep. sp029691405	1	82	81	81	1.14112e-46	3.3948e-46
GT0	Strep. sp901875575	1	82	81	81	1.14112e-46	3.3948e-46
GT0	Strep.BHI_1	1	82	81	81	1.14112e-46	3.3948e-46
GT0	Strep.BHI_10	1	82	81	81	1.14112e-46	3.3948e-46
GT0	Strep.BHI_2	1	82	81	81	1.14112e-46	3.3948e-46
GT0	Strep.BHI_4	1	82	81	81	1.14112e-46	3.3948e-46
GT0	Strep.BHI_5	1	82	81	81	1.14112e-46	3.3948e-46
GT0	Strep.BHI_9	1	82	81	81	1.14112e-46	3.3948e-46
CBM48	Strep. infantis	8	101	93	93	1.83543e-46	5.22482e-46
CBM48	Strep. oralis	8	101	93	93	1.83543e-46	5.22482e-46
CBM50	Strep. infantis	8	101	93	93	1.83543e-46	5.22482e-46
CBM50	Strep. oralis	8	101	93	93	1.83543e-46	5.22482e-46
CE4	Strep. infantis	8	101	93	93	1.83543e-46	5.22482e-46
CE4	Strep. oralis	8	101	93	93	1.83543e-46	5.22482e-46
CE9	Strep. infantis	8	101	93	93	1.83543e-46	5.22482e-46
CE9	Strep. oralis	8	101	93	93	1.83543e-46	5.22482e-46
GH1	Strep. infantis	8	101	93	93	1.83543e-46	5.22482e-46
GH1	Strep. oralis	8	101	93	93	1.83543e-46	5.22482e-46
GH13	Strep. infantis	8	101	93	93	1.83543e-46	5.22482e-46
GH13	Strep. oralis	8	101	93	93	1.83543e-46	5.22482e-46
GH13_11	Strep. infantis	8	101	93	93	1.83543e-46	5.22482e-46
GH13_11	Strep. oralis	8	101	93	93	1.83543e-46	5.22482e-46
GH13_14	Strep. infantis	8	101	93	93	1.83543e-46	5.22482e-46
GH13_14	Strep. oralis	8	101	93	93	1.83543e-46	5.22482e-46
GH13_31	Strep. infantis	8	101	93	93	1.83543e-46	5.22482e-46
GH13_31	Strep. oralis	8	101	93	93	1.83543e-46	5.22482e-46
GH13_5	Strep. infantis	8	101	93	93	1.83543e-46	5.22482e-46
GH13_5	Strep. oralis	8	101	93	93	1.83543e-46	5.22482e-46
GH13_9	Strep. infantis	8	101	93	93	1.83543e-46	5.22482e-46
GH13_9	Strep. oralis	8	101	93	93	1.83543e-46	5.22482e-46
GH23	Strep. infantis	8	101	93	93	1.83543e-46	5.22482e-46
GH23	Strep. oralis	8	101	93	93	1.83543e-46	5.22482e-46
GH25	Strep. infantis	8	101	93	93	1.83543e-46	5.22482e-46
GH25	Strep. oralis	8	101	93	93	1.83543e-46	5.22482e-46
GH28	Strep. infantis	8	101	93	93	1.83543e-46	5.22482e-46
GH28	Strep. oralis	8	101	93	93	1.83543e-46	5.22482e-46
GH32	Strep. infantis	8	101	93	93	1.83543e-46	5.22482e-46
GH32	Strep. oralis	8	101	93	93	1.83543e-46	5.22482e-46
GH38	Strep. infantis	8	101	93	93	1.83543e-46	5.22482e-46
GH38	Strep. oralis	8	101	93	93	1.83543e-46	5.22482e-46
GH5_11	Strep. infantis	8	101	93	93	1.83543e-46	5.22482e-46
GH5_11	Strep. oralis	8	101	93	93	1.83543e-46	5.22482e-46
GH77	Strep. infantis	8	101	93	93	1.83543e-46	5.22482e-46
GH77	Strep. oralis	8	101	93	93	1.83543e-46	5.22482e-46
GH84	Strep. infantis	8	101	93	93	1.83543e-46	5.22482e-46
GH84	Strep. oralis	8	101	93	93	1.83543e-46	5.22482e-46
GT2	Strep. infantis	8	101	93	93	1.83543e-46	5.22482e-46
GT2	Strep. oralis	8	101	93	93	1.83543e-46	5.22482e-46
GT28	Strep. infantis	8	101	93	93	1.83543e-46	5.22482e-46
GT28	Strep. oralis	8	101	93	93	1.83543e-46	5.22482e-46
GT35	Strep. infantis	8	101	93	93	1.83543e-46	5.22482e-46
GT35	Strep. oralis	8	101	93	93	1.83543e-46	5.22482e-46
GT4	Strep. infantis	8	101	93	93	1.83543e-46	5.22482e-46
GT4	Strep. oralis	8	101	93	93	1.83543e-46	5.22482e-46
GT5	Strep. infantis	8	101	93	93	1.83543e-46	5.22482e-46
GT5	Strep. oralis	8	101	93	93	1.83543e-46	5.22482e-46
GT51	Strep. infantis	8	101	93	93	1.83543e-46	5.22482e-46
GT51	Strep. oralis	8	101	93	93	1.83543e-46	5.22482e-46
GT58	Strep. infantis	8	101	93	93	1.83543e-46	5.22482e-46
GT58	Strep. oralis	8	101	93	93	1.83543e-46	5.22482e-46
GT83	Strep. infantis	8	101	93	93	1.83543e-46	5.22482e-46
GT83	Strep. oralis	8	101	93	93	1.83543e-46	5.22482e-46
GH35	Strep. constellatus	4	90	86	86	4.66145e-46	1.32483e-45
GT30	Strep. constellatus	4	90	86	86	4.66145e-46	1.32483e-45
CBM41	Strep. infantis	8	100	92	92	6.74971e-46	1.91072e-45
CBM41	Strep. oralis	8	100	92	92	6.74971e-46	1.91072e-45
GT47	Strep. infantis	8	100	92	92	6.74971e-46	1.91072e-45
GT47	Strep. oralis	8	100	92	92	6.74971e-46	1.91072e-45
GT47	Strep. parasanguinis	8	100	92	92	6.74971e-46	1.91072e-45
GH73	Strep. anginosus	7	97	90	90	1.28224e-45	3.6269e-45
GH0	Strep. sanguinis	2	83	81	81	2.36853e-45	6.68364e-45
GH0	Strep. xiaochunlingii	2	83	81	81	2.36853e-45	6.68364e-45
GH0	Strep.BHI_8	2	83	81	81	2.36853e-45	6.68364e-45
GH13_23	Strep. infantis	8	99	91	91	2.48013e-45	6.97096e-45
GH13_23	Strep. oralis	8	99	91	91	2.48013e-45	6.97096e-45
GH130_1	Strep. oralis	8	99	91	91	2.48013e-45	6.97096e-45
GH3	Strep. infantis	8	99	91	91	2.48013e-45	6.97096e-45
GH3	Strep. oralis	8	99	91	91	2.48013e-45	6.97096e-45
CBM48	Strep. parasanguinis	9	101	92	92	3.60944e-45	9.93363e-45
CBM50	Strep. parasanguinis	9	101	92	92	3.60944e-45	9.93363e-45
CE4	Strep. parasanguinis	9	101	92	92	3.60944e-45	9.93363e-45
CE9	Strep. parasanguinis	9	101	92	92	3.60944e-45	9.93363e-45
GH1	Strep. parasanguinis	9	101	92	92	3.60944e-45	9.93363e-45
GH13	Strep. parasanguinis	9	101	92	92	3.60944e-45	9.93363e-45
GH13_11	Strep. parasanguinis	9	101	92	92	3.60944e-45	9.93363e-45
GH13_14	Strep. parasanguinis	9	101	92	92	3.60944e-45	9.93363e-45
GH13_31	Strep. parasanguinis	9	101	92	92	3.60944e-45	9.93363e-45
GH13_5	Strep. parasanguinis	9	101	92	92	3.60944e-45	9.93363e-45
GH13_9	Strep. parasanguinis	9	101	92	92	3.60944e-45	9.93363e-45
GH23	Strep. parasanguinis	9	101	92	92	3.60944e-45	9.93363e-45
GH25	Strep. parasanguinis	9	101	92	92	3.60944e-45	9.93363e-45
GH28	Strep. parasanguinis	9	101	92	92	3.60944e-45	9.93363e-45
GH32	Strep. parasanguinis	9	101	92	92	3.60944e-45	9.93363e-45
GH38	Strep. parasanguinis	9	101	92	92	3.60944e-45	9.93363e-45
GH5_11	Strep. parasanguinis	9	101	92	92	3.60944e-45	9.93363e-45
GH77	Strep. parasanguinis	9	101	92	92	3.60944e-45	9.93363e-45
GH84	Strep. parasanguinis	9	101	92	92	3.60944e-45	9.93363e-45
GT2	Strep. parasanguinis	9	101	92	92	3.60944e-45	9.93363e-45
GT28	Strep. parasanguinis	9	101	92	92	3.60944e-45	9.93363e-45
GT35	Strep. parasanguinis	9	101	92	92	3.60944e-45	9.93363e-45
GT4	Strep. parasanguinis	9	101	92	92	3.60944e-45	9.93363e-45
GT5	Strep. parasanguinis	9	101	92	92	3.60944e-45	9.93363e-45
GT51	Strep. parasanguinis	9	101	92	92	3.60944e-45	9.93363e-45
GT58	Strep. parasanguinis	9	101	92	92	3.60944e-45	9.93363e-45
GT83	Strep. parasanguinis	9	101	92	92	3.60944e-45	9.93363e-45
GH2	Strep. anginosus	1	79	78	78	6.90965e-45	1.8727e-44
GH2	Strep. caecimuris	1	79	78	78	6.90965e-45	1.8727e-44
GH2	Strep. cristatus	1	79	78	78	6.90965e-45	1.8727e-44
GH2	Strep. pseudopneumoniae	1	79	78	78	6.90965e-45	1.8727e-44
GH2	Strep. rubneri	1	79	78	78	6.90965e-45	1.8727e-44
GH2	Strep. sinensis	1	79	78	78	6.90965e-45	1.8727e-44
GH2	Strep. sp001556435	1	79	78	78	6.90965e-45	1.8727e-44
GH2	Strep. sp001813105	1	79	78	78	6.90965e-45	1.8727e-44
GH2	Strep. sp002238115	1	79	78	78	6.90965e-45	1.8727e-44
GH2	Strep. sp013394695	1	79	78	78	6.90965e-45	1.8727e-44
GH2	Strep. sp029691405	1	79	78	78	6.90965e-45	1.8727e-44
GH2	Strep.BHI_1	1	79	78	78	6.90965e-45	1.8727e-44
GH2	Strep.BHI_10	1	79	78	78	6.90965e-45	1.8727e-44
GH2	Strep.BHI_2	1	79	78	78	6.90965e-45	1.8727e-44
GH2	Strep.BHI_3	1	79	78	78	6.90965e-45	1.8727e-44
GH2	Strep.BHI_4	1	79	78	78	6.90965e-45	1.8727e-44
GH2	Strep.BHI_5	1	79	78	78	6.90965e-45	1.8727e-44
GH2	Strep.BHI_6	1	79	78	78	6.90965e-45	1.8727e-44
GH2	Strep.BHI_7	1	79	78	78	6.90965e-45	1.8727e-44
GH2	Strep.BHI_9	1	79	78	78	6.90965e-45	1.8727e-44
GT0	Strep. infantis	2	82	80	80	9.19087e-45	2.48719e-44
GT0	Strep. sanguinis	2	82	80	80	9.19087e-45	2.48719e-44
GH92	Strep. gordonii	6	93	87	87	9.4454e-45	2.55026e-44
GH92	Strep. hominis	6	93	87	87	9.4454e-45	2.55026e-44
GH92	Strep. salivarius	6	93	87	87	9.4454e-45	2.55026e-44
CBM41	Strep. parasanguinis	9	100	91	91	1.31156e-44	3.53853e-44
GT113	Strep. massiliensis	0	75	75	75	2.15457e-44	5.78229e-44
GT113	Strep. mutans	0	75	75	75	2.15457e-44	5.78229e-44
GT113	Strep. sinensis	0	75	75	75	2.15457e-44	5.78229e-44
GT113	Strep. sp013394695	0	75	75	75	2.15457e-44	5.78229e-44
GT113	Strep.BHI_11	0	75	75	75	2.15457e-44	5.78229e-44
GT113	Strep.BHI_2	0	75	75	75	2.15457e-44	5.78229e-44
GT113	Strep.BHI_8	0	75	75	75	2.15457e-44	5.78229e-44
GH73	Strep. infantis	8	97	89	89	3.34001e-44	8.95022e-44
GH73	Strep. oralis	8	97	89	89	3.34001e-44	8.95022e-44
GH13_23	Strep. parasanguinis	9	99	90	90	4.76115e-44	1.27297e-43
GH130_1	Strep. parasanguinis	9	99	90	90	4.76115e-44	1.27297e-43
GH3	Strep. parasanguinis	9	99	90	90	4.76115e-44	1.27297e-43
AA10	Strep. sp002238115	0	74	74	74	8.56081e-44	2.27862e-43
AA10	Strep. sp029691405	0	74	74	74	8.56081e-44	2.27862e-43
AA10	Strep. sp901875575	0	74	74	74	8.56081e-44	2.27862e-43
AA10	Strep.BHI_1	0	74	74	74	8.56081e-44	2.27862e-43
AA10	Strep.BHI_2	0	74	74	74	8.56081e-44	2.27862e-43
AA10	Strep.BHI_9	0	74	74	74	8.56081e-44	2.27862e-43
GH0	Strep. vestibularis	3	83	80	80	1.38797e-43	3.69159e-43
GH92	Strep. anginosus	7	93	86	86	2.38277e-43	6.32803e-43
GH92	Strep. parasanguinis	7	93	86	86	2.38277e-43	6.32803e-43
GH35	Strep. gordonii	6	90	84	84	4.87835e-43	1.29171e-42
GH35	Strep. hominis	6	90	84	84	4.87835e-43	1.29171e-42
GT30	Strep. gordonii	6	90	84	84	4.87835e-43	1.29171e-42
GT30	Strep. hominis	6	90	84	84	4.87835e-43	1.29171e-42
GT0	Strep. vestibularis	3	82	79	79	5.32456e-43	1.40882e-42
GH2	Strep. xiaochunlingii	2	79	77	77	5.35802e-43	1.41556e-42
GH2	Strep.BHI_8	2	79	77	77	5.35802e-43	1.41556e-42
GH73	Strep. parasanguinis	9	97	88	88	6.25539e-43	1.65142e-42
GT113	Strep. caecimuris	1	75	74	74	1.63747e-42	4.26604e-42
GT113	Strep. constellatus	1	75	74	74	1.63747e-42	4.26604e-42
GT113	Strep. cristatus	1	75	74	74	1.63747e-42	4.26604e-42
GT113	Strep. pseudopneumoniae	1	75	74	74	1.63747e-42	4.26604e-42
GT113	Strep. rubneri	1	75	74	74	1.63747e-42	4.26604e-42
GT113	Strep. sp001556435	1	75	74	74	1.63747e-42	4.26604e-42
GT113	Strep. sp001813105	1	75	74	74	1.63747e-42	4.26604e-42
GT113	Strep. sp002238115	1	75	74	74	1.63747e-42	4.26604e-42
GT113	Strep. sp029691405	1	75	74	74	1.63747e-42	4.26604e-42
GT113	Strep. sp901875575	1	75	74	74	1.63747e-42	4.26604e-42
GT113	Strep.BHI_1	1	75	74	74	1.63747e-42	4.26604e-42
GT113	Strep.BHI_10	1	75	74	74	1.63747e-42	4.26604e-42
GT113	Strep.BHI_3	1	75	74	74	1.63747e-42	4.26604e-42
GT113	Strep.BHI_4	1	75	74	74	1.63747e-42	4.26604e-42
GT113	Strep.BHI_5	1	75	74	74	1.63747e-42	4.26604e-42
GT113	Strep.BHI_6	1	75	74	74	1.63747e-42	4.26604e-42
GT113	Strep.BHI_7	1	75	74	74	1.63747e-42	4.26604e-42
GT113	Strep.BHI_9	1	75	74	74	1.63747e-42	4.26604e-42
GH13_3	Strep. anginosus	0	71	71	71	5.3671e-42	1.38812e-41
GH13_3	Strep. constellatus	0	71	71	71	5.3671e-42	1.38812e-41
GH13_3	Strep. cristatus	0	71	71	71	5.3671e-42	1.38812e-41
GH13_3	Strep. gordonii	0	71	71	71	5.3671e-42	1.38812e-41
GH13_3	Strep. massiliensis	0	71	71	71	5.3671e-42	1.38812e-41
GH13_3	Strep. sanguinis	0	71	71	71	5.3671e-42	1.38812e-41
GH13_3	Strep. sinensis	0	71	71	71	5.3671e-42	1.38812e-41
GH13_3	Strep. sp901875575	0	71	71	71	5.3671e-42	1.38812e-41
GH13_3	Strep. xiaochunlingii	0	71	71	71	5.3671e-42	1.38812e-41
GH13_3	Strep.BHI_5	0	71	71	71	5.3671e-42	1.38812e-41
GH92	Strep. infantis	8	93	85	85	5.99334e-42	1.54784e-41
GH92	Strep. oralis	8	93	85	85	5.99334e-42	1.54784e-41
AA10	Strep. anginosus	1	74	73	73	6.42061e-42	1.63567e-41
AA10	Strep. caecimuris	1	74	73	73	6.42061e-42	1.63567e-41
AA10	Strep. cristatus	1	74	73	73	6.42061e-42	1.63567e-41
AA10	Strep. hominis	1	74	73	73	6.42061e-42	1.63567e-41
AA10	Strep. massiliensis	1	74	73	73	6.42061e-42	1.63567e-41
AA10	Strep. mutans	1	74	73	73	6.42061e-42	1.63567e-41
AA10	Strep. pseudopneumoniae	1	74	73	73	6.42061e-42	1.63567e-41
AA10	Strep. rubneri	1	74	73	73	6.42061e-42	1.63567e-41
AA10	Strep. sinensis	1	74	73	73	6.42061e-42	1.63567e-41
AA10	Strep. sp001556435	1	74	73	73	6.42061e-42	1.63567e-41
AA10	Strep. sp001813105	1	74	73	73	6.42061e-42	1.63567e-41
AA10	Strep. sp013394695	1	74	73	73	6.42061e-42	1.63567e-41
AA10	Strep.BHI_10	1	74	73	73	6.42061e-42	1.63567e-41
AA10	Strep.BHI_11	1	74	73	73	6.42061e-42	1.63567e-41
AA10	Strep.BHI_3	1	74	73	73	6.42061e-42	1.63567e-41
AA10	Strep.BHI_4	1	74	73	73	6.42061e-42	1.63567e-41
AA10	Strep.BHI_5	1	74	73	73	6.42061e-42	1.63567e-41
AA10	Strep.BHI_6	1	74	73	73	6.42061e-42	1.63567e-41
AA10	Strep.BHI_7	1	74	73	73	6.42061e-42	1.63567e-41
GH35	Strep. anginosus	7	90	83	83	1.18817e-41	3.02259e-41
GT30	Strep. anginosus	7	90	83	83	1.18817e-41	3.02259e-41
GT0	Strep. constellatus	4	82	78	78	2.00434e-41	5.0952e-41
GT8	Strep. sp013394695	0	70	70	70	2.13172e-41	5.39209e-41
GT8	Strep. sp901875575	0	70	70	70	2.13172e-41	5.39209e-41
GT8	Strep.BHI_1	0	70	70	70	2.13172e-41	5.39209e-41
GT8	Strep.BHI_10	0	70	70	70	2.13172e-41	5.39209e-41
GT8	Strep.BHI_4	0	70	70	70	2.13172e-41	5.39209e-41
GT8	Strep.BHI_6	0	70	70	70	2.13172e-41	5.39209e-41
GT8	Strep.BHI_8	0	70	70	70	2.13172e-41	5.39209e-41
GH2	Strep. vestibularis	3	79	76	76	2.99677e-41	7.57481e-41
GT113	Strep. sanguinis	2	75	73	73	1.2043e-40	3.03974e-40
GT113	Strep. xiaochunlingii	2	75	73	73	1.2043e-40	3.03974e-40
GH35	Strep. infantis	8	90	82	82	2.90942e-40	7.32287e-40
GH35	Strep. oralis	8	90	82	82	2.90942e-40	7.32287e-40
GT30	Strep. infantis	8	90	82	82	2.90942e-40	7.32287e-40
GT30	Strep. oralis	8	90	82	82	2.90942e-40	7.32287e-40
CBM34	Strep. anginosus	0	68	68	68	3.36185e-40	8.22914e-40
CBM34	Strep. constellatus	0	68	68	68	3.36185e-40	8.22914e-40
CBM34	Strep. hominis	0	68	68	68	3.36185e-40	8.22914e-40
CBM34	Strep. massiliensis	0	68	68	68	3.36185e-40	8.22914e-40
CBM34	Strep. mutans	0	68	68	68	3.36185e-40	8.22914e-40
CBM34	Strep. salivarius	0	68	68	68	3.36185e-40	8.22914e-40
CBM34	Strep. sp001556435	0	68	68	68	3.36185e-40	8.22914e-40
CBM34	Strep. sp901875575	0	68	68	68	3.36185e-40	8.22914e-40
CBM34	Strep. vestibularis	0	68	68	68	3.36185e-40	8.22914e-40
CBM34	Strep. xiaochunlingii	0	68	68	68	3.36185e-40	8.22914e-40
GH13_20	Strep. anginosus	0	68	68	68	3.36185e-40	8.22914e-40
GH13_20	Strep. constellatus	0	68	68	68	3.36185e-40	8.22914e-40
GH13_20	Strep. hominis	0	68	68	68	3.36185e-40	8.22914e-40
GH13_20	Strep. massiliensis	0	68	68	68	3.36185e-40	8.22914e-40
GH13_20	Strep. mutans	0	68	68	68	3.36185e-40	8.22914e-40
GH13_20	Strep. salivarius	0	68	68	68	3.36185e-40	8.22914e-40
GH13_20	Strep. sp001556435	0	68	68	68	3.36185e-40	8.22914e-40
GH13_20	Strep. sp901875575	0	68	68	68	3.36185e-40	8.22914e-40
GH13_20	Strep. vestibularis	0	68	68	68	3.36185e-40	8.22914e-40
GH13_20	Strep. xiaochunlingii	0	68	68	68	3.36185e-40	8.22914e-40
GH20	Strep. constellatus	0	68	68	68	3.36185e-40	8.22914e-40
GH20	Strep. hominis	0	68	68	68	3.36185e-40	8.22914e-40
GH20	Strep. massiliensis	0	68	68	68	3.36185e-40	8.22914e-40
GH20	Strep. mutans	0	68	68	68	3.36185e-40	8.22914e-40
GH20	Strep. salivarius	0	68	68	68	3.36185e-40	8.22914e-40
GH20	Strep. sp001556435	0	68	68	68	3.36185e-40	8.22914e-40
GH20	Strep. sp901875575	0	68	68	68	3.36185e-40	8.22914e-40
GH20	Strep. vestibularis	0	68	68	68	3.36185e-40	8.22914e-40
GH20	Strep.BHI_11	0	68	68	68	3.36185e-40	8.22914e-40
GH29	Strep. anginosus	0	68	68	68	3.36185e-40	8.22914e-40
GH29	Strep. constellatus	0	68	68	68	3.36185e-40	8.22914e-40
GH29	Strep. hominis	0	68	68	68	3.36185e-40	8.22914e-40
GH29	Strep. massiliensis	0	68	68	68	3.36185e-40	8.22914e-40
GH29	Strep. mutans	0	68	68	68	3.36185e-40	8.22914e-40
GH29	Strep. salivarius	0	68	68	68	3.36185e-40	8.22914e-40
GH29	Strep. sanguinis	0	68	68	68	3.36185e-40	8.22914e-40
GH29	Strep. sinensis	0	68	68	68	3.36185e-40	8.22914e-40
GH29	Strep. sp001556435	0	68	68	68	3.36185e-40	8.22914e-40
GH29	Strep. sp901875575	0	68	68	68	3.36185e-40	8.22914e-40
GH29	Strep. vestibularis	0	68	68	68	3.36185e-40	8.22914e-40
GH13_3	Strep. caecimuris	1	71	70	70	3.86431e-40	9.34355e-40
GH13_3	Strep. mutans	1	71	70	70	3.86431e-40	9.34355e-40
GH13_3	Strep. pseudopneumoniae	1	71	70	70	3.86431e-40	9.34355e-40
GH13_3	Strep. rubneri	1	71	70	70	3.86431e-40	9.34355e-40
GH13_3	Strep. sp001556435	1	71	70	70	3.86431e-40	9.34355e-40
GH13_3	Strep. sp001813105	1	71	70	70	3.86431e-40	9.34355e-40
GH13_3	Strep. sp002238115	1	71	70	70	3.86431e-40	9.34355e-40
GH13_3	Strep. sp013394695	1	71	70	70	3.86431e-40	9.34355e-40
GH13_3	Strep. sp029691405	1	71	70	70	3.86431e-40	9.34355e-40
GH13_3	Strep.BHI_1	1	71	70	70	3.86431e-40	9.34355e-40
GH13_3	Strep.BHI_10	1	71	70	70	3.86431e-40	9.34355e-40
GH13_3	Strep.BHI_11	1	71	70	70	3.86431e-40	9.34355e-40
GH13_3	Strep.BHI_2	1	71	70	70	3.86431e-40	9.34355e-40
GH13_3	Strep.BHI_3	1	71	70	70	3.86431e-40	9.34355e-40
GH13_3	Strep.BHI_4	1	71	70	70	3.86431e-40	9.34355e-40
GH13_3	Strep.BHI_6	1	71	70	70	3.86431e-40	9.34355e-40
GH13_3	Strep.BHI_7	1	71	70	70	3.86431e-40	9.34355e-40
GH13_3	Strep.BHI_9	1	71	70	70	3.86431e-40	9.34355e-40
AA10	Strep. constellatus	2	74	72	72	4.65795e-40	1.1232e-39
AA10	Strep. sanguinis	2	74	72	72	4.65795e-40	1.1232e-39
AA10	Strep. xiaochunlingii	2	74	72	72	4.65795e-40	1.1232e-39
AA10	Strep.BHI_8	2	74	72	72	4.65795e-40	1.1232e-39
GT8	Strep. caecimuris	1	70	69	69	1.51352e-39	3.60574e-39
GT8	Strep. cristatus	1	70	69	69	1.51352e-39	3.60574e-39
GT8	Strep. massiliensis	1	70	69	69	1.51352e-39	3.60574e-39
GT8	Strep. mutans	1	70	69	69	1.51352e-39	3.60574e-39
GT8	Strep. pseudopneumoniae	1	70	69	69	1.51352e-39	3.60574e-39
GT8	Strep. rubneri	1	70	69	69	1.51352e-39	3.60574e-39
GT8	Strep. sinensis	1	70	69	69	1.51352e-39	3.60574e-39
GT8	Strep. sp001556435	1	70	69	69	1.51352e-39	3.60574e-39
GT8	Strep. sp001813105	1	70	69	69	1.51352e-39	3.60574e-39
GT8	Strep. sp002238115	1	70	69	69	1.51352e-39	3.60574e-39
GT8	Strep. sp029691405	1	70	69	69	1.51352e-39	3.60574e-39
GT8	Strep. xiaochunlingii	1	70	69	69	1.51352e-39	3.60574e-39
GT8	Strep.BHI_11	1	70	69	69	1.51352e-39	3.60574e-39
GT8	Strep.BHI_2	1	70	69	69	1.51352e-39	3.60574e-39
GT8	Strep.BHI_3	1	70	69	69	1.51352e-39	3.60574e-39
GT8	Strep.BHI_5	1	70	69	69	1.51352e-39	3.60574e-39
GT8	Strep.BHI_7	1	70	69	69	1.51352e-39	3.60574e-39
GT8	Strep.BHI_9	1	70	69	69	1.51352e-39	3.60574e-39
GH0	Strep. gordonii	6	83	77	77	4.70691e-39	1.11986e-38
GH0	Strep. salivarius	6	83	77	77	4.70691e-39	1.11986e-38
GH35	Strep. parasanguinis	9	90	81	81	4.97117e-39	1.18115e-38
GT30	Strep. parasanguinis	9	90	81	81	4.97117e-39	1.18115e-38
GT113	Strep. anginosus	3	75	72	72	6.4141e-39	1.52095e-38
GT113	Strep. hominis	3	75	72	72	6.4141e-39	1.52095e-38
GT113	Strep. vestibularis	3	75	72	72	6.4141e-39	1.52095e-38
GT0	Strep. gordonii	6	82	76	76	1.73929e-38	4.11609e-38
GT0	Strep. hominis	6	82	76	76	1.73929e-38	4.11609e-38
GT0	Strep. salivarius	6	82	76	76	1.73929e-38	4.11609e-38
CE7	Strep. anginosus	0	65	65	65	2.10377e-38	4.91338e-38
CE7	Strep. constellatus	0	65	65	65	2.10377e-38	4.91338e-38
CE7	Strep. gordonii	0	65	65	65	2.10377e-38	4.91338e-38
CE7	Strep. massiliensis	0	65	65	65	2.10377e-38	4.91338e-38
CE7	Strep. mutans	0	65	65	65	2.10377e-38	4.91338e-38
CE7	Strep. salivarius	0	65	65	65	2.10377e-38	4.91338e-38
CE7	Strep. sp001556435	0	65	65	65	2.10377e-38	4.91338e-38
CE7	Strep. vestibularis	0	65	65	65	2.10377e-38	4.91338e-38
GH125	Strep. anginosus	0	65	65	65	2.10377e-38	4.91338e-38
GH125	Strep. constellatus	0	65	65	65	2.10377e-38	4.91338e-38
GH125	Strep. hominis	0	65	65	65	2.10377e-38	4.91338e-38
GH125	Strep. massiliensis	0	65	65	65	2.10377e-38	4.91338e-38
GH125	Strep. mutans	0	65	65	65	2.10377e-38	4.91338e-38
GH125	Strep. salivarius	0	65	65	65	2.10377e-38	4.91338e-38
GH125	Strep. sanguinis	0	65	65	65	2.10377e-38	4.91338e-38
GH125	Strep. sinensis	0	65	65	65	2.10377e-38	4.91338e-38
GH125	Strep. sp001556435	0	65	65	65	2.10377e-38	4.91338e-38
GH125	Strep. sp901875575	0	65	65	65	2.10377e-38	4.91338e-38
GH125	Strep. vestibularis	0	65	65	65	2.10377e-38	4.91338e-38
GH125	Strep.BHI_11	0	65	65	65	2.10377e-38	4.91338e-38
CBM34	Strep. caecimuris	1	68	67	67	2.31968e-38	5.16063e-38
CBM34	Strep. cristatus	1	68	67	67	2.31968e-38	5.16063e-38
CBM34	Strep. pseudopneumoniae	1	68	67	67	2.31968e-38	5.16063e-38
CBM34	Strep. rubneri	1	68	67	67	2.31968e-38	5.16063e-38
CBM34	Strep. sinensis	1	68	67	67	2.31968e-38	5.16063e-38
CBM34	Strep. sp001813105	1	68	67	67	2.31968e-38	5.16063e-38
CBM34	Strep. sp002238115	1	68	67	67	2.31968e-38	5.16063e-38
CBM34	Strep. sp013394695	1	68	67	67	2.31968e-38	5.16063e-38
CBM34	Strep. sp029691405	1	68	67	67	2.31968e-38	5.16063e-38
CBM34	Strep.BHI_1	1	68	67	67	2.31968e-38	5.16063e-38
CBM34	Strep.BHI_10	1	68	67	67	2.31968e-38	5.16063e-38
CBM34	Strep.BHI_11	1	68	67	67	2.31968e-38	5.16063e-38
CBM34	Strep.BHI_2	1	68	67	67	2.31968e-38	5.16063e-38
CBM34	Strep.BHI_3	1	68	67	67	2.31968e-38	5.16063e-38
CBM34	Strep.BHI_4	1	68	67	67	2.31968e-38	5.16063e-38
CBM34	Strep.BHI_5	1	68	67	67	2.31968e-38	5.16063e-38
CBM34	Strep.BHI_6	1	68	67	67	2.31968e-38	5.16063e-38
CBM34	Strep.BHI_7	1	68	67	67	2.31968e-38	5.16063e-38
CBM34	Strep.BHI_9	1	68	67	67	2.31968e-38	5.16063e-38
GH13_20	Strep. caecimuris	1	68	67	67	2.31968e-38	5.16063e-38
GH13_20	Strep. cristatus	1	68	67	67	2.31968e-38	5.16063e-38
GH13_20	Strep. pseudopneumoniae	1	68	67	67	2.31968e-38	5.16063e-38
GH13_20	Strep. rubneri	1	68	67	67	2.31968e-38	5.16063e-38
GH13_20	Strep. sinensis	1	68	67	67	2.31968e-38	5.16063e-38
GH13_20	Strep. sp001813105	1	68	67	67	2.31968e-38	5.16063e-38
GH13_20	Strep. sp002238115	1	68	67	67	2.31968e-38	5.16063e-38
GH13_20	Strep. sp013394695	1	68	67	67	2.31968e-38	5.16063e-38
GH13_20	Strep. sp029691405	1	68	67	67	2.31968e-38	5.16063e-38
GH13_20	Strep.BHI_1	1	68	67	67	2.31968e-38	5.16063e-38
GH13_20	Strep.BHI_10	1	68	67	67	2.31968e-38	5.16063e-38
GH13_20	Strep.BHI_11	1	68	67	67	2.31968e-38	5.16063e-38
GH13_20	Strep.BHI_2	1	68	67	67	2.31968e-38	5.16063e-38
GH13_20	Strep.BHI_3	1	68	67	67	2.31968e-38	5.16063e-38
GH13_20	Strep.BHI_4	1	68	67	67	2.31968e-38	5.16063e-38
GH13_20	Strep.BHI_5	1	68	67	67	2.31968e-38	5.16063e-38
GH13_20	Strep.BHI_6	1	68	67	67	2.31968e-38	5.16063e-38
GH13_20	Strep.BHI_7	1	68	67	67	2.31968e-38	5.16063e-38
GH13_20	Strep.BHI_9	1	68	67	67	2.31968e-38	5.16063e-38
GH20	Strep. anginosus	1	68	67	67	2.31968e-38	5.16063e-38
GH20	Strep. caecimuris	1	68	67	67	2.31968e-38	5.16063e-38
GH20	Strep. cristatus	1	68	67	67	2.31968e-38	5.16063e-38
GH20	Strep. pseudopneumoniae	1	68	67	67	2.31968e-38	5.16063e-38
GH20	Strep. rubneri	1	68	67	67	2.31968e-38	5.16063e-38
GH20	Strep. sanguinis	1	68	67	67	2.31968e-38	5.16063e-38
GH20	Strep. sinensis	1	68	67	67	2.31968e-38	5.16063e-38
GH20	Strep. sp001813105	1	68	67	67	2.31968e-38	5.16063e-38
GH20	Strep. sp002238115	1	68	67	67	2.31968e-38	5.16063e-38
GH20	Strep. sp013394695	1	68	67	67	2.31968e-38	5.16063e-38
GH20	Strep. sp029691405	1	68	67	67	2.31968e-38	5.16063e-38
GH20	Strep.BHI_1	1	68	67	67	2.31968e-38	5.16063e-38
GH20	Strep.BHI_10	1	68	67	67	2.31968e-38	5.16063e-38
GH20	Strep.BHI_2	1	68	67	67	2.31968e-38	5.16063e-38
GH20	Strep.BHI_3	1	68	67	67	2.31968e-38	5.16063e-38
GH20	Strep.BHI_4	1	68	67	67	2.31968e-38	5.16063e-38
GH20	Strep.BHI_5	1	68	67	67	2.31968e-38	5.16063e-38
GH20	Strep.BHI_6	1	68	67	67	2.31968e-38	5.16063e-38
GH20	Strep.BHI_7	1	68	67	67	2.31968e-38	5.16063e-38
GH20	Strep.BHI_9	1	68	67	67	2.31968e-38	5.16063e-38
GH29	Strep. caecimuris	1	68	67	67	2.31968e-38	5.16063e-38
GH29	Strep. cristatus	1	68	67	67	2.31968e-38	5.16063e-38
GH29	Strep. pseudopneumoniae	1	68	67	67	2.31968e-38	5.16063e-38
GH29	Strep. rubneri	1	68	67	67	2.31968e-38	5.16063e-38
GH29	Strep. sp001813105	1	68	67	67	2.31968e-38	5.16063e-38
GH29	Strep. sp002238115	1	68	67	67	2.31968e-38	5.16063e-38
GH29	Strep. sp013394695	1	68	67	67	2.31968e-38	5.16063e-38
GH29	Strep. sp029691405	1	68	67	67	2.31968e-38	5.16063e-38
GH29	Strep.BHI_1	1	68	67	67	2.31968e-38	5.16063e-38
GH29	Strep.BHI_10	1	68	67	67	2.31968e-38	5.16063e-38
GH29	Strep.BHI_11	1	68	67	67	2.31968e-38	5.16063e-38
GH29	Strep.BHI_2	1	68	67	67	2.31968e-38	5.16063e-38
GH29	Strep.BHI_3	1	68	67	67	2.31968e-38	5.16063e-38
GH29	Strep.BHI_4	1	68	67	67	2.31968e-38	5.16063e-38
GH29	Strep.BHI_5	1	68	67	67	2.31968e-38	5.16063e-38
GH29	Strep.BHI_6	1	68	67	67	2.31968e-38	5.16063e-38
GH29	Strep.BHI_7	1	68	67	67	2.31968e-38	5.16063e-38
GH29	Strep.BHI_9	1	68	67	67	2.31968e-38	5.16063e-38
AA10	Strep. vestibularis	3	74	71	71	2.44973e-38	5.44656e-38
GH13_3	Strep.BHI_8	2	71	69	69	2.68758e-38	5.97166e-38
CBM48	Strep. mitis	15	101	86	86	4.78249e-38	1.04313e-37
CBM50	Strep. mitis	15	101	86	86	4.78249e-38	1.04313e-37
CE4	Strep. mitis	15	101	86	86	4.78249e-38	1.04313e-37
CE9	Strep. mitis	15	101	86	86	4.78249e-38	1.04313e-37
GH1	Strep. mitis	15	101	86	86	4.78249e-38	1.04313e-37
GH13	Strep. mitis	15	101	86	86	4.78249e-38	1.04313e-37
GH13_11	Strep. mitis	15	101	86	86	4.78249e-38	1.04313e-37
GH13_14	Strep. mitis	15	101	86	86	4.78249e-38	1.04313e-37
GH13_23	Strep. mitis	14	99	85	85	4.76111e-38	1.04313e-37
GH13_31	Strep. mitis	15	101	86	86	4.78249e-38	1.04313e-37
GH13_5	Strep. mitis	15	101	86	86	4.78249e-38	1.04313e-37
GH13_9	Strep. mitis	15	101	86	86	4.78249e-38	1.04313e-37
GH130_1	Strep. mitis	14	99	85	85	4.76111e-38	1.04313e-37
GH23	Strep. mitis	15	101	86	86	4.78249e-38	1.04313e-37
GH25	Strep. mitis	15	101	86	86	4.78249e-38	1.04313e-37
GH28	Strep. mitis	15	101	86	86	4.78249e-38	1.04313e-37
GH3	Strep. mitis	14	99	85	85	4.76111e-38	1.04313e-37
GH32	Strep. mitis	15	101	86	86	4.78249e-38	1.04313e-37
GH38	Strep. mitis	15	101	86	86	4.78249e-38	1.04313e-37
GH5_11	Strep. mitis	15	101	86	86	4.78249e-38	1.04313e-37
GH77	Strep. mitis	15	101	86	86	4.78249e-38	1.04313e-37
GH84	Strep. mitis	15	101	86	86	4.78249e-38	1.04313e-37
GT2	Strep. mitis	15	101	86	86	4.78249e-38	1.04313e-37
GT28	Strep. mitis	15	101	86	86	4.78249e-38	1.04313e-37
GT35	Strep. mitis	15	101	86	86	4.78249e-38	1.04313e-37
GT4	Strep. mitis	15	101	86	86	4.78249e-38	1.04313e-37
GT5	Strep. mitis	15	101	86	86	4.78249e-38	1.04313e-37
GT51	Strep. mitis	15	101	86	86	4.78249e-38	1.04313e-37
GT58	Strep. mitis	15	101	86	86	4.78249e-38	1.04313e-37
GT83	Strep. mitis	15	101	86	86	4.78249e-38	1.04313e-37
CBM71	Strep. anginosus	0	64	64	64	8.35033e-38	1.80805e-37
CBM71	Strep. constellatus	0	64	64	64	8.35033e-38	1.80805e-37
CBM71	Strep. hominis	0	64	64	64	8.35033e-38	1.80805e-37
CBM71	Strep. massiliensis	0	64	64	64	8.35033e-38	1.80805e-37
CBM71	Strep. mutans	0	64	64	64	8.35033e-38	1.80805e-37
CBM71	Strep. salivarius	0	64	64	64	8.35033e-38	1.80805e-37
CBM71	Strep. sanguinis	0	64	64	64	8.35033e-38	1.80805e-37
CBM71	Strep. sp001556435	0	64	64	64	8.35033e-38	1.80805e-37
CBM71	Strep. sp001813105	0	64	64	64	8.35033e-38	1.80805e-37
CBM71	Strep. sp901875575	0	64	64	64	8.35033e-38	1.80805e-37
CBM71	Strep. vestibularis	0	64	64	64	8.35033e-38	1.80805e-37
CBM71	Strep.BHI_11	0	64	64	64	8.35033e-38	1.80805e-37
GT8	Strep. sanguinis	2	70	68	68	1.03751e-37	2.24511e-37
CBM41	Strep. mitis	15	100	85	85	1.63144e-37	3.52606e-37
GT47	Strep. mitis	15	100	85	85	1.63144e-37	3.52606e-37
GH13_29	Strep. cristatus	0	63	63	63	3.31404e-37	7.03887e-37
GH13_29	Strep. infantis	0	63	63	63	3.31404e-37	7.03887e-37
GH13_29	Strep. pseudopneumoniae	0	63	63	63	3.31404e-37	7.03887e-37
GH13_29	Strep. rubneri	0	63	63	63	3.31404e-37	7.03887e-37
GH13_29	Strep. sp001813105	0	63	63	63	3.31404e-37	7.03887e-37
GH13_29	Strep. sp002238115	0	63	63	63	3.31404e-37	7.03887e-37
GH13_29	Strep. sp013394695	0	63	63	63	3.31404e-37	7.03887e-37
GH13_29	Strep. sp029691405	0	63	63	63	3.31404e-37	7.03887e-37
GH13_29	Strep. xiaochunlingii	0	63	63	63	3.31404e-37	7.03887e-37
GH13_29	Strep.BHI_1	0	63	63	63	3.31404e-37	7.03887e-37
GH13_29	Strep.BHI_10	0	63	63	63	3.31404e-37	7.03887e-37
GH13_29	Strep.BHI_3	0	63	63	63	3.31404e-37	7.03887e-37
GH13_29	Strep.BHI_5	0	63	63	63	3.31404e-37	7.03887e-37
GH13_29	Strep.BHI_6	0	63	63	63	3.31404e-37	7.03887e-37
GH13_29	Strep.BHI_7	0	63	63	63	3.31404e-37	7.03887e-37
GH13_29	Strep.BHI_9	0	63	63	63	3.31404e-37	7.03887e-37
GT1	Strep. cristatus	0	63	63	63	3.31404e-37	7.03887e-37
GT1	Strep. sp001556435	0	63	63	63	3.31404e-37	7.03887e-37
GT1	Strep. sp029691405	0	63	63	63	3.31404e-37	7.03887e-37
GT1	Strep. sp901875575	0	63	63	63	3.31404e-37	7.03887e-37
GT1	Strep. vestibularis	0	63	63	63	3.31404e-37	7.03887e-37
GT1	Strep.BHI_1	0	63	63	63	3.31404e-37	7.03887e-37
GT1	Strep.BHI_10	0	63	63	63	3.31404e-37	7.03887e-37
GT1	Strep.BHI_11	0	63	63	63	3.31404e-37	7.03887e-37
GT1	Strep.BHI_2	0	63	63	63	3.31404e-37	7.03887e-37
GT1	Strep.BHI_4	0	63	63	63	3.31404e-37	7.03887e-37
GT1	Strep.BHI_6	0	63	63	63	3.31404e-37	7.03887e-37
GT1	Strep.BHI_8	0	63	63	63	3.31404e-37	7.03887e-37
GT1	Strep.BHI_9	0	63	63	63	3.31404e-37	7.03887e-37
GT0	Strep. anginosus	7	82	75	75	3.83171e-37	8.1287e-37
GT0	Strep. oralis	7	82	75	75	3.83171e-37	8.1287e-37
GH73	Strep. mitis	14	97	83	83	5.638e-37	1.19535e-36
AA10	Strep. oralis	4	74	70	70	8.25135e-37	1.74838e-36
GH2	Strep. gordonii	6	79	73	73	8.72384e-37	1.8463e-36
GH2	Strep. salivarius	6	79	73	73	8.72384e-37	1.8463e-36
GH13_12	Strep. caecimuris	0	62	62	62	1.31509e-36	2.75868e-36
GH13_12	Strep. constellatus	0	62	62	62	1.31509e-36	2.75868e-36
GH13_12	Strep. cristatus	0	62	62	62	1.31509e-36	2.75868e-36
GH13_12	Strep. gordonii	0	62	62	62	1.31509e-36	2.75868e-36
GH13_12	Strep. massiliensis	0	62	62	62	1.31509e-36	2.75868e-36
GH13_12	Strep. mutans	0	62	62	62	1.31509e-36	2.75868e-36
GH13_12	Strep. parasanguinis	0	62	62	62	1.31509e-36	2.75868e-36
GH13_12	Strep. sp001813105	0	62	62	62	1.31509e-36	2.75868e-36
GH13_12	Strep. sp013394695	0	62	62	62	1.31509e-36	2.75868e-36
GH13_12	Strep. sp901875575	0	62	62	62	1.31509e-36	2.75868e-36
GH13_12	Strep. vestibularis	0	62	62	62	1.31509e-36	2.75868e-36
GH13_12	Strep. xiaochunlingii	0	62	62	62	1.31509e-36	2.75868e-36
GH13_12	Strep.BHI_11	0	62	62	62	1.31509e-36	2.75868e-36
GH13_12	Strep.BHI_3	0	62	62	62	1.31509e-36	2.75868e-36
GH13_12	Strep.BHI_7	0	62	62	62	1.31509e-36	2.75868e-36
CE7	Strep. caecimuris	1	65	64	64	1.38849e-36	2.84564e-36
CE7	Strep. cristatus	1	65	64	64	1.38849e-36	2.84564e-36
CE7	Strep. pseudopneumoniae	1	65	64	64	1.38849e-36	2.84564e-36
CE7	Strep. rubneri	1	65	64	64	1.38849e-36	2.84564e-36
CE7	Strep. sanguinis	1	65	64	64	1.38849e-36	2.84564e-36
CE7	Strep. sinensis	1	65	64	64	1.38849e-36	2.84564e-36
CE7	Strep. sp001813105	1	65	64	64	1.38849e-36	2.84564e-36
CE7	Strep. sp002238115	1	65	64	64	1.38849e-36	2.84564e-36
CE7	Strep. sp013394695	1	65	64	64	1.38849e-36	2.84564e-36
CE7	Strep. sp029691405	1	65	64	64	1.38849e-36	2.84564e-36
CE7	Strep. sp901875575	1	65	64	64	1.38849e-36	2.84564e-36
CE7	Strep.BHI_1	1	65	64	64	1.38849e-36	2.84564e-36
CE7	Strep.BHI_10	1	65	64	64	1.38849e-36	2.84564e-36
CE7	Strep.BHI_11	1	65	64	64	1.38849e-36	2.84564e-36
CE7	Strep.BHI_2	1	65	64	64	1.38849e-36	2.84564e-36
CE7	Strep.BHI_3	1	65	64	64	1.38849e-36	2.84564e-36
CE7	Strep.BHI_4	1	65	64	64	1.38849e-36	2.84564e-36
CE7	Strep.BHI_5	1	65	64	64	1.38849e-36	2.84564e-36
CE7	Strep.BHI_6	1	65	64	64	1.38849e-36	2.84564e-36
CE7	Strep.BHI_7	1	65	64	64	1.38849e-36	2.84564e-36
CE7	Strep.BHI_9	1	65	64	64	1.38849e-36	2.84564e-36
GH125	Strep. caecimuris	1	65	64	64	1.38849e-36	2.84564e-36
GH125	Strep. cristatus	1	65	64	64	1.38849e-36	2.84564e-36
GH125	Strep. pseudopneumoniae	1	65	64	64	1.38849e-36	2.84564e-36
GH125	Strep. rubneri	1	65	64	64	1.38849e-36	2.84564e-36
GH125	Strep. sp001813105	1	65	64	64	1.38849e-36	2.84564e-36
GH125	Strep. sp002238115	1	65	64	64	1.38849e-36	2.84564e-36
GH125	Strep. sp013394695	1	65	64	64	1.38849e-36	2.84564e-36
GH125	Strep. sp029691405	1	65	64	64	1.38849e-36	2.84564e-36
GH125	Strep.BHI_1	1	65	64	64	1.38849e-36	2.84564e-36
GH125	Strep.BHI_10	1	65	64	64	1.38849e-36	2.84564e-36
GH125	Strep.BHI_2	1	65	64	64	1.38849e-36	2.84564e-36
GH125	Strep.BHI_3	1	65	64	64	1.38849e-36	2.84564e-36
GH125	Strep.BHI_4	1	65	64	64	1.38849e-36	2.84564e-36
GH125	Strep.BHI_5	1	65	64	64	1.38849e-36	2.84564e-36
GH125	Strep.BHI_6	1	65	64	64	1.38849e-36	2.84564e-36
GH125	Strep.BHI_7	1	65	64	64	1.38849e-36	2.84564e-36
GH125	Strep.BHI_9	1	65	64	64	1.38849e-36	2.84564e-36
GH13_3	Strep. hominis	3	71	68	68	1.35962e-36	2.84564e-36
GH13_3	Strep. vestibularis	3	71	68	68	1.35962e-36	2.84564e-36
CBM34	Strep. sanguinis	2	68	66	66	1.54377e-36	3.14939e-36
CBM34	Strep.BHI_8	2	68	66	66	1.54377e-36	3.14939e-36
GH13_20	Strep. sanguinis	2	68	66	66	1.54377e-36	3.14939e-36
GH13_20	Strep.BHI_8	2	68	66	66	1.54377e-36	3.14939e-36
GH20	Strep. xiaochunlingii	2	68	66	66	1.54377e-36	3.14939e-36
GH20	Strep.BHI_8	2	68	66	66	1.54377e-36	3.14939e-36
GH29	Strep. xiaochunlingii	2	68	66	66	1.54377e-36	3.14939e-36
GH29	Strep.BHI_8	2	68	66	66	1.54377e-36	3.14939e-36
GH0	Strep. infantis	8	83	75	75	2.41148e-36	4.91396e-36
GH0	Strep. oralis	8	83	75	75	2.41148e-36	4.91396e-36
GT8	Strep. infantis	3	70	67	67	5.17939e-36	1.05362e-35
GT8	Strep. oralis	3	70	67	67	5.17939e-36	1.05362e-35
GT8	Strep. vestibularis	3	70	67	67	5.17939e-36	1.05362e-35
CBM71	Strep. caecimuris	1	64	63	63	5.42772e-36	1.09352e-35
CBM71	Strep. cristatus	1	64	63	63	5.42772e-36	1.09352e-35
CBM71	Strep. pseudopneumoniae	1	64	63	63	5.42772e-36	1.09352e-35
CBM71	Strep. rubneri	1	64	63	63	5.42772e-36	1.09352e-35
CBM71	Strep. sinensis	1	64	63	63	5.42772e-36	1.09352e-35
CBM71	Strep. sp002238115	1	64	63	63	5.42772e-36	1.09352e-35
CBM71	Strep. sp013394695	1	64	63	63	5.42772e-36	1.09352e-35
CBM71	Strep. sp029691405	1	64	63	63	5.42772e-36	1.09352e-35
CBM71	Strep.BHI_1	1	64	63	63	5.42772e-36	1.09352e-35
CBM71	Strep.BHI_10	1	64	63	63	5.42772e-36	1.09352e-35
CBM71	Strep.BHI_2	1	64	63	63	5.42772e-36	1.09352e-35
CBM71	Strep.BHI_3	1	64	63	63	5.42772e-36	1.09352e-35
CBM71	Strep.BHI_4	1	64	63	63	5.42772e-36	1.09352e-35
CBM71	Strep.BHI_5	1	64	63	63	5.42772e-36	1.09352e-35
CBM71	Strep.BHI_6	1	64	63	63	5.42772e-36	1.09352e-35
CBM71	Strep.BHI_7	1	64	63	63	5.42772e-36	1.09352e-35
CBM71	Strep.BHI_9	1	64	63	63	5.42772e-36	1.09352e-35
GT0	Strep. parasanguinis	8	82	74	74	8.71171e-36	1.75415e-35
GH13_29	Strep. caecimuris	1	63	62	62	2.12098e-35	4.21594e-35
GH13_29	Strep. massiliensis	1	63	62	62	2.12098e-35	4.21594e-35
GH13_29	Strep. mutans	1	63	62	62	2.12098e-35	4.21594e-35
GH13_29	Strep. sinensis	1	63	62	62	2.12098e-35	4.21594e-35
GH13_29	Strep. sp001556435	1	63	62	62	2.12098e-35	4.21594e-35
GH13_29	Strep. sp901875575	1	63	62	62	2.12098e-35	4.21594e-35
GH13_29	Strep.BHI_11	1	63	62	62	2.12098e-35	4.21594e-35
GH13_29	Strep.BHI_2	1	63	62	62	2.12098e-35	4.21594e-35
GH13_29	Strep.BHI_4	1	63	62	62	2.12098e-35	4.21594e-35
GT1	Strep. caecimuris	1	63	62	62	2.12098e-35	4.21594e-35
GT1	Strep. massiliensis	1	63	62	62	2.12098e-35	4.21594e-35
GT1	Strep. mutans	1	63	62	62	2.12098e-35	4.21594e-35
GT1	Strep. pseudopneumoniae	1	63	62	62	2.12098e-35	4.21594e-35
GT1	Strep. rubneri	1	63	62	62	2.12098e-35	4.21594e-35
GT1	Strep. salivarius	1	63	62	62	2.12098e-35	4.21594e-35
GT1	Strep. sinensis	1	63	62	62	2.12098e-35	4.21594e-35
GT1	Strep. sp001813105	1	63	62	62	2.12098e-35	4.21594e-35
GT1	Strep. sp002238115	1	63	62	62	2.12098e-35	4.21594e-35
GT1	Strep. sp013394695	1	63	62	62	2.12098e-35	4.21594e-35
GT1	Strep. xiaochunlingii	1	63	62	62	2.12098e-35	4.21594e-35
GT1	Strep.BHI_3	1	63	62	62	2.12098e-35	4.21594e-35
GT1	Strep.BHI_5	1	63	62	62	2.12098e-35	4.21594e-35
GT1	Strep.BHI_7	1	63	62	62	2.12098e-35	4.21594e-35
GH0	Strep. parasanguinis	9	83	74	74	3.72371e-35	7.3976e-35
GH13_12	Strep. pseudopneumoniae	1	62	61	61	8.28509e-35	1.63409e-34
GH13_12	Strep. rubneri	1	62	61	61	8.28509e-35	1.63409e-34
GH13_12	Strep. sinensis	1	62	61	61	8.28509e-35	1.63409e-34
GH13_12	Strep. sp001556435	1	62	61	61	8.28509e-35	1.63409e-34
GH13_12	Strep. sp002238115	1	62	61	61	8.28509e-35	1.63409e-34
GH13_12	Strep. sp029691405	1	62	61	61	8.28509e-35	1.63409e-34
GH13_12	Strep.BHI_1	1	62	61	61	8.28509e-35	1.63409e-34
GH13_12	Strep.BHI_10	1	62	61	61	8.28509e-35	1.63409e-34
GH13_12	Strep.BHI_2	1	62	61	61	8.28509e-35	1.63409e-34
GH13_12	Strep.BHI_4	1	62	61	61	8.28509e-35	1.63409e-34
GH13_12	Strep.BHI_5	1	62	61	61	8.28509e-35	1.63409e-34
GH13_12	Strep.BHI_6	1	62	61	61	8.28509e-35	1.63409e-34
GH13_12	Strep.BHI_9	1	62	61	61	8.28509e-35	1.63409e-34
CE7	Strep. hominis	2	65	63	63	8.82428e-35	1.73564e-34
CE7	Strep. xiaochunlingii	2	65	63	63	8.82428e-35	1.73564e-34
CE7	Strep.BHI_8	2	65	63	63	8.82428e-35	1.73564e-34
GH125	Strep. xiaochunlingii	2	65	63	63	8.82428e-35	1.73564e-34
GH125	Strep.BHI_8	2	65	63	63	8.82428e-35	1.73564e-34
GT113	Strep. gordonii	6	75	69	69	1.59003e-34	3.1188e-34
GT113	Strep. infantis	6	75	69	69	1.59003e-34	3.1188e-34
GT113	Strep. oralis	6	75	69	69	1.59003e-34	3.1188e-34
GT113	Strep. parasanguinis	6	75	69	69	1.59003e-34	3.1188e-34
GT113	Strep. salivarius	6	75	69	69	1.59003e-34	3.1188e-34
GT8	Strep. constellatus	4	70	66	66	1.64216e-34	3.21928e-34
CBM71	Strep. xiaochunlingii	2	64	62	62	3.39526e-34	6.64874e-34
CBM71	Strep.BHI_8	2	64	62	62	3.39526e-34	6.64874e-34
GH2	Strep. infantis	8	79	71	71	4.07717e-34	7.97533e-34
GH2	Strep. oralis	8	79	71	71	4.07717e-34	7.97533e-34
AA10	Strep. gordonii	6	74	68	68	5.82576e-34	1.13832e-33
AA10	Strep. salivarius	6	74	68	68	5.82576e-34	1.13832e-33
GH92	Strep. mitis	15	93	78	78	8.36178e-34	1.63295e-33
GH13_29	Strep. sanguinis	2	63	61	61	1.30557e-33	2.54543e-33
GH13_29	Strep.BHI_8	2	63	61	61	1.30557e-33	2.54543e-33
GT1	Strep. sanguinis	2	63	61	61	1.30557e-33	2.54543e-33
GH13_12	Strep. sanguinis	2	62	60	60	5.01711e-33	9.77102e-33
GH13_12	Strep.BHI_8	2	62	60	60	5.01711e-33	9.77102e-33
CBM32	Strep. constellatus	0	56	56	56	5.12046e-33	9.81674e-33
CBM32	Strep. hominis	0	56	56	56	5.12046e-33	9.81674e-33
CBM32	Strep. massiliensis	0	56	56	56	5.12046e-33	9.81674e-33
CBM32	Strep. mutans	0	56	56	56	5.12046e-33	9.81674e-33
CBM32	Strep. salivarius	0	56	56	56	5.12046e-33	9.81674e-33
CBM32	Strep. sanguinis	0	56	56	56	5.12046e-33	9.81674e-33
CBM32	Strep. sp001556435	0	56	56	56	5.12046e-33	9.81674e-33
CBM32	Strep. sp901875575	0	56	56	56	5.12046e-33	9.81674e-33
CBM32	Strep. vestibularis	0	56	56	56	5.12046e-33	9.81674e-33
CBM32	Strep.BHI_11	0	56	56	56	5.12046e-33	9.81674e-33
CBM32	Strep.BHI_2	0	56	56	56	5.12046e-33	9.81674e-33
CBM32	Strep.BHI_8	0	56	56	56	5.12046e-33	9.81674e-33
GH36	Strep. infantis	0	56	56	56	5.12046e-33	9.81674e-33
GH36	Strep. massiliensis	0	56	56	56	5.12046e-33	9.81674e-33
GH36	Strep. pseudopneumoniae	0	56	56	56	5.12046e-33	9.81674e-33
GH36	Strep. salivarius	0	56	56	56	5.12046e-33	9.81674e-33
GH36	Strep. sp002238115	0	56	56	56	5.12046e-33	9.81674e-33
GH36	Strep. sp013394695	0	56	56	56	5.12046e-33	9.81674e-33
GH36	Strep. sp029691405	0	56	56	56	5.12046e-33	9.81674e-33
GH36	Strep. sp901875575	0	56	56	56	5.12046e-33	9.81674e-33
GH36	Strep. vestibularis	0	56	56	56	5.12046e-33	9.81674e-33
GH36	Strep. xiaochunlingii	0	56	56	56	5.12046e-33	9.81674e-33
GH36	Strep.BHI_1	0	56	56	56	5.12046e-33	9.81674e-33
GH36	Strep.BHI_2	0	56	56	56	5.12046e-33	9.81674e-33
GH36	Strep.BHI_3	0	56	56	56	5.12046e-33	9.81674e-33
GH36	Strep.BHI_5	0	56	56	56	5.12046e-33	9.81674e-33
GH36	Strep.BHI_6	0	56	56	56	5.12046e-33	9.81674e-33
GH36	Strep.BHI_7	0	56	56	56	5.12046e-33	9.81674e-33
GH36	Strep.BHI_9	0	56	56	56	5.12046e-33	9.81674e-33
GH2	Strep. parasanguinis	9	79	70	70	5.91242e-33	1.1329e-32
GH13_3	Strep. salivarius	6	71	65	65	2.84471e-32	5.4479e-32
GH35	Strep. mitis	15	90	75	75	3.1639e-32	6.05268e-32
GT30	Strep. mitis	15	90	75	75	3.1639e-32	6.05268e-32
GH13_29	Strep. vestibularis	3	63	60	60	5.90714e-32	1.12885e-31
GT1	Strep. oralis	3	63	60	60	5.90714e-32	1.12885e-31
GH85	Strep. anginosus	0	54	54	54	8.04577e-32	1.52608e-31
GH85	Strep. constellatus	0	54	54	54	8.04577e-32	1.52608e-31
GH85	Strep. hominis	0	54	54	54	8.04577e-32	1.52608e-31
GH85	Strep. massiliensis	0	54	54	54	8.04577e-32	1.52608e-31
GH85	Strep. mutans	0	54	54	54	8.04577e-32	1.52608e-31
GH85	Strep. salivarius	0	54	54	54	8.04577e-32	1.52608e-31
GH85	Strep. sanguinis	0	54	54	54	8.04577e-32	1.52608e-31
GH85	Strep. sinensis	0	54	54	54	8.04577e-32	1.52608e-31
GH85	Strep. sp001556435	0	54	54	54	8.04577e-32	1.52608e-31
GH85	Strep. sp901875575	0	54	54	54	8.04577e-32	1.52608e-31
GH85	Strep. vestibularis	0	54	54	54	8.04577e-32	1.52608e-31
GH85	Strep.BHI_11	0	54	54	54	8.04577e-32	1.52608e-31
GH85	Strep.BHI_2	0	54	54	54	8.04577e-32	1.52608e-31
GH85	Strep.BHI_8	0	54	54	54	8.04577e-32	1.52608e-31
GT8	Strep. gordonii	6	70	64	64	1.03713e-31	1.96195e-31
GT8	Strep. hominis	6	70	64	64	1.03713e-31	1.96195e-31
GT8	Strep. mitis	6	70	64	64	1.03713e-31	1.96195e-31
GT8	Strep. parasanguinis	6	70	64	64	1.03713e-31	1.96195e-31
GT8	Strep. salivarius	6	70	64	64	1.03713e-31	1.96195e-31
GH13_12	Strep. infantis	3	62	59	59	2.2365e-31	4.22859e-31
AA10	Strep. infantis	8	74	66	66	2.41345e-31	4.56073e-31
CBM32	Strep. anginosus	1	56	55	55	2.91866e-31	5.43475e-31
CBM32	Strep. caecimuris	1	56	55	55	2.91866e-31	5.43475e-31
CBM32	Strep. cristatus	1	56	55	55	2.91866e-31	5.43475e-31
CBM32	Strep. pseudopneumoniae	1	56	55	55	2.91866e-31	5.43475e-31
CBM32	Strep. rubneri	1	56	55	55	2.91866e-31	5.43475e-31
CBM32	Strep. sinensis	1	56	55	55	2.91866e-31	5.43475e-31
CBM32	Strep. sp001813105	1	56	55	55	2.91866e-31	5.43475e-31
CBM32	Strep. sp002238115	1	56	55	55	2.91866e-31	5.43475e-31
CBM32	Strep. sp013394695	1	56	55	55	2.91866e-31	5.43475e-31
CBM32	Strep. sp029691405	1	56	55	55	2.91866e-31	5.43475e-31
CBM32	Strep.BHI_1	1	56	55	55	2.91866e-31	5.43475e-31
CBM32	Strep.BHI_10	1	56	55	55	2.91866e-31	5.43475e-31
CBM32	Strep.BHI_3	1	56	55	55	2.91866e-31	5.43475e-31
CBM32	Strep.BHI_4	1	56	55	55	2.91866e-31	5.43475e-31
CBM32	Strep.BHI_5	1	56	55	55	2.91866e-31	5.43475e-31
CBM32	Strep.BHI_6	1	56	55	55	2.91866e-31	5.43475e-31
CBM32	Strep.BHI_7	1	56	55	55	2.91866e-31	5.43475e-31
CBM32	Strep.BHI_9	1	56	55	55	2.91866e-31	5.43475e-31
GH36	Strep. caecimuris	1	56	55	55	2.91866e-31	5.43475e-31
GH36	Strep. cristatus	1	56	55	55	2.91866e-31	5.43475e-31
GH36	Strep. mutans	1	56	55	55	2.91866e-31	5.43475e-31
GH36	Strep. rubneri	1	56	55	55	2.91866e-31	5.43475e-31
GH36	Strep. sinensis	1	56	55	55	2.91866e-31	5.43475e-31
GH36	Strep. sp001556435	1	56	55	55	2.91866e-31	5.43475e-31
GH36	Strep. sp001813105	1	56	55	55	2.91866e-31	5.43475e-31
GH36	Strep.BHI_10	1	56	55	55	2.91866e-31	5.43475e-31
GH36	Strep.BHI_11	1	56	55	55	2.91866e-31	5.43475e-31
GH36	Strep.BHI_4	1	56	55	55	2.91866e-31	5.43475e-31
CBM34	Strep. gordonii	6	68	62	62	1.373e-30	2.55129e-30
GH13_20	Strep. gordonii	6	68	62	62	1.373e-30	2.55129e-30
GH20	Strep. gordonii	6	68	62	62	1.373e-30	2.55129e-30
GH29	Strep. gordonii	6	68	62	62	1.373e-30	2.55129e-30
GH13_29	Strep. constellatus	4	63	59	59	1.66888e-30	3.09464e-30
GH13_29	Strep. oralis	4	63	59	59	1.66888e-30	3.09464e-30
GT1	Strep. constellatus	4	63	59	59	1.66888e-30	3.09464e-30
GT1	Strep. mitis	4	63	59	59	1.66888e-30	3.09464e-30
GT8	Strep. anginosus	7	70	63	63	1.92175e-30	3.56168e-30
AA10	Strep. parasanguinis	9	74	65	65	3.21635e-30	5.95794e-30
GH85	Strep. caecimuris	1	54	53	53	4.42517e-30	8.12954e-30
GH85	Strep. cristatus	1	54	53	53	4.42517e-30	8.12954e-30
GH85	Strep. pseudopneumoniae	1	54	53	53	4.42517e-30	8.12954e-30
GH85	Strep. rubneri	1	54	53	53	4.42517e-30	8.12954e-30
GH85	Strep. sp001813105	1	54	53	53	4.42517e-30	8.12954e-30
GH85	Strep. sp002238115	1	54	53	53	4.42517e-30	8.12954e-30
GH85	Strep. sp013394695	1	54	53	53	4.42517e-30	8.12954e-30
GH85	Strep. sp029691405	1	54	53	53	4.42517e-30	8.12954e-30
GH85	Strep.BHI_1	1	54	53	53	4.42517e-30	8.12954e-30
GH85	Strep.BHI_10	1	54	53	53	4.42517e-30	8.12954e-30
GH85	Strep.BHI_3	1	54	53	53	4.42517e-30	8.12954e-30
GH85	Strep.BHI_4	1	54	53	53	4.42517e-30	8.12954e-30
GH85	Strep.BHI_5	1	54	53	53	4.42517e-30	8.12954e-30
GH85	Strep.BHI_6	1	54	53	53	4.42517e-30	8.12954e-30
GH85	Strep.BHI_7	1	54	53	53	4.42517e-30	8.12954e-30
GH85	Strep.BHI_9	1	54	53	53	4.42517e-30	8.12954e-30
GH13_3	Strep. infantis	8	71	63	63	1.09258e-29	2.00513e-29
GH13_3	Strep. oralis	8	71	63	63	1.09258e-29	2.00513e-29
GH0	Strep. mitis	14	83	69	69	1.53054e-29	2.80744e-29
CBM32	Strep. xiaochunlingii	2	56	54	54	1.59247e-29	2.91653e-29
GH36	Strep. sanguinis	2	56	54	54	1.59247e-29	2.91653e-29
GH36	Strep.BHI_8	2	56	54	54	1.59247e-29	2.91653e-29
CBM34	Strep. oralis	7	68	61	61	2.46377e-29	4.50533e-29
GH13_20	Strep. oralis	7	68	61	61	2.46377e-29	4.50533e-29
GH20	Strep. parasanguinis	7	68	61	61	2.46377e-29	4.50533e-29
GT0	Strep. mitis	14	82	68	68	5.12666e-29	9.36996e-29
GH125	Strep. gordonii	6	65	59	59	6.54337e-29	1.19531e-28
GH13_3	Strep. parasanguinis	9	71	62	62	1.3792e-28	2.51816e-28
GH85	Strep. xiaochunlingii	2	54	52	52	2.32605e-28	4.24477e-28
CBM71	Strep. gordonii	6	64	58	58	2.36521e-28	4.31182e-28
CBM71	Strep. parasanguinis	6	64	58	58	2.36521e-28	4.31182e-28
GH95	Strep. anginosus	0	48	48	48	3.10797e-28	5.6142e-28
GH95	Strep. caecimuris	0	48	48	48	3.10797e-28	5.6142e-28
GH95	Strep. constellatus	0	48	48	48	3.10797e-28	5.6142e-28
GH95	Strep. cristatus	0	48	48	48	3.10797e-28	5.6142e-28
GH95	Strep. gordonii	0	48	48	48	3.10797e-28	5.6142e-28
GH95	Strep. hominis	0	48	48	48	3.10797e-28	5.6142e-28
GH95	Strep. massiliensis	0	48	48	48	3.10797e-28	5.6142e-28
GH95	Strep. mutans	0	48	48	48	3.10797e-28	5.6142e-28
GH95	Strep. parasanguinis	0	48	48	48	3.10797e-28	5.6142e-28
GH95	Strep. pseudopneumoniae	0	48	48	48	3.10797e-28	5.6142e-28
GH95	Strep. salivarius	0	48	48	48	3.10797e-28	5.6142e-28
GH95	Strep. sanguinis	0	48	48	48	3.10797e-28	5.6142e-28
GH95	Strep. sinensis	0	48	48	48	3.10797e-28	5.6142e-28
GH95	Strep. sp001556435	0	48	48	48	3.10797e-28	5.6142e-28
GH95	Strep. sp001813105	0	48	48	48	3.10797e-28	5.6142e-28
GH95	Strep. sp901875575	0	48	48	48	3.10797e-28	5.6142e-28
GH95	Strep. vestibularis	0	48	48	48	3.10797e-28	5.6142e-28
GH95	Strep.BHI_11	0	48	48	48	3.10797e-28	5.6142e-28
CBM34	Strep. infantis	8	68	60	60	4.87573e-28	8.78074e-28
GH13_20	Strep. infantis	8	68	60	60	4.87573e-28	8.78074e-28
GH20	Strep. infantis	8	68	60	60	4.87573e-28	8.78074e-28
GH20	Strep. oralis	8	68	60	60	4.87573e-28	8.78074e-28
GH29	Strep. infantis	8	68	60	60	4.87573e-28	8.78074e-28
GH29	Strep. oralis	8	68	60	60	4.87573e-28	8.78074e-28
AA10	Strep. mitis	11	74	63	63	6.36841e-28	1.14631e-27
GH13_29	Strep. gordonii	6	63	57	57	8.5359e-28	1.53259e-27
GH13_29	Strep. hominis	6	63	57	57	8.5359e-28	1.53259e-27
GH13_29	Strep. salivarius	6	63	57	57	8.5359e-28	1.53259e-27
GT1	Strep. gordonii	6	63	57	57	8.5359e-28	1.53259e-27
GT1	Strep. hominis	6	63	57	57	8.5359e-28	1.53259e-27
GH125	Strep. parasanguinis	7	65	58	58	1.11668e-27	2.00395e-27
GH130	Strep. cristatus	0	47	47	47	1.23024e-27	2.18464e-27
GH130	Strep. infantis	0	47	47	47	1.23024e-27	2.18464e-27
GH130	Strep. mutans	0	47	47	47	1.23024e-27	2.18464e-27
GH130	Strep. oralis	0	47	47	47	1.23024e-27	2.18464e-27
GH130	Strep. pseudopneumoniae	0	47	47	47	1.23024e-27	2.18464e-27
GH130	Strep. salivarius	0	47	47	47	1.23024e-27	2.18464e-27
GH130	Strep. sinensis	0	47	47	47	1.23024e-27	2.18464e-27
GH130	Strep. sp001556435	0	47	47	47	1.23024e-27	2.18464e-27
GH130	Strep. sp002238115	0	47	47	47	1.23024e-27	2.18464e-27
GH130	Strep. sp013394695	0	47	47	47	1.23024e-27	2.18464e-27
GH130	Strep. sp029691405	0	47	47	47	1.23024e-27	2.18464e-27
GH130	Strep. sp901875575	0	47	47	47	1.23024e-27	2.18464e-27
[truncated: 1,566 more rows]
