# Supplementary material for: The Genomic Landscape of Head and Neck Cancer-associated Streptococci
Source: Research Square preprint supplement (doi:10.21203/rs.3.rs-8400357/v1), 2026-01-09
Supplement: Supplementary file 8 [file bbca652d729f4ec9e2b58e7d.xlsx]

## Sheet: gene_freq_location
Supplementary Table 1: Fisher’s exact test gene enrichment
Gene	Other name	P_Value	Contingency				P_Adjusted
aIM24	TIGR00266 family protein;AIM24 protein required for mitochondrial respiration	0.00261283	c(6	64	11	20)	0.0287411
group_16421	YtxH-like protein;Gram-positive signal peptide protein YSIRK family	0.00322925	c(9	73	8	11)	0.0355217
group_2826	N-acetyltransferase domain-containing protein;GNAT family acetyltransferase	0.00325503	c(10	76	7	8)	0.0358053
yetF	Membrane protein yetF;DUF421 domain-containing protein;hypothetical protein;Putative membrane protein yetF	0.00475247	c(6	61	11	23)	0.0522772
group_1767	DUF3290 domain-containing protein	0.00475247	c(6	61	11	23)	0.0522772
group_2725	Uncharacterized membrane protein;DUF1304 domain-containing protein;Integral membrane protein;Epimerase;PF06993 family protein	0.0074274	c(10	20	7	64)	0.0817014
group_338	CsbD-like domain-containing protein	0.00987984	c(6	60	11	24)	0.108678
group_1388	Two pore domain potassium channel family protein	0.0256662	c(2	36	15	48)	0.282328
marR~~~mgrA		0.026744	c(11	28	6	56)	0.294184
group_19558	cadX, Cd(II)/Zn(II)-sensing metalloregulatory transcriptional regulator CadX	0.0290724	c(6	55	11	29)	0.319797
treC	alphaalpha-phosphotrehalase	0.0313457	c(13	38	4	46)	0.344803

## Sheet: gene_fre_species
Supplementary Table 2: Gene frequency differences between tumour and oral isolates
Gene	Tumour_Freq	Oral_Cavity_Freq	Freq_Diff	P_Value	P_Adjusted	Species
rpsJ	1	1	0	NA	NA	Strep. parasanguinis
rplX	1	1	0	NA	NA	Strep. parasanguinis
rplC	1	1	0	NA	NA	Strep. parasanguinis
rpmD	1	1	0	NA	NA	Strep. parasanguinis
rplN	1	1	0	NA	NA	Strep. parasanguinis
rplE	1	1	0	NA	NA	Strep. parasanguinis
rpsE	1	1	0	NA	NA	Strep. parasanguinis
rplD	1	1	0	NA	NA	Strep. parasanguinis
secY	1	1	0	NA	NA	Strep. parasanguinis
rpoA	1	1	0	NA	NA	Strep. parasanguinis
rplO	1	1	0	NA	NA	Strep. parasanguinis
rpsQ	1	1	0	NA	NA	Strep. parasanguinis
rpsH	1	1	0	NA	NA	Strep. parasanguinis
rplR	1	1	0	NA	NA	Strep. parasanguinis
rplW	1	1	0	NA	NA	Strep. parasanguinis
group_20010	1	1	0	NA	NA	Strep. parasanguinis
rpsK	1	1	0	NA	NA	Strep. parasanguinis
rpmC	1	1	0	NA	NA	Strep. parasanguinis
rpsC	1	1	0	NA	NA	Strep. parasanguinis
rplP	1	1	0	NA	NA	Strep. parasanguinis
rplF	1	1	0	NA	NA	Strep. parasanguinis
rplB	1	1	0	NA	NA	Strep. parasanguinis
rplV	1	1	0	NA	NA	Strep. parasanguinis
infA	1	1	0	NA	NA	Strep. parasanguinis
rpsM	1	1	0	NA	NA	Strep. parasanguinis
rpsS	1	1	0	NA	NA	Strep. parasanguinis
rpmJ	1	1	0	NA	NA	Strep. parasanguinis
gpsA	1	1	0	NA	NA	Strep. parasanguinis
galU	1	1	0	NA	NA	Strep. parasanguinis
group_21513	1	1	0	NA	NA	Strep. parasanguinis
yloV~~~dhaL	1	1	0	NA	NA	Strep. parasanguinis
group_20512	1	1	0	NA	NA	Strep. parasanguinis
group_20077	1	1	0	NA	NA	Strep. parasanguinis
group_19991	1	1	0	NA	NA	Strep. parasanguinis
group_19774	1	1	0	NA	NA	Strep. parasanguinis
group_19276	1	1	0	NA	NA	Strep. parasanguinis
group_17956	1	1	0	NA	NA	Strep. parasanguinis
purA	1	1	0	NA	NA	Strep. parasanguinis
murE~~~murT	1	1	0	NA	NA	Strep. parasanguinis
ptsH	1	1	0	NA	NA	Strep. parasanguinis
ptsI~~~ptsP	1	1	0	NA	NA	Strep. parasanguinis
cobQ~~~gatD	1	1	0	NA	NA	Strep. parasanguinis
nagE~~~exp5	1	1	0	NA	NA	Strep. parasanguinis
tsf~~~tnpB	1	1	0	NA	NA	Strep. parasanguinis
rpsB	1	1	0	NA	NA	Strep. parasanguinis
cmk	1	1	0	NA	NA	Strep. parasanguinis
ompR~~~graR	1	1	0	NA	NA	Strep. parasanguinis
tsaD	1	1	0	NA	NA	Strep. parasanguinis
endA	1	1	0	NA	NA	Strep. parasanguinis
manA	1	1	0	NA	NA	Strep. parasanguinis
rpoY	1	1	0	NA	NA	Strep. parasanguinis
rlmB~~~trmH	1	1	0	NA	NA	Strep. parasanguinis
murA	1	1	0	NA	NA	Strep. parasanguinis
fba	1	1	0	NA	NA	Strep. parasanguinis
rarA	1	1	0	NA	NA	Strep. parasanguinis
purC	1	1	0	NA	NA	Strep. parasanguinis
purL2	1	1	0	NA	NA	Strep. parasanguinis
purM	1	1	0	NA	NA	Strep. parasanguinis
purN	1	1	0	NA	NA	Strep. parasanguinis
purH	1	1	0	NA	NA	Strep. parasanguinis
citB~~~luxR~~~degU	1	1	0	NA	NA	Strep. parasanguinis
atpA	1	1	0	NA	NA	Strep. parasanguinis
atpG	1	1	0	NA	NA	Strep. parasanguinis
rplJ	1	1	0	NA	NA	Strep. parasanguinis
rplL	1	1	0	NA	NA	Strep. parasanguinis
atpD	1	1	0	NA	NA	Strep. parasanguinis
atpC	1	1	0	NA	NA	Strep. parasanguinis
tadA	1	1	0	NA	NA	Strep. parasanguinis
clpA~~~clpC	1	1	0	NA	NA	Strep. parasanguinis
ctsR	1	1	0	NA	NA	Strep. parasanguinis
aspB	1	1	0	NA	NA	Strep. parasanguinis
plsX	1	1	0	NA	NA	Strep. parasanguinis
group_2303	1	1	0	NA	NA	Strep. parasanguinis
group_20927	1	1	0	NA	NA	Strep. parasanguinis
purD	1	1	0	NA	NA	Strep. parasanguinis
purK	1	1	0	NA	NA	Strep. parasanguinis
group_2992	1	1	0	NA	NA	Strep. parasanguinis
uvrC	1	1	0	NA	NA	Strep. parasanguinis
spx	1	1	0	NA	NA	Strep. parasanguinis
group_2862	1	1	0	NA	NA	Strep. parasanguinis
aCT	1	1	0	NA	NA	Strep. parasanguinis
trmN6	1	1	0	NA	NA	Strep. parasanguinis
group_2810	1	1	0	NA	NA	Strep. parasanguinis
rnc	1	1	0	NA	NA	Strep. parasanguinis
cshA~~~srmB	1	1	0	NA	NA	Strep. parasanguinis
tlyC	1	1	0	NA	NA	Strep. parasanguinis
ynzC	1	1	0	NA	NA	Strep. parasanguinis
group_2656	1	1	0	NA	NA	Strep. parasanguinis
glyQ	1	1	0	NA	NA	Strep. parasanguinis
abcf	1	1	0	NA	NA	Strep. parasanguinis
phnP~~~walJ	1	1	0	NA	NA	Strep. parasanguinis
vicK~~~walK	1	1	0	NA	NA	Strep. parasanguinis
yycF	1	1	0	NA	NA	Strep. parasanguinis
norM~~~mepA	1	1	0	NA	NA	Strep. parasanguinis
thrC	1	1	0	NA	NA	Strep. parasanguinis
metL1	1	1	0	NA	NA	Strep. parasanguinis
group_2541	1	1	0	NA	NA	Strep. parasanguinis
group_2539	1	1	0	NA	NA	Strep. parasanguinis
ybbA	1	1	0	NA	NA	Strep. parasanguinis
caiD~~~fabM	1	1	0	NA	NA	Strep. parasanguinis
marR~~~fabT	1	1	0	NA	NA	Strep. parasanguinis
nupQ~~~plsY	1	1	0	NA	NA	Strep. parasanguinis
group_2508	1	1	0	NA	NA	Strep. parasanguinis
group_2448	1	1	0	NA	NA	Strep. parasanguinis
cdd	1	1	0	NA	NA	Strep. parasanguinis
deoC	1	1	0	NA	NA	Strep. parasanguinis
pdp	1	1	0	NA	NA	Strep. parasanguinis
fabK	1	1	0	NA	NA	Strep. parasanguinis
group_2410	1	1	0	NA	NA	Strep. parasanguinis
group_2409	1	1	0	NA	NA	Strep. parasanguinis
rsmC	1	1	0	NA	NA	Strep. parasanguinis
pptA	1	1	0	NA	NA	Strep. parasanguinis
rpsT	1	1	0	NA	NA	Strep. parasanguinis
xth~~~exoA~~~xthA	1	1	0	NA	NA	Strep. parasanguinis
fabF	1	1	0	NA	NA	Strep. parasanguinis
accB	1	1	0	NA	NA	Strep. parasanguinis
scaA~~~pepO	1	1	0	NA	NA	Strep. parasanguinis
prfC	1	1	0	NA	NA	Strep. parasanguinis
group_2155	1	1	0	NA	NA	Strep. parasanguinis
ruvB	1	1	0	NA	NA	Strep. parasanguinis
fabZ	1	1	0	NA	NA	Strep. parasanguinis
group_2136	1	1	0	NA	NA	Strep. parasanguinis
xapA	1	1	0	NA	NA	Strep. parasanguinis
rpiA	1	1	0	NA	NA	Strep. parasanguinis
deoD	1	1	0	NA	NA	Strep. parasanguinis
cysE~~~epsC~~~rimI	1	1	0	NA	NA	Strep. parasanguinis
group_2039	1	1	0	NA	NA	Strep. parasanguinis
pyrD~~~pyrDA	1	1	0	NA	NA	Strep. parasanguinis
corA	1	1	0	NA	NA	Strep. parasanguinis
yqeH	1	1	0	NA	NA	Strep. parasanguinis
accA	1	1	0	NA	NA	Strep. parasanguinis
ruvA	1	1	0	NA	NA	Strep. parasanguinis
cysS	1	1	0	NA	NA	Strep. parasanguinis
yhbY	1	1	0	NA	NA	Strep. parasanguinis
mrnC	1	1	0	NA	NA	Strep. parasanguinis
cinA	1	1	0	NA	NA	Strep. parasanguinis
recA	1	1	0	NA	NA	Strep. parasanguinis
group_1585	1	1	0	NA	NA	Strep. parasanguinis
yqeK	1	1	0	NA	NA	Strep. parasanguinis
nadD	1	1	0	NA	NA	Strep. parasanguinis
rsfS	1	1	0	NA	NA	Strep. parasanguinis
gpmA	1	1	0	NA	NA	Strep. parasanguinis
tmcAL	1	1	0	NA	NA	Strep. parasanguinis
ubiG~~~ubiE	1	1	0	NA	NA	Strep. parasanguinis
rplI	1	1	0	NA	NA	Strep. parasanguinis
group_1152	1	1	0	NA	NA	Strep. parasanguinis
group_1146	1	1	0	NA	NA	Strep. parasanguinis
mnmA	1	1	0	NA	NA	Strep. parasanguinis
mnmG	1	1	0	NA	NA	Strep. parasanguinis
tpiA	1	1	0	NA	NA	Strep. parasanguinis
group_20876	1	1	0	NA	NA	Strep. parasanguinis
yazA~~~yhbQ	1	0.875	0.125	1	1	Strep. parasanguinis
group_2787	1	1	0	NA	NA	Strep. parasanguinis
brnQ	1	1	0	NA	NA	Strep. parasanguinis
group_2704	1	1	0	NA	NA	Strep. parasanguinis
pflA	1	1	0	NA	NA	Strep. parasanguinis
lpd	1	1	0	NA	NA	Strep. parasanguinis
xerS~~~xerC	1	1	0	NA	NA	Strep. parasanguinis
fhs~~~fhs2	1	1	0	NA	NA	Strep. parasanguinis
mutL	1	1	0	NA	NA	Strep. parasanguinis
accD	1	1	0	NA	NA	Strep. parasanguinis
manB	1	1	0	NA	NA	Strep. parasanguinis
rlmD~~~trmA~~~rumA	1	1	0	NA	NA	Strep. parasanguinis
asd	1	1	0	NA	NA	Strep. parasanguinis
rpsD	1	1	0	NA	NA	Strep. parasanguinis
purB	1	1	0	NA	NA	Strep. parasanguinis
group_3131	1	1	0	NA	NA	Strep. parasanguinis
dapD	1	1	0	NA	NA	Strep. parasanguinis
ciaH~~~baeS	1	1	0	NA	NA	Strep. parasanguinis
ompR~~~ciaR	1	1	0	NA	NA	Strep. parasanguinis
group_2974	1	1	0	NA	NA	Strep. parasanguinis
pepV	1	1	0	NA	NA	Strep. parasanguinis
hup~~~himA	1	1	0	NA	NA	Strep. parasanguinis
mdtK~~~norM~~~pdrM	1	1	0	NA	NA	Strep. parasanguinis
yohK~~~lrgB	0	0.625	0.625	0.444444	1	Strep. parasanguinis
xpt~~~apt	1	1	0	NA	NA	Strep. parasanguinis
group_21114	1	1	0	NA	NA	Strep. parasanguinis
ssbA~~~ssb	1	1	0	NA	NA	Strep. parasanguinis
group_17652	1	1	0	NA	NA	Strep. parasanguinis
rpe	1	1	0	NA	NA	Strep. parasanguinis
yhaM	1	1	0	NA	NA	Strep. parasanguinis
rmuC	1	1	0	NA	NA	Strep. parasanguinis
rsgA	1	1	0	NA	NA	Strep. parasanguinis
yxjI	1	1	0	NA	NA	Strep. parasanguinis
potE	1	1	0	NA	NA	Strep. parasanguinis
dapA	1	1	0	NA	NA	Strep. parasanguinis
group_21447	1	1	0	NA	NA	Strep. parasanguinis
group_21374	1	1	0	NA	NA	Strep. parasanguinis
group_19979	1	1	0	NA	NA	Strep. parasanguinis
group_18452	1	1	0	NA	NA	Strep. parasanguinis
group_17755	1	1	0	NA	NA	Strep. parasanguinis
group_16627	1	1	0	NA	NA	Strep. parasanguinis
group_6972	1	1	0	NA	NA	Strep. parasanguinis
group_3029	1	1	0	NA	NA	Strep. parasanguinis
nrdF	1	1	0	NA	NA	Strep. parasanguinis
group_2993	1	1	0	NA	NA	Strep. parasanguinis
htpX	1	1	0	NA	NA	Strep. parasanguinis
group_2970	1	1	0	NA	NA	Strep. parasanguinis
ldh~~~mdh	1	1	0	NA	NA	Strep. parasanguinis
miaA	1	1	0	NA	NA	Strep. parasanguinis
nrdH	1	1	0	NA	NA	Strep. parasanguinis
arlR~~~csrR~~~ompR	1	1	0	NA	NA	Strep. parasanguinis
gndA	1	1	0	NA	NA	Strep. parasanguinis
rnz	1	1	0	NA	NA	Strep. parasanguinis
yqjQ	1	1	0	NA	NA	Strep. parasanguinis
group_2859	1	1	0	NA	NA	Strep. parasanguinis
glmU	1	1	0	NA	NA	Strep. parasanguinis
group_2799	1	1	0	NA	NA	Strep. parasanguinis
mtnN	1	1	0	NA	NA	Strep. parasanguinis
rsmA	1	1	0	NA	NA	Strep. parasanguinis
khpA	1	1	0	NA	NA	Strep. parasanguinis
rpsP	1	1	0	NA	NA	Strep. parasanguinis
ideR~~~mntR~~~scaR~~~marR	1	1	0	NA	NA	Strep. parasanguinis
dnaD	1	1	0	NA	NA	Strep. parasanguinis
glgA	1	1	0	NA	NA	Strep. parasanguinis
glgD	1	1	0	NA	NA	Strep. parasanguinis
glgC	1	1	0	NA	NA	Strep. parasanguinis
glgB	1	1	0	NA	NA	Strep. parasanguinis
tsaB	1	1	0	NA	NA	Strep. parasanguinis
hisS	1	1	0	NA	NA	Strep. parasanguinis
amiF~~~oppF	1	1	0	NA	NA	Strep. parasanguinis
oppD~~~amiE	1	1	0	NA	NA	Strep. parasanguinis
oppC	1	1	0	NA	NA	Strep. parasanguinis
oppB~~~gsiC~~~amiC	1	1	0	NA	NA	Strep. parasanguinis
sarA~~~aliA~~~aliB~~~oppA	1	1	0	NA	NA	Strep. parasanguinis
prmA	1	1	0	NA	NA	Strep. parasanguinis
rsmE	1	1	0	NA	NA	Strep. parasanguinis
group_2192	1	1	0	NA	NA	Strep. parasanguinis
mscL	1	1	0	NA	NA	Strep. parasanguinis
tgt	1	1	0	NA	NA	Strep. parasanguinis
rplK	1	1	0	NA	NA	Strep. parasanguinis
rplA	1	1	0	NA	NA	Strep. parasanguinis
hflC~~~hflK~~~ybbK	1	1	0	NA	NA	Strep. parasanguinis
hrcA~~~deoR	1	1	0	NA	NA	Strep. parasanguinis
grpE	1	1	0	NA	NA	Strep. parasanguinis
dnaK	1	1	0	NA	NA	Strep. parasanguinis
nifU~~~iscU	1	1	0	NA	NA	Strep. parasanguinis
sufS	1	1	0	NA	NA	Strep. parasanguinis
sufD	1	1	0	NA	NA	Strep. parasanguinis
sufC	1	1	0	NA	NA	Strep. parasanguinis
atpF	1	1	0	NA	NA	Strep. parasanguinis
group_534	1	1	0	NA	NA	Strep. parasanguinis
fabG	1	1	0	NA	NA	Strep. parasanguinis
atpB	1	1	0	NA	NA	Strep. parasanguinis
uppP	1	1	0	NA	NA	Strep. parasanguinis
group_287	1	1	0	NA	NA	Strep. parasanguinis
group_19698	1	1	0	NA	NA	Strep. parasanguinis
group_3003	1	0.875	0.125	1	1	Strep. parasanguinis
group_2967	1	1	0	NA	NA	Strep. parasanguinis
pyk	1	1	0	NA	NA	Strep. parasanguinis
pfkA	1	1	0	NA	NA	Strep. parasanguinis
group_2943	1	1	0	NA	NA	Strep. parasanguinis
group_2912	1	1	0	NA	NA	Strep. parasanguinis
group_2894	1	1	0	NA	NA	Strep. parasanguinis
group_2888	1	1	0	NA	NA	Strep. parasanguinis
group_2742	1	1	0	NA	NA	Strep. parasanguinis
tatD~~~ycfH	1	1	0	NA	NA	Strep. parasanguinis
apt	1	1	0	NA	NA	Strep. parasanguinis
rqcH~~~fbp62~~~fbpA~~~pavA	1	1	0	NA	NA	Strep. parasanguinis
hslO	1	1	0	NA	NA	Strep. parasanguinis
dusB	1	1	0	NA	NA	Strep. parasanguinis
azlD	1	1	0	NA	NA	Strep. parasanguinis
pta	1	1	0	NA	NA	Strep. parasanguinis
group_2549	1	1	0	NA	NA	Strep. parasanguinis
nadK	1	1	0	NA	NA	Strep. parasanguinis
group_2430	1	1	0	NA	NA	Strep. parasanguinis
prs~~~prs2	1	1	0	NA	NA	Strep. parasanguinis
group_2391	1	1	0	NA	NA	Strep. parasanguinis
alr~~~acpS	1	1	0	NA	NA	Strep. parasanguinis
lacI~~~purR	1	1	0	NA	NA	Strep. parasanguinis
group_2343	1	1	0	NA	NA	Strep. parasanguinis
pbuX	1	1	0	NA	NA	Strep. parasanguinis
sacC	1	1	0	NA	NA	Strep. parasanguinis
efp	1	1	0	NA	NA	Strep. parasanguinis
aroG1	1	1	0	NA	NA	Strep. parasanguinis
yloU	1	1	0	NA	NA	Strep. parasanguinis
nusB	1	1	0	NA	NA	Strep. parasanguinis
group_2193	1	1	0	NA	NA	Strep. parasanguinis
radA	1	1	0	NA	NA	Strep. parasanguinis
dut	1	1	0	NA	NA	Strep. parasanguinis
yjbM	1	1	0	NA	NA	Strep. parasanguinis
radC	1	1	0	NA	NA	Strep. parasanguinis
recO	1	1	0	NA	NA	Strep. parasanguinis
group_2308	1	1	0	NA	NA	Strep. parasanguinis
group_2298	1	1	0	NA	NA	Strep. parasanguinis
purR	1	1	0	NA	NA	Strep. parasanguinis
group_20360	1	1	0	NA	NA	Strep. parasanguinis
group_19754	1	1	0	NA	NA	Strep. parasanguinis
group_18735	1	1	0	NA	NA	Strep. parasanguinis
group_3068	1	1	0	NA	NA	Strep. parasanguinis
asnS	1	1	0	NA	NA	Strep. parasanguinis
thyA	1	1	0	NA	NA	Strep. parasanguinis
group_3043	1	1	0	NA	NA	Strep. parasanguinis
sprT	1	1	0	NA	NA	Strep. parasanguinis
group_2977	1	1	0	NA	NA	Strep. parasanguinis
ireB	1	1	0	NA	NA	Strep. parasanguinis
rpmA	1	1	0	NA	NA	Strep. parasanguinis
group_2952	1	1	0	NA	NA	Strep. parasanguinis
ysxB	1	1	0	NA	NA	Strep. parasanguinis
pyrB	1	1	0	NA	NA	Strep. parasanguinis
yraQ	1	1	0	NA	NA	Strep. parasanguinis
ycgQ	1	1	0	NA	NA	Strep. parasanguinis
pyrR	1	1	0	NA	NA	Strep. parasanguinis
rplU	1	1	0	NA	NA	Strep. parasanguinis
trmD	1	1	0	NA	NA	Strep. parasanguinis
group_2882	1	1	0	NA	NA	Strep. parasanguinis
zwf	1	1	0	NA	NA	Strep. parasanguinis
thiI	1	1	0	NA	NA	Strep. parasanguinis
group_2880	1	1	0	NA	NA	Strep. parasanguinis
ruvX	1	1	0	NA	NA	Strep. parasanguinis
yrzB	1	1	0	NA	NA	Strep. parasanguinis
yjdM~~~phnA	1	1	0	NA	NA	Strep. parasanguinis
group_2855	1	1	0	NA	NA	Strep. parasanguinis
group_2853	1	1	0	NA	NA	Strep. parasanguinis
lspA	1	1	0	NA	NA	Strep. parasanguinis
group_2851	1	1	0	NA	NA	Strep. parasanguinis
group_2841	1	1	0	NA	NA	Strep. parasanguinis
group_2822	1	1	0	NA	NA	Strep. parasanguinis
group_2813	1	1	0	NA	NA	Strep. parasanguinis
group_2811	1	1	0	NA	NA	Strep. parasanguinis
lepA	1	1	0	NA	NA	Strep. parasanguinis
cof~~~ybjI	1	1	0	NA	NA	Strep. parasanguinis
yidA~~~cof	1	1	0	NA	NA	Strep. parasanguinis
ftsY	1	1	0	NA	NA	Strep. parasanguinis
group_2674	1	1	0	NA	NA	Strep. parasanguinis
mraY	1	1	0	NA	NA	Strep. parasanguinis
rsmH~~~mraW	1	1	0	NA	NA	Strep. parasanguinis
group_2638	1	1	0	NA	NA	Strep. parasanguinis
group_2637	1	1	0	NA	NA	Strep. parasanguinis
ilvE	1	1	0	NA	NA	Strep. parasanguinis
group_2625	1	1	0	NA	NA	Strep. parasanguinis
rpsA	1	1	0	NA	NA	Strep. parasanguinis
upp	1	1	0	NA	NA	Strep. parasanguinis
pepP	1	1	0	NA	NA	Strep. parasanguinis
clpP	1	1	0	NA	NA	Strep. parasanguinis
livK	1	1	0	NA	NA	Strep. parasanguinis
gntR~~~yvoA~~~mngR	1	1	0	NA	NA	Strep. parasanguinis
ylxM	1	1	0	NA	NA	Strep. parasanguinis
ffh	1	1	0	NA	NA	Strep. parasanguinis
smpB~~~tehB	1	1	0	NA	NA	Strep. parasanguinis
group_2564	1	1	0	NA	NA	Strep. parasanguinis
livH	1	1	0	NA	NA	Strep. parasanguinis
nrnA	1	1	0	NA	NA	Strep. parasanguinis
livM	1	1	0	NA	NA	Strep. parasanguinis
rpmE~~~rpmE2	1	1	0	NA	NA	Strep. parasanguinis
mltE~~~pmp23	1	1	0	NA	NA	Strep. parasanguinis
ndpA	1	1	0	NA	NA	Strep. parasanguinis
rodA~~~ftsW	1	1	0	NA	NA	Strep. parasanguinis
yajL	1	1	0	NA	NA	Strep. parasanguinis
fldA	1	1	0	NA	NA	Strep. parasanguinis
tVP38	1	1	0	NA	NA	Strep. parasanguinis
group_2506	1	0.75	0.25	1	1	Strep. parasanguinis
group_2497	1	1	0	NA	NA	Strep. parasanguinis
livF	1	1	0	NA	NA	Strep. parasanguinis
argS	1	1	0	NA	NA	Strep. parasanguinis
gyrB	1	1	0	NA	NA	Strep. parasanguinis
perM	1	1	0	NA	NA	Strep. parasanguinis
glyA	1	1	0	NA	NA	Strep. parasanguinis
group_2475	1	1	0	NA	NA	Strep. parasanguinis
ezrA	1	1	0	NA	NA	Strep. parasanguinis
fabH	1	1	0	NA	NA	Strep. parasanguinis
tmpC	1	1	0	NA	NA	Strep. parasanguinis
ccpA~~~lacI	1	1	0	NA	NA	Strep. parasanguinis
tmk	1	1	0	NA	NA	Strep. parasanguinis
yabA	1	1	0	NA	NA	Strep. parasanguinis
group_2372	1	1	0	NA	NA	Strep. parasanguinis
prfA	1	1	0	NA	NA	Strep. parasanguinis
tdk	1	1	0	NA	NA	Strep. parasanguinis
ssaB~~~scaA~~~fimA~~~psaA	1	1	0	NA	NA	Strep. parasanguinis
coaA	1	1	0	NA	NA	Strep. parasanguinis
tig	1	1	0	NA	NA	Strep. parasanguinis
scaB~~~znuB	1	1	0	NA	NA	Strep. parasanguinis
rnhB	1	1	0	NA	NA	Strep. parasanguinis
era	1	1	0	NA	NA	Strep. parasanguinis
group_2253	1	1	0	NA	NA	Strep. parasanguinis
ylqF	1	1	0	NA	NA	Strep. parasanguinis
rsmI	1	1	0	NA	NA	Strep. parasanguinis
yccU	1	1	0	NA	NA	Strep. parasanguinis
sitB~~~fhuC~~~scaC~~~znuC	1	1	0	NA	NA	Strep. parasanguinis
dgkA	1	1	0	NA	NA	Strep. parasanguinis
msrB~~~msrAB1~~~msrA~~~msrAB	1	1	0	NA	NA	Strep. parasanguinis
yqeG	1	1	0	NA	NA	Strep. parasanguinis
mnmE	1	1	0	NA	NA	Strep. parasanguinis
nagC	1	1	0	NA	NA	Strep. parasanguinis
metG	1	1	0	NA	NA	Strep. parasanguinis
bceB~~~yxdM	1	1	0	NA	NA	Strep. parasanguinis
ybeY	1	1	0	NA	NA	Strep. parasanguinis
gdhA	1	1	0	NA	NA	Strep. parasanguinis
pyrE	1	1	0	NA	NA	Strep. parasanguinis
pyrF	1	1	0	NA	NA	Strep. parasanguinis
argE	1	1	0	NA	NA	Strep. parasanguinis
pyrD~~~pyrDB	1	1	0	NA	NA	Strep. parasanguinis
group_1983	1	1	0	NA	NA	Strep. parasanguinis
group_1902	1	1	0	NA	NA	Strep. parasanguinis
serS	1	1	0	NA	NA	Strep. parasanguinis
group_1731	1	1	0	NA	NA	Strep. parasanguinis
recD~~~yrrC	1	1	0	NA	NA	Strep. parasanguinis
tag	1	1	0	NA	NA	Strep. parasanguinis
dinB	1	1	0	NA	NA	Strep. parasanguinis
rnhC	1	1	0	NA	NA	Strep. parasanguinis
zapA	1	1	0	NA	NA	Strep. parasanguinis
mutS2	1	1	0	NA	NA	Strep. parasanguinis
sdaAA	1	1	0	NA	NA	Strep. parasanguinis
sdaAB	1	1	0	NA	NA	Strep. parasanguinis
gdpP	1	1	0	NA	NA	Strep. parasanguinis
rplS	1	1	0	NA	NA	Strep. parasanguinis
group_684	1	1	0	NA	NA	Strep. parasanguinis
group_532	1	1	0	NA	NA	Strep. parasanguinis
group_479	1	1	0	NA	NA	Strep. parasanguinis
group_17053	1	1	0	NA	NA	Strep. parasanguinis
pgi	1	1	0	NA	NA	Strep. parasanguinis
cls	1	1	0	NA	NA	Strep. parasanguinis
yhbU~~~rlhA	1	1	0	NA	NA	Strep. parasanguinis
rlhA	1	1	0	NA	NA	Strep. parasanguinis
truB	1	1	0	NA	NA	Strep. parasanguinis
group_2950	1	1	0	NA	NA	Strep. parasanguinis
pepT	1	1	0	NA	NA	Strep. parasanguinis
lysS	1	1	0	NA	NA	Strep. parasanguinis
patB~~~malY	1	1	0	NA	NA	Strep. parasanguinis
ytgP~~~spoVB	1	1	0	NA	NA	Strep. parasanguinis
murE	1	1	0	NA	NA	Strep. parasanguinis
ebsC	1	1	0	NA	NA	Strep. parasanguinis
group_2765	1	1	0	NA	NA	Strep. parasanguinis
ccdA2~~~ccdA	1	1	0	NA	NA	Strep. parasanguinis
group_2749	1	1	0	NA	NA	Strep. parasanguinis
ppaC~~~pPX1	1	1	0	NA	NA	Strep. parasanguinis
yigL~~~cof	1	1	0	NA	NA	Strep. parasanguinis
plsY	1	1	0	NA	NA	Strep. parasanguinis
pbuO~~~nCS2	1	1	0	NA	NA	Strep. parasanguinis
tsaE	1	1	0	NA	NA	Strep. parasanguinis
nox	1	1	0	NA	NA	Strep. parasanguinis
ant6	1	1	0	NA	NA	Strep. parasanguinis
guaA	1	1	0	NA	NA	Strep. parasanguinis
livG	1	1	0	NA	NA	Strep. parasanguinis
rnjA	1	1	0	NA	NA	Strep. parasanguinis
rlmI	1	1	0	NA	NA	Strep. parasanguinis
truA	1	1	0	NA	NA	Strep. parasanguinis
aroD	1	1	0	NA	NA	Strep. parasanguinis
acuB~~~cBS	1	1	0	NA	NA	Strep. parasanguinis
mutM	1	1	0	NA	NA	Strep. parasanguinis
aroB~~~aroE	1	1	0	NA	NA	Strep. parasanguinis
aroC	1	1	0	NA	NA	Strep. parasanguinis
tyrA	1	1	0	NA	NA	Strep. parasanguinis
ylbF	1	1	0	NA	NA	Strep. parasanguinis
divIVA	1	1	0	NA	NA	Strep. parasanguinis
nth	1	1	0	NA	NA	Strep. parasanguinis
group_2244	1	1	0	NA	NA	Strep. parasanguinis
coaC	1	1	0	NA	NA	Strep. parasanguinis
yfkJ~~~wzb	1	1	0	NA	NA	Strep. parasanguinis
group_2104	1	1	0	NA	NA	Strep. parasanguinis
mutY	1	1	0	NA	NA	Strep. parasanguinis
group_1944	1	1	0	NA	NA	Strep. parasanguinis
malK	1	1	0	NA	NA	Strep. parasanguinis
gloB	1	1	0	NA	NA	Strep. parasanguinis
tACO1	1	1	0	NA	NA	Strep. parasanguinis
group_739	1	1	0	NA	NA	Strep. parasanguinis
udk	1	1	0	NA	NA	Strep. parasanguinis
cshA~~~srmB~~~yfmL	1	1	0	NA	NA	Strep. parasanguinis
group_2914	1	1	0	NA	NA	Strep. parasanguinis
group_2872	1	1	0	NA	NA	Strep. parasanguinis
nagA	1	1	0	NA	NA	Strep. parasanguinis
mscS~~~ykuT	1	1	0	NA	NA	Strep. parasanguinis
cwlO	1	1	0	NA	NA	Strep. parasanguinis
group_1335	1	1	0	NA	NA	Strep. parasanguinis
glnQ~~~artM	1	1	0	NA	NA	Strep. parasanguinis
group_19335	1	1	0	NA	NA	Strep. parasanguinis
group_2875	1	1	0	NA	NA	Strep. parasanguinis
group_2773	1	1	0	NA	NA	Strep. parasanguinis
aceF	1	1	0	NA	NA	Strep. parasanguinis
lpdA	1	1	0	NA	NA	Strep. parasanguinis
acoB	1	1	0	NA	NA	Strep. parasanguinis
lplA	1	1	0	NA	NA	Strep. parasanguinis
acoA~~~pdhA	1	1	0	NA	NA	Strep. parasanguinis
group_2474	1	1	0	NA	NA	Strep. parasanguinis
guaC	1	1	0	NA	NA	Strep. parasanguinis
plsC	1	1	0	NA	NA	Strep. parasanguinis
nlpA	1	1	0	NA	NA	Strep. parasanguinis
group_2061	1	1	0	NA	NA	Strep. parasanguinis
group_2029	1	1	0	NA	NA	Strep. parasanguinis
group_1938	1	1	0	NA	NA	Strep. parasanguinis
manO	1	0.75	0.25	1	1	Strep. parasanguinis
metN	1	1	0	NA	NA	Strep. parasanguinis
metP	1	1	0	NA	NA	Strep. parasanguinis
group_2831	1	1	0	NA	NA	Strep. parasanguinis
lrgA	0	0.625	0.625	0.444444	1	Strep. parasanguinis
aliA~~~sarA~~~oppA	1	1	0	NA	NA	Strep. parasanguinis
clcA	1	1	0	NA	NA	Strep. parasanguinis
group_2215	1	0.75	0.25	1	1	Strep. parasanguinis
pyrG	1	1	0	NA	NA	Strep. parasanguinis
group_20624	0	0	0	NA	NA	Strep. parasanguinis
phoU~~~nptA	1	1	0	NA	NA	Strep. parasanguinis
group_2187	1	1	0	NA	NA	Strep. parasanguinis
ywtF~~~cps4A~~~epsA~~~lytR	1	1	0	NA	NA	Strep. parasanguinis
pepF	1	1	0	NA	NA	Strep. parasanguinis
group_3066	1	1	0	NA	NA	Strep. parasanguinis
rex	1	1	0	NA	NA	Strep. parasanguinis
yeaQ	0	0	0	NA	NA	Strep. parasanguinis
group_3028	1	1	0	NA	NA	Strep. parasanguinis
group_2921	1	1	0	NA	NA	Strep. parasanguinis
msrA~~~msrB~~~msrAB2	0	0	0	NA	NA	Strep. parasanguinis
dtd	1	1	0	NA	NA	Strep. parasanguinis
group_2705	1	1	0	NA	NA	Strep. parasanguinis
ssuE	1	1	0	NA	NA	Strep. parasanguinis
metF	1	1	0	NA	NA	Strep. parasanguinis
group_2654	1	1	0	NA	NA	Strep. parasanguinis
group_2532	1	1	0	NA	NA	Strep. parasanguinis
group_2138	1	1	0	NA	NA	Strep. parasanguinis
murB	0	0	0	NA	NA	Strep. parasanguinis
potA	0	0	0	NA	NA	Strep. parasanguinis
potB	0	0	0	NA	NA	Strep. parasanguinis
ydcV~~~potC	0	0	0	NA	NA	Strep. parasanguinis
potD	0	0	0	NA	NA	Strep. parasanguinis
rpmH	0	0.5	0.5	1	1	Strep. parasanguinis
yhaQ	1	1	0	NA	NA	Strep. parasanguinis
soxR~~~merR~~~pmrA	1	1	0	NA	NA	Strep. parasanguinis
group_2302	1	0.625	0.375	1	1	Strep. parasanguinis
nanE	1	0.625	0.375	1	1	Strep. parasanguinis
cpsE~~~wcaJ~~~epsL	1	1	0	NA	NA	Strep. parasanguinis
sodA	1	1	0	NA	NA	Strep. parasanguinis
ptsN	1	0.75	0.25	1	1	Strep. parasanguinis
sgcC	1	0.75	0.25	1	1	Strep. parasanguinis
sgaB	1	0.75	0.25	1	1	Strep. parasanguinis
ganA	1	1	0	NA	NA	Strep. parasanguinis
gntR~~~ubiC	1	1	0	NA	NA	Strep. parasanguinis
group_3113	1	1	0	NA	NA	Strep. parasanguinis
lgt	1	1	0	NA	NA	Strep. parasanguinis
hprK	1	1	0	NA	NA	Strep. parasanguinis
folC	1	1	0	NA	NA	Strep. parasanguinis
nusG	1	1	0	NA	NA	Strep. parasanguinis
rluA	1	1	0	NA	NA	Strep. parasanguinis
group_2463	1	1	0	NA	NA	Strep. parasanguinis
group_2325	0	1	1	0.111111	1	Strep. parasanguinis
agaS	1	1	0	NA	NA	Strep. parasanguinis
manX	1	1	0	NA	NA	Strep. parasanguinis
manZ	1	1	0	NA	NA	Strep. parasanguinis
manY	1	1	0	NA	NA	Strep. parasanguinis
agaB	1	1	0	NA	NA	Strep. parasanguinis
group_21680	1	1	0	NA	NA	Strep. parasanguinis
dpnI	0	0	0	NA	NA	Strep. parasanguinis
group_2842	1	1	0	NA	NA	Strep. parasanguinis
nupP~~~mglC	0	0	0	NA	NA	Strep. parasanguinis
nifS	1	1	0	NA	NA	Strep. parasanguinis
group_2667	0	0.75	0.75	0.333333	1	Strep. parasanguinis
group_2356	0	0	0	NA	NA	Strep. parasanguinis
adk	1	1	0	NA	NA	Strep. parasanguinis
exp7~~~mgtA	1	1	0	NA	NA	Strep. parasanguinis
gltX	1	1	0	NA	NA	Strep. parasanguinis
ydaF~~~rimL	1	1	0	NA	NA	Strep. parasanguinis
skfE~~~ccmA	0	0	0	NA	NA	Strep. parasanguinis
spxB	1	1	0	NA	NA	Strep. parasanguinis
bglB~~~gmuD~~~bglA	1	1	0	NA	NA	Strep. parasanguinis
lacG	1	0.75	0.25	1	1	Strep. parasanguinis
purF	1	1	0	NA	NA	Strep. parasanguinis
group_674	1	1	0	NA	NA	Strep. parasanguinis
group_21127	1	1	0	NA	NA	Strep. parasanguinis
group_20949	1	1	0	NA	NA	Strep. parasanguinis
group_20671	1	1	0	NA	NA	Strep. parasanguinis
metK	1	1	0	NA	NA	Strep. parasanguinis
group_2798	1	1	0	NA	NA	Strep. parasanguinis
clpL~~~clpA	1	1	0	NA	NA	Strep. parasanguinis
trmL~~~trmH	0	0	0	NA	NA	Strep. parasanguinis
group_3119	0	0	0	NA	NA	Strep. parasanguinis
trkH~~~trkG	0	0	0	NA	NA	Strep. parasanguinis
group_2905	0	0	0	NA	NA	Strep. parasanguinis
niaR	0	0	0	NA	NA	Strep. parasanguinis
group_2838	0	0	0	NA	NA	Strep. parasanguinis
rfbB	1	1	0	NA	NA	Strep. parasanguinis
rfbC	1	1	0	NA	NA	Strep. parasanguinis
rfbA	1	1	0	NA	NA	Strep. parasanguinis
group_2706	1	1	0	NA	NA	Strep. parasanguinis
ppaX~~~gph	0	0	0	NA	NA	Strep. parasanguinis
group_2371	0	0	0	NA	NA	Strep. parasanguinis
pgl	0	0	0	NA	NA	Strep. parasanguinis
dprA	0	0	0	NA	NA	Strep. parasanguinis
holA	0	0	0	NA	NA	Strep. parasanguinis
trpS	0	0	0	NA	NA	Strep. parasanguinis
guaB	0	0	0	NA	NA	Strep. parasanguinis
recF	0	0	0	NA	NA	Strep. parasanguinis
group_20151	0	0	0	NA	NA	Strep. parasanguinis
rpsZ	1	1	0	NA	NA	Strep. parasanguinis
group_2816	0	0	0	NA	NA	Strep. parasanguinis
secE	1	1	0	NA	NA	Strep. parasanguinis
def	0	0	0	NA	NA	Strep. parasanguinis
panT	0	0	0	NA	NA	Strep. parasanguinis
group_2276	0	0	0	NA	NA	Strep. parasanguinis
ampS~~~pepS	1	1	0	NA	NA	Strep. parasanguinis
carA	0	0	0	NA	NA	Strep. parasanguinis
group_2168	0	0	0	NA	NA	Strep. parasanguinis
sstT	1	1	0	NA	NA	Strep. parasanguinis
group_1302	0	0	0	NA	NA	Strep. parasanguinis
group_20740	1	1	0	NA	NA	Strep. parasanguinis
group_20307	1	1	0	NA	NA	Strep. parasanguinis
group_19692	1	1	0	NA	NA	Strep. parasanguinis
group_3114	0	0	0	NA	NA	Strep. parasanguinis
scpB	0	0	0	NA	NA	Strep. parasanguinis
scpA	0	0	0	NA	NA	Strep. parasanguinis
cbpB	0	0	0	NA	NA	Strep. parasanguinis
group_3106	0	0	0	NA	NA	Strep. parasanguinis
racE	0	0	0	NA	NA	Strep. parasanguinis
group_3103	0	0	0	NA	NA	Strep. parasanguinis
amyA	0	0	0	NA	NA	Strep. parasanguinis
group_2926	1	1	0	NA	NA	Strep. parasanguinis
group_2922	1	1	0	NA	NA	Strep. parasanguinis
group_2889	0	0.125	0.125	1	1	Strep. parasanguinis
ccc1	1	1	0	NA	NA	Strep. parasanguinis
group_2745	1	1	0	NA	NA	Strep. parasanguinis
pfkB	1	1	0	NA	NA	Strep. parasanguinis
lytR~~~cps2a	0	0	0	NA	NA	Strep. parasanguinis
recN	1	1	0	NA	NA	Strep. parasanguinis
xseB	1	1	0	NA	NA	Strep. parasanguinis
yqxC	1	1	0	NA	NA	Strep. parasanguinis
group_2213	1	1	0	NA	NA	Strep. parasanguinis
group_2018	1	1	0	NA	NA	Strep. parasanguinis
eamA~~~yicL	0	0	0	NA	NA	Strep. parasanguinis
deoB	1	1	0	NA	NA	Strep. parasanguinis
macP	0	0	0	NA	NA	Strep. parasanguinis
mccC~~~ldcA	1	0.75	0.25	1	1	Strep. parasanguinis
group_3018	1	1	0	NA	NA	Strep. parasanguinis
metA	0	0	0	NA	NA	Strep. parasanguinis
glmS	1	1	0	NA	NA	Strep. parasanguinis
egtUBC	1	1	0	NA	NA	Strep. parasanguinis
egtUA	1	1	0	NA	NA	Strep. parasanguinis
rny	0	0	0	NA	NA	Strep. parasanguinis
luxS	0	0	0	NA	NA	Strep. parasanguinis
lacE~~~celB	1	0.75	0.25	1	1	Strep. parasanguinis
lacF	1	0.75	0.25	1	1	Strep. parasanguinis
yqfA	0	0	0	NA	NA	Strep. parasanguinis
oatA~~~oafA	1	1	0	NA	NA	Strep. parasanguinis
group_3097	1	1	0	NA	NA	Strep. parasanguinis
eMAP	1	1	0	NA	NA	Strep. parasanguinis
pepA	1	1	0	NA	NA	Strep. parasanguinis
tpx	1	1	0	NA	NA	Strep. parasanguinis
pgk	1	1	0	NA	NA	Strep. parasanguinis
group_1420	1	1	0	NA	NA	Strep. parasanguinis
lysA	0	0	0	NA	NA	Strep. parasanguinis
glpK	1	1	0	NA	NA	Strep. parasanguinis
group_2444	1	1	0	NA	NA	Strep. parasanguinis
group_2725	1	1	0	NA	NA	Strep. parasanguinis
ugpE	1	0.625	0.375	1	1	Strep. parasanguinis
ugpB	1	0.625	0.375	1	1	Strep. parasanguinis
ssnA	0	0	0	NA	NA	Strep. parasanguinis
cpsD~~~mrp	0	0	0	NA	NA	Strep. parasanguinis
group_1598	1	1	0	NA	NA	Strep. parasanguinis
group_21542	1	1	0	NA	NA	Strep. parasanguinis
group_20219	1	1	0	NA	NA	Strep. parasanguinis
group_19557	1	1	0	NA	NA	Strep. parasanguinis
group_3109	1	1	0	NA	NA	Strep. parasanguinis
rseP~~~ftsL	1	1	0	NA	NA	Strep. parasanguinis
cdsA	1	1	0	NA	NA	Strep. parasanguinis
uppS	1	1	0	NA	NA	Strep. parasanguinis
ecfT~~~mtsC~~~cbiQ	0	0.625	0.625	0.444444	1	Strep. parasanguinis
group_2627	1	1	0	NA	NA	Strep. parasanguinis
group_1411	1	1	0	NA	NA	Strep. parasanguinis
sufB	1	1	0	NA	NA	Strep. parasanguinis
group_2980	0	0	0	NA	NA	Strep. parasanguinis
macB~~~lolD	1	0.875	0.125	1	1	Strep. parasanguinis
entS	1	1	0	NA	NA	Strep. parasanguinis
lacF~~~ugpA	1	0.625	0.375	1	1	Strep. parasanguinis
group_1834	1	1	0	NA	NA	Strep. parasanguinis
group_1563	1	0.25	0.75	0.333333	1	Strep. parasanguinis
galM	0	0	0	NA	NA	Strep. parasanguinis
paaD	1	1	0	NA	NA	Strep. parasanguinis
group_3098	1	1	0	NA	NA	Strep. parasanguinis
rfbX~~~matE	1	0.25	0.75	0.333333	1	Strep. parasanguinis
comE~~~comEB	1	1	0	NA	NA	Strep. parasanguinis
ykgJ	1	1	0	NA	NA	Strep. parasanguinis
group_2830	1	1	0	NA	NA	Strep. parasanguinis
group_2806	1	1	0	NA	NA	Strep. parasanguinis
mutX	1	1	0	NA	NA	Strep. parasanguinis
pyrC~~~allB	1	1	0	NA	NA	Strep. parasanguinis
cshB~~~srmB	1	1	0	NA	NA	Strep. parasanguinis
yajC	1	1	0	NA	NA	Strep. parasanguinis
map	1	1	0	NA	NA	Strep. parasanguinis
deoR~~~glpR	1	1	0	NA	NA	Strep. parasanguinis
group_2434	1	1	0	NA	NA	Strep. parasanguinis
murA2~~~murA	1	1	0	NA	NA	Strep. parasanguinis
pheS	1	1	0	NA	NA	Strep. parasanguinis
group_2175	1	1	0	NA	NA	Strep. parasanguinis
xseA	1	1	0	NA	NA	Strep. parasanguinis
group_1761	1	1	0	NA	NA	Strep. parasanguinis
group_1716	1	1	0	NA	NA	Strep. parasanguinis
typA	1	1	0	NA	NA	Strep. parasanguinis
thrS~~~adk	1	1	0	NA	NA	Strep. parasanguinis
glpE~~~moeZ~~~pspE	1	1	0	NA	NA	Strep. parasanguinis
yqgQ	1	1	0	NA	NA	Strep. parasanguinis
zinT~~~adcA~~~yodA	1	1	0	NA	NA	Strep. parasanguinis
znuB	1	1	0	NA	NA	Strep. parasanguinis
leuB	1	1	0	NA	NA	Strep. parasanguinis
leuA	1	1	0	NA	NA	Strep. parasanguinis
group_1572	1	1	0	NA	NA	Strep. parasanguinis
znuC~~~adcC	1	1	0	NA	NA	Strep. parasanguinis
leuC	1	1	0	NA	NA	Strep. parasanguinis
leuD	1	1	0	NA	NA	Strep. parasanguinis
tsaC	1	1	0	NA	NA	Strep. parasanguinis
group_3005	1	1	0	NA	NA	Strep. parasanguinis
metC	1	1	0	NA	NA	Strep. parasanguinis
group_2832	0	0	0	NA	NA	Strep. parasanguinis
azlC	0	0	0	NA	NA	Strep. parasanguinis
group_2565	1	1	0	NA	NA	Strep. parasanguinis
dps	1	1	0	NA	NA	Strep. parasanguinis
group_1987	1	1	0	NA	NA	Strep. parasanguinis
group_1949	1	1	0	NA	NA	Strep. parasanguinis
murG	1	1	0	NA	NA	Strep. parasanguinis
murD	1	1	0	NA	NA	Strep. parasanguinis
folD	1	1	0	NA	NA	Strep. parasanguinis
ykuJ	1	1	0	NA	NA	Strep. parasanguinis
clpA~~~clpE	1	1	0	NA	NA	Strep. parasanguinis
group_3009	0	0.875	0.875	0.222222	1	Strep. parasanguinis
yecS~~~hisM	0	0.875	0.875	0.222222	1	Strep. parasanguinis
hmpT~~~pdxU2~~~eCFS	0	0	0	NA	NA	Strep. parasanguinis
group_2230	1	1	0	NA	NA	Strep. parasanguinis
group_1765	1	1	0	NA	NA	Strep. parasanguinis
lacT~~~bglG	0	0	0	NA	NA	Strep. parasanguinis
czcD	1	1	0	NA	NA	Strep. parasanguinis
group_20936	1	1	0	NA	NA	Strep. parasanguinis
phnB	1	0.875	0.125	1	1	Strep. parasanguinis
group_20645	1	1	0	NA	NA	Strep. parasanguinis
group_20184	1	1	0	NA	NA	Strep. parasanguinis
fmnP	0	0	0	NA	NA	Strep. parasanguinis
hemH	0	0.625	0.625	0.444444	1	Strep. parasanguinis
fabZ~~~paaI	1	1	0	NA	NA	Strep. parasanguinis
group_2732	1	1	0	NA	NA	Strep. parasanguinis
group_2630	1	0.625	0.375	1	1	Strep. parasanguinis
group_2619	1	0.625	0.375	1	1	Strep. parasanguinis
sepM~~~coaD~~~sdrC	0	0	0	NA	NA	Strep. parasanguinis
group_2542	0	0	0	NA	NA	Strep. parasanguinis
pTC1~~~phpP	0	0	0	NA	NA	Strep. parasanguinis
rsmB	0	0	0	NA	NA	Strep. parasanguinis
group_2223	0	0	0	NA	NA	Strep. parasanguinis
fmt	0	0	0	NA	NA	Strep. parasanguinis
group_2009	0	0	0	NA	NA	Strep. parasanguinis
group_1893	1	1	0	NA	NA	Strep. parasanguinis
rpoZ	0	0	0	NA	NA	Strep. parasanguinis
group_1805	0	0	0	NA	NA	Strep. parasanguinis
group_1763	0	0	0	NA	NA	Strep. parasanguinis
gmk	0	0	0	NA	NA	Strep. parasanguinis
group_1535	0	0	0	NA	NA	Strep. parasanguinis
comF~~~recG~~~comFA	0	0	0	NA	NA	Strep. parasanguinis
yigZ~~~yIH1	0	0	0	NA	NA	Strep. parasanguinis
cysK	0	0	0	NA	NA	Strep. parasanguinis
ylbG	0	0	0	NA	NA	Strep. parasanguinis
acpP	0	0	0	NA	NA	Strep. parasanguinis
gsiA	0	0.625	0.625	0.444444	1	Strep. parasanguinis
ytpP~~~trxA	1	1	0	NA	NA	Strep. parasanguinis
group_3051	1	1	0	NA	NA	Strep. parasanguinis
groL	1	1	0	NA	NA	Strep. parasanguinis
groES	1	1	0	NA	NA	Strep. parasanguinis
gntR~~~ytrA~~~yhcF	0	0	0	NA	NA	Strep. parasanguinis
group_2189	1	1	0	NA	NA	Strep. parasanguinis
group_2079	0	0.625	0.625	0.444444	1	Strep. parasanguinis
group_1336	1	1	0	NA	NA	Strep. parasanguinis
tauC	1	1	0	NA	NA	Strep. parasanguinis
tyrS	1	1	0	NA	NA	Strep. parasanguinis
group_2809	1	1	0	NA	NA	Strep. parasanguinis
mntH	1	1	0	NA	NA	Strep. parasanguinis
ywnA~~~iscR	1	1	0	NA	NA	Strep. parasanguinis
rgfB~~~elsH	1	1	0	NA	NA	Strep. parasanguinis
marR~~~mgrA	1	1	0	NA	NA	Strep. parasanguinis
group_2184	1	1	0	NA	NA	Strep. parasanguinis
group_2133	1	1	0	NA	NA	Strep. parasanguinis
udp	1	1	0	NA	NA	Strep. parasanguinis
frmB	1	1	0	NA	NA	Strep. parasanguinis
focA	0	0	0	NA	NA	Strep. parasanguinis
phoE	1	1	0	NA	NA	Strep. parasanguinis
ansP	1	1	0	NA	NA	Strep. parasanguinis
dexB	1	1	0	NA	NA	Strep. parasanguinis
group_2874	1	1	0	NA	NA	Strep. parasanguinis
group_2864	1	1	0	NA	NA	Strep. parasanguinis
rggC~~~mutR	1	1	0	NA	NA	Strep. parasanguinis
femA~~~murN	1	0.75	0.25	1	1	Strep. parasanguinis
group_1388	1	0.25	0.75	0.333333	1	Strep. parasanguinis
group_2857	1	1	0	NA	NA	Strep. parasanguinis
group_2644	1	0.75	0.25	1	1	Strep. parasanguinis
group_2622	1	1	0	NA	NA	Strep. parasanguinis
spxR~~~fabZ	1	1	0	NA	NA	Strep. parasanguinis
group_1552	1	1	0	NA	NA	Strep. parasanguinis
group_7075	1	1	0	NA	NA	Strep. parasanguinis
group_3069	1	1	0	NA	NA	Strep. parasanguinis
nrdI	1	0.875	0.125	1	1	Strep. parasanguinis
group_2517	1	1	0	NA	NA	Strep. parasanguinis
queT	1	1	0	NA	NA	Strep. parasanguinis
group_847	0	0	0	NA	NA	Strep. parasanguinis
yidD	0	0	0	NA	NA	Strep. parasanguinis
glmM	1	1	0	NA	NA	Strep. parasanguinis
group_2755	1	1	0	NA	NA	Strep. parasanguinis
group_2736	1	1	0	NA	NA	Strep. parasanguinis
group_2377	1	1	0	NA	NA	Strep. parasanguinis
group_2351	1	1	0	NA	NA	Strep. parasanguinis
group_2256	1	0.625	0.375	1	1	Strep. parasanguinis
adhP	1	1	0	NA	NA	Strep. parasanguinis
aspB~~~alaT	1	1	0	NA	NA	Strep. parasanguinis
codY	1	1	0	NA	NA	Strep. parasanguinis
pncA~~~yecD	1	1	0	NA	NA	Strep. parasanguinis
gatC	1	1	0	NA	NA	Strep. parasanguinis
gatA	1	1	0	NA	NA	Strep. parasanguinis
gatB	1	1	0	NA	NA	Strep. parasanguinis
ybaB	1	1	0	NA	NA	Strep. parasanguinis
group_2511	1	1	0	NA	NA	Strep. parasanguinis
ypuA	1	1	0	NA	NA	Strep. parasanguinis
group_1839	1	0.875	0.125	1	1	Strep. parasanguinis
yqjI~~~padR	0	0	0	NA	NA	Strep. parasanguinis
acrR~~~tetR	1	1	0	NA	NA	Strep. parasanguinis
tesA	0	0	0	NA	NA	Strep. parasanguinis
glnR~~~merR	1	0.875	0.125	1	1	Strep. parasanguinis
ygaE	1	0.875	0.125	1	1	Strep. parasanguinis
group_21453	1	1	0	NA	NA	Strep. parasanguinis
group_6963	1	1	0	NA	NA	Strep. parasanguinis
pstS	1	1	0	NA	NA	Strep. parasanguinis
frvX	1	0.75	0.25	1	1	Strep. parasanguinis
pstA	1	1	0	NA	NA	Strep. parasanguinis
group_2817	1	1	0	NA	NA	Strep. parasanguinis
pstB	1	1	0	NA	NA	Strep. parasanguinis
group_2646	1	1	0	NA	NA	Strep. parasanguinis
rocS	1	1	0	NA	NA	Strep. parasanguinis
group_2620	1	1	0	NA	NA	Strep. parasanguinis
tehA	1	1	0	NA	NA	Strep. parasanguinis
group_1576	1	1	0	NA	NA	Strep. parasanguinis
mnaT	1	1	0	NA	NA	Strep. parasanguinis
lctO	1	0.125	0.875	0.222222	1	Strep. parasanguinis
group_20118	1	1	0	NA	NA	Strep. parasanguinis
group_3087	1	1	0	NA	NA	Strep. parasanguinis
group_2965	1	1	0	NA	NA	Strep. parasanguinis
group_2684	1	1	0	NA	NA	Strep. parasanguinis
mraW	1	1	0	NA	NA	Strep. parasanguinis
group_2683	1	1	0	NA	NA	Strep. parasanguinis
nhaP	1	1	0	NA	NA	Strep. parasanguinis
treC	0	0.875	0.875	0.222222	1	Strep. parasanguinis
nadR	1	1	0	NA	NA	Strep. parasanguinis
ald	1	1	0	NA	NA	Strep. parasanguinis
axe1	1	1	0	NA	NA	Strep. parasanguinis
group_1136	0	0	0	NA	NA	Strep. parasanguinis
group_21375	0	0	0	NA	NA	Strep. parasanguinis
group_21328	0	0	0	NA	NA	Strep. parasanguinis
group_21314	0	0	0	NA	NA	Strep. parasanguinis
galT2~~~galT	0	0	0	NA	NA	Strep. parasanguinis
group_21128	0	0	0	NA	NA	Strep. parasanguinis
group_19418	0	0	0	NA	NA	Strep. parasanguinis
group_3070	0	0	0	NA	NA	Strep. parasanguinis
yheI~~~msbA~~~mdlB~~~patA	0	0	0	NA	NA	Strep. parasanguinis
group_2934	0	0	0	NA	NA	Strep. parasanguinis
arcA	1	1	0	NA	NA	Strep. parasanguinis
group_2930	1	1	0	NA	NA	Strep. parasanguinis
yfcC~~~arcD	1	1	0	NA	NA	Strep. parasanguinis
arcC	1	1	0	NA	NA	Strep. parasanguinis
pnuC	1	0.875	0.125	1	1	Strep. parasanguinis
puuD	1	1	0	NA	NA	Strep. parasanguinis
moeZ~~~pspE	1	1	0	NA	NA	Strep. parasanguinis
ispA	0	0	0	NA	NA	Strep. parasanguinis
group_1804	0	0	0	NA	NA	Strep. parasanguinis
group_1771	0	0	0	NA	NA	Strep. parasanguinis
marR~~~adcR	0	0	0	NA	NA	Strep. parasanguinis
tauB	0	0	0	NA	NA	Strep. parasanguinis
group_21245	0	0	0	NA	NA	Strep. parasanguinis
sdbB	0	0	0	NA	NA	Strep. parasanguinis
mutT	1	1	0	NA	NA	Strep. parasanguinis
aF0785	1	0.25	0.75	0.333333	1	Strep. parasanguinis
group_3121	0	0	0	NA	NA	Strep. parasanguinis
argF	1	1	0	NA	NA	Strep. parasanguinis
group_2759	0	0	0	NA	NA	Strep. parasanguinis
group_2482	1	0.625	0.375	1	1	Strep. parasanguinis
eCFS	0	0	0	NA	NA	Strep. parasanguinis
glyP~~~alsT	1	1	0	NA	NA	Strep. parasanguinis
group_1312	1	0.375	0.625	0.444444	1	Strep. parasanguinis
group_21273	1	0.75	0.25	1	1	Strep. parasanguinis
araQ~~~ugpE	1	0.75	0.25	1	1	Strep. parasanguinis
group_21025	1	0.75	0.25	1	1	Strep. parasanguinis
group_20781	1	0.75	0.25	1	1	Strep. parasanguinis
group_20387	1	0.75	0.25	1	1	Strep. parasanguinis
group_3053	1	0.25	0.75	0.333333	1	Strep. parasanguinis
group_2358	1	1	0	NA	NA	Strep. parasanguinis
group_2341	0	0.625	0.625	0.444444	1	Strep. parasanguinis
group_2340	0	0	0	NA	NA	Strep. parasanguinis
group_1920	1	0.875	0.125	1	1	Strep. parasanguinis
yfcE	1	1	0	NA	NA	Strep. parasanguinis
group_493	1	0.75	0.25	1	1	Strep. parasanguinis
mngB	1	0.75	0.25	1	1	Strep. parasanguinis
yitW	1	1	0	NA	NA	Strep. parasanguinis
group_20317	1	1	0	NA	NA	Strep. parasanguinis
group_19697	1	1	0	NA	NA	Strep. parasanguinis
group_7054	1	1	0	NA	NA	Strep. parasanguinis
ssuB	1	1	0	NA	NA	Strep. parasanguinis
group_2997	1	1	0	NA	NA	Strep. parasanguinis
dnaI	1	1	0	NA	NA	Strep. parasanguinis
group_2938	1	1	0	NA	NA	Strep. parasanguinis
nrdR	1	1	0	NA	NA	Strep. parasanguinis
group_2763	1	1	0	NA	NA	Strep. parasanguinis
group_2408	1	1	0	NA	NA	Strep. parasanguinis
group_2406	1	1	0	NA	NA	Strep. parasanguinis
queH	0	0	0	NA	NA	Strep. parasanguinis
group_1697	1	1	0	NA	NA	Strep. parasanguinis
group_1107	1	1	0	NA	NA	Strep. parasanguinis
rgpG	1	1	0	NA	NA	Strep. parasanguinis
ebsA	1	1	0	NA	NA	Strep. parasanguinis
glpF	0	0	0	NA	NA	Strep. parasanguinis
lacI~~~galR~~~purR	0	0	0	NA	NA	Strep. parasanguinis
group_19108	1	0.75	0.25	1	1	Strep. parasanguinis
group_2964	0	0	0	NA	NA	Strep. parasanguinis
group_2939	0	0	0	NA	NA	Strep. parasanguinis
group_2896	0	0	0	NA	NA	Strep. parasanguinis
tqsA	0	0	0	NA	NA	Strep. parasanguinis
group_2868	0	0	0	NA	NA	Strep. parasanguinis
group_2780	1	1	0	NA	NA	Strep. parasanguinis
group_2645	1	1	0	NA	NA	Strep. parasanguinis
rdgB	0	0	0	NA	NA	Strep. parasanguinis
lacI~~~malR~~~purR	0	0	0	NA	NA	Strep. parasanguinis
malD	0	0	0	NA	NA	Strep. parasanguinis
group_2376	1	1	0	NA	NA	Strep. parasanguinis
malC	0	0	0	NA	NA	Strep. parasanguinis
malX	0	0	0	NA	NA	Strep. parasanguinis
malQ	0	0	0	NA	NA	Strep. parasanguinis
malP~~~glgP	0	0	0	NA	NA	Strep. parasanguinis
queA	0	0	0	NA	NA	Strep. parasanguinis
saeR	0	0	0	NA	NA	Strep. parasanguinis
pavB	0	0	0	NA	NA	Strep. parasanguinis
btuE	1	1	0	NA	NA	Strep. parasanguinis
xerC	0	0.5	0.5	1	1	Strep. parasanguinis
group_1114	1	1	0	NA	NA	Strep. parasanguinis
group_17988	1	0.75	0.25	1	1	Strep. parasanguinis
yheS~~~msr~~~msrD	1	0.75	0.25	1	1	Strep. parasanguinis
group_14281	1	0.75	0.25	1	1	Strep. parasanguinis
group_12357	1	0.75	0.25	1	1	Strep. parasanguinis
group_7085	1	1	0	NA	NA	Strep. parasanguinis
group_7057	1	1	0	NA	NA	Strep. parasanguinis
walK	0	0	0	NA	NA	Strep. parasanguinis
rutF	1	1	0	NA	NA	Strep. parasanguinis
clpX	1	1	0	NA	NA	Strep. parasanguinis
yihA	1	1	0	NA	NA	Strep. parasanguinis
group_2932	1	1	0	NA	NA	Strep. parasanguinis
yheH	1	1	0	NA	NA	Strep. parasanguinis
trxA	1	1	0	NA	NA	Strep. parasanguinis
group_2802	1	1	0	NA	NA	Strep. parasanguinis
group_2801	1	1	0	NA	NA	Strep. parasanguinis
budA	1	1	0	NA	NA	Strep. parasanguinis
group_2784	1	1	0	NA	NA	Strep. parasanguinis
arcR	1	1	0	NA	NA	Strep. parasanguinis
ygaC	1	1	0	NA	NA	Strep. parasanguinis
cdaA	1	1	0	NA	NA	Strep. parasanguinis
group_2399	1	1	0	NA	NA	Strep. parasanguinis
group_2306	1	1	0	NA	NA	Strep. parasanguinis
group_2110	1	1	0	NA	NA	Strep. parasanguinis
group_2010	1	1	0	NA	NA	Strep. parasanguinis
group_1986	1	1	0	NA	NA	Strep. parasanguinis
group_1971	1	1	0	NA	NA	Strep. parasanguinis
group_1918	1	1	0	NA	NA	Strep. parasanguinis
group_1862	1	1	0	NA	NA	Strep. parasanguinis
group_1835	1	1	0	NA	NA	Strep. parasanguinis
recR	1	1	0	NA	NA	Strep. parasanguinis
thrE	1	1	0	NA	NA	Strep. parasanguinis
ydaF	1	1	0	NA	NA	Strep. parasanguinis
phoH	1	1	0	NA	NA	Strep. parasanguinis
pbp2b	1	1	0	NA	NA	Strep. parasanguinis
yozE	1	1	0	NA	NA	Strep. parasanguinis
cvfB	1	1	0	NA	NA	Strep. parasanguinis
group_1732	1	1	0	NA	NA	Strep. parasanguinis
tagH	1	1	0	NA	NA	Strep. parasanguinis
frr	1	1	0	NA	NA	Strep. parasanguinis
pyrH	1	1	0	NA	NA	Strep. parasanguinis
group_1501	1	1	0	NA	NA	Strep. parasanguinis
wfgD~~~wcaA	1	1	0	NA	NA	Strep. parasanguinis
rgpA~~~rfaB	1	1	0	NA	NA	Strep. parasanguinis
pgsA	1	1	0	NA	NA	Strep. parasanguinis
ecfA2	1	1	0	NA	NA	Strep. parasanguinis
ecfT	1	1	0	NA	NA	Strep. parasanguinis
wbbJ	1	1	0	NA	NA	Strep. parasanguinis
group_1009	1	1	0	NA	NA	Strep. parasanguinis
lCB5	1	1	0	NA	NA	Strep. parasanguinis
group_924	0	1	1	0.111111	1	Strep. parasanguinis
mecA	1	1	0	NA	NA	Strep. parasanguinis
ydbC	1	1	0	NA	NA	Strep. parasanguinis
group_2928	1	0.875	0.125	1	1	Strep. parasanguinis
rbfA	1	1	0	NA	NA	Strep. parasanguinis
catE	0	0	0	NA	NA	Strep. parasanguinis
rlmD	1	1	0	NA	NA	Strep. parasanguinis
group_2661	0	0.25	0.25	1	1	Strep. parasanguinis
trmFO	1	1	0	NA	NA	Strep. parasanguinis
group_2395	1	1	0	NA	NA	Strep. parasanguinis
group_2394	1	1	0	NA	NA	Strep. parasanguinis
group_1756	1	1	0	NA	NA	Strep. parasanguinis
group_1630	1	0.875	0.125	1	1	Strep. parasanguinis
group_1183	1	1	0	NA	NA	Strep. parasanguinis
group_1031	1	1	0	NA	NA	Strep. parasanguinis
yidA	1	1	0	NA	NA	Strep. parasanguinis
group_19361	0	0	0	NA	NA	Strep. parasanguinis
group_3012	1	1	0	NA	NA	Strep. parasanguinis
group_3000	1	1	0	NA	NA	Strep. parasanguinis
group_2916	1	1	0	NA	NA	Strep. parasanguinis
group_2803	1	0.75	0.25	1	1	Strep. parasanguinis
phoU	1	1	0	NA	NA	Strep. parasanguinis
treR~~~gntR	0	1	1	0.111111	1	Strep. parasanguinis
group_2624	1	1	0	NA	NA	Strep. parasanguinis
ylxR	1	1	0	NA	NA	Strep. parasanguinis
group_2618	1	1	0	NA	NA	Strep. parasanguinis
group_2617	1	1	0	NA	NA	Strep. parasanguinis
group_2616	1	1	0	NA	NA	Strep. parasanguinis
group_2607	1	1	0	NA	NA	Strep. parasanguinis
trmB	1	1	0	NA	NA	Strep. parasanguinis
rimP	1	1	0	NA	NA	Strep. parasanguinis
nusA	1	1	0	NA	NA	Strep. parasanguinis
group_2569	1	1	0	NA	NA	Strep. parasanguinis
group_2568	1	1	0	NA	NA	Strep. parasanguinis
group_2530	1	1	0	NA	NA	Strep. parasanguinis
group_2505	1	1	0	NA	NA	Strep. parasanguinis
group_2432	1	1	0	NA	NA	Strep. parasanguinis
group_2431	1	1	0	NA	NA	Strep. parasanguinis
ebgC	1	0.625	0.375	1	1	Strep. parasanguinis
yciW	0	0	0	NA	NA	Strep. parasanguinis
group_7010	1	1	0	NA	NA	Strep. parasanguinis
lytN~~~lysM	1	1	0	NA	NA	Strep. parasanguinis
yadH	1	1	0	NA	NA	Strep. parasanguinis
group_3015	1	1	0	NA	NA	Strep. parasanguinis
yjaB~~~rimI	1	0.75	0.25	1	1	Strep. parasanguinis
efeO	1	1	0	NA	NA	Strep. parasanguinis
group_2533	0	0	0	NA	NA	Strep. parasanguinis
group_2323	1	1	0	NA	NA	Strep. parasanguinis
group_2259	1	0.375	0.625	0.444444	1	Strep. parasanguinis
group_2203	1	1	0	NA	NA	Strep. parasanguinis
group_2109	1	1	0	NA	NA	Strep. parasanguinis
group_1992	1	0.75	0.25	1	1	Strep. parasanguinis
rae1~~~yacP	1	1	0	NA	NA	Strep. parasanguinis
group_1294	1	0.375	0.625	0.444444	1	Strep. parasanguinis
group_40	0	0.25	0.25	1	1	Strep. parasanguinis
group_19694	0	0	0	NA	NA	Strep. parasanguinis
group_18651	0	0	0	NA	NA	Strep. parasanguinis
group_18650	0	0	0	NA	NA	Strep. parasanguinis
group_16932	0	0	0	NA	NA	Strep. parasanguinis
group_2920	1	1	0	NA	NA	Strep. parasanguinis
csoR	0	0	0	NA	NA	Strep. parasanguinis
group_2735	0	0	0	NA	NA	Strep. parasanguinis
uraA	0	0	0	NA	NA	Strep. parasanguinis
group_2496	1	1	0	NA	NA	Strep. parasanguinis
group_2226	0	0	0	NA	NA	Strep. parasanguinis
group_2160	1	0.875	0.125	1	1	Strep. parasanguinis
group_2098	1	1	0	NA	NA	Strep. parasanguinis
group_2074	1	0.75	0.25	1	1	Strep. parasanguinis
group_1692	0	0	0	NA	NA	Strep. parasanguinis
xRE	1	0.25	0.75	0.333333	1	Strep. parasanguinis
group_1340	0	0	0	NA	NA	Strep. parasanguinis
ydeA	1	0.875	0.125	1	1	Strep. parasanguinis
group_630	0	0	0	NA	NA	Strep. parasanguinis
group_629	0	0	0	NA	NA	Strep. parasanguinis
group_398	0	0	0	NA	NA	Strep. parasanguinis
group_21766	0	0	0	NA	NA	Strep. parasanguinis
group_20127	0	0	0	NA	NA	Strep. parasanguinis
group_16025	1	0.75	0.25	1	1	Strep. parasanguinis
group_2658	1	1	0	NA	NA	Strep. parasanguinis
argA~~~ywnH	0	0	0	NA	NA	Strep. parasanguinis
group_2587	0	0	0	NA	NA	Strep. parasanguinis
group_2576	0	0	0	NA	NA	Strep. parasanguinis
group_2269	0	0	0	NA	NA	Strep. parasanguinis
ppiB	0	0	0	NA	NA	Strep. parasanguinis
group_1326	1	1	0	NA	NA	Strep. parasanguinis
menH	0	0	0	NA	NA	Strep. parasanguinis
group_15983	1	0.75	0.25	1	1	Strep. parasanguinis
mazG	1	0.75	0.25	1	1	Strep. parasanguinis
glpE	0	0	0	NA	NA	Strep. parasanguinis
yhbS	0	0	0	NA	NA	Strep. parasanguinis
group_21716	0	0	0	NA	NA	Strep. parasanguinis
group_20378	1	0	1	0.111111	1	Strep. parasanguinis
group_3117	0	0.25	0.25	1	1	Strep. parasanguinis
group_3054	1	1	0	NA	NA	Strep. parasanguinis
zupT	1	0.875	0.125	1	1	Strep. parasanguinis
trmH~~~spoU	0	0	0	NA	NA	Strep. parasanguinis
acyP	0	0	0	NA	NA	Strep. parasanguinis
group_2083	0	0	0	NA	NA	Strep. parasanguinis
norM~~~dinF	0	0	0	NA	NA	Strep. parasanguinis
srtB	1	1	0	NA	NA	Strep. parasanguinis
ppsA	0	0	0	NA	NA	Strep. parasanguinis
group_21781	0	0	0	NA	NA	Strep. parasanguinis
group_21750	0	0	0	NA	NA	Strep. parasanguinis
trkG~~~trkH	0	0	0	NA	NA	Strep. parasanguinis
group_21713	0	0	0	NA	NA	Strep. parasanguinis
group_21701	0	0	0	NA	NA	Strep. parasanguinis
group_21667	0	0	0	NA	NA	Strep. parasanguinis
group_21623	0	0	0	NA	NA	Strep. parasanguinis
group_21582	0	0	0	NA	NA	Strep. parasanguinis
group_21493	0	0	0	NA	NA	Strep. parasanguinis
group_21480	0	0	0	NA	NA	Strep. parasanguinis
group_21470	0	0	0	NA	NA	Strep. parasanguinis
group_21469	0	0	0	NA	NA	Strep. parasanguinis
group_21467	0	0	0	NA	NA	Strep. parasanguinis
ampH~~~ampC	0	0	0	NA	NA	Strep. parasanguinis
group_21451	0	0	0	NA	NA	Strep. parasanguinis
pcnB~~~cca	0	0	0	NA	NA	Strep. parasanguinis
group_21421	0	0	0	NA	NA	Strep. parasanguinis
group_21382	0	0	0	NA	NA	Strep. parasanguinis
group_21379	0	0	0	NA	NA	Strep. parasanguinis
group_21336	0	0	0	NA	NA	Strep. parasanguinis
group_21330	0	0	0	NA	NA	Strep. parasanguinis
group_21325	0	0	0	NA	NA	Strep. parasanguinis
group_21324	0	0	0	NA	NA	Strep. parasanguinis
group_21320	0	0	0	NA	NA	Strep. parasanguinis
arsC~~~adaB	0	0	0	NA	NA	Strep. parasanguinis
group_21305	0	0	0	NA	NA	Strep. parasanguinis
group_21284	0	0	0	NA	NA	Strep. parasanguinis
salY~~~yknZ	0	0	0	NA	NA	Strep. parasanguinis
ecsA~~~ccmA	0	0	0	NA	NA	Strep. parasanguinis
fabZ~~~fatA	0	0	0	NA	NA	Strep. parasanguinis
group_21267	0	0	0	NA	NA	Strep. parasanguinis
group_21266	0	0	0	NA	NA	Strep. parasanguinis
group_21258	0	0	0	NA	NA	Strep. parasanguinis
group_21257	0	0	0	NA	NA	Strep. parasanguinis
group_21251	0	0	0	NA	NA	Strep. parasanguinis
group_21232	0	0	0	NA	NA	Strep. parasanguinis
celB~~~comEC	0	0	0	NA	NA	Strep. parasanguinis
group_21199	0	0	0	NA	NA	Strep. parasanguinis
group_21197	0	0	0	NA	NA	Strep. parasanguinis
group_21196	0	0	0	NA	NA	Strep. parasanguinis
group_21195	0	0	0	NA	NA	Strep. parasanguinis
group_21194	0	0	0	NA	NA	Strep. parasanguinis
group_21181	0	0	0	NA	NA	Strep. parasanguinis
group_21164	0	0	0	NA	NA	Strep. parasanguinis
htrA~~~degQ	0	0	0	NA	NA	Strep. parasanguinis
group_21151	0	0	0	NA	NA	Strep. parasanguinis
group_21150	0	0	0	NA	NA	Strep. parasanguinis
cdaR~~~ybbR	0	0	0	NA	NA	Strep. parasanguinis
group_21142	0	0	0	NA	NA	Strep. parasanguinis
group_21138	0	0	0	NA	NA	Strep. parasanguinis
group_21134	0	0	0	NA	NA	Strep. parasanguinis
group_21110	0	0	0	NA	NA	Strep. parasanguinis
group_21106	0	0	0	NA	NA	Strep. parasanguinis
group_21093	0	0	0	NA	NA	Strep. parasanguinis
group_21092	0	0	0	NA	NA	Strep. parasanguinis
group_21077	0	0	0	NA	NA	Strep. parasanguinis
celA~~~comEA	0	0	0	NA	NA	Strep. parasanguinis
group_21052	0	0	0	NA	NA	Strep. parasanguinis
group_21049	0	0	0	NA	NA	Strep. parasanguinis
group_21048	0	0	0	NA	NA	Strep. parasanguinis
group_21046	0	0	0	NA	NA	Strep. parasanguinis
group_21043	0	0	0	NA	NA	Strep. parasanguinis
group_21026	0	0	0	NA	NA	Strep. parasanguinis
group_21014	0	0	0	NA	NA	Strep. parasanguinis
group_21000	0	0	0	NA	NA	Strep. parasanguinis
group_20992	0	0	0	NA	NA	Strep. parasanguinis
group_20987	0	0	0	NA	NA	Strep. parasanguinis
ybiV	0	0	0	NA	NA	Strep. parasanguinis
group_20984	0	0	0	NA	NA	Strep. parasanguinis
group_20979	0	0	0	NA	NA	Strep. parasanguinis
group_20968	0	0	0	NA	NA	Strep. parasanguinis
group_20967	0	0	0	NA	NA	Strep. parasanguinis
group_20964	0	0	0	NA	NA	Strep. parasanguinis
group_20959	0	0	0	NA	NA	Strep. parasanguinis
group_20941	0	0	0	NA	NA	Strep. parasanguinis
yjjP	0	0	0	NA	NA	Strep. parasanguinis
group_20874	0	0	0	NA	NA	Strep. parasanguinis
group_20869	0	0	0	NA	NA	Strep. parasanguinis
group_20866	0	0	0	NA	NA	Strep. parasanguinis
group_20837	0	0	0	NA	NA	Strep. parasanguinis
gor	0	0	0	NA	NA	Strep. parasanguinis
group_20817	0	0	0	NA	NA	Strep. parasanguinis
group_20810	0	0	0	NA	NA	Strep. parasanguinis
group_20782	0	0	0	NA	NA	Strep. parasanguinis
group_20765	0	0	0	NA	NA	Strep. parasanguinis
group_20755	0	0	0	NA	NA	Strep. parasanguinis
group_20749	0	0	0	NA	NA	Strep. parasanguinis
group_20726	0	0	0	NA	NA	Strep. parasanguinis
group_20725	0	0	0	NA	NA	Strep. parasanguinis
group_20706	0	0	0	NA	NA	Strep. parasanguinis
tPR	0	0	0	NA	NA	Strep. parasanguinis
group_20688	0	0	0	NA	NA	Strep. parasanguinis
folK~~~folB	0	0	0	NA	NA	Strep. parasanguinis
albF~~~pqqL	0	0	0	NA	NA	Strep. parasanguinis
group_20657	0	0	0	NA	NA	Strep. parasanguinis
yidC2~~~yidC	0	0	0	NA	NA	Strep. parasanguinis
group_20640	0	0	0	NA	NA	Strep. parasanguinis
group_20622	0	0	0	NA	NA	Strep. parasanguinis
group_20621	0	0	0	NA	NA	Strep. parasanguinis
thrE~~~yjjB	0	0	0	NA	NA	Strep. parasanguinis
group_20610	0	0	0	NA	NA	Strep. parasanguinis
group_20598	0	0	0	NA	NA	Strep. parasanguinis
group_20567	0	0	0	NA	NA	Strep. parasanguinis
group_20560	0	0	0	NA	NA	Strep. parasanguinis
group_20527	0	0	0	NA	NA	Strep. parasanguinis
group_20520	0	0	0	NA	NA	Strep. parasanguinis
group_20449	0	0	0	NA	NA	Strep. parasanguinis
group_20443	0	0	0	NA	NA	Strep. parasanguinis
group_20438	0	0	0	NA	NA	Strep. parasanguinis
group_20428	0	0	0	NA	NA	Strep. parasanguinis
ncl1~~~rsmF	0	0	0	NA	NA	Strep. parasanguinis
group_20390	0	0	0	NA	NA	Strep. parasanguinis
group_20389	0	0	0	NA	NA	Strep. parasanguinis
lolE~~~lolC	0	0	0	NA	NA	Strep. parasanguinis
group_20333	0	0	0	NA	NA	Strep. parasanguinis
natB	0	0	0	NA	NA	Strep. parasanguinis
group_20313	0	0	0	NA	NA	Strep. parasanguinis
group_20302	0	0	0	NA	NA	Strep. parasanguinis
group_20298	0	0	0	NA	NA	Strep. parasanguinis
exp8	0	0	0	NA	NA	Strep. parasanguinis
group_20297	0	0	0	NA	NA	Strep. parasanguinis
group_20278	0	0	0	NA	NA	Strep. parasanguinis
group_20256	0	0	0	NA	NA	Strep. parasanguinis
group_20248	0	0	0	NA	NA	Strep. parasanguinis
albE~~~pqqL	0	0	0	NA	NA	Strep. parasanguinis
jag~~~khpB	0	0	0	NA	NA	Strep. parasanguinis
group_20185	0	0	0	NA	NA	Strep. parasanguinis
group_20145	0	0	0	NA	NA	Strep. parasanguinis
group_20140	0	0	0	NA	NA	Strep. parasanguinis
group_20135	0	0	0	NA	NA	Strep. parasanguinis
group_20125	0	0	0	NA	NA	Strep. parasanguinis
group_20096	0	0	0	NA	NA	Strep. parasanguinis
ycjS~~~mviM	0	0	0	NA	NA	Strep. parasanguinis
group_20035	0	0	0	NA	NA	Strep. parasanguinis
group_20000	0	0	0	NA	NA	Strep. parasanguinis
group_19958	0	0	0	NA	NA	Strep. parasanguinis
group_19874	0	0	0	NA	NA	Strep. parasanguinis
group_19845	0	0	0	NA	NA	Strep. parasanguinis
group_19814	0	0	0	NA	NA	Strep. parasanguinis
group_19785	0	0	0	NA	NA	Strep. parasanguinis
group_19748	0	0	0	NA	NA	Strep. parasanguinis
group_19747	0	0	0	NA	NA	Strep. parasanguinis
vncR~~~regX3	0	0	0	NA	NA	Strep. parasanguinis
group_19720	0	0	0	NA	NA	Strep. parasanguinis
ccrZ	0	0	0	NA	NA	Strep. parasanguinis
group_19681	0	0	0	NA	NA	Strep. parasanguinis
exoY~~~wcaJ	0	0	0	NA	NA	Strep. parasanguinis
group_19657	0	0	0	NA	NA	Strep. parasanguinis
dnaB~~~dnaD	0	0	0	NA	NA	Strep. parasanguinis
group_19609	0	0	0	NA	NA	Strep. parasanguinis
group_19579	0	0	0	NA	NA	Strep. parasanguinis
group_19578	0	0	0	NA	NA	Strep. parasanguinis
group_19560	0	0	0	NA	NA	Strep. parasanguinis
group_19541	0	0	0	NA	NA	Strep. parasanguinis
group_19512	0	0	0	NA	NA	Strep. parasanguinis
group_19492	0	0	0	NA	NA	Strep. parasanguinis
group_19466	0	0	0	NA	NA	Strep. parasanguinis
group_19443	0	0	0	NA	NA	Strep. parasanguinis
group_19366	0	0	0	NA	NA	Strep. parasanguinis
group_19363	0	0	0	NA	NA	Strep. parasanguinis
group_19354	0	0	0	NA	NA	Strep. parasanguinis
group_19350	0	0	0	NA	NA	Strep. parasanguinis
group_19087	0	0	0	NA	NA	Strep. parasanguinis
group_18992	0	0	0	NA	NA	Strep. parasanguinis
group_18895	0	0	0	NA	NA	Strep. parasanguinis
group_18861	0	0	0	NA	NA	Strep. parasanguinis
group_18844	0	0	0	NA	NA	Strep. parasanguinis
group_18843	0	0	0	NA	NA	Strep. parasanguinis
group_18726	0	0	0	NA	NA	Strep. parasanguinis
vncS~~~walK	0	0	0	NA	NA	Strep. parasanguinis
group_18648	0	0	0	NA	NA	Strep. parasanguinis
group_18646	0	0	0	NA	NA	Strep. parasanguinis
group_18645	0	0	0	NA	NA	Strep. parasanguinis
group_18628	0	0	0	NA	NA	Strep. parasanguinis
group_18601	0	0	0	NA	NA	Strep. parasanguinis
dhfR	0	0	0	NA	NA	Strep. parasanguinis
wecE	0	0	0	NA	NA	Strep. parasanguinis
group_18590	0	0	0	NA	NA	Strep. parasanguinis
group_18540	0	0	0	NA	NA	Strep. parasanguinis
group_18539	0	0	0	NA	NA	Strep. parasanguinis
group_18530	0	0	0	NA	NA	Strep. parasanguinis
group_18465	0	0	0	NA	NA	Strep. parasanguinis
rlmN~~~vanZ	0	0	0	NA	NA	Strep. parasanguinis
group_18344	0	0	0	NA	NA	Strep. parasanguinis
group_18306	0	0	0	NA	NA	Strep. parasanguinis
group_18287	0	0	0	NA	NA	Strep. parasanguinis
group_18274	0	0	0	NA	NA	Strep. parasanguinis
group_18229	0	0	0	NA	NA	Strep. parasanguinis
group_18032	0	0	0	NA	NA	Strep. parasanguinis
group_17624	0	0	0	NA	NA	Strep. parasanguinis
group_17456	0	0	0	NA	NA	Strep. parasanguinis
group_17300	0	0	0	NA	NA	Strep. parasanguinis
group_17218	0	0	0	NA	NA	Strep. parasanguinis
group_17195	0	0	0	NA	NA	Strep. parasanguinis
group_17130	0	0	0	NA	NA	Strep. parasanguinis
group_17110	0	0	0	NA	NA	Strep. parasanguinis
group_16962	0	0	0	NA	NA	Strep. parasanguinis
group_16931	0	0	0	NA	NA	Strep. parasanguinis
group_16929	0	0	0	NA	NA	Strep. parasanguinis
group_16840	0	0	0	NA	NA	Strep. parasanguinis
group_16824	0	0	0	NA	NA	Strep. parasanguinis
group_16754	0	0	0	NA	NA	Strep. parasanguinis
group_16740	0	0	0	NA	NA	Strep. parasanguinis
group_16640	0	0	0	NA	NA	Strep. parasanguinis
group_16466	0	0	0	NA	NA	Strep. parasanguinis
group_16339	0	0	0	NA	NA	Strep. parasanguinis
group_3729	0	0	0	NA	NA	Strep. parasanguinis
group_3004	1	1	0	NA	NA	Strep. parasanguinis
group_2782	0	0	0	NA	NA	Strep. parasanguinis
comGA~~~comGB	0	0	0	NA	NA	Strep. parasanguinis
licC	0	0	0	NA	NA	Strep. parasanguinis
rhaT~~~licB	0	0	0	NA	NA	Strep. parasanguinis
cotS~~~licA	0	0	0	NA	NA	Strep. parasanguinis
tarJ	0	0	0	NA	NA	Strep. parasanguinis
tarI	0	0	0	NA	NA	Strep. parasanguinis
group_2621	0	0	0	NA	NA	Strep. parasanguinis
group_2502	0	0	0	NA	NA	Strep. parasanguinis
glpG	0	0	0	NA	NA	Strep. parasanguinis
lytT	0	0	0	NA	NA	Strep. parasanguinis
group_2480	0	0	0	NA	NA	Strep. parasanguinis
fAU1	0	0	0	NA	NA	Strep. parasanguinis
thiD	0	0	0	NA	NA	Strep. parasanguinis
group_2426	0	0	0	NA	NA	Strep. parasanguinis
group_2425	0	0	0	NA	NA	Strep. parasanguinis
group_2416	0	0	0	NA	NA	Strep. parasanguinis
pgpB	0	0	0	NA	NA	Strep. parasanguinis
eamA~~~rhaT	0	0	0	NA	NA	Strep. parasanguinis
comGF~~~comGG	0	0	0	NA	NA	Strep. parasanguinis
group_2309	0	0	0	NA	NA	Strep. parasanguinis
dadA	0	0	0	NA	NA	Strep. parasanguinis
fieF~~~mntE	0	0	0	NA	NA	Strep. parasanguinis
nIF3	0	0	0	NA	NA	Strep. parasanguinis
comGD	0	0	0	NA	NA	Strep. parasanguinis
hinT	0	0	0	NA	NA	Strep. parasanguinis
group_2145	0	0	0	NA	NA	Strep. parasanguinis
comGC	0	0	0	NA	NA	Strep. parasanguinis
dnaG	0	0	0	NA	NA	Strep. parasanguinis
trmK	0	0	0	NA	NA	Strep. parasanguinis
group_2043	0	0	0	NA	NA	Strep. parasanguinis
group_2036	0	0	0	NA	NA	Strep. parasanguinis
rfaL	0	0	0	NA	NA	Strep. parasanguinis
aroK	0	0	0	NA	NA	Strep. parasanguinis
psr	0	0	0	NA	NA	Strep. parasanguinis
group_1975	0	0	0	NA	NA	Strep. parasanguinis
group_1962	0	0	0	NA	NA	Strep. parasanguinis
phnK	0	0	0	NA	NA	Strep. parasanguinis
group_1879	0	0	0	NA	NA	Strep. parasanguinis
group_1878	0	0	0	NA	NA	Strep. parasanguinis
rpoD	0	0	0	NA	NA	Strep. parasanguinis
trpX	0	0	0	NA	NA	Strep. parasanguinis
dnaQ~~~dinG~~~polC	0	0	0	NA	NA	Strep. parasanguinis
group_1824	0	0	0	NA	NA	Strep. parasanguinis
ftsA	0	0	0	NA	NA	Strep. parasanguinis
group_1709	0	0	0	NA	NA	Strep. parasanguinis
group_1656	0	0	0	NA	NA	Strep. parasanguinis
group_1655	0	0	0	NA	NA	Strep. parasanguinis
ehuA	0	0	0	NA	NA	Strep. parasanguinis
group_1641	0	0	0	NA	NA	Strep. parasanguinis
group_1571	0	0	0	NA	NA	Strep. parasanguinis
yitT	0	0	0	NA	NA	Strep. parasanguinis
ftsW	0	0	0	NA	NA	Strep. parasanguinis
cpoA	0	0	0	NA	NA	Strep. parasanguinis
group_1525	0	0	0	NA	NA	Strep. parasanguinis
pbp2X~~~ftsI	0	0	0	NA	NA	Strep. parasanguinis
thrB	0	0	0	NA	NA	Strep. parasanguinis
group_1479	0	0	0	NA	NA	Strep. parasanguinis
prsA	0	0	0	NA	NA	Strep. parasanguinis
thrA	0	0	0	NA	NA	Strep. parasanguinis
trmR	0	0	0	NA	NA	Strep. parasanguinis
pyrK	0	0	0	NA	NA	Strep. parasanguinis
pgdA	0	0	0	NA	NA	Strep. parasanguinis
group_1409	0	0	0	NA	NA	Strep. parasanguinis
group_1352	0	0	0	NA	NA	Strep. parasanguinis
group_1319	1	0.25	0.75	0.333333	1	Strep. parasanguinis
group_1259	0	0	0	NA	NA	Strep. parasanguinis
yggS	0	0	0	NA	NA	Strep. parasanguinis
group_1233	0	0.25	0.25	1	1	Strep. parasanguinis
sarA	0	0	0	NA	NA	Strep. parasanguinis
tlpA~~~resA~~~bcp	0	0	0	NA	NA	Strep. parasanguinis
obgE	0	0	0	NA	NA	Strep. parasanguinis
group_1113	0	0	0	NA	NA	Strep. parasanguinis
sepF	0	0	0	NA	NA	Strep. parasanguinis
ddl	0	0	0	NA	NA	Strep. parasanguinis
murF	0	0	0	NA	NA	Strep. parasanguinis
group_1022	0	0	0	NA	NA	Strep. parasanguinis
group_959	0	0	0	NA	NA	Strep. parasanguinis
group_957	0	0	0	NA	NA	Strep. parasanguinis
cynX	0	0	0	NA	NA	Strep. parasanguinis
ywnH~~~rimL	0	0	0	NA	NA	Strep. parasanguinis
pbp1a	0	0	0	NA	NA	Strep. parasanguinis
recU	0	0	0	NA	NA	Strep. parasanguinis
ybdK	0	0	0	NA	NA	Strep. parasanguinis
group_791	0	0	0	NA	NA	Strep. parasanguinis
greA	0	0	0	NA	NA	Strep. parasanguinis
mltG	0	0	0	NA	NA	Strep. parasanguinis
pulA	0	0	0	NA	NA	Strep. parasanguinis
flaA1	0	0	0	NA	NA	Strep. parasanguinis
gpsB	0	0	0	NA	NA	Strep. parasanguinis
yoqJ	0	0	0	NA	NA	Strep. parasanguinis
gph	0	0	0	NA	NA	Strep. parasanguinis
hepA	0	0	0	NA	NA	Strep. parasanguinis
rimI~~~yhbS	0	0	0	NA	NA	Strep. parasanguinis
group_421	0	0	0	NA	NA	Strep. parasanguinis
group_317	0	0	0	NA	NA	Strep. parasanguinis
niaX	0	0	0	NA	NA	Strep. parasanguinis
group_205	0	0	0	NA	NA	Strep. parasanguinis
ywlG	0	0	0	NA	NA	Strep. parasanguinis
lysM~~~lytE	0	0	0	NA	NA	Strep. parasanguinis
pabB	0	0	0	NA	NA	Strep. parasanguinis
murC	0	0	0	NA	NA	Strep. parasanguinis
purE	1	1	0	NA	NA	Strep. parasanguinis
yqgV	0	0	0	NA	NA	Strep. parasanguinis
group_21745	0	0	0	NA	NA	Strep. parasanguinis
group_21529	1	1	0	NA	NA	Strep. parasanguinis
comD~~~yesM~~~dcuS	0	0	0	NA	NA	Strep. parasanguinis
group_20975	0	0	0	NA	NA	Strep. parasanguinis
group_20912	0	0	0	NA	NA	Strep. parasanguinis
btuD	0	0	0	NA	NA	Strep. parasanguinis
group_20897	0	0	0	NA	NA	Strep. parasanguinis
group_20691	0	0	0	NA	NA	Strep. parasanguinis
group_20595	0	0	0	NA	NA	Strep. parasanguinis
ysdA	0	0	0	NA	NA	Strep. parasanguinis
group_20289	0	0	0	NA	NA	Strep. parasanguinis
group_20134	0	0	0	NA	NA	Strep. parasanguinis
group_20113	0	0	0	NA	NA	Strep. parasanguinis
group_19784	0	0	0	NA	NA	Strep. parasanguinis
group_19660	0	0	0	NA	NA	Strep. parasanguinis
group_19659	0	0	0	NA	NA	Strep. parasanguinis
group_19639	0	0	0	NA	NA	Strep. parasanguinis
group_19343	0	0	0	NA	NA	Strep. parasanguinis
group_19342	0	0	0	NA	NA	Strep. parasanguinis
group_19341	0	0	0	NA	NA	Strep. parasanguinis
group_19309	0	0	0	NA	NA	Strep. parasanguinis
group_19017	0	0	0	NA	NA	Strep. parasanguinis
group_18701	0	0	0	NA	NA	Strep. parasanguinis
group_18594	0	0	0	NA	NA	Strep. parasanguinis
group_18114	0	0	0	NA	NA	Strep. parasanguinis
group_18111	0	0	0	NA	NA	Strep. parasanguinis
group_17366	0	0	0	NA	NA	Strep. parasanguinis
impB	1	0.75	0.25	1	1	Strep. parasanguinis
cynT	0	0	0	NA	NA	Strep. parasanguinis
group_2881	0	0	0	NA	NA	Strep. parasanguinis
tatA	1	1	0	NA	NA	Strep. parasanguinis
sdpR~~~arsR	1	0.875	0.125	1	1	Strep. parasanguinis
ydhC~~~pmrA	0	0	0	NA	NA	Strep. parasanguinis
rimL	0	0	0	NA	NA	Strep. parasanguinis
pulO~~~pppA	0	0	0	NA	NA	Strep. parasanguinis
group_1408	0	0	0	NA	NA	Strep. parasanguinis
alr	0	0	0	NA	NA	Strep. parasanguinis
group_21386	0	0	0	NA	NA	Strep. parasanguinis
group_21236	0	0	0	NA	NA	Strep. parasanguinis
group_21180	0	0	0	NA	NA	Strep. parasanguinis
group_21113	0	0	0	NA	NA	Strep. parasanguinis
cbpF~~~cbpJ	0	0	0	NA	NA	Strep. parasanguinis
group_20999	0	0	0	NA	NA	Strep. parasanguinis
group_20924	0	0	0	NA	NA	Strep. parasanguinis
group_20377	1	0	1	0.111111	1	Strep. parasanguinis
crcB~~~fluC	1	0	1	0.111111	1	Strep. parasanguinis
group_19734	0	0	0	NA	NA	Strep. parasanguinis
group_7052	1	1	0	NA	NA	Strep. parasanguinis
group_2848	0	0.375	0.375	1	1	Strep. parasanguinis
group_2669	1	1	0	NA	NA	Strep. parasanguinis
group_2664	0	0	0	NA	NA	Strep. parasanguinis
efeU	1	1	0	NA	NA	Strep. parasanguinis
whiA	1	1	0	NA	NA	Strep. parasanguinis
group_2599	1	1	0	NA	NA	Strep. parasanguinis
group_2577	1	1	0	NA	NA	Strep. parasanguinis
group_2570	1	1	0	NA	NA	Strep. parasanguinis
yesN	0	0	0	NA	NA	Strep. parasanguinis
group_2548	1	1	0	NA	NA	Strep. parasanguinis
group_2255	1	0.25	0.75	0.333333	1	Strep. parasanguinis
pncA	1	1	0	NA	NA	Strep. parasanguinis
comA~~~pncF	0	0	0	NA	NA	Strep. parasanguinis
group_21200	0	0	0	NA	NA	Strep. parasanguinis
group_21004	0	0	0	NA	NA	Strep. parasanguinis
group_19475	0	0	0	NA	NA	Strep. parasanguinis
group_2871	0	0.375	0.375	1	1	Strep. parasanguinis
ccpN	0	0.375	0.375	1	1	Strep. parasanguinis
ssuD	0	0	0	NA	NA	Strep. parasanguinis
efeB	1	1	0	NA	NA	Strep. parasanguinis
ypdA~~~yesM	0	0	0	NA	NA	Strep. parasanguinis
yesL	0	0	0	NA	NA	Strep. parasanguinis
group_1868	0	0	0	NA	NA	Strep. parasanguinis
amsE	0	0	0	NA	NA	Strep. parasanguinis
group_477	0	0	0	NA	NA	Strep. parasanguinis
group_21776	0	0	0	NA	NA	Strep. parasanguinis
group_20132	0	0	0	NA	NA	Strep. parasanguinis
cadD	0	0.75	0.75	0.333333	1	Strep. parasanguinis
group_3038	0	0.125	0.125	1	1	Strep. parasanguinis
glpO	0	0.125	0.125	1	1	Strep. parasanguinis
nudI	0	0.375	0.375	1	1	Strep. parasanguinis
group_2583	0	0	0	NA	NA	Strep. parasanguinis
holB	0	0	0	NA	NA	Strep. parasanguinis
group_2350	0	0	0	NA	NA	Strep. parasanguinis
mdlB~~~yheH	0	0	0	NA	NA	Strep. parasanguinis
group_1407	0	0	0	NA	NA	Strep. parasanguinis
ecfA1	0	0	0	NA	NA	Strep. parasanguinis
cpsC	0	0	0	NA	NA	Strep. parasanguinis
isaA~~~lysM	1	1	0	NA	NA	Strep. parasanguinis
group_20566	0	0.125	0.125	1	1	Strep. parasanguinis
group_19558	0	0.25	0.25	1	1	Strep. parasanguinis
group_19175	0	0	0	NA	NA	Strep. parasanguinis
group_2899	0	0	0	NA	NA	Strep. parasanguinis
fbp	0	0.375	0.375	1	1	Strep. parasanguinis
group_2744	0	0	0	NA	NA	Strep. parasanguinis
group_2670	1	1	0	NA	NA	Strep. parasanguinis
group_2663	1	1	0	NA	NA	Strep. parasanguinis
group_2660	1	1	0	NA	NA	Strep. parasanguinis
tatC	1	1	0	NA	NA	Strep. parasanguinis
group_2606	1	1	0	NA	NA	Strep. parasanguinis
group_2591	1	1	0	NA	NA	Strep. parasanguinis
group_2590	1	1	0	NA	NA	Strep. parasanguinis
group_2384	0	0	0	NA	NA	Strep. parasanguinis
group_1414	1	1	0	NA	NA	Strep. parasanguinis
stbD	1	1	0	NA	NA	Strep. parasanguinis
slmA~~~tetR	1	1	0	NA	NA	Strep. parasanguinis
ybgA	0	0	0	NA	NA	Strep. parasanguinis
glgP	0	0	0	NA	NA	Strep. parasanguinis
comF~~~comFC	0	0	0	NA	NA	Strep. parasanguinis
group_20880	0	0	0	NA	NA	Strep. parasanguinis
group_20744	0	0	0	NA	NA	Strep. parasanguinis
group_18238	0	0	0	NA	NA	Strep. parasanguinis
group_17139	0	0	0	NA	NA	Strep. parasanguinis
group_16215	1	1	0	NA	NA	Strep. parasanguinis
group_16186	1	1	0	NA	NA	Strep. parasanguinis
group_16142	1	1	0	NA	NA	Strep. parasanguinis
group_15793	1	1	0	NA	NA	Strep. parasanguinis
group_15676	0	0	0	NA	NA	Strep. parasanguinis
yjbJ	1	0.125	0.875	0.222222	1	Strep. parasanguinis
dnaX	1	1	0	NA	NA	Strep. parasanguinis
group_2969	1	1	0	NA	NA	Strep. parasanguinis
csbD	1	0.125	0.875	0.222222	1	Strep. parasanguinis
acuI~~~yhfP	0	0	0	NA	NA	Strep. parasanguinis
wcaA	0	0	0	NA	NA	Strep. parasanguinis
group_2345	0	0	0	NA	NA	Strep. parasanguinis
group_1558	1	1	0	NA	NA	Strep. parasanguinis
group_1545	0	0	0	NA	NA	Strep. parasanguinis
group_1331	0	0	0	NA	NA	Strep. parasanguinis
group_1262	0	0	0	NA	NA	Strep. parasanguinis
argR	0	0	0	NA	NA	Strep. parasanguinis
group_20617	0	0	0	NA	NA	Strep. parasanguinis
group_20432	0	0	0	NA	NA	Strep. parasanguinis
group_19790	0	0	0	NA	NA	Strep. parasanguinis
group_7095	1	1	0	NA	NA	Strep. parasanguinis
fruA~~~luxR	1	1	0	NA	NA	Strep. parasanguinis
group_3074	1	1	0	NA	NA	Strep. parasanguinis
group_3050	1	1	0	NA	NA	Strep. parasanguinis
group_3049	1	1	0	NA	NA	Strep. parasanguinis
group_2839	0	0	0	NA	NA	Strep. parasanguinis
group_2795	0	0	0	NA	NA	Strep. parasanguinis
group_2652	0	0	0	NA	NA	Strep. parasanguinis
group_2523	1	1	0	NA	NA	Strep. parasanguinis
galE	0	0.25	0.25	1	1	Strep. parasanguinis
group_1128	0	0	0	NA	NA	Strep. parasanguinis
group_921	0	0	0	NA	NA	Strep. parasanguinis
group_731	0	0	0	NA	NA	Strep. parasanguinis
group_21653	0	0	0	NA	NA	Strep. parasanguinis
group_21224	0	0	0	NA	NA	Strep. parasanguinis
group_20898	0	0	0	NA	NA	Strep. parasanguinis
group_20748	0	0	0	NA	NA	Strep. parasanguinis
group_20386	0	0	0	NA	NA	Strep. parasanguinis
group_20242	0	0	0	NA	NA	Strep. parasanguinis
degV~~~trmH	0	0	0	NA	NA	Strep. parasanguinis
group_7139	0	0	0	NA	NA	Strep. parasanguinis
group_6891	0	0	0	NA	NA	Strep. parasanguinis
group_3129	0	0	0	NA	NA	Strep. parasanguinis
group_3128	0	0	0	NA	NA	Strep. parasanguinis
group_2960	0	0	0	NA	NA	Strep. parasanguinis
nagB	0	0	0	NA	NA	Strep. parasanguinis
group_2865	0	0	0	NA	NA	Strep. parasanguinis
group_2756	0	0.5	0.5	1	1	Strep. parasanguinis
group_2716	0	0	0	NA	NA	Strep. parasanguinis
group_2708	0	0	0	NA	NA	Strep. parasanguinis
group_2526	0	0	0	NA	NA	Strep. parasanguinis
group_2525	0	0	0	NA	NA	Strep. parasanguinis
hisM~~~glnM	0	0	0	NA	NA	Strep. parasanguinis
phoP	0	0	0	NA	NA	Strep. parasanguinis
prmC	0	0	0	NA	NA	Strep. parasanguinis
group_2461	0	0	0	NA	NA	Strep. parasanguinis
group_2282	0	0	0	NA	NA	Strep. parasanguinis
group_2236	0	0	0	NA	NA	Strep. parasanguinis
coaE	0	0	0	NA	NA	Strep. parasanguinis
group_1966	0	0	0	NA	NA	Strep. parasanguinis
group_1945	0	0	0	NA	NA	Strep. parasanguinis
group_1933	0	0	0	NA	NA	Strep. parasanguinis
group_1826	0	0	0	NA	NA	Strep. parasanguinis
group_1580	1	1	0	NA	NA	Strep. parasanguinis
albF	0	0	0	NA	NA	Strep. parasanguinis
group_1318	0	0	0	NA	NA	Strep. parasanguinis
yidC	0	0	0	NA	NA	Strep. parasanguinis
group_1291	1	0.5	0.5	1	1	Strep. parasanguinis
group_1245	0	0	0	NA	NA	Strep. parasanguinis
aF2118	0	0.375	0.375	1	1	Strep. parasanguinis
group_264	0	0	0	NA	NA	Strep. parasanguinis
citS~~~yesM	0	0	0	NA	NA	Strep. parasanguinis
group_21347	0	0	0	NA	NA	Strep. parasanguinis
group_21204	0	0	0	NA	NA	Strep. parasanguinis
group_19254	0	0	0	NA	NA	Strep. parasanguinis
group_18734	0	0	0	NA	NA	Strep. parasanguinis
group_3084	1	0.125	0.875	0.222222	1	Strep. parasanguinis
group_2951	1	0.75	0.25	1	1	Strep. parasanguinis
group_2827	0	0	0	NA	NA	Strep. parasanguinis
group_2796	0	0.125	0.125	1	1	Strep. parasanguinis
group_2775	0	0	0	NA	NA	Strep. parasanguinis
recX	0	0	0	NA	NA	Strep. parasanguinis
group_2468	0	0	0	NA	NA	Strep. parasanguinis
group_2379	0	0.125	0.125	1	1	Strep. parasanguinis
group_2361	0	0	0	NA	NA	Strep. parasanguinis
group_2321	0	0	0	NA	NA	Strep. parasanguinis
group_2260	0	0	0	NA	NA	Strep. parasanguinis
group_2238	0	0	0	NA	NA	Strep. parasanguinis
group_2237	0	0	0	NA	NA	Strep. parasanguinis
group_2195	0	0	0	NA	NA	Strep. parasanguinis
group_2194	0	0.625	0.625	0.444444	1	Strep. parasanguinis
group_2044	0	0	0	NA	NA	Strep. parasanguinis
coaB	0	0	0	NA	NA	Strep. parasanguinis
lacC~~~pfkB~~~lacC1	1	1	0	NA	NA	Strep. parasanguinis
ywpJ	0	0	0	NA	NA	Strep. parasanguinis
group_1460	0	0	0	NA	NA	Strep. parasanguinis
group_1027	0	0	0	NA	NA	Strep. parasanguinis
group_224	0	0	0	NA	NA	Strep. parasanguinis
yxdM	0	0	0	NA	NA	Strep. parasanguinis
aliA	0	0	0	NA	NA	Strep. parasanguinis
group_18297	0	0	0	NA	NA	Strep. parasanguinis
group_7099	0	0	0	NA	NA	Strep. parasanguinis
group_3102	0	0	0	NA	NA	Strep. parasanguinis
ybhL	0	0	0	NA	NA	Strep. parasanguinis
group_3101	0	0	0	NA	NA	Strep. parasanguinis
group_3100	0	0	0	NA	NA	Strep. parasanguinis
group_3091	0	0	0	NA	NA	Strep. parasanguinis
mhqR~~~marR	0	0	0	NA	NA	Strep. parasanguinis
group_2961	0	0	0	NA	NA	Strep. parasanguinis
nagD	1	1	0	NA	NA	Strep. parasanguinis
group_2852	1	1	0	NA	NA	Strep. parasanguinis
group_2657	0	0	0	NA	NA	Strep. parasanguinis
group_2641	0	0	0	NA	NA	Strep. parasanguinis
trhO	1	1	0	NA	NA	Strep. parasanguinis
group_2472	0	0	0	NA	NA	Strep. parasanguinis
group_2370	1	1	0	NA	NA	Strep. parasanguinis
group_2319	0	0	0	NA	NA	Strep. parasanguinis
group_2125	0	0	0	NA	NA	Strep. parasanguinis
group_1590	0	0	0	NA	NA	Strep. parasanguinis
group_1549	1	0.75	0.25	1	1	Strep. parasanguinis
lacA	1	0.75	0.25	1	1	Strep. parasanguinis
group_20518	0	0	0	NA	NA	Strep. parasanguinis
group_3047	1	1	0	NA	NA	Strep. parasanguinis
group_2858	0	0	0	NA	NA	Strep. parasanguinis
group_2779	0	0	0	NA	NA	Strep. parasanguinis
group_2707	0	0	0	NA	NA	Strep. parasanguinis
group_2701	0	0	0	NA	NA	Strep. parasanguinis
group_2478	0	0	0	NA	NA	Strep. parasanguinis
group_2447	0	0	0	NA	NA	Strep. parasanguinis
bglG~~~licT	0	0	0	NA	NA	Strep. parasanguinis
group_2202	0	0	0	NA	NA	Strep. parasanguinis
group_275	1	1	0	NA	NA	Strep. parasanguinis
group_68	0	0.25	0.25	1	1	Strep. parasanguinis
aprE	0	0	0	NA	NA	Strep. parasanguinis
group_21624	0	0	0	NA	NA	Strep. parasanguinis
group_21443	0	0	0	NA	NA	Strep. parasanguinis
group_21378	0	0	0	NA	NA	Strep. parasanguinis
group_21329	0	0	0	NA	NA	Strep. parasanguinis
group_21310	0	0	0	NA	NA	Strep. parasanguinis
group_21240	0	0	0	NA	NA	Strep. parasanguinis
group_21122	0	0	0	NA	NA	Strep. parasanguinis
group_21057	0	0	0	NA	NA	Strep. parasanguinis
group_20793	0	0	0	NA	NA	Strep. parasanguinis
group_20774	0	0	0	NA	NA	Strep. parasanguinis
group_20689	0	0	0	NA	NA	Strep. parasanguinis
nspC	0	0	0	NA	NA	Strep. parasanguinis
aguB	0	0	0	NA	NA	Strep. parasanguinis
group_20316	0	0	0	NA	NA	Strep. parasanguinis
group_20206	0	0	0	NA	NA	Strep. parasanguinis
lys9	0	0	0	NA	NA	Strep. parasanguinis
group_19696	0	0	0	NA	NA	Strep. parasanguinis
group_18930	0	0	0	NA	NA	Strep. parasanguinis
yehU~~~yesM	0	0	0	NA	NA	Strep. parasanguinis
group_18366	0	0	0	NA	NA	Strep. parasanguinis
speE	0	0	0	NA	NA	Strep. parasanguinis
group_18137	0	0	0	NA	NA	Strep. parasanguinis
group_3059	0	0	0	NA	NA	Strep. parasanguinis
ndk	0	0	0	NA	NA	Strep. parasanguinis
group_3026	0	0	0	NA	NA	Strep. parasanguinis
fucO~~~gldA	0	0.25	0.25	1	1	Strep. parasanguinis
group_2947	0	0	0	NA	NA	Strep. parasanguinis
group_2659	0	0	0	NA	NA	Strep. parasanguinis
group_2254	0	0.125	0.125	1	1	Strep. parasanguinis
gpmB2	0	0	0	NA	NA	Strep. parasanguinis
tdh	0	0	0	NA	NA	Strep. parasanguinis
group_1258	0	0.375	0.375	1	1	Strep. parasanguinis
group_1033	1	1	0	NA	NA	Strep. parasanguinis
ylmH	0	0	0	NA	NA	Strep. parasanguinis
coiA	0	0	0	NA	NA	Strep. parasanguinis
group_338	1	1	0	NA	NA	Strep. parasanguinis
group_21741	0	0	0	NA	NA	Strep. parasanguinis
group_21175	0	0	0	NA	NA	Strep. parasanguinis
gtcA~~~gtrA	0	0	0	NA	NA	Strep. parasanguinis
group_20901	0	0	0	NA	NA	Strep. parasanguinis
group_20334	0	0	0	NA	NA	Strep. parasanguinis
group_20243	0	0	0	NA	NA	Strep. parasanguinis
group_20174	0	0	0	NA	NA	Strep. parasanguinis
group_19362	0	0	0	NA	NA	Strep. parasanguinis
group_18056	0	0	0	NA	NA	Strep. parasanguinis
group_3099	0	0	0	NA	NA	Strep. parasanguinis
group_2987	1	0.75	0.25	1	1	Strep. parasanguinis
ahpC	0	0	0	NA	NA	Strep. parasanguinis
group_2266	0	0	0	NA	NA	Strep. parasanguinis
yfgQ	0	0	0	NA	NA	Strep. parasanguinis
group_1458	1	0.5	0.5	1	1	Strep. parasanguinis
rodZ	0	0	0	NA	NA	Strep. parasanguinis
group_898	0	0	0	NA	NA	Strep. parasanguinis
lepB	0	0	0	NA	NA	Strep. parasanguinis
group_18900	1	1	0	NA	NA	Strep. parasanguinis
group_16420	0	0	0	NA	NA	Strep. parasanguinis
group_3093	0	0	0	NA	NA	Strep. parasanguinis
group_3065	1	0.125	0.875	0.222222	1	Strep. parasanguinis
aIM24	0	0	0	NA	NA	Strep. parasanguinis
group_2634	0	0	0	NA	NA	Strep. parasanguinis
rpiR	0	0	0	NA	NA	Strep. parasanguinis
group_2245	0	0	0	NA	NA	Strep. parasanguinis
group_2103	0	0.125	0.125	1	1	Strep. parasanguinis
yetF	0	0	0	NA	NA	Strep. parasanguinis
group_1767	0	0	0	NA	NA	Strep. parasanguinis
group_1635	1	0.25	0.75	0.333333	1	Strep. parasanguinis
group_1511	0	0	0	NA	NA	Strep. parasanguinis
blpZ	0	0	0	NA	NA	Strep. parasanguinis
group_624	1	1	0	NA	NA	Strep. parasanguinis
group_21789	0	0.125	0.125	1	1	Strep. parasanguinis
group_21552	0	0	0	NA	NA	Strep. parasanguinis
group_19719	0	0	0	NA	NA	Strep. parasanguinis
group_19079	0	0	0	NA	NA	Strep. parasanguinis
group_18140	0	0	0	NA	NA	Strep. parasanguinis
bglB	0	0	0	NA	NA	Strep. parasanguinis
group_2702	0	0.5	0.5	1	1	Strep. parasanguinis
group_2365	0	0	0	NA	NA	Strep. parasanguinis
group_1513	0	0	0	NA	NA	Strep. parasanguinis
thiW	0	0.125	0.125	1	1	Strep. parasanguinis
tenA	0	0.125	0.125	1	1	Strep. parasanguinis
thiM~~~thiM2	0	0.125	0.125	1	1	Strep. parasanguinis
thiE~~~thiE2	0	0.125	0.125	1	1	Strep. parasanguinis
group_780	0	0.125	0.125	1	1	Strep. parasanguinis
ccmA	0	0.125	0.125	1	1	Strep. parasanguinis
group_452	0	0	0	NA	NA	Strep. parasanguinis
ykoE	0	0.125	0.125	1	1	Strep. parasanguinis
blpL	0	0	0	NA	NA	Strep. parasanguinis
group_20853	0	0	0	NA	NA	Strep. parasanguinis
group_12316	0	0.25	0.25	1	1	Strep. parasanguinis
group_6989	0	0	0	NA	NA	Strep. parasanguinis
group_2955	0	0.375	0.375	1	1	Strep. parasanguinis
group_2953	0	0	0	NA	NA	Strep. parasanguinis
yjjG~~~pynA~~~yigB	0	0	0	NA	NA	Strep. parasanguinis
group_2375	1	0.25	0.75	0.333333	1	Strep. parasanguinis
group_2031	0	0	0	NA	NA	Strep. parasanguinis
group_1889	1	1	0	NA	NA	Strep. parasanguinis
group_1888	1	1	0	NA	NA	Strep. parasanguinis
group_1887	1	1	0	NA	NA	Strep. parasanguinis
tcyN~~~glnQ	1	0.875	0.125	1	1	Strep. parasanguinis
group_1886	1	1	0	NA	NA	Strep. parasanguinis
group_1561	1	1	0	NA	NA	Strep. parasanguinis
group_1509	1	0.375	0.625	0.444444	1	Strep. parasanguinis
group_1333	1	0.625	0.375	1	1	Strep. parasanguinis
group_171	0	0	0	NA	NA	Strep. parasanguinis
group_141	0	0	0	NA	NA	Strep. parasanguinis
sigW	0	0	0	NA	NA	Strep. parasanguinis
group_21465	0	0	0	NA	NA	Strep. parasanguinis
group_21146	0	0	0	NA	NA	Strep. parasanguinis
group_21036	0	0	0	NA	NA	Strep. parasanguinis
group_20524	0	0.375	0.375	1	1	Strep. parasanguinis
group_20470	0	0	0	NA	NA	Strep. parasanguinis
group_20004	0	0.375	0.375	1	1	Strep. parasanguinis
group_19842	0	0.25	0.25	1	1	Strep. parasanguinis
group_16447	0	0	0	NA	NA	Strep. parasanguinis
group_2982	0	0.375	0.375	1	1	Strep. parasanguinis
group_2856	0	0.375	0.375	1	1	Strep. parasanguinis
ybaN	0	0	0	NA	NA	Strep. parasanguinis
group_2510	0	0.625	0.625	0.444444	1	Strep. parasanguinis
group_2169	0	0	0	NA	NA	Strep. parasanguinis
mutT~~~yjhB	0	0.5	0.5	1	1	Strep. parasanguinis
group_21682	0	0.5	0.5	1	1	Strep. parasanguinis
group_21603	0	0	0	NA	NA	Strep. parasanguinis
group_21081	0	0.375	0.375	1	1	Strep. parasanguinis
group_2895	0	0	0	NA	NA	Strep. parasanguinis
group_2834	0	0.625	0.625	0.444444	1	Strep. parasanguinis
group_2647	0	0	0	NA	NA	Strep. parasanguinis
phnC	1	0.5	0.5	1	1	Strep. parasanguinis
group_2476	0	0	0	NA	NA	Strep. parasanguinis
rpmG	1	0.625	0.375	1	1	Strep. parasanguinis
group_2006	0	0.375	0.375	1	1	Strep. parasanguinis
mviN	0	0	0	NA	NA	Strep. parasanguinis
group_1024	0	0	0	NA	NA	Strep. parasanguinis
padR	1	1	0	NA	NA	Strep. parasanguinis
group_350	0	0.75	0.75	0.333333	1	Strep. parasanguinis
group_21765	0	0	0	NA	NA	Strep. parasanguinis
group_21094	0	0	0	NA	NA	Strep. parasanguinis
group_20884	0	0.25	0.25	1	1	Strep. parasanguinis
group_20870	0	0.375	0.375	1	1	Strep. parasanguinis
group_20852	0	0	0	NA	NA	Strep. parasanguinis
group_20690	0	0	0	NA	NA	Strep. parasanguinis
group_20550	0	0.25	0.25	1	1	Strep. parasanguinis
group_18109	0	0.25	0.25	1	1	Strep. parasanguinis
acpA	0	0	0	NA	NA	Strep. parasanguinis
group_2925	0	0	0	NA	NA	Strep. parasanguinis
group_2800	0	0	0	NA	NA	Strep. parasanguinis
group_2604	0	0	0	NA	NA	Strep. parasanguinis
group_2407	0	0	0	NA	NA	Strep. parasanguinis
proX	1	1	0	NA	NA	Strep. parasanguinis
scpC	1	1	0	NA	NA	Strep. parasanguinis
group_2124	0	0	0	NA	NA	Strep. parasanguinis
group_2114	0	0	0	NA	NA	Strep. parasanguinis
group_1985	0	0.5	0.5	1	1	Strep. parasanguinis
group_1713	0	0.25	0.25	1	1	Strep. parasanguinis
group_1683	0	0.25	0.25	1	1	Strep. parasanguinis
group_1675	0	0	0	NA	NA	Strep. parasanguinis
jag	0	0	0	NA	NA	Strep. parasanguinis
icd	0	0	0	NA	NA	Strep. parasanguinis
group_1200	0	0	0	NA	NA	Strep. parasanguinis
group_1199	0	0	0	NA	NA	Strep. parasanguinis
yaaA	0	0	0	NA	NA	Strep. parasanguinis
group_1102	0	0	0	NA	NA	Strep. parasanguinis
group_945	0	0	0	NA	NA	Strep. parasanguinis
sfcA	0	0.25	0.25	1	1	Strep. parasanguinis
group_527	0	0	0	NA	NA	Strep. parasanguinis
wefK~~~yiaH	0	0	0	NA	NA	Strep. parasanguinis
group_163	0	0	0	NA	NA	Strep. parasanguinis
traX	0	0	0	NA	NA	Strep. parasanguinis
group_52	1	1	0	NA	NA	Strep. parasanguinis
group_20824	0	0	0	NA	NA	Strep. parasanguinis
group_20585	0	0.25	0.25	1	1	Strep. parasanguinis
group_20471	0	0	0	NA	NA	Strep. parasanguinis
nlpC	0	0.25	0.25	1	1	Strep. parasanguinis
group_19411	0	0	0	NA	NA	Strep. parasanguinis
group_19340	0	0.25	0.25	1	1	Strep. parasanguinis
group_19306	0	0.25	0.25	1	1	Strep. parasanguinis
group_19305	0	0.25	0.25	1	1	Strep. parasanguinis
group_19047	0	0.25	0.25	1	1	Strep. parasanguinis
group_18024	0	0.25	0.25	1	1	Strep. parasanguinis
group_16429	0	0	0	NA	NA	Strep. parasanguinis
group_16187	1	1	0	NA	NA	Strep. parasanguinis
group_15537	0	0.25	0.25	1	1	Strep. parasanguinis
group_15535	0	0.25	0.25	1	1	Strep. parasanguinis
group_15532	0	0.25	0.25	1	1	Strep. parasanguinis
group_6977	0	0	0	NA	NA	Strep. parasanguinis
group_2873	0	0	0	NA	NA	Strep. parasanguinis
group_2746	0	0	0	NA	NA	Strep. parasanguinis
group_2519	0	0.25	0.25	1	1	Strep. parasanguinis
group_2515	0	0	0	NA	NA	Strep. parasanguinis
group_2493	0	0	0	NA	NA	Strep. parasanguinis
group_2344	0	0	0	NA	NA	Strep. parasanguinis
rfbD	0	0	0	NA	NA	Strep. parasanguinis
group_2283	0	0	0	NA	NA	Strep. parasanguinis
group_1674	0	0	0	NA	NA	Strep. parasanguinis
group_1614	0	0.25	0.25	1	1	Strep. parasanguinis
group_1569	1	1	0	NA	NA	Strep. parasanguinis
yjhB	0	0	0	NA	NA	Strep. parasanguinis
int	0	0.25	0.25	1	1	Strep. parasanguinis
group_754	0	0	0	NA	NA	Strep. parasanguinis
xis	0	0.25	0.25	1	1	Strep. parasanguinis
group_722	0	0.25	0.25	1	1	Strep. parasanguinis
hsdM	0	0.375	0.375	1	1	Strep. parasanguinis
rpoE	0	0.25	0.25	1	1	Strep. parasanguinis
hipB~~~xRE	0	0.25	0.25	1	1	Strep. parasanguinis
group_396	1	1	0	NA	NA	Strep. parasanguinis
tetM~~~tetM	0	0.25	0.25	1	1	Strep. parasanguinis
yabE	0	0	0	NA	NA	Strep. parasanguinis
group_21402	1	1	0	NA	NA	Strep. parasanguinis
group_21148	0	0	0	NA	NA	Strep. parasanguinis
group_18345	0	0	0	NA	NA	Strep. parasanguinis
group_18280	0	0.125	0.125	1	1	Strep. parasanguinis
group_18092	0	0	0	NA	NA	Strep. parasanguinis
group_16297	1	1	0	NA	NA	Strep. parasanguinis
group_3110	0	0	0	NA	NA	Strep. parasanguinis
group_3105	0	0	0	NA	NA	Strep. parasanguinis
group_3085	0	0	0	NA	NA	Strep. parasanguinis
group_3041	1	1	0	NA	NA	Strep. parasanguinis
group_3040	1	1	0	NA	NA	Strep. parasanguinis
group_2989	1	1	0	NA	NA	Strep. parasanguinis
pknB	1	1	0	NA	NA	Strep. parasanguinis
group_2696	1	1	0	NA	NA	Strep. parasanguinis
rsmB~~~nusB	1	1	0	NA	NA	Strep. parasanguinis
group_2695	1	1	0	NA	NA	Strep. parasanguinis
group_2694	1	1	0	NA	NA	Strep. parasanguinis
group_2693	1	1	0	NA	NA	Strep. parasanguinis
group_2692	1	1	0	NA	NA	Strep. parasanguinis
trxB	1	1	0	NA	NA	Strep. parasanguinis
glnQ~~~yxeN	1	1	0	NA	NA	Strep. parasanguinis
group_2600	1	1	0	NA	NA	Strep. parasanguinis
obgE~~~cgtA	1	1	0	NA	NA	Strep. parasanguinis
group_2518	1	1	0	NA	NA	Strep. parasanguinis
degV	1	1	0	NA	NA	Strep. parasanguinis
dapB	1	1	0	NA	NA	Strep. parasanguinis
cca	1	1	0	NA	NA	Strep. parasanguinis
group_2331	1	1	0	NA	NA	Strep. parasanguinis
yxeP	1	1	0	NA	NA	Strep. parasanguinis
tcyA	1	1	0	NA	NA	Strep. parasanguinis
ydhF	0	0	0	NA	NA	Strep. parasanguinis
group_2037	1	0.625	0.375	1	1	Strep. parasanguinis
group_1909	0	0	0	NA	NA	Strep. parasanguinis
group_1907	1	0.625	0.375	1	1	Strep. parasanguinis
group_1659	1	1	0	NA	NA	Strep. parasanguinis
group_1550	0	0.75	0.75	0.333333	1	Strep. parasanguinis
sepM	1	1	0	NA	NA	Strep. parasanguinis
group_1517	1	1	0	NA	NA	Strep. parasanguinis
rlmN	1	1	0	NA	NA	Strep. parasanguinis
coaD	1	1	0	NA	NA	Strep. parasanguinis
rsmD	1	1	0	NA	NA	Strep. parasanguinis
group_1235	0	0.375	0.375	1	1	Strep. parasanguinis
trpB	1	1	0	NA	NA	Strep. parasanguinis
group_1100	0	0	0	NA	NA	Strep. parasanguinis
group_688	0	0	0	NA	NA	Strep. parasanguinis
group_233	0	0.375	0.375	1	1	Strep. parasanguinis
hemW	0	0	0	NA	NA	Strep. parasanguinis
group_20784	0	0	0	NA	NA	Strep. parasanguinis
group_20485	0	0.25	0.25	1	1	Strep. parasanguinis
strH	0	0	0	NA	NA	Strep. parasanguinis
group_20392	0	0	0	NA	NA	Strep. parasanguinis
group_20367	0	0	0	NA	NA	Strep. parasanguinis
group_20310	0	0.875	0.875	0.222222	1	Strep. parasanguinis
group_19943	0	0.25	0.25	1	1	Strep. parasanguinis
group_19586	1	1	0	NA	NA	Strep. parasanguinis
pcp	0	0	0	NA	NA	Strep. parasanguinis
group_19027	0	0.75	0.75	0.333333	1	Strep. parasanguinis
group_16854	0	0	0	NA	NA	Strep. parasanguinis
group_16652	0	0	0	NA	NA	Strep. parasanguinis
group_3123	0	0	0	NA	NA	Strep. parasanguinis
group_3089	0	0	0	NA	NA	Strep. parasanguinis
gorA	1	1	0	NA	NA	Strep. parasanguinis
group_2893	1	1	0	NA	NA	Strep. parasanguinis
group_2887	0	0	0	NA	NA	Strep. parasanguinis
group_2698	1	1	0	NA	NA	Strep. parasanguinis
group_2697	1	1	0	NA	NA	Strep. parasanguinis
liaR~~~vraR	1	1	0	NA	NA	Strep. parasanguinis
group_2691	1	1	0	NA	NA	Strep. parasanguinis
group_2690	1	1	0	NA	NA	Strep. parasanguinis
group_2689	1	1	0	NA	NA	Strep. parasanguinis
group_2688	1	1	0	NA	NA	Strep. parasanguinis
group_2687	1	1	0	NA	NA	Strep. parasanguinis
yspA	1	1	0	NA	NA	Strep. parasanguinis
group_2685	1	1	0	NA	NA	Strep. parasanguinis
pepC	1	1	0	NA	NA	Strep. parasanguinis
nadE	1	1	0	NA	NA	Strep. parasanguinis
pncB	1	1	0	NA	NA	Strep. parasanguinis
group_2571	1	1	0	NA	NA	Strep. parasanguinis
group_2327	0	0	0	NA	NA	Strep. parasanguinis
group_2166	0	0	0	NA	NA	Strep. parasanguinis
amiA	0	0	0	NA	NA	Strep. parasanguinis
group_1924	1	0.75	0.25	1	1	Strep. parasanguinis
group_1823	1	1	0	NA	NA	Strep. parasanguinis
group_1820	1	1	0	NA	NA	Strep. parasanguinis
group_1681	0	0.125	0.125	1	1	Strep. parasanguinis
group_1661	0	0	0	NA	NA	Strep. parasanguinis
gldA	1	1	0	NA	NA	Strep. parasanguinis
repB	0	0.5	0.5	1	1	Strep. parasanguinis
group_1528	0	0	0	NA	NA	Strep. parasanguinis
group_1482	1	0.375	0.625	0.444444	1	Strep. parasanguinis
ftsZ	1	1	0	NA	NA	Strep. parasanguinis
group_1129	0	0	0	NA	NA	Strep. parasanguinis
glnQ	0	0	0	NA	NA	Strep. parasanguinis
group_1111	0	0	0	NA	NA	Strep. parasanguinis
glnH	0	0	0	NA	NA	Strep. parasanguinis
hisM	0	0	0	NA	NA	Strep. parasanguinis
group_714	0	0	0	NA	NA	Strep. parasanguinis
group_180	0	0	0	NA	NA	Strep. parasanguinis
pynA~~~yigB~~~yjjG~~~yfnB	0	0	0	NA	NA	Strep. parasanguinis
group_21696	0	0	0	NA	NA	Strep. parasanguinis
group_21574	1	1	0	NA	NA	Strep. parasanguinis
group_21239	0	0	0	NA	NA	Strep. parasanguinis
group_20646	0	0	0	NA	NA	Strep. parasanguinis
group_20573	0	0	0	NA	NA	Strep. parasanguinis
group_20568	0	0.25	0.25	1	1	Strep. parasanguinis
group_20306	0	0	0	NA	NA	Strep. parasanguinis
group_20095	0	0	0	NA	NA	Strep. parasanguinis
group_20068	0	0.25	0.25	1	1	Strep. parasanguinis
group_19996	0	0	0	NA	NA	Strep. parasanguinis
group_19942	0	0.25	0.25	1	1	Strep. parasanguinis
group_19618	0	0	0	NA	NA	Strep. parasanguinis
group_19310	0	0.25	0.25	1	1	Strep. parasanguinis
group_19299	0	0	0	NA	NA	Strep. parasanguinis
group_19261	0	0.25	0.25	1	1	Strep. parasanguinis
speK	0	0	0	NA	NA	Strep. parasanguinis
group_18508	0	0	0	NA	NA	Strep. parasanguinis
group_18034	0	0.25	0.25	1	1	Strep. parasanguinis
mobT	0	0.25	0.25	1	1	Strep. parasanguinis
group_17931	0	0.25	0.25	1	1	Strep. parasanguinis
group_17039	0	0	0	NA	NA	Strep. parasanguinis
group_16743	0	0	0	NA	NA	Strep. parasanguinis
group_15605	0	0.25	0.25	1	1	Strep. parasanguinis
group_13516	0	0.25	0.25	1	1	Strep. parasanguinis
group_3090	1	1	0	NA	NA	Strep. parasanguinis
group_3039	1	1	0	NA	NA	Strep. parasanguinis
group_2983	1	1	0	NA	NA	Strep. parasanguinis
hydD~~~bpoC	1	1	0	NA	NA	Strep. parasanguinis
group_2911	0	0	0	NA	NA	Strep. parasanguinis
group_2700	1	1	0	NA	NA	Strep. parasanguinis
yigZ	1	1	0	NA	NA	Strep. parasanguinis
group_2699	1	1	0	NA	NA	Strep. parasanguinis
ypeA	0	0	0	NA	NA	Strep. parasanguinis
yghU	1	1	0	NA	NA	Strep. parasanguinis
group_2503	0	0	0	NA	NA	Strep. parasanguinis
group_1870	1	1	0	NA	NA	Strep. parasanguinis
trkH	1	1	0	NA	NA	Strep. parasanguinis
group_1522	0	0	0	NA	NA	Strep. parasanguinis
tagG	0	0.625	0.625	0.444444	1	Strep. parasanguinis
lacB	0	0	0	NA	NA	Strep. parasanguinis
lexA	1	1	0	NA	NA	Strep. parasanguinis
umuC	1	1	0	NA	NA	Strep. parasanguinis
group_1025	0	0	0	NA	NA	Strep. parasanguinis
drrB	1	0.5	0.5	1	1	Strep. parasanguinis
tetR~~~rutR	1	0.5	0.5	1	1	Strep. parasanguinis
dhaL	0	0	0	NA	NA	Strep. parasanguinis
dhaK	0	0	0	NA	NA	Strep. parasanguinis
hutH	1	1	0	NA	NA	Strep. parasanguinis
steT	1	1	0	NA	NA	Strep. parasanguinis
hutI	1	1	0	NA	NA	Strep. parasanguinis
group_719	0	0.25	0.25	1	1	Strep. parasanguinis
fhs1	1	1	0	NA	NA	Strep. parasanguinis
group_697	1	1	0	NA	NA	Strep. parasanguinis
hutU	1	1	0	NA	NA	Strep. parasanguinis
group_586	0	0.25	0.25	1	1	Strep. parasanguinis
ftcD	1	1	0	NA	NA	Strep. parasanguinis
group_123	1	1	0	NA	NA	Strep. parasanguinis
group_116	1	1	0	NA	NA	Strep. parasanguinis
group_51	0	0	0	NA	NA	Strep. parasanguinis
group_21791	0	0	0	NA	NA	Strep. parasanguinis
group_21785	0	0	0	NA	NA	Strep. parasanguinis
group_21738	0	0	0	NA	NA	Strep. parasanguinis
group_21733	1	0.625	0.375	1	1	Strep. parasanguinis
group_21708	0	0	0	NA	NA	Strep. parasanguinis
group_21694	0	0	0	NA	NA	Strep. parasanguinis
group_21591	0	0	0	NA	NA	Strep. parasanguinis
group_21504	0	0	0	NA	NA	Strep. parasanguinis
group_21502	0	0	0	NA	NA	Strep. parasanguinis
group_21496	0	0	0	NA	NA	Strep. parasanguinis
[truncated: 63,537 more rows]

## Sheet: enrichment_direction
Supplementary Table 3: Tumour-specific vs oral-specific genes
Gene	Tumour-specific	Oral-specific	Direction
ssb	2	0	Tumour-enriched
pncA	0	6	Oral-enriched
msbA	0	5	Oral-enriched
wchO	0	5	Oral-enriched
aF2118	0	4	Oral-enriched
ccoS	0	4	Oral-enriched
hsdM	0	4	Oral-enriched
traE~~~virB4	2	0	Tumour-enriched
hxlR	0	4	Oral-enriched
phnC	0	4	Oral-enriched
putP	0	4	Oral-enriched
apeA	0	3	Oral-enriched
arsC	0	3	Oral-enriched
bioY	0	3	Oral-enriched
cas1	0	3	Oral-enriched
cas2	0	3	Oral-enriched
cpsO~~~epsJ	0	3	Oral-enriched
csn2	0	3	Oral-enriched
draG	0	3	Oral-enriched
drrB	0	3	Oral-enriched
efeB	0	3	Oral-enriched
efeO	0	3	Oral-enriched
efeU	0	3	Oral-enriched
fucO~~~gldA	0	3	Oral-enriched
hsdD	0	3	Oral-enriched
iga~~~zmpB	0	3	Oral-enriched
marC	0	3	Oral-enriched
mutT~~~yjhB	0	3	Oral-enriched
pezA	0	3	Oral-enriched
rhuM	0	3	Oral-enriched
stbD	0	3	Oral-enriched
tatA	0	3	Oral-enriched
traG~~~virD4	2	0	Tumour-enriched
tatC	0	3	Oral-enriched
tetR~~~rutR	0	3	Oral-enriched
wcwK~~~cpsJ	2	0	Tumour-enriched
treC	0	3	Oral-enriched
yozG	2	0	Tumour-enriched
wchP	0	3	Oral-enriched
wecB	0	3	Oral-enriched
ydaF~~~rimL	0	3	Oral-enriched
aF0785	1	0	Tumour-enriched
ydeA	0	3	Oral-enriched
acpA	1	0	Tumour-enriched
ykoT	0	3	Oral-enriched
aac6	0	2	Oral-enriched
accC	0	2	Oral-enriched
acpA~~~acpB	0	2	Oral-enriched
aguA	0	2	Oral-enriched
araD	0	2	Oral-enriched
arcA	0	2	Oral-enriched
arcC	0	2	Oral-enriched
argF	0	2	Oral-enriched
asbA	0	2	Oral-enriched
asp3	0	2	Oral-enriched
bceA	0	2	Oral-enriched
blpL	0	2	Oral-enriched
blpS~~~lytR~~~lytT	0	2	Oral-enriched
blpY	0	2	Oral-enriched
ccpN	0	2	Oral-enriched
celA	0	2	Oral-enriched
celC	0	2	Oral-enriched
comR	0	2	Oral-enriched
cysA	0	2	Oral-enriched
deoR~~~ulaR~~~glpR	0	2	Oral-enriched
entS	0	2	Oral-enriched
epsJ~~~wcaA	0	2	Oral-enriched
fbp	0	2	Oral-enriched
fer	0	2	Oral-enriched
fsa	0	2	Oral-enriched
gldA	0	2	Oral-enriched
glf	0	2	Oral-enriched
gloA	0	2	Oral-enriched
glvR	0	2	Oral-enriched
hemH	0	2	Oral-enriched
immA	0	2	Oral-enriched
irrE~~~immA	0	2	Oral-enriched
liaR~~~luxR	0	2	Oral-enriched
licD~~~licD2	0	2	Oral-enriched
lptC	0	2	Oral-enriched
macB	0	2	Oral-enriched
atoS	1	0	Tumour-enriched
marR~~~mgrA	0	2	Oral-enriched
marR~~~slyA	0	2	Oral-enriched
matE	0	2	Oral-enriched
mepB	0	2	Oral-enriched
merR	0	2	Oral-enriched
mobC	0	2	Oral-enriched
mobV	0	2	Oral-enriched
nurA	0	2	Oral-enriched
pblB	0	2	Oral-enriched
proX	0	2	Oral-enriched
prtR	0	2	Oral-enriched
pssD	0	2	Oral-enriched
ptcA	0	2	Oral-enriched
relE	0	2	Oral-enriched
repA	0	2	Oral-enriched
rggC~~~mutR	0	2	Oral-enriched
ribA	0	2	Oral-enriched
ribD	0	2	Oral-enriched
ribE	0	2	Oral-enriched
rutF	0	2	Oral-enriched
scpC	0	2	Oral-enriched
sgaU	0	2	Oral-enriched
slhC	0	2	Oral-enriched
srlA	0	2	Oral-enriched
srlB	0	2	Oral-enriched
srlE	0	2	Oral-enriched
tacF	0	2	Oral-enriched
tagG	0	2	Oral-enriched
tcpE	0	2	Oral-enriched
tfoX	0	2	Oral-enriched
thsA~~~abpK	0	2	Oral-enriched
thsB	0	2	Oral-enriched
tnp~~~repB~~~repX	0	2	Oral-enriched
tnp~~~tnpA	0	2	Oral-enriched
tnp~~~tra5	0	2	Oral-enriched
tra5~~~tnp	0	2	Oral-enriched
traG	0	2	Oral-enriched
traG~~~herA	0	2	Oral-enriched
treR~~~gntR	0	2	Oral-enriched
udg4	0	2	Oral-enriched
ulaG	0	2	Oral-enriched
wefK~~~yiaH	0	2	Oral-enriched
ybhR	0	2	Oral-enriched
ydeE	0	2	Oral-enriched
bglG~~~licT	1	0	Tumour-enriched
yeeA	0	2	Oral-enriched
yfcC~~~arcD	0	2	Oral-enriched
yjcQ	0	2	Oral-enriched
yjjG~~~pynA~~~yigB	0	2	Oral-enriched
ytfG~~~nmrA	0	2	Oral-enriched
yttP	0	2	Oral-enriched
aIM24	0	1	Oral-enriched
abiF	0	1	Oral-enriched
abiV	0	1	Oral-enriched
acrIIA6	0	1	Oral-enriched
acrR	0	1	Oral-enriched
acrR~~~tetR	0	1	Oral-enriched
adaA	0	1	Oral-enriched
bhtF	1	0	Tumour-enriched
afuA	0	1	Oral-enriched
aliA~~~sarA~~~oppA	0	1	Oral-enriched
aph3IIIa	0	1	Oral-enriched
araC	0	1	Oral-enriched
ardA	0	1	Oral-enriched
argR	0	1	Oral-enriched
arlR	0	1	Oral-enriched
arpU	0	1	Oral-enriched
asp1	0	1	Oral-enriched
asp2	0	1	Oral-enriched
bet	0	1	Oral-enriched
bgrS	0	1	Oral-enriched
bioF	0	1	Oral-enriched
blpA	0	1	Oral-enriched
blpI	0	1	Oral-enriched
blpO	0	1	Oral-enriched
blpR	0	1	Oral-enriched
briC	0	1	Oral-enriched
capD	0	1	Oral-enriched
cas10	0	1	Oral-enriched
cas1c	0	1	Oral-enriched
cas3	0	1	Oral-enriched
cas4	0	1	Oral-enriched
cas5c	0	1	Oral-enriched
cas6	0	1	Oral-enriched
cas7c	0	1	Oral-enriched
cas8c	0	1	Oral-enriched
cbbX	0	1	Oral-enriched
cbpC	0	1	Oral-enriched
cbrC	0	1	Oral-enriched
ccmA	0	1	Oral-enriched
cdiI	0	1	Oral-enriched
celC~~~bigG	0	1	Oral-enriched
chaP	0	1	Oral-enriched
cibA	0	1	Oral-enriched
cibB	0	1	Oral-enriched
citA	0	1	Oral-enriched
citS~~~yesM	0	1	Oral-enriched
blpC	1	0	Tumour-enriched
clpC	0	1	Oral-enriched
cmr4	0	1	Oral-enriched
comC	0	1	Oral-enriched
comX2	0	1	Oral-enriched
copY	0	1	Oral-enriched
cotH	0	1	Oral-enriched
cpsD	0	1	Oral-enriched
cpsD~~~mrp	0	1	Oral-enriched
cpsE~~~wcaJ~~~epsL	0	1	Oral-enriched
cpsI	0	1	Oral-enriched
cpsJ	0	1	Oral-enriched
csm4	0	1	Oral-enriched
blpJ	1	0	Tumour-enriched
csm6	0	1	Oral-enriched
csoR	0	1	Oral-enriched
cutC	0	1	Oral-enriched
cutD	0	1	Oral-enriched
cynT	0	1	Oral-enriched
czcD	0	1	Oral-enriched
dcm	0	1	Oral-enriched
degA	0	1	Oral-enriched
comX2~~~comX1	1	0	Tumour-enriched
epsF	1	0	Tumour-enriched
deoR	0	1	Oral-enriched
dexB	0	1	Oral-enriched
dhaK~~~dhaQ	0	1	Oral-enriched
dinF	0	1	Oral-enriched
dltB	0	1	Oral-enriched
dltD	0	1	Oral-enriched
dpnA	0	1	Oral-enriched
dpnD	0	1	Oral-enriched
dpnM	0	1	Oral-enriched
dtd	0	1	Oral-enriched
eamA	0	1	Oral-enriched
eamA~~~yicL	0	1	Oral-enriched
ebhA	0	1	Oral-enriched
ecfT~~~mtsC~~~cbiQ	0	1	Oral-enriched
ecsC	0	1	Oral-enriched
engA	0	1	Oral-enriched
epsB	0	1	Oral-enriched
epsE	0	1	Oral-enriched
epsG	0	1	Oral-enriched
epsH	0	1	Oral-enriched
epsJ	0	1	Oral-enriched
epsL	0	1	Oral-enriched
epsV	0	1	Oral-enriched
esaA	0	1	Oral-enriched
eutJ	0	1	Oral-enriched
eutM	0	1	Oral-enriched
eutN	0	1	Oral-enriched
eutQ	0	1	Oral-enriched
fIDO	0	1	Oral-enriched
fabD	0	1	Oral-enriched
fbpB	0	1	Oral-enriched
fctA	0	1	Oral-enriched
femB~~~fmhB	0	1	Oral-enriched
feoA	0	1	Oral-enriched
fimA	0	1	Oral-enriched
fimB	0	1	Oral-enriched
fimC	0	1	Oral-enriched
fliJ	0	1	Oral-enriched
fliS	0	1	Oral-enriched
fabZ~~~paaI	1	0	Tumour-enriched
fmhB	0	1	Oral-enriched
fmtA	0	1	Oral-enriched
ftsL	0	1	Oral-enriched
hsdR	1	0	Tumour-enriched
fucI	0	1	Oral-enriched
fucO	0	1	Oral-enriched
galE	0	1	Oral-enriched
galT	0	1	Oral-enriched
glpE	0	1	Oral-enriched
glpO	0	1	Oral-enriched
glyP~~~alsT	0	1	Oral-enriched
gmuD	0	1	Oral-enriched
gntX	0	1	Oral-enriched
gsiA	0	1	Oral-enriched
gumP	0	1	Oral-enriched
khpB	1	0	Tumour-enriched
herA	0	1	Oral-enriched
hetN	0	1	Oral-enriched
hicB	0	1	Oral-enriched
hmuU	0	1	Oral-enriched
hxsD	0	1	Oral-enriched
hydD	0	1	Oral-enriched
insH~~~tnp	0	1	Oral-enriched
irrE	0	1	Oral-enriched
iscR	0	1	Oral-enriched
ispD	0	1	Oral-enriched
kcsA	0	1	Oral-enriched
kdgR	0	1	Oral-enriched
kwcM	0	1	Oral-enriched
lacA	0	1	Oral-enriched
lacC~~~pfkB~~~lacC1	0	1	Oral-enriched
lacE~~~celB	0	1	Oral-enriched
lacF	0	1	Oral-enriched
lacG	0	1	Oral-enriched
lacI~~~galR	0	1	Oral-enriched
lacT~~~bglG	0	1	Oral-enriched
licD	0	1	Oral-enriched
licD1	0	1	Oral-enriched
licD4~~~licD1	0	1	Oral-enriched
lisH	0	1	Oral-enriched
lnuC	0	1	Oral-enriched
lrgA	0	1	Oral-enriched
lsaC	0	1	Oral-enriched
ltaS	0	1	Oral-enriched
lctO	1	0	Tumour-enriched
lysR	0	1	Oral-enriched
lytB	0	1	Oral-enriched
macB~~~lolD	0	1	Oral-enriched
mazG	0	1	Oral-enriched
mdlB	0	1	Oral-enriched
mefA	0	1	Oral-enriched
levQ	1	0	Tumour-enriched
mepA	0	1	Oral-enriched
mutT	1	0	Tumour-enriched
nanE	1	0	Tumour-enriched
oorB	1	0	Tumour-enriched
merR~~~nmlR	0	1	Oral-enriched
metS	0	1	Oral-enriched
mntH	0	1	Oral-enriched
mobL	0	1	Oral-enriched
mraZ	0	1	Oral-enriched
msbA~~~mdlB	0	1	Oral-enriched
msrD	0	1	Oral-enriched
mtlA	0	1	Oral-enriched
mutE	0	1	Oral-enriched
mutG	0	1	Oral-enriched
psrA	1	0	Tumour-enriched
mutR	0	1	Oral-enriched
mviN	0	1	Oral-enriched
nanB	0	1	Oral-enriched
nanE1	0	1	Oral-enriched
natK	0	1	Oral-enriched
ndk	0	1	Oral-enriched
pynA~~~yigB~~~yjjG~~~yfnB	1	0	Tumour-enriched
nifJ	0	1	Oral-enriched
nisE	0	1	Oral-enriched
nisG	0	1	Oral-enriched
nisR	0	1	Oral-enriched
ntpC	0	1	Oral-enriched
ntpF	0	1	Oral-enriched
ompA	0	1	Oral-enriched
orfA	0	1	Oral-enriched
rbsC	1	0	Tumour-enriched
pacL	0	1	Oral-enriched
parB	0	1	Oral-enriched
pblA	0	1	Oral-enriched
rbsD	1	0	Tumour-enriched
pduC	0	1	Oral-enriched
pduD	0	1	Oral-enriched
pduH	0	1	Oral-enriched
pelF	0	1	Oral-enriched
pemK	0	1	Oral-enriched
pepF	0	1	Oral-enriched
pgmB	0	1	Oral-enriched
phoE	0	1	Oral-enriched
pitB	0	1	Oral-enriched
pksD	0	1	Oral-enriched
plcR	0	1	Oral-enriched
pmrA	0	1	Oral-enriched
pncM	0	1	Oral-enriched
pncT	0	1	Oral-enriched
pqqD	0	1	Oral-enriched
proC	0	1	Oral-enriched
psiE	0	1	Oral-enriched
pspC	0	1	Oral-enriched
ptsG2	0	1	Oral-enriched
purE	0	1	Oral-enriched
puuR	0	1	Oral-enriched
rbsK	1	0	Tumour-enriched
rfbX~~~matE	1	0	Tumour-enriched
rhaS	1	0	Tumour-enriched
racX	0	1	Oral-enriched
recD	0	1	Oral-enriched
regX3	0	1	Oral-enriched
relB	0	1	Oral-enriched
resA	0	1	Oral-enriched
rfbA	0	1	Oral-enriched
rpiR	1	0	Tumour-enriched
rfbB	0	1	Oral-enriched
rfbC	0	1	Oral-enriched
rseC	1	0	Tumour-enriched
rfbD	0	1	Oral-enriched
rgpF	0	1	Oral-enriched
rhaA	0	1	Oral-enriched
rhaB	0	1	Oral-enriched
rhaD	0	1	Oral-enriched
rhaR	0	1	Oral-enriched
ribF	0	1	Oral-enriched
soxR~~~merR~~~pmrA	1	0	Tumour-enriched
rinA	0	1	Oral-enriched
spaT	1	0	Tumour-enriched
rloB	0	1	Oral-enriched
spoIVCA	1	0	Tumour-enriched
rpiB	0	1	Oral-enriched
rplQ	0	1	Oral-enriched
rpmH	0	1	Oral-enriched
rr06~~~bgrR	0	1	Oral-enriched
rtgL	0	1	Oral-enriched
rumA	0	1	Oral-enriched
rusA	0	1	Oral-enriched
sapB	0	1	Oral-enriched
sapB~~~mgtC	0	1	Oral-enriched
sarA~~~aliA	0	1	Oral-enriched
sasA	0	1	Oral-enriched
sdpR~~~arsR	0	1	Oral-enriched
secC	0	1	Oral-enriched
secY2	0	1	Oral-enriched
sepS9	0	1	Oral-enriched
sfp	0	1	Oral-enriched
sinI	0	1	Oral-enriched
sinR	0	1	Oral-enriched
slc2	0	1	Oral-enriched
slhB	0	1	Oral-enriched
slhT	0	1	Oral-enriched
spoVK	0	1	Oral-enriched
spxB	0	1	Oral-enriched
stiP	1	0	Tumour-enriched
srtB	0	1	Oral-enriched
sstT	0	1	Oral-enriched
tcpE~~~prgI	1	0	Tumour-enriched
tagD	0	1	Oral-enriched
tcpC	0	1	Oral-enriched
telA	1	0	Tumour-enriched
tcyN~~~glnQ	0	1	Oral-enriched
tenA	0	1	Oral-enriched
tetL	0	1	Oral-enriched
tetO	0	1	Oral-enriched
tetR	0	1	Oral-enriched
tetW~~~tet32	0	1	Oral-enriched
terS	1	0	Tumour-enriched
thiE1~~~thiE	0	1	Oral-enriched
thiE~~~thiE2	0	1	Oral-enriched
thiF	0	1	Oral-enriched
thiM	0	1	Oral-enriched
thiM~~~thiM2	0	1	Oral-enriched
thiS	0	1	Oral-enriched
thiW	0	1	Oral-enriched
thsA	0	1	Oral-enriched
tipC	0	1	Oral-enriched
tnp	0	1	Oral-enriched
tnpA	0	1	Oral-enriched
tnp~~~insH	0	1	Oral-enriched
tonB	1	0	Tumour-enriched
trmFO	1	0	Tumour-enriched
traE	0	1	Oral-enriched
traM	0	1	Oral-enriched
trbC	0	1	Oral-enriched
wcwK	1	0	Tumour-enriched
trbL	0	1	Oral-enriched
trkH	0	1	Oral-enriched
tusA	0	1	Oral-enriched
ubiE	0	1	Oral-enriched
udp	0	1	Oral-enriched
vanW	0	1	Oral-enriched
virD2	0	1	Oral-enriched
wbbI	0	1	Oral-enriched
xerD~~~xerC	1	0	Tumour-enriched
wcaA	0	1	Oral-enriched
wchX	0	1	Oral-enriched
xerA	0	1	Oral-enriched
xkdM	0	1	Oral-enriched
xkdX	0	1	Oral-enriched
xylG	0	1	Oral-enriched
yabE	0	1	Oral-enriched
ybgA	0	1	Oral-enriched
ycaM	0	1	Oral-enriched
ycaO	0	1	Oral-enriched
yciW	0	1	Oral-enriched
yclQ	0	1	Oral-enriched
ydhC~~~pmrA	0	1	Oral-enriched
ydhF	0	1	Oral-enriched
ydjP	0	1	Oral-enriched
yecS~~~hisM	0	1	Oral-enriched
yeeF	0	1	Oral-enriched
yehT	0	1	Oral-enriched
yezG	0	1	Oral-enriched
yfbM	0	1	Oral-enriched
yhaQ	0	1	Oral-enriched
yidD	0	1	Oral-enriched
yjhB	0	1	Oral-enriched
yjjG	0	1	Oral-enriched
ykoE	0	1	Oral-enriched
yobL	0	1	Oral-enriched
ycfH	1	0	Tumour-enriched
yopX	1	0	Tumour-enriched
yohK~~~lrgB	0	1	Oral-enriched
yokF	0	1	Oral-enriched
yqcG	0	1	Oral-enriched
yqiK	0	1	Oral-enriched
yvbK	0	1	Oral-enriched
ywaC	0	1	Oral-enriched
ywnA	0	1	Oral-enriched
yxeA	1	0	Tumour-enriched
znuA	0	1	Oral-enriched
zorC	1	0	Tumour-enriched

## Sheet: location_species
Supplementary Table 4: Full enrichment statistics with raw counts
Gene	Tumour_Freq	Oral_Cavity_Freq	Freq_Diff	P_Value	P_Adjusted	Species	Tumour_Pos	Oral_Pos	Tumour_Total	Oral_Total	Enrichment
rpsJ	1	1	0	NA	NA	Strep. parasanguinis	1	8	1	8	Shared
rplX	1	1	0	NA	NA	Strep. parasanguinis	1	8	1	8	Shared
rplC	1	1	0	NA	NA	Strep. parasanguinis	1	8	1	8	Shared
rpmD	1	1	0	NA	NA	Strep. parasanguinis	1	8	1	8	Shared
rplN	1	1	0	NA	NA	Strep. parasanguinis	1	8	1	8	Shared
rplE	1	1	0	NA	NA	Strep. parasanguinis	1	8	1	8	Shared
rpsE	1	1	0	NA	NA	Strep. parasanguinis	1	8	1	8	Shared
rplD	1	1	0	NA	NA	Strep. parasanguinis	1	8	1	8	Shared
secY	1	1	0	NA	NA	Strep. parasanguinis	1	8	1	8	Shared
rpoA	1	1	0	NA	NA	Strep. parasanguinis	1	8	1	8	Shared
rplO	1	1	0	NA	NA	Strep. parasanguinis	1	8	1	8	Shared
rpsQ	1	1	0	NA	NA	Strep. parasanguinis	1	8	1	8	Shared
rpsH	1	1	0	NA	NA	Strep. parasanguinis	1	8	1	8	Shared
rplR	1	1	0	NA	NA	Strep. parasanguinis	1	8	1	8	Shared
rplW	1	1	0	NA	NA	Strep. parasanguinis	1	8	1	8	Shared
group_20010	1	1	0	NA	NA	Strep. parasanguinis	1	8	1	8	Shared
rpsK	1	1	0	NA	NA	Strep. parasanguinis	1	8	1	8	Shared
rpmC	1	1	0	NA	NA	Strep. parasanguinis	1	8	1	8	Shared
rpsC	1	1	0	NA	NA	Strep. parasanguinis	1	8	1	8	Shared
rplP	1	1	0	NA	NA	Strep. parasanguinis	1	8	1	8	Shared
rplF	1	1	0	NA	NA	Strep. parasanguinis	1	8	1	8	Shared
rplB	1	1	0	NA	NA	Strep. parasanguinis	1	8	1	8	Shared
rplV	1	1	0	NA	NA	Strep. parasanguinis	1	8	1	8	Shared
infA	1	1	0	NA	NA	Strep. parasanguinis	1	8	1	8	Shared
rpsM	1	1	0	NA	NA	Strep. parasanguinis	1	8	1	8	Shared
rpsS	1	1	0	NA	NA	Strep. parasanguinis	1	8	1	8	Shared
rpmJ	1	1	0	NA	NA	Strep. parasanguinis	1	8	1	8	Shared
gpsA	1	1	0	NA	NA	Strep. parasanguinis	1	8	1	8	Shared
galU	1	1	0	NA	NA	Strep. parasanguinis	1	8	1	8	Shared
group_21513	1	1	0	NA	NA	Strep. parasanguinis	1	8	1	8	Shared
yloV~~~dhaL	1	1	0	NA	NA	Strep. parasanguinis	1	8	1	8	Shared
group_20512	1	1	0	NA	NA	Strep. parasanguinis	1	8	1	8	Shared
group_20077	1	1	0	NA	NA	Strep. parasanguinis	1	8	1	8	Shared
group_19991	1	1	0	NA	NA	Strep. parasanguinis	1	8	1	8	Shared
group_19774	1	1	0	NA	NA	Strep. parasanguinis	1	8	1	8	Shared
group_19276	1	1	0	NA	NA	Strep. parasanguinis	1	8	1	8	Shared
group_17956	1	1	0	NA	NA	Strep. parasanguinis	1	8	1	8	Shared
purA	1	1	0	NA	NA	Strep. parasanguinis	1	8	1	8	Shared
murE~~~murT	1	1	0	NA	NA	Strep. parasanguinis	1	8	1	8	Shared
ptsH	1	1	0	NA	NA	Strep. parasanguinis	1	8	1	8	Shared
ptsI~~~ptsP	1	1	0	NA	NA	Strep. parasanguinis	1	8	1	8	Shared
cobQ~~~gatD	1	1	0	NA	NA	Strep. parasanguinis	1	8	1	8	Shared
nagE~~~exp5	1	1	0	NA	NA	Strep. parasanguinis	1	8	1	8	Shared
tsf~~~tnpB	1	1	0	NA	NA	Strep. parasanguinis	1	8	1	8	Shared
rpsB	1	1	0	NA	NA	Strep. parasanguinis	1	8	1	8	Shared
cmk	1	1	0	NA	NA	Strep. parasanguinis	1	8	1	8	Shared
ompR~~~graR	1	1	0	NA	NA	Strep. parasanguinis	1	8	1	8	Shared
tsaD	1	1	0	NA	NA	Strep. parasanguinis	1	8	1	8	Shared
endA	1	1	0	NA	NA	Strep. parasanguinis	1	8	1	8	Shared
manA	1	1	0	NA	NA	Strep. parasanguinis	1	8	1	8	Shared
rpoY	1	1	0	NA	NA	Strep. parasanguinis	1	8	1	8	Shared
rlmB~~~trmH	1	1	0	NA	NA	Strep. parasanguinis	1	8	1	8	Shared
murA	1	1	0	NA	NA	Strep. parasanguinis	1	8	1	8	Shared
fba	1	1	0	NA	NA	Strep. parasanguinis	1	8	1	8	Shared
rarA	1	1	0	NA	NA	Strep. parasanguinis	1	8	1	8	Shared
purC	1	1	0	NA	NA	Strep. parasanguinis	1	8	1	8	Shared
purL2	1	1	0	NA	NA	Strep. parasanguinis	1	8	1	8	Shared
purM	1	1	0	NA	NA	Strep. parasanguinis	1	8	1	8	Shared
purN	1	1	0	NA	NA	Strep. parasanguinis	1	8	1	8	Shared
purH	1	1	0	NA	NA	Strep. parasanguinis	1	8	1	8	Shared
citB~~~luxR~~~degU	1	1	0	NA	NA	Strep. parasanguinis	1	8	1	8	Shared
atpA	1	1	0	NA	NA	Strep. parasanguinis	1	8	1	8	Shared
atpG	1	1	0	NA	NA	Strep. parasanguinis	1	8	1	8	Shared
rplJ	1	1	0	NA	NA	Strep. parasanguinis	1	8	1	8	Shared
rplL	1	1	0	NA	NA	Strep. parasanguinis	1	8	1	8	Shared
atpD	1	1	0	NA	NA	Strep. parasanguinis	1	8	1	8	Shared
atpC	1	1	0	NA	NA	Strep. parasanguinis	1	8	1	8	Shared
tadA	1	1	0	NA	NA	Strep. parasanguinis	1	8	1	8	Shared
clpA~~~clpC	1	1	0	NA	NA	Strep. parasanguinis	1	8	1	8	Shared
ctsR	1	1	0	NA	NA	Strep. parasanguinis	1	8	1	8	Shared
aspB	1	1	0	NA	NA	Strep. parasanguinis	1	8	1	8	Shared
plsX	1	1	0	NA	NA	Strep. parasanguinis	1	8	1	8	Shared
group_2303	1	1	0	NA	NA	Strep. parasanguinis	1	8	1	8	Shared
group_20927	1	1	0	NA	NA	Strep. parasanguinis	1	8	1	8	Shared
purD	1	1	0	NA	NA	Strep. parasanguinis	1	8	1	8	Shared
purK	1	1	0	NA	NA	Strep. parasanguinis	1	8	1	8	Shared
group_2992	1	1	0	NA	NA	Strep. parasanguinis	1	8	1	8	Shared
uvrC	1	1	0	NA	NA	Strep. parasanguinis	1	8	1	8	Shared
spx	1	1	0	NA	NA	Strep. parasanguinis	1	8	1	8	Shared
group_2862	1	1	0	NA	NA	Strep. parasanguinis	1	8	1	8	Shared
aCT	1	1	0	NA	NA	Strep. parasanguinis	1	8	1	8	Shared
trmN6	1	1	0	NA	NA	Strep. parasanguinis	1	8	1	8	Shared
group_2810	1	1	0	NA	NA	Strep. parasanguinis	1	8	1	8	Shared
rnc	1	1	0	NA	NA	Strep. parasanguinis	1	8	1	8	Shared
cshA~~~srmB	1	1	0	NA	NA	Strep. parasanguinis	1	8	1	8	Shared
tlyC	1	1	0	NA	NA	Strep. parasanguinis	1	8	1	8	Shared
ynzC	1	1	0	NA	NA	Strep. parasanguinis	1	8	1	8	Shared
group_2656	1	1	0	NA	NA	Strep. parasanguinis	1	8	1	8	Shared
glyQ	1	1	0	NA	NA	Strep. parasanguinis	1	8	1	8	Shared
abcf	1	1	0	NA	NA	Strep. parasanguinis	1	8	1	8	Shared
phnP~~~walJ	1	1	0	NA	NA	Strep. parasanguinis	1	8	1	8	Shared
vicK~~~walK	1	1	0	NA	NA	Strep. parasanguinis	1	8	1	8	Shared
yycF	1	1	0	NA	NA	Strep. parasanguinis	1	8	1	8	Shared
norM~~~mepA	1	1	0	NA	NA	Strep. parasanguinis	1	8	1	8	Shared
thrC	1	1	0	NA	NA	Strep. parasanguinis	1	8	1	8	Shared
metL1	1	1	0	NA	NA	Strep. parasanguinis	1	8	1	8	Shared
group_2541	1	1	0	NA	NA	Strep. parasanguinis	1	8	1	8	Shared
group_2539	1	1	0	NA	NA	Strep. parasanguinis	1	8	1	8	Shared
ybbA	1	1	0	NA	NA	Strep. parasanguinis	1	8	1	8	Shared
caiD~~~fabM	1	1	0	NA	NA	Strep. parasanguinis	1	8	1	8	Shared
marR~~~fabT	1	1	0	NA	NA	Strep. parasanguinis	1	8	1	8	Shared
nupQ~~~plsY	1	1	0	NA	NA	Strep. parasanguinis	1	8	1	8	Shared
group_2508	1	1	0	NA	NA	Strep. parasanguinis	1	8	1	8	Shared
group_2448	1	1	0	NA	NA	Strep. parasanguinis	1	8	1	8	Shared
cdd	1	1	0	NA	NA	Strep. parasanguinis	1	8	1	8	Shared
deoC	1	1	0	NA	NA	Strep. parasanguinis	1	8	1	8	Shared
pdp	1	1	0	NA	NA	Strep. parasanguinis	1	8	1	8	Shared
fabK	1	1	0	NA	NA	Strep. parasanguinis	1	8	1	8	Shared
group_2410	1	1	0	NA	NA	Strep. parasanguinis	1	8	1	8	Shared
group_2409	1	1	0	NA	NA	Strep. parasanguinis	1	8	1	8	Shared
rsmC	1	1	0	NA	NA	Strep. parasanguinis	1	8	1	8	Shared
pptA	1	1	0	NA	NA	Strep. parasanguinis	1	8	1	8	Shared
rpsT	1	1	0	NA	NA	Strep. parasanguinis	1	8	1	8	Shared
xth~~~exoA~~~xthA	1	1	0	NA	NA	Strep. parasanguinis	1	8	1	8	Shared
fabF	1	1	0	NA	NA	Strep. parasanguinis	1	8	1	8	Shared
accB	1	1	0	NA	NA	Strep. parasanguinis	1	8	1	8	Shared
scaA~~~pepO	1	1	0	NA	NA	Strep. parasanguinis	1	8	1	8	Shared
prfC	1	1	0	NA	NA	Strep. parasanguinis	1	8	1	8	Shared
group_2155	1	1	0	NA	NA	Strep. parasanguinis	1	8	1	8	Shared
ruvB	1	1	0	NA	NA	Strep. parasanguinis	1	8	1	8	Shared
fabZ	1	1	0	NA	NA	Strep. parasanguinis	1	8	1	8	Shared
group_2136	1	1	0	NA	NA	Strep. parasanguinis	1	8	1	8	Shared
xapA	1	1	0	NA	NA	Strep. parasanguinis	1	8	1	8	Shared
rpiA	1	1	0	NA	NA	Strep. parasanguinis	1	8	1	8	Shared
deoD	1	1	0	NA	NA	Strep. parasanguinis	1	8	1	8	Shared
cysE~~~epsC~~~rimI	1	1	0	NA	NA	Strep. parasanguinis	1	8	1	8	Shared
group_2039	1	1	0	NA	NA	Strep. parasanguinis	1	8	1	8	Shared
pyrD~~~pyrDA	1	1	0	NA	NA	Strep. parasanguinis	1	8	1	8	Shared
corA	1	1	0	NA	NA	Strep. parasanguinis	1	8	1	8	Shared
yqeH	1	1	0	NA	NA	Strep. parasanguinis	1	8	1	8	Shared
accA	1	1	0	NA	NA	Strep. parasanguinis	1	8	1	8	Shared
ruvA	1	1	0	NA	NA	Strep. parasanguinis	1	8	1	8	Shared
cysS	1	1	0	NA	NA	Strep. parasanguinis	1	8	1	8	Shared
yhbY	1	1	0	NA	NA	Strep. parasanguinis	1	8	1	8	Shared
mrnC	1	1	0	NA	NA	Strep. parasanguinis	1	8	1	8	Shared
cinA	1	1	0	NA	NA	Strep. parasanguinis	1	8	1	8	Shared
recA	1	1	0	NA	NA	Strep. parasanguinis	1	8	1	8	Shared
group_1585	1	1	0	NA	NA	Strep. parasanguinis	1	8	1	8	Shared
yqeK	1	1	0	NA	NA	Strep. parasanguinis	1	8	1	8	Shared
nadD	1	1	0	NA	NA	Strep. parasanguinis	1	8	1	8	Shared
rsfS	1	1	0	NA	NA	Strep. parasanguinis	1	8	1	8	Shared
gpmA	1	1	0	NA	NA	Strep. parasanguinis	1	8	1	8	Shared
tmcAL	1	1	0	NA	NA	Strep. parasanguinis	1	8	1	8	Shared
ubiG~~~ubiE	1	1	0	NA	NA	Strep. parasanguinis	1	8	1	8	Shared
rplI	1	1	0	NA	NA	Strep. parasanguinis	1	8	1	8	Shared
group_1152	1	1	0	NA	NA	Strep. parasanguinis	1	8	1	8	Shared
group_1146	1	1	0	NA	NA	Strep. parasanguinis	1	8	1	8	Shared
mnmA	1	1	0	NA	NA	Strep. parasanguinis	1	8	1	8	Shared
mnmG	1	1	0	NA	NA	Strep. parasanguinis	1	8	1	8	Shared
tpiA	1	1	0	NA	NA	Strep. parasanguinis	1	8	1	8	Shared
group_20876	1	1	0	NA	NA	Strep. parasanguinis	1	8	1	8	Shared
yazA~~~yhbQ	1	0.875	0.125	1	1	Strep. parasanguinis	1	7	1	8	Shared
group_2787	1	1	0	NA	NA	Strep. parasanguinis	1	8	1	8	Shared
brnQ	1	1	0	NA	NA	Strep. parasanguinis	1	8	1	8	Shared
group_2704	1	1	0	NA	NA	Strep. parasanguinis	1	8	1	8	Shared
pflA	1	1	0	NA	NA	Strep. parasanguinis	1	8	1	8	Shared
lpd	1	1	0	NA	NA	Strep. parasanguinis	1	8	1	8	Shared
xerS~~~xerC	1	1	0	NA	NA	Strep. parasanguinis	1	8	1	8	Shared
fhs~~~fhs2	1	1	0	NA	NA	Strep. parasanguinis	1	8	1	8	Shared
mutL	1	1	0	NA	NA	Strep. parasanguinis	1	8	1	8	Shared
accD	1	1	0	NA	NA	Strep. parasanguinis	1	8	1	8	Shared
manB	1	1	0	NA	NA	Strep. parasanguinis	1	8	1	8	Shared
rlmD~~~trmA~~~rumA	1	1	0	NA	NA	Strep. parasanguinis	1	8	1	8	Shared
asd	1	1	0	NA	NA	Strep. parasanguinis	1	8	1	8	Shared
rpsD	1	1	0	NA	NA	Strep. parasanguinis	1	8	1	8	Shared
purB	1	1	0	NA	NA	Strep. parasanguinis	1	8	1	8	Shared
group_3131	1	1	0	NA	NA	Strep. parasanguinis	1	8	1	8	Shared
dapD	1	1	0	NA	NA	Strep. parasanguinis	1	8	1	8	Shared
ciaH~~~baeS	1	1	0	NA	NA	Strep. parasanguinis	1	8	1	8	Shared
ompR~~~ciaR	1	1	0	NA	NA	Strep. parasanguinis	1	8	1	8	Shared
group_2974	1	1	0	NA	NA	Strep. parasanguinis	1	8	1	8	Shared
pepV	1	1	0	NA	NA	Strep. parasanguinis	1	8	1	8	Shared
hup~~~himA	1	1	0	NA	NA	Strep. parasanguinis	1	8	1	8	Shared
mdtK~~~norM~~~pdrM	1	1	0	NA	NA	Strep. parasanguinis	1	8	1	8	Shared
yohK~~~lrgB	0	0.625	0.625	0.444444	1	Strep. parasanguinis	0	5	1	8	Oral-specific
xpt~~~apt	1	1	0	NA	NA	Strep. parasanguinis	1	8	1	8	Shared
group_21114	1	1	0	NA	NA	Strep. parasanguinis	1	8	1	8	Shared
ssbA~~~ssb	1	1	0	NA	NA	Strep. parasanguinis	1	8	1	8	Shared
group_17652	1	1	0	NA	NA	Strep. parasanguinis	1	8	1	8	Shared
rpe	1	1	0	NA	NA	Strep. parasanguinis	1	8	1	8	Shared
yhaM	1	1	0	NA	NA	Strep. parasanguinis	1	8	1	8	Shared
rmuC	1	1	0	NA	NA	Strep. parasanguinis	1	8	1	8	Shared
rsgA	1	1	0	NA	NA	Strep. parasanguinis	1	8	1	8	Shared
yxjI	1	1	0	NA	NA	Strep. parasanguinis	1	8	1	8	Shared
potE	1	1	0	NA	NA	Strep. parasanguinis	1	8	1	8	Shared
dapA	1	1	0	NA	NA	Strep. parasanguinis	1	8	1	8	Shared
group_21447	1	1	0	NA	NA	Strep. parasanguinis	1	8	1	8	Shared
group_21374	1	1	0	NA	NA	Strep. parasanguinis	1	8	1	8	Shared
group_19979	1	1	0	NA	NA	Strep. parasanguinis	1	8	1	8	Shared
group_18452	1	1	0	NA	NA	Strep. parasanguinis	1	8	1	8	Shared
group_17755	1	1	0	NA	NA	Strep. parasanguinis	1	8	1	8	Shared
group_16627	1	1	0	NA	NA	Strep. parasanguinis	1	8	1	8	Shared
group_6972	1	1	0	NA	NA	Strep. parasanguinis	1	8	1	8	Shared
group_3029	1	1	0	NA	NA	Strep. parasanguinis	1	8	1	8	Shared
nrdF	1	1	0	NA	NA	Strep. parasanguinis	1	8	1	8	Shared
group_2993	1	1	0	NA	NA	Strep. parasanguinis	1	8	1	8	Shared
htpX	1	1	0	NA	NA	Strep. parasanguinis	1	8	1	8	Shared
group_2970	1	1	0	NA	NA	Strep. parasanguinis	1	8	1	8	Shared
ldh~~~mdh	1	1	0	NA	NA	Strep. parasanguinis	1	8	1	8	Shared
miaA	1	1	0	NA	NA	Strep. parasanguinis	1	8	1	8	Shared
nrdH	1	1	0	NA	NA	Strep. parasanguinis	1	8	1	8	Shared
arlR~~~csrR~~~ompR	1	1	0	NA	NA	Strep. parasanguinis	1	8	1	8	Shared
gndA	1	1	0	NA	NA	Strep. parasanguinis	1	8	1	8	Shared
rnz	1	1	0	NA	NA	Strep. parasanguinis	1	8	1	8	Shared
yqjQ	1	1	0	NA	NA	Strep. parasanguinis	1	8	1	8	Shared
group_2859	1	1	0	NA	NA	Strep. parasanguinis	1	8	1	8	Shared
glmU	1	1	0	NA	NA	Strep. parasanguinis	1	8	1	8	Shared
group_2799	1	1	0	NA	NA	Strep. parasanguinis	1	8	1	8	Shared
mtnN	1	1	0	NA	NA	Strep. parasanguinis	1	8	1	8	Shared
rsmA	1	1	0	NA	NA	Strep. parasanguinis	1	8	1	8	Shared
khpA	1	1	0	NA	NA	Strep. parasanguinis	1	8	1	8	Shared
rpsP	1	1	0	NA	NA	Strep. parasanguinis	1	8	1	8	Shared
ideR~~~mntR~~~scaR~~~marR	1	1	0	NA	NA	Strep. parasanguinis	1	8	1	8	Shared
dnaD	1	1	0	NA	NA	Strep. parasanguinis	1	8	1	8	Shared
glgA	1	1	0	NA	NA	Strep. parasanguinis	1	8	1	8	Shared
glgD	1	1	0	NA	NA	Strep. parasanguinis	1	8	1	8	Shared
glgC	1	1	0	NA	NA	Strep. parasanguinis	1	8	1	8	Shared
glgB	1	1	0	NA	NA	Strep. parasanguinis	1	8	1	8	Shared
tsaB	1	1	0	NA	NA	Strep. parasanguinis	1	8	1	8	Shared
hisS	1	1	0	NA	NA	Strep. parasanguinis	1	8	1	8	Shared
amiF~~~oppF	1	1	0	NA	NA	Strep. parasanguinis	1	8	1	8	Shared
oppD~~~amiE	1	1	0	NA	NA	Strep. parasanguinis	1	8	1	8	Shared
oppC	1	1	0	NA	NA	Strep. parasanguinis	1	8	1	8	Shared
oppB~~~gsiC~~~amiC	1	1	0	NA	NA	Strep. parasanguinis	1	8	1	8	Shared
sarA~~~aliA~~~aliB~~~oppA	1	1	0	NA	NA	Strep. parasanguinis	1	8	1	8	Shared
prmA	1	1	0	NA	NA	Strep. parasanguinis	1	8	1	8	Shared
rsmE	1	1	0	NA	NA	Strep. parasanguinis	1	8	1	8	Shared
group_2192	1	1	0	NA	NA	Strep. parasanguinis	1	8	1	8	Shared
mscL	1	1	0	NA	NA	Strep. parasanguinis	1	8	1	8	Shared
tgt	1	1	0	NA	NA	Strep. parasanguinis	1	8	1	8	Shared
rplK	1	1	0	NA	NA	Strep. parasanguinis	1	8	1	8	Shared
rplA	1	1	0	NA	NA	Strep. parasanguinis	1	8	1	8	Shared
hflC~~~hflK~~~ybbK	1	1	0	NA	NA	Strep. parasanguinis	1	8	1	8	Shared
hrcA~~~deoR	1	1	0	NA	NA	Strep. parasanguinis	1	8	1	8	Shared
grpE	1	1	0	NA	NA	Strep. parasanguinis	1	8	1	8	Shared
dnaK	1	1	0	NA	NA	Strep. parasanguinis	1	8	1	8	Shared
nifU~~~iscU	1	1	0	NA	NA	Strep. parasanguinis	1	8	1	8	Shared
sufS	1	1	0	NA	NA	Strep. parasanguinis	1	8	1	8	Shared
sufD	1	1	0	NA	NA	Strep. parasanguinis	1	8	1	8	Shared
sufC	1	1	0	NA	NA	Strep. parasanguinis	1	8	1	8	Shared
atpF	1	1	0	NA	NA	Strep. parasanguinis	1	8	1	8	Shared
group_534	1	1	0	NA	NA	Strep. parasanguinis	1	8	1	8	Shared
fabG	1	1	0	NA	NA	Strep. parasanguinis	1	8	1	8	Shared
atpB	1	1	0	NA	NA	Strep. parasanguinis	1	8	1	8	Shared
uppP	1	1	0	NA	NA	Strep. parasanguinis	1	8	1	8	Shared
group_287	1	1	0	NA	NA	Strep. parasanguinis	1	8	1	8	Shared
group_19698	1	1	0	NA	NA	Strep. parasanguinis	1	8	1	8	Shared
group_3003	1	0.875	0.125	1	1	Strep. parasanguinis	1	7	1	8	Shared
group_2967	1	1	0	NA	NA	Strep. parasanguinis	1	8	1	8	Shared
pyk	1	1	0	NA	NA	Strep. parasanguinis	1	8	1	8	Shared
pfkA	1	1	0	NA	NA	Strep. parasanguinis	1	8	1	8	Shared
group_2943	1	1	0	NA	NA	Strep. parasanguinis	1	8	1	8	Shared
group_2912	1	1	0	NA	NA	Strep. parasanguinis	1	8	1	8	Shared
group_2894	1	1	0	NA	NA	Strep. parasanguinis	1	8	1	8	Shared
group_2888	1	1	0	NA	NA	Strep. parasanguinis	1	8	1	8	Shared
group_2742	1	1	0	NA	NA	Strep. parasanguinis	1	8	1	8	Shared
tatD~~~ycfH	1	1	0	NA	NA	Strep. parasanguinis	1	8	1	8	Shared
apt	1	1	0	NA	NA	Strep. parasanguinis	1	8	1	8	Shared
rqcH~~~fbp62~~~fbpA~~~pavA	1	1	0	NA	NA	Strep. parasanguinis	1	8	1	8	Shared
hslO	1	1	0	NA	NA	Strep. parasanguinis	1	8	1	8	Shared
dusB	1	1	0	NA	NA	Strep. parasanguinis	1	8	1	8	Shared
azlD	1	1	0	NA	NA	Strep. parasanguinis	1	8	1	8	Shared
pta	1	1	0	NA	NA	Strep. parasanguinis	1	8	1	8	Shared
group_2549	1	1	0	NA	NA	Strep. parasanguinis	1	8	1	8	Shared
nadK	1	1	0	NA	NA	Strep. parasanguinis	1	8	1	8	Shared
group_2430	1	1	0	NA	NA	Strep. parasanguinis	1	8	1	8	Shared
prs~~~prs2	1	1	0	NA	NA	Strep. parasanguinis	1	8	1	8	Shared
group_2391	1	1	0	NA	NA	Strep. parasanguinis	1	8	1	8	Shared
alr~~~acpS	1	1	0	NA	NA	Strep. parasanguinis	1	8	1	8	Shared
lacI~~~purR	1	1	0	NA	NA	Strep. parasanguinis	1	8	1	8	Shared
group_2343	1	1	0	NA	NA	Strep. parasanguinis	1	8	1	8	Shared
pbuX	1	1	0	NA	NA	Strep. parasanguinis	1	8	1	8	Shared
sacC	1	1	0	NA	NA	Strep. parasanguinis	1	8	1	8	Shared
efp	1	1	0	NA	NA	Strep. parasanguinis	1	8	1	8	Shared
aroG1	1	1	0	NA	NA	Strep. parasanguinis	1	8	1	8	Shared
yloU	1	1	0	NA	NA	Strep. parasanguinis	1	8	1	8	Shared
nusB	1	1	0	NA	NA	Strep. parasanguinis	1	8	1	8	Shared
group_2193	1	1	0	NA	NA	Strep. parasanguinis	1	8	1	8	Shared
radA	1	1	0	NA	NA	Strep. parasanguinis	1	8	1	8	Shared
dut	1	1	0	NA	NA	Strep. parasanguinis	1	8	1	8	Shared
yjbM	1	1	0	NA	NA	Strep. parasanguinis	1	8	1	8	Shared
radC	1	1	0	NA	NA	Strep. parasanguinis	1	8	1	8	Shared
recO	1	1	0	NA	NA	Strep. parasanguinis	1	8	1	8	Shared
group_2308	1	1	0	NA	NA	Strep. parasanguinis	1	8	1	8	Shared
group_2298	1	1	0	NA	NA	Strep. parasanguinis	1	8	1	8	Shared
purR	1	1	0	NA	NA	Strep. parasanguinis	1	8	1	8	Shared
group_20360	1	1	0	NA	NA	Strep. parasanguinis	1	8	1	8	Shared
group_19754	1	1	0	NA	NA	Strep. parasanguinis	1	8	1	8	Shared
group_18735	1	1	0	NA	NA	Strep. parasanguinis	1	8	1	8	Shared
group_3068	1	1	0	NA	NA	Strep. parasanguinis	1	8	1	8	Shared
asnS	1	1	0	NA	NA	Strep. parasanguinis	1	8	1	8	Shared
thyA	1	1	0	NA	NA	Strep. parasanguinis	1	8	1	8	Shared
group_3043	1	1	0	NA	NA	Strep. parasanguinis	1	8	1	8	Shared
sprT	1	1	0	NA	NA	Strep. parasanguinis	1	8	1	8	Shared
group_2977	1	1	0	NA	NA	Strep. parasanguinis	1	8	1	8	Shared
ireB	1	1	0	NA	NA	Strep. parasanguinis	1	8	1	8	Shared
rpmA	1	1	0	NA	NA	Strep. parasanguinis	1	8	1	8	Shared
group_2952	1	1	0	NA	NA	Strep. parasanguinis	1	8	1	8	Shared
ysxB	1	1	0	NA	NA	Strep. parasanguinis	1	8	1	8	Shared
pyrB	1	1	0	NA	NA	Strep. parasanguinis	1	8	1	8	Shared
yraQ	1	1	0	NA	NA	Strep. parasanguinis	1	8	1	8	Shared
ycgQ	1	1	0	NA	NA	Strep. parasanguinis	1	8	1	8	Shared
pyrR	1	1	0	NA	NA	Strep. parasanguinis	1	8	1	8	Shared
rplU	1	1	0	NA	NA	Strep. parasanguinis	1	8	1	8	Shared
trmD	1	1	0	NA	NA	Strep. parasanguinis	1	8	1	8	Shared
group_2882	1	1	0	NA	NA	Strep. parasanguinis	1	8	1	8	Shared
zwf	1	1	0	NA	NA	Strep. parasanguinis	1	8	1	8	Shared
thiI	1	1	0	NA	NA	Strep. parasanguinis	1	8	1	8	Shared
group_2880	1	1	0	NA	NA	Strep. parasanguinis	1	8	1	8	Shared
ruvX	1	1	0	NA	NA	Strep. parasanguinis	1	8	1	8	Shared
yrzB	1	1	0	NA	NA	Strep. parasanguinis	1	8	1	8	Shared
yjdM~~~phnA	1	1	0	NA	NA	Strep. parasanguinis	1	8	1	8	Shared
group_2855	1	1	0	NA	NA	Strep. parasanguinis	1	8	1	8	Shared
group_2853	1	1	0	NA	NA	Strep. parasanguinis	1	8	1	8	Shared
lspA	1	1	0	NA	NA	Strep. parasanguinis	1	8	1	8	Shared
group_2851	1	1	0	NA	NA	Strep. parasanguinis	1	8	1	8	Shared
group_2841	1	1	0	NA	NA	Strep. parasanguinis	1	8	1	8	Shared
group_2822	1	1	0	NA	NA	Strep. parasanguinis	1	8	1	8	Shared
group_2813	1	1	0	NA	NA	Strep. parasanguinis	1	8	1	8	Shared
group_2811	1	1	0	NA	NA	Strep. parasanguinis	1	8	1	8	Shared
lepA	1	1	0	NA	NA	Strep. parasanguinis	1	8	1	8	Shared
cof~~~ybjI	1	1	0	NA	NA	Strep. parasanguinis	1	8	1	8	Shared
yidA~~~cof	1	1	0	NA	NA	Strep. parasanguinis	1	8	1	8	Shared
ftsY	1	1	0	NA	NA	Strep. parasanguinis	1	8	1	8	Shared
group_2674	1	1	0	NA	NA	Strep. parasanguinis	1	8	1	8	Shared
mraY	1	1	0	NA	NA	Strep. parasanguinis	1	8	1	8	Shared
rsmH~~~mraW	1	1	0	NA	NA	Strep. parasanguinis	1	8	1	8	Shared
group_2638	1	1	0	NA	NA	Strep. parasanguinis	1	8	1	8	Shared
group_2637	1	1	0	NA	NA	Strep. parasanguinis	1	8	1	8	Shared
ilvE	1	1	0	NA	NA	Strep. parasanguinis	1	8	1	8	Shared
group_2625	1	1	0	NA	NA	Strep. parasanguinis	1	8	1	8	Shared
rpsA	1	1	0	NA	NA	Strep. parasanguinis	1	8	1	8	Shared
upp	1	1	0	NA	NA	Strep. parasanguinis	1	8	1	8	Shared
pepP	1	1	0	NA	NA	Strep. parasanguinis	1	8	1	8	Shared
clpP	1	1	0	NA	NA	Strep. parasanguinis	1	8	1	8	Shared
livK	1	1	0	NA	NA	Strep. parasanguinis	1	8	1	8	Shared
gntR~~~yvoA~~~mngR	1	1	0	NA	NA	Strep. parasanguinis	1	8	1	8	Shared
ylxM	1	1	0	NA	NA	Strep. parasanguinis	1	8	1	8	Shared
ffh	1	1	0	NA	NA	Strep. parasanguinis	1	8	1	8	Shared
smpB~~~tehB	1	1	0	NA	NA	Strep. parasanguinis	1	8	1	8	Shared
group_2564	1	1	0	NA	NA	Strep. parasanguinis	1	8	1	8	Shared
livH	1	1	0	NA	NA	Strep. parasanguinis	1	8	1	8	Shared
nrnA	1	1	0	NA	NA	Strep. parasanguinis	1	8	1	8	Shared
livM	1	1	0	NA	NA	Strep. parasanguinis	1	8	1	8	Shared
rpmE~~~rpmE2	1	1	0	NA	NA	Strep. parasanguinis	1	8	1	8	Shared
mltE~~~pmp23	1	1	0	NA	NA	Strep. parasanguinis	1	8	1	8	Shared
ndpA	1	1	0	NA	NA	Strep. parasanguinis	1	8	1	8	Shared
rodA~~~ftsW	1	1	0	NA	NA	Strep. parasanguinis	1	8	1	8	Shared
yajL	1	1	0	NA	NA	Strep. parasanguinis	1	8	1	8	Shared
fldA	1	1	0	NA	NA	Strep. parasanguinis	1	8	1	8	Shared
tVP38	1	1	0	NA	NA	Strep. parasanguinis	1	8	1	8	Shared
group_2506	1	0.75	0.25	1	1	Strep. parasanguinis	1	6	1	8	Shared
group_2497	1	1	0	NA	NA	Strep. parasanguinis	1	8	1	8	Shared
livF	1	1	0	NA	NA	Strep. parasanguinis	1	8	1	8	Shared
argS	1	1	0	NA	NA	Strep. parasanguinis	1	8	1	8	Shared
gyrB	1	1	0	NA	NA	Strep. parasanguinis	1	8	1	8	Shared
perM	1	1	0	NA	NA	Strep. parasanguinis	1	8	1	8	Shared
glyA	1	1	0	NA	NA	Strep. parasanguinis	1	8	1	8	Shared
group_2475	1	1	0	NA	NA	Strep. parasanguinis	1	8	1	8	Shared
ezrA	1	1	0	NA	NA	Strep. parasanguinis	1	8	1	8	Shared
fabH	1	1	0	NA	NA	Strep. parasanguinis	1	8	1	8	Shared
tmpC	1	1	0	NA	NA	Strep. parasanguinis	1	8	1	8	Shared
ccpA~~~lacI	1	1	0	NA	NA	Strep. parasanguinis	1	8	1	8	Shared
tmk	1	1	0	NA	NA	Strep. parasanguinis	1	8	1	8	Shared
yabA	1	1	0	NA	NA	Strep. parasanguinis	1	8	1	8	Shared
group_2372	1	1	0	NA	NA	Strep. parasanguinis	1	8	1	8	Shared
prfA	1	1	0	NA	NA	Strep. parasanguinis	1	8	1	8	Shared
tdk	1	1	0	NA	NA	Strep. parasanguinis	1	8	1	8	Shared
ssaB~~~scaA~~~fimA~~~psaA	1	1	0	NA	NA	Strep. parasanguinis	1	8	1	8	Shared
coaA	1	1	0	NA	NA	Strep. parasanguinis	1	8	1	8	Shared
tig	1	1	0	NA	NA	Strep. parasanguinis	1	8	1	8	Shared
scaB~~~znuB	1	1	0	NA	NA	Strep. parasanguinis	1	8	1	8	Shared
rnhB	1	1	0	NA	NA	Strep. parasanguinis	1	8	1	8	Shared
era	1	1	0	NA	NA	Strep. parasanguinis	1	8	1	8	Shared
group_2253	1	1	0	NA	NA	Strep. parasanguinis	1	8	1	8	Shared
ylqF	1	1	0	NA	NA	Strep. parasanguinis	1	8	1	8	Shared
rsmI	1	1	0	NA	NA	Strep. parasanguinis	1	8	1	8	Shared
yccU	1	1	0	NA	NA	Strep. parasanguinis	1	8	1	8	Shared
sitB~~~fhuC~~~scaC~~~znuC	1	1	0	NA	NA	Strep. parasanguinis	1	8	1	8	Shared
dgkA	1	1	0	NA	NA	Strep. parasanguinis	1	8	1	8	Shared
msrB~~~msrAB1~~~msrA~~~msrAB	1	1	0	NA	NA	Strep. parasanguinis	1	8	1	8	Shared
yqeG	1	1	0	NA	NA	Strep. parasanguinis	1	8	1	8	Shared
mnmE	1	1	0	NA	NA	Strep. parasanguinis	1	8	1	8	Shared
nagC	1	1	0	NA	NA	Strep. parasanguinis	1	8	1	8	Shared
metG	1	1	0	NA	NA	Strep. parasanguinis	1	8	1	8	Shared
bceB~~~yxdM	1	1	0	NA	NA	Strep. parasanguinis	1	8	1	8	Shared
ybeY	1	1	0	NA	NA	Strep. parasanguinis	1	8	1	8	Shared
gdhA	1	1	0	NA	NA	Strep. parasanguinis	1	8	1	8	Shared
pyrE	1	1	0	NA	NA	Strep. parasanguinis	1	8	1	8	Shared
pyrF	1	1	0	NA	NA	Strep. parasanguinis	1	8	1	8	Shared
argE	1	1	0	NA	NA	Strep. parasanguinis	1	8	1	8	Shared
pyrD~~~pyrDB	1	1	0	NA	NA	Strep. parasanguinis	1	8	1	8	Shared
group_1983	1	1	0	NA	NA	Strep. parasanguinis	1	8	1	8	Shared
group_1902	1	1	0	NA	NA	Strep. parasanguinis	1	8	1	8	Shared
serS	1	1	0	NA	NA	Strep. parasanguinis	1	8	1	8	Shared
group_1731	1	1	0	NA	NA	Strep. parasanguinis	1	8	1	8	Shared
recD~~~yrrC	1	1	0	NA	NA	Strep. parasanguinis	1	8	1	8	Shared
tag	1	1	0	NA	NA	Strep. parasanguinis	1	8	1	8	Shared
dinB	1	1	0	NA	NA	Strep. parasanguinis	1	8	1	8	Shared
rnhC	1	1	0	NA	NA	Strep. parasanguinis	1	8	1	8	Shared
zapA	1	1	0	NA	NA	Strep. parasanguinis	1	8	1	8	Shared
mutS2	1	1	0	NA	NA	Strep. parasanguinis	1	8	1	8	Shared
sdaAA	1	1	0	NA	NA	Strep. parasanguinis	1	8	1	8	Shared
sdaAB	1	1	0	NA	NA	Strep. parasanguinis	1	8	1	8	Shared
gdpP	1	1	0	NA	NA	Strep. parasanguinis	1	8	1	8	Shared
rplS	1	1	0	NA	NA	Strep. parasanguinis	1	8	1	8	Shared
group_684	1	1	0	NA	NA	Strep. parasanguinis	1	8	1	8	Shared
group_532	1	1	0	NA	NA	Strep. parasanguinis	1	8	1	8	Shared
group_479	1	1	0	NA	NA	Strep. parasanguinis	1	8	1	8	Shared
group_17053	1	1	0	NA	NA	Strep. parasanguinis	1	8	1	8	Shared
pgi	1	1	0	NA	NA	Strep. parasanguinis	1	8	1	8	Shared
cls	1	1	0	NA	NA	Strep. parasanguinis	1	8	1	8	Shared
yhbU~~~rlhA	1	1	0	NA	NA	Strep. parasanguinis	1	8	1	8	Shared
rlhA	1	1	0	NA	NA	Strep. parasanguinis	1	8	1	8	Shared
truB	1	1	0	NA	NA	Strep. parasanguinis	1	8	1	8	Shared
group_2950	1	1	0	NA	NA	Strep. parasanguinis	1	8	1	8	Shared
pepT	1	1	0	NA	NA	Strep. parasanguinis	1	8	1	8	Shared
lysS	1	1	0	NA	NA	Strep. parasanguinis	1	8	1	8	Shared
patB~~~malY	1	1	0	NA	NA	Strep. parasanguinis	1	8	1	8	Shared
ytgP~~~spoVB	1	1	0	NA	NA	Strep. parasanguinis	1	8	1	8	Shared
murE	1	1	0	NA	NA	Strep. parasanguinis	1	8	1	8	Shared
ebsC	1	1	0	NA	NA	Strep. parasanguinis	1	8	1	8	Shared
group_2765	1	1	0	NA	NA	Strep. parasanguinis	1	8	1	8	Shared
ccdA2~~~ccdA	1	1	0	NA	NA	Strep. parasanguinis	1	8	1	8	Shared
group_2749	1	1	0	NA	NA	Strep. parasanguinis	1	8	1	8	Shared
ppaC~~~pPX1	1	1	0	NA	NA	Strep. parasanguinis	1	8	1	8	Shared
yigL~~~cof	1	1	0	NA	NA	Strep. parasanguinis	1	8	1	8	Shared
plsY	1	1	0	NA	NA	Strep. parasanguinis	1	8	1	8	Shared
pbuO~~~nCS2	1	1	0	NA	NA	Strep. parasanguinis	1	8	1	8	Shared
tsaE	1	1	0	NA	NA	Strep. parasanguinis	1	8	1	8	Shared
nox	1	1	0	NA	NA	Strep. parasanguinis	1	8	1	8	Shared
ant6	1	1	0	NA	NA	Strep. parasanguinis	1	8	1	8	Shared
guaA	1	1	0	NA	NA	Strep. parasanguinis	1	8	1	8	Shared
livG	1	1	0	NA	NA	Strep. parasanguinis	1	8	1	8	Shared
rnjA	1	1	0	NA	NA	Strep. parasanguinis	1	8	1	8	Shared
rlmI	1	1	0	NA	NA	Strep. parasanguinis	1	8	1	8	Shared
truA	1	1	0	NA	NA	Strep. parasanguinis	1	8	1	8	Shared
aroD	1	1	0	NA	NA	Strep. parasanguinis	1	8	1	8	Shared
acuB~~~cBS	1	1	0	NA	NA	Strep. parasanguinis	1	8	1	8	Shared
mutM	1	1	0	NA	NA	Strep. parasanguinis	1	8	1	8	Shared
aroB~~~aroE	1	1	0	NA	NA	Strep. parasanguinis	1	8	1	8	Shared
aroC	1	1	0	NA	NA	Strep. parasanguinis	1	8	1	8	Shared
tyrA	1	1	0	NA	NA	Strep. parasanguinis	1	8	1	8	Shared
ylbF	1	1	0	NA	NA	Strep. parasanguinis	1	8	1	8	Shared
divIVA	1	1	0	NA	NA	Strep. parasanguinis	1	8	1	8	Shared
nth	1	1	0	NA	NA	Strep. parasanguinis	1	8	1	8	Shared
group_2244	1	1	0	NA	NA	Strep. parasanguinis	1	8	1	8	Shared
coaC	1	1	0	NA	NA	Strep. parasanguinis	1	8	1	8	Shared
yfkJ~~~wzb	1	1	0	NA	NA	Strep. parasanguinis	1	8	1	8	Shared
group_2104	1	1	0	NA	NA	Strep. parasanguinis	1	8	1	8	Shared
mutY	1	1	0	NA	NA	Strep. parasanguinis	1	8	1	8	Shared
group_1944	1	1	0	NA	NA	Strep. parasanguinis	1	8	1	8	Shared
malK	1	1	0	NA	NA	Strep. parasanguinis	1	8	1	8	Shared
gloB	1	1	0	NA	NA	Strep. parasanguinis	1	8	1	8	Shared
tACO1	1	1	0	NA	NA	Strep. parasanguinis	1	8	1	8	Shared
group_739	1	1	0	NA	NA	Strep. parasanguinis	1	8	1	8	Shared
udk	1	1	0	NA	NA	Strep. parasanguinis	1	8	1	8	Shared
cshA~~~srmB~~~yfmL	1	1	0	NA	NA	Strep. parasanguinis	1	8	1	8	Shared
group_2914	1	1	0	NA	NA	Strep. parasanguinis	1	8	1	8	Shared
group_2872	1	1	0	NA	NA	Strep. parasanguinis	1	8	1	8	Shared
nagA	1	1	0	NA	NA	Strep. parasanguinis	1	8	1	8	Shared
mscS~~~ykuT	1	1	0	NA	NA	Strep. parasanguinis	1	8	1	8	Shared
cwlO	1	1	0	NA	NA	Strep. parasanguinis	1	8	1	8	Shared
group_1335	1	1	0	NA	NA	Strep. parasanguinis	1	8	1	8	Shared
glnQ~~~artM	1	1	0	NA	NA	Strep. parasanguinis	1	8	1	8	Shared
group_19335	1	1	0	NA	NA	Strep. parasanguinis	1	8	1	8	Shared
group_2875	1	1	0	NA	NA	Strep. parasanguinis	1	8	1	8	Shared
group_2773	1	1	0	NA	NA	Strep. parasanguinis	1	8	1	8	Shared
aceF	1	1	0	NA	NA	Strep. parasanguinis	1	8	1	8	Shared
lpdA	1	1	0	NA	NA	Strep. parasanguinis	1	8	1	8	Shared
acoB	1	1	0	NA	NA	Strep. parasanguinis	1	8	1	8	Shared
lplA	1	1	0	NA	NA	Strep. parasanguinis	1	8	1	8	Shared
acoA~~~pdhA	1	1	0	NA	NA	Strep. parasanguinis	1	8	1	8	Shared
group_2474	1	1	0	NA	NA	Strep. parasanguinis	1	8	1	8	Shared
guaC	1	1	0	NA	NA	Strep. parasanguinis	1	8	1	8	Shared
plsC	1	1	0	NA	NA	Strep. parasanguinis	1	8	1	8	Shared
nlpA	1	1	0	NA	NA	Strep. parasanguinis	1	8	1	8	Shared
group_2061	1	1	0	NA	NA	Strep. parasanguinis	1	8	1	8	Shared
group_2029	1	1	0	NA	NA	Strep. parasanguinis	1	8	1	8	Shared
group_1938	1	1	0	NA	NA	Strep. parasanguinis	1	8	1	8	Shared
manO	1	0.75	0.25	1	1	Strep. parasanguinis	1	6	1	8	Shared
metN	1	1	0	NA	NA	Strep. parasanguinis	1	8	1	8	Shared
metP	1	1	0	NA	NA	Strep. parasanguinis	1	8	1	8	Shared
group_2831	1	1	0	NA	NA	Strep. parasanguinis	1	8	1	8	Shared
lrgA	0	0.625	0.625	0.444444	1	Strep. parasanguinis	0	5	1	8	Oral-specific
aliA~~~sarA~~~oppA	1	1	0	NA	NA	Strep. parasanguinis	1	8	1	8	Shared
clcA	1	1	0	NA	NA	Strep. parasanguinis	1	8	1	8	Shared
group_2215	1	0.75	0.25	1	1	Strep. parasanguinis	1	6	1	8	Shared
pyrG	1	1	0	NA	NA	Strep. parasanguinis	1	8	1	8	Shared
group_20624	0	0	0	NA	NA	Strep. parasanguinis	0	0	1	8	Absent
phoU~~~nptA	1	1	0	NA	NA	Strep. parasanguinis	1	8	1	8	Shared
group_2187	1	1	0	NA	NA	Strep. parasanguinis	1	8	1	8	Shared
ywtF~~~cps4A~~~epsA~~~lytR	1	1	0	NA	NA	Strep. parasanguinis	1	8	1	8	Shared
pepF	1	1	0	NA	NA	Strep. parasanguinis	1	8	1	8	Shared
group_3066	1	1	0	NA	NA	Strep. parasanguinis	1	8	1	8	Shared
rex	1	1	0	NA	NA	Strep. parasanguinis	1	8	1	8	Shared
yeaQ	0	0	0	NA	NA	Strep. parasanguinis	0	0	1	8	Absent
group_3028	1	1	0	NA	NA	Strep. parasanguinis	1	8	1	8	Shared
group_2921	1	1	0	NA	NA	Strep. parasanguinis	1	8	1	8	Shared
msrA~~~msrB~~~msrAB2	0	0	0	NA	NA	Strep. parasanguinis	0	0	1	8	Absent
dtd	1	1	0	NA	NA	Strep. parasanguinis	1	8	1	8	Shared
group_2705	1	1	0	NA	NA	Strep. parasanguinis	1	8	1	8	Shared
ssuE	1	1	0	NA	NA	Strep. parasanguinis	1	8	1	8	Shared
metF	1	1	0	NA	NA	Strep. parasanguinis	1	8	1	8	Shared
group_2654	1	1	0	NA	NA	Strep. parasanguinis	1	8	1	8	Shared
group_2532	1	1	0	NA	NA	Strep. parasanguinis	1	8	1	8	Shared
group_2138	1	1	0	NA	NA	Strep. parasanguinis	1	8	1	8	Shared
murB	0	0	0	NA	NA	Strep. parasanguinis	0	0	1	8	Absent
potA	0	0	0	NA	NA	Strep. parasanguinis	0	0	1	8	Absent
potB	0	0	0	NA	NA	Strep. parasanguinis	0	0	1	8	Absent
ydcV~~~potC	0	0	0	NA	NA	Strep. parasanguinis	0	0	1	8	Absent
potD	0	0	0	NA	NA	Strep. parasanguinis	0	0	1	8	Absent
rpmH	0	0.5	0.5	1	1	Strep. parasanguinis	0	4	1	8	Oral-specific
yhaQ	1	1	0	NA	NA	Strep. parasanguinis	1	8	1	8	Shared
soxR~~~merR~~~pmrA	1	1	0	NA	NA	Strep. parasanguinis	1	8	1	8	Shared
group_2302	1	0.625	0.375	1	1	Strep. parasanguinis	1	5	1	8	Shared
nanE	1	0.625	0.375	1	1	Strep. parasanguinis	1	5	1	8	Shared
cpsE~~~wcaJ~~~epsL	1	1	0	NA	NA	Strep. parasanguinis	1	8	1	8	Shared
sodA	1	1	0	NA	NA	Strep. parasanguinis	1	8	1	8	Shared
ptsN	1	0.75	0.25	1	1	Strep. parasanguinis	1	6	1	8	Shared
sgcC	1	0.75	0.25	1	1	Strep. parasanguinis	1	6	1	8	Shared
sgaB	1	0.75	0.25	1	1	Strep. parasanguinis	1	6	1	8	Shared
ganA	1	1	0	NA	NA	Strep. parasanguinis	1	8	1	8	Shared
gntR~~~ubiC	1	1	0	NA	NA	Strep. parasanguinis	1	8	1	8	Shared
group_3113	1	1	0	NA	NA	Strep. parasanguinis	1	8	1	8	Shared
lgt	1	1	0	NA	NA	Strep. parasanguinis	1	8	1	8	Shared
hprK	1	1	0	NA	NA	Strep. parasanguinis	1	8	1	8	Shared
folC	1	1	0	NA	NA	Strep. parasanguinis	1	8	1	8	Shared
nusG	1	1	0	NA	NA	Strep. parasanguinis	1	8	1	8	Shared
rluA	1	1	0	NA	NA	Strep. parasanguinis	1	8	1	8	Shared
group_2463	1	1	0	NA	NA	Strep. parasanguinis	1	8	1	8	Shared
group_2325	0	1	1	0.111111	1	Strep. parasanguinis	0	8	1	8	Oral-specific
agaS	1	1	0	NA	NA	Strep. parasanguinis	1	8	1	8	Shared
manX	1	1	0	NA	NA	Strep. parasanguinis	1	8	1	8	Shared
manZ	1	1	0	NA	NA	Strep. parasanguinis	1	8	1	8	Shared
manY	1	1	0	NA	NA	Strep. parasanguinis	1	8	1	8	Shared
agaB	1	1	0	NA	NA	Strep. parasanguinis	1	8	1	8	Shared
group_21680	1	1	0	NA	NA	Strep. parasanguinis	1	8	1	8	Shared
dpnI	0	0	0	NA	NA	Strep. parasanguinis	0	0	1	8	Absent
group_2842	1	1	0	NA	NA	Strep. parasanguinis	1	8	1	8	Shared
nupP~~~mglC	0	0	0	NA	NA	Strep. parasanguinis	0	0	1	8	Absent
nifS	1	1	0	NA	NA	Strep. parasanguinis	1	8	1	8	Shared
group_2667	0	0.75	0.75	0.333333	1	Strep. parasanguinis	0	6	1	8	Oral-specific
group_2356	0	0	0	NA	NA	Strep. parasanguinis	0	0	1	8	Absent
adk	1	1	0	NA	NA	Strep. parasanguinis	1	8	1	8	Shared
exp7~~~mgtA	1	1	0	NA	NA	Strep. parasanguinis	1	8	1	8	Shared
gltX	1	1	0	NA	NA	Strep. parasanguinis	1	8	1	8	Shared
ydaF~~~rimL	1	1	0	NA	NA	Strep. parasanguinis	1	8	1	8	Shared
skfE~~~ccmA	0	0	0	NA	NA	Strep. parasanguinis	0	0	1	8	Absent
spxB	1	1	0	NA	NA	Strep. parasanguinis	1	8	1	8	Shared
bglB~~~gmuD~~~bglA	1	1	0	NA	NA	Strep. parasanguinis	1	8	1	8	Shared
lacG	1	0.75	0.25	1	1	Strep. parasanguinis	1	6	1	8	Shared
purF	1	1	0	NA	NA	Strep. parasanguinis	1	8	1	8	Shared
group_674	1	1	0	NA	NA	Strep. parasanguinis	1	8	1	8	Shared
group_21127	1	1	0	NA	NA	Strep. parasanguinis	1	8	1	8	Shared
group_20949	1	1	0	NA	NA	Strep. parasanguinis	1	8	1	8	Shared
group_20671	1	1	0	NA	NA	Strep. parasanguinis	1	8	1	8	Shared
metK	1	1	0	NA	NA	Strep. parasanguinis	1	8	1	8	Shared
group_2798	1	1	0	NA	NA	Strep. parasanguinis	1	8	1	8	Shared
clpL~~~clpA	1	1	0	NA	NA	Strep. parasanguinis	1	8	1	8	Shared
trmL~~~trmH	0	0	0	NA	NA	Strep. parasanguinis	0	0	1	8	Absent
group_3119	0	0	0	NA	NA	Strep. parasanguinis	0	0	1	8	Absent
trkH~~~trkG	0	0	0	NA	NA	Strep. parasanguinis	0	0	1	8	Absent
group_2905	0	0	0	NA	NA	Strep. parasanguinis	0	0	1	8	Absent
niaR	0	0	0	NA	NA	Strep. parasanguinis	0	0	1	8	Absent
group_2838	0	0	0	NA	NA	Strep. parasanguinis	0	0	1	8	Absent
rfbB	1	1	0	NA	NA	Strep. parasanguinis	1	8	1	8	Shared
rfbC	1	1	0	NA	NA	Strep. parasanguinis	1	8	1	8	Shared
rfbA	1	1	0	NA	NA	Strep. parasanguinis	1	8	1	8	Shared
group_2706	1	1	0	NA	NA	Strep. parasanguinis	1	8	1	8	Shared
ppaX~~~gph	0	0	0	NA	NA	Strep. parasanguinis	0	0	1	8	Absent
group_2371	0	0	0	NA	NA	Strep. parasanguinis	0	0	1	8	Absent
pgl	0	0	0	NA	NA	Strep. parasanguinis	0	0	1	8	Absent
dprA	0	0	0	NA	NA	Strep. parasanguinis	0	0	1	8	Absent
holA	0	0	0	NA	NA	Strep. parasanguinis	0	0	1	8	Absent
trpS	0	0	0	NA	NA	Strep. parasanguinis	0	0	1	8	Absent
guaB	0	0	0	NA	NA	Strep. parasanguinis	0	0	1	8	Absent
recF	0	0	0	NA	NA	Strep. parasanguinis	0	0	1	8	Absent
group_20151	0	0	0	NA	NA	Strep. parasanguinis	0	0	1	8	Absent
rpsZ	1	1	0	NA	NA	Strep. parasanguinis	1	8	1	8	Shared
group_2816	0	0	0	NA	NA	Strep. parasanguinis	0	0	1	8	Absent
secE	1	1	0	NA	NA	Strep. parasanguinis	1	8	1	8	Shared
def	0	0	0	NA	NA	Strep. parasanguinis	0	0	1	8	Absent
panT	0	0	0	NA	NA	Strep. parasanguinis	0	0	1	8	Absent
group_2276	0	0	0	NA	NA	Strep. parasanguinis	0	0	1	8	Absent
ampS~~~pepS	1	1	0	NA	NA	Strep. parasanguinis	1	8	1	8	Shared
carA	0	0	0	NA	NA	Strep. parasanguinis	0	0	1	8	Absent
group_2168	0	0	0	NA	NA	Strep. parasanguinis	0	0	1	8	Absent
sstT	1	1	0	NA	NA	Strep. parasanguinis	1	8	1	8	Shared
group_1302	0	0	0	NA	NA	Strep. parasanguinis	0	0	1	8	Absent
group_20740	1	1	0	NA	NA	Strep. parasanguinis	1	8	1	8	Shared
group_20307	1	1	0	NA	NA	Strep. parasanguinis	1	8	1	8	Shared
group_19692	1	1	0	NA	NA	Strep. parasanguinis	1	8	1	8	Shared
group_3114	0	0	0	NA	NA	Strep. parasanguinis	0	0	1	8	Absent
scpB	0	0	0	NA	NA	Strep. parasanguinis	0	0	1	8	Absent
scpA	0	0	0	NA	NA	Strep. parasanguinis	0	0	1	8	Absent
cbpB	0	0	0	NA	NA	Strep. parasanguinis	0	0	1	8	Absent
group_3106	0	0	0	NA	NA	Strep. parasanguinis	0	0	1	8	Absent
racE	0	0	0	NA	NA	Strep. parasanguinis	0	0	1	8	Absent
group_3103	0	0	0	NA	NA	Strep. parasanguinis	0	0	1	8	Absent
amyA	0	0	0	NA	NA	Strep. parasanguinis	0	0	1	8	Absent
group_2926	1	1	0	NA	NA	Strep. parasanguinis	1	8	1	8	Shared
group_2922	1	1	0	NA	NA	Strep. parasanguinis	1	8	1	8	Shared
group_2889	0	0.125	0.125	1	1	Strep. parasanguinis	0	1	1	8	Oral-specific
ccc1	1	1	0	NA	NA	Strep. parasanguinis	1	8	1	8	Shared
group_2745	1	1	0	NA	NA	Strep. parasanguinis	1	8	1	8	Shared
pfkB	1	1	0	NA	NA	Strep. parasanguinis	1	8	1	8	Shared
lytR~~~cps2a	0	0	0	NA	NA	Strep. parasanguinis	0	0	1	8	Absent
recN	1	1	0	NA	NA	Strep. parasanguinis	1	8	1	8	Shared
xseB	1	1	0	NA	NA	Strep. parasanguinis	1	8	1	8	Shared
yqxC	1	1	0	NA	NA	Strep. parasanguinis	1	8	1	8	Shared
group_2213	1	1	0	NA	NA	Strep. parasanguinis	1	8	1	8	Shared
group_2018	1	1	0	NA	NA	Strep. parasanguinis	1	8	1	8	Shared
eamA~~~yicL	0	0	0	NA	NA	Strep. parasanguinis	0	0	1	8	Absent
deoB	1	1	0	NA	NA	Strep. parasanguinis	1	8	1	8	Shared
macP	0	0	0	NA	NA	Strep. parasanguinis	0	0	1	8	Absent
mccC~~~ldcA	1	0.75	0.25	1	1	Strep. parasanguinis	1	6	1	8	Shared
group_3018	1	1	0	NA	NA	Strep. parasanguinis	1	8	1	8	Shared
metA	0	0	0	NA	NA	Strep. parasanguinis	0	0	1	8	Absent
glmS	1	1	0	NA	NA	Strep. parasanguinis	1	8	1	8	Shared
egtUBC	1	1	0	NA	NA	Strep. parasanguinis	1	8	1	8	Shared
egtUA	1	1	0	NA	NA	Strep. parasanguinis	1	8	1	8	Shared
rny	0	0	0	NA	NA	Strep. parasanguinis	0	0	1	8	Absent
luxS	0	0	0	NA	NA	Strep. parasanguinis	0	0	1	8	Absent
lacE~~~celB	1	0.75	0.25	1	1	Strep. parasanguinis	1	6	1	8	Shared
lacF	1	0.75	0.25	1	1	Strep. parasanguinis	1	6	1	8	Shared
yqfA	0	0	0	NA	NA	Strep. parasanguinis	0	0	1	8	Absent
oatA~~~oafA	1	1	0	NA	NA	Strep. parasanguinis	1	8	1	8	Shared
group_3097	1	1	0	NA	NA	Strep. parasanguinis	1	8	1	8	Shared
eMAP	1	1	0	NA	NA	Strep. parasanguinis	1	8	1	8	Shared
pepA	1	1	0	NA	NA	Strep. parasanguinis	1	8	1	8	Shared
tpx	1	1	0	NA	NA	Strep. parasanguinis	1	8	1	8	Shared
pgk	1	1	0	NA	NA	Strep. parasanguinis	1	8	1	8	Shared
group_1420	1	1	0	NA	NA	Strep. parasanguinis	1	8	1	8	Shared
lysA	0	0	0	NA	NA	Strep. parasanguinis	0	0	1	8	Absent
glpK	1	1	0	NA	NA	Strep. parasanguinis	1	8	1	8	Shared
group_2444	1	1	0	NA	NA	Strep. parasanguinis	1	8	1	8	Shared
group_2725	1	1	0	NA	NA	Strep. parasanguinis	1	8	1	8	Shared
ugpE	1	0.625	0.375	1	1	Strep. parasanguinis	1	5	1	8	Shared
ugpB	1	0.625	0.375	1	1	Strep. parasanguinis	1	5	1	8	Shared
ssnA	0	0	0	NA	NA	Strep. parasanguinis	0	0	1	8	Absent
cpsD~~~mrp	0	0	0	NA	NA	Strep. parasanguinis	0	0	1	8	Absent
group_1598	1	1	0	NA	NA	Strep. parasanguinis	1	8	1	8	Shared
group_21542	1	1	0	NA	NA	Strep. parasanguinis	1	8	1	8	Shared
group_20219	1	1	0	NA	NA	Strep. parasanguinis	1	8	1	8	Shared
group_19557	1	1	0	NA	NA	Strep. parasanguinis	1	8	1	8	Shared
group_3109	1	1	0	NA	NA	Strep. parasanguinis	1	8	1	8	Shared
rseP~~~ftsL	1	1	0	NA	NA	Strep. parasanguinis	1	8	1	8	Shared
cdsA	1	1	0	NA	NA	Strep. parasanguinis	1	8	1	8	Shared
uppS	1	1	0	NA	NA	Strep. parasanguinis	1	8	1	8	Shared
ecfT~~~mtsC~~~cbiQ	0	0.625	0.625	0.444444	1	Strep. parasanguinis	0	5	1	8	Oral-specific
group_2627	1	1	0	NA	NA	Strep. parasanguinis	1	8	1	8	Shared
group_1411	1	1	0	NA	NA	Strep. parasanguinis	1	8	1	8	Shared
sufB	1	1	0	NA	NA	Strep. parasanguinis	1	8	1	8	Shared
group_2980	0	0	0	NA	NA	Strep. parasanguinis	0	0	1	8	Absent
macB~~~lolD	1	0.875	0.125	1	1	Strep. parasanguinis	1	7	1	8	Shared
entS	1	1	0	NA	NA	Strep. parasanguinis	1	8	1	8	Shared
lacF~~~ugpA	1	0.625	0.375	1	1	Strep. parasanguinis	1	5	1	8	Shared
group_1834	1	1	0	NA	NA	Strep. parasanguinis	1	8	1	8	Shared
group_1563	1	0.25	0.75	0.333333	1	Strep. parasanguinis	1	2	1	8	Shared
galM	0	0	0	NA	NA	Strep. parasanguinis	0	0	1	8	Absent
paaD	1	1	0	NA	NA	Strep. parasanguinis	1	8	1	8	Shared
group_3098	1	1	0	NA	NA	Strep. parasanguinis	1	8	1	8	Shared
rfbX~~~matE	1	0.25	0.75	0.333333	1	Strep. parasanguinis	1	2	1	8	Shared
comE~~~comEB	1	1	0	NA	NA	Strep. parasanguinis	1	8	1	8	Shared
ykgJ	1	1	0	NA	NA	Strep. parasanguinis	1	8	1	8	Shared
group_2830	1	1	0	NA	NA	Strep. parasanguinis	1	8	1	8	Shared
group_2806	1	1	0	NA	NA	Strep. parasanguinis	1	8	1	8	Shared
mutX	1	1	0	NA	NA	Strep. parasanguinis	1	8	1	8	Shared
pyrC~~~allB	1	1	0	NA	NA	Strep. parasanguinis	1	8	1	8	Shared
cshB~~~srmB	1	1	0	NA	NA	Strep. parasanguinis	1	8	1	8	Shared
yajC	1	1	0	NA	NA	Strep. parasanguinis	1	8	1	8	Shared
map	1	1	0	NA	NA	Strep. parasanguinis	1	8	1	8	Shared
deoR~~~glpR	1	1	0	NA	NA	Strep. parasanguinis	1	8	1	8	Shared
group_2434	1	1	0	NA	NA	Strep. parasanguinis	1	8	1	8	Shared
murA2~~~murA	1	1	0	NA	NA	Strep. parasanguinis	1	8	1	8	Shared
pheS	1	1	0	NA	NA	Strep. parasanguinis	1	8	1	8	Shared
group_2175	1	1	0	NA	NA	Strep. parasanguinis	1	8	1	8	Shared
xseA	1	1	0	NA	NA	Strep. parasanguinis	1	8	1	8	Shared
group_1761	1	1	0	NA	NA	Strep. parasanguinis	1	8	1	8	Shared
group_1716	1	1	0	NA	NA	Strep. parasanguinis	1	8	1	8	Shared
typA	1	1	0	NA	NA	Strep. parasanguinis	1	8	1	8	Shared
thrS~~~adk	1	1	0	NA	NA	Strep. parasanguinis	1	8	1	8	Shared
glpE~~~moeZ~~~pspE	1	1	0	NA	NA	Strep. parasanguinis	1	8	1	8	Shared
yqgQ	1	1	0	NA	NA	Strep. parasanguinis	1	8	1	8	Shared
zinT~~~adcA~~~yodA	1	1	0	NA	NA	Strep. parasanguinis	1	8	1	8	Shared
znuB	1	1	0	NA	NA	Strep. parasanguinis	1	8	1	8	Shared
leuB	1	1	0	NA	NA	Strep. parasanguinis	1	8	1	8	Shared
leuA	1	1	0	NA	NA	Strep. parasanguinis	1	8	1	8	Shared
group_1572	1	1	0	NA	NA	Strep. parasanguinis	1	8	1	8	Shared
znuC~~~adcC	1	1	0	NA	NA	Strep. parasanguinis	1	8	1	8	Shared
leuC	1	1	0	NA	NA	Strep. parasanguinis	1	8	1	8	Shared
leuD	1	1	0	NA	NA	Strep. parasanguinis	1	8	1	8	Shared
tsaC	1	1	0	NA	NA	Strep. parasanguinis	1	8	1	8	Shared
group_3005	1	1	0	NA	NA	Strep. parasanguinis	1	8	1	8	Shared
metC	1	1	0	NA	NA	Strep. parasanguinis	1	8	1	8	Shared
group_2832	0	0	0	NA	NA	Strep. parasanguinis	0	0	1	8	Absent
azlC	0	0	0	NA	NA	Strep. parasanguinis	0	0	1	8	Absent
group_2565	1	1	0	NA	NA	Strep. parasanguinis	1	8	1	8	Shared
dps	1	1	0	NA	NA	Strep. parasanguinis	1	8	1	8	Shared
group_1987	1	1	0	NA	NA	Strep. parasanguinis	1	8	1	8	Shared
group_1949	1	1	0	NA	NA	Strep. parasanguinis	1	8	1	8	Shared
murG	1	1	0	NA	NA	Strep. parasanguinis	1	8	1	8	Shared
murD	1	1	0	NA	NA	Strep. parasanguinis	1	8	1	8	Shared
folD	1	1	0	NA	NA	Strep. parasanguinis	1	8	1	8	Shared
ykuJ	1	1	0	NA	NA	Strep. parasanguinis	1	8	1	8	Shared
clpA~~~clpE	1	1	0	NA	NA	Strep. parasanguinis	1	8	1	8	Shared
group_3009	0	0.875	0.875	0.222222	1	Strep. parasanguinis	0	7	1	8	Oral-specific
yecS~~~hisM	0	0.875	0.875	0.222222	1	Strep. parasanguinis	0	7	1	8	Oral-specific
hmpT~~~pdxU2~~~eCFS	0	0	0	NA	NA	Strep. parasanguinis	0	0	1	8	Absent
group_2230	1	1	0	NA	NA	Strep. parasanguinis	1	8	1	8	Shared
group_1765	1	1	0	NA	NA	Strep. parasanguinis	1	8	1	8	Shared
lacT~~~bglG	0	0	0	NA	NA	Strep. parasanguinis	0	0	1	8	Absent
czcD	1	1	0	NA	NA	Strep. parasanguinis	1	8	1	8	Shared
group_20936	1	1	0	NA	NA	Strep. parasanguinis	1	8	1	8	Shared
phnB	1	0.875	0.125	1	1	Strep. parasanguinis	1	7	1	8	Shared
group_20645	1	1	0	NA	NA	Strep. parasanguinis	1	8	1	8	Shared
group_20184	1	1	0	NA	NA	Strep. parasanguinis	1	8	1	8	Shared
fmnP	0	0	0	NA	NA	Strep. parasanguinis	0	0	1	8	Absent
hemH	0	0.625	0.625	0.444444	1	Strep. parasanguinis	0	5	1	8	Oral-specific
fabZ~~~paaI	1	1	0	NA	NA	Strep. parasanguinis	1	8	1	8	Shared
group_2732	1	1	0	NA	NA	Strep. parasanguinis	1	8	1	8	Shared
group_2630	1	0.625	0.375	1	1	Strep. parasanguinis	1	5	1	8	Shared
group_2619	1	0.625	0.375	1	1	Strep. parasanguinis	1	5	1	8	Shared
sepM~~~coaD~~~sdrC	0	0	0	NA	NA	Strep. parasanguinis	0	0	1	8	Absent
group_2542	0	0	0	NA	NA	Strep. parasanguinis	0	0	1	8	Absent
pTC1~~~phpP	0	0	0	NA	NA	Strep. parasanguinis	0	0	1	8	Absent
rsmB	0	0	0	NA	NA	Strep. parasanguinis	0	0	1	8	Absent
group_2223	0	0	0	NA	NA	Strep. parasanguinis	0	0	1	8	Absent
fmt	0	0	0	NA	NA	Strep. parasanguinis	0	0	1	8	Absent
group_2009	0	0	0	NA	NA	Strep. parasanguinis	0	0	1	8	Absent
group_1893	1	1	0	NA	NA	Strep. parasanguinis	1	8	1	8	Shared
rpoZ	0	0	0	NA	NA	Strep. parasanguinis	0	0	1	8	Absent
group_1805	0	0	0	NA	NA	Strep. parasanguinis	0	0	1	8	Absent
group_1763	0	0	0	NA	NA	Strep. parasanguinis	0	0	1	8	Absent
gmk	0	0	0	NA	NA	Strep. parasanguinis	0	0	1	8	Absent
group_1535	0	0	0	NA	NA	Strep. parasanguinis	0	0	1	8	Absent
comF~~~recG~~~comFA	0	0	0	NA	NA	Strep. parasanguinis	0	0	1	8	Absent
yigZ~~~yIH1	0	0	0	NA	NA	Strep. parasanguinis	0	0	1	8	Absent
cysK	0	0	0	NA	NA	Strep. parasanguinis	0	0	1	8	Absent
ylbG	0	0	0	NA	NA	Strep. parasanguinis	0	0	1	8	Absent
acpP	0	0	0	NA	NA	Strep. parasanguinis	0	0	1	8	Absent
gsiA	0	0.625	0.625	0.444444	1	Strep. parasanguinis	0	5	1	8	Oral-specific
ytpP~~~trxA	1	1	0	NA	NA	Strep. parasanguinis	1	8	1	8	Shared
group_3051	1	1	0	NA	NA	Strep. parasanguinis	1	8	1	8	Shared
groL	1	1	0	NA	NA	Strep. parasanguinis	1	8	1	8	Shared
groES	1	1	0	NA	NA	Strep. parasanguinis	1	8	1	8	Shared
gntR~~~ytrA~~~yhcF	0	0	0	NA	NA	Strep. parasanguinis	0	0	1	8	Absent
group_2189	1	1	0	NA	NA	Strep. parasanguinis	1	8	1	8	Shared
group_2079	0	0.625	0.625	0.444444	1	Strep. parasanguinis	0	5	1	8	Oral-specific
group_1336	1	1	0	NA	NA	Strep. parasanguinis	1	8	1	8	Shared
tauC	1	1	0	NA	NA	Strep. parasanguinis	1	8	1	8	Shared
tyrS	1	1	0	NA	NA	Strep. parasanguinis	1	8	1	8	Shared
group_2809	1	1	0	NA	NA	Strep. parasanguinis	1	8	1	8	Shared
mntH	1	1	0	NA	NA	Strep. parasanguinis	1	8	1	8	Shared
ywnA~~~iscR	1	1	0	NA	NA	Strep. parasanguinis	1	8	1	8	Shared
rgfB~~~elsH	1	1	0	NA	NA	Strep. parasanguinis	1	8	1	8	Shared
marR~~~mgrA	1	1	0	NA	NA	Strep. parasanguinis	1	8	1	8	Shared
group_2184	1	1	0	NA	NA	Strep. parasanguinis	1	8	1	8	Shared
group_2133	1	1	0	NA	NA	Strep. parasanguinis	1	8	1	8	Shared
udp	1	1	0	NA	NA	Strep. parasanguinis	1	8	1	8	Shared
frmB	1	1	0	NA	NA	Strep. parasanguinis	1	8	1	8	Shared
focA	0	0	0	NA	NA	Strep. parasanguinis	0	0	1	8	Absent
phoE	1	1	0	NA	NA	Strep. parasanguinis	1	8	1	8	Shared
ansP	1	1	0	NA	NA	Strep. parasanguinis	1	8	1	8	Shared
dexB	1	1	0	NA	NA	Strep. parasanguinis	1	8	1	8	Shared
group_2874	1	1	0	NA	NA	Strep. parasanguinis	1	8	1	8	Shared
group_2864	1	1	0	NA	NA	Strep. parasanguinis	1	8	1	8	Shared
rggC~~~mutR	1	1	0	NA	NA	Strep. parasanguinis	1	8	1	8	Shared
femA~~~murN	1	0.75	0.25	1	1	Strep. parasanguinis	1	6	1	8	Shared
group_1388	1	0.25	0.75	0.333333	1	Strep. parasanguinis	1	2	1	8	Shared
group_2857	1	1	0	NA	NA	Strep. parasanguinis	1	8	1	8	Shared
group_2644	1	0.75	0.25	1	1	Strep. parasanguinis	1	6	1	8	Shared
group_2622	1	1	0	NA	NA	Strep. parasanguinis	1	8	1	8	Shared
spxR~~~fabZ	1	1	0	NA	NA	Strep. parasanguinis	1	8	1	8	Shared
group_1552	1	1	0	NA	NA	Strep. parasanguinis	1	8	1	8	Shared
group_7075	1	1	0	NA	NA	Strep. parasanguinis	1	8	1	8	Shared
group_3069	1	1	0	NA	NA	Strep. parasanguinis	1	8	1	8	Shared
nrdI	1	0.875	0.125	1	1	Strep. parasanguinis	1	7	1	8	Shared
group_2517	1	1	0	NA	NA	Strep. parasanguinis	1	8	1	8	Shared
queT	1	1	0	NA	NA	Strep. parasanguinis	1	8	1	8	Shared
group_847	0	0	0	NA	NA	Strep. parasanguinis	0	0	1	8	Absent
yidD	0	0	0	NA	NA	Strep. parasanguinis	0	0	1	8	Absent
glmM	1	1	0	NA	NA	Strep. parasanguinis	1	8	1	8	Shared
group_2755	1	1	0	NA	NA	Strep. parasanguinis	1	8	1	8	Shared
group_2736	1	1	0	NA	NA	Strep. parasanguinis	1	8	1	8	Shared
group_2377	1	1	0	NA	NA	Strep. parasanguinis	1	8	1	8	Shared
group_2351	1	1	0	NA	NA	Strep. parasanguinis	1	8	1	8	Shared
group_2256	1	0.625	0.375	1	1	Strep. parasanguinis	1	5	1	8	Shared
adhP	1	1	0	NA	NA	Strep. parasanguinis	1	8	1	8	Shared
aspB~~~alaT	1	1	0	NA	NA	Strep. parasanguinis	1	8	1	8	Shared
codY	1	1	0	NA	NA	Strep. parasanguinis	1	8	1	8	Shared
pncA~~~yecD	1	1	0	NA	NA	Strep. parasanguinis	1	8	1	8	Shared
gatC	1	1	0	NA	NA	Strep. parasanguinis	1	8	1	8	Shared
gatA	1	1	0	NA	NA	Strep. parasanguinis	1	8	1	8	Shared
gatB	1	1	0	NA	NA	Strep. parasanguinis	1	8	1	8	Shared
ybaB	1	1	0	NA	NA	Strep. parasanguinis	1	8	1	8	Shared
group_2511	1	1	0	NA	NA	Strep. parasanguinis	1	8	1	8	Shared
ypuA	1	1	0	NA	NA	Strep. parasanguinis	1	8	1	8	Shared
group_1839	1	0.875	0.125	1	1	Strep. parasanguinis	1	7	1	8	Shared
yqjI~~~padR	0	0	0	NA	NA	Strep. parasanguinis	0	0	1	8	Absent
acrR~~~tetR	1	1	0	NA	NA	Strep. parasanguinis	1	8	1	8	Shared
tesA	0	0	0	NA	NA	Strep. parasanguinis	0	0	1	8	Absent
glnR~~~merR	1	0.875	0.125	1	1	Strep. parasanguinis	1	7	1	8	Shared
ygaE	1	0.875	0.125	1	1	Strep. parasanguinis	1	7	1	8	Shared
group_21453	1	1	0	NA	NA	Strep. parasanguinis	1	8	1	8	Shared
group_6963	1	1	0	NA	NA	Strep. parasanguinis	1	8	1	8	Shared
pstS	1	1	0	NA	NA	Strep. parasanguinis	1	8	1	8	Shared
frvX	1	0.75	0.25	1	1	Strep. parasanguinis	1	6	1	8	Shared
pstA	1	1	0	NA	NA	Strep. parasanguinis	1	8	1	8	Shared
group_2817	1	1	0	NA	NA	Strep. parasanguinis	1	8	1	8	Shared
pstB	1	1	0	NA	NA	Strep. parasanguinis	1	8	1	8	Shared
group_2646	1	1	0	NA	NA	Strep. parasanguinis	1	8	1	8	Shared
rocS	1	1	0	NA	NA	Strep. parasanguinis	1	8	1	8	Shared
group_2620	1	1	0	NA	NA	Strep. parasanguinis	1	8	1	8	Shared
tehA	1	1	0	NA	NA	Strep. parasanguinis	1	8	1	8	Shared
group_1576	1	1	0	NA	NA	Strep. parasanguinis	1	8	1	8	Shared
mnaT	1	1	0	NA	NA	Strep. parasanguinis	1	8	1	8	Shared
lctO	1	0.125	0.875	0.222222	1	Strep. parasanguinis	1	1	1	8	Shared
group_20118	1	1	0	NA	NA	Strep. parasanguinis	1	8	1	8	Shared
group_3087	1	1	0	NA	NA	Strep. parasanguinis	1	8	1	8	Shared
group_2965	1	1	0	NA	NA	Strep. parasanguinis	1	8	1	8	Shared
group_2684	1	1	0	NA	NA	Strep. parasanguinis	1	8	1	8	Shared
mraW	1	1	0	NA	NA	Strep. parasanguinis	1	8	1	8	Shared
group_2683	1	1	0	NA	NA	Strep. parasanguinis	1	8	1	8	Shared
nhaP	1	1	0	NA	NA	Strep. parasanguinis	1	8	1	8	Shared
treC	0	0.875	0.875	0.222222	1	Strep. parasanguinis	0	7	1	8	Oral-specific
nadR	1	1	0	NA	NA	Strep. parasanguinis	1	8	1	8	Shared
ald	1	1	0	NA	NA	Strep. parasanguinis	1	8	1	8	Shared
axe1	1	1	0	NA	NA	Strep. parasanguinis	1	8	1	8	Shared
group_1136	0	0	0	NA	NA	Strep. parasanguinis	0	0	1	8	Absent
group_21375	0	0	0	NA	NA	Strep. parasanguinis	0	0	1	8	Absent
group_21328	0	0	0	NA	NA	Strep. parasanguinis	0	0	1	8	Absent
group_21314	0	0	0	NA	NA	Strep. parasanguinis	0	0	1	8	Absent
galT2~~~galT	0	0	0	NA	NA	Strep. parasanguinis	0	0	1	8	Absent
group_21128	0	0	0	NA	NA	Strep. parasanguinis	0	0	1	8	Absent
group_19418	0	0	0	NA	NA	Strep. parasanguinis	0	0	1	8	Absent
group_3070	0	0	0	NA	NA	Strep. parasanguinis	0	0	1	8	Absent
yheI~~~msbA~~~mdlB~~~patA	0	0	0	NA	NA	Strep. parasanguinis	0	0	1	8	Absent
group_2934	0	0	0	NA	NA	Strep. parasanguinis	0	0	1	8	Absent
arcA	1	1	0	NA	NA	Strep. parasanguinis	1	8	1	8	Shared
group_2930	1	1	0	NA	NA	Strep. parasanguinis	1	8	1	8	Shared
yfcC~~~arcD	1	1	0	NA	NA	Strep. parasanguinis	1	8	1	8	Shared
arcC	1	1	0	NA	NA	Strep. parasanguinis	1	8	1	8	Shared
pnuC	1	0.875	0.125	1	1	Strep. parasanguinis	1	7	1	8	Shared
puuD	1	1	0	NA	NA	Strep. parasanguinis	1	8	1	8	Shared
moeZ~~~pspE	1	1	0	NA	NA	Strep. parasanguinis	1	8	1	8	Shared
ispA	0	0	0	NA	NA	Strep. parasanguinis	0	0	1	8	Absent
group_1804	0	0	0	NA	NA	Strep. parasanguinis	0	0	1	8	Absent
group_1771	0	0	0	NA	NA	Strep. parasanguinis	0	0	1	8	Absent
marR~~~adcR	0	0	0	NA	NA	Strep. parasanguinis	0	0	1	8	Absent
tauB	0	0	0	NA	NA	Strep. parasanguinis	0	0	1	8	Absent
group_21245	0	0	0	NA	NA	Strep. parasanguinis	0	0	1	8	Absent
sdbB	0	0	0	NA	NA	Strep. parasanguinis	0	0	1	8	Absent
mutT	1	1	0	NA	NA	Strep. parasanguinis	1	8	1	8	Shared
aF0785	1	0.25	0.75	0.333333	1	Strep. parasanguinis	1	2	1	8	Shared
group_3121	0	0	0	NA	NA	Strep. parasanguinis	0	0	1	8	Absent
argF	1	1	0	NA	NA	Strep. parasanguinis	1	8	1	8	Shared
group_2759	0	0	0	NA	NA	Strep. parasanguinis	0	0	1	8	Absent
group_2482	1	0.625	0.375	1	1	Strep. parasanguinis	1	5	1	8	Shared
eCFS	0	0	0	NA	NA	Strep. parasanguinis	0	0	1	8	Absent
glyP~~~alsT	1	1	0	NA	NA	Strep. parasanguinis	1	8	1	8	Shared
group_1312	1	0.375	0.625	0.444444	1	Strep. parasanguinis	1	3	1	8	Shared
group_21273	1	0.75	0.25	1	1	Strep. parasanguinis	1	6	1	8	Shared
araQ~~~ugpE	1	0.75	0.25	1	1	Strep. parasanguinis	1	6	1	8	Shared
group_21025	1	0.75	0.25	1	1	Strep. parasanguinis	1	6	1	8	Shared
group_20781	1	0.75	0.25	1	1	Strep. parasanguinis	1	6	1	8	Shared
group_20387	1	0.75	0.25	1	1	Strep. parasanguinis	1	6	1	8	Shared
group_3053	1	0.25	0.75	0.333333	1	Strep. parasanguinis	1	2	1	8	Shared
group_2358	1	1	0	NA	NA	Strep. parasanguinis	1	8	1	8	Shared
group_2341	0	0.625	0.625	0.444444	1	Strep. parasanguinis	0	5	1	8	Oral-specific
group_2340	0	0	0	NA	NA	Strep. parasanguinis	0	0	1	8	Absent
group_1920	1	0.875	0.125	1	1	Strep. parasanguinis	1	7	1	8	Shared
yfcE	1	1	0	NA	NA	Strep. parasanguinis	1	8	1	8	Shared
group_493	1	0.75	0.25	1	1	Strep. parasanguinis	1	6	1	8	Shared
mngB	1	0.75	0.25	1	1	Strep. parasanguinis	1	6	1	8	Shared
yitW	1	1	0	NA	NA	Strep. parasanguinis	1	8	1	8	Shared
group_20317	1	1	0	NA	NA	Strep. parasanguinis	1	8	1	8	Shared
group_19697	1	1	0	NA	NA	Strep. parasanguinis	1	8	1	8	Shared
group_7054	1	1	0	NA	NA	Strep. parasanguinis	1	8	1	8	Shared
ssuB	1	1	0	NA	NA	Strep. parasanguinis	1	8	1	8	Shared
group_2997	1	1	0	NA	NA	Strep. parasanguinis	1	8	1	8	Shared
dnaI	1	1	0	NA	NA	Strep. parasanguinis	1	8	1	8	Shared
group_2938	1	1	0	NA	NA	Strep. parasanguinis	1	8	1	8	Shared
nrdR	1	1	0	NA	NA	Strep. parasanguinis	1	8	1	8	Shared
group_2763	1	1	0	NA	NA	Strep. parasanguinis	1	8	1	8	Shared
group_2408	1	1	0	NA	NA	Strep. parasanguinis	1	8	1	8	Shared
group_2406	1	1	0	NA	NA	Strep. parasanguinis	1	8	1	8	Shared
queH	0	0	0	NA	NA	Strep. parasanguinis	0	0	1	8	Absent
group_1697	1	1	0	NA	NA	Strep. parasanguinis	1	8	1	8	Shared
group_1107	1	1	0	NA	NA	Strep. parasanguinis	1	8	1	8	Shared
rgpG	1	1	0	NA	NA	Strep. parasanguinis	1	8	1	8	Shared
ebsA	1	1	0	NA	NA	Strep. parasanguinis	1	8	1	8	Shared
glpF	0	0	0	NA	NA	Strep. parasanguinis	0	0	1	8	Absent
lacI~~~galR~~~purR	0	0	0	NA	NA	Strep. parasanguinis	0	0	1	8	Absent
group_19108	1	0.75	0.25	1	1	Strep. parasanguinis	1	6	1	8	Shared
group_2964	0	0	0	NA	NA	Strep. parasanguinis	0	0	1	8	Absent
group_2939	0	0	0	NA	NA	Strep. parasanguinis	0	0	1	8	Absent
group_2896	0	0	0	NA	NA	Strep. parasanguinis	0	0	1	8	Absent
tqsA	0	0	0	NA	NA	Strep. parasanguinis	0	0	1	8	Absent
group_2868	0	0	0	NA	NA	Strep. parasanguinis	0	0	1	8	Absent
group_2780	1	1	0	NA	NA	Strep. parasanguinis	1	8	1	8	Shared
group_2645	1	1	0	NA	NA	Strep. parasanguinis	1	8	1	8	Shared
rdgB	0	0	0	NA	NA	Strep. parasanguinis	0	0	1	8	Absent
lacI~~~malR~~~purR	0	0	0	NA	NA	Strep. parasanguinis	0	0	1	8	Absent
malD	0	0	0	NA	NA	Strep. parasanguinis	0	0	1	8	Absent
group_2376	1	1	0	NA	NA	Strep. parasanguinis	1	8	1	8	Shared
malC	0	0	0	NA	NA	Strep. parasanguinis	0	0	1	8	Absent
malX	0	0	0	NA	NA	Strep. parasanguinis	0	0	1	8	Absent
malQ	0	0	0	NA	NA	Strep. parasanguinis	0	0	1	8	Absent
malP~~~glgP	0	0	0	NA	NA	Strep. parasanguinis	0	0	1	8	Absent
queA	0	0	0	NA	NA	Strep. parasanguinis	0	0	1	8	Absent
saeR	0	0	0	NA	NA	Strep. parasanguinis	0	0	1	8	Absent
pavB	0	0	0	NA	NA	Strep. parasanguinis	0	0	1	8	Absent
btuE	1	1	0	NA	NA	Strep. parasanguinis	1	8	1	8	Shared
xerC	0	0.5	0.5	1	1	Strep. parasanguinis	0	4	1	8	Oral-specific
group_1114	1	1	0	NA	NA	Strep. parasanguinis	1	8	1	8	Shared
group_17988	1	0.75	0.25	1	1	Strep. parasanguinis	1	6	1	8	Shared
yheS~~~msr~~~msrD	1	0.75	0.25	1	1	Strep. parasanguinis	1	6	1	8	Shared
group_14281	1	0.75	0.25	1	1	Strep. parasanguinis	1	6	1	8	Shared
group_12357	1	0.75	0.25	1	1	Strep. parasanguinis	1	6	1	8	Shared
group_7085	1	1	0	NA	NA	Strep. parasanguinis	1	8	1	8	Shared
group_7057	1	1	0	NA	NA	Strep. parasanguinis	1	8	1	8	Shared
walK	0	0	0	NA	NA	Strep. parasanguinis	0	0	1	8	Absent
rutF	1	1	0	NA	NA	Strep. parasanguinis	1	8	1	8	Shared
clpX	1	1	0	NA	NA	Strep. parasanguinis	1	8	1	8	Shared
yihA	1	1	0	NA	NA	Strep. parasanguinis	1	8	1	8	Shared
group_2932	1	1	0	NA	NA	Strep. parasanguinis	1	8	1	8	Shared
yheH	1	1	0	NA	NA	Strep. parasanguinis	1	8	1	8	Shared
trxA	1	1	0	NA	NA	Strep. parasanguinis	1	8	1	8	Shared
group_2802	1	1	0	NA	NA	Strep. parasanguinis	1	8	1	8	Shared
group_2801	1	1	0	NA	NA	Strep. parasanguinis	1	8	1	8	Shared
budA	1	1	0	NA	NA	Strep. parasanguinis	1	8	1	8	Shared
group_2784	1	1	0	NA	NA	Strep. parasanguinis	1	8	1	8	Shared
arcR	1	1	0	NA	NA	Strep. parasanguinis	1	8	1	8	Shared
ygaC	1	1	0	NA	NA	Strep. parasanguinis	1	8	1	8	Shared
cdaA	1	1	0	NA	NA	Strep. parasanguinis	1	8	1	8	Shared
group_2399	1	1	0	NA	NA	Strep. parasanguinis	1	8	1	8	Shared
group_2306	1	1	0	NA	NA	Strep. parasanguinis	1	8	1	8	Shared
group_2110	1	1	0	NA	NA	Strep. parasanguinis	1	8	1	8	Shared
group_2010	1	1	0	NA	NA	Strep. parasanguinis	1	8	1	8	Shared
group_1986	1	1	0	NA	NA	Strep. parasanguinis	1	8	1	8	Shared
group_1971	1	1	0	NA	NA	Strep. parasanguinis	1	8	1	8	Shared
group_1918	1	1	0	NA	NA	Strep. parasanguinis	1	8	1	8	Shared
group_1862	1	1	0	NA	NA	Strep. parasanguinis	1	8	1	8	Shared
group_1835	1	1	0	NA	NA	Strep. parasanguinis	1	8	1	8	Shared
recR	1	1	0	NA	NA	Strep. parasanguinis	1	8	1	8	Shared
thrE	1	1	0	NA	NA	Strep. parasanguinis	1	8	1	8	Shared
ydaF	1	1	0	NA	NA	Strep. parasanguinis	1	8	1	8	Shared
phoH	1	1	0	NA	NA	Strep. parasanguinis	1	8	1	8	Shared
pbp2b	1	1	0	NA	NA	Strep. parasanguinis	1	8	1	8	Shared
yozE	1	1	0	NA	NA	Strep. parasanguinis	1	8	1	8	Shared
cvfB	1	1	0	NA	NA	Strep. parasanguinis	1	8	1	8	Shared
group_1732	1	1	0	NA	NA	Strep. parasanguinis	1	8	1	8	Shared
tagH	1	1	0	NA	NA	Strep. parasanguinis	1	8	1	8	Shared
frr	1	1	0	NA	NA	Strep. parasanguinis	1	8	1	8	Shared
pyrH	1	1	0	NA	NA	Strep. parasanguinis	1	8	1	8	Shared
group_1501	1	1	0	NA	NA	Strep. parasanguinis	1	8	1	8	Shared
wfgD~~~wcaA	1	1	0	NA	NA	Strep. parasanguinis	1	8	1	8	Shared
rgpA~~~rfaB	1	1	0	NA	NA	Strep. parasanguinis	1	8	1	8	Shared
pgsA	1	1	0	NA	NA	Strep. parasanguinis	1	8	1	8	Shared
ecfA2	1	1	0	NA	NA	Strep. parasanguinis	1	8	1	8	Shared
ecfT	1	1	0	NA	NA	Strep. parasanguinis	1	8	1	8	Shared
wbbJ	1	1	0	NA	NA	Strep. parasanguinis	1	8	1	8	Shared
group_1009	1	1	0	NA	NA	Strep. parasanguinis	1	8	1	8	Shared
lCB5	1	1	0	NA	NA	Strep. parasanguinis	1	8	1	8	Shared
group_924	0	1	1	0.111111	1	Strep. parasanguinis	0	8	1	8	Oral-specific
mecA	1	1	0	NA	NA	Strep. parasanguinis	1	8	1	8	Shared
ydbC	1	1	0	NA	NA	Strep. parasanguinis	1	8	1	8	Shared
group_2928	1	0.875	0.125	1	1	Strep. parasanguinis	1	7	1	8	Shared
rbfA	1	1	0	NA	NA	Strep. parasanguinis	1	8	1	8	Shared
catE	0	0	0	NA	NA	Strep. parasanguinis	0	0	1	8	Absent
rlmD	1	1	0	NA	NA	Strep. parasanguinis	1	8	1	8	Shared
group_2661	0	0.25	0.25	1	1	Strep. parasanguinis	0	2	1	8	Oral-specific
trmFO	1	1	0	NA	NA	Strep. parasanguinis	1	8	1	8	Shared
group_2395	1	1	0	NA	NA	Strep. parasanguinis	1	8	1	8	Shared
group_2394	1	1	0	NA	NA	Strep. parasanguinis	1	8	1	8	Shared
group_1756	1	1	0	NA	NA	Strep. parasanguinis	1	8	1	8	Shared
group_1630	1	0.875	0.125	1	1	Strep. parasanguinis	1	7	1	8	Shared
group_1183	1	1	0	NA	NA	Strep. parasanguinis	1	8	1	8	Shared
group_1031	1	1	0	NA	NA	Strep. parasanguinis	1	8	1	8	Shared
yidA	1	1	0	NA	NA	Strep. parasanguinis	1	8	1	8	Shared
group_19361	0	0	0	NA	NA	Strep. parasanguinis	0	0	1	8	Absent
group_3012	1	1	0	NA	NA	Strep. parasanguinis	1	8	1	8	Shared
group_3000	1	1	0	NA	NA	Strep. parasanguinis	1	8	1	8	Shared
group_2916	1	1	0	NA	NA	Strep. parasanguinis	1	8	1	8	Shared
group_2803	1	0.75	0.25	1	1	Strep. parasanguinis	1	6	1	8	Shared
phoU	1	1	0	NA	NA	Strep. parasanguinis	1	8	1	8	Shared
treR~~~gntR	0	1	1	0.111111	1	Strep. parasanguinis	0	8	1	8	Oral-specific
group_2624	1	1	0	NA	NA	Strep. parasanguinis	1	8	1	8	Shared
ylxR	1	1	0	NA	NA	Strep. parasanguinis	1	8	1	8	Shared
group_2618	1	1	0	NA	NA	Strep. parasanguinis	1	8	1	8	Shared
group_2617	1	1	0	NA	NA	Strep. parasanguinis	1	8	1	8	Shared
group_2616	1	1	0	NA	NA	Strep. parasanguinis	1	8	1	8	Shared
group_2607	1	1	0	NA	NA	Strep. parasanguinis	1	8	1	8	Shared
trmB	1	1	0	NA	NA	Strep. parasanguinis	1	8	1	8	Shared
rimP	1	1	0	NA	NA	Strep. parasanguinis	1	8	1	8	Shared
nusA	1	1	0	NA	NA	Strep. parasanguinis	1	8	1	8	Shared
group_2569	1	1	0	NA	NA	Strep. parasanguinis	1	8	1	8	Shared
group_2568	1	1	0	NA	NA	Strep. parasanguinis	1	8	1	8	Shared
group_2530	1	1	0	NA	NA	Strep. parasanguinis	1	8	1	8	Shared
group_2505	1	1	0	NA	NA	Strep. parasanguinis	1	8	1	8	Shared
group_2432	1	1	0	NA	NA	Strep. parasanguinis	1	8	1	8	Shared
group_2431	1	1	0	NA	NA	Strep. parasanguinis	1	8	1	8	Shared
ebgC	1	0.625	0.375	1	1	Strep. parasanguinis	1	5	1	8	Shared
yciW	0	0	0	NA	NA	Strep. parasanguinis	0	0	1	8	Absent
group_7010	1	1	0	NA	NA	Strep. parasanguinis	1	8	1	8	Shared
lytN~~~lysM	1	1	0	NA	NA	Strep. parasanguinis	1	8	1	8	Shared
yadH	1	1	0	NA	NA	Strep. parasanguinis	1	8	1	8	Shared
group_3015	1	1	0	NA	NA	Strep. parasanguinis	1	8	1	8	Shared
yjaB~~~rimI	1	0.75	0.25	1	1	Strep. parasanguinis	1	6	1	8	Shared
efeO	1	1	0	NA	NA	Strep. parasanguinis	1	8	1	8	Shared
group_2533	0	0	0	NA	NA	Strep. parasanguinis	0	0	1	8	Absent
group_2323	1	1	0	NA	NA	Strep. parasanguinis	1	8	1	8	Shared
group_2259	1	0.375	0.625	0.444444	1	Strep. parasanguinis	1	3	1	8	Shared
group_2203	1	1	0	NA	NA	Strep. parasanguinis	1	8	1	8	Shared
group_2109	1	1	0	NA	NA	Strep. parasanguinis	1	8	1	8	Shared
group_1992	1	0.75	0.25	1	1	Strep. parasanguinis	1	6	1	8	Shared
rae1~~~yacP	1	1	0	NA	NA	Strep. parasanguinis	1	8	1	8	Shared
group_1294	1	0.375	0.625	0.444444	1	Strep. parasanguinis	1	3	1	8	Shared
group_40	0	0.25	0.25	1	1	Strep. parasanguinis	0	2	1	8	Oral-specific
group_19694	0	0	0	NA	NA	Strep. parasanguinis	0	0	1	8	Absent
group_18651	0	0	0	NA	NA	Strep. parasanguinis	0	0	1	8	Absent
group_18650	0	0	0	NA	NA	Strep. parasanguinis	0	0	1	8	Absent
group_16932	0	0	0	NA	NA	Strep. parasanguinis	0	0	1	8	Absent
group_2920	1	1	0	NA	NA	Strep. parasanguinis	1	8	1	8	Shared
csoR	0	0	0	NA	NA	Strep. parasanguinis	0	0	1	8	Absent
group_2735	0	0	0	NA	NA	Strep. parasanguinis	0	0	1	8	Absent
uraA	0	0	0	NA	NA	Strep. parasanguinis	0	0	1	8	Absent
group_2496	1	1	0	NA	NA	Strep. parasanguinis	1	8	1	8	Shared
group_2226	0	0	0	NA	NA	Strep. parasanguinis	0	0	1	8	Absent
group_2160	1	0.875	0.125	1	1	Strep. parasanguinis	1	7	1	8	Shared
group_2098	1	1	0	NA	NA	Strep. parasanguinis	1	8	1	8	Shared
group_2074	1	0.75	0.25	1	1	Strep. parasanguinis	1	6	1	8	Shared
group_1692	0	0	0	NA	NA	Strep. parasanguinis	0	0	1	8	Absent
xRE	1	0.25	0.75	0.333333	1	Strep. parasanguinis	1	2	1	8	Shared
group_1340	0	0	0	NA	NA	Strep. parasanguinis	0	0	1	8	Absent
ydeA	1	0.875	0.125	1	1	Strep. parasanguinis	1	7	1	8	Shared
group_630	0	0	0	NA	NA	Strep. parasanguinis	0	0	1	8	Absent
group_629	0	0	0	NA	NA	Strep. parasanguinis	0	0	1	8	Absent
group_398	0	0	0	NA	NA	Strep. parasanguinis	0	0	1	8	Absent
group_21766	0	0	0	NA	NA	Strep. parasanguinis	0	0	1	8	Absent
group_20127	0	0	0	NA	NA	Strep. parasanguinis	0	0	1	8	Absent
group_16025	1	0.75	0.25	1	1	Strep. parasanguinis	1	6	1	8	Shared
group_2658	1	1	0	NA	NA	Strep. parasanguinis	1	8	1	8	Shared
argA~~~ywnH	0	0	0	NA	NA	Strep. parasanguinis	0	0	1	8	Absent
group_2587	0	0	0	NA	NA	Strep. parasanguinis	0	0	1	8	Absent
group_2576	0	0	0	NA	NA	Strep. parasanguinis	0	0	1	8	Absent
group_2269	0	0	0	NA	NA	Strep. parasanguinis	0	0	1	8	Absent
ppiB	0	0	0	NA	NA	Strep. parasanguinis	0	0	1	8	Absent
group_1326	1	1	0	NA	NA	Strep. parasanguinis	1	8	1	8	Shared
menH	0	0	0	NA	NA	Strep. parasanguinis	0	0	1	8	Absent
group_15983	1	0.75	0.25	1	1	Strep. parasanguinis	1	6	1	8	Shared
mazG	1	0.75	0.25	1	1	Strep. parasanguinis	1	6	1	8	Shared
glpE	0	0	0	NA	NA	Strep. parasanguinis	0	0	1	8	Absent
yhbS	0	0	0	NA	NA	Strep. parasanguinis	0	0	1	8	Absent
group_21716	0	0	0	NA	NA	Strep. parasanguinis	0	0	1	8	Absent
group_20378	1	0	1	0.111111	1	Strep. parasanguinis	1	0	1	8	Tumour-specific
group_3117	0	0.25	0.25	1	1	Strep. parasanguinis	0	2	1	8	Oral-specific
group_3054	1	1	0	NA	NA	Strep. parasanguinis	1	8	1	8	Shared
zupT	1	0.875	0.125	1	1	Strep. parasanguinis	1	7	1	8	Shared
trmH~~~spoU	0	0	0	NA	NA	Strep. parasanguinis	0	0	1	8	Absent
acyP	0	0	0	NA	NA	Strep. parasanguinis	0	0	1	8	Absent
group_2083	0	0	0	NA	NA	Strep. parasanguinis	0	0	1	8	Absent
norM~~~dinF	0	0	0	NA	NA	Strep. parasanguinis	0	0	1	8	Absent
srtB	1	1	0	NA	NA	Strep. parasanguinis	1	8	1	8	Shared
ppsA	0	0	0	NA	NA	Strep. parasanguinis	0	0	1	8	Absent
group_21781	0	0	0	NA	NA	Strep. parasanguinis	0	0	1	8	Absent
group_21750	0	0	0	NA	NA	Strep. parasanguinis	0	0	1	8	Absent
trkG~~~trkH	0	0	0	NA	NA	Strep. parasanguinis	0	0	1	8	Absent
group_21713	0	0	0	NA	NA	Strep. parasanguinis	0	0	1	8	Absent
group_21701	0	0	0	NA	NA	Strep. parasanguinis	0	0	1	8	Absent
group_21667	0	0	0	NA	NA	Strep. parasanguinis	0	0	1	8	Absent
group_21623	0	0	0	NA	NA	Strep. parasanguinis	0	0	1	8	Absent
group_21582	0	0	0	NA	NA	Strep. parasanguinis	0	0	1	8	Absent
group_21493	0	0	0	NA	NA	Strep. parasanguinis	0	0	1	8	Absent
group_21480	0	0	0	NA	NA	Strep. parasanguinis	0	0	1	8	Absent
group_21470	0	0	0	NA	NA	Strep. parasanguinis	0	0	1	8	Absent
group_21469	0	0	0	NA	NA	Strep. parasanguinis	0	0	1	8	Absent
group_21467	0	0	0	NA	NA	Strep. parasanguinis	0	0	1	8	Absent
ampH~~~ampC	0	0	0	NA	NA	Strep. parasanguinis	0	0	1	8	Absent
group_21451	0	0	0	NA	NA	Strep. parasanguinis	0	0	1	8	Absent
pcnB~~~cca	0	0	0	NA	NA	Strep. parasanguinis	0	0	1	8	Absent
group_21421	0	0	0	NA	NA	Strep. parasanguinis	0	0	1	8	Absent
group_21382	0	0	0	NA	NA	Strep. parasanguinis	0	0	1	8	Absent
group_21379	0	0	0	NA	NA	Strep. parasanguinis	0	0	1	8	Absent
group_21336	0	0	0	NA	NA	Strep. parasanguinis	0	0	1	8	Absent
group_21330	0	0	0	NA	NA	Strep. parasanguinis	0	0	1	8	Absent
group_21325	0	0	0	NA	NA	Strep. parasanguinis	0	0	1	8	Absent
group_21324	0	0	0	NA	NA	Strep. parasanguinis	0	0	1	8	Absent
group_21320	0	0	0	NA	NA	Strep. parasanguinis	0	0	1	8	Absent
arsC~~~adaB	0	0	0	NA	NA	Strep. parasanguinis	0	0	1	8	Absent
group_21305	0	0	0	NA	NA	Strep. parasanguinis	0	0	1	8	Absent
group_21284	0	0	0	NA	NA	Strep. parasanguinis	0	0	1	8	Absent
salY~~~yknZ	0	0	0	NA	NA	Strep. parasanguinis	0	0	1	8	Absent
ecsA~~~ccmA	0	0	0	NA	NA	Strep. parasanguinis	0	0	1	8	Absent
fabZ~~~fatA	0	0	0	NA	NA	Strep. parasanguinis	0	0	1	8	Absent
group_21267	0	0	0	NA	NA	Strep. parasanguinis	0	0	1	8	Absent
group_21266	0	0	0	NA	NA	Strep. parasanguinis	0	0	1	8	Absent
group_21258	0	0	0	NA	NA	Strep. parasanguinis	0	0	1	8	Absent
group_21257	0	0	0	NA	NA	Strep. parasanguinis	0	0	1	8	Absent
group_21251	0	0	0	NA	NA	Strep. parasanguinis	0	0	1	8	Absent
group_21232	0	0	0	NA	NA	Strep. parasanguinis	0	0	1	8	Absent
celB~~~comEC	0	0	0	NA	NA	Strep. parasanguinis	0	0	1	8	Absent
group_21199	0	0	0	NA	NA	Strep. parasanguinis	0	0	1	8	Absent
group_21197	0	0	0	NA	NA	Strep. parasanguinis	0	0	1	8	Absent
group_21196	0	0	0	NA	NA	Strep. parasanguinis	0	0	1	8	Absent
group_21195	0	0	0	NA	NA	Strep. parasanguinis	0	0	1	8	Absent
group_21194	0	0	0	NA	NA	Strep. parasanguinis	0	0	1	8	Absent
group_21181	0	0	0	NA	NA	Strep. parasanguinis	0	0	1	8	Absent
group_21164	0	0	0	NA	NA	Strep. parasanguinis	0	0	1	8	Absent
htrA~~~degQ	0	0	0	NA	NA	Strep. parasanguinis	0	0	1	8	Absent
group_21151	0	0	0	NA	NA	Strep. parasanguinis	0	0	1	8	Absent
group_21150	0	0	0	NA	NA	Strep. parasanguinis	0	0	1	8	Absent
cdaR~~~ybbR	0	0	0	NA	NA	Strep. parasanguinis	0	0	1	8	Absent
group_21142	0	0	0	NA	NA	Strep. parasanguinis	0	0	1	8	Absent
group_21138	0	0	0	NA	NA	Strep. parasanguinis	0	0	1	8	Absent
group_21134	0	0	0	NA	NA	Strep. parasanguinis	0	0	1	8	Absent
group_21110	0	0	0	NA	NA	Strep. parasanguinis	0	0	1	8	Absent
group_21106	0	0	0	NA	NA	Strep. parasanguinis	0	0	1	8	Absent
group_21093	0	0	0	NA	NA	Strep. parasanguinis	0	0	1	8	Absent
group_21092	0	0	0	NA	NA	Strep. parasanguinis	0	0	1	8	Absent
group_21077	0	0	0	NA	NA	Strep. parasanguinis	0	0	1	8	Absent
celA~~~comEA	0	0	0	NA	NA	Strep. parasanguinis	0	0	1	8	Absent
group_21052	0	0	0	NA	NA	Strep. parasanguinis	0	0	1	8	Absent
group_21049	0	0	0	NA	NA	Strep. parasanguinis	0	0	1	8	Absent
group_21048	0	0	0	NA	NA	Strep. parasanguinis	0	0	1	8	Absent
group_21046	0	0	0	NA	NA	Strep. parasanguinis	0	0	1	8	Absent
group_21043	0	0	0	NA	NA	Strep. parasanguinis	0	0	1	8	Absent
group_21026	0	0	0	NA	NA	Strep. parasanguinis	0	0	1	8	Absent
group_21014	0	0	0	NA	NA	Strep. parasanguinis	0	0	1	8	Absent
group_21000	0	0	0	NA	NA	Strep. parasanguinis	0	0	1	8	Absent
group_20992	0	0	0	NA	NA	Strep. parasanguinis	0	0	1	8	Absent
group_20987	0	0	0	NA	NA	Strep. parasanguinis	0	0	1	8	Absent
ybiV	0	0	0	NA	NA	Strep. parasanguinis	0	0	1	8	Absent
group_20984	0	0	0	NA	NA	Strep. parasanguinis	0	0	1	8	Absent
group_20979	0	0	0	NA	NA	Strep. parasanguinis	0	0	1	8	Absent
group_20968	0	0	0	NA	NA	Strep. parasanguinis	0	0	1	8	Absent
group_20967	0	0	0	NA	NA	Strep. parasanguinis	0	0	1	8	Absent
group_20964	0	0	0	NA	NA	Strep. parasanguinis	0	0	1	8	Absent
group_20959	0	0	0	NA	NA	Strep. parasanguinis	0	0	1	8	Absent
group_20941	0	0	0	NA	NA	Strep. parasanguinis	0	0	1	8	Absent
yjjP	0	0	0	NA	NA	Strep. parasanguinis	0	0	1	8	Absent
group_20874	0	0	0	NA	NA	Strep. parasanguinis	0	0	1	8	Absent
group_20869	0	0	0	NA	NA	Strep. parasanguinis	0	0	1	8	Absent
group_20866	0	0	0	NA	NA	Strep. parasanguinis	0	0	1	8	Absent
group_20837	0	0	0	NA	NA	Strep. parasanguinis	0	0	1	8	Absent
gor	0	0	0	NA	NA	Strep. parasanguinis	0	0	1	8	Absent
group_20817	0	0	0	NA	NA	Strep. parasanguinis	0	0	1	8	Absent
group_20810	0	0	0	NA	NA	Strep. parasanguinis	0	0	1	8	Absent
group_20782	0	0	0	NA	NA	Strep. parasanguinis	0	0	1	8	Absent
group_20765	0	0	0	NA	NA	Strep. parasanguinis	0	0	1	8	Absent
group_20755	0	0	0	NA	NA	Strep. parasanguinis	0	0	1	8	Absent
group_20749	0	0	0	NA	NA	Strep. parasanguinis	0	0	1	8	Absent
group_20726	0	0	0	NA	NA	Strep. parasanguinis	0	0	1	8	Absent
group_20725	0	0	0	NA	NA	Strep. parasanguinis	0	0	1	8	Absent
group_20706	0	0	0	NA	NA	Strep. parasanguinis	0	0	1	8	Absent
tPR	0	0	0	NA	NA	Strep. parasanguinis	0	0	1	8	Absent
group_20688	0	0	0	NA	NA	Strep. parasanguinis	0	0	1	8	Absent
folK~~~folB	0	0	0	NA	NA	Strep. parasanguinis	0	0	1	8	Absent
albF~~~pqqL	0	0	0	NA	NA	Strep. parasanguinis	0	0	1	8	Absent
group_20657	0	0	0	NA	NA	Strep. parasanguinis	0	0	1	8	Absent
yidC2~~~yidC	0	0	0	NA	NA	Strep. parasanguinis	0	0	1	8	Absent
group_20640	0	0	0	NA	NA	Strep. parasanguinis	0	0	1	8	Absent
group_20622	0	0	0	NA	NA	Strep. parasanguinis	0	0	1	8	Absent
group_20621	0	0	0	NA	NA	Strep. parasanguinis	0	0	1	8	Absent
thrE~~~yjjB	0	0	0	NA	NA	Strep. parasanguinis	0	0	1	8	Absent
group_20610	0	0	0	NA	NA	Strep. parasanguinis	0	0	1	8	Absent
group_20598	0	0	0	NA	NA	Strep. parasanguinis	0	0	1	8	Absent
group_20567	0	0	0	NA	NA	Strep. parasanguinis	0	0	1	8	Absent
group_20560	0	0	0	NA	NA	Strep. parasanguinis	0	0	1	8	Absent
group_20527	0	0	0	NA	NA	Strep. parasanguinis	0	0	1	8	Absent
group_20520	0	0	0	NA	NA	Strep. parasanguinis	0	0	1	8	Absent
group_20449	0	0	0	NA	NA	Strep. parasanguinis	0	0	1	8	Absent
group_20443	0	0	0	NA	NA	Strep. parasanguinis	0	0	1	8	Absent
group_20438	0	0	0	NA	NA	Strep. parasanguinis	0	0	1	8	Absent
group_20428	0	0	0	NA	NA	Strep. parasanguinis	0	0	1	8	Absent
ncl1~~~rsmF	0	0	0	NA	NA	Strep. parasanguinis	0	0	1	8	Absent
group_20390	0	0	0	NA	NA	Strep. parasanguinis	0	0	1	8	Absent
group_20389	0	0	0	NA	NA	Strep. parasanguinis	0	0	1	8	Absent
lolE~~~lolC	0	0	0	NA	NA	Strep. parasanguinis	0	0	1	8	Absent
group_20333	0	0	0	NA	NA	Strep. parasanguinis	0	0	1	8	Absent
natB	0	0	0	NA	NA	Strep. parasanguinis	0	0	1	8	Absent
group_20313	0	0	0	NA	NA	Strep. parasanguinis	0	0	1	8	Absent
group_20302	0	0	0	NA	NA	Strep. parasanguinis	0	0	1	8	Absent
group_20298	0	0	0	NA	NA	Strep. parasanguinis	0	0	1	8	Absent
exp8	0	0	0	NA	NA	Strep. parasanguinis	0	0	1	8	Absent
group_20297	0	0	0	NA	NA	Strep. parasanguinis	0	0	1	8	Absent
group_20278	0	0	0	NA	NA	Strep. parasanguinis	0	0	1	8	Absent
group_20256	0	0	0	NA	NA	Strep. parasanguinis	0	0	1	8	Absent
group_20248	0	0	0	NA	NA	Strep. parasanguinis	0	0	1	8	Absent
albE~~~pqqL	0	0	0	NA	NA	Strep. parasanguinis	0	0	1	8	Absent
jag~~~khpB	0	0	0	NA	NA	Strep. parasanguinis	0	0	1	8	Absent
group_20185	0	0	0	NA	NA	Strep. parasanguinis	0	0	1	8	Absent
group_20145	0	0	0	NA	NA	Strep. parasanguinis	0	0	1	8	Absent
group_20140	0	0	0	NA	NA	Strep. parasanguinis	0	0	1	8	Absent
group_20135	0	0	0	NA	NA	Strep. parasanguinis	0	0	1	8	Absent
group_20125	0	0	0	NA	NA	Strep. parasanguinis	0	0	1	8	Absent
group_20096	0	0	0	NA	NA	Strep. parasanguinis	0	0	1	8	Absent
ycjS~~~mviM	0	0	0	NA	NA	Strep. parasanguinis	0	0	1	8	Absent
group_20035	0	0	0	NA	NA	Strep. parasanguinis	0	0	1	8	Absent
group_20000	0	0	0	NA	NA	Strep. parasanguinis	0	0	1	8	Absent
group_19958	0	0	0	NA	NA	Strep. parasanguinis	0	0	1	8	Absent
group_19874	0	0	0	NA	NA	Strep. parasanguinis	0	0	1	8	Absent
group_19845	0	0	0	NA	NA	Strep. parasanguinis	0	0	1	8	Absent
group_19814	0	0	0	NA	NA	Strep. parasanguinis	0	0	1	8	Absent
group_19785	0	0	0	NA	NA	Strep. parasanguinis	0	0	1	8	Absent
group_19748	0	0	0	NA	NA	Strep. parasanguinis	0	0	1	8	Absent
group_19747	0	0	0	NA	NA	Strep. parasanguinis	0	0	1	8	Absent
vncR~~~regX3	0	0	0	NA	NA	Strep. parasanguinis	0	0	1	8	Absent
group_19720	0	0	0	NA	NA	Strep. parasanguinis	0	0	1	8	Absent
ccrZ	0	0	0	NA	NA	Strep. parasanguinis	0	0	1	8	Absent
group_19681	0	0	0	NA	NA	Strep. parasanguinis	0	0	1	8	Absent
exoY~~~wcaJ	0	0	0	NA	NA	Strep. parasanguinis	0	0	1	8	Absent
group_19657	0	0	0	NA	NA	Strep. parasanguinis	0	0	1	8	Absent
dnaB~~~dnaD	0	0	0	NA	NA	Strep. parasanguinis	0	0	1	8	Absent
group_19609	0	0	0	NA	NA	Strep. parasanguinis	0	0	1	8	Absent
group_19579	0	0	0	NA	NA	Strep. parasanguinis	0	0	1	8	Absent
group_19578	0	0	0	NA	NA	Strep. parasanguinis	0	0	1	8	Absent
group_19560	0	0	0	NA	NA	Strep. parasanguinis	0	0	1	8	Absent
group_19541	0	0	0	NA	NA	Strep. parasanguinis	0	0	1	8	Absent
group_19512	0	0	0	NA	NA	Strep. parasanguinis	0	0	1	8	Absent
group_19492	0	0	0	NA	NA	Strep. parasanguinis	0	0	1	8	Absent
group_19466	0	0	0	NA	NA	Strep. parasanguinis	0	0	1	8	Absent
group_19443	0	0	0	NA	NA	Strep. parasanguinis	0	0	1	8	Absent
group_19366	0	0	0	NA	NA	Strep. parasanguinis	0	0	1	8	Absent
group_19363	0	0	0	NA	NA	Strep. parasanguinis	0	0	1	8	Absent
group_19354	0	0	0	NA	NA	Strep. parasanguinis	0	0	1	8	Absent
group_19350	0	0	0	NA	NA	Strep. parasanguinis	0	0	1	8	Absent
group_19087	0	0	0	NA	NA	Strep. parasanguinis	0	0	1	8	Absent
group_18992	0	0	0	NA	NA	Strep. parasanguinis	0	0	1	8	Absent
group_18895	0	0	0	NA	NA	Strep. parasanguinis	0	0	1	8	Absent
group_18861	0	0	0	NA	NA	Strep. parasanguinis	0	0	1	8	Absent
group_18844	0	0	0	NA	NA	Strep. parasanguinis	0	0	1	8	Absent
group_18843	0	0	0	NA	NA	Strep. parasanguinis	0	0	1	8	Absent
group_18726	0	0	0	NA	NA	Strep. parasanguinis	0	0	1	8	Absent
vncS~~~walK	0	0	0	NA	NA	Strep. parasanguinis	0	0	1	8	Absent
group_18648	0	0	0	NA	NA	Strep. parasanguinis	0	0	1	8	Absent
group_18646	0	0	0	NA	NA	Strep. parasanguinis	0	0	1	8	Absent
group_18645	0	0	0	NA	NA	Strep. parasanguinis	0	0	1	8	Absent
group_18628	0	0	0	NA	NA	Strep. parasanguinis	0	0	1	8	Absent
group_18601	0	0	0	NA	NA	Strep. parasanguinis	0	0	1	8	Absent
dhfR	0	0	0	NA	NA	Strep. parasanguinis	0	0	1	8	Absent
wecE	0	0	0	NA	NA	Strep. parasanguinis	0	0	1	8	Absent
group_18590	0	0	0	NA	NA	Strep. parasanguinis	0	0	1	8	Absent
group_18540	0	0	0	NA	NA	Strep. parasanguinis	0	0	1	8	Absent
group_18539	0	0	0	NA	NA	Strep. parasanguinis	0	0	1	8	Absent
group_18530	0	0	0	NA	NA	Strep. parasanguinis	0	0	1	8	Absent
group_18465	0	0	0	NA	NA	Strep. parasanguinis	0	0	1	8	Absent
rlmN~~~vanZ	0	0	0	NA	NA	Strep. parasanguinis	0	0	1	8	Absent
group_18344	0	0	0	NA	NA	Strep. parasanguinis	0	0	1	8	Absent
group_18306	0	0	0	NA	NA	Strep. parasanguinis	0	0	1	8	Absent
group_18287	0	0	0	NA	NA	Strep. parasanguinis	0	0	1	8	Absent
group_18274	0	0	0	NA	NA	Strep. parasanguinis	0	0	1	8	Absent
group_18229	0	0	0	NA	NA	Strep. parasanguinis	0	0	1	8	Absent
group_18032	0	0	0	NA	NA	Strep. parasanguinis	0	0	1	8	Absent
group_17624	0	0	0	NA	NA	Strep. parasanguinis	0	0	1	8	Absent
group_17456	0	0	0	NA	NA	Strep. parasanguinis	0	0	1	8	Absent
group_17300	0	0	0	NA	NA	Strep. parasanguinis	0	0	1	8	Absent
group_17218	0	0	0	NA	NA	Strep. parasanguinis	0	0	1	8	Absent
group_17195	0	0	0	NA	NA	Strep. parasanguinis	0	0	1	8	Absent
group_17130	0	0	0	NA	NA	Strep. parasanguinis	0	0	1	8	Absent
group_17110	0	0	0	NA	NA	Strep. parasanguinis	0	0	1	8	Absent
group_16962	0	0	0	NA	NA	Strep. parasanguinis	0	0	1	8	Absent
group_16931	0	0	0	NA	NA	Strep. parasanguinis	0	0	1	8	Absent
group_16929	0	0	0	NA	NA	Strep. parasanguinis	0	0	1	8	Absent
group_16840	0	0	0	NA	NA	Strep. parasanguinis	0	0	1	8	Absent
group_16824	0	0	0	NA	NA	Strep. parasanguinis	0	0	1	8	Absent
group_16754	0	0	0	NA	NA	Strep. parasanguinis	0	0	1	8	Absent
group_16740	0	0	0	NA	NA	Strep. parasanguinis	0	0	1	8	Absent
group_16640	0	0	0	NA	NA	Strep. parasanguinis	0	0	1	8	Absent
group_16466	0	0	0	NA	NA	Strep. parasanguinis	0	0	1	8	Absent
group_16339	0	0	0	NA	NA	Strep. parasanguinis	0	0	1	8	Absent
group_3729	0	0	0	NA	NA	Strep. parasanguinis	0	0	1	8	Absent
group_3004	1	1	0	NA	NA	Strep. parasanguinis	1	8	1	8	Shared
group_2782	0	0	0	NA	NA	Strep. parasanguinis	0	0	1	8	Absent
comGA~~~comGB	0	0	0	NA	NA	Strep. parasanguinis	0	0	1	8	Absent
licC	0	0	0	NA	NA	Strep. parasanguinis	0	0	1	8	Absent
rhaT~~~licB	0	0	0	NA	NA	Strep. parasanguinis	0	0	1	8	Absent
cotS~~~licA	0	0	0	NA	NA	Strep. parasanguinis	0	0	1	8	Absent
tarJ	0	0	0	NA	NA	Strep. parasanguinis	0	0	1	8	Absent
tarI	0	0	0	NA	NA	Strep. parasanguinis	0	0	1	8	Absent
group_2621	0	0	0	NA	NA	Strep. parasanguinis	0	0	1	8	Absent
group_2502	0	0	0	NA	NA	Strep. parasanguinis	0	0	1	8	Absent
glpG	0	0	0	NA	NA	Strep. parasanguinis	0	0	1	8	Absent
lytT	0	0	0	NA	NA	Strep. parasanguinis	0	0	1	8	Absent
group_2480	0	0	0	NA	NA	Strep. parasanguinis	0	0	1	8	Absent
fAU1	0	0	0	NA	NA	Strep. parasanguinis	0	0	1	8	Absent
thiD	0	0	0	NA	NA	Strep. parasanguinis	0	0	1	8	Absent
group_2426	0	0	0	NA	NA	Strep. parasanguinis	0	0	1	8	Absent
group_2425	0	0	0	NA	NA	Strep. parasanguinis	0	0	1	8	Absent
group_2416	0	0	0	NA	NA	Strep. parasanguinis	0	0	1	8	Absent
pgpB	0	0	0	NA	NA	Strep. parasanguinis	0	0	1	8	Absent
eamA~~~rhaT	0	0	0	NA	NA	Strep. parasanguinis	0	0	1	8	Absent
comGF~~~comGG	0	0	0	NA	NA	Strep. parasanguinis	0	0	1	8	Absent
group_2309	0	0	0	NA	NA	Strep. parasanguinis	0	0	1	8	Absent
dadA	0	0	0	NA	NA	Strep. parasanguinis	0	0	1	8	Absent
fieF~~~mntE	0	0	0	NA	NA	Strep. parasanguinis	0	0	1	8	Absent
nIF3	0	0	0	NA	NA	Strep. parasanguinis	0	0	1	8	Absent
comGD	0	0	0	NA	NA	Strep. parasanguinis	0	0	1	8	Absent
hinT	0	0	0	NA	NA	Strep. parasanguinis	0	0	1	8	Absent
group_2145	0	0	0	NA	NA	Strep. parasanguinis	0	0	1	8	Absent
comGC	0	0	0	NA	NA	Strep. parasanguinis	0	0	1	8	Absent
dnaG	0	0	0	NA	NA	Strep. parasanguinis	0	0	1	8	Absent
trmK	0	0	0	NA	NA	Strep. parasanguinis	0	0	1	8	Absent
group_2043	0	0	0	NA	NA	Strep. parasanguinis	0	0	1	8	Absent
group_2036	0	0	0	NA	NA	Strep. parasanguinis	0	0	1	8	Absent
rfaL	0	0	0	NA	NA	Strep. parasanguinis	0	0	1	8	Absent
aroK	0	0	0	NA	NA	Strep. parasanguinis	0	0	1	8	Absent
psr	0	0	0	NA	NA	Strep. parasanguinis	0	0	1	8	Absent
group_1975	0	0	0	NA	NA	Strep. parasanguinis	0	0	1	8	Absent
group_1962	0	0	0	NA	NA	Strep. parasanguinis	0	0	1	8	Absent
phnK	0	0	0	NA	NA	Strep. parasanguinis	0	0	1	8	Absent
group_1879	0	0	0	NA	NA	Strep. parasanguinis	0	0	1	8	Absent
group_1878	0	0	0	NA	NA	Strep. parasanguinis	0	0	1	8	Absent
rpoD	0	0	0	NA	NA	Strep. parasanguinis	0	0	1	8	Absent
trpX	0	0	0	NA	NA	Strep. parasanguinis	0	0	1	8	Absent
dnaQ~~~dinG~~~polC	0	0	0	NA	NA	Strep. parasanguinis	0	0	1	8	Absent
group_1824	0	0	0	NA	NA	Strep. parasanguinis	0	0	1	8	Absent
ftsA	0	0	0	NA	NA	Strep. parasanguinis	0	0	1	8	Absent
group_1709	0	0	0	NA	NA	Strep. parasanguinis	0	0	1	8	Absent
group_1656	0	0	0	NA	NA	Strep. parasanguinis	0	0	1	8	Absent
group_1655	0	0	0	NA	NA	Strep. parasanguinis	0	0	1	8	Absent
ehuA	0	0	0	NA	NA	Strep. parasanguinis	0	0	1	8	Absent
group_1641	0	0	0	NA	NA	Strep. parasanguinis	0	0	1	8	Absent
group_1571	0	0	0	NA	NA	Strep. parasanguinis	0	0	1	8	Absent
yitT	0	0	0	NA	NA	Strep. parasanguinis	0	0	1	8	Absent
ftsW	0	0	0	NA	NA	Strep. parasanguinis	0	0	1	8	Absent
cpoA	0	0	0	NA	NA	Strep. parasanguinis	0	0	1	8	Absent
group_1525	0	0	0	NA	NA	Strep. parasanguinis	0	0	1	8	Absent
pbp2X~~~ftsI	0	0	0	NA	NA	Strep. parasanguinis	0	0	1	8	Absent
thrB	0	0	0	NA	NA	Strep. parasanguinis	0	0	1	8	Absent
group_1479	0	0	0	NA	NA	Strep. parasanguinis	0	0	1	8	Absent
prsA	0	0	0	NA	NA	Strep. parasanguinis	0	0	1	8	Absent
thrA	0	0	0	NA	NA	Strep. parasanguinis	0	0	1	8	Absent
trmR	0	0	0	NA	NA	Strep. parasanguinis	0	0	1	8	Absent
pyrK	0	0	0	NA	NA	Strep. parasanguinis	0	0	1	8	Absent
pgdA	0	0	0	NA	NA	Strep. parasanguinis	0	0	1	8	Absent
group_1409	0	0	0	NA	NA	Strep. parasanguinis	0	0	1	8	Absent
group_1352	0	0	0	NA	NA	Strep. parasanguinis	0	0	1	8	Absent
group_1319	1	0.25	0.75	0.333333	1	Strep. parasanguinis	1	2	1	8	Shared
group_1259	0	0	0	NA	NA	Strep. parasanguinis	0	0	1	8	Absent
yggS	0	0	0	NA	NA	Strep. parasanguinis	0	0	1	8	Absent
group_1233	0	0.25	0.25	1	1	Strep. parasanguinis	0	2	1	8	Oral-specific
sarA	0	0	0	NA	NA	Strep. parasanguinis	0	0	1	8	Absent
tlpA~~~resA~~~bcp	0	0	0	NA	NA	Strep. parasanguinis	0	0	1	8	Absent
obgE	0	0	0	NA	NA	Strep. parasanguinis	0	0	1	8	Absent
group_1113	0	0	0	NA	NA	Strep. parasanguinis	0	0	1	8	Absent
sepF	0	0	0	NA	NA	Strep. parasanguinis	0	0	1	8	Absent
ddl	0	0	0	NA	NA	Strep. parasanguinis	0	0	1	8	Absent
murF	0	0	0	NA	NA	Strep. parasanguinis	0	0	1	8	Absent
group_1022	0	0	0	NA	NA	Strep. parasanguinis	0	0	1	8	Absent
group_959	0	0	0	NA	NA	Strep. parasanguinis	0	0	1	8	Absent
group_957	0	0	0	NA	NA	Strep. parasanguinis	0	0	1	8	Absent
cynX	0	0	0	NA	NA	Strep. parasanguinis	0	0	1	8	Absent
ywnH~~~rimL	0	0	0	NA	NA	Strep. parasanguinis	0	0	1	8	Absent
pbp1a	0	0	0	NA	NA	Strep. parasanguinis	0	0	1	8	Absent
recU	0	0	0	NA	NA	Strep. parasanguinis	0	0	1	8	Absent
ybdK	0	0	0	NA	NA	Strep. parasanguinis	0	0	1	8	Absent
group_791	0	0	0	NA	NA	Strep. parasanguinis	0	0	1	8	Absent
greA	0	0	0	NA	NA	Strep. parasanguinis	0	0	1	8	Absent
mltG	0	0	0	NA	NA	Strep. parasanguinis	0	0	1	8	Absent
pulA	0	0	0	NA	NA	Strep. parasanguinis	0	0	1	8	Absent
flaA1	0	0	0	NA	NA	Strep. parasanguinis	0	0	1	8	Absent
gpsB	0	0	0	NA	NA	Strep. parasanguinis	0	0	1	8	Absent
yoqJ	0	0	0	NA	NA	Strep. parasanguinis	0	0	1	8	Absent
gph	0	0	0	NA	NA	Strep. parasanguinis	0	0	1	8	Absent
hepA	0	0	0	NA	NA	Strep. parasanguinis	0	0	1	8	Absent
rimI~~~yhbS	0	0	0	NA	NA	Strep. parasanguinis	0	0	1	8	Absent
group_421	0	0	0	NA	NA	Strep. parasanguinis	0	0	1	8	Absent
group_317	0	0	0	NA	NA	Strep. parasanguinis	0	0	1	8	Absent
niaX	0	0	0	NA	NA	Strep. parasanguinis	0	0	1	8	Absent
group_205	0	0	0	NA	NA	Strep. parasanguinis	0	0	1	8	Absent
ywlG	0	0	0	NA	NA	Strep. parasanguinis	0	0	1	8	Absent
lysM~~~lytE	0	0	0	NA	NA	Strep. parasanguinis	0	0	1	8	Absent
pabB	0	0	0	NA	NA	Strep. parasanguinis	0	0	1	8	Absent
murC	0	0	0	NA	NA	Strep. parasanguinis	0	0	1	8	Absent
purE	1	1	0	NA	NA	Strep. parasanguinis	1	8	1	8	Shared
yqgV	0	0	0	NA	NA	Strep. parasanguinis	0	0	1	8	Absent
group_21745	0	0	0	NA	NA	Strep. parasanguinis	0	0	1	8	Absent
group_21529	1	1	0	NA	NA	Strep. parasanguinis	1	8	1	8	Shared
comD~~~yesM~~~dcuS	0	0	0	NA	NA	Strep. parasanguinis	0	0	1	8	Absent
group_20975	0	0	0	NA	NA	Strep. parasanguinis	0	0	1	8	Absent
group_20912	0	0	0	NA	NA	Strep. parasanguinis	0	0	1	8	Absent
btuD	0	0	0	NA	NA	Strep. parasanguinis	0	0	1	8	Absent
group_20897	0	0	0	NA	NA	Strep. parasanguinis	0	0	1	8	Absent
group_20691	0	0	0	NA	NA	Strep. parasanguinis	0	0	1	8	Absent
group_20595	0	0	0	NA	NA	Strep. parasanguinis	0	0	1	8	Absent
ysdA	0	0	0	NA	NA	Strep. parasanguinis	0	0	1	8	Absent
group_20289	0	0	0	NA	NA	Strep. parasanguinis	0	0	1	8	Absent
group_20134	0	0	0	NA	NA	Strep. parasanguinis	0	0	1	8	Absent
group_20113	0	0	0	NA	NA	Strep. parasanguinis	0	0	1	8	Absent
group_19784	0	0	0	NA	NA	Strep. parasanguinis	0	0	1	8	Absent
group_19660	0	0	0	NA	NA	Strep. parasanguinis	0	0	1	8	Absent
group_19659	0	0	0	NA	NA	Strep. parasanguinis	0	0	1	8	Absent
group_19639	0	0	0	NA	NA	Strep. parasanguinis	0	0	1	8	Absent
group_19343	0	0	0	NA	NA	Strep. parasanguinis	0	0	1	8	Absent
group_19342	0	0	0	NA	NA	Strep. parasanguinis	0	0	1	8	Absent
group_19341	0	0	0	NA	NA	Strep. parasanguinis	0	0	1	8	Absent
group_19309	0	0	0	NA	NA	Strep. parasanguinis	0	0	1	8	Absent
group_19017	0	0	0	NA	NA	Strep. parasanguinis	0	0	1	8	Absent
group_18701	0	0	0	NA	NA	Strep. parasanguinis	0	0	1	8	Absent
group_18594	0	0	0	NA	NA	Strep. parasanguinis	0	0	1	8	Absent
group_18114	0	0	0	NA	NA	Strep. parasanguinis	0	0	1	8	Absent
group_18111	0	0	0	NA	NA	Strep. parasanguinis	0	0	1	8	Absent
group_17366	0	0	0	NA	NA	Strep. parasanguinis	0	0	1	8	Absent
impB	1	0.75	0.25	1	1	Strep. parasanguinis	1	6	1	8	Shared
cynT	0	0	0	NA	NA	Strep. parasanguinis	0	0	1	8	Absent
group_2881	0	0	0	NA	NA	Strep. parasanguinis	0	0	1	8	Absent
tatA	1	1	0	NA	NA	Strep. parasanguinis	1	8	1	8	Shared
sdpR~~~arsR	1	0.875	0.125	1	1	Strep. parasanguinis	1	7	1	8	Shared
ydhC~~~pmrA	0	0	0	NA	NA	Strep. parasanguinis	0	0	1	8	Absent
rimL	0	0	0	NA	NA	Strep. parasanguinis	0	0	1	8	Absent
pulO~~~pppA	0	0	0	NA	NA	Strep. parasanguinis	0	0	1	8	Absent
group_1408	0	0	0	NA	NA	Strep. parasanguinis	0	0	1	8	Absent
alr	0	0	0	NA	NA	Strep. parasanguinis	0	0	1	8	Absent
group_21386	0	0	0	NA	NA	Strep. parasanguinis	0	0	1	8	Absent
group_21236	0	0	0	NA	NA	Strep. parasanguinis	0	0	1	8	Absent
group_21180	0	0	0	NA	NA	Strep. parasanguinis	0	0	1	8	Absent
group_21113	0	0	0	NA	NA	Strep. parasanguinis	0	0	1	8	Absent
cbpF~~~cbpJ	0	0	0	NA	NA	Strep. parasanguinis	0	0	1	8	Absent
group_20999	0	0	0	NA	NA	Strep. parasanguinis	0	0	1	8	Absent
group_20924	0	0	0	NA	NA	Strep. parasanguinis	0	0	1	8	Absent
group_20377	1	0	1	0.111111	1	Strep. parasanguinis	1	0	1	8	Tumour-specific
crcB~~~fluC	1	0	1	0.111111	1	Strep. parasanguinis	1	0	1	8	Tumour-specific
group_19734	0	0	0	NA	NA	Strep. parasanguinis	0	0	1	8	Absent
group_7052	1	1	0	NA	NA	Strep. parasanguinis	1	8	1	8	Shared
group_2848	0	0.375	0.375	1	1	Strep. parasanguinis	0	3	1	8	Oral-specific
group_2669	1	1	0	NA	NA	Strep. parasanguinis	1	8	1	8	Shared
group_2664	0	0	0	NA	NA	Strep. parasanguinis	0	0	1	8	Absent
efeU	1	1	0	NA	NA	Strep. parasanguinis	1	8	1	8	Shared
whiA	1	1	0	NA	NA	Strep. parasanguinis	1	8	1	8	Shared
group_2599	1	1	0	NA	NA	Strep. parasanguinis	1	8	1	8	Shared
group_2577	1	1	0	NA	NA	Strep. parasanguinis	1	8	1	8	Shared
group_2570	1	1	0	NA	NA	Strep. parasanguinis	1	8	1	8	Shared
yesN	0	0	0	NA	NA	Strep. parasanguinis	0	0	1	8	Absent
group_2548	1	1	0	NA	NA	Strep. parasanguinis	1	8	1	8	Shared
group_2255	1	0.25	0.75	0.333333	1	Strep. parasanguinis	1	2	1	8	Shared
pncA	1	1	0	NA	NA	Strep. parasanguinis	1	8	1	8	Shared
comA~~~pncF	0	0	0	NA	NA	Strep. parasanguinis	0	0	1	8	Absent
group_21200	0	0	0	NA	NA	Strep. parasanguinis	0	0	1	8	Absent
group_21004	0	0	0	NA	NA	Strep. parasanguinis	0	0	1	8	Absent
group_19475	0	0	0	NA	NA	Strep. parasanguinis	0	0	1	8	Absent
group_2871	0	0.375	0.375	1	1	Strep. parasanguinis	0	3	1	8	Oral-specific
ccpN	0	0.375	0.375	1	1	Strep. parasanguinis	0	3	1	8	Oral-specific
ssuD	0	0	0	NA	NA	Strep. parasanguinis	0	0	1	8	Absent
efeB	1	1	0	NA	NA	Strep. parasanguinis	1	8	1	8	Shared
ypdA~~~yesM	0	0	0	NA	NA	Strep. parasanguinis	0	0	1	8	Absent
yesL	0	0	0	NA	NA	Strep. parasanguinis	0	0	1	8	Absent
group_1868	0	0	0	NA	NA	Strep. parasanguinis	0	0	1	8	Absent
amsE	0	0	0	NA	NA	Strep. parasanguinis	0	0	1	8	Absent
group_477	0	0	0	NA	NA	Strep. parasanguinis	0	0	1	8	Absent
group_21776	0	0	0	NA	NA	Strep. parasanguinis	0	0	1	8	Absent
group_20132	0	0	0	NA	NA	Strep. parasanguinis	0	0	1	8	Absent
cadD	0	0.75	0.75	0.333333	1	Strep. parasanguinis	0	6	1	8	Oral-specific
group_3038	0	0.125	0.125	1	1	Strep. parasanguinis	0	1	1	8	Oral-specific
glpO	0	0.125	0.125	1	1	Strep. parasanguinis	0	1	1	8	Oral-specific
nudI	0	0.375	0.375	1	1	Strep. parasanguinis	0	3	1	8	Oral-specific
group_2583	0	0	0	NA	NA	Strep. parasanguinis	0	0	1	8	Absent
holB	0	0	0	NA	NA	Strep. parasanguinis	0	0	1	8	Absent
group_2350	0	0	0	NA	NA	Strep. parasanguinis	0	0	1	8	Absent
mdlB~~~yheH	0	0	0	NA	NA	Strep. parasanguinis	0	0	1	8	Absent
group_1407	0	0	0	NA	NA	Strep. parasanguinis	0	0	1	8	Absent
ecfA1	0	0	0	NA	NA	Strep. parasanguinis	0	0	1	8	Absent
cpsC	0	0	0	NA	NA	Strep. parasanguinis	0	0	1	8	Absent
isaA~~~lysM	1	1	0	NA	NA	Strep. parasanguinis	1	8	1	8	Shared
group_20566	0	0.125	0.125	1	1	Strep. parasanguinis	0	1	1	8	Oral-specific
group_19558	0	0.25	0.25	1	1	Strep. parasanguinis	0	2	1	8	Oral-specific
group_19175	0	0	0	NA	NA	Strep. parasanguinis	0	0	1	8	Absent
group_2899	0	0	0	NA	NA	Strep. parasanguinis	0	0	1	8	Absent
fbp	0	0.375	0.375	1	1	Strep. parasanguinis	0	3	1	8	Oral-specific
group_2744	0	0	0	NA	NA	Strep. parasanguinis	0	0	1	8	Absent
group_2670	1	1	0	NA	NA	Strep. parasanguinis	1	8	1	8	Shared
group_2663	1	1	0	NA	NA	Strep. parasanguinis	1	8	1	8	Shared
group_2660	1	1	0	NA	NA	Strep. parasanguinis	1	8	1	8	Shared
tatC	1	1	0	NA	NA	Strep. parasanguinis	1	8	1	8	Shared
group_2606	1	1	0	NA	NA	Strep. parasanguinis	1	8	1	8	Shared
group_2591	1	1	0	NA	NA	Strep. parasanguinis	1	8	1	8	Shared
group_2590	1	1	0	NA	NA	Strep. parasanguinis	1	8	1	8	Shared
group_2384	0	0	0	NA	NA	Strep. parasanguinis	0	0	1	8	Absent
group_1414	1	1	0	NA	NA	Strep. parasanguinis	1	8	1	8	Shared
stbD	1	1	0	NA	NA	Strep. parasanguinis	1	8	1	8	Shared
slmA~~~tetR	1	1	0	NA	NA	Strep. parasanguinis	1	8	1	8	Shared
ybgA	0	0	0	NA	NA	Strep. parasanguinis	0	0	1	8	Absent
glgP	0	0	0	NA	NA	Strep. parasanguinis	0	0	1	8	Absent
comF~~~comFC	0	0	0	NA	NA	Strep. parasanguinis	0	0	1	8	Absent
group_20880	0	0	0	NA	NA	Strep. parasanguinis	0	0	1	8	Absent
group_20744	0	0	0	NA	NA	Strep. parasanguinis	0	0	1	8	Absent
group_18238	0	0	0	NA	NA	Strep. parasanguinis	0	0	1	8	Absent
group_17139	0	0	0	NA	NA	Strep. parasanguinis	0	0	1	8	Absent
group_16215	1	1	0	NA	NA	Strep. parasanguinis	1	8	1	8	Shared
group_16186	1	1	0	NA	NA	Strep. parasanguinis	1	8	1	8	Shared
group_16142	1	1	0	NA	NA	Strep. parasanguinis	1	8	1	8	Shared
group_15793	1	1	0	NA	NA	Strep. parasanguinis	1	8	1	8	Shared
group_15676	0	0	0	NA	NA	Strep. parasanguinis	0	0	1	8	Absent
yjbJ	1	0.125	0.875	0.222222	1	Strep. parasanguinis	1	1	1	8	Shared
dnaX	1	1	0	NA	NA	Strep. parasanguinis	1	8	1	8	Shared
group_2969	1	1	0	NA	NA	Strep. parasanguinis	1	8	1	8	Shared
csbD	1	0.125	0.875	0.222222	1	Strep. parasanguinis	1	1	1	8	Shared
acuI~~~yhfP	0	0	0	NA	NA	Strep. parasanguinis	0	0	1	8	Absent
wcaA	0	0	0	NA	NA	Strep. parasanguinis	0	0	1	8	Absent
group_2345	0	0	0	NA	NA	Strep. parasanguinis	0	0	1	8	Absent
group_1558	1	1	0	NA	NA	Strep. parasanguinis	1	8	1	8	Shared
group_1545	0	0	0	NA	NA	Strep. parasanguinis	0	0	1	8	Absent
group_1331	0	0	0	NA	NA	Strep. parasanguinis	0	0	1	8	Absent
group_1262	0	0	0	NA	NA	Strep. parasanguinis	0	0	1	8	Absent
argR	0	0	0	NA	NA	Strep. parasanguinis	0	0	1	8	Absent
group_20617	0	0	0	NA	NA	Strep. parasanguinis	0	0	1	8	Absent
group_20432	0	0	0	NA	NA	Strep. parasanguinis	0	0	1	8	Absent
group_19790	0	0	0	NA	NA	Strep. parasanguinis	0	0	1	8	Absent
group_7095	1	1	0	NA	NA	Strep. parasanguinis	1	8	1	8	Shared
fruA~~~luxR	1	1	0	NA	NA	Strep. parasanguinis	1	8	1	8	Shared
group_3074	1	1	0	NA	NA	Strep. parasanguinis	1	8	1	8	Shared
group_3050	1	1	0	NA	NA	Strep. parasanguinis	1	8	1	8	Shared
group_3049	1	1	0	NA	NA	Strep. parasanguinis	1	8	1	8	Shared
group_2839	0	0	0	NA	NA	Strep. parasanguinis	0	0	1	8	Absent
group_2795	0	0	0	NA	NA	Strep. parasanguinis	0	0	1	8	Absent
group_2652	0	0	0	NA	NA	Strep. parasanguinis	0	0	1	8	Absent
group_2523	1	1	0	NA	NA	Strep. parasanguinis	1	8	1	8	Shared
galE	0	0.25	0.25	1	1	Strep. parasanguinis	0	2	1	8	Oral-specific
group_1128	0	0	0	NA	NA	Strep. parasanguinis	0	0	1	8	Absent
group_921	0	0	0	NA	NA	Strep. parasanguinis	0	0	1	8	Absent
group_731	0	0	0	NA	NA	Strep. parasanguinis	0	0	1	8	Absent
group_21653	0	0	0	NA	NA	Strep. parasanguinis	0	0	1	8	Absent
group_21224	0	0	0	NA	NA	Strep. parasanguinis	0	0	1	8	Absent
group_20898	0	0	0	NA	NA	Strep. parasanguinis	0	0	1	8	Absent
group_20748	0	0	0	NA	NA	Strep. parasanguinis	0	0	1	8	Absent
group_20386	0	0	0	NA	NA	Strep. parasanguinis	0	0	1	8	Absent
group_20242	0	0	0	NA	NA	Strep. parasanguinis	0	0	1	8	Absent
degV~~~trmH	0	0	0	NA	NA	Strep. parasanguinis	0	0	1	8	Absent
group_7139	0	0	0	NA	NA	Strep. parasanguinis	0	0	1	8	Absent
group_6891	0	0	0	NA	NA	Strep. parasanguinis	0	0	1	8	Absent
group_3129	0	0	0	NA	NA	Strep. parasanguinis	0	0	1	8	Absent
group_3128	0	0	0	NA	NA	Strep. parasanguinis	0	0	1	8	Absent
group_2960	0	0	0	NA	NA	Strep. parasanguinis	0	0	1	8	Absent
nagB	0	0	0	NA	NA	Strep. parasanguinis	0	0	1	8	Absent
group_2865	0	0	0	NA	NA	Strep. parasanguinis	0	0	1	8	Absent
group_2756	0	0.5	0.5	1	1	Strep. parasanguinis	0	4	1	8	Oral-specific
group_2716	0	0	0	NA	NA	Strep. parasanguinis	0	0	1	8	Absent
group_2708	0	0	0	NA	NA	Strep. parasanguinis	0	0	1	8	Absent
group_2526	0	0	0	NA	NA	Strep. parasanguinis	0	0	1	8	Absent
group_2525	0	0	0	NA	NA	Strep. parasanguinis	0	0	1	8	Absent
hisM~~~glnM	0	0	0	NA	NA	Strep. parasanguinis	0	0	1	8	Absent
phoP	0	0	0	NA	NA	Strep. parasanguinis	0	0	1	8	Absent
prmC	0	0	0	NA	NA	Strep. parasanguinis	0	0	1	8	Absent
group_2461	0	0	0	NA	NA	Strep. parasanguinis	0	0	1	8	Absent
group_2282	0	0	0	NA	NA	Strep. parasanguinis	0	0	1	8	Absent
group_2236	0	0	0	NA	NA	Strep. parasanguinis	0	0	1	8	Absent
coaE	0	0	0	NA	NA	Strep. parasanguinis	0	0	1	8	Absent
group_1966	0	0	0	NA	NA	Strep. parasanguinis	0	0	1	8	Absent
group_1945	0	0	0	NA	NA	Strep. parasanguinis	0	0	1	8	Absent
group_1933	0	0	0	NA	NA	Strep. parasanguinis	0	0	1	8	Absent
group_1826	0	0	0	NA	NA	Strep. parasanguinis	0	0	1	8	Absent
group_1580	1	1	0	NA	NA	Strep. parasanguinis	1	8	1	8	Shared
albF	0	0	0	NA	NA	Strep. parasanguinis	0	0	1	8	Absent
group_1318	0	0	0	NA	NA	Strep. parasanguinis	0	0	1	8	Absent
yidC	0	0	0	NA	NA	Strep. parasanguinis	0	0	1	8	Absent
group_1291	1	0.5	0.5	1	1	Strep. parasanguinis	1	4	1	8	Shared
group_1245	0	0	0	NA	NA	Strep. parasanguinis	0	0	1	8	Absent
aF2118	0	0.375	0.375	1	1	Strep. parasanguinis	0	3	1	8	Oral-specific
group_264	0	0	0	NA	NA	Strep. parasanguinis	0	0	1	8	Absent
citS~~~yesM	0	0	0	NA	NA	Strep. parasanguinis	0	0	1	8	Absent
group_21347	0	0	0	NA	NA	Strep. parasanguinis	0	0	1	8	Absent
group_21204	0	0	0	NA	NA	Strep. parasanguinis	0	0	1	8	Absent
group_19254	0	0	0	NA	NA	Strep. parasanguinis	0	0	1	8	Absent
group_18734	0	0	0	NA	NA	Strep. parasanguinis	0	0	1	8	Absent
group_3084	1	0.125	0.875	0.222222	1	Strep. parasanguinis	1	1	1	8	Shared
group_2951	1	0.75	0.25	1	1	Strep. parasanguinis	1	6	1	8	Shared
group_2827	0	0	0	NA	NA	Strep. parasanguinis	0	0	1	8	Absent
group_2796	0	0.125	0.125	1	1	Strep. parasanguinis	0	1	1	8	Oral-specific
group_2775	0	0	0	NA	NA	Strep. parasanguinis	0	0	1	8	Absent
recX	0	0	0	NA	NA	Strep. parasanguinis	0	0	1	8	Absent
group_2468	0	0	0	NA	NA	Strep. parasanguinis	0	0	1	8	Absent
group_2379	0	0.125	0.125	1	1	Strep. parasanguinis	0	1	1	8	Oral-specific
group_2361	0	0	0	NA	NA	Strep. parasanguinis	0	0	1	8	Absent
group_2321	0	0	0	NA	NA	Strep. parasanguinis	0	0	1	8	Absent
group_2260	0	0	0	NA	NA	Strep. parasanguinis	0	0	1	8	Absent
group_2238	0	0	0	NA	NA	Strep. parasanguinis	0	0	1	8	Absent
group_2237	0	0	0	NA	NA	Strep. parasanguinis	0	0	1	8	Absent
group_2195	0	0	0	NA	NA	Strep. parasanguinis	0	0	1	8	Absent
group_2194	0	0.625	0.625	0.444444	1	Strep. parasanguinis	0	5	1	8	Oral-specific
group_2044	0	0	0	NA	NA	Strep. parasanguinis	0	0	1	8	Absent
coaB	0	0	0	NA	NA	Strep. parasanguinis	0	0	1	8	Absent
lacC~~~pfkB~~~lacC1	1	1	0	NA	NA	Strep. parasanguinis	1	8	1	8	Shared
ywpJ	0	0	0	NA	NA	Strep. parasanguinis	0	0	1	8	Absent
group_1460	0	0	0	NA	NA	Strep. parasanguinis	0	0	1	8	Absent
group_1027	0	0	0	NA	NA	Strep. parasanguinis	0	0	1	8	Absent
group_224	0	0	0	NA	NA	Strep. parasanguinis	0	0	1	8	Absent
yxdM	0	0	0	NA	NA	Strep. parasanguinis	0	0	1	8	Absent
aliA	0	0	0	NA	NA	Strep. parasanguinis	0	0	1	8	Absent
group_18297	0	0	0	NA	NA	Strep. parasanguinis	0	0	1	8	Absent
group_7099	0	0	0	NA	NA	Strep. parasanguinis	0	0	1	8	Absent
group_3102	0	0	0	NA	NA	Strep. parasanguinis	0	0	1	8	Absent
ybhL	0	0	0	NA	NA	Strep. parasanguinis	0	0	1	8	Absent
group_3101	0	0	0	NA	NA	Strep. parasanguinis	0	0	1	8	Absent
group_3100	0	0	0	NA	NA	Strep. parasanguinis	0	0	1	8	Absent
group_3091	0	0	0	NA	NA	Strep. parasanguinis	0	0	1	8	Absent
mhqR~~~marR	0	0	0	NA	NA	Strep. parasanguinis	0	0	1	8	Absent
group_2961	0	0	0	NA	NA	Strep. parasanguinis	0	0	1	8	Absent
nagD	1	1	0	NA	NA	Strep. parasanguinis	1	8	1	8	Shared
group_2852	1	1	0	NA	NA	Strep. parasanguinis	1	8	1	8	Shared
group_2657	0	0	0	NA	NA	Strep. parasanguinis	0	0	1	8	Absent
group_2641	0	0	0	NA	NA	Strep. parasanguinis	0	0	1	8	Absent
trhO	1	1	0	NA	NA	Strep. parasanguinis	1	8	1	8	Shared
group_2472	0	0	0	NA	NA	Strep. parasanguinis	0	0	1	8	Absent
group_2370	1	1	0	NA	NA	Strep. parasanguinis	1	8	1	8	Shared
group_2319	0	0	0	NA	NA	Strep. parasanguinis	0	0	1	8	Absent
group_2125	0	0	0	NA	NA	Strep. parasanguinis	0	0	1	8	Absent
group_1590	0	0	0	NA	NA	Strep. parasanguinis	0	0	1	8	Absent
group_1549	1	0.75	0.25	1	1	Strep. parasanguinis	1	6	1	8	Shared
lacA	1	0.75	0.25	1	1	Strep. parasanguinis	1	6	1	8	Shared
group_20518	0	0	0	NA	NA	Strep. parasanguinis	0	0	1	8	Absent
group_3047	1	1	0	NA	NA	Strep. parasanguinis	1	8	1	8	Shared
group_2858	0	0	0	NA	NA	Strep. parasanguinis	0	0	1	8	Absent
group_2779	0	0	0	NA	NA	Strep. parasanguinis	0	0	1	8	Absent
group_2707	0	0	0	NA	NA	Strep. parasanguinis	0	0	1	8	Absent
group_2701	0	0	0	NA	NA	Strep. parasanguinis	0	0	1	8	Absent
group_2478	0	0	0	NA	NA	Strep. parasanguinis	0	0	1	8	Absent
group_2447	0	0	0	NA	NA	Strep. parasanguinis	0	0	1	8	Absent
bglG~~~licT	0	0	0	NA	NA	Strep. parasanguinis	0	0	1	8	Absent
group_2202	0	0	0	NA	NA	Strep. parasanguinis	0	0	1	8	Absent
group_275	1	1	0	NA	NA	Strep. parasanguinis	1	8	1	8	Shared
group_68	0	0.25	0.25	1	1	Strep. parasanguinis	0	2	1	8	Oral-specific
aprE	0	0	0	NA	NA	Strep. parasanguinis	0	0	1	8	Absent
group_21624	0	0	0	NA	NA	Strep. parasanguinis	0	0	1	8	Absent
group_21443	0	0	0	NA	NA	Strep. parasanguinis	0	0	1	8	Absent
group_21378	0	0	0	NA	NA	Strep. parasanguinis	0	0	1	8	Absent
group_21329	0	0	0	NA	NA	Strep. parasanguinis	0	0	1	8	Absent
group_21310	0	0	0	NA	NA	Strep. parasanguinis	0	0	1	8	Absent
group_21240	0	0	0	NA	NA	Strep. parasanguinis	0	0	1	8	Absent
group_21122	0	0	0	NA	NA	Strep. parasanguinis	0	0	1	8	Absent
group_21057	0	0	0	NA	NA	Strep. parasanguinis	0	0	1	8	Absent
group_20793	0	0	0	NA	NA	Strep. parasanguinis	0	0	1	8	Absent
group_20774	0	0	0	NA	NA	Strep. parasanguinis	0	0	1	8	Absent
group_20689	0	0	0	NA	NA	Strep. parasanguinis	0	0	1	8	Absent
nspC	0	0	0	NA	NA	Strep. parasanguinis	0	0	1	8	Absent
aguB	0	0	0	NA	NA	Strep. parasanguinis	0	0	1	8	Absent
group_20316	0	0	0	NA	NA	Strep. parasanguinis	0	0	1	8	Absent
group_20206	0	0	0	NA	NA	Strep. parasanguinis	0	0	1	8	Absent
lys9	0	0	0	NA	NA	Strep. parasanguinis	0	0	1	8	Absent
group_19696	0	0	0	NA	NA	Strep. parasanguinis	0	0	1	8	Absent
group_18930	0	0	0	NA	NA	Strep. parasanguinis	0	0	1	8	Absent
yehU~~~yesM	0	0	0	NA	NA	Strep. parasanguinis	0	0	1	8	Absent
group_18366	0	0	0	NA	NA	Strep. parasanguinis	0	0	1	8	Absent
speE	0	0	0	NA	NA	Strep. parasanguinis	0	0	1	8	Absent
group_18137	0	0	0	NA	NA	Strep. parasanguinis	0	0	1	8	Absent
group_3059	0	0	0	NA	NA	Strep. parasanguinis	0	0	1	8	Absent
ndk	0	0	0	NA	NA	Strep. parasanguinis	0	0	1	8	Absent
group_3026	0	0	0	NA	NA	Strep. parasanguinis	0	0	1	8	Absent
fucO~~~gldA	0	0.25	0.25	1	1	Strep. parasanguinis	0	2	1	8	Oral-specific
group_2947	0	0	0	NA	NA	Strep. parasanguinis	0	0	1	8	Absent
group_2659	0	0	0	NA	NA	Strep. parasanguinis	0	0	1	8	Absent
group_2254	0	0.125	0.125	1	1	Strep. parasanguinis	0	1	1	8	Oral-specific
gpmB2	0	0	0	NA	NA	Strep. parasanguinis	0	0	1	8	Absent
tdh	0	0	0	NA	NA	Strep. parasanguinis	0	0	1	8	Absent
group_1258	0	0.375	0.375	1	1	Strep. parasanguinis	0	3	1	8	Oral-specific
group_1033	1	1	0	NA	NA	Strep. parasanguinis	1	8	1	8	Shared
ylmH	0	0	0	NA	NA	Strep. parasanguinis	0	0	1	8	Absent
coiA	0	0	0	NA	NA	Strep. parasanguinis	0	0	1	8	Absent
group_338	1	1	0	NA	NA	Strep. parasanguinis	1	8	1	8	Shared
group_21741	0	0	0	NA	NA	Strep. parasanguinis	0	0	1	8	Absent
group_21175	0	0	0	NA	NA	Strep. parasanguinis	0	0	1	8	Absent
gtcA~~~gtrA	0	0	0	NA	NA	Strep. parasanguinis	0	0	1	8	Absent
group_20901	0	0	0	NA	NA	Strep. parasanguinis	0	0	1	8	Absent
group_20334	0	0	0	NA	NA	Strep. parasanguinis	0	0	1	8	Absent
group_20243	0	0	0	NA	NA	Strep. parasanguinis	0	0	1	8	Absent
group_20174	0	0	0	NA	NA	Strep. parasanguinis	0	0	1	8	Absent
group_19362	0	0	0	NA	NA	Strep. parasanguinis	0	0	1	8	Absent
group_18056	0	0	0	NA	NA	Strep. parasanguinis	0	0	1	8	Absent
group_3099	0	0	0	NA	NA	Strep. parasanguinis	0	0	1	8	Absent
group_2987	1	0.75	0.25	1	1	Strep. parasanguinis	1	6	1	8	Shared
ahpC	0	0	0	NA	NA	Strep. parasanguinis	0	0	1	8	Absent
group_2266	0	0	0	NA	NA	Strep. parasanguinis	0	0	1	8	Absent
yfgQ	0	0	0	NA	NA	Strep. parasanguinis	0	0	1	8	Absent
group_1458	1	0.5	0.5	1	1	Strep. parasanguinis	1	4	1	8	Shared
rodZ	0	0	0	NA	NA	Strep. parasanguinis	0	0	1	8	Absent
group_898	0	0	0	NA	NA	Strep. parasanguinis	0	0	1	8	Absent
lepB	0	0	0	NA	NA	Strep. parasanguinis	0	0	1	8	Absent
group_18900	1	1	0	NA	NA	Strep. parasanguinis	1	8	1	8	Shared
group_16420	0	0	0	NA	NA	Strep. parasanguinis	0	0	1	8	Absent
group_3093	0	0	0	NA	NA	Strep. parasanguinis	0	0	1	8	Absent
group_3065	1	0.125	0.875	0.222222	1	Strep. parasanguinis	1	1	1	8	Shared
aIM24	0	0	0	NA	NA	Strep. parasanguinis	0	0	1	8	Absent
group_2634	0	0	0	NA	NA	Strep. parasanguinis	0	0	1	8	Absent
rpiR	0	0	0	NA	NA	Strep. parasanguinis	0	0	1	8	Absent
group_2245	0	0	0	NA	NA	Strep. parasanguinis	0	0	1	8	Absent
group_2103	0	0.125	0.125	1	1	Strep. parasanguinis	0	1	1	8	Oral-specific
yetF	0	0	0	NA	NA	Strep. parasanguinis	0	0	1	8	Absent
group_1767	0	0	0	NA	NA	Strep. parasanguinis	0	0	1	8	Absent
group_1635	1	0.25	0.75	0.333333	1	Strep. parasanguinis	1	2	1	8	Shared
group_1511	0	0	0	NA	NA	Strep. parasanguinis	0	0	1	8	Absent
blpZ	0	0	0	NA	NA	Strep. parasanguinis	0	0	1	8	Absent
group_624	1	1	0	NA	NA	Strep. parasanguinis	1	8	1	8	Shared
group_21789	0	0.125	0.125	1	1	Strep. parasanguinis	0	1	1	8	Oral-specific
group_21552	0	0	0	NA	NA	Strep. parasanguinis	0	0	1	8	Absent
group_19719	0	0	0	NA	NA	Strep. parasanguinis	0	0	1	8	Absent
group_19079	0	0	0	NA	NA	Strep. parasanguinis	0	0	1	8	Absent
group_18140	0	0	0	NA	NA	Strep. parasanguinis	0	0	1	8	Absent
bglB	0	0	0	NA	NA	Strep. parasanguinis	0	0	1	8	Absent
group_2702	0	0.5	0.5	1	1	Strep. parasanguinis	0	4	1	8	Oral-specific
group_2365	0	0	0	NA	NA	Strep. parasanguinis	0	0	1	8	Absent
group_1513	0	0	0	NA	NA	Strep. parasanguinis	0	0	1	8	Absent
thiW	0	0.125	0.125	1	1	Strep. parasanguinis	0	1	1	8	Oral-specific
tenA	0	0.125	0.125	1	1	Strep. parasanguinis	0	1	1	8	Oral-specific
thiM~~~thiM2	0	0.125	0.125	1	1	Strep. parasanguinis	0	1	1	8	Oral-specific
thiE~~~thiE2	0	0.125	0.125	1	1	Strep. parasanguinis	0	1	1	8	Oral-specific
group_780	0	0.125	0.125	1	1	Strep. parasanguinis	0	1	1	8	Oral-specific
ccmA	0	0.125	0.125	1	1	Strep. parasanguinis	0	1	1	8	Oral-specific
group_452	0	0	0	NA	NA	Strep. parasanguinis	0	0	1	8	Absent
ykoE	0	0.125	0.125	1	1	Strep. parasanguinis	0	1	1	8	Oral-specific
blpL	0	0	0	NA	NA	Strep. parasanguinis	0	0	1	8	Absent
group_20853	0	0	0	NA	NA	Strep. parasanguinis	0	0	1	8	Absent
group_12316	0	0.25	0.25	1	1	Strep. parasanguinis	0	2	1	8	Oral-specific
group_6989	0	0	0	NA	NA	Strep. parasanguinis	0	0	1	8	Absent
group_2955	0	0.375	0.375	1	1	Strep. parasanguinis	0	3	1	8	Oral-specific
group_2953	0	0	0	NA	NA	Strep. parasanguinis	0	0	1	8	Absent
yjjG~~~pynA~~~yigB	0	0	0	NA	NA	Strep. parasanguinis	0	0	1	8	Absent
group_2375	1	0.25	0.75	0.333333	1	Strep. parasanguinis	1	2	1	8	Shared
group_2031	0	0	0	NA	NA	Strep. parasanguinis	0	0	1	8	Absent
group_1889	1	1	0	NA	NA	Strep. parasanguinis	1	8	1	8	Shared
group_1888	1	1	0	NA	NA	Strep. parasanguinis	1	8	1	8	Shared
group_1887	1	1	0	NA	NA	Strep. parasanguinis	1	8	1	8	Shared
tcyN~~~glnQ	1	0.875	0.125	1	1	Strep. parasanguinis	1	7	1	8	Shared
group_1886	1	1	0	NA	NA	Strep. parasanguinis	1	8	1	8	Shared
group_1561	1	1	0	NA	NA	Strep. parasanguinis	1	8	1	8	Shared
group_1509	1	0.375	0.625	0.444444	1	Strep. parasanguinis	1	3	1	8	Shared
group_1333	1	0.625	0.375	1	1	Strep. parasanguinis	1	5	1	8	Shared
group_171	0	0	0	NA	NA	Strep. parasanguinis	0	0	1	8	Absent
group_141	0	0	0	NA	NA	Strep. parasanguinis	0	0	1	8	Absent
sigW	0	0	0	NA	NA	Strep. parasanguinis	0	0	1	8	Absent
group_21465	0	0	0	NA	NA	Strep. parasanguinis	0	0	1	8	Absent
group_21146	0	0	0	NA	NA	Strep. parasanguinis	0	0	1	8	Absent
group_21036	0	0	0	NA	NA	Strep. parasanguinis	0	0	1	8	Absent
group_20524	0	0.375	0.375	1	1	Strep. parasanguinis	0	3	1	8	Oral-specific
group_20470	0	0	0	NA	NA	Strep. parasanguinis	0	0	1	8	Absent
group_20004	0	0.375	0.375	1	1	Strep. parasanguinis	0	3	1	8	Oral-specific
group_19842	0	0.25	0.25	1	1	Strep. parasanguinis	0	2	1	8	Oral-specific
group_16447	0	0	0	NA	NA	Strep. parasanguinis	0	0	1	8	Absent
group_2982	0	0.375	0.375	1	1	Strep. parasanguinis	0	3	1	8	Oral-specific
group_2856	0	0.375	0.375	1	1	Strep. parasanguinis	0	3	1	8	Oral-specific
ybaN	0	0	0	NA	NA	Strep. parasanguinis	0	0	1	8	Absent
group_2510	0	0.625	0.625	0.444444	1	Strep. parasanguinis	0	5	1	8	Oral-specific
group_2169	0	0	0	NA	NA	Strep. parasanguinis	0	0	1	8	Absent
mutT~~~yjhB	0	0.5	0.5	1	1	Strep. parasanguinis	0	4	1	8	Oral-specific
group_21682	0	0.5	0.5	1	1	Strep. parasanguinis	0	4	1	8	Oral-specific
group_21603	0	0	0	NA	NA	Strep. parasanguinis	0	0	1	8	Absent
group_21081	0	0.375	0.375	1	1	Strep. parasanguinis	0	3	1	8	Oral-specific
group_2895	0	0	0	NA	NA	Strep. parasanguinis	0	0	1	8	Absent
group_2834	0	0.625	0.625	0.444444	1	Strep. parasanguinis	0	5	1	8	Oral-specific
group_2647	0	0	0	NA	NA	Strep. parasanguinis	0	0	1	8	Absent
phnC	1	0.5	0.5	1	1	Strep. parasanguinis	1	4	1	8	Shared
group_2476	0	0	0	NA	NA	Strep. parasanguinis	0	0	1	8	Absent
rpmG	1	0.625	0.375	1	1	Strep. parasanguinis	1	5	1	8	Shared
group_2006	0	0.375	0.375	1	1	Strep. parasanguinis	0	3	1	8	Oral-specific
mviN	0	0	0	NA	NA	Strep. parasanguinis	0	0	1	8	Absent
group_1024	0	0	0	NA	NA	Strep. parasanguinis	0	0	1	8	Absent
padR	1	1	0	NA	NA	Strep. parasanguinis	1	8	1	8	Shared
group_350	0	0.75	0.75	0.333333	1	Strep. parasanguinis	0	6	1	8	Oral-specific
group_21765	0	0	0	NA	NA	Strep. parasanguinis	0	0	1	8	Absent
group_21094	0	0	0	NA	NA	Strep. parasanguinis	0	0	1	8	Absent
group_20884	0	0.25	0.25	1	1	Strep. parasanguinis	0	2	1	8	Oral-specific
group_20870	0	0.375	0.375	1	1	Strep. parasanguinis	0	3	1	8	Oral-specific
group_20852	0	0	0	NA	NA	Strep. parasanguinis	0	0	1	8	Absent
group_20690	0	0	0	NA	NA	Strep. parasanguinis	0	0	1	8	Absent
group_20550	0	0.25	0.25	1	1	Strep. parasanguinis	0	2	1	8	Oral-specific
group_18109	0	0.25	0.25	1	1	Strep. parasanguinis	0	2	1	8	Oral-specific
acpA	0	0	0	NA	NA	Strep. parasanguinis	0	0	1	8	Absent
group_2925	0	0	0	NA	NA	Strep. parasanguinis	0	0	1	8	Absent
group_2800	0	0	0	NA	NA	Strep. parasanguinis	0	0	1	8	Absent
group_2604	0	0	0	NA	NA	Strep. parasanguinis	0	0	1	8	Absent
group_2407	0	0	0	NA	NA	Strep. parasanguinis	0	0	1	8	Absent
proX	1	1	0	NA	NA	Strep. parasanguinis	1	8	1	8	Shared
scpC	1	1	0	NA	NA	Strep. parasanguinis	1	8	1	8	Shared
group_2124	0	0	0	NA	NA	Strep. parasanguinis	0	0	1	8	Absent
group_2114	0	0	0	NA	NA	Strep. parasanguinis	0	0	1	8	Absent
group_1985	0	0.5	0.5	1	1	Strep. parasanguinis	0	4	1	8	Oral-specific
group_1713	0	0.25	0.25	1	1	Strep. parasanguinis	0	2	1	8	Oral-specific
group_1683	0	0.25	0.25	1	1	Strep. parasanguinis	0	2	1	8	Oral-specific
group_1675	0	0	0	NA	NA	Strep. parasanguinis	0	0	1	8	Absent
jag	0	0	0	NA	NA	Strep. parasanguinis	0	0	1	8	Absent
icd	0	0	0	NA	NA	Strep. parasanguinis	0	0	1	8	Absent
group_1200	0	0	0	NA	NA	Strep. parasanguinis	0	0	1	8	Absent
group_1199	0	0	0	NA	NA	Strep. parasanguinis	0	0	1	8	Absent
yaaA	0	0	0	NA	NA	Strep. parasanguinis	0	0	1	8	Absent
group_1102	0	0	0	NA	NA	Strep. parasanguinis	0	0	1	8	Absent
group_945	0	0	0	NA	NA	Strep. parasanguinis	0	0	1	8	Absent
sfcA	0	0.25	0.25	1	1	Strep. parasanguinis	0	2	1	8	Oral-specific
group_527	0	0	0	NA	NA	Strep. parasanguinis	0	0	1	8	Absent
wefK~~~yiaH	0	0	0	NA	NA	Strep. parasanguinis	0	0	1	8	Absent
group_163	0	0	0	NA	NA	Strep. parasanguinis	0	0	1	8	Absent
traX	0	0	0	NA	NA	Strep. parasanguinis	0	0	1	8	Absent
group_52	1	1	0	NA	NA	Strep. parasanguinis	1	8	1	8	Shared
group_20824	0	0	0	NA	NA	Strep. parasanguinis	0	0	1	8	Absent
group_20585	0	0.25	0.25	1	1	Strep. parasanguinis	0	2	1	8	Oral-specific
group_20471	0	0	0	NA	NA	Strep. parasanguinis	0	0	1	8	Absent
nlpC	0	0.25	0.25	1	1	Strep. parasanguinis	0	2	1	8	Oral-specific
group_19411	0	0	0	NA	NA	Strep. parasanguinis	0	0	1	8	Absent
group_19340	0	0.25	0.25	1	1	Strep. parasanguinis	0	2	1	8	Oral-specific
group_19306	0	0.25	0.25	1	1	Strep. parasanguinis	0	2	1	8	Oral-specific
group_19305	0	0.25	0.25	1	1	Strep. parasanguinis	0	2	1	8	Oral-specific
group_19047	0	0.25	0.25	1	1	Strep. parasanguinis	0	2	1	8	Oral-specific
group_18024	0	0.25	0.25	1	1	Strep. parasanguinis	0	2	1	8	Oral-specific
group_16429	0	0	0	NA	NA	Strep. parasanguinis	0	0	1	8	Absent
group_16187	1	1	0	NA	NA	Strep. parasanguinis	1	8	1	8	Shared
group_15537	0	0.25	0.25	1	1	Strep. parasanguinis	0	2	1	8	Oral-specific
group_15535	0	0.25	0.25	1	1	Strep. parasanguinis	0	2	1	8	Oral-specific
group_15532	0	0.25	0.25	1	1	Strep. parasanguinis	0	2	1	8	Oral-specific
group_6977	0	0	0	NA	NA	Strep. parasanguinis	0	0	1	8	Absent
group_2873	0	0	0	NA	NA	Strep. parasanguinis	0	0	1	8	Absent
group_2746	0	0	0	NA	NA	Strep. parasanguinis	0	0	1	8	Absent
group_2519	0	0.25	0.25	1	1	Strep. parasanguinis	0	2	1	8	Oral-specific
group_2515	0	0	0	NA	NA	Strep. parasanguinis	0	0	1	8	Absent
group_2493	0	0	0	NA	NA	Strep. parasanguinis	0	0	1	8	Absent
group_2344	0	0	0	NA	NA	Strep. parasanguinis	0	0	1	8	Absent
rfbD	0	0	0	NA	NA	Strep. parasanguinis	0	0	1	8	Absent
group_2283	0	0	0	NA	NA	Strep. parasanguinis	0	0	1	8	Absent
group_1674	0	0	0	NA	NA	Strep. parasanguinis	0	0	1	8	Absent
group_1614	0	0.25	0.25	1	1	Strep. parasanguinis	0	2	1	8	Oral-specific
group_1569	1	1	0	NA	NA	Strep. parasanguinis	1	8	1	8	Shared
yjhB	0	0	0	NA	NA	Strep. parasanguinis	0	0	1	8	Absent
int	0	0.25	0.25	1	1	Strep. parasanguinis	0	2	1	8	Oral-specific
group_754	0	0	0	NA	NA	Strep. parasanguinis	0	0	1	8	Absent
xis	0	0.25	0.25	1	1	Strep. parasanguinis	0	2	1	8	Oral-specific
group_722	0	0.25	0.25	1	1	Strep. parasanguinis	0	2	1	8	Oral-specific
hsdM	0	0.375	0.375	1	1	Strep. parasanguinis	0	3	1	8	Oral-specific
rpoE	0	0.25	0.25	1	1	Strep. parasanguinis	0	2	1	8	Oral-specific
hipB~~~xRE	0	0.25	0.25	1	1	Strep. parasanguinis	0	2	1	8	Oral-specific
group_396	1	1	0	NA	NA	Strep. parasanguinis	1	8	1	8	Shared
tetM~~~tetM	0	0.25	0.25	1	1	Strep. parasanguinis	0	2	1	8	Oral-specific
yabE	0	0	0	NA	NA	Strep. parasanguinis	0	0	1	8	Absent
group_21402	1	1	0	NA	NA	Strep. parasanguinis	1	8	1	8	Shared
group_21148	0	0	0	NA	NA	Strep. parasanguinis	0	0	1	8	Absent
group_18345	0	0	0	NA	NA	Strep. parasanguinis	0	0	1	8	Absent
group_18280	0	0.125	0.125	1	1	Strep. parasanguinis	0	1	1	8	Oral-specific
group_18092	0	0	0	NA	NA	Strep. parasanguinis	0	0	1	8	Absent
group_16297	1	1	0	NA	NA	Strep. parasanguinis	1	8	1	8	Shared
group_3110	0	0	0	NA	NA	Strep. parasanguinis	0	0	1	8	Absent
group_3105	0	0	0	NA	NA	Strep. parasanguinis	0	0	1	8	Absent
group_3085	0	0	0	NA	NA	Strep. parasanguinis	0	0	1	8	Absent
group_3041	1	1	0	NA	NA	Strep. parasanguinis	1	8	1	8	Shared
group_3040	1	1	0	NA	NA	Strep. parasanguinis	1	8	1	8	Shared
group_2989	1	1	0	NA	NA	Strep. parasanguinis	1	8	1	8	Shared
pknB	1	1	0	NA	NA	Strep. parasanguinis	1	8	1	8	Shared
group_2696	1	1	0	NA	NA	Strep. parasanguinis	1	8	1	8	Shared
rsmB~~~nusB	1	1	0	NA	NA	Strep. parasanguinis	1	8	1	8	Shared
group_2695	1	1	0	NA	NA	Strep. parasanguinis	1	8	1	8	Shared
group_2694	1	1	0	NA	NA	Strep. parasanguinis	1	8	1	8	Shared
group_2693	1	1	0	NA	NA	Strep. parasanguinis	1	8	1	8	Shared
group_2692	1	1	0	NA	NA	Strep. parasanguinis	1	8	1	8	Shared
trxB	1	1	0	NA	NA	Strep. parasanguinis	1	8	1	8	Shared
glnQ~~~yxeN	1	1	0	NA	NA	Strep. parasanguinis	1	8	1	8	Shared
group_2600	1	1	0	NA	NA	Strep. parasanguinis	1	8	1	8	Shared
obgE~~~cgtA	1	1	0	NA	NA	Strep. parasanguinis	1	8	1	8	Shared
group_2518	1	1	0	NA	NA	Strep. parasanguinis	1	8	1	8	Shared
degV	1	1	0	NA	NA	Strep. parasanguinis	1	8	1	8	Shared
dapB	1	1	0	NA	NA	Strep. parasanguinis	1	8	1	8	Shared
cca	1	1	0	NA	NA	Strep. parasanguinis	1	8	1	8	Shared
group_2331	1	1	0	NA	NA	Strep. parasanguinis	1	8	1	8	Shared
yxeP	1	1	0	NA	NA	Strep. parasanguinis	1	8	1	8	Shared
tcyA	1	1	0	NA	NA	Strep. parasanguinis	1	8	1	8	Shared
ydhF	0	0	0	NA	NA	Strep. parasanguinis	0	0	1	8	Absent
group_2037	1	0.625	0.375	1	1	Strep. parasanguinis	1	5	1	8	Shared
group_1909	0	0	0	NA	NA	Strep. parasanguinis	0	0	1	8	Absent
group_1907	1	0.625	0.375	1	1	Strep. parasanguinis	1	5	1	8	Shared
group_1659	1	1	0	NA	NA	Strep. parasanguinis	1	8	1	8	Shared
group_1550	0	0.75	0.75	0.333333	1	Strep. parasanguinis	0	6	1	8	Oral-specific
sepM	1	1	0	NA	NA	Strep. parasanguinis	1	8	1	8	Shared
group_1517	1	1	0	NA	NA	Strep. parasanguinis	1	8	1	8	Shared
rlmN	1	1	0	NA	NA	Strep. parasanguinis	1	8	1	8	Shared
coaD	1	1	0	NA	NA	Strep. parasanguinis	1	8	1	8	Shared
rsmD	1	1	0	NA	NA	Strep. parasanguinis	1	8	1	8	Shared
group_1235	0	0.375	0.375	1	1	Strep. parasanguinis	0	3	1	8	Oral-specific
trpB	1	1	0	NA	NA	Strep. parasanguinis	1	8	1	8	Shared
group_1100	0	0	0	NA	NA	Strep. parasanguinis	0	0	1	8	Absent
group_688	0	0	0	NA	NA	Strep. parasanguinis	0	0	1	8	Absent
group_233	0	0.375	0.375	1	1	Strep. parasanguinis	0	3	1	8	Oral-specific
hemW	0	0	0	NA	NA	Strep. parasanguinis	0	0	1	8	Absent
group_20784	0	0	0	NA	NA	Strep. parasanguinis	0	0	1	8	Absent
group_20485	0	0.25	0.25	1	1	Strep. parasanguinis	0	2	1	8	Oral-specific
strH	0	0	0	NA	NA	Strep. parasanguinis	0	0	1	8	Absent
group_20392	0	0	0	NA	NA	Strep. parasanguinis	0	0	1	8	Absent
group_20367	0	0	0	NA	NA	Strep. parasanguinis	0	0	1	8	Absent
group_20310	0	0.875	0.875	0.222222	1	Strep. parasanguinis	0	7	1	8	Oral-specific
group_19943	0	0.25	0.25	1	1	Strep. parasanguinis	0	2	1	8	Oral-specific
group_19586	1	1	0	NA	NA	Strep. parasanguinis	1	8	1	8	Shared
pcp	0	0	0	NA	NA	Strep. parasanguinis	0	0	1	8	Absent
group_19027	0	0.75	0.75	0.333333	1	Strep. parasanguinis	0	6	1	8	Oral-specific
group_16854	0	0	0	NA	NA	Strep. parasanguinis	0	0	1	8	Absent
group_16652	0	0	0	NA	NA	Strep. parasanguinis	0	0	1	8	Absent
group_3123	0	0	0	NA	NA	Strep. parasanguinis	0	0	1	8	Absent
group_3089	0	0	0	NA	NA	Strep. parasanguinis	0	0	1	8	Absent
gorA	1	1	0	NA	NA	Strep. parasanguinis	1	8	1	8	Shared
group_2893	1	1	0	NA	NA	Strep. parasanguinis	1	8	1	8	Shared
group_2887	0	0	0	NA	NA	Strep. parasanguinis	0	0	1	8	Absent
group_2698	1	1	0	NA	NA	Strep. parasanguinis	1	8	1	8	Shared
group_2697	1	1	0	NA	NA	Strep. parasanguinis	1	8	1	8	Shared
liaR~~~vraR	1	1	0	NA	NA	Strep. parasanguinis	1	8	1	8	Shared
group_2691	1	1	0	NA	NA	Strep. parasanguinis	1	8	1	8	Shared
group_2690	1	1	0	NA	NA	Strep. parasanguinis	1	8	1	8	Shared
group_2689	1	1	0	NA	NA	Strep. parasanguinis	1	8	1	8	Shared
group_2688	1	1	0	NA	NA	Strep. parasanguinis	1	8	1	8	Shared
group_2687	1	1	0	NA	NA	Strep. parasanguinis	1	8	1	8	Shared
yspA	1	1	0	NA	NA	Strep. parasanguinis	1	8	1	8	Shared
group_2685	1	1	0	NA	NA	Strep. parasanguinis	1	8	1	8	Shared
pepC	1	1	0	NA	NA	Strep. parasanguinis	1	8	1	8	Shared
nadE	1	1	0	NA	NA	Strep. parasanguinis	1	8	1	8	Shared
pncB	1	1	0	NA	NA	Strep. parasanguinis	1	8	1	8	Shared
group_2571	1	1	0	NA	NA	Strep. parasanguinis	1	8	1	8	Shared
group_2327	0	0	0	NA	NA	Strep. parasanguinis	0	0	1	8	Absent
group_2166	0	0	0	NA	NA	Strep. parasanguinis	0	0	1	8	Absent
amiA	0	0	0	NA	NA	Strep. parasanguinis	0	0	1	8	Absent
group_1924	1	0.75	0.25	1	1	Strep. parasanguinis	1	6	1	8	Shared
group_1823	1	1	0	NA	NA	Strep. parasanguinis	1	8	1	8	Shared
group_1820	1	1	0	NA	NA	Strep. parasanguinis	1	8	1	8	Shared
group_1681	0	0.125	0.125	1	1	Strep. parasanguinis	0	1	1	8	Oral-specific
group_1661	0	0	0	NA	NA	Strep. parasanguinis	0	0	1	8	Absent
gldA	1	1	0	NA	NA	Strep. parasanguinis	1	8	1	8	Shared
repB	0	0.5	0.5	1	1	Strep. parasanguinis	0	4	1	8	Oral-specific
group_1528	0	0	0	NA	NA	Strep. parasanguinis	0	0	1	8	Absent
group_1482	1	0.375	0.625	0.444444	1	Strep. parasanguinis	1	3	1	8	Shared
ftsZ	1	1	0	NA	NA	Strep. parasanguinis	1	8	1	8	Shared
group_1129	0	0	0	NA	NA	Strep. parasanguinis	0	0	1	8	Absent
glnQ	0	0	0	NA	NA	Strep. parasanguinis	0	0	1	8	Absent
group_1111	0	0	0	NA	NA	Strep. parasanguinis	0	0	1	8	Absent
glnH	0	0	0	NA	NA	Strep. parasanguinis	0	0	1	8	Absent
hisM	0	0	0	NA	NA	Strep. parasanguinis	0	0	1	8	Absent
group_714	0	0	0	NA	NA	Strep. parasanguinis	0	0	1	8	Absent
group_180	0	0	0	NA	NA	Strep. parasanguinis	0	0	1	8	Absent
pynA~~~yigB~~~yjjG~~~yfnB	0	0	0	NA	NA	Strep. parasanguinis	0	0	1	8	Absent
group_21696	0	0	0	NA	NA	Strep. parasanguinis	0	0	1	8	Absent
group_21574	1	1	0	NA	NA	Strep. parasanguinis	1	8	1	8	Shared
group_21239	0	0	0	NA	NA	Strep. parasanguinis	0	0	1	8	Absent
group_20646	0	0	0	NA	NA	Strep. parasanguinis	0	0	1	8	Absent
group_20573	0	0	0	NA	NA	Strep. parasanguinis	0	0	1	8	Absent
group_20568	0	0.25	0.25	1	1	Strep. parasanguinis	0	2	1	8	Oral-specific
group_20306	0	0	0	NA	NA	Strep. parasanguinis	0	0	1	8	Absent
group_20095	0	0	0	NA	NA	Strep. parasanguinis	0	0	1	8	Absent
group_20068	0	0.25	0.25	1	1	Strep. parasanguinis	0	2	1	8	Oral-specific
group_19996	0	0	0	NA	NA	Strep. parasanguinis	0	0	1	8	Absent
group_19942	0	0.25	0.25	1	1	Strep. parasanguinis	0	2	1	8	Oral-specific
group_19618	0	0	0	NA	NA	Strep. parasanguinis	0	0	1	8	Absent
group_19310	0	0.25	0.25	1	1	Strep. parasanguinis	0	2	1	8	Oral-specific
group_19299	0	0	0	NA	NA	Strep. parasanguinis	0	0	1	8	Absent
group_19261	0	0.25	0.25	1	1	Strep. parasanguinis	0	2	1	8	Oral-specific
speK	0	0	0	NA	NA	Strep. parasanguinis	0	0	1	8	Absent
group_18508	0	0	0	NA	NA	Strep. parasanguinis	0	0	1	8	Absent
group_18034	0	0.25	0.25	1	1	Strep. parasanguinis	0	2	1	8	Oral-specific
mobT	0	0.25	0.25	1	1	Strep. parasanguinis	0	2	1	8	Oral-specific
group_17931	0	0.25	0.25	1	1	Strep. parasanguinis	0	2	1	8	Oral-specific
group_17039	0	0	0	NA	NA	Strep. parasanguinis	0	0	1	8	Absent
group_16743	0	0	0	NA	NA	Strep. parasanguinis	0	0	1	8	Absent
group_15605	0	0.25	0.25	1	1	Strep. parasanguinis	0	2	1	8	Oral-specific
group_13516	0	0.25	0.25	1	1	Strep. parasanguinis	0	2	1	8	Oral-specific
group_3090	1	1	0	NA	NA	Strep. parasanguinis	1	8	1	8	Shared
group_3039	1	1	0	NA	NA	Strep. parasanguinis	1	8	1	8	Shared
group_2983	1	1	0	NA	NA	Strep. parasanguinis	1	8	1	8	Shared
hydD~~~bpoC	1	1	0	NA	NA	Strep. parasanguinis	1	8	1	8	Shared
group_2911	0	0	0	NA	NA	Strep. parasanguinis	0	0	1	8	Absent
group_2700	1	1	0	NA	NA	Strep. parasanguinis	1	8	1	8	Shared
yigZ	1	1	0	NA	NA	Strep. parasanguinis	1	8	1	8	Shared
group_2699	1	1	0	NA	NA	Strep. parasanguinis	1	8	1	8	Shared
ypeA	0	0	0	NA	NA	Strep. parasanguinis	0	0	1	8	Absent
yghU	1	1	0	NA	NA	Strep. parasanguinis	1	8	1	8	Shared
group_2503	0	0	0	NA	NA	Strep. parasanguinis	0	0	1	8	Absent
group_1870	1	1	0	NA	NA	Strep. parasanguinis	1	8	1	8	Shared
trkH	1	1	0	NA	NA	Strep. parasanguinis	1	8	1	8	Shared
group_1522	0	0	0	NA	NA	Strep. parasanguinis	0	0	1	8	Absent
tagG	0	0.625	0.625	0.444444	1	Strep. parasanguinis	0	5	1	8	Oral-specific
lacB	0	0	0	NA	NA	Strep. parasanguinis	0	0	1	8	Absent
lexA	1	1	0	NA	NA	Strep. parasanguinis	1	8	1	8	Shared
umuC	1	1	0	NA	NA	Strep. parasanguinis	1	8	1	8	Shared
group_1025	0	0	0	NA	NA	Strep. parasanguinis	0	0	1	8	Absent
drrB	1	0.5	0.5	1	1	Strep. parasanguinis	1	4	1	8	Shared
tetR~~~rutR	1	0.5	0.5	1	1	Strep. parasanguinis	1	4	1	8	Shared
dhaL	0	0	0	NA	NA	Strep. parasanguinis	0	0	1	8	Absent
dhaK	0	0	0	NA	NA	Strep. parasanguinis	0	0	1	8	Absent
hutH	1	1	0	NA	NA	Strep. parasanguinis	1	8	1	8	Shared
steT	1	1	0	NA	NA	Strep. parasanguinis	1	8	1	8	Shared
hutI	1	1	0	NA	NA	Strep. parasanguinis	1	8	1	8	Shared
group_719	0	0.25	0.25	1	1	Strep. parasanguinis	0	2	1	8	Oral-specific
fhs1	1	1	0	NA	NA	Strep. parasanguinis	1	8	1	8	Shared
group_697	1	1	0	NA	NA	Strep. parasanguinis	1	8	1	8	Shared
hutU	1	1	0	NA	NA	Strep. parasanguinis	1	8	1	8	Shared
group_586	0	0.25	0.25	1	1	Strep. parasanguinis	0	2	1	8	Oral-specific
ftcD	1	1	0	NA	NA	Strep. parasanguinis	1	8	1	8	Shared
group_123	1	1	0	NA	NA	Strep. parasanguinis	1	8	1	8	Shared
group_116	1	1	0	NA	NA	Strep. parasanguinis	1	8	1	8	Shared
group_51	0	0	0	NA	NA	Strep. parasanguinis	0	0	1	8	Absent
group_21791	0	0	0	NA	NA	Strep. parasanguinis	0	0	1	8	Absent
group_21785	0	0	0	NA	NA	Strep. parasanguinis	0	0	1	8	Absent
group_21738	0	0	0	NA	NA	Strep. parasanguinis	0	0	1	8	Absent
group_21733	1	0.625	0.375	1	1	Strep. parasanguinis	1	5	1	8	Shared
group_21708	0	0	0	NA	NA	Strep. parasanguinis	0	0	1	8	Absent
group_21694	0	0	0	NA	NA	Strep. parasanguinis	0	0	1	8	Absent
group_21591	0	0	0	NA	NA	Strep. parasanguinis	0	0	1	8	Absent
group_21504	0	0	0	NA	NA	Strep. parasanguinis	0	0	1	8	Absent
group_21502	0	0	0	NA	NA	Strep. parasanguinis	0	0	1	8	Absent
group_21496	0	0	0	NA	NA	Strep. parasanguinis	0	0	1	8	Absent
[truncated: 249,362+ more rows]
