# Supplementary material for: The Genomic Landscape of Head and Neck Cancer-associated Streptococci
Source: Research Square preprint supplement (doi:10.21203/rs.3.rs-8400357/v1), 2026-01-09
Supplement: Supplementary file 9 [file cb93f8569669a792874218c4.xlsx]

## Sheet: family_caz_counts
Supplementary Table 1: CAZyme family counts
GH (Glycoside Hydrolases): 55 families	61	Healthy
GT (GlycosylTransferases): 21 families	21	Healthy
CBM (Carbohydrate-Binding Modules): 14 families	13	Healthy
CE (Carbohydrate Esterases): 6 families	5	Healthy
PL (Polysaccharide Lyases): 2 families	3	Healthy
AA (Auxiliary Activities): 1 family	1	Healthy

## Sheet: cazy_family_healthy
Supplementary Table 2: CAZyme gene annotation per isolate
Gene.ID	CAZy.ID	isolate_id	CAZy_Class	CAZy_Family_Split	Species
contig_1_22	CBZ00766.1|GH25	ODP-AF03-102	GH	GH25	Strep. oralis
contig_1_35	CAD7245033.1|GT58	ODP-AF03-102	GT	GT58	Strep. oralis
contig_1_69	QRO07193.1|GT4	ODP-AF03-102	GT	GT4	Strep. oralis
contig_1_70	QLL95922.1|GT4	ODP-AF03-102	GT	GT4	Strep. oralis
contig_1_81	QUI22575.1|CBM50	ODP-AF03-102	CBM	CBM50	Strep. oralis
contig_1_114	QLL95967.1|GH73	ODP-AF03-102	GH	GH73	Strep. oralis
contig_1_199	AGL63871.2|GT2	ODP-AF03-102	GT	GT2	Strep. oralis
contig_1_230	QQK99637.1|CE4	ODP-AF03-102	CE	CE4	Strep. oralis
contig_1_234	UTX66813.1|GH70	ODP-AF03-102	GH	GH70	Strep. oralis
contig_1_240	WFR87453.1|CBM71|CE20|GH2	ODP-AF03-102	CBM	CBM71	Strep. oralis
contig_1_240	WFR87453.1|CBM71|CE20|GH2	ODP-AF03-102	GH	CE20	Strep. oralis
contig_1_240	WFR87453.1|CBM71|CE20|GH2	ODP-AF03-102	GH	GH2	Strep. oralis
contig_1_248	AGL63717.2|GT4	ODP-AF03-102	GT	GT4	Strep. oralis
contig_1_266	CCO10293.2|CBM50	ODP-AF03-102	CBM	CBM50	Strep. oralis
contig_1_284	QBQ55156.1|CBM50	ODP-AF03-102	CBM	CBM50	Strep. oralis
contig_1_304	QCZ58101.1|GT28	ODP-AF03-102	GT	GT28	Strep. oralis
contig_1_366	QLL96216.1|CBM50	ODP-AF03-102	CBM	CBM50	Strep. oralis
contig_1_378	CAN65674.1|GH28	ODP-AF03-102	GH	GH28	Strep. oralis
contig_2_4	AHZ47791.1|GH1	ODP-AF03-102	GH	GH1	Strep. oralis
contig_2_29	AGL64700.2|GH23	ODP-AF03-102	GH	GH23	Strep. oralis
contig_2_33	AMJ20543.1|GH13_11	ODP-AF03-102	GH	GH13_11	Strep. oralis
contig_2_35	AHZ47760.1|GH23	ODP-AF03-102	GH	GH23	Strep. oralis
contig_2_62	ANR75843.1|CBM34|GH13_20	ODP-AF03-102	CBM	CBM34	Strep. oralis
contig_2_62	ANR75843.1|CBM34|GH13_20	ODP-AF03-102	GH	GH13_20	Strep. oralis
contig_2_117	CCO12112.2|GH13_31	ODP-AF03-102	GH	GH13_31	Strep. oralis
contig_2_121	UTX66478.1|GT5	ODP-AF03-102	GT	GT5	Strep. oralis
contig_2_123	BBM21727.1|GH13_9	ODP-AF03-102	GH	GH13_9	Strep. oralis
contig_2_124	QLL98795.1|CBM48|GH13_9	ODP-AF03-102	CBM	CBM48	Strep. oralis
contig_2_124	QLL98795.1|CBM48|GH13_9	ODP-AF03-102	GH	GH13_9	Strep. oralis
contig_2_126	AHZ47679.1|CBM41|CBM48|GH13_14	ODP-AF03-102	CBM	CBM41	Strep. oralis
contig_2_126	AHZ47679.1|CBM41|CBM48|GH13_14	ODP-AF03-102	CBM	CBM48	Strep. oralis
contig_2_126	AHZ47679.1|CBM41|CBM48|GH13_14	ODP-AF03-102	GH	GH13_14	Strep. oralis
contig_2_133	BEI59196.1|GH130_1	ODP-AF03-102	GH	GH130_1	Strep. oralis
contig_2_139	CCO11994.2|GT4	ODP-AF03-102	GT	GT4	Strep. oralis
contig_2_209	CAE6204650.1|GH28	ODP-AF03-102	GH	GH28	Strep. oralis
contig_2_216	CCO11632.2|GH3	ODP-AF03-102	GH	GH3	Strep. oralis
contig_2_263	CCO12633.2|GH84	ODP-AF03-102	GH	GH84	Strep. oralis
contig_2_290	BBF72686.1|GT2	ODP-AF03-102	GT	GT2	Strep. oralis
contig_2_308	QXW62074.1|GT2	ODP-AF03-102	GT	GT2	Strep. oralis
contig_2_313	CCO09729.2|GH1	ODP-AF03-102	GH	GH1	Strep. oralis
contig_2_321	ANR76134.1|GH13_5	ODP-AF03-102	GH	GH13_5	Strep. oralis
contig_3_9	AGL63717.2|GT4	ODP-AF03-102	GT	GT4	Strep. oralis
contig_3_30	CBZ01551.1|GH92	ODP-AF03-102	GH	GH92	Strep. oralis
contig_3_32	AMH89502.1|GH125	ODP-AF03-102	GH	GH125	Strep. oralis
contig_3_33	URK67201.1|GH38	ODP-AF03-102	GH	GH38	Strep. oralis
contig_3_35	QLL97885.1|GH20	ODP-AF03-102	GH	GH20	Strep. oralis
contig_3_48	CBZ01509.1|GT2	ODP-AF03-102	GT	GT2	Strep. oralis
contig_3_54	BAV80643.1|CBM50	ODP-AF03-102	CBM	CBM50	Strep. oralis
contig_3_152	CUS04921.2|GT4	ODP-AF03-102	GT	GT4	Strep. oralis
contig_4_2	AHZ47439.1|CBM71|GH2	ODP-AF03-102	CBM	CBM71	Strep. oralis
contig_4_2	AHZ47439.1|CBM71|GH2	ODP-AF03-102	GH	GH2	Strep. oralis
contig_4_32	QXF33454.1|GH13_3	ODP-AF03-102	GH	GH13_3	Strep. oralis
contig_4_49	CCO11054.2|CBM50	ODP-AF03-102	CBM	CBM50	Strep. oralis
contig_4_54	UTX66202.1|GH8	ODP-AF03-102	GH	GH8	Strep. oralis
contig_4_55	UTX66201.1|GT2	ODP-AF03-102	GT	GT2	Strep. oralis
contig_4_58	WEA13229.1|GT0	ODP-AF03-102	GT	GT0	Strep. oralis
contig_4_71	QBQ55251.1|CBM50	ODP-AF03-102	CBM	CBM50	Strep. oralis
contig_4_93	AGJ84236.1|GT2	ODP-AF03-102	GT	GT2	Strep. oralis
contig_5_12	QLL96936.1|CBM32|GH85	ODP-AF03-102	CBM	CBM32	Strep. oralis
contig_5_12	QLL96936.1|CBM32|GH85	ODP-AF03-102	GH	GH85	Strep. oralis
contig_5_30	AHZ47131.1|GH13_29	ODP-AF03-102	GH	GH13_29	Strep. oralis
contig_5_31	QCH95999.1|GH13_29	ODP-AF03-102	GH	GH13_29	Strep. oralis
contig_5_33	QLL96918.1|GH95	ODP-AF03-102	GH	GH95	Strep. oralis
contig_5_47	UTX65909.1|GH29	ODP-AF03-102	GH	GH29	Strep. oralis
contig_6_2	CAN80640.1|GT47	ODP-AF03-102	GT	GT47	Strep. oralis
contig_6_80	CCO12102.2|GH13_31	ODP-AF03-102	GH	GH13_31	Strep. oralis
contig_6_83	QYU66396.1|GH13_23	ODP-AF03-102	GH	GH13_23	Strep. oralis
contig_6_94	QRO07883.1|GH20	ODP-AF03-102	GH	GH20	Strep. oralis
contig_6_96	QRO07881.1|GH35	ODP-AF03-102	GH	GH35	Strep. oralis
contig_7_2	QLL96314.1|GT8	ODP-AF03-102	GT	GT8	Strep. oralis
contig_7_3	AHZ48305.1|GT8	ODP-AF03-102	GT	GT8	Strep. oralis
contig_7_9	QLL96307.1|GT4	ODP-AF03-102	GT	GT4	Strep. oralis
contig_7_10	QCZ58249.1|GT8	ODP-AF03-102	GT	GT8	Strep. oralis
contig_7_50	UTX66993.1|GH32	ODP-AF03-102	GH	GH32	Strep. oralis
contig_7_51	AGL62906.2|GH13_31	ODP-AF03-102	GH	GH13_31	Strep. oralis
contig_7_64	CAD7252417.1|GH13	ODP-AF03-102	GH	GH13	Strep. oralis
contig_8_3	CBA03971.1|GT30	ODP-AF03-102	GT	GT30	Strep. oralis
contig_8_9	QRO07658.1|GT51	ODP-AF03-102	GT	GT51	Strep. oralis
contig_8_10	ANR75301.1|CBM32|GH20|GH84	ODP-AF03-102	CBM	CBM32	Strep. oralis
contig_8_10	ANR75301.1|CBM32|GH20|GH84	ODP-AF03-102	GH	GH20	Strep. oralis
contig_8_10	ANR75301.1|CBM32|GH20|GH84	ODP-AF03-102	GH	GH84	Strep. oralis
contig_8_11	QLL96372.1|CBM32|GH101	ODP-AF03-102	CBM	CBM32	Strep. oralis
contig_8_11	QLL96372.1|CBM32|GH101	ODP-AF03-102	GH	GH101	Strep. oralis
contig_8_15	QAY63367.1|GT2	ODP-AF03-102	GT	GT2	Strep. oralis
contig_8_16	UTX67101.1|GT113	ODP-AF03-102	GT	GT113	Strep. oralis
contig_8_20	BAD22623.1|GT2	ODP-AF03-102	GT	GT2	Strep. oralis
contig_8_22	QXW61162.1|GT4	ODP-AF03-102	GT	GT4	Strep. oralis
contig_8_23	ATF57322.1|GT4	ODP-AF03-102	GT	GT4	Strep. oralis
contig_8_31	VEF79632.1|GH13_31	ODP-AF03-102	GH	GH13_31	Strep. oralis
contig_8_39	AGL63717.2|GT4	ODP-AF03-102	GT	GT4	Strep. oralis
contig_8_53	CAD7226128.1|GH38	ODP-AF03-102	GH	GH38	Strep. oralis
contig_9_77	CCO11681.2|GH25	ODP-AF03-102	GH	GH25	Strep. oralis
contig_10_3	ATF56160.1|GH36	ODP-AF03-102	GH	GH36	Strep. oralis
contig_10_7	ATF56164.1|GH13_18	ODP-AF03-102	GH	GH13_18	Strep. oralis
contig_11_8	CAI32748.2|GT4	ODP-AF03-102	GT	GT4	Strep. oralis
contig_11_15	WFR86744.1|GT51	ODP-AF03-102	GT	GT51	Strep. oralis
contig_11_18	QLL96516.1|GT35	ODP-AF03-102	GT	GT35	Strep. oralis
contig_11_19	ATF57722.1|GH77	ODP-AF03-102	GH	GH77	Strep. oralis
contig_11_20	CCO11983.2|CBM50|CE4	ODP-AF03-102	CBM	CBM50	Strep. oralis
contig_11_20	CCO11983.2|CBM50|CE4	ODP-AF03-102	CE	CE4	Strep. oralis
contig_11_21	AGL62895.2|GH13	ODP-AF03-102	GH	GH13	Strep. oralis
contig_11_26	ALR08738.2|GT83	ODP-AF03-102	GT	GT83	Strep. oralis
contig_11_31	WAO96723.1|GH0	ODP-AF03-102	GH	GH0	Strep. oralis
contig_11_64	QQY18169.1|GH73	ODP-AF03-102	GH	GH73	Strep. oralis
contig_13_30	QQL00670.1|CE7	ODP-AF03-102	CE	CE7	Strep. oralis
contig_13_31	VEF79444.1|CBM40|GH33	ODP-AF03-102	CBM	CBM40	Strep. oralis
contig_13_31	VEF79444.1|CBM40|GH33	ODP-AF03-102	GH	GH33	Strep. oralis
contig_14_6	AGL64353.2|CBM50|GH25	ODP-AF03-102	CBM	CBM50	Strep. oralis
contig_14_6	AGL64353.2|CBM50|GH25	ODP-AF03-102	GH	GH25	Strep. oralis
contig_14_7	AHZ48494.1|GH1	ODP-AF03-102	GH	GH1	Strep. oralis
contig_14_20	QRO08163.1|CBM41|CBM48|GH13_12	ODP-AF03-102	CBM	CBM41	Strep. oralis
contig_14_20	QRO08163.1|CBM41|CBM48|GH13_12	ODP-AF03-102	CBM	CBM48	Strep. oralis
contig_14_20	QRO08163.1|CBM41|CBM48|GH13_12	ODP-AF03-102	GH	GH13_12	Strep. oralis
contig_14_22	CCO12868.2|GH1	ODP-AF03-102	GH	GH1	Strep. oralis
contig_15_2	AGL63702.2|GT4	ODP-AF03-102	GT	GT4	Strep. oralis
contig_16_15	AHZ46990.1|CBM50	ODP-AF03-102	CBM	CBM50	Strep. oralis
contig_16_21	VEF78250.1|CE9	ODP-AF03-102	CE	CE9	Strep. oralis
contig_16_44	UNV67707.1|GT51	ODP-AF03-102	GT	GT51	Strep. oralis
contig_17_5	QYO62262.1|GH13	ODP-AF03-102	GH	GH13	Strep. oralis
contig_17_17	CAG7911095.1|GH5_11	ODP-AF03-102	GH	GH5_11	Strep. oralis
contig_17_27	AGL64345.2|GT2	ODP-AF03-102	GT	GT2	Strep. oralis
contig_1_48	AGL64020.2|AA10	ODP-AF04-102	AA	AA10	Strep. salivarius
contig_1_76	CAE6204650.1|GH28	ODP-AF04-102	GH	GH28	Strep. salivarius
contig_1_121	AEJ53294.1|GH73	ODP-AF04-102	GH	GH73	Strep. salivarius
contig_1_162	BEI59196.1|GH130_1	ODP-AF04-102	GH	GH130_1	Strep. salivarius
contig_1_174	SQF75762.1|GH23	ODP-AF04-102	GH	GH23	Strep. salivarius
contig_1_176	AMJ20543.1|GH13_11	ODP-AF04-102	GH	GH13_11	Strep. salivarius
contig_1_180	AGL64700.2|GH23	ODP-AF04-102	GH	GH23	Strep. salivarius
contig_1_222	QGU82405.1|CBM66|GH32	ODP-AF04-102	CBM	CBM66	Strep. salivarius
contig_1_222	QGU82405.1|CBM66|GH32	ODP-AF04-102	GH	GH32	Strep. salivarius
contig_2_32	WAO96723.1|GH0	ODP-AF04-102	GH	GH0	Strep. salivarius
contig_2_43	AGL63717.2|GT4	ODP-AF04-102	GT	GT4	Strep. salivarius
contig_2_61	CCB94001.1|GH1	ODP-AF04-102	GH	GH1	Strep. salivarius
contig_2_67	AIY21730.1|GH1	ODP-AF04-102	GH	GH1	Strep. salivarius
contig_2_170	AOG60880.1|GH32	ODP-AF04-102	GH	GH32	Strep. salivarius
contig_2_171	QEM31996.1|GH32	ODP-AF04-102	GH	GH32	Strep. salivarius
contig_2_190	CCO11994.2|GT4	ODP-AF04-102	GT	GT4	Strep. salivarius
contig_2_209	AEJ52649.1|CBM50	ODP-AF04-102	CBM	CBM50	Strep. salivarius
contig_3_4	AAC41412.1|GH70|2.4.1.5	ODP-AF04-102	GH	GH70	Strep. salivarius
contig_3_24	QEM33005.1|GH70	ODP-AF04-102	GH	GH70	Strep. salivarius
contig_3_25	AAE35922.1|GH70|2.4.1.5	ODP-AF04-102	GH	GH70	Strep. salivarius
contig_3_27	QMI51308.1|GH70	ODP-AF04-102	GH	GH70	Strep. salivarius
contig_3_50	QEM32976.1|GH13_31	ODP-AF04-102	GH	GH13_31	Strep. salivarius
contig_3_54	ADN17640.1|GT2	ODP-AF04-102	GT	GT2	Strep. salivarius
contig_3_56	AUH38424.1|GH42	ODP-AF04-102	GH	GH42	Strep. salivarius
contig_3_57	SQF75631.1|GH2	ODP-AF04-102	GH	GH2	Strep. salivarius
contig_3_71	CCO11681.2|GH25	ODP-AF04-102	GH	GH25	Strep. salivarius
contig_4_1	CCO11054.2|CBM50	ODP-AF04-102	CBM	CBM50	Strep. salivarius
contig_4_32	QEM33225.1|GT4	ODP-AF04-102	GT	GT4	Strep. salivarius
contig_4_33	QEM33224.1|GT8	ODP-AF04-102	GT	GT8	Strep. salivarius
contig_4_46	BBF72686.1|GT2	ODP-AF04-102	GT	GT2	Strep. salivarius
contig_4_60	QGU82116.1|CBM50	ODP-AF04-102	CBM	CBM50	Strep. salivarius
contig_4_66	CCO12633.2|GH84	ODP-AF04-102	GH	GH84	Strep. salivarius
contig_4_75	QUI22575.1|CBM50	ODP-AF04-102	CBM	CBM50	Strep. salivarius
contig_4_107	CAG7911095.1|GH5_11	ODP-AF04-102	GH	GH5_11	Strep. salivarius
contig_5_44	CCO11632.2|GH3	ODP-AF04-102	GH	GH3	Strep. salivarius
contig_5_57	ARI60278.1|GH70|2.4.1.5	ODP-AF04-102	GH	GH70	Strep. salivarius
contig_5_58	QGU78753.1|GH70	ODP-AF04-102	GH	GH70	Strep. salivarius
contig_5_59	QEM32528.1|GH70	ODP-AF04-102	GH	GH70	Strep. salivarius
contig_5_60	QEM32527.1|GT2	ODP-AF04-102	GT	GT2	Strep. salivarius
contig_5_77	BBD21966.1|GT2	ODP-AF04-102	GT	GT2	Strep. salivarius
contig_5_87	QAY63367.1|GT2	ODP-AF04-102	GT	GT2	Strep. salivarius
contig_6_1	SQF74993.1|GH66	ODP-AF04-102	GH	GH66	Strep. salivarius
contig_6_53	AGL64353.2|CBM50|GH25	ODP-AF04-102	CBM	CBM50	Strep. salivarius
contig_6_53	AGL64353.2|CBM50|GH25	ODP-AF04-102	GH	GH25	Strep. salivarius
contig_6_57	QYO62262.1|GH13	ODP-AF04-102	GH	GH13	Strep. salivarius
contig_6_62	QGU77907.1|GT51	ODP-AF04-102	GT	GT51	Strep. salivarius
contig_6_69	CUS04921.2|GT4	ODP-AF04-102	GT	GT4	Strep. salivarius
contig_6_84	QEM33366.1|GT51	ODP-AF04-102	GT	GT51	Strep. salivarius
contig_7_48	QEM32424.1|CBM50	ODP-AF04-102	CBM	CBM50	Strep. salivarius
contig_7_53	QGU82918.1|GH25	ODP-AF04-102	GH	GH25	Strep. salivarius
contig_7_71	SQF76210.1|GH87	ODP-AF04-102	GH	GH87	Strep. salivarius
contig_7_93	ARI60345.1|GT28	ODP-AF04-102	GT	GT28	Strep. salivarius
contig_8_10	SQF75520.1|GT35	ODP-AF04-102	GT	GT35	Strep. salivarius
contig_8_11	QEM33065.1|GT5	ODP-AF04-102	GT	GT5	Strep. salivarius
contig_8_13	BBM21727.1|GH13_9	ODP-AF04-102	GH	GH13_9	Strep. salivarius
contig_8_14	QGU78229.1|CBM48|GH13_9	ODP-AF04-102	CBM	CBM48	Strep. salivarius
contig_8_14	QGU78229.1|CBM48|GH13_9	ODP-AF04-102	GH	GH13_9	Strep. salivarius
contig_8_15	QEM33069.1|CBM41|CBM48|GH13_14	ODP-AF04-102	CBM	CBM41	Strep. salivarius
contig_8_15	QEM33069.1|CBM41|CBM48|GH13_14	ODP-AF04-102	CBM	CBM48	Strep. salivarius
contig_8_15	QEM33069.1|CBM41|CBM48|GH13_14	ODP-AF04-102	GH	GH13_14	Strep. salivarius
contig_8_16	AGL63871.2|GT2	ODP-AF04-102	GT	GT2	Strep. salivarius
contig_8_28	ALR09732.2|GH92	ODP-AF04-102	GH	GH92	Strep. salivarius
contig_8_54	SQF25488.1|GT0	ODP-AF04-102	GT	GT0	Strep. salivarius
contig_8_57	CCB92856.1|GT2	ODP-AF04-102	GT	GT2	Strep. salivarius
contig_8_58	CCB92855.1|GT4	ODP-AF04-102	GT	GT4	Strep. salivarius
contig_8_60	QEM33113.1|GT4	ODP-AF04-102	GT	GT4	Strep. salivarius
contig_8_62	CCB92851.1|GT2|GT4	ODP-AF04-102	GT	GT2	Strep. salivarius
contig_8_62	CCB92851.1|GT2|GT4	ODP-AF04-102	GT	GT4	Strep. salivarius
contig_9_35	CAN80640.1|GT47	ODP-AF04-102	GT	GT47	Strep. salivarius
contig_9_55	ALR08738.2|GT83	ODP-AF04-102	GT	GT83	Strep. salivarius
contig_9_85	QMI51832.1|GH73	ODP-AF04-102	GH	GH73	Strep. salivarius
contig_9_110	AEJ52449.1|GH23	ODP-AF04-102	GH	GH23	Strep. salivarius
contig_9_111	SQF76967.1|CBM50	ODP-AF04-102	CBM	CBM50	Strep. salivarius
contig_10_41	QXF33454.1|GH13_3	ODP-AF04-102	GH	GH13_3	Strep. salivarius
contig_10_46	ARI60575.1|CE9	ODP-AF04-102	CE	CE9	Strep. salivarius
contig_10_51	ARI58749.1|GH73	ODP-AF04-102	GH	GH73	Strep. salivarius
contig_10_65	CAD7245033.1|GT58	ODP-AF04-102	GT	GT58	Strep. salivarius
contig_11_1	SQF76278.1|GT2|GT8	ODP-AF04-102	GT	GT2	Strep. salivarius
contig_11_1	SQF76278.1|GT2|GT8	ODP-AF04-102	GT	GT8	Strep. salivarius
contig_11_37	CCO09729.2|GH1	ODP-AF04-102	GH	GH1	Strep. salivarius
contig_11_48	CCO12112.2|GH13_31	ODP-AF04-102	GH	GH13_31	Strep. salivarius
contig_11_78	AGL63717.2|GT4	ODP-AF04-102	GT	GT4	Strep. salivarius
contig_12_21	CAI32748.2|GT4	ODP-AF04-102	GT	GT4	Strep. salivarius
contig_12_54	CCO12868.2|GH1	ODP-AF04-102	GH	GH1	Strep. salivarius
contig_12_56	ARC23275.1|GT51	ODP-AF04-102	GT	GT51	Strep. salivarius
contig_12_61	WAO96723.1|GH0	ODP-AF04-102	GH	GH0	Strep. salivarius
contig_12_70	SQF76856.1|GH13_29	ODP-AF04-102	GH	GH13_29	Strep. salivarius
contig_12_71	QCH95999.1|GH13_29	ODP-AF04-102	GH	GH13_29	Strep. salivarius
contig_13_69	AGL64345.2|GT2	ODP-AF04-102	GT	GT2	Strep. salivarius
contig_13_74	QBQ55251.1|CBM50	ODP-AF04-102	CBM	CBM50	Strep. salivarius
contig_14_12	SQF76383.1|GT4	ODP-AF04-102	GT	GT4	Strep. salivarius
contig_14_13	ARI57675.1|GT4	ODP-AF04-102	GT	GT4	Strep. salivarius
contig_14_14	CAN65674.1|GH28	ODP-AF04-102	GH	GH28	Strep. salivarius
contig_15_7	ARI59740.1|GT2|GT8	ODP-AF04-102	GT	GT2	Strep. salivarius
contig_15_7	ARI59740.1|GT2|GT8	ODP-AF04-102	GT	GT8	Strep. salivarius
contig_15_8	QEM33046.1|GT8	ODP-AF04-102	GT	GT8	Strep. salivarius
contig_15_9	SQF75538.1|GT8	ODP-AF04-102	GT	GT8	Strep. salivarius
contig_15_10	AEJ53043.1|GT4	ODP-AF04-102	GT	GT4	Strep. salivarius
contig_15_11	SQF75540.1|GT8	ODP-AF04-102	GT	GT8	Strep. salivarius
contig_15_12	CCB92926.1|GT113	ODP-AF04-102	GT	GT113	Strep. salivarius
contig_15_13	QGU82276.1|GT8	ODP-AF04-102	GT	GT8	Strep. salivarius
contig_15_14	CCB92928.1|GT2	ODP-AF04-102	GT	GT2	Strep. salivarius
contig_15_15	QEM33039.1|GT101|GT8	ODP-AF04-102	GT	GT101	Strep. salivarius
contig_15_15	QEM33039.1|GT101|GT8	ODP-AF04-102	GT	GT8	Strep. salivarius
contig_15_16	ARI59747.1|GT8	ODP-AF04-102	GT	GT8	Strep. salivarius
contig_16_9	ARI59334.1|GH73	ODP-AF04-102	GH	GH73	Strep. salivarius
contig_16_28	CAE6076421.1|GH27	ODP-AF04-102	GH	GH27	Strep. salivarius
contig_16_32	CAD7252417.1|GH13	ODP-AF04-102	GH	GH13	Strep. salivarius
contig_16_35	AGL63717.2|GT4	ODP-AF04-102	GT	GT4	Strep. salivarius
contig_17_6	CUS05224.2|CE14	ODP-AF04-102	CE	CE14	Strep. salivarius
contig_17_22	QYU66396.1|GH13_23	ODP-AF04-102	GH	GH13_23	Strep. salivarius
contig_17_24	CCO12102.2|GH13_31	ODP-AF04-102	GH	GH13_31	Strep. salivarius
contig_18_5	AGL63702.2|GT4	ODP-AF04-102	GT	GT4	Strep. salivarius
contig_18_12	AIY21653.1|CE4	ODP-AF04-102	CE	CE4	Strep. salivarius
contig_19_18	ARI58783.1|GH13_5	ODP-AF04-102	GH	GH13_5	Strep. salivarius
contig_20_19	AEJ52962.1|GT2	ODP-AF04-102	GT	GT2	Strep. salivarius
contig_20_23	AEJ52966.1|GT2	ODP-AF04-102	GT	GT2	Strep. salivarius
contig_20_24	QBS00312.1|GT2	ODP-AF04-102	GT	GT2	Strep. salivarius
contig_20_26	AEJ52969.1|GT2	ODP-AF04-102	GT	GT2	Strep. salivarius
contig_21_1	QGU78609.1|GH25	ODP-AF04-102	GH	GH25	Strep. salivarius
contig_21_18	QEM32654.1|GH1	ODP-AF04-102	GH	GH1	Strep. salivarius
contig_22_2	AEJ53414.1|GT35	ODP-AF04-102	GT	GT35	Strep. salivarius
contig_22_3	QGU82617.1|GH77	ODP-AF04-102	GH	GH77	Strep. salivarius
contig_22_18	QEM32671.1|CBM41|CBM48|GH13_12	ODP-AF04-102	CBM	CBM41	Strep. salivarius
contig_22_18	QEM32671.1|CBM41|CBM48|GH13_12	ODP-AF04-102	CBM	CBM48	Strep. salivarius
contig_22_18	QEM32671.1|CBM41|CBM48|GH13_12	ODP-AF04-102	GH	GH13_12	Strep. salivarius
contig_22_19	AEJ53493.1|GH73	ODP-AF04-102	GH	GH73	Strep. salivarius
contig_23_13	QBQ55251.1|CBM50	ODP-AF04-102	CBM	CBM50	Strep. salivarius
contig_23_24	ARI60189.1|GH73	ODP-AF04-102	GH	GH73	Strep. salivarius
contig_24_6	QGU82661.1|GT26	ODP-AF04-102	GT	GT26	Strep. salivarius
contig_24_8	QEM32644.1|GT2	ODP-AF04-102	GT	GT2	Strep. salivarius
contig_24_9	QEM32645.1|GT4	ODP-AF04-102	GT	GT4	Strep. salivarius
contig_24_11	QEM32646.1|GT2	ODP-AF04-102	GT	GT2	Strep. salivarius
contig_24_12	QTF54836.1|GT0	ODP-AF04-102	GT	GT0	Strep. salivarius
contig_26_10	CCO10293.2|CBM50	ODP-AF04-102	CBM	CBM50	Strep. salivarius
contig_26_16	QEM33273.1|GH68	ODP-AF04-102	GH	GH68	Strep. salivarius
contig_26_17	QEM33274.1|GH32	ODP-AF04-102	GH	GH32	Strep. salivarius
contig_28_4	WJM08831.1|CBM50	ODP-AF04-102	CBM	CBM50	Strep. salivarius
contig_29_2	CAD7226128.1|GH38	ODP-AF04-102	GH	GH38	Strep. salivarius
contig_31_5	CCB93441.1|GH8	ODP-AF04-102	GH	GH8	Strep. salivarius
contig_31_6	QEM32588.1|GT2	ODP-AF04-102	GT	GT2	Strep. salivarius
contig_31_9	WEA13229.1|GT0	ODP-AF04-102	GT	GT0	Strep. salivarius
contig_32_1	ARI60189.1|GH73	ODP-AF04-102	GH	GH73	Strep. salivarius
contig_51_1	QGU78609.1|GH25	ODP-AF04-102	GH	GH25	Strep. salivarius
contig_1_10	QEM32684.1|GH77	ODP-AF04-103	GH	GH77	Strep. salivarius
contig_1_11	QKH69755.1|GT35	ODP-AF04-103	GT	GT35	Strep. salivarius
contig_1_57	AGL64020.2|AA10	ODP-AF04-103	AA	AA10	Strep. salivarius
contig_1_95	CAE6204650.1|GH28	ODP-AF04-103	GH	GH28	Strep. salivarius
contig_1_148	CAI32748.2|GT4	ODP-AF04-103	GT	GT4	Strep. salivarius
contig_1_181	CCO12868.2|GH1	ODP-AF04-103	GH	GH1	Strep. salivarius
contig_1_183	CCB94255.1|GT51	ODP-AF04-103	GT	GT51	Strep. salivarius
contig_2_10	CCO10293.2|CBM50	ODP-AF04-103	CBM	CBM50	Strep. salivarius
contig_2_16	QEM33273.1|GH68	ODP-AF04-103	GH	GH68	Strep. salivarius
contig_2_17	ARI59518.1|GH32	ODP-AF04-103	GH	GH32	Strep. salivarius
contig_2_20	QBQ55251.1|CBM50	ODP-AF04-103	CBM	CBM50	Strep. salivarius
contig_2_25	AGL64345.2|GT2	ODP-AF04-103	GT	GT2	Strep. salivarius
contig_2_115	QEM33366.1|GT51	ODP-AF04-103	GT	GT51	Strep. salivarius
contig_2_130	CUS04921.2|GT4	ODP-AF04-103	GT	GT4	Strep. salivarius
contig_2_137	VED87219.1|GT51	ODP-AF04-103	GT	GT51	Strep. salivarius
contig_2_142	QYO62262.1|GH13	ODP-AF04-103	GH	GH13	Strep. salivarius
contig_2_146	AGL64353.2|CBM50|GH25	ODP-AF04-103	CBM	CBM50	Strep. salivarius
contig_2_146	AGL64353.2|CBM50|GH25	ODP-AF04-103	GH	GH25	Strep. salivarius
contig_3_10	QEM33064.1|GT35	ODP-AF04-103	GT	GT35	Strep. salivarius
contig_3_11	ARI59723.1|GT5	ODP-AF04-103	GT	GT5	Strep. salivarius
contig_3_13	BBM21727.1|GH13_9	ODP-AF04-103	GH	GH13_9	Strep. salivarius
contig_3_14	QGU78229.1|CBM48|GH13_9	ODP-AF04-103	CBM	CBM48	Strep. salivarius
contig_3_14	QGU78229.1|CBM48|GH13_9	ODP-AF04-103	GH	GH13_9	Strep. salivarius
contig_3_15	QEM33069.1|CBM41|CBM48|GH13_14	ODP-AF04-103	CBM	CBM41	Strep. salivarius
contig_3_15	QEM33069.1|CBM41|CBM48|GH13_14	ODP-AF04-103	CBM	CBM48	Strep. salivarius
contig_3_15	QEM33069.1|CBM41|CBM48|GH13_14	ODP-AF04-103	GH	GH13_14	Strep. salivarius
contig_3_16	AGL63871.2|GT2	ODP-AF04-103	GT	GT2	Strep. salivarius
contig_3_28	ALR09732.2|GH92	ODP-AF04-103	GH	GH92	Strep. salivarius
contig_3_56	QGU82211.1|GT2	ODP-AF04-103	GT	GT2	Strep. salivarius
contig_3_57	SQF25488.1|GT0	ODP-AF04-103	GT	GT0	Strep. salivarius
contig_3_58	QGU78188.1|GT2	ODP-AF04-103	GT	GT2	Strep. salivarius
contig_3_61	AMB83189.1|GT2	ODP-AF04-103	GT	GT2	Strep. salivarius
contig_3_62	AMB83190.1|GT4	ODP-AF04-103	GT	GT4	Strep. salivarius
contig_3_64	QGU78182.1|GT2	ODP-AF04-103	GT	GT2	Strep. salivarius
contig_3_97	CAG7911095.1|GH5_11	ODP-AF04-103	GH	GH5_11	Strep. salivarius
contig_4_12	QEM32801.1|GH73	ODP-AF04-103	GH	GH73	Strep. salivarius
contig_4_52	BEI59196.1|GH130_1	ODP-AF04-103	GH	GH130_1	Strep. salivarius
contig_4_64	QKH69912.1|GH23	ODP-AF04-103	GH	GH23	Strep. salivarius
contig_4_66	AMJ20543.1|GH13_11	ODP-AF04-103	GH	GH13_11	Strep. salivarius
contig_4_69	AGL64700.2|GH23	ODP-AF04-103	GH	GH23	Strep. salivarius
contig_5_6	AGL63717.2|GT4	ODP-AF04-103	GT	GT4	Strep. salivarius
contig_5_17	WAO96723.1|GH0	ODP-AF04-103	GH	GH0	Strep. salivarius
contig_5_56	AGL63702.2|GT4	ODP-AF04-103	GT	GT4	Strep. salivarius
contig_5_65	ARC34731.1|CE4	ODP-AF04-103	CE	CE4	Strep. salivarius
contig_5_96	UOT91118.1|GH13_5	ODP-AF04-103	GH	GH13_5	Strep. salivarius
contig_6_3	QEM33029.1|GH70	ODP-AF04-103	GH	GH70	Strep. salivarius
contig_6_22	AEJ53086.1|GH70	ODP-AF04-103	GH	GH70	Strep. salivarius
contig_6_23	AAE35922.1|GH70|2.4.1.5	ODP-AF04-103	GH	GH70	Strep. salivarius
contig_6_34	ARI59786.1|GH70	ODP-AF04-103	GH	GH70	Strep. salivarius
contig_7_41	CCO11632.2|GH3	ODP-AF04-103	GH	GH3	Strep. salivarius
contig_7_55	QEM32530.1|GH70	ODP-AF04-103	GH	GH70	Strep. salivarius
contig_7_56	CCB93509.1|GH70	ODP-AF04-103	GH	GH70	Strep. salivarius
contig_7_57	QEM32528.1|GH70	ODP-AF04-103	GH	GH70	Strep. salivarius
contig_7_58	QEM32527.1|GT2	ODP-AF04-103	GT	GT2	Strep. salivarius
contig_7_74	BBD21966.1|GT2	ODP-AF04-103	GT	GT2	Strep. salivarius
contig_8_68	AOG60880.1|GH32	ODP-AF04-103	GH	GH32	Strep. salivarius
contig_8_69	CCB96107.1|GH32	ODP-AF04-103	GH	GH32	Strep. salivarius
contig_9_45	SQF76383.1|GT4	ODP-AF04-103	GT	GT4	Strep. salivarius
contig_9_46	SQF76382.1|GT4	ODP-AF04-103	GT	GT4	Strep. salivarius
contig_9_47	CAN65674.1|GH28	ODP-AF04-103	GH	GH28	Strep. salivarius
contig_10_2	CCB93675.1|GT2|GT8	ODP-AF04-103	GT	GT2	Strep. salivarius
contig_10_2	CCB93675.1|GT2|GT8	ODP-AF04-103	GT	GT8	Strep. salivarius
contig_10_32	CCO09729.2|GH1	ODP-AF04-103	GH	GH1	Strep. salivarius
contig_10_43	CCO12112.2|GH13_31	ODP-AF04-103	GH	GH13_31	Strep. salivarius
contig_11_6	QEM32654.1|GH1	ODP-AF04-103	GH	GH1	Strep. salivarius
contig_11_14	QTF54836.1|GT0	ODP-AF04-103	GT	GT0	Strep. salivarius
contig_11_15	QEM32646.1|GT2	ODP-AF04-103	GT	GT2	Strep. salivarius
contig_11_17	QEM32645.1|GT4	ODP-AF04-103	GT	GT4	Strep. salivarius
contig_11_18	QEM32644.1|GT2	ODP-AF04-103	GT	GT2	Strep. salivarius
contig_11_20	QGU82661.1|GT26	ODP-AF04-103	GT	GT26	Strep. salivarius
contig_11_38	QEM32624.1|GH73	ODP-AF04-103	GH	GH73	Strep. salivarius
contig_11_49	QBQ55251.1|CBM50	ODP-AF04-103	CBM	CBM50	Strep. salivarius
contig_13_35	AIY21730.1|GH1	ODP-AF04-103	GH	GH1	Strep. salivarius
contig_13_41	CCB94001.1|GH1	ODP-AF04-103	GH	GH1	Strep. salivarius
contig_14_2	QGU78819.1|GT28	ODP-AF04-103	GT	GT28	Strep. salivarius
contig_14_24	QEM32444.1|GH87	ODP-AF04-103	GH	GH87	Strep. salivarius
contig_14_38	QEM32429.1|GH25	ODP-AF04-103	GH	GH25	Strep. salivarius
contig_14_43	QEM32424.1|CBM50	ODP-AF04-103	CBM	CBM50	Strep. salivarius
contig_15_39	QAY63367.1|GT2	ODP-AF04-103	GT	GT2	Strep. salivarius
contig_16_8	ALR08738.2|GT83	ODP-AF04-103	GT	GT83	Strep. salivarius
contig_16_37	QMI51832.1|GH73	ODP-AF04-103	GH	GH73	Strep. salivarius
contig_17_4	BBF72686.1|GT2	ODP-AF04-103	GT	GT2	Strep. salivarius
contig_17_17	QEM33224.1|GT8	ODP-AF04-103	GT	GT8	Strep. salivarius
contig_17_18	QEM33225.1|GT4	ODP-AF04-103	GT	GT4	Strep. salivarius
contig_17_49	CCO11054.2|CBM50	ODP-AF04-103	CBM	CBM50	Strep. salivarius
contig_18_8	ARI59740.1|GT2|GT8	ODP-AF04-103	GT	GT2	Strep. salivarius
contig_18_8	ARI59740.1|GT2|GT8	ODP-AF04-103	GT	GT8	Strep. salivarius
contig_18_9	QEM33046.1|GT8	ODP-AF04-103	GT	GT8	Strep. salivarius
contig_18_10	AEJ53042.1|GT8	ODP-AF04-103	GT	GT8	Strep. salivarius
contig_18_11	AEJ53043.1|GT4	ODP-AF04-103	GT	GT4	Strep. salivarius
contig_18_12	SQF75540.1|GT8	ODP-AF04-103	GT	GT8	Strep. salivarius
contig_18_13	QGU82275.1|GT113	ODP-AF04-103	GT	GT113	Strep. salivarius
contig_18_14	SQF75542.1|GT8	ODP-AF04-103	GT	GT8	Strep. salivarius
contig_18_15	QEM33040.1|GT2	ODP-AF04-103	GT	GT2	Strep. salivarius
contig_18_16	QEM33039.1|GT101|GT8	ODP-AF04-103	GT	GT101	Strep. salivarius
contig_18_16	QEM33039.1|GT101|GT8	ODP-AF04-103	GT	GT8	Strep. salivarius
contig_18_17	AEJ53050.1|GT8	ODP-AF04-103	GT	GT8	Strep. salivarius
contig_19_7	CUS05224.2|CE14	ODP-AF04-103	CE	CE14	Strep. salivarius
contig_19_26	QYU66396.1|GH13_23	ODP-AF04-103	GH	GH13_23	Strep. salivarius
contig_19_28	CCO12102.2|GH13_31	ODP-AF04-103	GH	GH13_31	Strep. salivarius
contig_20_23	CAE6076421.1|GH27	ODP-AF04-103	GH	GH27	Strep. salivarius
contig_20_27	CAD7252417.1|GH13	ODP-AF04-103	GH	GH13	Strep. salivarius
contig_20_30	AGL63717.2|GT4	ODP-AF04-103	GT	GT4	Strep. salivarius
contig_21_19	ARC23391.1|GH23	ODP-AF04-103	GH	GH23	Strep. salivarius
contig_21_20	AMB83600.1|CBM50	ODP-AF04-103	CBM	CBM50	Strep. salivarius
contig_22_6	QUI22575.1|CBM50	ODP-AF04-103	CBM	CBM50	Strep. salivarius
contig_22_15	CCO12633.2|GH84	ODP-AF04-103	GH	GH84	Strep. salivarius
contig_22_21	QGU82116.1|CBM50	ODP-AF04-103	CBM	CBM50	Strep. salivarius
contig_23_14	QEM31908.1|CBM50	ODP-AF04-103	CBM	CBM50	Strep. salivarius
contig_23_21	CAD7226128.1|GH38	ODP-AF04-103	GH	GH38	Strep. salivarius
contig_25_9	WJM08831.1|CBM50	ODP-AF04-103	CBM	CBM50	Strep. salivarius
contig_25_14	QGU81881.1|GH66	ODP-AF04-103	GH	GH66	Strep. salivarius
contig_26_18	AEJ53119.1|GH2	ODP-AF04-103	GH	GH2	Strep. salivarius
contig_26_19	AUH38424.1|GH42	ODP-AF04-103	GH	GH42	Strep. salivarius
contig_26_21	ADN17640.1|GT2	ODP-AF04-103	GT	GT2	Strep. salivarius
contig_26_25	CCB93012.1|GH13_31	ODP-AF04-103	GH	GH13_31	Strep. salivarius
contig_27_6	ALR80175.1|CBM66|GH32	ODP-AF04-103	CBM	CBM66	Strep. salivarius
contig_27_6	ALR80175.1|CBM66|GH32	ODP-AF04-103	GH	GH32	Strep. salivarius
contig_28_35	CAN80640.1|GT47	ODP-AF04-103	GT	GT47	Strep. salivarius
contig_29_8	CCB94270.1|GH13_29	ODP-AF04-103	GH	GH13_29	Strep. salivarius
contig_29_9	QMI51793.1|GH13_29	ODP-AF04-103	GH	GH13_29	Strep. salivarius
contig_29_18	WAO96723.1|GH0	ODP-AF04-103	GH	GH0	Strep. salivarius
contig_30_7	CAD7245033.1|GT58	ODP-AF04-103	GT	GT58	Strep. salivarius
contig_31_3	QXF33454.1|GH13_3	ODP-AF04-103	GH	GH13_3	Strep. salivarius
contig_31_8	QEM32220.1|CE9	ODP-AF04-103	CE	CE9	Strep. salivarius
contig_31_13	ARI58749.1|GH73	ODP-AF04-103	GH	GH73	Strep. salivarius
contig_32_6	CCO11994.2|GT4	ODP-AF04-103	GT	GT4	Strep. salivarius
contig_33_14	AIY20374.1|GH73	ODP-AF04-103	GH	GH73	Strep. salivarius
contig_36_3	AGL63717.2|GT4	ODP-AF04-103	GT	GT4	Strep. salivarius
contig_37_2	QGU78609.1|GH25	ODP-AF04-103	GH	GH25	Strep. salivarius
contig_39_5	CCB93441.1|GH8	ODP-AF04-103	GH	GH8	Strep. salivarius
contig_39_6	QEM32588.1|GT2	ODP-AF04-103	GT	GT2	Strep. salivarius
contig_39_9	WEA13229.1|GT0	ODP-AF04-103	GT	GT0	Strep. salivarius
contig_41_2	QGU78608.1|CBM41|CBM48|GH13_12	ODP-AF04-103	CBM	CBM41	Strep. salivarius
contig_41_2	QGU78608.1|CBM41|CBM48|GH13_12	ODP-AF04-103	CBM	CBM48	Strep. salivarius
contig_41_2	QGU78608.1|CBM41|CBM48|GH13_12	ODP-AF04-103	GH	GH13_12	Strep. salivarius
contig_41_4	QEM32670.1|GH25	ODP-AF04-103	GH	GH25	Strep. salivarius
contig_1_2	QGU82405.1|CBM66|GH32	ODP-AF04-106	CBM	CBM66	Strep. salivarius
contig_1_2	QGU82405.1|CBM66|GH32	ODP-AF04-106	GH	GH32	Strep. salivarius
contig_1_44	AGL64700.2|GH23	ODP-AF04-106	GH	GH23	Strep. salivarius
contig_1_48	AMJ20543.1|GH13_11	ODP-AF04-106	GH	GH13_11	Strep. salivarius
contig_1_50	SQF75762.1|GH23	ODP-AF04-106	GH	GH23	Strep. salivarius
contig_1_62	BEI59196.1|GH130_1	ODP-AF04-106	GH	GH130_1	Strep. salivarius
contig_1_103	AEJ53294.1|GH73	ODP-AF04-106	GH	GH73	Strep. salivarius
contig_1_148	CAE6204650.1|GH28	ODP-AF04-106	GH	GH28	Strep. salivarius
contig_1_176	AGL64020.2|AA10	ODP-AF04-106	AA	AA10	Strep. salivarius
contig_2_6	AEJ52649.1|CBM50	ODP-AF04-106	CBM	CBM50	Strep. salivarius
contig_2_25	CCO11994.2|GT4	ODP-AF04-106	GT	GT4	Strep. salivarius
contig_2_44	QEM31996.1|GH32	ODP-AF04-106	GH	GH32	Strep. salivarius
contig_2_45	AOG60880.1|GH32	ODP-AF04-106	GH	GH32	Strep. salivarius
contig_2_147	AIY21730.1|GH1	ODP-AF04-106	GH	GH1	Strep. salivarius
contig_2_153	CCB94001.1|GH1	ODP-AF04-106	GH	GH1	Strep. salivarius
contig_2_171	AGL63717.2|GT4	ODP-AF04-106	GT	GT4	Strep. salivarius
contig_2_182	WAO96723.1|GH0	ODP-AF04-106	GH	GH0	Strep. salivarius
contig_3_65	CCO11681.2|GH25	ODP-AF04-106	GH	GH25	Strep. salivarius
contig_3_79	SQF75631.1|GH2	ODP-AF04-106	GH	GH2	Strep. salivarius
contig_3_80	AUH38424.1|GH42	ODP-AF04-106	GH	GH42	Strep. salivarius
contig_3_82	ADN17640.1|GT2	ODP-AF04-106	GT	GT2	Strep. salivarius
contig_3_86	QEM32976.1|GH13_31	ODP-AF04-106	GH	GH13_31	Strep. salivarius
contig_3_109	QMI51308.1|GH70	ODP-AF04-106	GH	GH70	Strep. salivarius
contig_3_111	AAE35922.1|GH70|2.4.1.5	ODP-AF04-106	GH	GH70	Strep. salivarius
contig_3_112	QEM33005.1|GH70	ODP-AF04-106	GH	GH70	Strep. salivarius
contig_3_132	AAC41412.1|GH70|2.4.1.5	ODP-AF04-106	GH	GH70	Strep. salivarius
contig_4_24	CAG7911095.1|GH5_11	ODP-AF04-106	GH	GH5_11	Strep. salivarius
contig_4_56	QUI22575.1|CBM50	ODP-AF04-106	CBM	CBM50	Strep. salivarius
contig_4_65	CCO12633.2|GH84	ODP-AF04-106	GH	GH84	Strep. salivarius
contig_4_71	QGU82116.1|CBM50	ODP-AF04-106	CBM	CBM50	Strep. salivarius
contig_4_85	BBF72686.1|GT2	ODP-AF04-106	GT	GT2	Strep. salivarius
contig_4_98	QEM33224.1|GT8	ODP-AF04-106	GT	GT8	Strep. salivarius
contig_4_99	QEM33225.1|GT4	ODP-AF04-106	GT	GT4	Strep. salivarius
contig_4_130	CCO11054.2|CBM50	ODP-AF04-106	CBM	CBM50	Strep. salivarius
contig_5_1	SQF76278.1|GT2|GT8	ODP-AF04-106	GT	GT2	Strep. salivarius
contig_5_1	SQF76278.1|GT2|GT8	ODP-AF04-106	GT	GT8	Strep. salivarius
contig_5_37	CCO09729.2|GH1	ODP-AF04-106	GH	GH1	Strep. salivarius
contig_5_48	CCO12112.2|GH13_31	ODP-AF04-106	GH	GH13_31	Strep. salivarius
contig_5_78	AGL63717.2|GT4	ODP-AF04-106	GT	GT4	Strep. salivarius
contig_5_109	CAN65674.1|GH28	ODP-AF04-106	GH	GH28	Strep. salivarius
contig_5_110	ARI57675.1|GT4	ODP-AF04-106	GT	GT4	Strep. salivarius
contig_5_111	SQF76383.1|GT4	ODP-AF04-106	GT	GT4	Strep. salivarius
contig_6_44	CCO11632.2|GH3	ODP-AF04-106	GH	GH3	Strep. salivarius
contig_6_57	ARI60278.1|GH70|2.4.1.5	ODP-AF04-106	GH	GH70	Strep. salivarius
contig_6_58	QGU78753.1|GH70	ODP-AF04-106	GH	GH70	Strep. salivarius
contig_6_59	QEM32528.1|GH70	ODP-AF04-106	GH	GH70	Strep. salivarius
contig_6_60	QEM32527.1|GT2	ODP-AF04-106	GT	GT2	Strep. salivarius
contig_6_77	BBD21966.1|GT2	ODP-AF04-106	GT	GT2	Strep. salivarius
contig_6_87	QAY63367.1|GT2	ODP-AF04-106	GT	GT2	Strep. salivarius
contig_7_12	QEM33366.1|GT51	ODP-AF04-106	GT	GT51	Strep. salivarius
contig_7_27	CUS04921.2|GT4	ODP-AF04-106	GT	GT4	Strep. salivarius
contig_7_34	QGU77907.1|GT51	ODP-AF04-106	GT	GT51	Strep. salivarius
contig_7_39	QYO62262.1|GH13	ODP-AF04-106	GH	GH13	Strep. salivarius
contig_7_43	AGL64353.2|CBM50|GH25	ODP-AF04-106	CBM	CBM50	Strep. salivarius
contig_7_43	AGL64353.2|CBM50|GH25	ODP-AF04-106	GH	GH25	Strep. salivarius
contig_7_94	SQF74993.1|GH66	ODP-AF04-106	GH	GH66	Strep. salivarius
contig_8_10	ARI60345.1|GT28	ODP-AF04-106	GT	GT28	Strep. salivarius
contig_8_32	SQF76210.1|GH87	ODP-AF04-106	GH	GH87	Strep. salivarius
contig_8_50	QGU82918.1|GH25	ODP-AF04-106	GH	GH25	Strep. salivarius
contig_8_55	QEM32424.1|CBM50	ODP-AF04-106	CBM	CBM50	Strep. salivarius
contig_9_10	SQF75520.1|GT35	ODP-AF04-106	GT	GT35	Strep. salivarius
contig_9_11	QEM33065.1|GT5	ODP-AF04-106	GT	GT5	Strep. salivarius
contig_9_13	BBM21727.1|GH13_9	ODP-AF04-106	GH	GH13_9	Strep. salivarius
contig_9_14	QGU78229.1|CBM48|GH13_9	ODP-AF04-106	CBM	CBM48	Strep. salivarius
contig_9_14	QGU78229.1|CBM48|GH13_9	ODP-AF04-106	GH	GH13_9	Strep. salivarius
contig_9_15	QEM33069.1|CBM41|CBM48|GH13_14	ODP-AF04-106	CBM	CBM41	Strep. salivarius
contig_9_15	QEM33069.1|CBM41|CBM48|GH13_14	ODP-AF04-106	CBM	CBM48	Strep. salivarius
contig_9_15	QEM33069.1|CBM41|CBM48|GH13_14	ODP-AF04-106	GH	GH13_14	Strep. salivarius
contig_9_16	AGL63871.2|GT2	ODP-AF04-106	GT	GT2	Strep. salivarius
contig_9_28	ALR09732.2|GH92	ODP-AF04-106	GH	GH92	Strep. salivarius
contig_9_54	SQF25488.1|GT0	ODP-AF04-106	GT	GT0	Strep. salivarius
contig_9_57	CCB92856.1|GT2	ODP-AF04-106	GT	GT2	Strep. salivarius
contig_9_58	CCB92855.1|GT4	ODP-AF04-106	GT	GT4	Strep. salivarius
contig_9_60	QEM33113.1|GT4	ODP-AF04-106	GT	GT4	Strep. salivarius
contig_9_62	CCB92851.1|GT2|GT4	ODP-AF04-106	GT	GT2	Strep. salivarius
contig_9_62	CCB92851.1|GT2|GT4	ODP-AF04-106	GT	GT4	Strep. salivarius
contig_10_1	SQF76967.1|CBM50	ODP-AF04-106	CBM	CBM50	Strep. salivarius
contig_10_2	AEJ52449.1|GH23	ODP-AF04-106	GH	GH23	Strep. salivarius
contig_10_27	QMI51832.1|GH73	ODP-AF04-106	GH	GH73	Strep. salivarius
contig_10_57	ALR08738.2|GT83	ODP-AF04-106	GT	GT83	Strep. salivarius
contig_10_77	CAN80640.1|GT47	ODP-AF04-106	GT	GT47	Strep. salivarius
contig_11_41	QXF33454.1|GH13_3	ODP-AF04-106	GH	GH13_3	Strep. salivarius
contig_11_46	ARI60575.1|CE9	ODP-AF04-106	CE	CE9	Strep. salivarius
contig_11_51	ARI58749.1|GH73	ODP-AF04-106	GH	GH73	Strep. salivarius
contig_11_65	CAD7245033.1|GT58	ODP-AF04-106	GT	GT58	Strep. salivarius
contig_12_21	CAI32748.2|GT4	ODP-AF04-106	GT	GT4	Strep. salivarius
contig_12_54	CCO12868.2|GH1	ODP-AF04-106	GH	GH1	Strep. salivarius
contig_12_56	ARC23275.1|GT51	ODP-AF04-106	GT	GT51	Strep. salivarius
contig_12_61	WAO96723.1|GH0	ODP-AF04-106	GH	GH0	Strep. salivarius
contig_12_70	SQF76856.1|GH13_29	ODP-AF04-106	GH	GH13_29	Strep. salivarius
contig_12_71	QCH95999.1|GH13_29	ODP-AF04-106	GH	GH13_29	Strep. salivarius
contig_13_69	AGL64345.2|GT2	ODP-AF04-106	GT	GT2	Strep. salivarius
contig_13_74	QBQ55251.1|CBM50	ODP-AF04-106	CBM	CBM50	Strep. salivarius
contig_14_5	AGL63702.2|GT4	ODP-AF04-106	GT	GT4	Strep. salivarius
contig_14_12	AIY21653.1|CE4	ODP-AF04-106	CE	CE4	Strep. salivarius
contig_14_43	ARI58783.1|GH13_5	ODP-AF04-106	GH	GH13_5	Strep. salivarius
contig_15_2	QEM32654.1|GH1	ODP-AF04-106	GH	GH1	Strep. salivarius
contig_15_19	QGU78609.1|GH25	ODP-AF04-106	GH	GH25	Strep. salivarius
contig_15_20	QEM32670.1|GH25	ODP-AF04-106	GH	GH25	Strep. salivarius
contig_15_21	QEM32671.1|CBM41|CBM48|GH13_12	ODP-AF04-106	CBM	CBM41	Strep. salivarius
contig_15_21	QEM32671.1|CBM41|CBM48|GH13_12	ODP-AF04-106	CBM	CBM48	Strep. salivarius
contig_15_21	QEM32671.1|CBM41|CBM48|GH13_12	ODP-AF04-106	GH	GH13_12	Strep. salivarius
contig_15_36	QGU82617.1|GH77	ODP-AF04-106	GH	GH77	Strep. salivarius
contig_15_37	AEJ53414.1|GT35	ODP-AF04-106	GT	GT35	Strep. salivarius
contig_16_7	ARI59740.1|GT2|GT8	ODP-AF04-106	GT	GT2	Strep. salivarius
contig_16_7	ARI59740.1|GT2|GT8	ODP-AF04-106	GT	GT8	Strep. salivarius
contig_16_8	QEM33046.1|GT8	ODP-AF04-106	GT	GT8	Strep. salivarius
contig_16_9	SQF75538.1|GT8	ODP-AF04-106	GT	GT8	Strep. salivarius
contig_16_10	AEJ53043.1|GT4	ODP-AF04-106	GT	GT4	Strep. salivarius
contig_16_11	SQF75540.1|GT8	ODP-AF04-106	GT	GT8	Strep. salivarius
contig_16_12	CCB92926.1|GT113	ODP-AF04-106	GT	GT113	Strep. salivarius
contig_16_13	QGU82276.1|GT8	ODP-AF04-106	GT	GT8	Strep. salivarius
contig_16_14	CCB92928.1|GT2	ODP-AF04-106	GT	GT2	Strep. salivarius
contig_16_15	QEM33039.1|GT101|GT8	ODP-AF04-106	GT	GT101	Strep. salivarius
contig_16_15	QEM33039.1|GT101|GT8	ODP-AF04-106	GT	GT8	Strep. salivarius
contig_16_16	ARI59747.1|GT8	ODP-AF04-106	GT	GT8	Strep. salivarius
contig_17_9	ARI59334.1|GH73	ODP-AF04-106	GH	GH73	Strep. salivarius
contig_17_28	CAE6076421.1|GH27	ODP-AF04-106	GH	GH27	Strep. salivarius
contig_17_32	CAD7252417.1|GH13	ODP-AF04-106	GH	GH13	Strep. salivarius
contig_17_35	AGL63717.2|GT4	ODP-AF04-106	GT	GT4	Strep. salivarius
contig_18_6	CUS05224.2|CE14	ODP-AF04-106	CE	CE14	Strep. salivarius
contig_18_22	QYU66396.1|GH13_23	ODP-AF04-106	GH	GH13_23	Strep. salivarius
contig_18_24	CCO12102.2|GH13_31	ODP-AF04-106	GH	GH13_31	Strep. salivarius
contig_19_13	QBQ55251.1|CBM50	ODP-AF04-106	CBM	CBM50	Strep. salivarius
contig_19_24	ARI60189.1|GH73	ODP-AF04-106	GH	GH73	Strep. salivarius
contig_20_1	AEJ52969.1|GT2	ODP-AF04-106	GT	GT2	Strep. salivarius
contig_20_3	QBS00312.1|GT2	ODP-AF04-106	GT	GT2	Strep. salivarius
contig_20_4	AEJ52966.1|GT2	ODP-AF04-106	GT	GT2	Strep. salivarius
contig_20_8	AEJ52962.1|GT2	ODP-AF04-106	GT	GT2	Strep. salivarius
contig_21_6	QGU82661.1|GT26	ODP-AF04-106	GT	GT26	Strep. salivarius
contig_21_8	QEM32644.1|GT2	ODP-AF04-106	GT	GT2	Strep. salivarius
contig_21_9	QEM32645.1|GT4	ODP-AF04-106	GT	GT4	Strep. salivarius
contig_21_11	QEM32646.1|GT2	ODP-AF04-106	GT	GT2	Strep. salivarius
contig_21_12	QTF54836.1|GT0	ODP-AF04-106	GT	GT0	Strep. salivarius
contig_23_10	CCO10293.2|CBM50	ODP-AF04-106	CBM	CBM50	Strep. salivarius
contig_23_16	QEM33273.1|GH68	ODP-AF04-106	GH	GH68	Strep. salivarius
contig_23_17	QEM33274.1|GH32	ODP-AF04-106	GH	GH32	Strep. salivarius
contig_25_11	WJM08831.1|CBM50	ODP-AF04-106	CBM	CBM50	Strep. salivarius
contig_26_2	CAD7226128.1|GH38	ODP-AF04-106	GH	GH38	Strep. salivarius
contig_29_5	CCB93441.1|GH8	ODP-AF04-106	GH	GH8	Strep. salivarius
contig_29_6	QEM32588.1|GT2	ODP-AF04-106	GT	GT2	Strep. salivarius
contig_29_9	WEA13229.1|GT0	ODP-AF04-106	GT	GT0	Strep. salivarius
contig_1_2	QGU82405.1|CBM66|GH32	ODP-AF04-107	CBM	CBM66	Strep. salivarius
contig_1_2	QGU82405.1|CBM66|GH32	ODP-AF04-107	GH	GH32	Strep. salivarius
contig_1_44	AGL64700.2|GH23	ODP-AF04-107	GH	GH23	Strep. salivarius
contig_1_48	AMJ20543.1|GH13_11	ODP-AF04-107	GH	GH13_11	Strep. salivarius
contig_1_50	SQF75762.1|GH23	ODP-AF04-107	GH	GH23	Strep. salivarius
contig_1_62	BEI59196.1|GH130_1	ODP-AF04-107	GH	GH130_1	Strep. salivarius
contig_1_103	AEJ53294.1|GH73	ODP-AF04-107	GH	GH73	Strep. salivarius
contig_1_148	CAE6204650.1|GH28	ODP-AF04-107	GH	GH28	Strep. salivarius
contig_1_176	AGL64020.2|AA10	ODP-AF04-107	AA	AA10	Strep. salivarius
contig_1_225	AEJ53414.1|GT35	ODP-AF04-107	GT	GT35	Strep. salivarius
contig_1_226	QGU82617.1|GH77	ODP-AF04-107	GH	GH77	Strep. salivarius
contig_1_241	QEM32671.1|CBM41|CBM48|GH13_12	ODP-AF04-107	CBM	CBM41	Strep. salivarius
contig_1_241	QEM32671.1|CBM41|CBM48|GH13_12	ODP-AF04-107	CBM	CBM48	Strep. salivarius
contig_1_241	QEM32671.1|CBM41|CBM48|GH13_12	ODP-AF04-107	GH	GH13_12	Strep. salivarius
contig_1_242	AEJ53493.1|GH73	ODP-AF04-107	GH	GH73	Strep. salivarius
contig_2_32	WAO96723.1|GH0	ODP-AF04-107	GH	GH0	Strep. salivarius
contig_2_43	AGL63717.2|GT4	ODP-AF04-107	GT	GT4	Strep. salivarius
contig_2_61	CCB94001.1|GH1	ODP-AF04-107	GH	GH1	Strep. salivarius
contig_2_67	AIY21730.1|GH1	ODP-AF04-107	GH	GH1	Strep. salivarius
contig_2_169	AOG60880.1|GH32	ODP-AF04-107	GH	GH32	Strep. salivarius
contig_2_170	QEM31996.1|GH32	ODP-AF04-107	GH	GH32	Strep. salivarius
contig_2_189	CCO11994.2|GT4	ODP-AF04-107	GT	GT4	Strep. salivarius
contig_2_208	AEJ52649.1|CBM50	ODP-AF04-107	CBM	CBM50	Strep. salivarius
contig_3_65	CCO11681.2|GH25	ODP-AF04-107	GH	GH25	Strep. salivarius
contig_3_79	SQF75631.1|GH2	ODP-AF04-107	GH	GH2	Strep. salivarius
contig_3_80	AUH38424.1|GH42	ODP-AF04-107	GH	GH42	Strep. salivarius
contig_3_82	ADN17640.1|GT2	ODP-AF04-107	GT	GT2	Strep. salivarius
contig_3_86	QEM32976.1|GH13_31	ODP-AF04-107	GH	GH13_31	Strep. salivarius
contig_3_109	QMI51308.1|GH70	ODP-AF04-107	GH	GH70	Strep. salivarius
contig_3_111	AAE35922.1|GH70|2.4.1.5	ODP-AF04-107	GH	GH70	Strep. salivarius
contig_3_112	QEM33005.1|GH70	ODP-AF04-107	GH	GH70	Strep. salivarius
contig_3_132	AAC41412.1|GH70|2.4.1.5	ODP-AF04-107	GH	GH70	Strep. salivarius
contig_4_1	CCO11054.2|CBM50	ODP-AF04-107	CBM	CBM50	Strep. salivarius
contig_4_32	QEM33225.1|GT4	ODP-AF04-107	GT	GT4	Strep. salivarius
contig_4_33	QEM33224.1|GT8	ODP-AF04-107	GT	GT8	Strep. salivarius
contig_4_46	BBF72686.1|GT2	ODP-AF04-107	GT	GT2	Strep. salivarius
contig_4_60	QGU82116.1|CBM50	ODP-AF04-107	CBM	CBM50	Strep. salivarius
contig_4_66	CCO12633.2|GH84	ODP-AF04-107	GH	GH84	Strep. salivarius
contig_4_75	QUI22575.1|CBM50	ODP-AF04-107	CBM	CBM50	Strep. salivarius
contig_4_107	CAG7911095.1|GH5_11	ODP-AF04-107	GH	GH5_11	Strep. salivarius
contig_5_44	CCO11632.2|GH3	ODP-AF04-107	GH	GH3	Strep. salivarius
contig_5_57	ARI60278.1|GH70|2.4.1.5	ODP-AF04-107	GH	GH70	Strep. salivarius
contig_5_58	QGU78753.1|GH70	ODP-AF04-107	GH	GH70	Strep. salivarius
contig_5_59	QEM32528.1|GH70	ODP-AF04-107	GH	GH70	Strep. salivarius
contig_5_60	QEM32527.1|GT2	ODP-AF04-107	GT	GT2	Strep. salivarius
contig_5_77	BBD21966.1|GT2	ODP-AF04-107	GT	GT2	Strep. salivarius
contig_5_87	QAY63367.1|GT2	ODP-AF04-107	GT	GT2	Strep. salivarius
contig_6_14	QEM33366.1|GT51	ODP-AF04-107	GT	GT51	Strep. salivarius
contig_6_29	CUS04921.2|GT4	ODP-AF04-107	GT	GT4	Strep. salivarius
contig_6_36	QGU77907.1|GT51	ODP-AF04-107	GT	GT51	Strep. salivarius
contig_6_41	QYO62262.1|GH13	ODP-AF04-107	GH	GH13	Strep. salivarius
contig_6_45	AGL64353.2|CBM50|GH25	ODP-AF04-107	CBM	CBM50	Strep. salivarius
contig_6_45	AGL64353.2|CBM50|GH25	ODP-AF04-107	GH	GH25	Strep. salivarius
contig_6_96	SQF74993.1|GH66	ODP-AF04-107	GH	GH66	Strep. salivarius
contig_7_10	ARI60345.1|GT28	ODP-AF04-107	GT	GT28	Strep. salivarius
contig_7_32	SQF76210.1|GH87	ODP-AF04-107	GH	GH87	Strep. salivarius
contig_7_50	QGU82918.1|GH25	ODP-AF04-107	GH	GH25	Strep. salivarius
contig_7_55	QEM32424.1|CBM50	ODP-AF04-107	CBM	CBM50	Strep. salivarius
contig_8_10	SQF75520.1|GT35	ODP-AF04-107	GT	GT35	Strep. salivarius
contig_8_11	QEM33065.1|GT5	ODP-AF04-107	GT	GT5	Strep. salivarius
contig_8_13	BBM21727.1|GH13_9	ODP-AF04-107	GH	GH13_9	Strep. salivarius
contig_8_14	QGU78229.1|CBM48|GH13_9	ODP-AF04-107	CBM	CBM48	Strep. salivarius
contig_8_14	QGU78229.1|CBM48|GH13_9	ODP-AF04-107	GH	GH13_9	Strep. salivarius
contig_8_15	QEM33069.1|CBM41|CBM48|GH13_14	ODP-AF04-107	CBM	CBM41	Strep. salivarius
contig_8_15	QEM33069.1|CBM41|CBM48|GH13_14	ODP-AF04-107	CBM	CBM48	Strep. salivarius
contig_8_15	QEM33069.1|CBM41|CBM48|GH13_14	ODP-AF04-107	GH	GH13_14	Strep. salivarius
contig_8_16	AGL63871.2|GT2	ODP-AF04-107	GT	GT2	Strep. salivarius
contig_8_28	ALR09732.2|GH92	ODP-AF04-107	GH	GH92	Strep. salivarius
contig_8_54	SQF25488.1|GT0	ODP-AF04-107	GT	GT0	Strep. salivarius
contig_8_57	CCB92856.1|GT2	ODP-AF04-107	GT	GT2	Strep. salivarius
contig_8_58	CCB92855.1|GT4	ODP-AF04-107	GT	GT4	Strep. salivarius
contig_8_60	QEM33113.1|GT4	ODP-AF04-107	GT	GT4	Strep. salivarius
contig_8_62	CCB92851.1|GT2|GT4	ODP-AF04-107	GT	GT2	Strep. salivarius
contig_8_62	CCB92851.1|GT2|GT4	ODP-AF04-107	GT	GT4	Strep. salivarius
contig_9_1	SQF76967.1|CBM50	ODP-AF04-107	CBM	CBM50	Strep. salivarius
contig_9_2	AEJ52449.1|GH23	ODP-AF04-107	GH	GH23	Strep. salivarius
contig_9_27	QMI51832.1|GH73	ODP-AF04-107	GH	GH73	Strep. salivarius
contig_9_57	ALR08738.2|GT83	ODP-AF04-107	GT	GT83	Strep. salivarius
contig_9_77	CAN80640.1|GT47	ODP-AF04-107	GT	GT47	Strep. salivarius
contig_10_41	QXF33454.1|GH13_3	ODP-AF04-107	GH	GH13_3	Strep. salivarius
contig_10_46	ARI60575.1|CE9	ODP-AF04-107	CE	CE9	Strep. salivarius
contig_10_51	ARI58749.1|GH73	ODP-AF04-107	GH	GH73	Strep. salivarius
contig_10_65	CAD7245033.1|GT58	ODP-AF04-107	GT	GT58	Strep. salivarius
contig_11_1	SQF76278.1|GT2|GT8	ODP-AF04-107	GT	GT2	Strep. salivarius
contig_11_1	SQF76278.1|GT2|GT8	ODP-AF04-107	GT	GT8	Strep. salivarius
contig_11_37	CCO09729.2|GH1	ODP-AF04-107	GH	GH1	Strep. salivarius
contig_11_48	CCO12112.2|GH13_31	ODP-AF04-107	GH	GH13_31	Strep. salivarius
contig_11_78	AGL63717.2|GT4	ODP-AF04-107	GT	GT4	Strep. salivarius
contig_12_21	CAI32748.2|GT4	ODP-AF04-107	GT	GT4	Strep. salivarius
contig_12_54	CCO12868.2|GH1	ODP-AF04-107	GH	GH1	Strep. salivarius
contig_12_56	ARC23275.1|GT51	ODP-AF04-107	GT	GT51	Strep. salivarius
contig_12_61	WAO96723.1|GH0	ODP-AF04-107	GH	GH0	Strep. salivarius
contig_12_70	SQF76856.1|GH13_29	ODP-AF04-107	GH	GH13_29	Strep. salivarius
contig_12_71	QCH95999.1|GH13_29	ODP-AF04-107	GH	GH13_29	Strep. salivarius
contig_13_69	AGL64345.2|GT2	ODP-AF04-107	GT	GT2	Strep. salivarius
contig_13_74	QBQ55251.1|CBM50	ODP-AF04-107	CBM	CBM50	Strep. salivarius
contig_14_8	ARI58783.1|GH13_5	ODP-AF04-107	GH	GH13_5	Strep. salivarius
contig_14_39	AIY21653.1|CE4	ODP-AF04-107	CE	CE4	Strep. salivarius
contig_14_46	AGL63702.2|GT4	ODP-AF04-107	GT	GT4	Strep. salivarius
contig_15_9	ARI59747.1|GT8	ODP-AF04-107	GT	GT8	Strep. salivarius
contig_15_10	QEM33039.1|GT101|GT8	ODP-AF04-107	GT	GT101	Strep. salivarius
contig_15_10	QEM33039.1|GT101|GT8	ODP-AF04-107	GT	GT8	Strep. salivarius
contig_15_11	CCB92928.1|GT2	ODP-AF04-107	GT	GT2	Strep. salivarius
contig_15_12	QGU82276.1|GT8	ODP-AF04-107	GT	GT8	Strep. salivarius
contig_15_13	CCB92926.1|GT113	ODP-AF04-107	GT	GT113	Strep. salivarius
contig_15_14	SQF75540.1|GT8	ODP-AF04-107	GT	GT8	Strep. salivarius
contig_15_15	AEJ53043.1|GT4	ODP-AF04-107	GT	GT4	Strep. salivarius
contig_15_16	SQF75538.1|GT8	ODP-AF04-107	GT	GT8	Strep. salivarius
contig_15_17	QEM33046.1|GT8	ODP-AF04-107	GT	GT8	Strep. salivarius
contig_15_18	ARI59740.1|GT2|GT8	ODP-AF04-107	GT	GT2	Strep. salivarius
contig_15_18	ARI59740.1|GT2|GT8	ODP-AF04-107	GT	GT8	Strep. salivarius
contig_16_12	SQF76383.1|GT4	ODP-AF04-107	GT	GT4	Strep. salivarius
contig_16_13	ARI57675.1|GT4	ODP-AF04-107	GT	GT4	Strep. salivarius
contig_16_14	CAN65674.1|GH28	ODP-AF04-107	GH	GH28	Strep. salivarius
contig_17_9	ARI59334.1|GH73	ODP-AF04-107	GH	GH73	Strep. salivarius
contig_17_28	CAE6076421.1|GH27	ODP-AF04-107	GH	GH27	Strep. salivarius
contig_17_32	CAD7252417.1|GH13	ODP-AF04-107	GH	GH13	Strep. salivarius
contig_17_35	AGL63717.2|GT4	ODP-AF04-107	GT	GT4	Strep. salivarius
contig_18_10	CCO12102.2|GH13_31	ODP-AF04-107	GH	GH13_31	Strep. salivarius
contig_18_12	QYU66396.1|GH13_23	ODP-AF04-107	GH	GH13_23	Strep. salivarius
contig_18_28	CUS05224.2|CE14	ODP-AF04-107	CE	CE14	Strep. salivarius
contig_19_13	QBQ55251.1|CBM50	ODP-AF04-107	CBM	CBM50	Strep. salivarius
contig_19_24	ARI60189.1|GH73	ODP-AF04-107	GH	GH73	Strep. salivarius
contig_19_25	ARI60189.1|GH73	ODP-AF04-107	GH	GH73	Strep. salivarius
contig_20_19	AEJ52962.1|GT2	ODP-AF04-107	GT	GT2	Strep. salivarius
contig_20_23	AEJ52966.1|GT2	ODP-AF04-107	GT	GT2	Strep. salivarius
contig_20_24	QBS00312.1|GT2	ODP-AF04-107	GT	GT2	Strep. salivarius
contig_20_26	AEJ52969.1|GT2	ODP-AF04-107	GT	GT2	Strep. salivarius
contig_21_2	QEM32654.1|GH1	ODP-AF04-107	GH	GH1	Strep. salivarius
contig_21_19	QGU78609.1|GH25	ODP-AF04-107	GH	GH25	Strep. salivarius
contig_22_8	QTF54836.1|GT0	ODP-AF04-107	GT	GT0	Strep. salivarius
contig_22_9	QEM32646.1|GT2	ODP-AF04-107	GT	GT2	Strep. salivarius
contig_22_11	QEM32645.1|GT4	ODP-AF04-107	GT	GT4	Strep. salivarius
contig_22_12	QEM32644.1|GT2	ODP-AF04-107	GT	GT2	Strep. salivarius
contig_22_14	QGU82661.1|GT26	ODP-AF04-107	GT	GT26	Strep. salivarius
contig_24_10	CCO10293.2|CBM50	ODP-AF04-107	CBM	CBM50	Strep. salivarius
contig_24_16	QEM33273.1|GH68	ODP-AF04-107	GH	GH68	Strep. salivarius
contig_24_17	QEM33274.1|GH32	ODP-AF04-107	GH	GH32	Strep. salivarius
contig_26_4	WJM08831.1|CBM50	ODP-AF04-107	CBM	CBM50	Strep. salivarius
contig_27_2	CAD7226128.1|GH38	ODP-AF04-107	GH	GH38	Strep. salivarius
contig_29_5	CCB93441.1|GH8	ODP-AF04-107	GH	GH8	Strep. salivarius
contig_29_6	QEM32588.1|GT2	ODP-AF04-107	GT	GT2	Strep. salivarius
contig_29_9	WEA13229.1|GT0	ODP-AF04-107	GT	GT0	Strep. salivarius
contig_41_1	QGU78609.1|GH25	ODP-AF04-107	GH	GH25	Strep. salivarius
contig_1_35	AGL64700.2|GH23	ODP-AF04-108	GH	GH23	Strep. salivarius
contig_1_39	AMJ20543.1|GH13_11	ODP-AF04-108	GH	GH13_11	Strep. salivarius
contig_1_41	SQF75762.1|GH23	ODP-AF04-108	GH	GH23	Strep. salivarius
contig_1_53	BEI59196.1|GH130_1	ODP-AF04-108	GH	GH130_1	Strep. salivarius
contig_1_94	AEJ53294.1|GH73	ODP-AF04-108	GH	GH73	Strep. salivarius
contig_1_139	CAE6204650.1|GH28	ODP-AF04-108	GH	GH28	Strep. salivarius
contig_1_167	AGL64020.2|AA10	ODP-AF04-108	AA	AA10	Strep. salivarius
contig_2_32	WAO96723.1|GH0	ODP-AF04-108	GH	GH0	Strep. salivarius
contig_2_43	AGL63717.2|GT4	ODP-AF04-108	GT	GT4	Strep. salivarius
contig_2_61	CCB94001.1|GH1	ODP-AF04-108	GH	GH1	Strep. salivarius
contig_2_67	AIY21730.1|GH1	ODP-AF04-108	GH	GH1	Strep. salivarius
contig_2_170	AOG60880.1|GH32	ODP-AF04-108	GH	GH32	Strep. salivarius
contig_2_171	QEM31996.1|GH32	ODP-AF04-108	GH	GH32	Strep. salivarius
contig_2_190	CCO11994.2|GT4	ODP-AF04-108	GT	GT4	Strep. salivarius
contig_2_209	AEJ52649.1|CBM50	ODP-AF04-108	CBM	CBM50	Strep. salivarius
contig_3_4	AAC41412.1|GH70|2.4.1.5	ODP-AF04-108	GH	GH70	Strep. salivarius
contig_3_24	QEM33005.1|GH70	ODP-AF04-108	GH	GH70	Strep. salivarius
contig_3_25	AAE35922.1|GH70|2.4.1.5	ODP-AF04-108	GH	GH70	Strep. salivarius
contig_3_27	QMI51308.1|GH70	ODP-AF04-108	GH	GH70	Strep. salivarius
contig_3_50	QEM32976.1|GH13_31	ODP-AF04-108	GH	GH13_31	Strep. salivarius
contig_3_54	ADN17640.1|GT2	ODP-AF04-108	GT	GT2	Strep. salivarius
contig_3_56	AUH38424.1|GH42	ODP-AF04-108	GH	GH42	Strep. salivarius
contig_3_57	SQF75631.1|GH2	ODP-AF04-108	GH	GH2	Strep. salivarius
contig_3_71	CCO11681.2|GH25	ODP-AF04-108	GH	GH25	Strep. salivarius
contig_4_1	CCO11054.2|CBM50	ODP-AF04-108	CBM	CBM50	Strep. salivarius
contig_4_32	QEM33225.1|GT4	ODP-AF04-108	GT	GT4	Strep. salivarius
contig_4_33	QEM33224.1|GT8	ODP-AF04-108	GT	GT8	Strep. salivarius
contig_4_46	BBF72686.1|GT2	ODP-AF04-108	GT	GT2	Strep. salivarius
contig_4_60	QGU82116.1|CBM50	ODP-AF04-108	CBM	CBM50	Strep. salivarius
contig_4_66	CCO12633.2|GH84	ODP-AF04-108	GH	GH84	Strep. salivarius
contig_4_75	QUI22575.1|CBM50	ODP-AF04-108	CBM	CBM50	Strep. salivarius
contig_4_107	CAG7911095.1|GH5_11	ODP-AF04-108	GH	GH5_11	Strep. salivarius
contig_5_44	CCO11632.2|GH3	ODP-AF04-108	GH	GH3	Strep. salivarius
contig_5_57	ARI60278.1|GH70|2.4.1.5	ODP-AF04-108	GH	GH70	Strep. salivarius
contig_5_58	QGU78753.1|GH70	ODP-AF04-108	GH	GH70	Strep. salivarius
contig_5_59	QEM32528.1|GH70	ODP-AF04-108	GH	GH70	Strep. salivarius
contig_5_60	QEM32527.1|GT2	ODP-AF04-108	GT	GT2	Strep. salivarius
contig_5_77	BBD21966.1|GT2	ODP-AF04-108	GT	GT2	Strep. salivarius
contig_5_87	QAY63367.1|GT2	ODP-AF04-108	GT	GT2	Strep. salivarius
contig_6_1	SQF74993.1|GH66	ODP-AF04-108	GH	GH66	Strep. salivarius
contig_6_52	AGL64353.2|CBM50|GH25	ODP-AF04-108	CBM	CBM50	Strep. salivarius
contig_6_52	AGL64353.2|CBM50|GH25	ODP-AF04-108	GH	GH25	Strep. salivarius
contig_6_56	QYO62262.1|GH13	ODP-AF04-108	GH	GH13	Strep. salivarius
contig_6_61	QGU77907.1|GT51	ODP-AF04-108	GT	GT51	Strep. salivarius
contig_6_68	CUS04921.2|GT4	ODP-AF04-108	GT	GT4	Strep. salivarius
contig_6_83	QEM33366.1|GT51	ODP-AF04-108	GT	GT51	Strep. salivarius
contig_7_10	ARI60345.1|GT28	ODP-AF04-108	GT	GT28	Strep. salivarius
contig_7_32	SQF76210.1|GH87	ODP-AF04-108	GH	GH87	Strep. salivarius
contig_7_50	QGU82918.1|GH25	ODP-AF04-108	GH	GH25	Strep. salivarius
contig_7_55	QEM32424.1|CBM50	ODP-AF04-108	CBM	CBM50	Strep. salivarius
contig_8_10	SQF75520.1|GT35	ODP-AF04-108	GT	GT35	Strep. salivarius
contig_8_11	QEM33065.1|GT5	ODP-AF04-108	GT	GT5	Strep. salivarius
contig_8_13	BBM21727.1|GH13_9	ODP-AF04-108	GH	GH13_9	Strep. salivarius
contig_8_14	QGU78229.1|CBM48|GH13_9	ODP-AF04-108	CBM	CBM48	Strep. salivarius
contig_8_14	QGU78229.1|CBM48|GH13_9	ODP-AF04-108	GH	GH13_9	Strep. salivarius
contig_8_15	QEM33069.1|CBM41|CBM48|GH13_14	ODP-AF04-108	CBM	CBM41	Strep. salivarius
contig_8_15	QEM33069.1|CBM41|CBM48|GH13_14	ODP-AF04-108	CBM	CBM48	Strep. salivarius
contig_8_15	QEM33069.1|CBM41|CBM48|GH13_14	ODP-AF04-108	GH	GH13_14	Strep. salivarius
contig_8_16	AGL63871.2|GT2	ODP-AF04-108	GT	GT2	Strep. salivarius
contig_8_28	ALR09732.2|GH92	ODP-AF04-108	GH	GH92	Strep. salivarius
contig_8_54	SQF25488.1|GT0	ODP-AF04-108	GT	GT0	Strep. salivarius
contig_8_57	CCB92856.1|GT2	ODP-AF04-108	GT	GT2	Strep. salivarius
contig_8_58	CCB92855.1|GT4	ODP-AF04-108	GT	GT4	Strep. salivarius
contig_8_60	QEM33113.1|GT4	ODP-AF04-108	GT	GT4	Strep. salivarius
contig_8_62	CCB92851.1|GT2|GT4	ODP-AF04-108	GT	GT2	Strep. salivarius
contig_8_62	CCB92851.1|GT2|GT4	ODP-AF04-108	GT	GT4	Strep. salivarius
contig_9_35	CAN80640.1|GT47	ODP-AF04-108	GT	GT47	Strep. salivarius
contig_9_55	ALR08738.2|GT83	ODP-AF04-108	GT	GT83	Strep. salivarius
contig_9_85	QMI51832.1|GH73	ODP-AF04-108	GH	GH73	Strep. salivarius
contig_9_110	AEJ52449.1|GH23	ODP-AF04-108	GH	GH23	Strep. salivarius
contig_9_111	SQF76967.1|CBM50	ODP-AF04-108	CBM	CBM50	Strep. salivarius
contig_10_41	QXF33454.1|GH13_3	ODP-AF04-108	GH	GH13_3	Strep. salivarius
contig_10_46	ARI60575.1|CE9	ODP-AF04-108	CE	CE9	Strep. salivarius
contig_10_51	ARI58749.1|GH73	ODP-AF04-108	GH	GH73	Strep. salivarius
contig_10_65	CAD7245033.1|GT58	ODP-AF04-108	GT	GT58	Strep. salivarius
contig_11_6	AGL63717.2|GT4	ODP-AF04-108	GT	GT4	Strep. salivarius
contig_11_36	CCO12112.2|GH13_31	ODP-AF04-108	GH	GH13_31	Strep. salivarius
contig_11_47	CCO09729.2|GH1	ODP-AF04-108	GH	GH1	Strep. salivarius
contig_11_83	SQF76278.1|GT2|GT8	ODP-AF04-108	GT	GT2	Strep. salivarius
contig_11_83	SQF76278.1|GT2|GT8	ODP-AF04-108	GT	GT8	Strep. salivarius
contig_12_21	CAI32748.2|GT4	ODP-AF04-108	GT	GT4	Strep. salivarius
contig_12_54	CCO12868.2|GH1	ODP-AF04-108	GH	GH1	Strep. salivarius
contig_12_56	ARC23275.1|GT51	ODP-AF04-108	GT	GT51	Strep. salivarius
contig_12_61	WAO96723.1|GH0	ODP-AF04-108	GH	GH0	Strep. salivarius
contig_12_70	SQF76856.1|GH13_29	ODP-AF04-108	GH	GH13_29	Strep. salivarius
contig_12_71	QCH95999.1|GH13_29	ODP-AF04-108	GH	GH13_29	Strep. salivarius
contig_13_3	QBQ55251.1|CBM50	ODP-AF04-108	CBM	CBM50	Strep. salivarius
contig_13_8	AGL64345.2|GT2	ODP-AF04-108	GT	GT2	Strep. salivarius
contig_14_8	ARI58783.1|GH13_5	ODP-AF04-108	GH	GH13_5	Strep. salivarius
contig_14_39	AIY21653.1|CE4	ODP-AF04-108	CE	CE4	Strep. salivarius
contig_14_46	AGL63702.2|GT4	ODP-AF04-108	GT	GT4	Strep. salivarius
contig_15_9	ARI59747.1|GT8	ODP-AF04-108	GT	GT8	Strep. salivarius
contig_15_10	QEM33039.1|GT101|GT8	ODP-AF04-108	GT	GT101	Strep. salivarius
contig_15_10	QEM33039.1|GT101|GT8	ODP-AF04-108	GT	GT8	Strep. salivarius
contig_15_11	CCB92928.1|GT2	ODP-AF04-108	GT	GT2	Strep. salivarius
contig_15_12	QGU82276.1|GT8	ODP-AF04-108	GT	GT8	Strep. salivarius
contig_15_13	CCB92926.1|GT113	ODP-AF04-108	GT	GT113	Strep. salivarius
contig_15_14	SQF75540.1|GT8	ODP-AF04-108	GT	GT8	Strep. salivarius
contig_15_15	AEJ53043.1|GT4	ODP-AF04-108	GT	GT4	Strep. salivarius
contig_15_16	SQF75538.1|GT8	ODP-AF04-108	GT	GT8	Strep. salivarius
contig_15_17	QEM33046.1|GT8	ODP-AF04-108	GT	GT8	Strep. salivarius
contig_15_18	ARI59740.1|GT2|GT8	ODP-AF04-108	GT	GT2	Strep. salivarius
contig_15_18	ARI59740.1|GT2|GT8	ODP-AF04-108	GT	GT8	Strep. salivarius
contig_16_12	SQF76383.1|GT4	ODP-AF04-108	GT	GT4	Strep. salivarius
contig_16_13	ARI57675.1|GT4	ODP-AF04-108	GT	GT4	Strep. salivarius
contig_16_14	CAN65674.1|GH28	ODP-AF04-108	GH	GH28	Strep. salivarius
contig_17_9	ARI59334.1|GH73	ODP-AF04-108	GH	GH73	Strep. salivarius
contig_17_28	CAE6076421.1|GH27	ODP-AF04-108	GH	GH27	Strep. salivarius
contig_17_32	CAD7252417.1|GH13	ODP-AF04-108	GH	GH13	Strep. salivarius
contig_17_35	AGL63717.2|GT4	ODP-AF04-108	GT	GT4	Strep. salivarius
contig_18_6	CUS05224.2|CE14	ODP-AF04-108	CE	CE14	Strep. salivarius
contig_18_22	QYU66396.1|GH13_23	ODP-AF04-108	GH	GH13_23	Strep. salivarius
contig_18_24	CCO12102.2|GH13_31	ODP-AF04-108	GH	GH13_31	Strep. salivarius
contig_19_13	QBQ55251.1|CBM50	ODP-AF04-108	CBM	CBM50	Strep. salivarius
contig_19_24	ARI60189.1|GH73	ODP-AF04-108	GH	GH73	Strep. salivarius
contig_19_25	ARI60189.1|GH73	ODP-AF04-108	GH	GH73	Strep. salivarius
contig_20_1	AEJ52969.1|GT2	ODP-AF04-108	GT	GT2	Strep. salivarius
contig_20_3	QBS00312.1|GT2	ODP-AF04-108	GT	GT2	Strep. salivarius
contig_20_4	AEJ52966.1|GT2	ODP-AF04-108	GT	GT2	Strep. salivarius
contig_20_8	AEJ52962.1|GT2	ODP-AF04-108	GT	GT2	Strep. salivarius
contig_21_1	QGU78609.1|GH25	ODP-AF04-108	GH	GH25	Strep. salivarius
contig_21_18	QEM32654.1|GH1	ODP-AF04-108	GH	GH1	Strep. salivarius
contig_22_2	AEJ53414.1|GT35	ODP-AF04-108	GT	GT35	Strep. salivarius
contig_22_3	QGU82617.1|GH77	ODP-AF04-108	GH	GH77	Strep. salivarius
contig_22_18	QEM32671.1|CBM41|CBM48|GH13_12	ODP-AF04-108	CBM	CBM41	Strep. salivarius
contig_22_18	QEM32671.1|CBM41|CBM48|GH13_12	ODP-AF04-108	CBM	CBM48	Strep. salivarius
contig_22_18	QEM32671.1|CBM41|CBM48|GH13_12	ODP-AF04-108	GH	GH13_12	Strep. salivarius
contig_22_19	AEJ53493.1|GH73	ODP-AF04-108	GH	GH73	Strep. salivarius
contig_23_6	QGU82661.1|GT26	ODP-AF04-108	GT	GT26	Strep. salivarius
contig_23_8	QEM32644.1|GT2	ODP-AF04-108	GT	GT2	Strep. salivarius
contig_23_9	QEM32645.1|GT4	ODP-AF04-108	GT	GT4	Strep. salivarius
contig_23_11	QEM32646.1|GT2	ODP-AF04-108	GT	GT2	Strep. salivarius
contig_23_12	QTF54836.1|GT0	ODP-AF04-108	GT	GT0	Strep. salivarius
contig_25_1	QEM33274.1|GH32	ODP-AF04-108	GH	GH32	Strep. salivarius
contig_25_2	QEM33273.1|GH68	ODP-AF04-108	GH	GH68	Strep. salivarius
contig_25_8	CCO10293.2|CBM50	ODP-AF04-108	CBM	CBM50	Strep. salivarius
contig_27_4	WJM08831.1|CBM50	ODP-AF04-108	CBM	CBM50	Strep. salivarius
contig_28_2	CAD7226128.1|GH38	ODP-AF04-108	GH	GH38	Strep. salivarius
contig_29_8	QGU82405.1|CBM66|GH32	ODP-AF04-108	CBM	CBM66	Strep. salivarius
contig_29_8	QGU82405.1|CBM66|GH32	ODP-AF04-108	GH	GH32	Strep. salivarius
contig_32_5	CCB93441.1|GH8	ODP-AF04-108	GH	GH8	Strep. salivarius
contig_32_6	QEM32588.1|GT2	ODP-AF04-108	GT	GT2	Strep. salivarius
contig_32_9	WEA13229.1|GT0	ODP-AF04-108	GT	GT0	Strep. salivarius
contig_42_1	QGU78609.1|GH25	ODP-AF04-108	GH	GH25	Strep. salivarius
contig_1_15	CAG7911095.1|GH5_11	ODP-AF04-238	GH	GH5_11	Strep. sanguinis
contig_1_19	CBA03971.1|GT30	ODP-AF04-238	GT	GT30	Strep. sanguinis
contig_1_72	QCH95999.1|GH13_29	ODP-AF04-238	GH	GH13_29	Strep. sanguinis
contig_1_73	VDY70531.1|GH13	ODP-AF04-238	GH	GH13	Strep. sanguinis
contig_1_76	CCO11054.2|CBM50	ODP-AF04-238	CBM	CBM50	Strep. sanguinis
contig_1_90	CCO10293.2|CBM50	ODP-AF04-238	CBM	CBM50	Strep. sanguinis
contig_1_108	CCO12633.2|GH84	ODP-AF04-238	GH	GH84	Strep. sanguinis
contig_1_119	SQF28228.1|GH1	ODP-AF04-238	GH	GH1	Strep. sanguinis
contig_1_170	AGL63871.2|GT2	ODP-AF04-238	GT	GT2	Strep. sanguinis
contig_1_228	SQF70939.1|GT4	ODP-AF04-238	GT	GT4	Strep. sanguinis
contig_1_229	QKQ43500.1|GT4	ODP-AF04-238	GT	GT4	Strep. sanguinis
contig_1_232	CAN65674.1|GH28	ODP-AF04-238	GH	GH28	Strep. sanguinis
contig_1_275	QKQ43545.1|GH25	ODP-AF04-238	GH	GH25	Strep. sanguinis
contig_1_281	QLB49828.1|GT8	ODP-AF04-238	GT	GT8	Strep. sanguinis
contig_1_282	QIP49629.1|GT2	ODP-AF04-238	GT	GT2	Strep. sanguinis
contig_1_284	QKQ43554.1|GT2	ODP-AF04-238	GT	GT2	Strep. sanguinis
contig_1_285	QKQ43555.1|GT2|GT4	ODP-AF04-238	GT	GT2	Strep. sanguinis
contig_1_285	QKQ43555.1|GT2|GT4	ODP-AF04-238	GT	GT4	Strep. sanguinis
contig_1_287	SQF71003.1|GT4	ODP-AF04-238	GT	GT4	Strep. sanguinis
contig_1_288	QLB49832.1|GT4	ODP-AF04-238	GT	GT4	Strep. sanguinis
contig_1_289	QLB49833.1|GT2	ODP-AF04-238	GT	GT2	Strep. sanguinis
contig_1_292	SQF25488.1|GT0	ODP-AF04-238	GT	GT0	Strep. sanguinis
contig_1_312	ANS88621.1|GH23	ODP-AF04-238	GH	GH23	Strep. sanguinis
contig_1_313	AJW72812.1|GH23	ODP-AF04-238	GH	GH23	Strep. sanguinis
contig_1_356	SQF71029.1|CBM41|CBM48|GH13_14	ODP-AF04-238	CBM	CBM41	Strep. sanguinis
contig_1_356	SQF71029.1|CBM41|CBM48|GH13_14	ODP-AF04-238	CBM	CBM48	Strep. sanguinis
contig_1_356	SQF71029.1|CBM41|CBM48|GH13_14	ODP-AF04-238	GH	GH13_14	Strep. sanguinis
contig_1_370	CCO09729.2|GH1	ODP-AF04-238	GH	GH1	Strep. sanguinis
contig_1_381	SQG30567.1|CBM34|GH13_20	ODP-AF04-238	CBM	CBM34	Strep. sanguinis
contig_1_381	SQG30567.1|CBM34|GH13_20	ODP-AF04-238	GH	GH13_20	Strep. sanguinis
contig_1_421	QAY63367.1|GT2	ODP-AF04-238	GT	GT2	Strep. sanguinis
contig_1_495	SQF34919.1|GT2	ODP-AF04-238	GT	GT2	Strep. sanguinis
contig_1_497	QLB52130.1|GT1	ODP-AF04-238	GT	GT1	Strep. sanguinis
contig_1_501	CAE6204650.1|GH28	ODP-AF04-238	GH	GH28	Strep. sanguinis
contig_1_599	CCO11994.2|GT4	ODP-AF04-238	GT	GT4	Strep. sanguinis
contig_1_601	BEI59196.1|GH130_1	ODP-AF04-238	GH	GH130_1	Strep. sanguinis
contig_1_641	ABN44565.1|GH23	ODP-AF04-238	GH	GH23	Strep. sanguinis
contig_1_643	AMJ20543.1|GH13_11	ODP-AF04-238	GH	GH13_11	Strep. sanguinis
contig_1_646	AGL64700.2|GH23	ODP-AF04-238	GH	GH23	Strep. sanguinis
contig_1_649	ALD72388.1|GH1	ODP-AF04-238	GH	GH1	Strep. sanguinis
contig_1_654	VDY71689.1|GH20	ODP-AF04-238	GH	GH20	Strep. sanguinis
contig_1_661	AGL63717.2|GT4	ODP-AF04-238	GT	GT4	Strep. sanguinis
contig_2_21	QYO62262.1|GH13	ODP-AF04-238	GH	GH13	Strep. sanguinis
contig_2_35	UMV50746.1|CBM50	ODP-AF04-238	CBM	CBM50	Strep. sanguinis
contig_2_61	CCO12612.2|GH1	ODP-AF04-238	GH	GH1	Strep. sanguinis
contig_2_62	SQF72132.1|GH35	ODP-AF04-238	GH	GH35	Strep. sanguinis
contig_2_66	SQG31156.1|GT2	ODP-AF04-238	GT	GT2	Strep. sanguinis
contig_2_77	CUS04921.2|GT4	ODP-AF04-238	GT	GT4	Strep. sanguinis
contig_2_81	SQG31134.1|CBM50	ODP-AF04-238	CBM	CBM50	Strep. sanguinis
contig_2_145	BBF72686.1|GT2	ODP-AF04-238	GT	GT2	Strep. sanguinis
contig_2_161	QKQ44555.1|GH1	ODP-AF04-238	GH	GH1	Strep. sanguinis
contig_2_173	VEE20378.1|GH1	ODP-AF04-238	GH	GH1	Strep. sanguinis
contig_2_198	SQG31016.1|GH36	ODP-AF04-238	GH	GH36	Strep. sanguinis
contig_2_204	BBD21966.1|GT2	ODP-AF04-238	GT	GT2	Strep. sanguinis
contig_2_205	ABN43875.1|GT2	ODP-AF04-238	GT	GT2	Strep. sanguinis
contig_2_234	ABN43901.1|CBM41|CBM48|GH13_12	ODP-AF04-238	CBM	CBM41	Strep. sanguinis
contig_2_234	ABN43901.1|CBM41|CBM48|GH13_12	ODP-AF04-238	CBM	CBM48	Strep. sanguinis
contig_2_234	ABN43901.1|CBM41|CBM48|GH13_12	ODP-AF04-238	GH	GH13_12	Strep. sanguinis
contig_2_236	ABN43903.1|GH32	ODP-AF04-238	GH	GH32	Strep. sanguinis
contig_2_237	AOG60880.1|GH32	ODP-AF04-238	GH	GH32	Strep. sanguinis
contig_2_335	ALR08738.2|GT83	ODP-AF04-238	GT	GT83	Strep. sanguinis
contig_2_393	VDY72402.1|GH70	ODP-AF04-238	GH	GH70	Strep. sanguinis
contig_2_430	SQF34156.1|GT28	ODP-AF04-238	GT	GT28	Strep. sanguinis
contig_2_446	AGL63717.2|GT4	ODP-AF04-238	GT	GT4	Strep. sanguinis
contig_2_451	CCO11632.2|GH3	ODP-AF04-238	GH	GH3	Strep. sanguinis
contig_2_471	AGL63702.2|GT4	ODP-AF04-238	GT	GT4	Strep. sanguinis
contig_2_480	VDY72311.1|GT8	ODP-AF04-238	GT	GT8	Strep. sanguinis
contig_2_515	QUI22575.1|CBM50	ODP-AF04-238	CBM	CBM50	Strep. sanguinis
contig_2_538	QLB52587.1|CBM48|GH13_9	ODP-AF04-238	CBM	CBM48	Strep. sanguinis
contig_2_538	QLB52587.1|CBM48|GH13_9	ODP-AF04-238	GH	GH13_9	Strep. sanguinis
contig_2_539	BBM21727.1|GH13_9	ODP-AF04-238	GH	GH13_9	Strep. sanguinis
contig_2_541	ABN44209.1|GT5	ODP-AF04-238	GT	GT5	Strep. sanguinis
contig_2_542	ABN44210.1|GT35	ODP-AF04-238	GT	GT35	Strep. sanguinis
contig_2_551	CAD7245033.1|GT58	ODP-AF04-238	GT	GT58	Strep. sanguinis
contig_3_14	CCO12102.2|GH13_31	ODP-AF04-238	GH	GH13_31	Strep. sanguinis
contig_3_18	QYU66396.1|GH13_23	ODP-AF04-238	GH	GH13_23	Strep. sanguinis
contig_3_33	QLB51271.1|GH35	ODP-AF04-238	GH	GH35	Strep. sanguinis
contig_3_63	QWU85921.1|GH130	ODP-AF04-238	GH	GH130	Strep. sanguinis
contig_3_65	SQF33637.1|CBM50	ODP-AF04-238	CBM	CBM50	Strep. sanguinis
contig_3_67	ABN45630.1|CBM48|CBM68|GH13_14	ODP-AF04-238	CBM	CBM48	Strep. sanguinis
contig_3_67	ABN45630.1|CBM48|CBM68|GH13_14	ODP-AF04-238	CBM	CBM68	Strep. sanguinis
contig_3_67	ABN45630.1|CBM48|CBM68|GH13_14	ODP-AF04-238	GH	GH13_14	Strep. sanguinis
contig_3_69	QLB49187.1|GH77	ODP-AF04-238	GH	GH77	Strep. sanguinis
contig_3_70	SQF70288.1|GT35	ODP-AF04-238	GT	GT35	Strep. sanguinis
contig_3_115	ABN45583.1|GT2	ODP-AF04-238	GT	GT2	Strep. sanguinis
contig_3_116	ABN45582.1|GT2	ODP-AF04-238	GT	GT2	Strep. sanguinis
contig_3_125	QKQ45063.1|GT51	ODP-AF04-238	GT	GT51	Strep. sanguinis
contig_3_134	AGL63717.2|GT4	ODP-AF04-238	GT	GT4	Strep. sanguinis
contig_3_148	CAN80640.1|GT47	ODP-AF04-238	GT	GT47	Strep. sanguinis
contig_3_168	CAI32748.2|GT4	ODP-AF04-238	GT	GT4	Strep. sanguinis
contig_3_226	CAD7226128.1|GH38	ODP-AF04-238	GH	GH38	Strep. sanguinis
contig_3_237	AGL63717.2|GT4	ODP-AF04-238	GT	GT4	Strep. sanguinis
contig_3_265	AGL64353.2|CBM50|GH25	ODP-AF04-238	CBM	CBM50	Strep. sanguinis
contig_3_265	AGL64353.2|CBM50|GH25	ODP-AF04-238	GH	GH25	Strep. sanguinis
contig_3_289	CAD7252417.1|GH13	ODP-AF04-238	GH	GH13	Strep. sanguinis
contig_4_4	VDY71773.1|GH73	ODP-AF04-238	GH	GH73	Strep. sanguinis
contig_4_34	SQF34679.1|GH3	ODP-AF04-238	GH	GH3	Strep. sanguinis
contig_4_48	CAG7883609.1|GT1	ODP-AF04-238	GT	GT1	Strep. sanguinis
contig_4_76	SQF71446.1|GH13_5	ODP-AF04-238	GH	GH13_5	Strep. sanguinis
contig_4_78	SQF34634.1|GT4	ODP-AF04-238	GT	GT4	Strep. sanguinis
contig_4_90	ADN17640.1|GT2	ODP-AF04-238	GT	GT2	Strep. sanguinis
contig_4_123	ABN44383.1|CE4	ODP-AF04-238	CE	CE4	Strep. sanguinis
contig_4_158	AGL64020.2|AA10	ODP-AF04-238	AA	AA10	Strep. sanguinis
contig_4_187	CCO12112.2|GH13_31	ODP-AF04-238	GH	GH13_31	Strep. sanguinis
contig_4_205	QBQ55251.1|CBM50	ODP-AF04-238	CBM	CBM50	Strep. sanguinis
contig_4_211	QKQ44121.1|GH25	ODP-AF04-238	GH	GH25	Strep. sanguinis
contig_4_215	ABN44282.1|GT2	ODP-AF04-238	GT	GT2	Strep. sanguinis
contig_4_231	SQF34421.1|GT8	ODP-AF04-238	GT	GT8	Strep. sanguinis
contig_4_232	SQG29993.1|GT4	ODP-AF04-238	GT	GT4	Strep. sanguinis
contig_4_238	QKQ44148.1|GT113	ODP-AF04-238	GT	GT113	Strep. sanguinis
contig_4_239	SQF71619.1|GT101|GT8	ODP-AF04-238	GT	GT101	Strep. sanguinis
contig_4_239	SQF71619.1|GT101|GT8	ODP-AF04-238	GT	GT8	Strep. sanguinis
contig_5_26	ABN45241.1|GT51	ODP-AF04-238	GT	GT51	Strep. sanguinis
contig_5_57	SQF70661.1|CE9	ODP-AF04-238	CE	CE9	Strep. sanguinis
contig_5_59	AGL64345.2|GT2	ODP-AF04-238	GT	GT2	Strep. sanguinis
contig_6_13	SQG29543.1|CBM66|GH32	ODP-AF04-238	CBM	CBM66	Strep. sanguinis
contig_6_13	SQG29543.1|CBM66|GH32	ODP-AF04-238	GH	GH32	Strep. sanguinis
contig_8_6	QBQ55156.1|CBM50	ODP-AF04-238	CBM	CBM50	Strep. sanguinis
contig_8_15	ABN43636.1|GT51	ODP-AF04-238	GT	GT51	Strep. sanguinis
contig_8_17	CCO12868.2|GH1	ODP-AF04-238	GH	GH1	Strep. sanguinis
contig_8_18	WEA13229.1|GT0	ODP-AF04-238	GT	GT0	Strep. sanguinis
contig_8_21	SQG31238.1|GT2	ODP-AF04-238	GT	GT2	Strep. sanguinis
contig_8_22	VDY72836.1|GH8	ODP-AF04-238	GH	GH8	Strep. sanguinis
contig_9_10	ALR08738.2|GT83	ODP-AF04-238	GT	GT83	Strep. sanguinis
contig_10_8	QLB51038.1|GH73	ODP-AF04-238	GH	GH73	Strep. sanguinis
contig_11_9	WAO96723.1|GH0	ODP-AF04-238	GH	GH0	Strep. sanguinis
contig_1_37	AGL63717.2|GT4	ODP-AF04-243	GT	GT4	Strep. sanguinis
contig_1_44	VDY71689.1|GH20	ODP-AF04-243	GH	GH20	Strep. sanguinis
contig_1_49	ALD72388.1|GH1	ODP-AF04-243	GH	GH1	Strep. sanguinis
contig_1_52	AGL64700.2|GH23	ODP-AF04-243	GH	GH23	Strep. sanguinis
contig_1_55	AMJ20543.1|GH13_11	ODP-AF04-243	GH	GH13_11	Strep. sanguinis
contig_1_57	ABN44565.1|GH23	ODP-AF04-243	GH	GH23	Strep. sanguinis
contig_1_97	BEI59196.1|GH130_1	ODP-AF04-243	GH	GH130_1	Strep. sanguinis
contig_1_99	CCO11994.2|GT4	ODP-AF04-243	GT	GT4	Strep. sanguinis
contig_1_197	CAE6204650.1|GH28	ODP-AF04-243	GH	GH28	Strep. sanguinis
contig_1_201	QLB52130.1|GT1	ODP-AF04-243	GT	GT1	Strep. sanguinis
contig_1_203	SQF34919.1|GT2	ODP-AF04-243	GT	GT2	Strep. sanguinis
contig_1_277	QAY63367.1|GT2	ODP-AF04-243	GT	GT2	Strep. sanguinis
contig_1_317	SQG30567.1|CBM34|GH13_20	ODP-AF04-243	CBM	CBM34	Strep. sanguinis
contig_1_317	SQG30567.1|CBM34|GH13_20	ODP-AF04-243	GH	GH13_20	Strep. sanguinis
contig_1_328	CCO09729.2|GH1	ODP-AF04-243	GH	GH1	Strep. sanguinis
contig_1_342	SQF71029.1|CBM41|CBM48|GH13_14	ODP-AF04-243	CBM	CBM41	Strep. sanguinis
contig_1_342	SQF71029.1|CBM41|CBM48|GH13_14	ODP-AF04-243	CBM	CBM48	Strep. sanguinis
contig_1_342	SQF71029.1|CBM41|CBM48|GH13_14	ODP-AF04-243	GH	GH13_14	Strep. sanguinis
contig_1_384	AJW72812.1|GH23	ODP-AF04-243	GH	GH23	Strep. sanguinis
contig_1_385	ANS88621.1|GH23	ODP-AF04-243	GH	GH23	Strep. sanguinis
contig_1_405	SQF25488.1|GT0	ODP-AF04-243	GT	GT0	Strep. sanguinis
contig_1_408	QLB49833.1|GT2	ODP-AF04-243	GT	GT2	Strep. sanguinis
contig_1_409	QLB49832.1|GT4	ODP-AF04-243	GT	GT4	Strep. sanguinis
contig_1_410	SQF71003.1|GT4	ODP-AF04-243	GT	GT4	Strep. sanguinis
contig_1_412	QKQ43555.1|GT2|GT4	ODP-AF04-243	GT	GT2	Strep. sanguinis
contig_1_412	QKQ43555.1|GT2|GT4	ODP-AF04-243	GT	GT4	Strep. sanguinis
contig_1_413	QKQ43554.1|GT2	ODP-AF04-243	GT	GT2	Strep. sanguinis
contig_1_415	QIP49629.1|GT2	ODP-AF04-243	GT	GT2	Strep. sanguinis
contig_1_416	QLB49828.1|GT8	ODP-AF04-243	GT	GT8	Strep. sanguinis
contig_1_422	QKQ43545.1|GH25	ODP-AF04-243	GH	GH25	Strep. sanguinis
contig_1_465	CAN65674.1|GH28	ODP-AF04-243	GH	GH28	Strep. sanguinis
contig_1_468	QKQ43500.1|GT4	ODP-AF04-243	GT	GT4	Strep. sanguinis
contig_1_469	SQF70939.1|GT4	ODP-AF04-243	GT	GT4	Strep. sanguinis
contig_1_528	AGL63871.2|GT2	ODP-AF04-243	GT	GT2	Strep. sanguinis
contig_1_579	SQF28228.1|GH1	ODP-AF04-243	GH	GH1	Strep. sanguinis
contig_1_590	CCO12633.2|GH84	ODP-AF04-243	GH	GH84	Strep. sanguinis
contig_1_608	CCO10293.2|CBM50	ODP-AF04-243	CBM	CBM50	Strep. sanguinis
contig_1_622	CCO11054.2|CBM50	ODP-AF04-243	CBM	CBM50	Strep. sanguinis
contig_1_625	VDY70531.1|GH13	ODP-AF04-243	GH	GH13	Strep. sanguinis
contig_1_626	QCH95999.1|GH13_29	ODP-AF04-243	GH	GH13_29	Strep. sanguinis
contig_1_679	CBA03971.1|GT30	ODP-AF04-243	GT	GT30	Strep. sanguinis
contig_1_683	CAG7911095.1|GH5_11	ODP-AF04-243	GH	GH5_11	Strep. sanguinis
contig_2_47	CAD7245033.1|GT58	ODP-AF04-243	GT	GT58	Strep. sanguinis
contig_2_56	ABN44210.1|GT35	ODP-AF04-243	GT	GT35	Strep. sanguinis
contig_2_57	ABN44209.1|GT5	ODP-AF04-243	GT	GT5	Strep. sanguinis
contig_2_59	BBM21727.1|GH13_9	ODP-AF04-243	GH	GH13_9	Strep. sanguinis
contig_2_60	QLB52587.1|CBM48|GH13_9	ODP-AF04-243	CBM	CBM48	Strep. sanguinis
contig_2_60	QLB52587.1|CBM48|GH13_9	ODP-AF04-243	GH	GH13_9	Strep. sanguinis
contig_2_83	QUI22575.1|CBM50	ODP-AF04-243	CBM	CBM50	Strep. sanguinis
contig_2_118	VDY72311.1|GT8	ODP-AF04-243	GT	GT8	Strep. sanguinis
contig_2_127	AGL63702.2|GT4	ODP-AF04-243	GT	GT4	Strep. sanguinis
contig_2_147	CCO11632.2|GH3	ODP-AF04-243	GH	GH3	Strep. sanguinis
contig_2_152	AGL63717.2|GT4	ODP-AF04-243	GT	GT4	Strep. sanguinis
contig_2_168	SQF34156.1|GT28	ODP-AF04-243	GT	GT28	Strep. sanguinis
contig_2_205	VDY72402.1|GH70	ODP-AF04-243	GH	GH70	Strep. sanguinis
contig_2_263	ALR08738.2|GT83	ODP-AF04-243	GT	GT83	Strep. sanguinis
contig_2_361	AOG60880.1|GH32	ODP-AF04-243	GH	GH32	Strep. sanguinis
contig_2_362	ABN43903.1|GH32	ODP-AF04-243	GH	GH32	Strep. sanguinis
contig_2_364	ABN43901.1|CBM41|CBM48|GH13_12	ODP-AF04-243	CBM	CBM41	Strep. sanguinis
contig_2_364	ABN43901.1|CBM41|CBM48|GH13_12	ODP-AF04-243	CBM	CBM48	Strep. sanguinis
contig_2_364	ABN43901.1|CBM41|CBM48|GH13_12	ODP-AF04-243	GH	GH13_12	Strep. sanguinis
contig_2_393	ABN43875.1|GT2	ODP-AF04-243	GT	GT2	Strep. sanguinis
contig_2_394	BBD21966.1|GT2	ODP-AF04-243	GT	GT2	Strep. sanguinis
contig_2_400	SQG31016.1|GH36	ODP-AF04-243	GH	GH36	Strep. sanguinis
contig_2_425	VEE20378.1|GH1	ODP-AF04-243	GH	GH1	Strep. sanguinis
contig_2_437	QKQ44555.1|GH1	ODP-AF04-243	GH	GH1	Strep. sanguinis
contig_2_453	BBF72686.1|GT2	ODP-AF04-243	GT	GT2	Strep. sanguinis
contig_2_517	SQG31134.1|CBM50	ODP-AF04-243	CBM	CBM50	Strep. sanguinis
contig_2_521	CUS04921.2|GT4	ODP-AF04-243	GT	GT4	Strep. sanguinis
contig_2_532	SQG31156.1|GT2	ODP-AF04-243	GT	GT2	Strep. sanguinis
contig_2_536	SQF72132.1|GH35	ODP-AF04-243	GH	GH35	Strep. sanguinis
contig_2_537	CCO12612.2|GH1	ODP-AF04-243	GH	GH1	Strep. sanguinis
contig_2_563	UMV50746.1|CBM50	ODP-AF04-243	CBM	CBM50	Strep. sanguinis
contig_2_577	QYO62262.1|GH13	ODP-AF04-243	GH	GH13	Strep. sanguinis
contig_2_619	VDY72836.1|GH8	ODP-AF04-243	GH	GH8	Strep. sanguinis
contig_2_620	SQG31238.1|GT2	ODP-AF04-243	GT	GT2	Strep. sanguinis
contig_2_623	WEA13229.1|GT0	ODP-AF04-243	GT	GT0	Strep. sanguinis
contig_2_624	CCO12868.2|GH1	ODP-AF04-243	GH	GH1	Strep. sanguinis
contig_2_626	ABN43636.1|GT51	ODP-AF04-243	GT	GT51	Strep. sanguinis
contig_2_635	QBQ55156.1|CBM50	ODP-AF04-243	CBM	CBM50	Strep. sanguinis
contig_3_14	CCO12102.2|GH13_31	ODP-AF04-243	GH	GH13_31	Strep. sanguinis
contig_3_18	QYU66396.1|GH13_23	ODP-AF04-243	GH	GH13_23	Strep. sanguinis
contig_3_33	QLB51271.1|GH35	ODP-AF04-243	GH	GH35	Strep. sanguinis
contig_3_63	QWU85921.1|GH130	ODP-AF04-243	GH	GH130	Strep. sanguinis
contig_3_65	SQF33637.1|CBM50	ODP-AF04-243	CBM	CBM50	Strep. sanguinis
contig_3_67	ABN45630.1|CBM48|CBM68|GH13_14	ODP-AF04-243	CBM	CBM48	Strep. sanguinis
contig_3_67	ABN45630.1|CBM48|CBM68|GH13_14	ODP-AF04-243	CBM	CBM68	Strep. sanguinis
contig_3_67	ABN45630.1|CBM48|CBM68|GH13_14	ODP-AF04-243	GH	GH13_14	Strep. sanguinis
contig_3_69	QLB49187.1|GH77	ODP-AF04-243	GH	GH77	Strep. sanguinis
contig_3_70	SQF70288.1|GT35	ODP-AF04-243	GT	GT35	Strep. sanguinis
contig_3_115	ABN45583.1|GT2	ODP-AF04-243	GT	GT2	Strep. sanguinis
contig_3_116	ABN45582.1|GT2	ODP-AF04-243	GT	GT2	Strep. sanguinis
contig_3_125	QKQ45063.1|GT51	ODP-AF04-243	GT	GT51	Strep. sanguinis
contig_3_134	AGL63717.2|GT4	ODP-AF04-243	GT	GT4	Strep. sanguinis
contig_3_148	CAN80640.1|GT47	ODP-AF04-243	GT	GT47	Strep. sanguinis
contig_3_169	CAI32748.2|GT4	ODP-AF04-243	GT	GT4	Strep. sanguinis
contig_3_227	CAD7226128.1|GH38	ODP-AF04-243	GH	GH38	Strep. sanguinis
contig_3_238	AGL63717.2|GT4	ODP-AF04-243	GT	GT4	Strep. sanguinis
contig_3_266	AGL64353.2|CBM50|GH25	ODP-AF04-243	CBM	CBM50	Strep. sanguinis
contig_3_266	AGL64353.2|CBM50|GH25	ODP-AF04-243	GH	GH25	Strep. sanguinis
contig_3_290	CAD7252417.1|GH13	ODP-AF04-243	GH	GH13	Strep. sanguinis
contig_4_4	VDY71773.1|GH73	ODP-AF04-243	GH	GH73	Strep. sanguinis
contig_4_34	SQF34679.1|GH3	ODP-AF04-243	GH	GH3	Strep. sanguinis
contig_4_48	CAG7883609.1|GT1	ODP-AF04-243	GT	GT1	Strep. sanguinis
contig_4_76	SQF71446.1|GH13_5	ODP-AF04-243	GH	GH13_5	Strep. sanguinis
contig_4_78	SQF34634.1|GT4	ODP-AF04-243	GT	GT4	Strep. sanguinis
contig_4_90	ADN17640.1|GT2	ODP-AF04-243	GT	GT2	Strep. sanguinis
contig_4_123	ABN44383.1|CE4	ODP-AF04-243	CE	CE4	Strep. sanguinis
contig_4_158	AGL64020.2|AA10	ODP-AF04-243	AA	AA10	Strep. sanguinis
contig_5_26	ABN45241.1|GT51	ODP-AF04-243	GT	GT51	Strep. sanguinis
contig_5_57	SQF70661.1|CE9	ODP-AF04-243	CE	CE9	Strep. sanguinis
contig_5_59	AGL64345.2|GT2	ODP-AF04-243	GT	GT2	Strep. sanguinis
contig_6_2	SQF71619.1|GT101|GT8	ODP-AF04-243	GT	GT101	Strep. sanguinis
contig_6_2	SQF71619.1|GT101|GT8	ODP-AF04-243	GT	GT8	Strep. sanguinis
contig_6_3	QKQ44148.1|GT113	ODP-AF04-243	GT	GT113	Strep. sanguinis
contig_6_9	SQG29993.1|GT4	ODP-AF04-243	GT	GT4	Strep. sanguinis
contig_6_10	SQF34421.1|GT8	ODP-AF04-243	GT	GT8	Strep. sanguinis
contig_6_26	ABN44282.1|GT2	ODP-AF04-243	GT	GT2	Strep. sanguinis
contig_6_30	QKQ44121.1|GH25	ODP-AF04-243	GH	GH25	Strep. sanguinis
contig_6_36	QBQ55251.1|CBM50	ODP-AF04-243	CBM	CBM50	Strep. sanguinis
contig_6_54	CCO12112.2|GH13_31	ODP-AF04-243	GH	GH13_31	Strep. sanguinis
contig_7_13	SQG29543.1|CBM66|GH32	ODP-AF04-243	CBM	CBM66	Strep. sanguinis
contig_7_13	SQG29543.1|CBM66|GH32	ODP-AF04-243	GH	GH32	Strep. sanguinis
contig_9_10	ALR08738.2|GT83	ODP-AF04-243	GT	GT83	Strep. sanguinis
contig_10_8	QLB51038.1|GH73	ODP-AF04-243	GH	GH73	Strep. sanguinis
contig_11_9	WAO96723.1|GH0	ODP-AF04-243	GH	GH0	Strep. sanguinis
contig_1_2	QGU82405.1|CBM66|GH32	ODP-AF04-71	CBM	CBM66	Strep. salivarius
contig_1_2	QGU82405.1|CBM66|GH32	ODP-AF04-71	GH	GH32	Strep. salivarius
contig_1_44	AGL64700.2|GH23	ODP-AF04-71	GH	GH23	Strep. salivarius
contig_1_48	AMJ20543.1|GH13_11	ODP-AF04-71	GH	GH13_11	Strep. salivarius
contig_1_50	SQF75762.1|GH23	ODP-AF04-71	GH	GH23	Strep. salivarius
contig_1_62	BEI59196.1|GH130_1	ODP-AF04-71	GH	GH130_1	Strep. salivarius
contig_1_103	AEJ53294.1|GH73	ODP-AF04-71	GH	GH73	Strep. salivarius
contig_1_148	CAE6204650.1|GH28	ODP-AF04-71	GH	GH28	Strep. salivarius
contig_1_176	AGL64020.2|AA10	ODP-AF04-71	AA	AA10	Strep. salivarius
contig_2_32	WAO96723.1|GH0	ODP-AF04-71	GH	GH0	Strep. salivarius
contig_2_43	AGL63717.2|GT4	ODP-AF04-71	GT	GT4	Strep. salivarius
contig_2_61	CCB94001.1|GH1	ODP-AF04-71	GH	GH1	Strep. salivarius
contig_2_67	AIY21730.1|GH1	ODP-AF04-71	GH	GH1	Strep. salivarius
contig_2_169	AOG60880.1|GH32	ODP-AF04-71	GH	GH32	Strep. salivarius
contig_2_170	QEM31996.1|GH32	ODP-AF04-71	GH	GH32	Strep. salivarius
contig_2_189	CCO11994.2|GT4	ODP-AF04-71	GT	GT4	Strep. salivarius
contig_2_208	AEJ52649.1|CBM50	ODP-AF04-71	CBM	CBM50	Strep. salivarius
contig_3_65	CCO11681.2|GH25	ODP-AF04-71	GH	GH25	Strep. salivarius
contig_3_79	SQF75631.1|GH2	ODP-AF04-71	GH	GH2	Strep. salivarius
contig_3_80	AUH38424.1|GH42	ODP-AF04-71	GH	GH42	Strep. salivarius
contig_3_82	ADN17640.1|GT2	ODP-AF04-71	GT	GT2	Strep. salivarius
contig_3_86	QEM32976.1|GH13_31	ODP-AF04-71	GH	GH13_31	Strep. salivarius
contig_3_109	QMI51308.1|GH70	ODP-AF04-71	GH	GH70	Strep. salivarius
contig_3_111	AAE35922.1|GH70|2.4.1.5	ODP-AF04-71	GH	GH70	Strep. salivarius
contig_3_112	QEM33005.1|GH70	ODP-AF04-71	GH	GH70	Strep. salivarius
contig_3_132	AAC41412.1|GH70|2.4.1.5	ODP-AF04-71	GH	GH70	Strep. salivarius
contig_4_24	CAG7911095.1|GH5_11	ODP-AF04-71	GH	GH5_11	Strep. salivarius
contig_4_56	QUI22575.1|CBM50	ODP-AF04-71	CBM	CBM50	Strep. salivarius
contig_4_65	CCO12633.2|GH84	ODP-AF04-71	GH	GH84	Strep. salivarius
contig_4_71	QGU82116.1|CBM50	ODP-AF04-71	CBM	CBM50	Strep. salivarius
contig_4_85	BBF72686.1|GT2	ODP-AF04-71	GT	GT2	Strep. salivarius
contig_4_98	QEM33224.1|GT8	ODP-AF04-71	GT	GT8	Strep. salivarius
contig_4_99	QEM33225.1|GT4	ODP-AF04-71	GT	GT4	Strep. salivarius
contig_4_130	CCO11054.2|CBM50	ODP-AF04-71	CBM	CBM50	Strep. salivarius
contig_5_44	CCO11632.2|GH3	ODP-AF04-71	GH	GH3	Strep. salivarius
contig_5_57	ARI60278.1|GH70|2.4.1.5	ODP-AF04-71	GH	GH70	Strep. salivarius
contig_5_58	QGU78753.1|GH70	ODP-AF04-71	GH	GH70	Strep. salivarius
contig_5_59	QEM32528.1|GH70	ODP-AF04-71	GH	GH70	Strep. salivarius
contig_5_60	QEM32527.1|GT2	ODP-AF04-71	GT	GT2	Strep. salivarius
contig_5_77	BBD21966.1|GT2	ODP-AF04-71	GT	GT2	Strep. salivarius
contig_5_87	QAY63367.1|GT2	ODP-AF04-71	GT	GT2	Strep. salivarius
contig_6_12	QEM33366.1|GT51	ODP-AF04-71	GT	GT51	Strep. salivarius
contig_6_27	CUS04921.2|GT4	ODP-AF04-71	GT	GT4	Strep. salivarius
contig_6_34	QGU77907.1|GT51	ODP-AF04-71	GT	GT51	Strep. salivarius
contig_6_39	QYO62262.1|GH13	ODP-AF04-71	GH	GH13	Strep. salivarius
contig_6_43	AGL64353.2|CBM50|GH25	ODP-AF04-71	CBM	CBM50	Strep. salivarius
contig_6_43	AGL64353.2|CBM50|GH25	ODP-AF04-71	GH	GH25	Strep. salivarius
contig_6_94	SQF74993.1|GH66	ODP-AF04-71	GH	GH66	Strep. salivarius
contig_7_47	QEM32424.1|CBM50	ODP-AF04-71	CBM	CBM50	Strep. salivarius
contig_7_52	QGU82918.1|GH25	ODP-AF04-71	GH	GH25	Strep. salivarius
contig_7_70	SQF76210.1|GH87	ODP-AF04-71	GH	GH87	Strep. salivarius
contig_7_93	ARI60345.1|GT28	ODP-AF04-71	GT	GT28	Strep. salivarius
contig_8_10	SQF75520.1|GT35	ODP-AF04-71	GT	GT35	Strep. salivarius
contig_8_11	QEM33065.1|GT5	ODP-AF04-71	GT	GT5	Strep. salivarius
contig_8_13	BBM21727.1|GH13_9	ODP-AF04-71	GH	GH13_9	Strep. salivarius
contig_8_14	QGU78229.1|CBM48|GH13_9	ODP-AF04-71	CBM	CBM48	Strep. salivarius
contig_8_14	QGU78229.1|CBM48|GH13_9	ODP-AF04-71	GH	GH13_9	Strep. salivarius
contig_8_15	QEM33069.1|CBM41|CBM48|GH13_14	ODP-AF04-71	CBM	CBM41	Strep. salivarius
contig_8_15	QEM33069.1|CBM41|CBM48|GH13_14	ODP-AF04-71	CBM	CBM48	Strep. salivarius
contig_8_15	QEM33069.1|CBM41|CBM48|GH13_14	ODP-AF04-71	GH	GH13_14	Strep. salivarius
contig_8_16	AGL63871.2|GT2	ODP-AF04-71	GT	GT2	Strep. salivarius
contig_8_28	ALR09732.2|GH92	ODP-AF04-71	GH	GH92	Strep. salivarius
contig_8_54	SQF25488.1|GT0	ODP-AF04-71	GT	GT0	Strep. salivarius
contig_8_57	CCB92856.1|GT2	ODP-AF04-71	GT	GT2	Strep. salivarius
contig_8_58	CCB92855.1|GT4	ODP-AF04-71	GT	GT4	Strep. salivarius
contig_8_60	QEM33113.1|GT4	ODP-AF04-71	GT	GT4	Strep. salivarius
contig_8_62	CCB92851.1|GT2|GT4	ODP-AF04-71	GT	GT2	Strep. salivarius
contig_8_62	CCB92851.1|GT2|GT4	ODP-AF04-71	GT	GT4	Strep. salivarius
contig_9_1	SQF76967.1|CBM50	ODP-AF04-71	CBM	CBM50	Strep. salivarius
contig_9_2	AEJ52449.1|GH23	ODP-AF04-71	GH	GH23	Strep. salivarius
contig_9_27	QMI51832.1|GH73	ODP-AF04-71	GH	GH73	Strep. salivarius
contig_9_58	ALR08738.2|GT83	ODP-AF04-71	GT	GT83	Strep. salivarius
contig_9_78	CAN80640.1|GT47	ODP-AF04-71	GT	GT47	Strep. salivarius
contig_10_41	QXF33454.1|GH13_3	ODP-AF04-71	GH	GH13_3	Strep. salivarius
contig_10_46	ARI60575.1|CE9	ODP-AF04-71	CE	CE9	Strep. salivarius
contig_10_51	ARI58749.1|GH73	ODP-AF04-71	GH	GH73	Strep. salivarius
contig_10_65	CAD7245033.1|GT58	ODP-AF04-71	GT	GT58	Strep. salivarius
contig_11_1	SQF76278.1|GT2|GT8	ODP-AF04-71	GT	GT2	Strep. salivarius
contig_11_1	SQF76278.1|GT2|GT8	ODP-AF04-71	GT	GT8	Strep. salivarius
contig_11_37	CCO09729.2|GH1	ODP-AF04-71	GH	GH1	Strep. salivarius
contig_11_48	CCO12112.2|GH13_31	ODP-AF04-71	GH	GH13_31	Strep. salivarius
contig_11_78	AGL63717.2|GT4	ODP-AF04-71	GT	GT4	Strep. salivarius
contig_12_21	CAI32748.2|GT4	ODP-AF04-71	GT	GT4	Strep. salivarius
contig_12_54	CCO12868.2|GH1	ODP-AF04-71	GH	GH1	Strep. salivarius
contig_12_56	ARC23275.1|GT51	ODP-AF04-71	GT	GT51	Strep. salivarius
contig_12_61	WAO96723.1|GH0	ODP-AF04-71	GH	GH0	Strep. salivarius
contig_12_70	SQF76856.1|GH13_29	ODP-AF04-71	GH	GH13_29	Strep. salivarius
contig_12_71	QCH95999.1|GH13_29	ODP-AF04-71	GH	GH13_29	Strep. salivarius
contig_13_69	AGL64345.2|GT2	ODP-AF04-71	GT	GT2	Strep. salivarius
contig_13_74	QBQ55251.1|CBM50	ODP-AF04-71	CBM	CBM50	Strep. salivarius
contig_14_13	QBQ55251.1|CBM50	ODP-AF04-71	CBM	CBM50	Strep. salivarius
contig_14_24	ARI60189.1|GH73	ODP-AF04-71	GH	GH73	Strep. salivarius
contig_14_37	AEJ53493.1|GH73	ODP-AF04-71	GH	GH73	Strep. salivarius
contig_14_38	QEM32671.1|CBM41|CBM48|GH13_12	ODP-AF04-71	CBM	CBM41	Strep. salivarius
contig_14_38	QEM32671.1|CBM41|CBM48|GH13_12	ODP-AF04-71	CBM	CBM48	Strep. salivarius
contig_14_38	QEM32671.1|CBM41|CBM48|GH13_12	ODP-AF04-71	GH	GH13_12	Strep. salivarius
contig_14_53	QGU82617.1|GH77	ODP-AF04-71	GH	GH77	Strep. salivarius
contig_14_54	AEJ53414.1|GT35	ODP-AF04-71	GT	GT35	Strep. salivarius
contig_15_5	AGL63702.2|GT4	ODP-AF04-71	GT	GT4	Strep. salivarius
contig_15_12	AIY21653.1|CE4	ODP-AF04-71	CE	CE4	Strep. salivarius
contig_15_43	ARI58783.1|GH13_5	ODP-AF04-71	GH	GH13_5	Strep. salivarius
contig_16_7	ARI59740.1|GT2|GT8	ODP-AF04-71	GT	GT2	Strep. salivarius
contig_16_7	ARI59740.1|GT2|GT8	ODP-AF04-71	GT	GT8	Strep. salivarius
contig_16_8	QEM33046.1|GT8	ODP-AF04-71	GT	GT8	Strep. salivarius
contig_16_9	SQF75538.1|GT8	ODP-AF04-71	GT	GT8	Strep. salivarius
contig_16_10	AEJ53043.1|GT4	ODP-AF04-71	GT	GT4	Strep. salivarius
contig_16_11	SQF75540.1|GT8	ODP-AF04-71	GT	GT8	Strep. salivarius
contig_16_12	CCB92926.1|GT113	ODP-AF04-71	GT	GT113	Strep. salivarius
contig_16_13	QGU82276.1|GT8	ODP-AF04-71	GT	GT8	Strep. salivarius
contig_16_14	CCB92928.1|GT2	ODP-AF04-71	GT	GT2	Strep. salivarius
contig_16_15	QEM33039.1|GT101|GT8	ODP-AF04-71	GT	GT101	Strep. salivarius
contig_16_15	QEM33039.1|GT101|GT8	ODP-AF04-71	GT	GT8	Strep. salivarius
contig_16_16	ARI59747.1|GT8	ODP-AF04-71	GT	GT8	Strep. salivarius
contig_17_26	CAN65674.1|GH28	ODP-AF04-71	GH	GH28	Strep. salivarius
contig_17_27	ARI57675.1|GT4	ODP-AF04-71	GT	GT4	Strep. salivarius
contig_17_28	SQF76383.1|GT4	ODP-AF04-71	GT	GT4	Strep. salivarius
contig_18_9	ARI59334.1|GH73	ODP-AF04-71	GH	GH73	Strep. salivarius
contig_18_28	CAE6076421.1|GH27	ODP-AF04-71	GH	GH27	Strep. salivarius
contig_18_32	CAD7252417.1|GH13	ODP-AF04-71	GH	GH13	Strep. salivarius
contig_18_35	AGL63717.2|GT4	ODP-AF04-71	GT	GT4	Strep. salivarius
contig_19_9	CCO12102.2|GH13_31	ODP-AF04-71	GH	GH13_31	Strep. salivarius
contig_19_11	QYU66396.1|GH13_23	ODP-AF04-71	GH	GH13_23	Strep. salivarius
contig_19_27	CUS05224.2|CE14	ODP-AF04-71	CE	CE14	Strep. salivarius
contig_20_2	AEJ52969.1|GT2	ODP-AF04-71	GT	GT2	Strep. salivarius
contig_20_4	QBS00312.1|GT2	ODP-AF04-71	GT	GT2	Strep. salivarius
contig_20_5	AEJ52966.1|GT2	ODP-AF04-71	GT	GT2	Strep. salivarius
contig_20_9	AEJ52962.1|GT2	ODP-AF04-71	GT	GT2	Strep. salivarius
contig_21_1	QGU78609.1|GH25	ODP-AF04-71	GH	GH25	Strep. salivarius
contig_21_18	QEM32654.1|GH1	ODP-AF04-71	GH	GH1	Strep. salivarius
contig_22_8	QTF54836.1|GT0	ODP-AF04-71	GT	GT0	Strep. salivarius
contig_22_9	QEM32646.1|GT2	ODP-AF04-71	GT	GT2	Strep. salivarius
contig_22_11	QEM32645.1|GT4	ODP-AF04-71	GT	GT4	Strep. salivarius
contig_22_12	QEM32644.1|GT2	ODP-AF04-71	GT	GT2	Strep. salivarius
contig_22_14	QGU82661.1|GT26	ODP-AF04-71	GT	GT26	Strep. salivarius
contig_24_10	CCO10293.2|CBM50	ODP-AF04-71	CBM	CBM50	Strep. salivarius
contig_24_16	QEM33273.1|GH68	ODP-AF04-71	GH	GH68	Strep. salivarius
contig_24_17	QEM33274.1|GH32	ODP-AF04-71	GH	GH32	Strep. salivarius
contig_26_11	WJM08831.1|CBM50	ODP-AF04-71	CBM	CBM50	Strep. salivarius
contig_27_2	CAD7226128.1|GH38	ODP-AF04-71	GH	GH38	Strep. salivarius
contig_30_5	CCB93441.1|GH8	ODP-AF04-71	GH	GH8	Strep. salivarius
contig_30_6	QEM32588.1|GT2	ODP-AF04-71	GT	GT2	Strep. salivarius
contig_30_9	WEA13229.1|GT0	ODP-AF04-71	GT	GT0	Strep. salivarius
contig_45_1	QGU78609.1|GH25	ODP-AF04-71	GH	GH25	Strep. salivarius
contig_1_2	QGU82405.1|CBM66|GH32	ODP-AF04-87	CBM	CBM66	Strep. salivarius
contig_1_2	QGU82405.1|CBM66|GH32	ODP-AF04-87	GH	GH32	Strep. salivarius
contig_1_44	AGL64700.2|GH23	ODP-AF04-87	GH	GH23	Strep. salivarius
contig_1_48	AMJ20543.1|GH13_11	ODP-AF04-87	GH	GH13_11	Strep. salivarius
contig_1_50	SQF75762.1|GH23	ODP-AF04-87	GH	GH23	Strep. salivarius
contig_1_62	BEI59196.1|GH130_1	ODP-AF04-87	GH	GH130_1	Strep. salivarius
contig_1_103	AEJ53294.1|GH73	ODP-AF04-87	GH	GH73	Strep. salivarius
contig_1_148	CAE6204650.1|GH28	ODP-AF04-87	GH	GH28	Strep. salivarius
contig_1_176	AGL64020.2|AA10	ODP-AF04-87	AA	AA10	Strep. salivarius
contig_2_6	AEJ52649.1|CBM50	ODP-AF04-87	CBM	CBM50	Strep. salivarius
contig_2_25	CCO11994.2|GT4	ODP-AF04-87	GT	GT4	Strep. salivarius
contig_2_44	QEM31996.1|GH32	ODP-AF04-87	GH	GH32	Strep. salivarius
contig_2_45	AOG60880.1|GH32	ODP-AF04-87	GH	GH32	Strep. salivarius
contig_2_147	AIY21730.1|GH1	ODP-AF04-87	GH	GH1	Strep. salivarius
contig_2_153	CCB94001.1|GH1	ODP-AF04-87	GH	GH1	Strep. salivarius
contig_2_171	AGL63717.2|GT4	ODP-AF04-87	GT	GT4	Strep. salivarius
contig_2_182	WAO96723.1|GH0	ODP-AF04-87	GH	GH0	Strep. salivarius
contig_3_65	CCO11681.2|GH25	ODP-AF04-87	GH	GH25	Strep. salivarius
contig_3_79	SQF75631.1|GH2	ODP-AF04-87	GH	GH2	Strep. salivarius
contig_3_80	AUH38424.1|GH42	ODP-AF04-87	GH	GH42	Strep. salivarius
contig_3_82	ADN17640.1|GT2	ODP-AF04-87	GT	GT2	Strep. salivarius
contig_3_86	QEM32976.1|GH13_31	ODP-AF04-87	GH	GH13_31	Strep. salivarius
contig_3_109	QMI51308.1|GH70	ODP-AF04-87	GH	GH70	Strep. salivarius
contig_3_111	AAE35922.1|GH70|2.4.1.5	ODP-AF04-87	GH	GH70	Strep. salivarius
contig_3_112	QEM33005.1|GH70	ODP-AF04-87	GH	GH70	Strep. salivarius
contig_3_132	AAC41412.1|GH70|2.4.1.5	ODP-AF04-87	GH	GH70	Strep. salivarius
contig_4_9	ARI59747.1|GT8	ODP-AF04-87	GT	GT8	Strep. salivarius
contig_4_10	QEM33039.1|GT101|GT8	ODP-AF04-87	GT	GT101	Strep. salivarius
contig_4_10	QEM33039.1|GT101|GT8	ODP-AF04-87	GT	GT8	Strep. salivarius
contig_4_11	CCB92928.1|GT2	ODP-AF04-87	GT	GT2	Strep. salivarius
contig_4_12	QGU82276.1|GT8	ODP-AF04-87	GT	GT8	Strep. salivarius
contig_4_13	CCB92926.1|GT113	ODP-AF04-87	GT	GT113	Strep. salivarius
contig_4_14	SQF75540.1|GT8	ODP-AF04-87	GT	GT8	Strep. salivarius
contig_4_15	AEJ53043.1|GT4	ODP-AF04-87	GT	GT4	Strep. salivarius
contig_4_16	SQF75538.1|GT8	ODP-AF04-87	GT	GT8	Strep. salivarius
contig_4_17	QEM33046.1|GT8	ODP-AF04-87	GT	GT8	Strep. salivarius
contig_4_18	ARI59740.1|GT2|GT8	ODP-AF04-87	GT	GT2	Strep. salivarius
contig_4_18	ARI59740.1|GT2|GT8	ODP-AF04-87	GT	GT8	Strep. salivarius
contig_4_33	SQF75520.1|GT35	ODP-AF04-87	GT	GT35	Strep. salivarius
contig_4_34	QEM33065.1|GT5	ODP-AF04-87	GT	GT5	Strep. salivarius
contig_4_36	BBM21727.1|GH13_9	ODP-AF04-87	GH	GH13_9	Strep. salivarius
contig_4_37	QGU78229.1|CBM48|GH13_9	ODP-AF04-87	CBM	CBM48	Strep. salivarius
contig_4_37	QGU78229.1|CBM48|GH13_9	ODP-AF04-87	GH	GH13_9	Strep. salivarius
contig_4_38	QEM33069.1|CBM41|CBM48|GH13_14	ODP-AF04-87	CBM	CBM41	Strep. salivarius
contig_4_38	QEM33069.1|CBM41|CBM48|GH13_14	ODP-AF04-87	CBM	CBM48	Strep. salivarius
contig_4_38	QEM33069.1|CBM41|CBM48|GH13_14	ODP-AF04-87	GH	GH13_14	Strep. salivarius
contig_4_39	AGL63871.2|GT2	ODP-AF04-87	GT	GT2	Strep. salivarius
contig_4_51	ALR09732.2|GH92	ODP-AF04-87	GH	GH92	Strep. salivarius
contig_4_77	SQF25488.1|GT0	ODP-AF04-87	GT	GT0	Strep. salivarius
contig_4_80	CCB92856.1|GT2	ODP-AF04-87	GT	GT2	Strep. salivarius
contig_4_81	CCB92855.1|GT4	ODP-AF04-87	GT	GT4	Strep. salivarius
contig_4_83	QEM33113.1|GT4	ODP-AF04-87	GT	GT4	Strep. salivarius
contig_4_85	CCB92851.1|GT2|GT4	ODP-AF04-87	GT	GT2	Strep. salivarius
contig_4_85	CCB92851.1|GT2|GT4	ODP-AF04-87	GT	GT4	Strep. salivarius
contig_5_24	CAG7911095.1|GH5_11	ODP-AF04-87	GH	GH5_11	Strep. salivarius
contig_5_56	QUI22575.1|CBM50	ODP-AF04-87	CBM	CBM50	Strep. salivarius
contig_5_65	CCO12633.2|GH84	ODP-AF04-87	GH	GH84	Strep. salivarius
contig_5_71	QGU82116.1|CBM50	ODP-AF04-87	CBM	CBM50	Strep. salivarius
contig_5_85	BBF72686.1|GT2	ODP-AF04-87	GT	GT2	Strep. salivarius
contig_5_98	QEM33224.1|GT8	ODP-AF04-87	GT	GT8	Strep. salivarius
contig_5_99	QEM33225.1|GT4	ODP-AF04-87	GT	GT4	Strep. salivarius
contig_5_130	CCO11054.2|CBM50	ODP-AF04-87	CBM	CBM50	Strep. salivarius
contig_6_44	CCO11632.2|GH3	ODP-AF04-87	GH	GH3	Strep. salivarius
contig_6_57	ARI60278.1|GH70|2.4.1.5	ODP-AF04-87	GH	GH70	Strep. salivarius
contig_6_58	QGU78753.1|GH70	ODP-AF04-87	GH	GH70	Strep. salivarius
contig_6_59	QEM32528.1|GH70	ODP-AF04-87	GH	GH70	Strep. salivarius
contig_6_60	QEM32527.1|GT2	ODP-AF04-87	GT	GT2	Strep. salivarius
contig_6_77	BBD21966.1|GT2	ODP-AF04-87	GT	GT2	Strep. salivarius
contig_6_87	QAY63367.1|GT2	ODP-AF04-87	GT	GT2	Strep. salivarius
contig_7_12	QEM33366.1|GT51	ODP-AF04-87	GT	GT51	Strep. salivarius
contig_7_27	CUS04921.2|GT4	ODP-AF04-87	GT	GT4	Strep. salivarius
contig_7_34	QGU77907.1|GT51	ODP-AF04-87	GT	GT51	Strep. salivarius
contig_7_39	QYO62262.1|GH13	ODP-AF04-87	GH	GH13	Strep. salivarius
contig_7_43	AGL64353.2|CBM50|GH25	ODP-AF04-87	CBM	CBM50	Strep. salivarius
contig_7_43	AGL64353.2|CBM50|GH25	ODP-AF04-87	GH	GH25	Strep. salivarius
contig_7_94	SQF74993.1|GH66	ODP-AF04-87	GH	GH66	Strep. salivarius
contig_8_10	ARI60345.1|GT28	ODP-AF04-87	GT	GT28	Strep. salivarius
contig_8_32	SQF76210.1|GH87	ODP-AF04-87	GH	GH87	Strep. salivarius
contig_8_50	QGU82918.1|GH25	ODP-AF04-87	GH	GH25	Strep. salivarius
contig_8_55	QEM32424.1|CBM50	ODP-AF04-87	CBM	CBM50	Strep. salivarius
contig_9_1	SQF76967.1|CBM50	ODP-AF04-87	CBM	CBM50	Strep. salivarius
contig_9_2	AEJ52449.1|GH23	ODP-AF04-87	GH	GH23	Strep. salivarius
contig_9_27	QMI51832.1|GH73	ODP-AF04-87	GH	GH73	Strep. salivarius
contig_9_57	ALR08738.2|GT83	ODP-AF04-87	GT	GT83	Strep. salivarius
contig_9_77	CAN80640.1|GT47	ODP-AF04-87	GT	GT47	Strep. salivarius
contig_10_41	QXF33454.1|GH13_3	ODP-AF04-87	GH	GH13_3	Strep. salivarius
contig_10_46	ARI60575.1|CE9	ODP-AF04-87	CE	CE9	Strep. salivarius
contig_10_51	ARI58749.1|GH73	ODP-AF04-87	GH	GH73	Strep. salivarius
contig_10_65	CAD7245033.1|GT58	ODP-AF04-87	GT	GT58	Strep. salivarius
contig_11_1	SQF76278.1|GT2|GT8	ODP-AF04-87	GT	GT2	Strep. salivarius
contig_11_1	SQF76278.1|GT2|GT8	ODP-AF04-87	GT	GT8	Strep. salivarius
contig_11_37	CCO09729.2|GH1	ODP-AF04-87	GH	GH1	Strep. salivarius
contig_11_48	CCO12112.2|GH13_31	ODP-AF04-87	GH	GH13_31	Strep. salivarius
contig_11_78	AGL63717.2|GT4	ODP-AF04-87	GT	GT4	Strep. salivarius
contig_12_21	CAI32748.2|GT4	ODP-AF04-87	GT	GT4	Strep. salivarius
contig_12_54	CCO12868.2|GH1	ODP-AF04-87	GH	GH1	Strep. salivarius
contig_12_56	ARC23275.1|GT51	ODP-AF04-87	GT	GT51	Strep. salivarius
contig_12_61	WAO96723.1|GH0	ODP-AF04-87	GH	GH0	Strep. salivarius
contig_12_70	SQF76856.1|GH13_29	ODP-AF04-87	GH	GH13_29	Strep. salivarius
contig_12_71	QCH95999.1|GH13_29	ODP-AF04-87	GH	GH13_29	Strep. salivarius
contig_13_3	QBQ55251.1|CBM50	ODP-AF04-87	CBM	CBM50	Strep. salivarius
contig_13_8	AGL64345.2|GT2	ODP-AF04-87	GT	GT2	Strep. salivarius
contig_14_8	ARI58783.1|GH13_5	ODP-AF04-87	GH	GH13_5	Strep. salivarius
contig_14_39	AIY21653.1|CE4	ODP-AF04-87	CE	CE4	Strep. salivarius
contig_14_46	AGL63702.2|GT4	ODP-AF04-87	GT	GT4	Strep. salivarius
contig_15_2	QEM32654.1|GH1	ODP-AF04-87	GH	GH1	Strep. salivarius
contig_15_19	QGU78609.1|GH25	ODP-AF04-87	GH	GH25	Strep. salivarius
contig_15_20	SQF75952.1|GH25	ODP-AF04-87	GH	GH25	Strep. salivarius
contig_15_21	QEM32671.1|CBM41|CBM48|GH13_12	ODP-AF04-87	CBM	CBM41	Strep. salivarius
contig_15_21	QEM32671.1|CBM41|CBM48|GH13_12	ODP-AF04-87	CBM	CBM48	Strep. salivarius
contig_15_21	QEM32671.1|CBM41|CBM48|GH13_12	ODP-AF04-87	GH	GH13_12	Strep. salivarius
contig_15_36	QGU82617.1|GH77	ODP-AF04-87	GH	GH77	Strep. salivarius
contig_15_37	AEJ53414.1|GT35	ODP-AF04-87	GT	GT35	Strep. salivarius
contig_16_26	CAN65674.1|GH28	ODP-AF04-87	GH	GH28	Strep. salivarius
contig_16_27	ARI57675.1|GT4	ODP-AF04-87	GT	GT4	Strep. salivarius
contig_16_28	SQF76383.1|GT4	ODP-AF04-87	GT	GT4	Strep. salivarius
contig_17_9	ARI59334.1|GH73	ODP-AF04-87	GH	GH73	Strep. salivarius
contig_17_28	CAE6076421.1|GH27	ODP-AF04-87	GH	GH27	Strep. salivarius
contig_17_32	CAD7252417.1|GH13	ODP-AF04-87	GH	GH13	Strep. salivarius
contig_17_35	AGL63717.2|GT4	ODP-AF04-87	GT	GT4	Strep. salivarius
contig_18_6	CUS05224.2|CE14	ODP-AF04-87	CE	CE14	Strep. salivarius
contig_18_22	QYU66396.1|GH13_23	ODP-AF04-87	GH	GH13_23	Strep. salivarius
contig_18_24	CCO12102.2|GH13_31	ODP-AF04-87	GH	GH13_31	Strep. salivarius
contig_19_13	QBQ55251.1|CBM50	ODP-AF04-87	CBM	CBM50	Strep. salivarius
contig_19_24	ARI60189.1|GH73	ODP-AF04-87	GH	GH73	Strep. salivarius
contig_19_25	ARI60189.1|GH73	ODP-AF04-87	GH	GH73	Strep. salivarius
contig_20_1	AEJ52969.1|GT2	ODP-AF04-87	GT	GT2	Strep. salivarius
contig_20_3	QBS00312.1|GT2	ODP-AF04-87	GT	GT2	Strep. salivarius
contig_20_4	AEJ52966.1|GT2	ODP-AF04-87	GT	GT2	Strep. salivarius
contig_20_8	AEJ52962.1|GT2	ODP-AF04-87	GT	GT2	Strep. salivarius
contig_21_8	QTF54836.1|GT0	ODP-AF04-87	GT	GT0	Strep. salivarius
contig_21_9	QEM32646.1|GT2	ODP-AF04-87	GT	GT2	Strep. salivarius
contig_21_11	QEM32645.1|GT4	ODP-AF04-87	GT	GT4	Strep. salivarius
contig_21_12	QEM32644.1|GT2	ODP-AF04-87	GT	GT2	Strep. salivarius
contig_21_14	QGU82661.1|GT26	ODP-AF04-87	GT	GT26	Strep. salivarius
contig_23_10	CCO10293.2|CBM50	ODP-AF04-87	CBM	CBM50	Strep. salivarius
contig_23_16	QEM33273.1|GH68	ODP-AF04-87	GH	GH68	Strep. salivarius
contig_23_17	QEM33274.1|GH32	ODP-AF04-87	GH	GH32	Strep. salivarius
contig_25_11	WJM08831.1|CBM50	ODP-AF04-87	CBM	CBM50	Strep. salivarius
contig_26_2	CAD7226128.1|GH38	ODP-AF04-87	GH	GH38	Strep. salivarius
contig_28_5	CCB93441.1|GH8	ODP-AF04-87	GH	GH8	Strep. salivarius
contig_28_6	QEM32588.1|GT2	ODP-AF04-87	GT	GT2	Strep. salivarius
contig_28_9	WEA13229.1|GT0	ODP-AF04-87	GT	GT0	Strep. salivarius
contig_1_10	QEM33064.1|GT35	ODP-AF04-91	GT	GT35	Strep. salivarius
contig_1_11	ARI59723.1|GT5	ODP-AF04-91	GT	GT5	Strep. salivarius
contig_1_13	BBM21727.1|GH13_9	ODP-AF04-91	GH	GH13_9	Strep. salivarius
contig_1_14	QGU78229.1|CBM48|GH13_9	ODP-AF04-91	CBM	CBM48	Strep. salivarius
contig_1_14	QGU78229.1|CBM48|GH13_9	ODP-AF04-91	GH	GH13_9	Strep. salivarius
contig_1_15	QEM33069.1|CBM41|CBM48|GH13_14	ODP-AF04-91	CBM	CBM41	Strep. salivarius
contig_1_15	QEM33069.1|CBM41|CBM48|GH13_14	ODP-AF04-91	CBM	CBM48	Strep. salivarius
contig_1_15	QEM33069.1|CBM41|CBM48|GH13_14	ODP-AF04-91	GH	GH13_14	Strep. salivarius
contig_1_16	AGL63871.2|GT2	ODP-AF04-91	GT	GT2	Strep. salivarius
contig_1_28	ALR09732.2|GH92	ODP-AF04-91	GH	GH92	Strep. salivarius
contig_1_56	QGU82211.1|GT2	ODP-AF04-91	GT	GT2	Strep. salivarius
contig_1_57	SQF25488.1|GT0	ODP-AF04-91	GT	GT0	Strep. salivarius
contig_1_58	QGU78188.1|GT2	ODP-AF04-91	GT	GT2	Strep. salivarius
contig_1_61	AMB83189.1|GT2	ODP-AF04-91	GT	GT2	Strep. salivarius
contig_1_62	AMB83190.1|GT4	ODP-AF04-91	GT	GT4	Strep. salivarius
contig_1_64	QGU78182.1|GT2	ODP-AF04-91	GT	GT2	Strep. salivarius
contig_1_97	CAG7911095.1|GH5_11	ODP-AF04-91	GH	GH5_11	Strep. salivarius
contig_1_161	QAY63367.1|GT2	ODP-AF04-91	GT	GT2	Strep. salivarius
contig_2_10	CCO10293.2|CBM50	ODP-AF04-91	CBM	CBM50	Strep. salivarius
contig_2_16	QEM33273.1|GH68	ODP-AF04-91	GH	GH68	Strep. salivarius
contig_2_17	ARI59518.1|GH32	ODP-AF04-91	GH	GH32	Strep. salivarius
contig_2_20	QBQ55251.1|CBM50	ODP-AF04-91	CBM	CBM50	Strep. salivarius
contig_2_25	AGL64345.2|GT2	ODP-AF04-91	GT	GT2	Strep. salivarius
contig_2_115	QEM33366.1|GT51	ODP-AF04-91	GT	GT51	Strep. salivarius
contig_2_130	CUS04921.2|GT4	ODP-AF04-91	GT	GT4	Strep. salivarius
contig_2_137	VED87219.1|GT51	ODP-AF04-91	GT	GT51	Strep. salivarius
contig_2_142	QYO62262.1|GH13	ODP-AF04-91	GH	GH13	Strep. salivarius
contig_2_146	AGL64353.2|CBM50|GH25	ODP-AF04-91	CBM	CBM50	Strep. salivarius
contig_2_146	AGL64353.2|CBM50|GH25	ODP-AF04-91	GH	GH25	Strep. salivarius
contig_3_32	CAE6204650.1|GH28	ODP-AF04-91	GH	GH28	Strep. salivarius
contig_3_70	AGL64020.2|AA10	ODP-AF04-91	AA	AA10	Strep. salivarius
contig_3_116	QKH69755.1|GT35	ODP-AF04-91	GT	GT35	Strep. salivarius
contig_3_117	QEM32684.1|GH77	ODP-AF04-91	GH	GH77	Strep. salivarius
contig_4_34	AGL64700.2|GH23	ODP-AF04-91	GH	GH23	Strep. salivarius
contig_4_37	AMJ20543.1|GH13_11	ODP-AF04-91	GH	GH13_11	Strep. salivarius
contig_4_39	QKH69912.1|GH23	ODP-AF04-91	GH	GH23	Strep. salivarius
contig_4_51	BEI59196.1|GH130_1	ODP-AF04-91	GH	GH130_1	Strep. salivarius
contig_4_91	QEM32801.1|GH73	ODP-AF04-91	GH	GH73	Strep. salivarius
contig_5_6	AGL63717.2|GT4	ODP-AF04-91	GT	GT4	Strep. salivarius
contig_5_17	WAO96723.1|GH0	ODP-AF04-91	GH	GH0	Strep. salivarius
contig_5_56	AGL63702.2|GT4	ODP-AF04-91	GT	GT4	Strep. salivarius
contig_5_65	ARC34731.1|CE4	ODP-AF04-91	CE	CE4	Strep. salivarius
contig_5_96	UOT91118.1|GH13_5	ODP-AF04-91	GH	GH13_5	Strep. salivarius
contig_6_4	QEM33029.1|GH70	ODP-AF04-91	GH	GH70	Strep. salivarius
contig_6_23	AEJ53086.1|GH70	ODP-AF04-91	GH	GH70	Strep. salivarius
contig_6_24	AAE35922.1|GH70|2.4.1.5	ODP-AF04-91	GH	GH70	Strep. salivarius
contig_6_35	ARI59786.1|GH70	ODP-AF04-91	GH	GH70	Strep. salivarius
contig_7_41	CCO11632.2|GH3	ODP-AF04-91	GH	GH3	Strep. salivarius
contig_7_55	QEM32530.1|GH70	ODP-AF04-91	GH	GH70	Strep. salivarius
contig_7_56	CCB93509.1|GH70	ODP-AF04-91	GH	GH70	Strep. salivarius
contig_7_57	QEM32528.1|GH70	ODP-AF04-91	GH	GH70	Strep. salivarius
contig_7_58	QEM32527.1|GT2	ODP-AF04-91	GT	GT2	Strep. salivarius
contig_7_74	BBD21966.1|GT2	ODP-AF04-91	GT	GT2	Strep. salivarius
contig_8_68	AOG60880.1|GH32	ODP-AF04-91	GH	GH32	Strep. salivarius
contig_8_69	CCB96107.1|GH32	ODP-AF04-91	GH	GH32	Strep. salivarius
contig_9_20	CAN65674.1|GH28	ODP-AF04-91	GH	GH28	Strep. salivarius
contig_9_21	SQF76382.1|GT4	ODP-AF04-91	GT	GT4	Strep. salivarius
contig_9_22	SQF76383.1|GT4	ODP-AF04-91	GT	GT4	Strep. salivarius
contig_10_2	CCB93675.1|GT2|GT8	ODP-AF04-91	GT	GT2	Strep. salivarius
contig_10_2	CCB93675.1|GT2|GT8	ODP-AF04-91	GT	GT8	Strep. salivarius
contig_10_32	CCO09729.2|GH1	ODP-AF04-91	GH	GH1	Strep. salivarius
contig_10_43	CCO12112.2|GH13_31	ODP-AF04-91	GH	GH13_31	Strep. salivarius
contig_11_12	QBQ55251.1|CBM50	ODP-AF04-91	CBM	CBM50	Strep. salivarius
contig_11_23	QEM32624.1|GH73	ODP-AF04-91	GH	GH73	Strep. salivarius
contig_11_41	QGU82661.1|GT26	ODP-AF04-91	GT	GT26	Strep. salivarius
contig_11_43	QEM32644.1|GT2	ODP-AF04-91	GT	GT2	Strep. salivarius
contig_11_44	QEM32645.1|GT4	ODP-AF04-91	GT	GT4	Strep. salivarius
contig_11_46	QEM32646.1|GT2	ODP-AF04-91	GT	GT2	Strep. salivarius
contig_11_47	QTF54836.1|GT0	ODP-AF04-91	GT	GT0	Strep. salivarius
contig_11_55	QEM32654.1|GH1	ODP-AF04-91	GH	GH1	Strep. salivarius
contig_13_35	AIY21730.1|GH1	ODP-AF04-91	GH	GH1	Strep. salivarius
contig_13_41	CCB94001.1|GH1	ODP-AF04-91	GH	GH1	Strep. salivarius
contig_14_2	CCB94255.1|GT51	ODP-AF04-91	GT	GT51	Strep. salivarius
contig_14_4	CCO12868.2|GH1	ODP-AF04-91	GH	GH1	Strep. salivarius
contig_14_38	CAI32748.2|GT4	ODP-AF04-91	GT	GT4	Strep. salivarius
contig_15_2	QGU78819.1|GT28	ODP-AF04-91	GT	GT28	Strep. salivarius
contig_15_24	QEM32444.1|GH87	ODP-AF04-91	GH	GH87	Strep. salivarius
contig_15_38	QEM32429.1|GH25	ODP-AF04-91	GH	GH25	Strep. salivarius
contig_15_43	QEM32424.1|CBM50	ODP-AF04-91	CBM	CBM50	Strep. salivarius
contig_16_8	ALR08738.2|GT83	ODP-AF04-91	GT	GT83	Strep. salivarius
contig_16_37	QMI51832.1|GH73	ODP-AF04-91	GH	GH73	Strep. salivarius
contig_17_4	BBF72686.1|GT2	ODP-AF04-91	GT	GT2	Strep. salivarius
contig_17_17	QEM33224.1|GT8	ODP-AF04-91	GT	GT8	Strep. salivarius
contig_17_18	QEM33225.1|GT4	ODP-AF04-91	GT	GT4	Strep. salivarius
contig_17_49	CCO11054.2|CBM50	ODP-AF04-91	CBM	CBM50	Strep. salivarius
contig_18_7	CUS05224.2|CE14	ODP-AF04-91	CE	CE14	Strep. salivarius
contig_18_26	QYU66396.1|GH13_23	ODP-AF04-91	GH	GH13_23	Strep. salivarius
contig_18_28	CCO12102.2|GH13_31	ODP-AF04-91	GH	GH13_31	Strep. salivarius
contig_19_8	ARI59740.1|GT2|GT8	ODP-AF04-91	GT	GT2	Strep. salivarius
contig_19_8	ARI59740.1|GT2|GT8	ODP-AF04-91	GT	GT8	Strep. salivarius
contig_19_9	QEM33046.1|GT8	ODP-AF04-91	GT	GT8	Strep. salivarius
contig_19_10	AEJ53042.1|GT8	ODP-AF04-91	GT	GT8	Strep. salivarius
contig_19_11	AEJ53043.1|GT4	ODP-AF04-91	GT	GT4	Strep. salivarius
contig_19_12	SQF75540.1|GT8	ODP-AF04-91	GT	GT8	Strep. salivarius
contig_19_13	QGU82275.1|GT113	ODP-AF04-91	GT	GT113	Strep. salivarius
contig_19_14	SQF75542.1|GT8	ODP-AF04-91	GT	GT8	Strep. salivarius
contig_19_15	QEM33040.1|GT2	ODP-AF04-91	GT	GT2	Strep. salivarius
contig_19_16	QEM33039.1|GT101|GT8	ODP-AF04-91	GT	GT101	Strep. salivarius
contig_19_16	QEM33039.1|GT101|GT8	ODP-AF04-91	GT	GT8	Strep. salivarius
contig_19_17	AEJ53050.1|GT8	ODP-AF04-91	GT	GT8	Strep. salivarius
contig_20_23	CAE6076421.1|GH27	ODP-AF04-91	GH	GH27	Strep. salivarius
contig_20_27	CAD7252417.1|GH13	ODP-AF04-91	GH	GH13	Strep. salivarius
contig_20_30	AGL63717.2|GT4	ODP-AF04-91	GT	GT4	Strep. salivarius
contig_21_8	QGU81881.1|GH66	ODP-AF04-91	GH	GH66	Strep. salivarius
contig_21_16	CCB93441.1|GH8	ODP-AF04-91	GH	GH8	Strep. salivarius
contig_21_17	QEM32588.1|GT2	ODP-AF04-91	GT	GT2	Strep. salivarius
contig_21_20	WEA13229.1|GT0	ODP-AF04-91	GT	GT0	Strep. salivarius
contig_21_23	WJM08831.1|CBM50	ODP-AF04-91	CBM	CBM50	Strep. salivarius
contig_22_7	QUI22575.1|CBM50	ODP-AF04-91	CBM	CBM50	Strep. salivarius
contig_22_16	CCO12633.2|GH84	ODP-AF04-91	GH	GH84	Strep. salivarius
contig_22_22	QGU82116.1|CBM50	ODP-AF04-91	CBM	CBM50	Strep. salivarius
contig_23_15	AMB83600.1|CBM50	ODP-AF04-91	CBM	CBM50	Strep. salivarius
contig_23_16	ARC23391.1|GH23	ODP-AF04-91	GH	GH23	Strep. salivarius
contig_24_14	QEM31908.1|CBM50	ODP-AF04-91	CBM	CBM50	Strep. salivarius
contig_24_21	CAD7226128.1|GH38	ODP-AF04-91	GH	GH38	Strep. salivarius
contig_26_1	CCB93012.1|GH13_31	ODP-AF04-91	GH	GH13_31	Strep. salivarius
contig_26_5	ADN17640.1|GT2	ODP-AF04-91	GT	GT2	Strep. salivarius
contig_26_7	AUH38424.1|GH42	ODP-AF04-91	GH	GH42	Strep. salivarius
contig_26_8	AEJ53119.1|GH2	ODP-AF04-91	GH	GH2	Strep. salivarius
contig_27_6	ALR80175.1|CBM66|GH32	ODP-AF04-91	CBM	CBM66	Strep. salivarius
contig_27_6	ALR80175.1|CBM66|GH32	ODP-AF04-91	GH	GH32	Strep. salivarius
contig_28_35	CAN80640.1|GT47	ODP-AF04-91	GT	GT47	Strep. salivarius
contig_29_4	WAO96723.1|GH0	ODP-AF04-91	GH	GH0	Strep. salivarius
contig_29_13	QMI51793.1|GH13_29	ODP-AF04-91	GH	GH13_29	Strep. salivarius
contig_29_14	CCB94270.1|GH13_29	ODP-AF04-91	GH	GH13_29	Strep. salivarius
contig_30_8	ARI58749.1|GH73	ODP-AF04-91	GH	GH73	Strep. salivarius
contig_30_13	QEM32220.1|CE9	ODP-AF04-91	CE	CE9	Strep. salivarius
contig_30_18	QXF33454.1|GH13_3	ODP-AF04-91	GH	GH13_3	Strep. salivarius
contig_31_7	CAD7245033.1|GT58	ODP-AF04-91	GT	GT58	Strep. salivarius
contig_32_6	CCO11994.2|GT4	ODP-AF04-91	GT	GT4	Strep. salivarius
contig_33_9	AIY20374.1|GH73	ODP-AF04-91	GH	GH73	Strep. salivarius
contig_36_3	AGL63717.2|GT4	ODP-AF04-91	GT	GT4	Strep. salivarius
contig_37_2	QGU78609.1|GH25	ODP-AF04-91	GH	GH25	Strep. salivarius
contig_40_2	QEM32670.1|GH25	ODP-AF04-91	GH	GH25	Strep. salivarius
contig_40_3	QGU78608.1|CBM41|CBM48|GH13_12	ODP-AF04-91	CBM	CBM41	Strep. salivarius
contig_40_3	QGU78608.1|CBM41|CBM48|GH13_12	ODP-AF04-91	CBM	CBM48	Strep. salivarius
contig_40_3	QGU78608.1|CBM41|CBM48|GH13_12	ODP-AF04-91	GH	GH13_12	Strep. salivarius
contig_1_10	CCO10293.2|CBM50	ODP-AF04-99	CBM	CBM50	Strep. salivarius
contig_1_16	QEM33273.1|GH68	ODP-AF04-99	GH	GH68	Strep. salivarius
contig_1_17	ARI59518.1|GH32	ODP-AF04-99	GH	GH32	Strep. salivarius
contig_1_20	QBQ55251.1|CBM50	ODP-AF04-99	CBM	CBM50	Strep. salivarius
contig_1_25	AGL64345.2|GT2	ODP-AF04-99	GT	GT2	Strep. salivarius
contig_1_115	QEM33366.1|GT51	ODP-AF04-99	GT	GT51	Strep. salivarius
contig_1_130	CUS04921.2|GT4	ODP-AF04-99	GT	GT4	Strep. salivarius
contig_1_137	VED87219.1|GT51	ODP-AF04-99	GT	GT51	Strep. salivarius
contig_1_142	QYO62262.1|GH13	ODP-AF04-99	GH	GH13	Strep. salivarius
contig_1_146	AGL64353.2|CBM50|GH25	ODP-AF04-99	CBM	CBM50	Strep. salivarius
contig_1_146	AGL64353.2|CBM50|GH25	ODP-AF04-99	GH	GH25	Strep. salivarius
contig_2_10	QEM33064.1|GT35	ODP-AF04-99	GT	GT35	Strep. salivarius
contig_2_11	ARI59723.1|GT5	ODP-AF04-99	GT	GT5	Strep. salivarius
contig_2_13	BBM21727.1|GH13_9	ODP-AF04-99	GH	GH13_9	Strep. salivarius
contig_2_14	QGU78229.1|CBM48|GH13_9	ODP-AF04-99	CBM	CBM48	Strep. salivarius
contig_2_14	QGU78229.1|CBM48|GH13_9	ODP-AF04-99	GH	GH13_9	Strep. salivarius
contig_2_15	QEM33069.1|CBM41|CBM48|GH13_14	ODP-AF04-99	CBM	CBM41	Strep. salivarius
contig_2_15	QEM33069.1|CBM41|CBM48|GH13_14	ODP-AF04-99	CBM	CBM48	Strep. salivarius
contig_2_15	QEM33069.1|CBM41|CBM48|GH13_14	ODP-AF04-99	GH	GH13_14	Strep. salivarius
contig_2_16	AGL63871.2|GT2	ODP-AF04-99	GT	GT2	Strep. salivarius
contig_2_28	ALR09732.2|GH92	ODP-AF04-99	GH	GH92	Strep. salivarius
contig_2_56	QGU82211.1|GT2	ODP-AF04-99	GT	GT2	Strep. salivarius
contig_2_57	SQF25488.1|GT0	ODP-AF04-99	GT	GT0	Strep. salivarius
contig_2_58	QGU78188.1|GT2	ODP-AF04-99	GT	GT2	Strep. salivarius
contig_2_61	AMB83189.1|GT2	ODP-AF04-99	GT	GT2	Strep. salivarius
contig_2_62	AMB83190.1|GT4	ODP-AF04-99	GT	GT4	Strep. salivarius
contig_2_64	QGU78182.1|GT2	ODP-AF04-99	GT	GT2	Strep. salivarius
contig_2_97	CAG7911095.1|GH5_11	ODP-AF04-99	GH	GH5_11	Strep. salivarius
contig_3_10	QEM32684.1|GH77	ODP-AF04-99	GH	GH77	Strep. salivarius
contig_3_11	QKH69755.1|GT35	ODP-AF04-99	GT	GT35	Strep. salivarius
contig_3_57	AGL64020.2|AA10	ODP-AF04-99	AA	AA10	Strep. salivarius
contig_3_96	CAE6204650.1|GH28	ODP-AF04-99	GH	GH28	Strep. salivarius
contig_4_12	QEM32801.1|GH73	ODP-AF04-99	GH	GH73	Strep. salivarius
contig_4_52	BEI59196.1|GH130_1	ODP-AF04-99	GH	GH130_1	Strep. salivarius
contig_4_64	QKH69912.1|GH23	ODP-AF04-99	GH	GH23	Strep. salivarius
contig_4_66	AMJ20543.1|GH13_11	ODP-AF04-99	GH	GH13_11	Strep. salivarius
contig_4_69	AGL64700.2|GH23	ODP-AF04-99	GH	GH23	Strep. salivarius
contig_5_6	AGL63717.2|GT4	ODP-AF04-99	GT	GT4	Strep. salivarius
contig_5_17	WAO96723.1|GH0	ODP-AF04-99	GH	GH0	Strep. salivarius
contig_5_56	AGL63702.2|GT4	ODP-AF04-99	GT	GT4	Strep. salivarius
contig_5_65	AIY21653.1|CE4	ODP-AF04-99	CE	CE4	Strep. salivarius
contig_5_96	UOT91118.1|GH13_5	ODP-AF04-99	GH	GH13_5	Strep. salivarius
contig_6_4	QEM33029.1|GH70	ODP-AF04-99	GH	GH70	Strep. salivarius
contig_6_23	AEJ53086.1|GH70	ODP-AF04-99	GH	GH70	Strep. salivarius
contig_6_24	AAE35922.1|GH70|2.4.1.5	ODP-AF04-99	GH	GH70	Strep. salivarius
contig_6_35	ARI59786.1|GH70	ODP-AF04-99	GH	GH70	Strep. salivarius
contig_7_7	QUI22575.1|CBM50	ODP-AF04-99	CBM	CBM50	Strep. salivarius
contig_7_16	CCO12633.2|GH84	ODP-AF04-99	GH	GH84	Strep. salivarius
contig_7_22	QGU82116.1|CBM50	ODP-AF04-99	CBM	CBM50	Strep. salivarius
contig_7_36	BBF72686.1|GT2	ODP-AF04-99	GT	GT2	Strep. salivarius
contig_7_49	QEM33224.1|GT8	ODP-AF04-99	GT	GT8	Strep. salivarius
contig_7_50	QEM33225.1|GT4	ODP-AF04-99	GT	GT4	Strep. salivarius
contig_7_81	CCO11054.2|CBM50	ODP-AF04-99	CBM	CBM50	Strep. salivarius
contig_8_41	CCO11632.2|GH3	ODP-AF04-99	GH	GH3	Strep. salivarius
contig_8_55	QEM32530.1|GH70	ODP-AF04-99	GH	GH70	Strep. salivarius
contig_8_56	CCB93509.1|GH70	ODP-AF04-99	GH	GH70	Strep. salivarius
contig_8_57	QEM32528.1|GH70	ODP-AF04-99	GH	GH70	Strep. salivarius
contig_8_58	QEM32527.1|GT2	ODP-AF04-99	GT	GT2	Strep. salivarius
contig_8_74	BBD21966.1|GT2	ODP-AF04-99	GT	GT2	Strep. salivarius
contig_9_67	AOG60880.1|GH32	ODP-AF04-99	GH	GH32	Strep. salivarius
contig_9_68	CCB96107.1|GH32	ODP-AF04-99	GH	GH32	Strep. salivarius
contig_10_45	SQF76383.1|GT4	ODP-AF04-99	GT	GT4	Strep. salivarius
contig_10_46	SQF76382.1|GT4	ODP-AF04-99	GT	GT4	Strep. salivarius
contig_10_47	CAN65674.1|GH28	ODP-AF04-99	GH	GH28	Strep. salivarius
contig_11_2	CCB93675.1|GT2|GT8	ODP-AF04-99	GT	GT2	Strep. salivarius
contig_11_2	CCB93675.1|GT2|GT8	ODP-AF04-99	GT	GT8	Strep. salivarius
contig_11_32	CCO09729.2|GH1	ODP-AF04-99	GH	GH1	Strep. salivarius
contig_11_43	CCO12112.2|GH13_31	ODP-AF04-99	GH	GH13_31	Strep. salivarius
contig_12_12	QBQ55251.1|CBM50	ODP-AF04-99	CBM	CBM50	Strep. salivarius
contig_12_23	QEM32624.1|GH73	ODP-AF04-99	GH	GH73	Strep. salivarius
contig_12_41	QGU82661.1|GT26	ODP-AF04-99	GT	GT26	Strep. salivarius
contig_12_43	QEM32644.1|GT2	ODP-AF04-99	GT	GT2	Strep. salivarius
contig_12_44	QEM32645.1|GT4	ODP-AF04-99	GT	GT4	Strep. salivarius
contig_12_46	QEM32646.1|GT2	ODP-AF04-99	GT	GT2	Strep. salivarius
contig_12_47	QTF54836.1|GT0	ODP-AF04-99	GT	GT0	Strep. salivarius
contig_12_55	QEM32654.1|GH1	ODP-AF04-99	GH	GH1	Strep. salivarius
contig_14_35	AIY21730.1|GH1	ODP-AF04-99	GH	GH1	Strep. salivarius
contig_14_41	CCB94001.1|GH1	ODP-AF04-99	GH	GH1	Strep. salivarius
contig_15_2	CCB94255.1|GT51	ODP-AF04-99	GT	GT51	Strep. salivarius
contig_15_4	CCO12868.2|GH1	ODP-AF04-99	GH	GH1	Strep. salivarius
contig_15_38	CAI32748.2|GT4	ODP-AF04-99	GT	GT4	Strep. salivarius
contig_16_2	QGU78819.1|GT28	ODP-AF04-99	GT	GT28	Strep. salivarius
contig_16_24	QEM32444.1|GH87	ODP-AF04-99	GH	GH87	Strep. salivarius
contig_16_38	QEM32429.1|GH25	ODP-AF04-99	GH	GH25	Strep. salivarius
contig_16_43	QEM32424.1|CBM50	ODP-AF04-99	CBM	CBM50	Strep. salivarius
contig_17_38	QAY63367.1|GT2	ODP-AF04-99	GT	GT2	Strep. salivarius
contig_18_16	QMI51832.1|GH73	ODP-AF04-99	GH	GH73	Strep. salivarius
contig_18_45	ALR08738.2|GT83	ODP-AF04-99	GT	GT83	Strep. salivarius
contig_19_8	ARI59740.1|GT2|GT8	ODP-AF04-99	GT	GT2	Strep. salivarius
contig_19_8	ARI59740.1|GT2|GT8	ODP-AF04-99	GT	GT8	Strep. salivarius
contig_19_9	QEM33046.1|GT8	ODP-AF04-99	GT	GT8	Strep. salivarius
contig_19_10	AEJ53042.1|GT8	ODP-AF04-99	GT	GT8	Strep. salivarius
contig_19_11	AEJ53043.1|GT4	ODP-AF04-99	GT	GT4	Strep. salivarius
contig_19_12	SQF75540.1|GT8	ODP-AF04-99	GT	GT8	Strep. salivarius
contig_19_13	QGU82275.1|GT113	ODP-AF04-99	GT	GT113	Strep. salivarius
contig_19_14	SQF75542.1|GT8	ODP-AF04-99	GT	GT8	Strep. salivarius
contig_19_15	QEM33040.1|GT2	ODP-AF04-99	GT	GT2	Strep. salivarius
contig_19_16	QEM33039.1|GT101|GT8	ODP-AF04-99	GT	GT101	Strep. salivarius
contig_19_16	QEM33039.1|GT101|GT8	ODP-AF04-99	GT	GT8	Strep. salivarius
contig_19_17	AEJ53050.1|GT8	ODP-AF04-99	GT	GT8	Strep. salivarius
contig_20_7	CUS05224.2|CE14	ODP-AF04-99	CE	CE14	Strep. salivarius
contig_20_26	QYU66396.1|GH13_23	ODP-AF04-99	GH	GH13_23	Strep. salivarius
contig_20_28	CCO12102.2|GH13_31	ODP-AF04-99	GH	GH13_31	Strep. salivarius
contig_21_23	CAE6076421.1|GH27	ODP-AF04-99	GH	GH27	Strep. salivarius
contig_21_27	CAD7252417.1|GH13	ODP-AF04-99	GH	GH13	Strep. salivarius
contig_21_30	AGL63717.2|GT4	ODP-AF04-99	GT	GT4	Strep. salivarius
contig_22_21	ARC23391.1|GH23	ODP-AF04-99	GH	GH23	Strep. salivarius
contig_22_22	AMB83600.1|CBM50	ODP-AF04-99	CBM	CBM50	Strep. salivarius
contig_23_14	QEM31908.1|CBM50	ODP-AF04-99	CBM	CBM50	Strep. salivarius
contig_23_21	CAD7226128.1|GH38	ODP-AF04-99	GH	GH38	Strep. salivarius
contig_25_18	AEJ53119.1|GH2	ODP-AF04-99	GH	GH2	Strep. salivarius
contig_25_19	AUH38424.1|GH42	ODP-AF04-99	GH	GH42	Strep. salivarius
contig_25_21	ADN17640.1|GT2	ODP-AF04-99	GT	GT2	Strep. salivarius
contig_25_25	CCB93012.1|GH13_31	ODP-AF04-99	GH	GH13_31	Strep. salivarius
contig_26_9	WJM08831.1|CBM50	ODP-AF04-99	CBM	CBM50	Strep. salivarius
contig_26_14	QGU81881.1|GH66	ODP-AF04-99	GH	GH66	Strep. salivarius
contig_27_6	ALR80175.1|CBM66|GH32	ODP-AF04-99	CBM	CBM66	Strep. salivarius
contig_27_6	ALR80175.1|CBM66|GH32	ODP-AF04-99	GH	GH32	Strep. salivarius
contig_28_35	CAN80640.1|GT47	ODP-AF04-99	GT	GT47	Strep. salivarius
contig_29_8	CCB94270.1|GH13_29	ODP-AF04-99	GH	GH13_29	Strep. salivarius
contig_29_9	QMI51793.1|GH13_29	ODP-AF04-99	GH	GH13_29	Strep. salivarius
contig_29_18	WAO96723.1|GH0	ODP-AF04-99	GH	GH0	Strep. salivarius
contig_30_16	CAD7245033.1|GT58	ODP-AF04-99	GT	GT58	Strep. salivarius
contig_31_3	QXF33454.1|GH13_3	ODP-AF04-99	GH	GH13_3	Strep. salivarius
contig_31_8	QEM32220.1|CE9	ODP-AF04-99	CE	CE9	Strep. salivarius
contig_31_13	ARI58749.1|GH73	ODP-AF04-99	GH	GH73	Strep. salivarius
contig_32_13	CCO11994.2|GT4	ODP-AF04-99	GT	GT4	Strep. salivarius
contig_33_9	AIY20374.1|GH73	ODP-AF04-99	GH	GH73	Strep. salivarius
contig_36_3	AGL63717.2|GT4	ODP-AF04-99	GT	GT4	Strep. salivarius
contig_37_1	QGU78609.1|GH25	ODP-AF04-99	GH	GH25	Strep. salivarius
contig_39_6	CCB93441.1|GH8	ODP-AF04-99	GH	GH8	Strep. salivarius
contig_39_7	QEM32588.1|GT2	ODP-AF04-99	GT	GT2	Strep. salivarius
contig_39_10	WEA13229.1|GT0	ODP-AF04-99	GT	GT0	Strep. salivarius
contig_42_1	QEM32670.1|GH25	ODP-AF04-99	GH	GH25	Strep. salivarius
contig_42_2	QGU78608.1|CBM41|CBM48|GH13_12	ODP-AF04-99	CBM	CBM41	Strep. salivarius
contig_42_2	QGU78608.1|CBM41|CBM48|GH13_12	ODP-AF04-99	CBM	CBM48	Strep. salivarius
contig_42_2	QGU78608.1|CBM41|CBM48|GH13_12	ODP-AF04-99	GH	GH13_12	Strep. salivarius
contig_1_7	AGL63871.2|GT2	ODP-AF05-203	GT	GT2	Strep. anginosus
contig_1_35	VTS26160.1|GH1	ODP-AF05-203	GH	GH1	Strep. anginosus
contig_1_44	QUI22575.1|CBM50	ODP-AF05-203	CBM	CBM50	Strep. anginosus
contig_1_58	QBQ55251.1|CBM50	ODP-AF05-203	CBM	CBM50	Strep. anginosus
contig_1_87	CCO11681.2|GH25	ODP-AF05-203	GH	GH25	Strep. anginosus
contig_1_91	UGQ07647.1|CBM48|GH13_9	ODP-AF05-203	CBM	CBM48	Strep. anginosus
contig_1_91	UGQ07647.1|CBM48|GH13_9	ODP-AF05-203	GH	GH13_9	Strep. anginosus
contig_1_92	BBM21727.1|GH13_9	ODP-AF05-203	GH	GH13_9	Strep. anginosus
contig_1_94	VED97978.1|GT5	ODP-AF05-203	GT	GT5	Strep. anginosus
contig_1_95	AZQ41478.1|GT35	ODP-AF05-203	GT	GT35	Strep. anginosus
contig_1_102	CAD7245033.1|GT58	ODP-AF05-203	GT	GT58	Strep. anginosus
contig_1_121	QAY63367.1|GT2	ODP-AF05-203	GT	GT2	Strep. anginosus
contig_1_126	VED97947.1|GT2	ODP-AF05-203	GT	GT2	Strep. anginosus
contig_1_129	VED97944.1|GT2	ODP-AF05-203	GT	GT2	Strep. anginosus
contig_1_131	AGU83145.1|GT2	ODP-AF05-203	GT	GT2	Strep. anginosus
contig_1_133	AGU81417.1|GT4	ODP-AF05-203	GT	GT4	Strep. anginosus
contig_1_134	AGU81418.1|GT2	ODP-AF05-203	GT	GT2	Strep. anginosus
contig_1_137	ALL02772.1|GT2	ODP-AF05-203	GT	GT2	Strep. anginosus
contig_1_138	SQF75473.1|GT0	ODP-AF05-203	GT	GT0	Strep. anginosus
contig_1_142	VED97931.1|GT4	ODP-AF05-203	GT	GT4	Strep. anginosus
contig_1_143	WEB35420.1|GT4	ODP-AF05-203	GT	GT4	Strep. anginosus
contig_1_194	AZQ41573.1|CE4	ODP-AF05-203	CE	CE4	Strep. anginosus
contig_2_11	AZQ42208.1|GT8	ODP-AF05-203	GT	GT8	Strep. anginosus
contig_2_20	CBA03971.1|GT30	ODP-AF05-203	GT	GT30	Strep. anginosus
contig_2_73	AGL63717.2|GT4	ODP-AF05-203	GT	GT4	Strep. anginosus
contig_2_85	CCO11632.2|GH3	ODP-AF05-203	GH	GH3	Strep. anginosus
contig_2_168	AGL63702.2|GT4	ODP-AF05-203	GT	GT4	Strep. anginosus
contig_2_181	AZQ42108.1|GH1	ODP-AF05-203	GH	GH1	Strep. anginosus
contig_2_184	AZQ42105.1|CBM61|GH53	ODP-AF05-203	CBM	CBM61	Strep. anginosus
contig_2_184	AZQ42105.1|CBM61|GH53	ODP-AF05-203	GH	GH53	Strep. anginosus
contig_3_32	BEI59196.1|GH130_1	ODP-AF05-203	GH	GH130_1	Strep. anginosus
contig_3_35	CCO11994.2|GT4	ODP-AF05-203	GT	GT4	Strep. anginosus
contig_3_110	BEI59196.1|GH130_1	ODP-AF05-203	GH	GH130_1	Strep. anginosus
contig_3_115	CCO09729.2|GH1	ODP-AF05-203	GH	GH1	Strep. anginosus
contig_3_132	VEE12775.1|GH25	ODP-AF05-203	GH	GH25	Strep. anginosus
contig_3_139	BAN61325.1|GH25	ODP-AF05-203	GH	GH25	Strep. anginosus
contig_3_161	CAN65674.1|GH28	ODP-AF05-203	GH	GH28	Strep. anginosus
contig_4_36	VED98540.1|CBM50|GH23	ODP-AF05-203	CBM	CBM50	Strep. anginosus
contig_4_36	VED98540.1|CBM50|GH23	ODP-AF05-203	GH	GH23	Strep. anginosus
contig_4_42	AGU82512.1|CBM50	ODP-AF05-203	CBM	CBM50	Strep. anginosus
contig_4_77	ALR08738.2|GT83	ODP-AF05-203	GT	GT83	Strep. anginosus
contig_4_79	AZQ42556.1|CBM48|CBM68|GH13_14	ODP-AF05-203	CBM	CBM48	Strep. anginosus
contig_4_79	AZQ42556.1|CBM48|CBM68|GH13_14	ODP-AF05-203	CBM	CBM68	Strep. anginosus
contig_4_79	AZQ42556.1|CBM48|CBM68|GH13_14	ODP-AF05-203	GH	GH13_14	Strep. anginosus
contig_4_83	AGL62895.2|GH13	ODP-AF05-203	GH	GH13	Strep. anginosus
contig_4_84	CCO11983.2|CBM50|CE4	ODP-AF05-203	CBM	CBM50	Strep. anginosus
contig_4_84	CCO11983.2|CBM50|CE4	ODP-AF05-203	CE	CE4	Strep. anginosus
contig_4_85	VED98613.1|GH77	ODP-AF05-203	GH	GH77	Strep. anginosus
contig_4_86	VTS48643.1|GT35	ODP-AF05-203	GT	GT35	Strep. anginosus
contig_4_121	BAK52166.1|GT4	ODP-AF05-203	GT	GT4	Strep. anginosus
contig_4_122	VED98651.1|GT4	ODP-AF05-203	GT	GT4	Strep. anginosus
contig_4_125	WGE57044.1|GT4	ODP-AF05-203	GT	GT4	Strep. anginosus
contig_4_126	QTF54836.1|GT0	ODP-AF05-203	GT	GT0	Strep. anginosus
contig_4_127	AZQ42493.1|GT0	ODP-AF05-203	GT	GT0	Strep. anginosus
contig_4_130	AZQ42490.1|GT2	ODP-AF05-203	GT	GT2	Strep. anginosus
contig_5_9	CAD7252417.1|GH13	ODP-AF05-203	GH	GH13	Strep. anginosus
contig_5_25	QLL96560.1|GH73	ODP-AF05-203	GH	GH73	Strep. anginosus
contig_5_74	WEA13229.1|GT0	ODP-AF05-203	GT	GT0	Strep. anginosus
contig_5_76	VED98895.1|GT2	ODP-AF05-203	GT	GT2	Strep. anginosus
contig_5_77	VED98896.1|GH8	ODP-AF05-203	GH	GH8	Strep. anginosus
contig_5_105	VED98926.1|GH32	ODP-AF05-203	GH	GH32	Strep. anginosus
contig_5_106	AOG60880.1|GH32	ODP-AF05-203	GH	GH32	Strep. anginosus
contig_5_114	ALL03624.1|GH1	ODP-AF05-203	GH	GH1	Strep. anginosus
contig_5_131	ALR08738.2|GT83	ODP-AF05-203	GT	GT83	Strep. anginosus
contig_6_46	AGL64700.2|GH23	ODP-AF05-203	GH	GH23	Strep. anginosus
contig_6_49	AMJ20543.1|GH13_11	ODP-AF05-203	GH	GH13_11	Strep. anginosus
contig_6_51	AGU83464.1|GH23	ODP-AF05-203	GH	GH23	Strep. anginosus
contig_6_108	CCO12112.2|GH13_31	ODP-AF05-203	GH	GH13_31	Strep. anginosus
contig_6_134	UGQ07953.1|GH13_5	ODP-AF05-203	GH	GH13_5	Strep. anginosus
contig_7_15	CCO10293.2|CBM50	ODP-AF05-203	CBM	CBM50	Strep. anginosus
contig_7_28	CCO11054.2|CBM50	ODP-AF05-203	CBM	CBM50	Strep. anginosus
contig_7_31	WIK86653.1|GH13_29	ODP-AF05-203	GH	GH13_29	Strep. anginosus
contig_7_32	QCH95999.1|GH13_29	ODP-AF05-203	GH	GH13_29	Strep. anginosus
contig_7_35	AGL65524.2|GH36	ODP-AF05-203	GH	GH36	Strep. anginosus
contig_7_47	AGU82936.1|GT28	ODP-AF05-203	GT	GT28	Strep. anginosus
contig_7_87	QYO62262.1|GH13	ODP-AF05-203	GH	GH13	Strep. anginosus
contig_7_106	AGL64353.2|CBM50|GH25	ODP-AF05-203	CBM	CBM50	Strep. anginosus
contig_7_106	AGL64353.2|CBM50|GH25	ODP-AF05-203	GH	GH25	Strep. anginosus
contig_7_114	AGL63717.2|GT4	ODP-AF05-203	GT	GT4	Strep. anginosus
contig_7_133	CCO12868.2|GH1	ODP-AF05-203	GH	GH1	Strep. anginosus
contig_7_135	AZQ41124.1|GT51	ODP-AF05-203	GT	GT51	Strep. anginosus
contig_8_28	AGU81518.1|GH73	ODP-AF05-203	GH	GH73	Strep. anginosus
contig_8_102	VED97635.1|GH94	ODP-AF05-203	GH	GH94	Strep. anginosus
contig_8_103	VED97636.1|GH94	ODP-AF05-203	GH	GH94	Strep. anginosus
contig_8_107	VED97640.1|GH16_21	ODP-AF05-203	GH	GH16_21	Strep. anginosus
contig_8_108	VED97641.1|GH16_21	ODP-AF05-203	GH	GH16_21	Strep. anginosus
contig_8_117	WEB12428.1|CBM41|CBM48|GH13_14	ODP-AF05-203	CBM	CBM41	Strep. anginosus
contig_8_117	WEB12428.1|CBM41|CBM48|GH13_14	ODP-AF05-203	CBM	CBM48	Strep. anginosus
contig_8_117	WEB12428.1|CBM41|CBM48|GH13_14	ODP-AF05-203	GH	GH13_14	Strep. anginosus
contig_9_12	CCO12102.2|GH13_31	ODP-AF05-203	GH	GH13_31	Strep. anginosus
contig_9_15	QYU66396.1|GH13_23	ODP-AF05-203	GH	GH13_23	Strep. anginosus
contig_9_33	AGU80855.1|GH35	ODP-AF05-203	GH	GH35	Strep. anginosus
contig_9_66	QWU85921.1|GH130	ODP-AF05-203	GH	GH130	Strep. anginosus
contig_9_83	QBQ55156.1|CBM50	ODP-AF05-203	CBM	CBM50	Strep. anginosus
contig_9_86	VED98417.1|GT51	ODP-AF05-203	GT	GT51	Strep. anginosus
contig_10_30	VED98255.1|CE9	ODP-AF05-203	CE	CE9	Strep. anginosus
contig_10_33	AGL64345.2|GT2	ODP-AF05-203	GT	GT2	Strep. anginosus
contig_11_26	AGL63717.2|GT4	ODP-AF05-203	GT	GT4	Strep. anginosus
contig_11_35	CAN80640.1|GT47	ODP-AF05-203	GT	GT47	Strep. anginosus
contig_11_59	CAD7226128.1|GH38	ODP-AF05-203	GH	GH38	Strep. anginosus
contig_11_68	CAI32748.2|GT4	ODP-AF05-203	GT	GT4	Strep. anginosus
contig_12_17	AZQ41269.1|GT51	ODP-AF05-203	GT	GT51	Strep. anginosus
contig_12_29	ALR09732.2|GH92	ODP-AF05-203	GH	GH92	Strep. anginosus
contig_12_51	CAG7911095.1|GH5_11	ODP-AF05-203	GH	GH5_11	Strep. anginosus
contig_13_12	BBF72686.1|GT2	ODP-AF05-203	GT	GT2	Strep. anginosus
contig_13_26	ALL03755.1|GH1	ODP-AF05-203	GH	GH1	Strep. anginosus
contig_13_35	ALF27832.1|GH25	ODP-AF05-203	GH	GH25	Strep. anginosus
contig_13_38	WEB74396.1|GH1	ODP-AF05-203	GH	GH1	Strep. anginosus
contig_14_9	WEB74362.1|CBM41|CBM48|GH13_12	ODP-AF05-203	CBM	CBM41	Strep. anginosus
contig_14_9	WEB74362.1|CBM41|CBM48|GH13_12	ODP-AF05-203	CBM	CBM48	Strep. anginosus
contig_14_9	WEB74362.1|CBM41|CBM48|GH13_12	ODP-AF05-203	GH	GH13_12	Strep. anginosus
contig_14_27	ALL03727.1|GT2	ODP-AF05-203	GT	GT2	Strep. anginosus
contig_14_28	BBD21966.1|GT2	ODP-AF05-203	GT	GT2	Strep. anginosus
contig_14_34	ALL03733.1|GH1	ODP-AF05-203	GH	GH1	Strep. anginosus
contig_15_7	CCO12633.2|GH84	ODP-AF05-203	GH	GH84	Strep. anginosus
contig_16_4	CAE6204650.1|GH28	ODP-AF05-203	GH	GH28	Strep. anginosus
contig_16_12	CAG7883609.1|GT1	ODP-AF05-203	GT	GT1	Strep. anginosus
contig_20_2	CUS04921.2|GT4	ODP-AF05-203	GT	GT4	Strep. anginosus
contig_1_11	CAG7911095.1|GH5_11	ODP-AF05-68	GH	GH5_11	Strep. parasanguinis
contig_1_54	QEW09291.1|GT28	ODP-AF05-68	GT	GT28	Strep. parasanguinis
contig_1_66	AGL63717.2|GT4	ODP-AF05-68	GT	GT4	Strep. parasanguinis
contig_1_71	AEH55108.1|GH32	ODP-AF05-68	GH	GH32	Strep. parasanguinis
contig_1_72	CCO11632.2|GH3	ODP-AF05-68	GH	GH3	Strep. parasanguinis
contig_1_90	CCO12633.2|GH84	ODP-AF05-68	GH	GH84	Strep. parasanguinis
contig_1_161	AGL63702.2|GT4	ODP-AF05-68	GT	GT4	Strep. parasanguinis
contig_1_191	QUI22575.1|CBM50	ODP-AF05-68	CBM	CBM50	Strep. parasanguinis
contig_1_201	QEW09479.1|CBM48|GH13_9	ODP-AF05-68	CBM	CBM48	Strep. parasanguinis
contig_1_201	QEW09479.1|CBM48|GH13_9	ODP-AF05-68	GH	GH13_9	Strep. parasanguinis
contig_1_202	BBM21727.1|GH13_9	ODP-AF05-68	GH	GH13_9	Strep. parasanguinis
contig_1_204	QEW09482.1|GT5	ODP-AF05-68	GT	GT5	Strep. parasanguinis
contig_1_212	CAD7245033.1|GT58	ODP-AF05-68	GT	GT58	Strep. parasanguinis
contig_1_244	AWZ17133.1|GH13_30	ODP-AF05-68	GH	GH13_30	Strep. parasanguinis
contig_1_273	QEW09554.1|CE4	ODP-AF05-68	CE	CE4	Strep. parasanguinis
contig_1_276	QWL82724.1|GT2	ODP-AF05-68	GT	GT2	Strep. parasanguinis
contig_1_279	SQH66679.1|GT2	ODP-AF05-68	GT	GT2	Strep. parasanguinis
contig_1_280	VEE19585.1|GT2	ODP-AF05-68	GT	GT2	Strep. parasanguinis
contig_1_281	AFJ25822.1|GT2	ODP-AF05-68	GT	GT2	Strep. parasanguinis
contig_1_283	QEW09562.1|GT4	ODP-AF05-68	GT	GT4	Strep. parasanguinis
contig_1_284	QEW09563.1|GT2	ODP-AF05-68	GT	GT2	Strep. parasanguinis
contig_1_287	AGY39911.1|GT2	ODP-AF05-68	GT	GT2	Strep. parasanguinis
contig_1_288	QEW09567.1|GT0	ODP-AF05-68	GT	GT0	Strep. parasanguinis
contig_1_313	QEW09593.1|CBM41|CBM48|GH13_14	ODP-AF05-68	CBM	CBM41	Strep. parasanguinis
contig_1_313	QEW09593.1|CBM41|CBM48|GH13_14	ODP-AF05-68	CBM	CBM48	Strep. parasanguinis
contig_1_313	QEW09593.1|CBM41|CBM48|GH13_14	ODP-AF05-68	GH	GH13_14	Strep. parasanguinis
contig_1_322	CCO09729.2|GH1	ODP-AF05-68	GH	GH1	Strep. parasanguinis
contig_1_348	AEH55398.1|CBM34|GH13_20	ODP-AF05-68	CBM	CBM34	Strep. parasanguinis
contig_1_348	AEH55398.1|CBM34|GH13_20	ODP-AF05-68	GH	GH13_20	Strep. parasanguinis
contig_1_421	CCO11994.2|GT4	ODP-AF05-68	GT	GT4	Strep. parasanguinis
contig_1_423	BEI59196.1|GH130_1	ODP-AF05-68	GH	GH130_1	Strep. parasanguinis
contig_1_450	WAO96723.1|GH0	ODP-AF05-68	GH	GH0	Strep. parasanguinis
contig_1_454	AGL64700.2|GH23	ODP-AF05-68	GH	GH23	Strep. parasanguinis
contig_1_457	AMJ20543.1|GH13_11	ODP-AF05-68	GH	GH13_11	Strep. parasanguinis
contig_1_459	QWL82947.1|GH23	ODP-AF05-68	GH	GH23	Strep. parasanguinis
contig_1_464	AFJ26032.1|GT1	ODP-AF05-68	GT	GT1	Strep. parasanguinis
contig_1_473	AFJ26040.1|CE7	ODP-AF05-68	CE	CE7	Strep. parasanguinis
contig_2_25	QEW09809.1|GH73	ODP-AF05-68	GH	GH73	Strep. parasanguinis
contig_2_53	CAE6204650.1|GH28	ODP-AF05-68	GH	GH28	Strep. parasanguinis
contig_2_134	QEW09913.1|GH1	ODP-AF05-68	GH	GH1	Strep. parasanguinis
contig_2_177	AEH55758.1|GH13_5	ODP-AF05-68	GH	GH13_5	Strep. parasanguinis
contig_2_187	ADN17640.1|GT2	ODP-AF05-68	GT	GT2	Strep. parasanguinis
contig_2_191	AEH55775.1|GH36	ODP-AF05-68	GH	GH36	Strep. parasanguinis
contig_2_192	QEW09974.1|GH13_18	ODP-AF05-68	GH	GH13_18	Strep. parasanguinis
contig_2_196	AEH55780.1|GH36	ODP-AF05-68	GH	GH36	Strep. parasanguinis
contig_2_233	QAY63367.1|GT2	ODP-AF05-68	GT	GT2	Strep. parasanguinis
contig_2_295	CCO11681.2|GH25	ODP-AF05-68	GH	GH25	Strep. parasanguinis
contig_3_4	QEW10473.1|GT113	ODP-AF05-68	GT	GT113	Strep. parasanguinis
contig_3_10	QEW10467.1|GT4	ODP-AF05-68	GT	GT4	Strep. parasanguinis
contig_3_11	QEW10466.1|GT8	ODP-AF05-68	GT	GT8	Strep. parasanguinis
contig_3_35	CAD7226128.1|GH38	ODP-AF05-68	GH	GH38	Strep. parasanguinis
contig_3_37	QEW10443.1|CBM32|GH85	ODP-AF05-68	CBM	CBM32	Strep. parasanguinis
contig_3_37	QEW10443.1|CBM32|GH85	ODP-AF05-68	GH	GH85	Strep. parasanguinis
contig_3_86	BBF72686.1|GT2	ODP-AF05-68	GT	GT2	Strep. parasanguinis
contig_3_98	QBQ55156.1|CBM50	ODP-AF05-68	CBM	CBM50	Strep. parasanguinis
contig_3_107	AFJ26729.1|GH43_12	ODP-AF05-68	GH	GH43_12	Strep. parasanguinis
contig_3_109	QUE54032.1|GH3	ODP-AF05-68	GH	GH3	Strep. parasanguinis
contig_3_112	AFJ26727.1|GH78	ODP-AF05-68	GH	GH78	Strep. parasanguinis
contig_3_113	AFJ26726.1|GH3	ODP-AF05-68	GH	GH3	Strep. parasanguinis
contig_3_116	AFJ26723.1|GH2	ODP-AF05-68	GH	GH2	Strep. parasanguinis
contig_3_119	AGY40279.1|GH1	ODP-AF05-68	GH	GH1	Strep. parasanguinis
contig_3_137	AGL64020.2|AA10	ODP-AF05-68	AA	AA10	Strep. parasanguinis
contig_3_146	AEH56192.1|GH31	ODP-AF05-68	GH	GH31	Strep. parasanguinis
contig_3_147	QEW10342.1|GH13_31	ODP-AF05-68	GH	GH13_31	Strep. parasanguinis
contig_3_162	BBD21966.1|GT2	ODP-AF05-68	GT	GT2	Strep. parasanguinis
contig_3_163	QEW10325.1|GT2	ODP-AF05-68	GT	GT2	Strep. parasanguinis
contig_3_176	AFJ26641.1|GH32	ODP-AF05-68	GH	GH32	Strep. parasanguinis
contig_3_177	AGL62906.2|GH13_31	ODP-AF05-68	GH	GH13_31	Strep. parasanguinis
contig_3_200	QEW10286.1|GT8	ODP-AF05-68	GT	GT8	Strep. parasanguinis
contig_3_201	QEW10285.1|GT2	ODP-AF05-68	GT	GT2	Strep. parasanguinis
contig_3_202	QEW10284.1|GT8	ODP-AF05-68	GT	GT8	Strep. parasanguinis
contig_3_203	QEW10283.1|GT4	ODP-AF05-68	GT	GT4	Strep. parasanguinis
contig_4_6	CCO12112.2|GH13_31	ODP-AF05-68	GH	GH13_31	Strep. parasanguinis
contig_4_23	QBQ55251.1|CBM50	ODP-AF05-68	CBM	CBM50	Strep. parasanguinis
contig_4_33	QEW10094.1|GH25	ODP-AF05-68	GH	GH25	Strep. parasanguinis
contig_4_70	CAN65674.1|GH28	ODP-AF05-68	GH	GH28	Strep. parasanguinis
contig_4_71	QWL83445.1|GT4	ODP-AF05-68	GT	GT4	Strep. parasanguinis
contig_4_72	AFJ26454.1|GT4	ODP-AF05-68	GT	GT4	Strep. parasanguinis
contig_4_106	AGL63871.2|GT2	ODP-AF05-68	GT	GT2	Strep. parasanguinis
contig_4_124	CCO10293.2|CBM50	ODP-AF05-68	CBM	CBM50	Strep. parasanguinis
contig_4_136	CCO11054.2|CBM50	ODP-AF05-68	CBM	CBM50	Strep. parasanguinis
contig_4_185	CBA03971.1|GT30	ODP-AF05-68	GT	GT30	Strep. parasanguinis
contig_5_52	QEW09103.1|GH20	ODP-AF05-68	GH	GH20	Strep. parasanguinis
contig_5_87	AEH56829.1|GH13_31	ODP-AF05-68	GH	GH13_31	Strep. parasanguinis
contig_5_93	CAD7252417.1|GH13	ODP-AF05-68	GH	GH13	Strep. parasanguinis
contig_5_125	AGL64353.2|CBM50|GH25	ODP-AF05-68	CBM	CBM50	Strep. parasanguinis
contig_5_125	AGL64353.2|CBM50|GH25	ODP-AF05-68	GH	GH25	Strep. parasanguinis
contig_5_131	AGL63717.2|GT4	ODP-AF05-68	GT	GT4	Strep. parasanguinis
contig_5_147	AEH56762.1|GH1	ODP-AF05-68	GH	GH1	Strep. parasanguinis
contig_5_153	CUS04921.2|GT4	ODP-AF05-68	GT	GT4	Strep. parasanguinis
contig_6_35	AFJ25141.1|GH29	ODP-AF05-68	GH	GH29	Strep. parasanguinis
contig_6_50	WAO96723.1|GH0	ODP-AF05-68	GH	GH0	Strep. parasanguinis
contig_6_68	URK68076.1|GH0	ODP-AF05-68	GH	GH0	Strep. parasanguinis
contig_6_86	QEW08839.1|GH73	ODP-AF05-68	GH	GH73	Strep. parasanguinis
contig_6_93	QWL81888.1|CBM50	ODP-AF05-68	CBM	CBM50	Strep. parasanguinis
contig_6_95	QWU85921.1|GH130	ODP-AF05-68	GH	GH130	Strep. parasanguinis
contig_6_131	AEH56548.1|GH35	ODP-AF05-68	GH	GH35	Strep. parasanguinis
contig_6_140	QYU66396.1|GH13_23	ODP-AF05-68	GH	GH13_23	Strep. parasanguinis
contig_6_143	CCO12102.2|GH13_31	ODP-AF05-68	GH	GH13_31	Strep. parasanguinis
contig_7_2	AGY39024.1|GH25	ODP-AF05-68	GH	GH25	Strep. parasanguinis
contig_7_3	ARC49781.1|GT113	ODP-AF05-68	GT	GT113	Strep. parasanguinis
contig_7_9	VEE18976.1|GT2	ODP-AF05-68	GT	GT2	Strep. parasanguinis
contig_7_10	QTF54836.1|GT0	ODP-AF05-68	GT	GT0	Strep. parasanguinis
contig_7_11	VEE18974.1|GT4	ODP-AF05-68	GT	GT4	Strep. parasanguinis
contig_7_12	VED68047.1|GT26	ODP-AF05-68	GT	GT26	Strep. parasanguinis
contig_7_47	AEH56448.1|GT35	ODP-AF05-68	GT	GT35	Strep. parasanguinis
contig_7_48	AEH56449.1|GH77	ODP-AF05-68	GH	GH77	Strep. parasanguinis
contig_7_49	CCO11983.2|CBM50|CE4	ODP-AF05-68	CBM	CBM50	Strep. parasanguinis
contig_7_49	CCO11983.2|CBM50|CE4	ODP-AF05-68	CE	CE4	Strep. parasanguinis
contig_7_50	AGL62895.2|GH13	ODP-AF05-68	GH	GH13	Strep. parasanguinis
contig_7_54	AFJ26990.1|CBM48|CBM68|GH13_14	ODP-AF05-68	CBM	CBM48	Strep. parasanguinis
contig_7_54	AFJ26990.1|CBM48|CBM68|GH13_14	ODP-AF05-68	CBM	CBM68	Strep. parasanguinis
contig_7_54	AFJ26990.1|CBM48|CBM68|GH13_14	ODP-AF05-68	GH	GH13_14	Strep. parasanguinis
contig_7_56	ALR08738.2|GT83	ODP-AF05-68	GT	GT83	Strep. parasanguinis
contig_8_36	AGL64345.2|GT2	ODP-AF05-68	GT	GT2	Strep. parasanguinis
contig_8_39	QEW09192.1|CE9	ODP-AF05-68	CE	CE9	Strep. parasanguinis
contig_8_45	AWK41767.1|GH13_3	ODP-AF05-68	GH	GH13_3	Strep. parasanguinis
contig_8_59	QEW09214.1|GT51	ODP-AF05-68	GT	GT51	Strep. parasanguinis
contig_9_6	QYO62262.1|GH13	ODP-AF05-68	GH	GH13	Strep. parasanguinis
contig_9_38	AEH56684.1|GH8	ODP-AF05-68	GH	GH8	Strep. parasanguinis
contig_9_39	AFJ25303.1|GT2	ODP-AF05-68	GT	GT2	Strep. parasanguinis
contig_9_42	WEA13229.1|GT0	ODP-AF05-68	GT	GT0	Strep. parasanguinis
contig_9_43	CCO12868.2|GH1	ODP-AF05-68	GH	GH1	Strep. parasanguinis
contig_9_45	QEW08942.1|GT51	ODP-AF05-68	GT	GT51	Strep. parasanguinis
contig_9_58	AEH56661.1|GH20	ODP-AF05-68	GH	GH20	Strep. parasanguinis
contig_9_60	QEW08925.1|GH38	ODP-AF05-68	GH	GH38	Strep. parasanguinis
contig_9_61	QWL81973.1|GH125	ODP-AF05-68	GH	GH125	Strep. parasanguinis
contig_9_62	AEH56657.1|GH92	ODP-AF05-68	GH	GH92	Strep. parasanguinis
contig_10_1	QWL83937.1|GH25	ODP-AF05-68	GH	GH25	Strep. parasanguinis
contig_10_3	AFJ26937.1|GT51	ODP-AF05-68	GT	GT51	Strep. parasanguinis
contig_10_12	QEW10528.1|CBM71|GH2	ODP-AF05-68	CBM	CBM71	Strep. parasanguinis
contig_10_12	QEW10528.1|CBM71|GH2	ODP-AF05-68	GH	GH2	Strep. parasanguinis
contig_10_13	AEH56390.1|GH29	ODP-AF05-68	GH	GH29	Strep. parasanguinis
contig_10_15	AGL63717.2|GT4	ODP-AF05-68	GT	GT4	Strep. parasanguinis
contig_10_25	CAN80640.1|GT47	ODP-AF05-68	GT	GT47	Strep. parasanguinis
contig_10_37	CAI32748.2|GT4	ODP-AF05-68	GT	GT4	Strep. parasanguinis
contig_11_18	QXW96675.1|GT2	ODP-AF05-68	GT	GT2	Strep. parasanguinis
contig_1_11	CAG7911095.1|GH5_11	ODP-AF05-69	GH	GH5_11	Strep. parasanguinis
contig_1_54	QEW09291.1|GT28	ODP-AF05-69	GT	GT28	Strep. parasanguinis
contig_1_66	AGL63717.2|GT4	ODP-AF05-69	GT	GT4	Strep. parasanguinis
contig_1_71	AEH55108.1|GH32	ODP-AF05-69	GH	GH32	Strep. parasanguinis
contig_1_72	CCO11632.2|GH3	ODP-AF05-69	GH	GH3	Strep. parasanguinis
contig_1_90	CCO12633.2|GH84	ODP-AF05-69	GH	GH84	Strep. parasanguinis
contig_1_161	AGL63702.2|GT4	ODP-AF05-69	GT	GT4	Strep. parasanguinis
contig_1_191	QUI22575.1|CBM50	ODP-AF05-69	CBM	CBM50	Strep. parasanguinis
contig_1_201	QEW09479.1|CBM48|GH13_9	ODP-AF05-69	CBM	CBM48	Strep. parasanguinis
contig_1_201	QEW09479.1|CBM48|GH13_9	ODP-AF05-69	GH	GH13_9	Strep. parasanguinis
contig_1_202	BBM21727.1|GH13_9	ODP-AF05-69	GH	GH13_9	Strep. parasanguinis
contig_1_204	QEW09482.1|GT5	ODP-AF05-69	GT	GT5	Strep. parasanguinis
contig_1_212	CAD7245033.1|GT58	ODP-AF05-69	GT	GT58	Strep. parasanguinis
contig_1_244	AWZ17133.1|GH13_30	ODP-AF05-69	GH	GH13_30	Strep. parasanguinis
contig_1_273	QEW09554.1|CE4	ODP-AF05-69	CE	CE4	Strep. parasanguinis
contig_1_276	QWL82724.1|GT2	ODP-AF05-69	GT	GT2	Strep. parasanguinis
contig_1_279	SQH66679.1|GT2	ODP-AF05-69	GT	GT2	Strep. parasanguinis
contig_1_280	VEE19585.1|GT2	ODP-AF05-69	GT	GT2	Strep. parasanguinis
contig_1_281	AFJ25822.1|GT2	ODP-AF05-69	GT	GT2	Strep. parasanguinis
contig_1_283	QEW09562.1|GT4	ODP-AF05-69	GT	GT4	Strep. parasanguinis
contig_1_284	QEW09563.1|GT2	ODP-AF05-69	GT	GT2	Strep. parasanguinis
contig_1_287	AGY39911.1|GT2	ODP-AF05-69	GT	GT2	Strep. parasanguinis
contig_1_288	QEW09567.1|GT0	ODP-AF05-69	GT	GT0	Strep. parasanguinis
contig_1_313	QEW09593.1|CBM41|CBM48|GH13_14	ODP-AF05-69	CBM	CBM41	Strep. parasanguinis
contig_1_313	QEW09593.1|CBM41|CBM48|GH13_14	ODP-AF05-69	CBM	CBM48	Strep. parasanguinis
contig_1_313	QEW09593.1|CBM41|CBM48|GH13_14	ODP-AF05-69	GH	GH13_14	Strep. parasanguinis
contig_1_322	CCO09729.2|GH1	ODP-AF05-69	GH	GH1	Strep. parasanguinis
contig_1_348	AEH55398.1|CBM34|GH13_20	ODP-AF05-69	CBM	CBM34	Strep. parasanguinis
contig_1_348	AEH55398.1|CBM34|GH13_20	ODP-AF05-69	GH	GH13_20	Strep. parasanguinis
contig_1_421	CCO11994.2|GT4	ODP-AF05-69	GT	GT4	Strep. parasanguinis
contig_1_423	BEI59196.1|GH130_1	ODP-AF05-69	GH	GH130_1	Strep. parasanguinis
contig_1_450	WAO96723.1|GH0	ODP-AF05-69	GH	GH0	Strep. parasanguinis
contig_1_454	AGL64700.2|GH23	ODP-AF05-69	GH	GH23	Strep. parasanguinis
contig_1_457	AMJ20543.1|GH13_11	ODP-AF05-69	GH	GH13_11	Strep. parasanguinis
contig_1_459	QWL82947.1|GH23	ODP-AF05-69	GH	GH23	Strep. parasanguinis
contig_1_464	AFJ26032.1|GT1	ODP-AF05-69	GT	GT1	Strep. parasanguinis
contig_1_473	AFJ26040.1|CE7	ODP-AF05-69	CE	CE7	Strep. parasanguinis
contig_1_537	AGL63717.2|GT4	ODP-AF05-69	GT	GT4	Strep. parasanguinis
contig_2_8	QEW09809.1|GH73	ODP-AF05-69	GH	GH73	Strep. parasanguinis
contig_2_36	CAE6204650.1|GH28	ODP-AF05-69	GH	GH28	Strep. parasanguinis
contig_2_117	QEW09913.1|GH1	ODP-AF05-69	GH	GH1	Strep. parasanguinis
contig_2_160	AEH55758.1|GH13_5	ODP-AF05-69	GH	GH13_5	Strep. parasanguinis
contig_2_170	ADN17640.1|GT2	ODP-AF05-69	GT	GT2	Strep. parasanguinis
contig_2_174	AEH55775.1|GH36	ODP-AF05-69	GH	GH36	Strep. parasanguinis
contig_2_175	QEW09974.1|GH13_18	ODP-AF05-69	GH	GH13_18	Strep. parasanguinis
contig_2_179	AEH55780.1|GH36	ODP-AF05-69	GH	GH36	Strep. parasanguinis
contig_2_216	QAY63367.1|GT2	ODP-AF05-69	GT	GT2	Strep. parasanguinis
contig_2_297	CCO11681.2|GH25	ODP-AF05-69	GH	GH25	Strep. parasanguinis
contig_3_2	QXW96675.1|GT2	ODP-AF05-69	GT	GT2	Strep. parasanguinis
contig_3_21	QEW10473.1|GT113	ODP-AF05-69	GT	GT113	Strep. parasanguinis
contig_3_27	QEW10467.1|GT4	ODP-AF05-69	GT	GT4	Strep. parasanguinis
contig_3_28	QEW10466.1|GT8	ODP-AF05-69	GT	GT8	Strep. parasanguinis
contig_3_52	CAD7226128.1|GH38	ODP-AF05-69	GH	GH38	Strep. parasanguinis
contig_3_54	QEW10443.1|CBM32|GH85	ODP-AF05-69	CBM	CBM32	Strep. parasanguinis
contig_3_54	QEW10443.1|CBM32|GH85	ODP-AF05-69	GH	GH85	Strep. parasanguinis
contig_3_103	BBF72686.1|GT2	ODP-AF05-69	GT	GT2	Strep. parasanguinis
contig_3_115	QBQ55156.1|CBM50	ODP-AF05-69	CBM	CBM50	Strep. parasanguinis
contig_3_124	AFJ26729.1|GH43_12	ODP-AF05-69	GH	GH43_12	Strep. parasanguinis
contig_3_126	QUE54032.1|GH3	ODP-AF05-69	GH	GH3	Strep. parasanguinis
contig_3_129	AFJ26727.1|GH78	ODP-AF05-69	GH	GH78	Strep. parasanguinis
contig_3_130	AFJ26726.1|GH3	ODP-AF05-69	GH	GH3	Strep. parasanguinis
contig_3_133	AFJ26723.1|GH2	ODP-AF05-69	GH	GH2	Strep. parasanguinis
contig_3_136	AGY40279.1|GH1	ODP-AF05-69	GH	GH1	Strep. parasanguinis
contig_3_154	AGL64020.2|AA10	ODP-AF05-69	AA	AA10	Strep. parasanguinis
contig_3_163	AEH56192.1|GH31	ODP-AF05-69	GH	GH31	Strep. parasanguinis
contig_3_164	QEW10342.1|GH13_31	ODP-AF05-69	GH	GH13_31	Strep. parasanguinis
contig_3_179	BBD21966.1|GT2	ODP-AF05-69	GT	GT2	Strep. parasanguinis
contig_3_180	QEW10325.1|GT2	ODP-AF05-69	GT	GT2	Strep. parasanguinis
contig_3_193	AFJ26641.1|GH32	ODP-AF05-69	GH	GH32	Strep. parasanguinis
contig_3_194	AGL62906.2|GH13_31	ODP-AF05-69	GH	GH13_31	Strep. parasanguinis
contig_3_217	QEW10286.1|GT8	ODP-AF05-69	GT	GT8	Strep. parasanguinis
contig_3_218	QEW10285.1|GT2	ODP-AF05-69	GT	GT2	Strep. parasanguinis
contig_3_219	QEW10284.1|GT8	ODP-AF05-69	GT	GT8	Strep. parasanguinis
contig_3_220	QEW10283.1|GT4	ODP-AF05-69	GT	GT4	Strep. parasanguinis
contig_4_6	CCO12112.2|GH13_31	ODP-AF05-69	GH	GH13_31	Strep. parasanguinis
contig_4_23	QBQ55251.1|CBM50	ODP-AF05-69	CBM	CBM50	Strep. parasanguinis
contig_4_33	QEW10094.1|GH25	ODP-AF05-69	GH	GH25	Strep. parasanguinis
contig_4_70	CAN65674.1|GH28	ODP-AF05-69	GH	GH28	Strep. parasanguinis
contig_4_71	QWL83445.1|GT4	ODP-AF05-69	GT	GT4	Strep. parasanguinis
contig_4_72	AFJ26454.1|GT4	ODP-AF05-69	GT	GT4	Strep. parasanguinis
contig_4_106	AGL63871.2|GT2	ODP-AF05-69	GT	GT2	Strep. parasanguinis
contig_4_124	CCO10293.2|CBM50	ODP-AF05-69	CBM	CBM50	Strep. parasanguinis
contig_4_136	CCO11054.2|CBM50	ODP-AF05-69	CBM	CBM50	Strep. parasanguinis
contig_4_185	CBA03971.1|GT30	ODP-AF05-69	GT	GT30	Strep. parasanguinis
contig_5_6	CAI32748.2|GT4	ODP-AF05-69	GT	GT4	Strep. parasanguinis
contig_5_18	CAN80640.1|GT47	ODP-AF05-69	GT	GT47	Strep. parasanguinis
contig_5_28	AGL63717.2|GT4	ODP-AF05-69	GT	GT4	Strep. parasanguinis
contig_5_30	AEH56390.1|GH29	ODP-AF05-69	GH	GH29	Strep. parasanguinis
contig_5_31	QEW10528.1|CBM71|GH2	ODP-AF05-69	CBM	CBM71	Strep. parasanguinis
contig_5_31	QEW10528.1|CBM71|GH2	ODP-AF05-69	GH	GH2	Strep. parasanguinis
contig_5_40	AFJ26937.1|GT51	ODP-AF05-69	GT	GT51	Strep. parasanguinis
contig_5_42	QWL83937.1|GH25	ODP-AF05-69	GH	GH25	Strep. parasanguinis
contig_5_43	AGY39024.1|GH25	ODP-AF05-69	GH	GH25	Strep. parasanguinis
contig_5_44	ARC49781.1|GT113	ODP-AF05-69	GT	GT113	Strep. parasanguinis
contig_5_50	VEE18976.1|GT2	ODP-AF05-69	GT	GT2	Strep. parasanguinis
contig_5_51	QTF54836.1|GT0	ODP-AF05-69	GT	GT0	Strep. parasanguinis
contig_5_52	VEE18974.1|GT4	ODP-AF05-69	GT	GT4	Strep. parasanguinis
contig_5_53	VED68047.1|GT26	ODP-AF05-69	GT	GT26	Strep. parasanguinis
contig_5_88	AEH56448.1|GT35	ODP-AF05-69	GT	GT35	Strep. parasanguinis
[truncated: 44,377 more rows]

## Sheet: cazy_class_composition_cancer
Supplementary Table 3: Species-level CAZy class abundance
Species	CAZy_Class	Total_Class_Count	Total	Proportion
Strep. anginosus	AA	2	1209	0.00165426
Strep. anginosus	CBM	127	1209	0.105045
Strep. anginosus	CE	51	1209	0.0421836
Strep. anginosus	GH	692	1209	0.572374
Strep. anginosus	GT	337	1209	0.278743
Strep. constellatus	CBM	123	1108	0.111011
Strep. constellatus	CE	44	1108	0.0397112
Strep. constellatus	GH	610	1108	0.550542
Strep. constellatus	GT	286	1108	0.258123
Strep. constellatus	PL	45	1108	0.0406137
Strep. cristatus	AA	6	324	0.0185185
Strep. cristatus	CBM	39	324	0.12037
Strep. cristatus	CE	18	324	0.0555556
Strep. cristatus	GH	182	324	0.561728
Strep. cristatus	GT	79	324	0.243827
Strep. gordonii	AA	14	1190	0.0117647
Strep. gordonii	CBM	160	1190	0.134454
Strep. gordonii	CE	40	1190	0.0336134
Strep. gordonii	GH	676	1190	0.568067
Strep. gordonii	GT	300	1190	0.252101
Strep. infantis	AA	6	343	0.0174927
Strep. infantis	CBM	41	343	0.119534
Strep. infantis	CE	18	343	0.0524781
Strep. infantis	GH	194	343	0.565598
Strep. infantis	GT	84	343	0.244898
Strep. mitis	AA	23	1866	0.0123258
Strep. mitis	CBM	224	1866	0.120043
Strep. mitis	CE	99	1866	0.0530547
Strep. mitis	GH	1091	1866	0.584673
Strep. mitis	GT	429	1866	0.229904
Strep. oralis	AA	15	3697	0.00405734
Strep. oralis	CBM	419	3697	0.113335
Strep. oralis	CE	183	3697	0.0494996
Strep. oralis	GH	2243	3697	0.606708
Strep. oralis	GT	833	3697	0.225318
Strep. oralis	PL	4	3697	0.00108196
Strep. parasanguinis	AA	24	1458	0.0164609
Strep. parasanguinis	CBM	161	1458	0.110425
Strep. parasanguinis	CE	72	1458	0.0493827
Strep. parasanguinis	GH	839	1458	0.575446
Strep. parasanguinis	GT	362	1458	0.248285
Strep. pseudopneumoniae	AA	2	119	0.0168067
Strep. pseudopneumoniae	CBM	14	119	0.117647
Strep. pseudopneumoniae	CE	6	119	0.0504202
Strep. pseudopneumoniae	GH	71	119	0.596639
Strep. pseudopneumoniae	GT	26	119	0.218487
Strep. rubneri	AA	7	434	0.016129
Strep. rubneri	CBM	48	434	0.110599
Strep. rubneri	CE	21	434	0.0483871
Strep. rubneri	GH	260	434	0.599078
Strep. rubneri	GT	98	434	0.225806
Strep. salivarius	AA	108	5757	0.0187598
Strep. salivarius	CBM	436	5757	0.0757339
Strep. salivarius	CE	326	5757	0.0566267
Strep. salivarius	GH	3447	5757	0.598749
Strep. salivarius	GT	1440	5757	0.25013
Strep. sanguinis	AA	28	1491	0.0187793
Strep. sanguinis	CBM	163	1491	0.109323
Strep. sanguinis	CE	64	1491	0.0429242
Strep. sanguinis	GH	816	1491	0.547284
Strep. sanguinis	GT	420	1491	0.28169
Strep. sinensis	AA	4	266	0.0150376
Strep. sinensis	CBM	35	266	0.131579
Strep. sinensis	CE	15	266	0.056391
Strep. sinensis	GH	149	266	0.56015
Strep. sinensis	GT	63	266	0.236842
Strep. sp001556435	AA	2	108	0.0185185
Strep. sp001556435	CBM	8	108	0.0740741
Strep. sp001556435	CE	6	108	0.0555556
Strep. sp001556435	GH	66	108	0.611111
Strep. sp001556435	GT	26	108	0.240741
Strep. sp013394695	AA	4	232	0.0172414
Strep. sp013394695	CBM	28	232	0.12069
Strep. sp013394695	CE	12	232	0.0517241
Strep. sp013394695	GH	134	232	0.577586
Strep. sp013394695	GT	54	232	0.232759
Strep. vestibularis	AA	2	90	0.0222222
Strep. vestibularis	CBM	6	90	0.0666667
Strep. vestibularis	CE	6	90	0.0666667
Strep. vestibularis	GH	46	90	0.511111
Strep. vestibularis	GT	30	90	0.333333
Strep. xiaochunlingii	AA	10	537	0.018622
Strep. xiaochunlingii	CBM	66	537	0.122905
Strep. xiaochunlingii	CE	30	537	0.0558659
Strep. xiaochunlingii	GH	310	537	0.577281
Strep. xiaochunlingii	GT	121	537	0.225326

## Sheet: CAZ_direction
Supplementary Table 4: Differential CAZyme feature analysis (Cancer vs Healthy)
Species	Feature	p_value	p_adj	Mean_Count_Cancer	Mean_Count_Healthy	Median_Count_Cancer	Median_Count_Healthy	N_Cancer	N_Healthy	Direction	log_p	Metric
Strep. anginosus	CBM	0.50858	0.925094	5.71429	5.8	6	6	7	25	Higher in Healthy	0.033814	CAZyme
Strep. anginosus	CE	0.821688	0.979032	6	6.04	6	6	7	25	Higher in Healthy	0.0092029	CAZyme
Strep. anginosus	GH	0.576217	0.934141	21.4286	22.76	21	21	7	25	Higher in Healthy	0.0295877	CAZyme
Strep. anginosus	GT	0.137883	0.489823	18.5714	17.16	19	17	7	25	Higher in Cancer	0.309961	CAZyme
Strep. anginosus	PL	0.0696424	0.354543	0.285714	0	0	0	7	25	Higher in Cancer	0.450331	CAZyme
Strep. constellatus	CBM	0.583838	0.934141	3.25	3.40909	3	3	4	22	Higher in Healthy	0.0295877	CAZyme
Strep. constellatus	GH	0.248318	0.639888	18	18.5909	17.5	19	4	22	Higher in Healthy	0.193896	CAZyme
Strep. constellatus	GT	0.0157422	0.0979512	18.5	17.5	18.5	18	4	22	Higher in Cancer	1.00899	CAZyme
Strep. cristatus	CBM	0.576999	0.934141	6	7.16667	6	7	1	6	Higher in Healthy	0.0295877	CAZyme
Strep. cristatus	GH	0.795298	0.979032	26	25.6667	26	25	1	6	Higher in Cancer	0.0092029	CAZyme
Strep. cristatus	GT	0.294697	0.703966	22	19.1667	22	18.5	1	6	Higher in Cancer	0.152449	CAZyme
Strep. gordonii	GH	0.251385	0.639888	31.1667	31.9	31	33	6	20	Higher in Healthy	0.193896	CAZyme
Strep. gordonii	GT	0.512106	0.925094	22.5	22.4	23	22	6	20	Higher in Cancer	0.033814	CAZyme
Strep. infantis	CBM	1	1	7.75	6.83333	9	5	8	6	Higher in Cancer	0	CAZyme
Strep. infantis	CE	0.470486	0.925094	6.125	6	6	6	8	6	Higher in Cancer	0.033814	CAZyme
Strep. infantis	GH	0.133295	0.489823	26.375	23	28	20.5	8	6	Higher in Cancer	0.309961	CAZyme
Strep. infantis	GT	0.946048	1	21.125	17.6667	17.5	18	8	6	Higher in Cancer	0	CAZyme
Strep. mitis	CBM	0.00648522	0.0518818	7.4	8.9697	7	10	15	33	Higher in Healthy	1.28499	CAZyme
Strep. mitis	CE	0.00231571	0.0259359	6	6.57576	6	7	15	33	Higher in Healthy	1.5861	CAZyme
Strep. mitis	GH	0.581726	0.934141	28.3333	27.2121	28	29	15	33	Higher in Cancer	0.0295877	CAZyme
Strep. mitis	GT	0.00019843	0.00370402	24.8667	18.2727	25	15	15	33	Higher in Cancer	2.43133	CAZyme
Strep. oralis	CBM	0.724549	0.979032	8.625	8.91803	9	9	8	61	Higher in Healthy	0.0092029	CAZyme
Strep. oralis	CE	0.00203164	0.0259359	6.75	6.09836	6.5	6	8	61	Higher in Cancer	1.5861	CAZyme
Strep. oralis	GH	8.90245e-05	0.00249269	34.75	31.5246	35	33	8	61	Higher in Cancer	2.60333	CAZyme
Strep. oralis	GT	2.85621e-05	0.00159948	16.75	18.9508	17	19	8	61	Higher in Healthy	2.79602	CAZyme
Strep. oralis	PL	0.015066	0.0979512	0.5	0.0655738	0	0	8	61	Higher in Cancer	1.00899	CAZyme
Strep. parasanguinis	CBM	0.963279	1	5.11111	4.79167	4	4	9	24	Higher in Cancer	0	CAZyme
Strep. parasanguinis	CE	0.739401	0.979032	8.22222	8.16667	8	8	9	24	Higher in Cancer	0.0092029	CAZyme
Strep. parasanguinis	GH	0.10327	0.444856	31.7778	35.3333	32	35	9	24	Higher in Healthy	0.35178	CAZyme
Strep. parasanguinis	GT	0.00604942	0.0518818	20.3333	24.5833	20	24	9	24	Higher in Healthy	1.28499	CAZyme
Strep. pseudopneumoniae	CBM	1	1	9	8.5	9	8.5	1	2	Higher in Cancer	0	CAZyme
Strep. pseudopneumoniae	GH	0.666667	0.979032	22	30.5	22	30.5	1	2	Higher in Healthy	0.0092029	CAZyme
Strep. pseudopneumoniae	GT	0.666667	0.979032	29	19.5	29	19.5	1	2	Higher in Cancer	0.0092029	CAZyme
Strep. rubneri	CBM	1	1	8	8.14286	8	8	1	7	Higher in Healthy	0	CAZyme
Strep. rubneri	GH	0.238593	0.639888	34	36.5714	34	38	1	7	Higher in Healthy	0.193896	CAZyme
Strep. rubneri	GT	0.3017	0.703966	27	26.2857	27	26	1	7	Higher in Cancer	0.152449	CAZyme
Strep. salivarius	CE	0.698625	0.979032	7	7.0367	7	7	6	109	Higher in Healthy	0.0092029	CAZyme
Strep. salivarius	GH	1	1	30.5	30.6606	31	31	6	109	Higher in Healthy	0	CAZyme
Strep. salivarius	GT	0.783542	0.979032	29.5	30.1927	30.5	30	6	109	Higher in Healthy	0.0092029	CAZyme
Strep. sanguinis	CBM	0.872396	1	7	6.78571	7	7	2	28	Higher in Cancer	0	CAZyme
Strep. sanguinis	CE	0.80642	0.979032	6.5	6.42857	6.5	6	2	28	Higher in Cancer	0.0092029	CAZyme
Strep. sanguinis	GH	0.767665	0.979032	27	25.8929	27	26	2	28	Higher in Cancer	0.0092029	CAZyme
Strep. sanguinis	GT	0.218618	0.639888	27.5	26.6786	27.5	27	2	28	Higher in Cancer	0.193896	CAZyme
Strep. sinensis	GH	0.504985	0.925094	27	25.8	27	25	1	5	Higher in Cancer	0.033814	CAZyme
Strep. sinensis	GT	0.165857	0.541162	17	18.8	17	19	1	5	Higher in Healthy	0.266672	CAZyme
Strep. sp001556435	GH	0.4795	0.925094	33	30	33	30	1	2	Higher in Cancer	0.033814	CAZyme
Strep. sp001556435	GT	0.4795	0.925094	28	30	28	30	1	2	Higher in Healthy	0.033814	CAZyme
Strep. sp013394695	CBM	1	1	9	8.75	9	9	1	4	Higher in Cancer	0	CAZyme
Strep. sp013394695	GT	0.414216	0.925094	18	17.25	18	17	1	4	Higher in Cancer	0.033814	CAZyme
Strep. vestibularis	GH	0.0955807	0.444856	17	16	17	16	3	2	Higher in Cancer	0.35178	CAZyme
Strep. vestibularis	GT	0.683091	0.979032	22.6667	23	23	23	3	2	Higher in Healthy	0.0092029	CAZyme
Strep. xiaochunlingii	CBM	0.173945	0.541162	3	3.6	3	4	2	10	Higher in Healthy	0.266672	CAZyme
Strep. xiaochunlingii	GH	0.139949	0.489823	28	26.3	28	26.5	2	10	Higher in Cancer	0.309961	CAZyme
Strep. xiaochunlingii	GT	0.0225585	0.126328	20.5	18.6	20.5	19	2	10	Higher in Cancer	0.898501	CAZyme

## Sheet: shannon_species_comparison
Supplementary Table 5: Shannon diversity comparison of CAZyme profiles
Species	Cancer_Mean_Shannon	Healthy_Mean_Shannon	Cancer_Sample_Size	Healthy_Sample_Size	Mann_Whitney_U_Statistic	P_value
parasanguinis	4.05889	4.10582	9	24	54	0.0286434
salivarius	3.98234	3.96613	6	109	422.5	0.22159
infantis	4.04191	4.04529	8	6	22	0.844237
oralis	4.12181	4.10334	8	61	256.5	0.810207
mitis	4.09702	4.03448	15	33	442.5	1.14016e-05
gordonii	4.07744	4.08576	6	20	47	0.430102
sanguinis	3.98898	3.9746	2	28	36	0.496517
xiaochunlingii	3.94153	3.98327	2	10	0.5	0.0465937
anginosus	3.88803	3.8782	7	25	76	0.598181
constellatus	3.9408	3.91879	4	22	57	0.359493
vestibularis	3.82864	3.80666	3	2	6	0.0955807

## Sheet: Wilcoxon_CAzy_Family_Spe_
Supplementary Table 6: Wilcoxon test for species-level CAZyme differences
Species	p_value	FDR
Strep. anginosus	0.598181	0.95709
Strep. constellatus	0.359493	0.821697
Strep. cristatus	1	1
Strep. gordonii	0.430102	0.860204
Strep. infantis	0.844237	1
Strep. mitis	1.14016e-05	0.000182425
Strep. oralis	0.810207	1
Strep. parasanguinis	0.0286434	0.229147
Strep. pseudopneumoniae	0.666667	0.969697
Strep. rubneri	1	1
Strep. salivarius	0.22159	0.590906
Strep. sanguinis	0.496517	0.882697
Strep. sinensis	1	1
Strep. sp001556435	NA	NA
Strep. sp013394695	0.133614	0.427566
Strep. vestibularis	0.0955807	0.382323
Strep. xiaochunlingii	0.0465937	0.2485

## Sheet: cazy_deseq2_results
Supplementary Table 7: Differential CAZy family enrichment (DESeq2-like output)
CAZy_Family	baseMean	log2FoldChange	lfcSE	stat	pvalue	padj	Significant	Direction
AA10	0.731952	0.128469	0.19722	0.651399	0.514789	0.997009	FALSE	Not Significant
CBM32	0.954118	0.45751	0.233657	1.95805	0.0502247	0.208172	FALSE	Not Significant
CBM34	0.586203	0.266045	0.229559	1.15894	0.246481	0.619534	FALSE	Not Significant
CBM40	0.372358	0.771106	0.295177	2.61235	0.00899208	0.0836264	FALSE	Not Significant
CBM41	1.76031	-0.14185	0.130443	-1.08745	0.276837	0.643645	FALSE	Not Significant
CBM47	0.0882583	0.442943	1.19718	0.369988	0.711391	0.997009	FALSE	Not Significant
CBM48	3.15866	-0.0658743	0.0943728	-0.698022	0.485164	0.997009	FALSE	Not Significant
CBM50	9.61031	-0.0967488	0.0551097	-1.75557	0.0791624	0.27267	FALSE	Not Significant
CBM61	0.11561	0.158197	0.646558	0.244676	0.806708	0.997009	FALSE	Not Significant
CBM66	0.377579	-0.767148	0.271415	-2.82648	0.00470628	0.0742227	FALSE	Not Significant
CBM68	0.408878	0.0987963	0.26886	0.367464	0.713273	0.997009	FALSE	Not Significant
CBM70	0.0685652	0.00357044	0.952504	0.00374848	0.997009	0.997009	FALSE	Not Significant
CBM71	0.706998	0.471068	0.213278	2.20871	0.027195	0.180652	FALSE	Not Significant
CE14	0.259872	-0.661618	0.313979	-2.10721	0.0350997	0.198594	FALSE	Not Significant
CE4	1.62281	0.232187	0.125974	1.84314	0.0653082	0.242947	FALSE	Not Significant
CE7	0.500517	0.513166	0.24512	2.09353	0.0363021	0.198594	FALSE	Not Significant
CE9	1.0024	0.000671329	0.16619	0.00403954	0.996777	0.997009	FALSE	Not Significant
GH0	1.29059	-0.34873	0.157758	-2.21053	0.0270683	0.180652	FALSE	Not Significant
GH1	5.1837	0.12938	0.076642	1.68811	0.0913898	0.303545	FALSE	Not Significant
GH101	0.255936	0.119637	0.320628	0.373133	0.709049	0.997009	FALSE	Not Significant
GH125	0.502614	0.505265	0.244425	2.06716	0.0387191	0.200049	FALSE	Not Significant
GH13	2.70875	0.126142	0.0977869	1.28996	0.197063	0.509079	FALSE	Not Significant
GH130	0.394029	0.299789	0.269081	1.11412	0.265228	0.632467	FALSE	Not Significant
GH130_1	1.13299	0.0296266	0.155267	0.19081	0.848674	0.997009	FALSE	Not Significant
GH13_11	1.0024	0.000671326	0.166177	0.00403983	0.996777	0.997009	FALSE	Not Significant
GH13_12	0.757915	-0.344498	0.211006	-1.63264	0.102544	0.328848	FALSE	Not Significant
GH13_14	1.41127	0.0352216	0.139108	0.253195	0.800117	0.997009	FALSE	Not Significant
GH13_18	0.371242	-0.0144618	0.275302	-0.0525307	0.958106	0.997009	FALSE	Not Significant
GH13_20	0.588357	0.259019	0.229484	1.1287	0.259023	0.632467	FALSE	Not Significant
GH13_23	0.995978	-0.0242344	0.167552	-0.144638	0.884997	0.997009	FALSE	Not Significant
GH13_29	1.23759	-0.378467	0.164952	-2.29441	0.0217669	0.168693	FALSE	Not Significant
GH13_3	0.691918	0.0363449	0.207546	0.175117	0.860988	0.997009	FALSE	Not Significant
GH13_30	0.285565	-0.0636366	0.293916	-0.216513	0.828588	0.997009	FALSE	Not Significant
GH13_31	3.24377	0.0354027	0.0918186	0.385572	0.699813	0.997009	FALSE	Not Significant
GH13_5	1.01309	0.0350301	0.164215	0.213319	0.831078	0.997009	FALSE	Not Significant
GH13_9	2.00266	-0.00648739	0.119113	-0.0544639	0.956566	0.997009	FALSE	Not Significant
GH16_21	0.0428075	-0.156986	1.57796	-0.0994863	0.920752	0.997009	FALSE	Not Significant
GH170	0.0299595	0.0725726	1.28822	0.0563354	0.955075	0.997009	FALSE	Not Significant
GH2	0.949516	0.264438	0.167364	1.58002	0.114103	0.35372	FALSE	Not Significant
GH20	1.23513	0.316325	0.170008	1.86066	0.0627928	0.242947	FALSE	Not Significant
GH23	3.33618	0.0531374	0.0915491	0.580425	0.561628	0.997009	FALSE	Not Significant
GH25	4.07869	0.0133987	0.0868302	0.15431	0.877366	0.997009	FALSE	Not Significant
GH27	0.39748	-0.400679	0.268614	-1.49165	0.13579	0.382681	FALSE	Not Significant
GH28	2.00054	-0.0136744	0.119344	-0.114579	0.908779	0.997009	FALSE	Not Significant
GH29	0.779322	0.541416	0.198021	2.73413	0.00625449	0.0742227	FALSE	Not Significant
GH3	1.21447	-0.0358469	0.1523	-0.235371	0.813921	0.997009	FALSE	Not Significant
GH31	0.133087	0.496098	0.575364	0.862233	0.388559	0.857375	FALSE	Not Significant
GH32	2.42756	-0.266249	0.112517	-2.36631	0.0179664	0.151898	FALSE	Not Significant
GH33	0.374509	0.795352	0.293504	2.70985	0.00673138	0.0742227	FALSE	Not Significant
GH35	0.787454	0.278453	0.18419	1.51177	0.130592	0.379532	FALSE	Not Significant
GH36	0.698687	-0.14763	0.224955	-0.656263	0.511655	0.997009	FALSE	Not Significant
GH38	1.50287	0.172498	0.131778	1.30901	0.190531	0.506267	FALSE	Not Significant
GH4	0.0471179	-0.0269484	1.12239	-0.0240098	0.980845	0.997009	FALSE	Not Significant
GH42	0.182575	-0.304905	0.430623	-0.708055	0.478911	0.997009	FALSE	Not Significant
GH43_12	0.0321263	-0.044666	1.30709	-0.0341722	0.97274	0.997009	FALSE	Not Significant
GH53	0.102766	0.132595	0.709697	0.186833	0.851791	0.997009	FALSE	Not Significant
GH5_11	1.00668	0.0289546	0.164941	0.175546	0.860651	0.997009	FALSE	Not Significant
GH66	0.298519	-0.439004	0.286205	-1.53388	0.12506	0.375179	FALSE	Not Significant
GH68	0.26839	-0.693152	0.322814	-2.14722	0.0317757	0.197009	FALSE	Not Significant
GH70	2.03121	-1.80985	0.322598	-5.61022	2.02065e-08	1.87921e-06	TRUE	Enriched in Healthy
GH73	2.50941	-0.480187	0.122169	-3.93053	8.4759e-05	0.00197065	TRUE	Enriched in Healthy
GH77	1.01307	0.035025	0.164227	0.213272	0.831115	0.997009	FALSE	Not Significant
GH78	0.0578254	0.0065381	1.33368	0.00490232	0.996089	0.997009	FALSE	Not Significant
GH8	0.570787	-0.673572	0.249878	-2.6956	0.00702617	0.0742227	FALSE	Not Significant
GH84	1.27556	0.133803	0.143712	0.931052	0.351827	0.798046	FALSE	Not Significant
GH85	0.440111	0.516544	0.260028	1.98649	0.0469784	0.208047	FALSE	Not Significant
GH87	0.276936	-0.542427	0.306646	-1.7689	0.0769099	0.27267	FALSE	Not Significant
GH88	0.070728	0.0685902	0.914781	0.0749799	0.940231	0.997009	FALSE	Not Significant
GH92	1.04332	0.0679117	0.161684	0.420027	0.674466	0.997009	FALSE	Not Significant
GH94	0.0428075	-0.156986	1.57796	-0.0994863	0.920752	0.997009	FALSE	Not Significant
GH95	0.384926	0.555212	0.272077	2.04064	0.0412862	0.202085	FALSE	Not Significant
GT0	1.73354	-0.274954	0.138365	-1.98716	0.0469046	0.208047	FALSE	Not Significant
GT1	0.793241	0.112727	0.198788	0.567072	0.570665	0.997009	FALSE	Not Significant
GT101	0.35844	0.0328397	0.281592	0.116621	0.90716	0.997009	FALSE	Not Significant
GT11	0.0215189	0.213462	1.34743	0.158422	0.874124	0.997009	FALSE	Not Significant
GT111	0.0817747	0.284334	0.837765	0.339397	0.734311	0.997009	FALSE	Not Significant
GT113	1.0111	-0.145663	0.171767	-0.848031	0.396421	0.857375	FALSE	Not Significant
GT2	14.2223	-0.186606	0.0463792	-4.02348	5.73435e-05	0.00177765	TRUE	Enriched in Healthy
GT26	0.260002	-0.00548542	0.319016	-0.0171948	0.986281	0.997009	FALSE	Not Significant
GT28	1.0024	0.000671326	0.166177	0.00403983	0.996777	0.997009	FALSE	Not Significant
GT30	0.736065	0.367025	0.188467	1.94743	0.0514833	0.208172	FALSE	Not Significant
GT32	0.0558565	0.233131	1.04152	0.223837	0.822884	0.997009	FALSE	Not Significant
GT35	1.5534	-0.189653	0.138787	-1.3665	0.171782	0.469874	FALSE	Not Significant
GT4	13.8808	-0.121852	0.0453278	-2.68825	0.00718284	0.0742227	FALSE	Not Significant
GT47	1.00029	-0.0136733	0.166822	-0.0819634	0.934676	0.997009	FALSE	Not Significant
GT5	1.0024	0.000671326	0.166177	0.00403983	0.996777	0.997009	FALSE	Not Significant
GT51	3.02644	0.02502	0.0944194	0.264988	0.791018	0.997009	FALSE	Not Significant
GT52	0.0775403	0.701071	1.03699	0.676065	0.498999	0.997009	FALSE	Not Significant
GT58	1.0024	0.000671326	0.166177	0.00403983	0.996777	0.997009	FALSE	Not Significant
GT8	3.51873	-0.692225	0.155721	-4.44529	8.77714e-06	0.000408137	TRUE	Enriched in Healthy
GT83	1.28925	-0.0132653	0.146697	-0.0904266	0.927948	0.997009	FALSE	Not Significant
PL12_1	0.070728	0.0685902	0.914781	0.0749799	0.940231	0.997009	FALSE	Not Significant
PL8_1	0.0685738	0.0400221	0.931499	0.0429653	0.965729	0.997009	FALSE	Not Significant
