# Supplementary material for: The Genomic Landscape of Head and Neck Cancer-associated Streptococci
Source: Research Square preprint supplement (doi:10.21203/rs.3.rs-8400357/v1), 2026-01-09
Supplement: Supplementary file 10 [file d322db9239df7d067b67f505.xlsx]

## Sheet: Significant_Genes_speci
Supplementary Table 1: Differential gene frequency analysis (with group classification)
Gene	Freq_Healthy	Freq_Cancer	Freq_Diff	PValue	AdjPValue	Group
ald	0.976471	0.835821	0.14065	2.86811e-05	0.00456859	More in Healthy
sprT	0.755882	0.910448	-0.154565	0.00360491	0.0358048	More in Cancer
glmS	0.732353	0.925373	-0.19302	0.000425873	0.0162614	More in Cancer
group_14900	0.952941	0.791045	0.161896	5.13045e-05	0.00470878	More in Healthy
sitB...fhuC...scaC...znuC	0.679412	0.910448	-0.231036	4.8405e-05	0.00457333	More in Cancer
scaB...znuB	0.679412	0.910448	-0.231036	4.8405e-05	0.00457333	More in Cancer
fimA...ssaB...scaA...psaA	0.679412	0.910448	-0.231036	4.8405e-05	0.00457333	More in Cancer
scaR...mntR...ideR...marR	0.679412	0.910448	-0.231036	4.8405e-05	0.00457333	More in Cancer
group_15985	0.673529	0.865672	-0.192142	0.00118961	0.0162614	More in Cancer
lacI...ccpA	0.673529	0.865672	-0.192142	0.00118961	0.0162614	More in Cancer
group_16689	0.673529	0.865672	-0.192142	0.00118961	0.0162614	More in Cancer
group_16654	0.673529	0.865672	-0.192142	0.00118961	0.0162614	More in Cancer
group_16645	0.673529	0.865672	-0.192142	0.00118961	0.0162614	More in Cancer
group_16644	0.673529	0.865672	-0.192142	0.00118961	0.0162614	More in Cancer
group_16640	0.673529	0.865672	-0.192142	0.00118961	0.0162614	More in Cancer
msrB...msrA...msrAB...msrAB1	0.673529	0.865672	-0.192142	0.00118961	0.0162614	More in Cancer
group_16601	0.673529	0.865672	-0.192142	0.00118961	0.0162614	More in Cancer
group_16599	0.673529	0.865672	-0.192142	0.00118961	0.0162614	More in Cancer
ysxB	0.673529	0.865672	-0.192142	0.00118961	0.0162614	More in Cancer
group_16597	0.673529	0.865672	-0.192142	0.00118961	0.0162614	More in Cancer
tmpC	0.673529	0.865672	-0.192142	0.00118961	0.0162614	More in Cancer
group_16462	0.673529	0.865672	-0.192142	0.00118961	0.0162614	More in Cancer
group_16461	0.673529	0.865672	-0.192142	0.00118961	0.0162614	More in Cancer
group_16434	0.673529	0.865672	-0.192142	0.00118961	0.0162614	More in Cancer
group_16376	0.673529	0.865672	-0.192142	0.00118961	0.0162614	More in Cancer
group_16312	0.673529	0.865672	-0.192142	0.00118961	0.0162614	More in Cancer
group_16280	0.673529	0.865672	-0.192142	0.00118961	0.0162614	More in Cancer
group_16279	0.673529	0.865672	-0.192142	0.00118961	0.0162614	More in Cancer
group_16259	0.673529	0.865672	-0.192142	0.00118961	0.0162614	More in Cancer
group_16247	0.673529	0.865672	-0.192142	0.00118961	0.0162614	More in Cancer
group_16144	0.673529	0.865672	-0.192142	0.00118961	0.0162614	More in Cancer
group_16043	0.673529	0.865672	-0.192142	0.00118961	0.0162614	More in Cancer
group_16034	0.673529	0.865672	-0.192142	0.00118961	0.0162614	More in Cancer
group_16014	0.673529	0.865672	-0.192142	0.00118961	0.0162614	More in Cancer
ptsI...ptsP	0.673529	0.865672	-0.192142	0.00118961	0.0162614	More in Cancer
group_15982	0.673529	0.865672	-0.192142	0.00118961	0.0162614	More in Cancer
group_15962	0.673529	0.865672	-0.192142	0.00118961	0.0162614	More in Cancer
group_15960	0.673529	0.865672	-0.192142	0.00118961	0.0162614	More in Cancer
group_15939	0.673529	0.865672	-0.192142	0.00118961	0.0162614	More in Cancer
amiF...oppF	0.673529	0.865672	-0.192142	0.00118961	0.0162614	More in Cancer
group_15891	0.673529	0.865672	-0.192142	0.00118961	0.0162614	More in Cancer
group_15859	0.673529	0.865672	-0.192142	0.00118961	0.0162614	More in Cancer
group_15823	0.673529	0.865672	-0.192142	0.00118961	0.0162614	More in Cancer
yfkJ...wzb	0.673529	0.865672	-0.192142	0.00118961	0.0162614	More in Cancer
group_15770	0.673529	0.865672	-0.192142	0.00118961	0.0162614	More in Cancer
smpB...tehB	0.673529	0.865672	-0.192142	0.00118961	0.0162614	More in Cancer
group_15762	0.673529	0.865672	-0.192142	0.00118961	0.0162614	More in Cancer
group_15748	0.673529	0.865672	-0.192142	0.00118961	0.0162614	More in Cancer
group_15724	0.673529	0.865672	-0.192142	0.00118961	0.0162614	More in Cancer
group_15712	0.673529	0.865672	-0.192142	0.00118961	0.0162614	More in Cancer
group_15574	0.673529	0.865672	-0.192142	0.00118961	0.0162614	More in Cancer
oppD...amiE	0.673529	0.865672	-0.192142	0.00118961	0.0162614	More in Cancer
arlR...csrR...ompR	0.673529	0.865672	-0.192142	0.00118961	0.0162614	More in Cancer
group_15516	0.673529	0.865672	-0.192142	0.00118961	0.0162614	More in Cancer
group_15499	0.673529	0.865672	-0.192142	0.00118961	0.0162614	More in Cancer
group_15496	0.673529	0.865672	-0.192142	0.00118961	0.0162614	More in Cancer
group_15495	0.673529	0.865672	-0.192142	0.00118961	0.0162614	More in Cancer
gndA	0.673529	0.865672	-0.192142	0.00118961	0.0162614	More in Cancer
group_15383	0.673529	0.865672	-0.192142	0.00118961	0.0162614	More in Cancer
group_15382	0.673529	0.865672	-0.192142	0.00118961	0.0162614	More in Cancer
group_15372	0.673529	0.865672	-0.192142	0.00118961	0.0162614	More in Cancer
oppC	0.673529	0.865672	-0.192142	0.00118961	0.0162614	More in Cancer
oppB...gsiC...amiC	0.673529	0.865672	-0.192142	0.00118961	0.0162614	More in Cancer
group_15131	0.673529	0.865672	-0.192142	0.00118961	0.0162614	More in Cancer
fieF...mntE	0.673529	0.865672	-0.192142	0.00118961	0.0162614	More in Cancer
group_14869	0.673529	0.865672	-0.192142	0.00118961	0.0162614	More in Cancer
prs...prs2	0.673529	0.865672	-0.192142	0.00118961	0.0162614	More in Cancer
group_14052	0.673529	0.865672	-0.192142	0.00118961	0.0162614	More in Cancer
group_13677	0.673529	0.865672	-0.192142	0.00118961	0.0162614	More in Cancer
group_13496	0.673529	0.865672	-0.192142	0.00118961	0.0162614	More in Cancer
group_13286	0.673529	0.865672	-0.192142	0.00118961	0.0162614	More in Cancer
group_13183	0.673529	0.865672	-0.192142	0.00118961	0.0162614	More in Cancer
group_12949	0.673529	0.865672	-0.192142	0.00118961	0.0162614	More in Cancer
ydhJ	0.673529	0.865672	-0.192142	0.00118961	0.0162614	More in Cancer
group_12768	0.673529	0.865672	-0.192142	0.00118961	0.0162614	More in Cancer
group_12753	0.673529	0.865672	-0.192142	0.00118961	0.0162614	More in Cancer
group_11672	0.673529	0.865672	-0.192142	0.00118961	0.0162614	More in Cancer
uppP	0.673529	0.865672	-0.192142	0.00118961	0.0162614	More in Cancer
group_10172	0.673529	0.865672	-0.192142	0.00118961	0.0162614	More in Cancer
group_10058	0.673529	0.865672	-0.192142	0.00118961	0.0162614	More in Cancer
fabG	0.673529	0.865672	-0.192142	0.00118961	0.0162614	More in Cancer
group_9312	0.673529	0.865672	-0.192142	0.00118961	0.0162614	More in Cancer
atpF	0.673529	0.865672	-0.192142	0.00118961	0.0162614	More in Cancer
group_8806	0.673529	0.865672	-0.192142	0.00118961	0.0162614	More in Cancer
rpsP	0.673529	0.865672	-0.192142	0.00118961	0.0162614	More in Cancer
khpA	0.673529	0.865672	-0.192142	0.00118961	0.0162614	More in Cancer
group_15971	0.673529	0.865672	-0.192142	0.00118961	0.0162614	More in Cancer
group_15890	0.670588	0.865672	-0.195083	0.0011641	0.0162614	More in Cancer
group_15829	0.673529	0.865672	-0.192142	0.00118961	0.0162614	More in Cancer
group_15723	0.673529	0.865672	-0.192142	0.00118961	0.0162614	More in Cancer
group_15066	0.673529	0.850746	-0.177217	0.0032904	0.0343989	More in Cancer
group_14757	0.670588	0.865672	-0.195083	0.0011641	0.0162614	More in Cancer
group_14615	0.673529	0.850746	-0.177217	0.0032904	0.0343989	More in Cancer
group_13492	0.673529	0.865672	-0.192142	0.00118961	0.0162614	More in Cancer
group_13263	0.679412	0.865672	-0.18626	0.00181476	0.0217144	More in Cancer
skfE...ccmA	0.670588	0.865672	-0.195083	0.0011641	0.0162614	More in Cancer
group_12866	0.676471	0.865672	-0.189201	0.00181723	0.0217144	More in Cancer
group_16580	0.673529	0.865672	-0.192142	0.00118961	0.0162614	More in Cancer
group_16362	0.673529	0.865672	-0.192142	0.00118961	0.0162614	More in Cancer
group_16351	0.673529	0.865672	-0.192142	0.00118961	0.0162614	More in Cancer
fabZ...fatA	0.673529	0.865672	-0.192142	0.00118961	0.0162614	More in Cancer
group_16184	0.673529	0.850746	-0.177217	0.0032904	0.0343989	More in Cancer
group_15998	0.673529	0.865672	-0.192142	0.00118961	0.0162614	More in Cancer
pTC1...phpP	0.673529	0.865672	-0.192142	0.00118961	0.0162614	More in Cancer
group_15895	0.673529	0.865672	-0.192142	0.00118961	0.0162614	More in Cancer
group_15806	0.673529	0.865672	-0.192142	0.00118961	0.0162614	More in Cancer
acuB...cBS	0.673529	0.865672	-0.192142	0.00118961	0.0162614	More in Cancer
group_15572	0.673529	0.865672	-0.192142	0.00118961	0.0162614	More in Cancer
group_15571	0.673529	0.865672	-0.192142	0.00118961	0.0162614	More in Cancer
group_15481	0.673529	0.865672	-0.192142	0.00118961	0.0162614	More in Cancer
group_15475	0.673529	0.865672	-0.192142	0.00118961	0.0162614	More in Cancer
group_15389	0.673529	0.865672	-0.192142	0.00118961	0.0162614	More in Cancer
gorA...gor	0.673529	0.865672	-0.192142	0.00118961	0.0162614	More in Cancer
glpE...moeZ...pspE	0.673529	0.865672	-0.192142	0.00118961	0.0162614	More in Cancer
spxR...fabZ	0.673529	0.865672	-0.192142	0.00118961	0.0162614	More in Cancer
yqgQ	0.673529	0.865672	-0.192142	0.00118961	0.0162614	More in Cancer
group_15156	0.673529	0.865672	-0.192142	0.00118961	0.0162614	More in Cancer
group_15102	0.673529	0.865672	-0.192142	0.00118961	0.0162614	More in Cancer
rodA...ftsW	0.673529	0.865672	-0.192142	0.00118961	0.0162614	More in Cancer
sepM...coaD...sdrC	0.673529	0.865672	-0.192142	0.00118961	0.0162614	More in Cancer
vraR...liaR...citB	0.673529	0.865672	-0.192142	0.00118961	0.0162614	More in Cancer
group_14853	0.673529	0.865672	-0.192142	0.00118961	0.0162614	More in Cancer
ylbF	0.673529	0.865672	-0.192142	0.00118961	0.0162614	More in Cancer
group_14689	0.673529	0.865672	-0.192142	0.00118961	0.0162614	More in Cancer
livM	0.673529	0.865672	-0.192142	0.00118961	0.0162614	More in Cancer
group_14531	0.673529	0.865672	-0.192142	0.00118961	0.0162614	More in Cancer
group_14443	0.670588	0.865672	-0.195083	0.0011641	0.0162614	More in Cancer
group_14342	0.673529	0.865672	-0.192142	0.00118961	0.0162614	More in Cancer
group_14327	0.673529	0.865672	-0.192142	0.00118961	0.0162614	More in Cancer
group_14323	0.673529	0.865672	-0.192142	0.00118961	0.0162614	More in Cancer
group_14293	0.673529	0.865672	-0.192142	0.00118961	0.0162614	More in Cancer
group_14117	0.673529	0.865672	-0.192142	0.00118961	0.0162614	More in Cancer
group_14102	0.673529	0.865672	-0.192142	0.00118961	0.0162614	More in Cancer
ccrZ	0.673529	0.865672	-0.192142	0.00118961	0.0162614	More in Cancer
group_13927	0.673529	0.865672	-0.192142	0.00118961	0.0162614	More in Cancer
cca...pcnB	0.673529	0.865672	-0.192142	0.00118961	0.0162614	More in Cancer
ccmA...uup	0.673529	0.865672	-0.192142	0.00118961	0.0162614	More in Cancer
group_13794	0.673529	0.865672	-0.192142	0.00118961	0.0162614	More in Cancer
pgl	0.673529	0.865672	-0.192142	0.00118961	0.0162614	More in Cancer
group_13748	0.673529	0.865672	-0.192142	0.00118961	0.0162614	More in Cancer
kefA...ykuT...mscS	0.673529	0.865672	-0.192142	0.00118961	0.0162614	More in Cancer
group_13718	0.673529	0.865672	-0.192142	0.00118961	0.0162614	More in Cancer
group_13691	0.673529	0.865672	-0.192142	0.00118961	0.0162614	More in Cancer
group_13683	0.673529	0.865672	-0.192142	0.00118961	0.0162614	More in Cancer
group_13681	0.673529	0.865672	-0.192142	0.00118961	0.0162614	More in Cancer
group_13672	0.673529	0.865672	-0.192142	0.00118961	0.0162614	More in Cancer
group_13658	0.673529	0.865672	-0.192142	0.00118961	0.0162614	More in Cancer
group_13631	0.673529	0.865672	-0.192142	0.00118961	0.0162614	More in Cancer
group_13615	0.673529	0.865672	-0.192142	0.00118961	0.0162614	More in Cancer
group_13605	0.673529	0.865672	-0.192142	0.00118961	0.0162614	More in Cancer
group_13597	0.673529	0.865672	-0.192142	0.00118961	0.0162614	More in Cancer
group_13553	0.673529	0.865672	-0.192142	0.00118961	0.0162614	More in Cancer
group_13551	0.673529	0.865672	-0.192142	0.00118961	0.0162614	More in Cancer
recD...yrrC	0.673529	0.865672	-0.192142	0.00118961	0.0162614	More in Cancer
ybjI...cof	0.673529	0.865672	-0.192142	0.00118961	0.0162614	More in Cancer
group_13464	0.673529	0.865672	-0.192142	0.00118961	0.0162614	More in Cancer
yjjP	0.673529	0.865672	-0.192142	0.00118961	0.0162614	More in Cancer
group_13209	0.673529	0.865672	-0.192142	0.00118961	0.0162614	More in Cancer
group_13203	0.673529	0.865672	-0.192142	0.00118961	0.0162614	More in Cancer
group_13194	0.673529	0.865672	-0.192142	0.00118961	0.0162614	More in Cancer
thrE...yjjB	0.673529	0.865672	-0.192142	0.00118961	0.0162614	More in Cancer
yidA...cof	0.673529	0.865672	-0.192142	0.00118961	0.0162614	More in Cancer
group_13155	0.673529	0.865672	-0.192142	0.00118961	0.0162614	More in Cancer
zwf	0.673529	0.865672	-0.192142	0.00118961	0.0162614	More in Cancer
group_13082	0.673529	0.865672	-0.192142	0.00118961	0.0162614	More in Cancer
yigL...cof	0.673529	0.865672	-0.192142	0.00118961	0.0162614	More in Cancer
group_12997	0.673529	0.865672	-0.192142	0.00118961	0.0162614	More in Cancer
group_12955	0.673529	0.865672	-0.192142	0.00118961	0.0162614	More in Cancer
group_12935	0.673529	0.865672	-0.192142	0.00118961	0.0162614	More in Cancer
aliA...sarA...aliB...oppA	0.667647	0.865672	-0.198025	0.00116868	0.0162614	More in Cancer
slmA...tetR...acrR	0.673529	0.865672	-0.192142	0.00118961	0.0162614	More in Cancer
group_12781	0.673529	0.865672	-0.192142	0.00118961	0.0162614	More in Cancer
group_12276	0.673529	0.865672	-0.192142	0.00118961	0.0162614	More in Cancer
group_12257	0.673529	0.865672	-0.192142	0.00118961	0.0162614	More in Cancer
group_11555	0.673529	0.865672	-0.192142	0.00118961	0.0162614	More in Cancer
group_11201	0.673529	0.865672	-0.192142	0.00118961	0.0162614	More in Cancer
group_11130	0.673529	0.865672	-0.192142	0.00118961	0.0162614	More in Cancer
group_8829	0.673529	0.865672	-0.192142	0.00118961	0.0162614	More in Cancer
group_8075	0.673529	0.865672	-0.192142	0.00118961	0.0162614	More in Cancer
gntR...ubiC	0.673529	0.865672	-0.192142	0.00118961	0.0162614	More in Cancer
group_6885	0.673529	0.865672	-0.192142	0.00118961	0.0162614	More in Cancer
group_5015	0.673529	0.865672	-0.192142	0.00118961	0.0162614	More in Cancer
group_16139	0.673529	0.865672	-0.192142	0.00118961	0.0162614	More in Cancer
dadA...hcnC	0.673529	0.865672	-0.192142	0.00118961	0.0162614	More in Cancer
group_15782	0.673529	0.865672	-0.192142	0.00118961	0.0162614	More in Cancer
group_15619	0.670588	0.865672	-0.195083	0.0011641	0.0162614	More in Cancer
group_15563	0.673529	0.850746	-0.177217	0.0032904	0.0343989	More in Cancer
group_15283	0.673529	0.865672	-0.192142	0.00118961	0.0162614	More in Cancer
group_15273	0.673529	0.865672	-0.192142	0.00118961	0.0162614	More in Cancer
yigZ...yIH1	0.673529	0.865672	-0.192142	0.00118961	0.0162614	More in Cancer
group_14485	0.670588	0.865672	-0.195083	0.0011641	0.0162614	More in Cancer
comGB...comGA...gspF	0.670588	0.865672	-0.195083	0.0011641	0.0162614	More in Cancer
tVP38	0.670588	0.865672	-0.195083	0.0011641	0.0162614	More in Cancer
group_12965	0.673529	0.865672	-0.192142	0.00118961	0.0162614	More in Cancer
gloB	0.673529	0.865672	-0.192142	0.00118961	0.0162614	More in Cancer
group_12577	0.673529	0.865672	-0.192142	0.00118961	0.0162614	More in Cancer
oatA...oafA	0.673529	0.865672	-0.192142	0.00118961	0.0162614	More in Cancer
group_12240	0.670588	0.865672	-0.195083	0.0011641	0.0162614	More in Cancer
group_11996	0.670588	0.865672	-0.195083	0.0011641	0.0162614	More in Cancer
pvaA...mltE...pmp23	0.670588	0.865672	-0.195083	0.0011641	0.0162614	More in Cancer
group_11814	0.673529	0.865672	-0.192142	0.00118961	0.0162614	More in Cancer
group_11688	0.673529	0.850746	-0.177217	0.0032904	0.0343989	More in Cancer
group_14993	0.670588	0.850746	-0.180158	0.00326102	0.034271	More in Cancer
group_14918	0.667647	0.865672	-0.198025	0.00116868	0.0162614	More in Cancer
group_14887	0.667647	0.865672	-0.198025	0.00116868	0.0162614	More in Cancer
galT...galT2	0.673529	0.865672	-0.192142	0.00118961	0.0162614	More in Cancer
group_14092	0.670588	0.865672	-0.195083	0.0011641	0.0162614	More in Cancer
ytgP...spoVB	0.667647	0.865672	-0.198025	0.00116868	0.0162614	More in Cancer
patB...malY	0.667647	0.865672	-0.198025	0.00116868	0.0162614	More in Cancer
group_13034	0.673529	0.865672	-0.192142	0.00118961	0.0162614	More in Cancer
group_15224	0.673529	0.850746	-0.177217	0.0032904	0.0343989	More in Cancer
ganA	0.664706	0.865672	-0.200966	0.000752377	0.0162614	More in Cancer
htrA...degP...degQ	0.664706	0.865672	-0.200966	0.000752377	0.0162614	More in Cancer
gpmB2	0.673529	0.850746	-0.177217	0.0032904	0.0343989	More in Cancer
group_16647	0.673529	0.865672	-0.192142	0.00118961	0.0162614	More in Cancer
group_15864	0.673529	0.865672	-0.192142	0.00118961	0.0162614	More in Cancer
group_14350	0.670588	0.865672	-0.195083	0.0011641	0.0162614	More in Cancer
ywnA...iscR	0.667647	0.850746	-0.183099	0.00221614	0.0254857	More in Cancer
group_14491	0.673529	0.865672	-0.192142	0.00118961	0.0162614	More in Cancer
lytR...epsA...ywtF...cps2a...cps4A	0.670588	0.850746	-0.180158	0.00326102	0.034271	More in Cancer
rimL...ydaF	0.664706	0.835821	-0.171115	0.00561634	0.0454257	More in Cancer
agaS	0.635294	0.850746	-0.215452	0.000551761	0.0162614	More in Cancer
group_9997	0.635294	0.850746	-0.215452	0.000551761	0.0162614	More in Cancer
group_9842	0.635294	0.850746	-0.215452	0.000551761	0.0162614	More in Cancer
group_9635	0.635294	0.850746	-0.215452	0.000551761	0.0162614	More in Cancer
group_9335	0.632353	0.850746	-0.218393	0.000353364	0.0148326	More in Cancer
cps4B...cpsB	0.667647	0.850746	-0.183099	0.00221614	0.0254857	More in Cancer
cwlO	0.673529	0.865672	-0.192142	0.00118961	0.0162614	More in Cancer
prs1	0.673529	0.865672	-0.192142	0.00118961	0.0162614	More in Cancer
group_15207	0.65	0.865672	-0.215672	0.000303092	0.0129818	More in Cancer
pdhA...acoA	0.647059	0.865672	-0.218613	0.00028912	0.012499	More in Cancer
group_10143	0.647059	0.865672	-0.218613	0.00028912	0.012499	More in Cancer
prfB	0.632353	0.850746	-0.218393	0.000353364	0.0148326	More in Cancer
group_16015	0.608824	0.820896	-0.212072	0.000753741	0.0162614	More in Cancer
group_13514	0.608824	0.80597	-0.197147	0.00203548	0.0235485	More in Cancer
group_14116	0.608824	0.820896	-0.212072	0.000753741	0.0162614	More in Cancer
group_12898	0.632353	0.850746	-0.218393	0.000353364	0.0148326	More in Cancer
pgi	0.614706	0.835821	-0.221115	0.000405025	0.0162614	More in Cancer
group_16042	0.608824	0.820896	-0.212072	0.000753741	0.0162614	More in Cancer
group_14971	0.602941	0.791045	-0.188104	0.00343673	0.0358048	More in Cancer
nanE	0.602941	0.791045	-0.188104	0.00343673	0.0358048	More in Cancer
ytpP...trxA	0.588235	0.850746	-0.262511	2.57777e-05	0.00424649	More in Cancer
group_16414	0.605882	0.820896	-0.215013	0.000736051	0.0162614	More in Cancer
group_15150	0.602941	0.791045	-0.188104	0.00343673	0.0358048	More in Cancer
malD	0.591176	0.835821	-0.244644	9.29666e-05	0.0059768	More in Cancer
malC	0.591176	0.835821	-0.244644	9.29666e-05	0.0059768	More in Cancer
malX	0.591176	0.835821	-0.244644	9.29666e-05	0.0059768	More in Cancer
phoU...nptA	0.591176	0.835821	-0.244644	9.29666e-05	0.0059768	More in Cancer
guaC	0.591176	0.835821	-0.244644	9.29666e-05	0.0059768	More in Cancer
rfbA	0.902941	0.716418	0.186523	0.000167712	0.0085742	More in Healthy
rfbB	0.905882	0.716418	0.189464	0.000143312	0.00744529	More in Healthy
group_15271	0.594118	0.835821	-0.241703	0.000147023	0.00756524	More in Cancer
rfbC	0.902941	0.716418	0.186523	0.000167712	0.0085742	More in Healthy
group_9669	0.6	0.820896	-0.220896	0.000469742	0.0162614	More in Cancer
ptsN	0.585294	0.776119	-0.190825	0.00367603	0.0358048	More in Cancer
group_9866	0.6	0.791045	-0.191045	0.00339246	0.0354205	More in Cancer
group_8517	0.582353	0.80597	-0.223617	0.000517447	0.0162614	More in Cancer
iscS...nifS	0.591176	0.835821	-0.244644	9.29666e-05	0.0059768	More in Cancer
jag...khpB	0.644118	0.835821	-0.191703	0.00168028	0.0217144	More in Cancer
catE	0.835294	0.641791	0.193503	0.000633633	0.0162614	More in Healthy
yidC...yidC2	0.644118	0.835821	-0.191703	0.00168028	0.0217144	More in Cancer
group_13773	0.644118	0.835821	-0.191703	0.00168028	0.0217144	More in Cancer
trpB	0.570588	0.820896	-0.250307	0.000100451	0.0059768	More in Cancer
group_14037	0.597059	0.850746	-0.253687	4.48541e-05	0.00457333	More in Cancer
macB...lolD	0.564706	0.80597	-0.241264	0.000191836	0.00920844	More in Cancer
bglB...gmuD...bglA	0.576471	0.761194	-0.184723	0.0058879	0.0475622	More in Cancer
ydaF...rimL	0.605882	0.80597	-0.200088	0.00202059	0.0233903	More in Cancer
group_13589	0.532353	0.746269	-0.213916	0.00116893	0.0162614	More in Cancer
glnR...merR	0.532353	0.731343	-0.19899	0.00289028	0.0315622	More in Cancer
group_13502	0.532353	0.731343	-0.19899	0.00289028	0.0315622	More in Cancer
tsaC	0.535294	0.761194	-0.2259	0.000661344	0.0162614	More in Cancer
group_10870	0.526471	0.716418	-0.189947	0.00458843	0.037956	More in Cancer
group_15617	0.467647	0.701493	-0.233845	0.000481929	0.0162614	More in Cancer
group_14638	0.561765	0.80597	-0.244205	0.000189573	0.00920844	More in Cancer
msbA...marR	0.558824	0.776119	-0.217296	0.000985942	0.0162614	More in Cancer
group_13918	0.514706	0.701493	-0.186787	0.00493123	0.040239	More in Cancer
group_13020	0.794118	0.61194	0.182177	0.00248449	0.0284359	More in Healthy
group_14100	0.45	0.656716	-0.206716	0.00209475	0.0241184	More in Cancer
lacC...pfkB	0.452941	0.686567	-0.233626	0.000489804	0.0162614	More in Cancer
group_13281	0.535294	0.746269	-0.210975	0.0017506	0.0217144	More in Cancer
ylqF	0.526471	0.716418	-0.189947	0.00458843	0.037956	More in Cancer
yesN	0.441176	0.656716	-0.21554	0.00131663	0.0177335	More in Cancer
group_13305	0.420588	0.641791	-0.221203	0.0011811	0.0162614	More in Cancer
group_13065	0.761765	0.552239	0.209526	0.000835763	0.0162614	More in Healthy
znuC...drrA	0.75	0.522388	0.227612	0.000332964	0.0141981	More in Healthy
group_14541	0.441176	0.656716	-0.21554	0.00131663	0.0177335	More in Cancer
group_14022	0.426471	0.686567	-0.260097	0.000147191	0.00756524	More in Cancer
group_13834	0.441176	0.656716	-0.21554	0.00131663	0.0177335	More in Cancer
mngB	0.441176	0.656716	-0.21554	0.00131663	0.0177335	More in Cancer
group_13614	0.441176	0.656716	-0.21554	0.00131663	0.0177335	More in Cancer
group_14906	0.441176	0.656716	-0.21554	0.00131663	0.0177335	More in Cancer
araQ...ugpE	0.441176	0.656716	-0.21554	0.00131663	0.0177335	More in Cancer
yteP...lplB	0.441176	0.656716	-0.21554	0.00131663	0.0177335	More in Cancer
group_12813	0.491176	0.686567	-0.195391	0.00469106	0.0384747	More in Cancer
yycB	0.705882	0.522388	0.183494	0.00428698	0.0358048	More in Healthy
tetR...yvdT	0.705882	0.507463	0.19842	0.00254771	0.0286826	More in Healthy
ypdA...yesM	0.441176	0.656716	-0.21554	0.00131663	0.0177335	More in Cancer
queH	0.491176	0.686567	-0.195391	0.00469106	0.0384747	More in Cancer
group_16638	0.491176	0.686567	-0.195391	0.00469106	0.0384747	More in Cancer
group_13334	0.394118	0.597015	-0.202897	0.00281249	0.0309791	More in Cancer
lacI...malR...purR	0.491176	0.686567	-0.195391	0.00469106	0.0384747	More in Cancer
lacT...bglG	0.4	0.776119	-0.376119	1.59268e-08	2.90013e-05	More in Cancer
group_15632	0.491176	0.686567	-0.195391	0.00469106	0.0384747	More in Cancer
tehA	0.394118	0.597015	-0.202897	0.00281249	0.0309791	More in Cancer
group_13639	0.394118	0.597015	-0.202897	0.00281249	0.0309791	More in Cancer
group_13560	0.394118	0.597015	-0.202897	0.00281249	0.0309791	More in Cancer
group_13249	0.417647	0.761194	-0.343547	2.25468e-07	0.000197531	More in Cancer
group_12835	0.394118	0.597015	-0.202897	0.00281249	0.0309791	More in Cancer
group_12819	0.394118	0.597015	-0.202897	0.00281249	0.0309791	More in Cancer
group_7913	0.394118	0.597015	-0.202897	0.00281249	0.0309791	More in Cancer
group_7621	0.394118	0.597015	-0.202897	0.00281249	0.0309791	More in Cancer
lacE...celB	0.402941	0.776119	-0.373178	1.80562e-08	2.90013e-05	More in Cancer
lacF	0.402941	0.776119	-0.373178	1.80562e-08	2.90013e-05	More in Cancer
yfcE	0.391176	0.597015	-0.205838	0.00273805	0.0306109	More in Cancer
group_9521	0.420588	0.716418	-0.29583	1.32136e-05	0.00306841	More in Cancer
group_9135	0.420588	0.716418	-0.29583	1.32136e-05	0.00306841	More in Cancer
group_8521	0.420588	0.716418	-0.29583	1.32136e-05	0.00306841	More in Cancer
group_14948	0.655882	0.462687	0.193196	0.00365665	0.0358048	More in Healthy
group_13175	0.364706	0.552239	-0.187533	0.00596339	0.0481518	More in Cancer
group_13572	0.373529	0.567164	-0.193635	0.00410104	0.0358048	More in Cancer
group_14946	0.397059	0.671642	-0.274583	4.48234e-05	0.00457333	More in Cancer
moeZ...pspE	0.320588	0.597015	-0.276427	2.72793e-05	0.00441833	More in Cancer
rae1...yacP	0.652941	0.447761	0.20518	0.0022965	0.0263311	More in Healthy
group_14411	0.352941	0.61194	-0.258999	0.000110236	0.00614072	More in Cancer
group_15404	0.626471	0.38806	0.238411	0.000381861	0.0157602	More in Healthy
group_13244	0.364706	0.567164	-0.202458	0.00255813	0.0286826	More in Cancer
group_13820	0.626471	0.358209	0.268262	6.95564e-05	0.00561796	More in Healthy
group_13694	0.626471	0.358209	0.268262	6.95564e-05	0.00561796	More in Healthy
group_13646	0.626471	0.358209	0.268262	6.95564e-05	0.00561796	More in Healthy
tcyN...glnQ	0.629412	0.358209	0.271203	6.63581e-05	0.00561796	More in Healthy
group_13523	0.626471	0.358209	0.268262	6.95564e-05	0.00561796	More in Healthy
group_14085	0.367647	0.626866	-0.259219	0.000119655	0.00653321	More in Cancer
group_13116	0.255882	0.537313	-0.281431	1.61113e-05	0.0031535	More in Cancer
group_12764	0.352941	0.552239	-0.199298	0.0036779	0.0358048	More in Cancer
group_13325	0.65	0.358209	0.291791	1.66005e-05	0.0031535	More in Healthy
group_15636	0.405882	0.597015	-0.191133	0.00461078	0.0379884	More in Cancer
fruA...luxR	0.405882	0.597015	-0.191133	0.00461078	0.0379884	More in Cancer
group_15385	0.405882	0.597015	-0.191133	0.00461078	0.0379884	More in Cancer
group_15315	0.405882	0.597015	-0.191133	0.00461078	0.0379884	More in Cancer
group_14483	0.405882	0.597015	-0.191133	0.00461078	0.0379884	More in Cancer
group_15477	0.347059	0.552239	-0.20518	0.0022965	0.0263311	More in Cancer
group_12422	0.358824	0.597015	-0.238191	0.000358126	0.0149729	More in Cancer
group_12787	0.626471	0.373134	0.253336	0.000210063	0.00961562	More in Healthy
lacI...galR...purR...ebgR	0.314706	0.537313	-0.222608	0.000718142	0.0162614	More in Cancer
group_15743	0.6	0.402985	0.197015	0.00435268	0.0361766	More in Healthy
glgP	0.602941	0.402985	0.199956	0.00294074	0.0319247	More in Healthy
group_14128	0.305882	0.492537	-0.186655	0.00445424	0.0369329	More in Cancer
group_11872	0.173529	0.477612	-0.304083	5.13744e-07	0.000353639	More in Cancer
group_13972	0.582353	0.358209	0.224144	0.00115674	0.0162614	More in Healthy
group_14002	0.564706	0.358209	0.206497	0.00208888	0.0240652	More in Healthy
group_13994	0.182353	0.492537	-0.310184	3.39403e-07	0.000261666	More in Cancer
group_14547	0.294118	0.492537	-0.19842	0.00254771	0.0286826	More in Cancer
group_11582	0.441176	0.223881	0.217296	0.000985942	0.0162614	More in Healthy
parB	0.182353	0.477612	-0.295259	9.30429e-07	0.000543427	More in Cancer
group_14489	0.535294	0.253731	0.281563	2.64889e-05	0.00432667	More in Healthy
group_8236	0.270588	0.447761	-0.177173	0.00536952	0.0434658	More in Cancer
group_14936	0.473529	0.283582	0.189947	0.00458843	0.037956	More in Healthy
ysdA	0.261765	0.447761	-0.185996	0.00317412	0.0336897	More in Cancer
cbpJ...cbpF...cbpC	0.264706	0.447761	-0.183055	0.0049669	0.0404787	More in Cancer
mefA	0.261765	0.552239	-0.290474	9.17962e-06	0.00264072	More in Cancer
yheS...msr...msrD	0.261765	0.552239	-0.290474	9.17962e-06	0.00264072	More in Cancer
group_3937	0.252941	0.552239	-0.299298	3.75749e-06	0.00139273	More in Cancer
group_15497	0.252941	0.552239	-0.299298	3.75749e-06	0.00139273	More in Cancer
group_8955	0.217647	0.447761	-0.230114	0.000187268	0.00920844	More in Cancer
group_3191	0.244118	0.477612	-0.233494	0.000189027	0.00920844	More in Cancer
group_9869	0.414706	0.223881	0.190825	0.00367603	0.0358048	More in Healthy
group_15415	0.426471	0.223881	0.20259	0.0016553	0.0217144	More in Healthy
group_8506	0.138235	0.38806	-0.249824	6.84011e-06	0.00220699	More in Cancer
group_7974	0.223529	0.432836	-0.209306	0.000673998	0.0162614	More in Cancer
group_6114	0.214706	0.447761	-0.233055	0.000170646	0.00861004	More in Cancer
group_6113	0.214706	0.447761	-0.233055	0.000170646	0.00861004	More in Cancer
group_3844	0.214706	0.447761	-0.233055	0.000170646	0.00861004	More in Cancer
queF	0.214706	0.447761	-0.233055	0.000170646	0.00861004	More in Cancer
aF2118	0.235294	0.477612	-0.242318	0.000139439	0.00726362	More in Cancer
tdh	0.132353	0.41791	-0.285558	3.29419e-07	0.000261666	More in Cancer
group_9763	0.408824	0.223881	0.184943	0.00387923	0.0358048	More in Healthy
group_14997	0.488235	0.149254	0.338982	1.46281e-07	0.000135882	More in Healthy
group_13582	0.426471	0.208955	0.217515	0.000906467	0.0162614	More in Healthy
group_13571	0.426471	0.208955	0.217515	0.000906467	0.0162614	More in Healthy
group_14382	0.482353	0.268657	0.213696	0.0012367	0.0168692	More in Healthy
group_14351	0.482353	0.268657	0.213696	0.0012367	0.0168692	More in Healthy
group_13302	0.138235	0.358209	-0.219974	6.45196e-05	0.00561796	More in Cancer
group_9671	0.408824	0.208955	0.199868	0.00221949	0.0255089	More in Healthy
group_7478	0.411765	0.164179	0.247586	8.86101e-05	0.0059768	More in Healthy
glnR...merR...soxR	0.467647	0.268657	0.19899	0.00289028	0.0315622	More in Healthy
glnA	0.467647	0.268657	0.19899	0.00289028	0.0315622	More in Healthy
hisF	0.467647	0.253731	0.213916	0.00116893	0.0162614	More in Healthy
group_15202	0.2	0.402985	-0.202985	0.000754596	0.0162614	More in Cancer
group_14588	0.438235	0.238806	0.199429	0.00258584	0.0289765	More in Healthy
hisE	0.467647	0.253731	0.213916	0.00116893	0.0162614	More in Healthy
hisG	0.461765	0.208955	0.252809	0.000123799	0.00668378	More in Healthy
hisD	0.461765	0.208955	0.252809	0.000123799	0.00668378	More in Healthy
hisB	0.461765	0.208955	0.252809	0.000123799	0.00668378	More in Healthy
hisA	0.461765	0.208955	0.252809	0.000123799	0.00668378	More in Healthy
hisH	0.458824	0.208955	0.249868	0.000127207	0.00684858	More in Healthy
group_491	0.173529	0.462687	-0.289157	1.26975e-06	0.000699232	More in Cancer
group_9245	0.367647	0.179104	0.188543	0.00279019	0.0309791	More in Healthy
tnp...tra5	0.188235	0.477612	-0.289377	2.29664e-06	0.00103423	More in Cancer
group_13609	0.452941	0.208955	0.243986	0.00020905	0.00961562	More in Healthy
hmuV	0.452941	0.208955	0.243986	0.00020905	0.00961562	More in Healthy
hmuU	0.452941	0.208955	0.243986	0.00020905	0.00961562	More in Healthy
group_11199	0.0794118	0.328358	-0.248946	3.85534e-07	0.000275214	More in Cancer
blpY...ydiL	0.167647	0.38806	-0.220413	0.000186331	0.00920844	More in Cancer
group_15797	0.355882	0.164179	0.191703	0.00168028	0.0217144	More in Healthy
group_15788	0.355882	0.164179	0.191703	0.00168028	0.0217144	More in Healthy
group_15205	0.408824	0.164179	0.244644	9.29666e-05	0.0059768	More in Healthy
serC	0.408824	0.164179	0.244644	9.29666e-05	0.0059768	More in Healthy
serA	0.408824	0.164179	0.244644	9.29666e-05	0.0059768	More in Healthy
thiT	0.35	0.164179	0.185821	0.00249803	0.0285739	More in Healthy
group_9444	0.129412	0.283582	-0.15417	0.0027804	0.0309791	More in Cancer
group_14857	0.347059	0.119403	0.227656	0.000139343	0.00726362	More in Healthy
group_4270	0.188235	0.358209	-0.169974	0.00326802	0.0343258	More in Cancer
group_8348	0.0735294	0.328358	-0.254829	1.48051e-07	0.000135882	More in Cancer
clcA...clcB	0.0911765	0.328358	-0.237182	2.15961e-06	0.00103423	More in Cancer
group_6639	0.123529	0.268657	-0.145127	0.00417388	0.0358048	More in Cancer
group_7036	0.123529	0.373134	-0.249605	5.50959e-06	0.00186302	More in Cancer
group_15295	0.405882	0.164179	0.241703	0.000147023	0.00756524	More in Healthy
narK	0.411765	0.134328	0.277436	6.87036e-06	0.00220699	More in Healthy
aliA	0.0647059	0.328358	-0.263652	3.05786e-08	4.4722e-05	More in Cancer
ywaF	0.120588	0.268657	-0.148068	0.00370329	0.0358048	More in Cancer
group_15305	0.417647	0.164179	0.253468	5.44634e-05	0.00497501	More in Healthy
malG	0.408824	0.164179	0.244644	9.29666e-05	0.0059768	More in Healthy
group_15448	0.408824	0.164179	0.244644	9.29666e-05	0.0059768	More in Healthy
group_12924	0.126471	0.268657	-0.142186	0.00479894	0.0392093	More in Cancer
hflC	0.0911765	0.223881	-0.132704	0.00482269	0.0393867	More in Cancer
group_15429	0.405882	0.164179	0.241703	0.000147023	0.00756524	More in Healthy
group_13138	0.288235	0.0597015	0.228534	2.14927e-05	0.00373198	More in Healthy
group_15850	0.352941	0.164179	0.188762	0.00246054	0.0281785	More in Healthy
trpD	0.352941	0.164179	0.188762	0.00246054	0.0281785	More in Healthy
sulP...ychM	0.379412	0.149254	0.230158	0.000208941	0.00961562	More in Healthy
group_13472	0.355882	0.149254	0.206629	0.000878143	0.0162614	More in Healthy
ydhF	0.102941	0.268657	-0.165716	0.00106094	0.0162614	More in Cancer
group_10252	0.123529	0.343284	-0.219754	3.55348e-05	0.00457333	More in Cancer
group_16639	0.332353	0.164179	0.168174	0.00570556	0.046128	More in Healthy
group_13469	0.279412	0.0895522	0.18986	0.000587504	0.0162614	More in Healthy
group_13380	0.335294	0.134328	0.200966	0.000752377	0.0162614	More in Healthy
group_9352	0.0588235	0.313433	-0.254609	4.02894e-08	4.85336e-05	More in Cancer
sbcD	0.329412	0.134328	0.195083	0.0011641	0.0162614	More in Healthy
group_15769	0.3	0.134328	0.165672	0.00434901	0.0361617	More in Healthy
group_14000	0.358824	0.179104	0.179719	0.00422678	0.0358048	More in Healthy
group_13906	0.329412	0.0149254	0.314486	1.31705e-09	5.07698e-06	More in Healthy
group_9846	0.0911765	0.238806	-0.147629	0.00140379	0.0188943	More in Cancer
glpR	0.326471	0.134328	0.192142	0.00118961	0.0162614	More in Healthy
group_15525	0.138235	0.298507	-0.160272	0.00331237	0.0346031	More in Cancer
pezT	0.105882	0.343284	-0.237401	4.4922e-06	0.00154612	More in Cancer
group_15226	0.111765	0.492537	-0.380773	1.67242e-11	3.22343e-07	More in Cancer
group_13907	0.332353	0.0149254	0.317428	1.19611e-09	5.07698e-06	More in Healthy
pacL	0.335294	0.164179	0.171115	0.00561634	0.0454257	More in Healthy
group_14999	0.323529	0.134328	0.189201	0.00181723	0.0217144	More in Healthy
tetR...kstR2	0.302941	0.134328	0.168613	0.00424407	0.0358048	More in Healthy
group_13409	0.326471	0.134328	0.192142	0.00118961	0.0162614	More in Healthy
group_11092	0.0558824	0.268657	-0.212774	1.40856e-06	0.000754128	More in Cancer
group_14901	0.3	0.134328	0.165672	0.00434901	0.0361617	More in Healthy
aF0785	0.108824	0.298507	-0.189684	0.000169052	0.00861004	More in Cancer
group_13118	0.302941	0.0597015	0.24324	7.23481e-06	0.00228596	More in Healthy
group_12743	0.3	0.0597015	0.240299	1.23118e-05	0.0030613	More in Healthy
group_13441	0.326471	0.134328	0.192142	0.00118961	0.0162614	More in Healthy
group_13364	0.297059	0.0597015	0.237357	1.2291e-05	0.0030613	More in Healthy
group_12670	0.297059	0.0597015	0.237357	1.2291e-05	0.0030613	More in Healthy
group_15793	0.326471	0.134328	0.192142	0.00118961	0.0162614	More in Healthy
group_14928	0.326471	0.134328	0.192142	0.00118961	0.0162614	More in Healthy
group_13584	0.323529	0.134328	0.189201	0.00181723	0.0217144	More in Healthy
group_11061	0.0941176	0.253731	-0.159614	0.000746001	0.0162614	More in Cancer
ptsH	0.329412	0.134328	0.195083	0.0011641	0.0162614	More in Healthy
nrdE	0.329412	0.134328	0.195083	0.0011641	0.0162614	More in Healthy
ptsA...ptsI	0.329412	0.134328	0.195083	0.0011641	0.0162614	More in Healthy
gltA	0.329412	0.134328	0.195083	0.0011641	0.0162614	More in Healthy
nrdH	0.329412	0.134328	0.195083	0.0011641	0.0162614	More in Healthy
group_17800	0.326471	0.134328	0.192142	0.00118961	0.0162614	More in Healthy
group_17797	0.326471	0.134328	0.192142	0.00118961	0.0162614	More in Healthy
group_17796	0.326471	0.134328	0.192142	0.00118961	0.0162614	More in Healthy
group_17723	0.326471	0.134328	0.192142	0.00118961	0.0162614	More in Healthy
group_17664	0.326471	0.134328	0.192142	0.00118961	0.0162614	More in Healthy
cotS	0.326471	0.134328	0.192142	0.00118961	0.0162614	More in Healthy
hIS2	0.326471	0.134328	0.192142	0.00118961	0.0162614	More in Healthy
group_15809	0.326471	0.134328	0.192142	0.00118961	0.0162614	More in Healthy
group_15687	0.326471	0.134328	0.192142	0.00118961	0.0162614	More in Healthy
group_14437	0.326471	0.134328	0.192142	0.00118961	0.0162614	More in Healthy
group_14304	0.326471	0.134328	0.192142	0.00118961	0.0162614	More in Healthy
group_14040	0.326471	0.134328	0.192142	0.00118961	0.0162614	More in Healthy
group_13399	0.326471	0.134328	0.192142	0.00118961	0.0162614	More in Healthy
group_13326	0.326471	0.134328	0.192142	0.00118961	0.0162614	More in Healthy
zinT	0.326471	0.134328	0.192142	0.00118961	0.0162614	More in Healthy
group_13246	0.326471	0.134328	0.192142	0.00118961	0.0162614	More in Healthy
group_12246	0.326471	0.134328	0.192142	0.00118961	0.0162614	More in Healthy
group_11616	0.326471	0.134328	0.192142	0.00118961	0.0162614	More in Healthy
group_11531	0.326471	0.134328	0.192142	0.00118961	0.0162614	More in Healthy
group_11287	0.326471	0.134328	0.192142	0.00118961	0.0162614	More in Healthy
group_11250	0.326471	0.134328	0.192142	0.00118961	0.0162614	More in Healthy
group_11076	0.326471	0.134328	0.192142	0.00118961	0.0162614	More in Healthy
group_10616	0.326471	0.134328	0.192142	0.00118961	0.0162614	More in Healthy
group_10603	0.326471	0.134328	0.192142	0.00118961	0.0162614	More in Healthy
group_10466	0.326471	0.134328	0.192142	0.00118961	0.0162614	More in Healthy
elaA	0.326471	0.134328	0.192142	0.00118961	0.0162614	More in Healthy
dnaI	0.326471	0.134328	0.192142	0.00118961	0.0162614	More in Healthy
lrgA...amiA	0.326471	0.134328	0.192142	0.00118961	0.0162614	More in Healthy
group_10072	0.326471	0.134328	0.192142	0.00118961	0.0162614	More in Healthy
group_9934	0.326471	0.134328	0.192142	0.00118961	0.0162614	More in Healthy
ispA	0.326471	0.134328	0.192142	0.00118961	0.0162614	More in Healthy
group_9704	0.326471	0.134328	0.192142	0.00118961	0.0162614	More in Healthy
group_9656	0.326471	0.134328	0.192142	0.00118961	0.0162614	More in Healthy
group_9616	0.326471	0.134328	0.192142	0.00118961	0.0162614	More in Healthy
ampC	0.326471	0.134328	0.192142	0.00118961	0.0162614	More in Healthy
whiA	0.326471	0.134328	0.192142	0.00118961	0.0162614	More in Healthy
mraY	0.326471	0.134328	0.192142	0.00118961	0.0162614	More in Healthy
group_9300	0.326471	0.134328	0.192142	0.00118961	0.0162614	More in Healthy
group_9241	0.326471	0.134328	0.192142	0.00118961	0.0162614	More in Healthy
xseA	0.326471	0.134328	0.192142	0.00118961	0.0162614	More in Healthy
group_9162	0.326471	0.134328	0.192142	0.00118961	0.0162614	More in Healthy
group_9117	0.326471	0.134328	0.192142	0.00118961	0.0162614	More in Healthy
rpmA	0.326471	0.134328	0.192142	0.00118961	0.0162614	More in Healthy
group_9074	0.326471	0.134328	0.192142	0.00118961	0.0162614	More in Healthy
cofD	0.326471	0.134328	0.192142	0.00118961	0.0162614	More in Healthy
group_8969	0.326471	0.134328	0.192142	0.00118961	0.0162614	More in Healthy
yccU	0.326471	0.134328	0.192142	0.00118961	0.0162614	More in Healthy
group_8961	0.326471	0.134328	0.192142	0.00118961	0.0162614	More in Healthy
htrA	0.326471	0.134328	0.192142	0.00118961	0.0162614	More in Healthy
dadA	0.326471	0.134328	0.192142	0.00118961	0.0162614	More in Healthy
lytN...lysM	0.326471	0.134328	0.192142	0.00118961	0.0162614	More in Healthy
pTC1	0.326471	0.134328	0.192142	0.00118961	0.0162614	More in Healthy
group_8617	0.326471	0.134328	0.192142	0.00118961	0.0162614	More in Healthy
yggS	0.326471	0.134328	0.192142	0.00118961	0.0162614	More in Healthy
group_8587	0.326471	0.134328	0.192142	0.00118961	0.0162614	More in Healthy
group_8586	0.326471	0.134328	0.192142	0.00118961	0.0162614	More in Healthy
group_8481	0.326471	0.134328	0.192142	0.00118961	0.0162614	More in Healthy
rapZ	0.326471	0.134328	0.192142	0.00118961	0.0162614	More in Healthy
group_8317	0.326471	0.134328	0.192142	0.00118961	0.0162614	More in Healthy
group_8316	0.326471	0.134328	0.192142	0.00118961	0.0162614	More in Healthy
comFC	0.326471	0.134328	0.192142	0.00118961	0.0162614	More in Healthy
cbrT	0.326471	0.134328	0.192142	0.00118961	0.0162614	More in Healthy
group_8253	0.326471	0.134328	0.192142	0.00118961	0.0162614	More in Healthy
group_8235	0.326471	0.134328	0.192142	0.00118961	0.0162614	More in Healthy
group_8234	0.326471	0.134328	0.192142	0.00118961	0.0162614	More in Healthy
group_8231	0.326471	0.134328	0.192142	0.00118961	0.0162614	More in Healthy
comFA...comF	0.326471	0.134328	0.192142	0.00118961	0.0162614	More in Healthy
rplU	0.326471	0.134328	0.192142	0.00118961	0.0162614	More in Healthy
group_8177	0.326471	0.134328	0.192142	0.00118961	0.0162614	More in Healthy
lCB5	0.326471	0.134328	0.192142	0.00118961	0.0162614	More in Healthy
group_8098	0.326471	0.134328	0.192142	0.00118961	0.0162614	More in Healthy
dnaQ...polC...dinG	0.326471	0.134328	0.192142	0.00118961	0.0162614	More in Healthy
rluA	0.326471	0.134328	0.192142	0.00118961	0.0162614	More in Healthy
yneF	0.326471	0.134328	0.192142	0.00118961	0.0162614	More in Healthy
group_8061	0.326471	0.134328	0.192142	0.00118961	0.0162614	More in Healthy
group_8043	0.326471	0.134328	0.192142	0.00118961	0.0162614	More in Healthy
nhaP	0.326471	0.134328	0.192142	0.00118961	0.0162614	More in Healthy
group_8022	0.326471	0.134328	0.192142	0.00118961	0.0162614	More in Healthy
group_8002	0.326471	0.134328	0.192142	0.00118961	0.0162614	More in Healthy
folK	0.326471	0.134328	0.192142	0.00118961	0.0162614	More in Healthy
group_7942	0.326471	0.134328	0.192142	0.00118961	0.0162614	More in Healthy
iscR	0.326471	0.134328	0.192142	0.00118961	0.0162614	More in Healthy
yabA	0.326471	0.134328	0.192142	0.00118961	0.0162614	More in Healthy
group_7871	0.326471	0.134328	0.192142	0.00118961	0.0162614	More in Healthy
pta	0.326471	0.134328	0.192142	0.00118961	0.0162614	More in Healthy
lplA	0.326471	0.134328	0.192142	0.00118961	0.0162614	More in Healthy
group_7807	0.326471	0.134328	0.192142	0.00118961	0.0162614	More in Healthy
ftsQ	0.326471	0.134328	0.192142	0.00118961	0.0162614	More in Healthy
nth	0.326471	0.134328	0.192142	0.00118961	0.0162614	More in Healthy
group_7717	0.326471	0.134328	0.192142	0.00118961	0.0162614	More in Healthy
group_7704	0.326471	0.134328	0.192142	0.00118961	0.0162614	More in Healthy
group_7690	0.326471	0.134328	0.192142	0.00118961	0.0162614	More in Healthy
acpP	0.326471	0.134328	0.192142	0.00118961	0.0162614	More in Healthy
group_7631	0.326471	0.134328	0.192142	0.00118961	0.0162614	More in Healthy
group_7608	0.326471	0.134328	0.192142	0.00118961	0.0162614	More in Healthy
malQ	0.326471	0.134328	0.192142	0.00118961	0.0162614	More in Healthy
group_7523	0.326471	0.134328	0.192142	0.00118961	0.0162614	More in Healthy
pilF	0.326471	0.134328	0.192142	0.00118961	0.0162614	More in Healthy
group_7483	0.326471	0.134328	0.192142	0.00118961	0.0162614	More in Healthy
yhgE	0.326471	0.134328	0.192142	0.00118961	0.0162614	More in Healthy
group_7352	0.326471	0.134328	0.192142	0.00118961	0.0162614	More in Healthy
group_7324	0.326471	0.134328	0.192142	0.00118961	0.0162614	More in Healthy
group_7265	0.326471	0.134328	0.192142	0.00118961	0.0162614	More in Healthy
group_7253	0.326471	0.134328	0.192142	0.00118961	0.0162614	More in Healthy
bglG...licT	0.326471	0.134328	0.192142	0.00118961	0.0162614	More in Healthy
deoR	0.326471	0.134328	0.192142	0.00118961	0.0162614	More in Healthy
group_7190	0.326471	0.134328	0.192142	0.00118961	0.0162614	More in Healthy
dps	0.326471	0.134328	0.192142	0.00118961	0.0162614	More in Healthy
azlC	0.326471	0.134328	0.192142	0.00118961	0.0162614	More in Healthy
group_7130	0.326471	0.134328	0.192142	0.00118961	0.0162614	More in Healthy
group_7119	0.326471	0.134328	0.192142	0.00118961	0.0162614	More in Healthy
yIH1	0.326471	0.134328	0.192142	0.00118961	0.0162614	More in Healthy
group_7102	0.326471	0.134328	0.192142	0.00118961	0.0162614	More in Healthy
group_7086	0.326471	0.134328	0.192142	0.00118961	0.0162614	More in Healthy
modF	0.326471	0.134328	0.192142	0.00118961	0.0162614	More in Healthy
group_7018	0.326471	0.134328	0.192142	0.00118961	0.0162614	More in Healthy
group_7016	0.326471	0.134328	0.192142	0.00118961	0.0162614	More in Healthy
nnrD	0.326471	0.134328	0.192142	0.00118961	0.0162614	More in Healthy
aRO8...gntR	0.326471	0.134328	0.192142	0.00118961	0.0162614	More in Healthy
group_6934	0.326471	0.134328	0.192142	0.00118961	0.0162614	More in Healthy
rplS	0.326471	0.134328	0.192142	0.00118961	0.0162614	More in Healthy
comEC	0.326471	0.134328	0.192142	0.00118961	0.0162614	More in Healthy
nadK	0.326471	0.134328	0.192142	0.00118961	0.0162614	More in Healthy
group_6876	0.326471	0.134328	0.192142	0.00118961	0.0162614	More in Healthy
group_6866	0.326471	0.134328	0.192142	0.00118961	0.0162614	More in Healthy
group_6864	0.326471	0.134328	0.192142	0.00118961	0.0162614	More in Healthy
trxA	0.326471	0.134328	0.192142	0.00118961	0.0162614	More in Healthy
group_6833	0.326471	0.134328	0.192142	0.00118961	0.0162614	More in Healthy
group_6824	0.326471	0.134328	0.192142	0.00118961	0.0162614	More in Healthy
group_6823	0.326471	0.134328	0.192142	0.00118961	0.0162614	More in Healthy
group_6816	0.326471	0.134328	0.192142	0.00118961	0.0162614	More in Healthy
group_6786	0.326471	0.134328	0.192142	0.00118961	0.0162614	More in Healthy
folB	0.326471	0.134328	0.192142	0.00118961	0.0162614	More in Healthy
group_6767	0.326471	0.134328	0.192142	0.00118961	0.0162614	More in Healthy
group_6765	0.326471	0.134328	0.192142	0.00118961	0.0162614	More in Healthy
group_6754	0.326471	0.134328	0.192142	0.00118961	0.0162614	More in Healthy
group_6747	0.326471	0.134328	0.192142	0.00118961	0.0162614	More in Healthy
pmrA	0.326471	0.134328	0.192142	0.00118961	0.0162614	More in Healthy
group_6742	0.326471	0.134328	0.192142	0.00118961	0.0162614	More in Healthy
group_6702	0.326471	0.134328	0.192142	0.00118961	0.0162614	More in Healthy
group_6670	0.326471	0.134328	0.192142	0.00118961	0.0162614	More in Healthy
nIF3	0.326471	0.134328	0.192142	0.00118961	0.0162614	More in Healthy
srmB	0.326471	0.134328	0.192142	0.00118961	0.0162614	More in Healthy
group_6597	0.326471	0.134328	0.192142	0.00118961	0.0162614	More in Healthy
ribU	0.326471	0.134328	0.192142	0.00118961	0.0162614	More in Healthy
group_6578	0.326471	0.134328	0.192142	0.00118961	0.0162614	More in Healthy
group_6570	0.326471	0.134328	0.192142	0.00118961	0.0162614	More in Healthy
fldA	0.326471	0.134328	0.192142	0.00118961	0.0162614	More in Healthy
group_6548	0.326471	0.134328	0.192142	0.00118961	0.0162614	More in Healthy
group_6494	0.326471	0.134328	0.192142	0.00118961	0.0162614	More in Healthy
fur	0.326471	0.134328	0.192142	0.00118961	0.0162614	More in Healthy
group_6442	0.326471	0.134328	0.192142	0.00118961	0.0162614	More in Healthy
tag	0.326471	0.134328	0.192142	0.00118961	0.0162614	More in Healthy
group_6405	0.326471	0.134328	0.192142	0.00118961	0.0162614	More in Healthy
group_6379	0.326471	0.134328	0.192142	0.00118961	0.0162614	More in Healthy
group_6371	0.326471	0.134328	0.192142	0.00118961	0.0162614	More in Healthy
yqjQ	0.326471	0.134328	0.192142	0.00118961	0.0162614	More in Healthy
group_6357	0.326471	0.134328	0.192142	0.00118961	0.0162614	More in Healthy
group_6355	0.326471	0.134328	0.192142	0.00118961	0.0162614	More in Healthy
ypuA	0.326471	0.134328	0.192142	0.00118961	0.0162614	More in Healthy
azlD2	0.326471	0.134328	0.192142	0.00118961	0.0162614	More in Healthy
menH	0.326471	0.134328	0.192142	0.00118961	0.0162614	More in Healthy
group_6329	0.326471	0.134328	0.192142	0.00118961	0.0162614	More in Healthy
ymcA	0.326471	0.134328	0.192142	0.00118961	0.0162614	More in Healthy
group_6322	0.326471	0.134328	0.192142	0.00118961	0.0162614	More in Healthy
phzF	0.326471	0.134328	0.192142	0.00118961	0.0162614	More in Healthy
malY	0.326471	0.134328	0.192142	0.00118961	0.0162614	More in Healthy
group_6310	0.326471	0.134328	0.192142	0.00118961	0.0162614	More in Healthy
mhqR	0.326471	0.134328	0.192142	0.00118961	0.0162614	More in Healthy
group_6196	0.326471	0.134328	0.192142	0.00118961	0.0162614	More in Healthy
group_6195	0.326471	0.134328	0.192142	0.00118961	0.0162614	More in Healthy
group_6152	0.326471	0.134328	0.192142	0.00118961	0.0162614	More in Healthy
group_6150	0.326471	0.134328	0.192142	0.00118961	0.0162614	More in Healthy
dppD	0.326471	0.134328	0.192142	0.00118961	0.0162614	More in Healthy
ftsB	0.326471	0.134328	0.192142	0.00118961	0.0162614	More in Healthy
group_6115	0.326471	0.134328	0.192142	0.00118961	0.0162614	More in Healthy
ebsA	0.326471	0.134328	0.192142	0.00118961	0.0162614	More in Healthy
ykvI	0.326471	0.134328	0.192142	0.00118961	0.0162614	More in Healthy
group_6075	0.326471	0.134328	0.192142	0.00118961	0.0162614	More in Healthy
group_6064	0.326471	0.134328	0.192142	0.00118961	0.0162614	More in Healthy
group_6046	0.326471	0.134328	0.192142	0.00118961	0.0162614	More in Healthy
group_6022	0.326471	0.134328	0.192142	0.00118961	0.0162614	More in Healthy
group_6013	0.326471	0.134328	0.192142	0.00118961	0.0162614	More in Healthy
group_6002	0.326471	0.134328	0.192142	0.00118961	0.0162614	More in Healthy
group_5999	0.326471	0.134328	0.192142	0.00118961	0.0162614	More in Healthy
group_5943	0.326471	0.134328	0.192142	0.00118961	0.0162614	More in Healthy
group_5897	0.297059	0.0597015	0.237357	1.2291e-05	0.0030613	More in Healthy
group_5894	0.326471	0.134328	0.192142	0.00118961	0.0162614	More in Healthy
tesA	0.326471	0.134328	0.192142	0.00118961	0.0162614	More in Healthy
group_5853	0.326471	0.134328	0.192142	0.00118961	0.0162614	More in Healthy
group_5832	0.326471	0.134328	0.192142	0.00118961	0.0162614	More in Healthy
group_5758	0.326471	0.134328	0.192142	0.00118961	0.0162614	More in Healthy
group_5755	0.326471	0.134328	0.192142	0.00118961	0.0162614	More in Healthy
dapB	0.326471	0.134328	0.192142	0.00118961	0.0162614	More in Healthy
group_5704	0.326471	0.134328	0.192142	0.00118961	0.0162614	More in Healthy
group_5681	0.326471	0.134328	0.192142	0.00118961	0.0162614	More in Healthy
group_5628	0.326471	0.134328	0.192142	0.00118961	0.0162614	More in Healthy
group_5623	0.326471	0.134328	0.192142	0.00118961	0.0162614	More in Healthy
group_5614	0.326471	0.134328	0.192142	0.00118961	0.0162614	More in Healthy
ybeY	0.326471	0.134328	0.192142	0.00118961	0.0162614	More in Healthy
group_5597	0.326471	0.134328	0.192142	0.00118961	0.0162614	More in Healthy
merR...soxR	0.326471	0.134328	0.192142	0.00118961	0.0162614	More in Healthy
group_5582	0.326471	0.134328	0.192142	0.00118961	0.0162614	More in Healthy
group_5566	0.326471	0.134328	0.192142	0.00118961	0.0162614	More in Healthy
group_5558	0.326471	0.134328	0.192142	0.00118961	0.0162614	More in Healthy
amyA	0.326471	0.134328	0.192142	0.00118961	0.0162614	More in Healthy
group_5551	0.326471	0.134328	0.192142	0.00118961	0.0162614	More in Healthy
ppc	0.326471	0.134328	0.192142	0.00118961	0.0162614	More in Healthy
pulO	0.326471	0.134328	0.192142	0.00118961	0.0162614	More in Healthy
group_5512	0.326471	0.134328	0.192142	0.00118961	0.0162614	More in Healthy
group_5496	0.326471	0.134328	0.192142	0.00118961	0.0162614	More in Healthy
group_5427	0.326471	0.134328	0.192142	0.00118961	0.0162614	More in Healthy
group_5417	0.326471	0.134328	0.192142	0.00118961	0.0162614	More in Healthy
group_5398	0.326471	0.134328	0.192142	0.00118961	0.0162614	More in Healthy
cysK	0.326471	0.134328	0.192142	0.00118961	0.0162614	More in Healthy
nadR	0.326471	0.134328	0.192142	0.00118961	0.0162614	More in Healthy
gdhA	0.326471	0.134328	0.192142	0.00118961	0.0162614	More in Healthy
mecA	0.326471	0.134328	0.192142	0.00118961	0.0162614	More in Healthy
group_5313	0.326471	0.134328	0.192142	0.00118961	0.0162614	More in Healthy
group_5284	0.326471	0.134328	0.192142	0.00118961	0.0162614	More in Healthy
yidC	0.326471	0.134328	0.192142	0.00118961	0.0162614	More in Healthy
group_5263	0.326471	0.134328	0.192142	0.00118961	0.0162614	More in Healthy
ecfA1	0.326471	0.134328	0.192142	0.00118961	0.0162614	More in Healthy
group_5219	0.326471	0.134328	0.192142	0.00118961	0.0162614	More in Healthy
cvfB	0.326471	0.134328	0.192142	0.00118961	0.0162614	More in Healthy
group_5216	0.326471	0.134328	0.192142	0.00118961	0.0162614	More in Healthy
group_5211	0.326471	0.134328	0.192142	0.00118961	0.0162614	More in Healthy
hMG1	0.326471	0.134328	0.192142	0.00118961	0.0162614	More in Healthy
group_5205	0.326471	0.134328	0.192142	0.00118961	0.0162614	More in Healthy
group_5204	0.326471	0.134328	0.192142	0.00118961	0.0162614	More in Healthy
group_5186	0.326471	0.134328	0.192142	0.00118961	0.0162614	More in Healthy
era	0.326471	0.134328	0.192142	0.00118961	0.0162614	More in Healthy
coaE	0.326471	0.134328	0.192142	0.00118961	0.0162614	More in Healthy
htpX	0.326471	0.134328	0.192142	0.00118961	0.0162614	More in Healthy
hisI	0.326471	0.134328	0.192142	0.00118961	0.0162614	More in Healthy
ribF	0.326471	0.134328	0.192142	0.00118961	0.0162614	More in Healthy
group_5134	0.326471	0.134328	0.192142	0.00118961	0.0162614	More in Healthy
yktA	0.326471	0.134328	0.192142	0.00118961	0.0162614	More in Healthy
group_5108	0.326471	0.134328	0.192142	0.00118961	0.0162614	More in Healthy
rnz	0.326471	0.134328	0.192142	0.00118961	0.0162614	More in Healthy
hflX	0.326471	0.134328	0.192142	0.00118961	0.0162614	More in Healthy
coaA	0.326471	0.134328	0.192142	0.00118961	0.0162614	More in Healthy
cpdB	0.326471	0.134328	0.192142	0.00118961	0.0162614	More in Healthy
fabH	0.326471	0.134328	0.192142	0.00118961	0.0162614	More in Healthy
comE	0.326471	0.134328	0.192142	0.00118961	0.0162614	More in Healthy
cDA1	0.326471	0.134328	0.192142	0.00118961	0.0162614	More in Healthy
prs	0.326471	0.134328	0.192142	0.00118961	0.0162614	More in Healthy
yjbM	0.326471	0.134328	0.192142	0.00118961	0.0162614	More in Healthy
group_5011	0.326471	0.134328	0.192142	0.00118961	0.0162614	More in Healthy
group_4990	0.326471	0.134328	0.192142	0.00118961	0.0162614	More in Healthy
amt	0.326471	0.134328	0.192142	0.00118961	0.0162614	More in Healthy
trpX	0.326471	0.134328	0.192142	0.00118961	0.0162614	More in Healthy
ydiL	0.326471	0.134328	0.192142	0.00118961	0.0162614	More in Healthy
pepP	0.326471	0.134328	0.192142	0.00118961	0.0162614	More in Healthy
mmcQ	0.326471	0.134328	0.192142	0.00118961	0.0162614	More in Healthy
group_4937	0.326471	0.134328	0.192142	0.00118961	0.0162614	More in Healthy
group_4935	0.326471	0.134328	0.192142	0.00118961	0.0162614	More in Healthy
rhaT	0.326471	0.134328	0.192142	0.00118961	0.0162614	More in Healthy
yoqJ	0.326471	0.134328	0.192142	0.00118961	0.0162614	More in Healthy
ushA	0.326471	0.134328	0.192142	0.00118961	0.0162614	More in Healthy
group_4872	0.326471	0.134328	0.192142	0.00118961	0.0162614	More in Healthy
flgN...ylbF	0.326471	0.134328	0.192142	0.00118961	0.0162614	More in Healthy
livK	0.326471	0.134328	0.192142	0.00118961	0.0162614	More in Healthy
group_4856	0.326471	0.134328	0.192142	0.00118961	0.0162614	More in Healthy
rlmN	0.326471	0.134328	0.192142	0.00118961	0.0162614	More in Healthy
group_4848	0.326471	0.134328	0.192142	0.00118961	0.0162614	More in Healthy
group_4840	0.326471	0.134328	0.192142	0.00118961	0.0162614	More in Healthy
gftA...gtfA	0.326471	0.134328	0.192142	0.00118961	0.0162614	More in Healthy
group_4826	0.326471	0.134328	0.192142	0.00118961	0.0162614	More in Healthy
group_4804	0.326471	0.134328	0.192142	0.00118961	0.0162614	More in Healthy
manZ	0.326471	0.134328	0.192142	0.00118961	0.0162614	More in Healthy
group_4770	0.326471	0.134328	0.192142	0.00118961	0.0162614	More in Healthy
comX	0.326471	0.134328	0.192142	0.00118961	0.0162614	More in Healthy
rarD...eamA	0.326471	0.134328	0.192142	0.00118961	0.0162614	More in Healthy
group_4749	0.326471	0.134328	0.192142	0.00118961	0.0162614	More in Healthy
group_4748	0.326471	0.134328	0.192142	0.00118961	0.0162614	More in Healthy
group_4747	0.326471	0.134328	0.192142	0.00118961	0.0162614	More in Healthy
group_4712	0.326471	0.134328	0.192142	0.00118961	0.0162614	More in Healthy
ldcB	0.326471	0.134328	0.192142	0.00118961	0.0162614	More in Healthy
ypmB	0.326471	0.134328	0.192142	0.00118961	0.0162614	More in Healthy
trmK	0.326471	0.134328	0.192142	0.00118961	0.0162614	More in Healthy
nt5e...ushA	0.326471	0.134328	0.192142	0.00118961	0.0162614	More in Healthy
group_4627	0.326471	0.134328	0.192142	0.00118961	0.0162614	More in Healthy
yaaA	0.326471	0.134328	0.192142	0.00118961	0.0162614	More in Healthy
group_4557	0.326471	0.134328	0.192142	0.00118961	0.0162614	More in Healthy
group_4555	0.326471	0.134328	0.192142	0.00118961	0.0162614	More in Healthy
group_4534	0.326471	0.134328	0.192142	0.00118961	0.0162614	More in Healthy
group_4529	0.326471	0.134328	0.192142	0.00118961	0.0162614	More in Healthy
group_4521	0.326471	0.134328	0.192142	0.00118961	0.0162614	More in Healthy
group_4504	0.326471	0.134328	0.192142	0.00118961	0.0162614	More in Healthy
yqgA	0.326471	0.134328	0.192142	0.00118961	0.0162614	More in Healthy
group_4496	0.326471	0.134328	0.192142	0.00118961	0.0162614	More in Healthy
group_4453	0.326471	0.134328	0.192142	0.00118961	0.0162614	More in Healthy
coaC	0.326471	0.134328	0.192142	0.00118961	0.0162614	More in Healthy
group_4395	0.326471	0.134328	0.192142	0.00118961	0.0162614	More in Healthy
group_4394	0.326471	0.134328	0.192142	0.00118961	0.0162614	More in Healthy
group_4393	0.326471	0.134328	0.192142	0.00118961	0.0162614	More in Healthy
nagB	0.326471	0.134328	0.192142	0.00118961	0.0162614	More in Healthy
group_4366	0.326471	0.134328	0.192142	0.00118961	0.0162614	More in Healthy
group_4353	0.326471	0.134328	0.192142	0.00118961	0.0162614	More in Healthy
liaF	0.326471	0.134328	0.192142	0.00118961	0.0162614	More in Healthy
group_4312	0.326471	0.134328	0.192142	0.00118961	0.0162614	More in Healthy
group_4239	0.326471	0.134328	0.192142	0.00118961	0.0162614	More in Healthy
mdoB	0.326471	0.134328	0.192142	0.00118961	0.0162614	More in Healthy
nusB	0.326471	0.134328	0.192142	0.00118961	0.0162614	More in Healthy
metA	0.326471	0.134328	0.192142	0.00118961	0.0162614	More in Healthy
recJ	0.326471	0.134328	0.192142	0.00118961	0.0162614	More in Healthy
thiI	0.326471	0.134328	0.192142	0.00118961	0.0162614	More in Healthy
cof	0.326471	0.134328	0.192142	0.00118961	0.0162614	More in Healthy
group_4193	0.326471	0.134328	0.192142	0.00118961	0.0162614	More in Healthy
group_4179	0.326471	0.134328	0.192142	0.00118961	0.0162614	More in Healthy
rnhC	0.326471	0.134328	0.192142	0.00118961	0.0162614	More in Healthy
group_4169	0.326471	0.134328	0.192142	0.00118961	0.0162614	More in Healthy
mprF	0.326471	0.134328	0.192142	0.00118961	0.0162614	More in Healthy
group_4156	0.326471	0.134328	0.192142	0.00118961	0.0162614	More in Healthy
group_4153	0.326471	0.134328	0.192142	0.00118961	0.0162614	More in Healthy
group_4139	0.326471	0.134328	0.192142	0.00118961	0.0162614	More in Healthy
ylmH	0.326471	0.134328	0.192142	0.00118961	0.0162614	More in Healthy
group_4120	0.326471	0.134328	0.192142	0.00118961	0.0162614	More in Healthy
group_4096	0.326471	0.134328	0.192142	0.00118961	0.0162614	More in Healthy
comGA	0.326471	0.134328	0.192142	0.00118961	0.0162614	More in Healthy
group_3947	0.326471	0.134328	0.192142	0.00118961	0.0162614	More in Healthy
comGD	0.326471	0.134328	0.192142	0.00118961	0.0162614	More in Healthy
group_3820	0.326471	0.134328	0.192142	0.00118961	0.0162614	More in Healthy
suhB	0.326471	0.134328	0.192142	0.00118961	0.0162614	More in Healthy
jag	0.326471	0.134328	0.192142	0.00118961	0.0162614	More in Healthy
apbE	0.326471	0.134328	0.192142	0.00118961	0.0162614	More in Healthy
queG	0.326471	0.134328	0.192142	0.00118961	0.0162614	More in Healthy
ftsX	0.326471	0.134328	0.192142	0.00118961	0.0162614	More in Healthy
group_3642	0.326471	0.134328	0.192142	0.00118961	0.0162614	More in Healthy
uspA	0.326471	0.134328	0.192142	0.00118961	0.0162614	More in Healthy
folA	0.326471	0.134328	0.192142	0.00118961	0.0162614	More in Healthy
tsaB	0.326471	0.134328	0.192142	0.00118961	0.0162614	More in Healthy
group_3497	0.326471	0.134328	0.192142	0.00118961	0.0162614	More in Healthy
dltD	0.326471	0.134328	0.192142	0.00118961	0.0162614	More in Healthy
mmuM	0.326471	0.134328	0.192142	0.00118961	0.0162614	More in Healthy
group_3472	0.326471	0.134328	0.192142	0.00118961	0.0162614	More in Healthy
cynX	0.326471	0.134328	0.192142	0.00118961	0.0162614	More in Healthy
ylqC	0.326471	0.134328	0.192142	0.00118961	0.0162614	More in Healthy
ypmS	0.326471	0.134328	0.192142	0.00118961	0.0162614	More in Healthy
rimL	0.326471	0.134328	0.192142	0.00118961	0.0162614	More in Healthy
group_3424	0.326471	0.134328	0.192142	0.00118961	0.0162614	More in Healthy
group_3416	0.326471	0.134328	0.192142	0.00118961	0.0162614	More in Healthy
yaaT	0.326471	0.134328	0.192142	0.00118961	0.0162614	More in Healthy
rsmI	0.326471	0.134328	0.192142	0.00118961	0.0162614	More in Healthy
clcA	0.326471	0.134328	0.192142	0.00118961	0.0162614	More in Healthy
smpB	0.326471	0.134328	0.192142	0.00118961	0.0162614	More in Healthy
thrA	0.326471	0.134328	0.192142	0.00118961	0.0162614	More in Healthy
lrgA...yohJ	0.326471	0.134328	0.192142	0.00118961	0.0162614	More in Healthy
group_3316	0.326471	0.134328	0.192142	0.00118961	0.0162614	More in Healthy
group_3290	0.326471	0.134328	0.192142	0.00118961	0.0162614	More in Healthy
degV	0.326471	0.134328	0.192142	0.00118961	0.0162614	More in Healthy
group_3245	0.326471	0.134328	0.192142	0.00118961	0.0162614	More in Healthy
phoH	0.326471	0.134328	0.192142	0.00118961	0.0162614	More in Healthy
comGG	0.326471	0.134328	0.192142	0.00118961	0.0162614	More in Healthy
der	0.326471	0.134328	0.192142	0.00118961	0.0162614	More in Healthy
ppiB	0.326471	0.134328	0.192142	0.00118961	0.0162614	More in Healthy
mltG	0.326471	0.134328	0.192142	0.00118961	0.0162614	More in Healthy
queE	0.326471	0.134328	0.192142	0.00118961	0.0162614	More in Healthy
dgkA	0.326471	0.134328	0.192142	0.00118961	0.0162614	More in Healthy
macB	0.326471	0.134328	0.192142	0.00118961	0.0162614	More in Healthy
group_3032	0.326471	0.134328	0.192142	0.00118961	0.0162614	More in Healthy
recX	0.326471	0.134328	0.192142	0.00118961	0.0162614	More in Healthy
group_3014	0.326471	0.134328	0.192142	0.00118961	0.0162614	More in Healthy
pgpB	0.326471	0.134328	0.192142	0.00118961	0.0162614	More in Healthy
caiA	0.326471	0.134328	0.192142	0.00118961	0.0162614	More in Healthy
pyrH	0.326471	0.134328	0.192142	0.00118961	0.0162614	More in Healthy
potE	0.326471	0.134328	0.192142	0.00118961	0.0162614	More in Healthy
folP	0.326471	0.134328	0.192142	0.00118961	0.0162614	More in Healthy
holA	0.326471	0.134328	0.192142	0.00118961	0.0162614	More in Healthy
penP	0.326471	0.134328	0.192142	0.00118961	0.0162614	More in Healthy
group_2883	0.326471	0.134328	0.192142	0.00118961	0.0162614	More in Healthy
sseB	0.326471	0.134328	0.192142	0.00118961	0.0162614	More in Healthy
comP	0.326471	0.134328	0.192142	0.00118961	0.0162614	More in Healthy
queD	0.326471	0.134328	0.192142	0.00118961	0.0162614	More in Healthy
ridA	0.326471	0.134328	0.192142	0.00118961	0.0162614	More in Healthy
asnS	0.326471	0.134328	0.192142	0.00118961	0.0162614	More in Healthy
group_2802	0.326471	0.134328	0.192142	0.00118961	0.0162614	More in Healthy
group_2798	0.326471	0.134328	0.192142	0.00118961	0.0162614	More in Healthy
group_2756	0.326471	0.134328	0.192142	0.00118961	0.0162614	More in Healthy
group_2729	0.326471	0.134328	0.192142	0.00118961	0.0162614	More in Healthy
group_2728	0.326471	0.134328	0.192142	0.00118961	0.0162614	More in Healthy
group_2726	0.326471	0.134328	0.192142	0.00118961	0.0162614	More in Healthy
atpE	0.326471	0.134328	0.192142	0.00118961	0.0162614	More in Healthy
group_2708	0.326471	0.134328	0.192142	0.00118961	0.0162614	More in Healthy
yajC	0.326471	0.134328	0.192142	0.00118961	0.0162614	More in Healthy
trxB	0.326471	0.134328	0.192142	0.00118961	0.0162614	More in Healthy
group_2668	0.326471	0.134328	0.192142	0.00118961	0.0162614	More in Healthy
group_2631	0.326471	0.134328	0.192142	0.00118961	0.0162614	More in Healthy
rfe	0.326471	0.134328	0.192142	0.00118961	0.0162614	More in Healthy
cbpB	0.326471	0.134328	0.192142	0.00118961	0.0162614	More in Healthy
ecsB	0.326471	0.134328	0.192142	0.00118961	0.0162614	More in Healthy
ycjU	0.326471	0.134328	0.192142	0.00118961	0.0162614	More in Healthy
yhcF	0.326471	0.134328	0.192142	0.00118961	0.0162614	More in Healthy
group_2557	0.326471	0.134328	0.192142	0.00118961	0.0162614	More in Healthy
group_2556	0.326471	0.134328	0.192142	0.00118961	0.0162614	More in Healthy
groES	0.326471	0.134328	0.192142	0.00118961	0.0162614	More in Healthy
rnpA	0.326471	0.134328	0.192142	0.00118961	0.0162614	More in Healthy
aroK	0.326471	0.134328	0.192142	0.00118961	0.0162614	More in Healthy
cps2a	0.326471	0.134328	0.192142	0.00118961	0.0162614	More in Healthy
pgsA	0.326471	0.134328	0.192142	0.00118961	0.0162614	More in Healthy
yozE	0.326471	0.134328	0.192142	0.00118961	0.0162614	More in Healthy
spxR	0.326471	0.134328	0.192142	0.00118961	0.0162614	More in Healthy
brkB	0.326471	0.134328	0.192142	0.00118961	0.0162614	More in Healthy
tmk	0.326471	0.134328	0.192142	0.00118961	0.0162614	More in Healthy
mutM	0.326471	0.134328	0.192142	0.00118961	0.0162614	More in Healthy
gloA	0.326471	0.134328	0.192142	0.00118961	0.0162614	More in Healthy
group_2341	0.326471	0.134328	0.192142	0.00118961	0.0162614	More in Healthy
group_2332	0.326471	0.134328	0.192142	0.00118961	0.0162614	More in Healthy
lspA	0.326471	0.134328	0.192142	0.00118961	0.0162614	More in Healthy
group_2299	0.326471	0.134328	0.192142	0.00118961	0.0162614	More in Healthy
group_2281	0.326471	0.134328	0.192142	0.00118961	0.0162614	More in Healthy
group_2264	0.326471	0.134328	0.192142	0.00118961	0.0162614	More in Healthy
comGB	0.326471	0.134328	0.192142	0.00118961	0.0162614	More in Healthy
ftsL	0.326471	0.134328	0.192142	0.00118961	0.0162614	More in Healthy
group_2229	0.326471	0.134328	0.192142	0.00118961	0.0162614	More in Healthy
yjbK	0.326471	0.134328	0.192142	0.00118961	0.0162614	More in Healthy
manO	0.326471	0.134328	0.192142	0.00118961	0.0162614	More in Healthy
manY	0.326471	0.134328	0.192142	0.00118961	0.0162614	More in Healthy
group_2125	0.326471	0.134328	0.192142	0.00118961	0.0162614	More in Healthy
group_2090	0.326471	0.134328	0.192142	0.00118961	0.0162614	More in Healthy
group_2068	0.326471	0.134328	0.192142	0.00118961	0.0162614	More in Healthy
rimI	0.326471	0.134328	0.192142	0.00118961	0.0162614	More in Healthy
proC	0.326471	0.134328	0.192142	0.00118961	0.0162614	More in Healthy
prmC	0.326471	0.134328	0.192142	0.00118961	0.0162614	More in Healthy
yabR	0.326471	0.134328	0.192142	0.00118961	0.0162614	More in Healthy
ccpA	0.326471	0.134328	0.192142	0.00118961	0.0162614	More in Healthy
group_1987	0.326471	0.134328	0.192142	0.00118961	0.0162614	More in Healthy
dnaG	0.326471	0.134328	0.192142	0.00118961	0.0162614	More in Healthy
fAU1	0.326471	0.134328	0.192142	0.00118961	0.0162614	More in Healthy
group_1903	0.326471	0.134328	0.192142	0.00118961	0.0162614	More in Healthy
gpsB	0.326471	0.134328	0.192142	0.00118961	0.0162614	More in Healthy
group_1897	0.326471	0.134328	0.192142	0.00118961	0.0162614	More in Healthy
vanZ	0.326471	0.134328	0.192142	0.00118961	0.0162614	More in Healthy
ylbG	0.326471	0.134328	0.192142	0.00118961	0.0162614	More in Healthy
livH	0.326471	0.134328	0.192142	0.00118961	0.0162614	More in Healthy
ytxK	0.326471	0.134328	0.192142	0.00118961	0.0162614	More in Healthy
xRE	0.326471	0.134328	0.192142	0.00118961	0.0162614	More in Healthy
ygaE	0.326471	0.134328	0.192142	0.00118961	0.0162614	More in Healthy
group_1845	0.326471	0.134328	0.192142	0.00118961	0.0162614	More in Healthy
group_1844	0.326471	0.134328	0.192142	0.00118961	0.0162614	More in Healthy
nifS	0.326471	0.134328	0.192142	0.00118961	0.0162614	More in Healthy
nagA	0.326471	0.134328	0.192142	0.00118961	0.0162614	More in Healthy
group_1765	0.326471	0.134328	0.192142	0.00118961	0.0162614	More in Healthy
group_1764	0.326471	0.134328	0.192142	0.00118961	0.0162614	More in Healthy
group_1716	0.326471	0.134328	0.192142	0.00118961	0.0162614	More in Healthy
group_1715	0.326471	0.134328	0.192142	0.00118961	0.0162614	More in Healthy
mscS	0.326471	0.134328	0.192142	0.00118961	0.0162614	More in Healthy
thrB	0.326471	0.134328	0.192142	0.00118961	0.0162614	More in Healthy
wzb...yfkJ	0.326471	0.134328	0.192142	0.00118961	0.0162614	More in Healthy
adk	0.326471	0.134328	0.192142	0.00118961	0.0162614	More in Healthy
group_1620	0.326471	0.134328	0.192142	0.00118961	0.0162614	More in Healthy
cdaA	0.326471	0.134328	0.192142	0.00118961	0.0162614	More in Healthy
group_1586	0.326471	0.134328	0.192142	0.00118961	0.0162614	More in Healthy
aspB	0.326471	0.134328	0.192142	0.00118961	0.0162614	More in Healthy
ybbR	0.326471	0.134328	0.192142	0.00118961	0.0162614	More in Healthy
gtrA	0.326471	0.134328	0.192142	0.00118961	0.0162614	More in Healthy
soxS	0.326471	0.134328	0.192142	0.00118961	0.0162614	More in Healthy
frr	0.326471	0.134328	0.192142	0.00118961	0.0162614	More in Healthy
group_1532	0.326471	0.134328	0.192142	0.00118961	0.0162614	More in Healthy
hisJ	0.326471	0.134328	0.192142	0.00118961	0.0162614	More in Healthy
group_1470	0.326471	0.134328	0.192142	0.00118961	0.0162614	More in Healthy
recF	0.326471	0.134328	0.192142	0.00118961	0.0162614	More in Healthy
amiD...oppC	0.326471	0.134328	0.192142	0.00118961	0.0162614	More in Healthy
folE	0.326471	0.134328	0.192142	0.00118961	0.0162614	More in Healthy
pheA	0.326471	0.134328	0.192142	0.00118961	0.0162614	More in Healthy
group_1407	0.326471	0.134328	0.192142	0.00118961	0.0162614	More in Healthy
group_1376	0.326471	0.134328	0.192142	0.00118961	0.0162614	More in Healthy
yitT	0.326471	0.134328	0.192142	0.00118961	0.0162614	More in Healthy
group_1360	0.326471	0.134328	0.192142	0.00118961	0.0162614	More in Healthy
frmB	0.326471	0.134328	0.192142	0.00118961	0.0162614	More in Healthy
coaB	0.326471	0.134328	0.192142	0.00118961	0.0162614	More in Healthy
paaD	0.326471	0.134328	0.192142	0.00118961	0.0162614	More in Healthy
group_1283	0.326471	0.134328	0.192142	0.00118961	0.0162614	More in Healthy
group_1266	0.326471	0.134328	0.192142	0.00118961	0.0162614	More in Healthy
uup	0.326471	0.134328	0.192142	0.00118961	0.0162614	More in Healthy
nagC	0.326471	0.134328	0.192142	0.00118961	0.0162614	More in Healthy
group_1236	0.326471	0.134328	0.192142	0.00118961	0.0162614	More in Healthy
cca	0.326471	0.134328	0.192142	0.00118961	0.0162614	More in Healthy
group_1225	0.326471	0.134328	0.192142	0.00118961	0.0162614	More in Healthy
gdpP	0.326471	0.134328	0.192142	0.00118961	0.0162614	More in Healthy
group_1211	0.326471	0.134328	0.192142	0.00118961	0.0162614	More in Healthy
group_1210	0.326471	0.134328	0.192142	0.00118961	0.0162614	More in Healthy
pspC	0.326471	0.134328	0.192142	0.00118961	0.0162614	More in Healthy
group_1156	0.326471	0.134328	0.192142	0.00118961	0.0162614	More in Healthy
group_1144	0.326471	0.134328	0.192142	0.00118961	0.0162614	More in Healthy
apt	0.326471	0.134328	0.192142	0.00118961	0.0162614	More in Healthy
pbp3	0.326471	0.134328	0.192142	0.00118961	0.0162614	More in Healthy
ctsR	0.326471	0.134328	0.192142	0.00118961	0.0162614	More in Healthy
group_1085	0.326471	0.134328	0.192142	0.00118961	0.0162614	More in Healthy
lepB	0.326471	0.134328	0.192142	0.00118961	0.0162614	More in Healthy
nrdI	0.326471	0.134328	0.192142	0.00118961	0.0162614	More in Healthy
group_1074	0.326471	0.134328	0.192142	0.00118961	0.0162614	More in Healthy
prsA	0.326471	0.134328	0.192142	0.00118961	0.0162614	More in Healthy
spoVB	0.326471	0.134328	0.192142	0.00118961	0.0162614	More in Healthy
divIVA	0.326471	0.134328	0.192142	0.00118961	0.0162614	More in Healthy
group_1010	0.326471	0.134328	0.192142	0.00118961	0.0162614	More in Healthy
sodA	0.326471	0.134328	0.192142	0.00118961	0.0162614	More in Healthy
rnr	0.326471	0.134328	0.192142	0.00118961	0.0162614	More in Healthy
parC	0.326471	0.134328	0.192142	0.00118961	0.0162614	More in Healthy
metE	0.326471	0.134328	0.192142	0.00118961	0.0162614	More in Healthy
secE	0.326471	0.134328	0.192142	0.00118961	0.0162614	More in Healthy
citB	0.326471	0.134328	0.192142	0.00118961	0.0162614	More in Healthy
queC	0.326471	0.134328	0.192142	0.00118961	0.0162614	More in Healthy
group_15327	0.314706	0.134328	0.180378	0.00278992	0.0309791	More in Healthy
group_14980	0.323529	0.134328	0.189201	0.00181723	0.0217144	More in Healthy
merR...tipA	0.320588	0.0895522	0.231036	4.8405e-05	0.00457333	More in Healthy
group_14856	0.323529	0.134328	0.189201	0.00181723	0.0217144	More in Healthy
group_14656	0.323529	0.134328	0.189201	0.00181723	0.0217144	More in Healthy
group_14172	0.0941176	0.253731	-0.159614	0.000746001	0.0162614	More in Cancer
group_14070	0.323529	0.134328	0.189201	0.00181723	0.0217144	More in Healthy
dhaK	0.323529	0.134328	0.189201	0.00181723	0.0217144	More in Healthy
group_12048	0.323529	0.134328	0.189201	0.00181723	0.0217144	More in Healthy
trkG...ktrB	0.323529	0.134328	0.189201	0.00181723	0.0217144	More in Healthy
dhaM	0.323529	0.134328	0.189201	0.00181723	0.0217144	More in Healthy
group_11720	0.323529	0.134328	0.189201	0.00181723	0.0217144	More in Healthy
group_11628	0.323529	0.134328	0.189201	0.00181723	0.0217144	More in Healthy
group_11400	0.323529	0.134328	0.189201	0.00181723	0.0217144	More in Healthy
group_10867	0.323529	0.134328	0.189201	0.00181723	0.0217144	More in Healthy
group_10804	0.323529	0.134328	0.189201	0.00181723	0.0217144	More in Healthy
group_10790	0.323529	0.134328	0.189201	0.00181723	0.0217144	More in Healthy
pepX	0.323529	0.134328	0.189201	0.00181723	0.0217144	More in Healthy
glpF	0.326471	0.119403	0.207068	0.000390103	0.0159975	More in Healthy
group_10289	0.323529	0.134328	0.189201	0.00181723	0.0217144	More in Healthy
group_10282	0.323529	0.134328	0.189201	0.00181723	0.0217144	More in Healthy
tehB	0.323529	0.134328	0.189201	0.00181723	0.0217144	More in Healthy
group_10174	0.323529	0.134328	0.189201	0.00181723	0.0217144	More in Healthy
group_9858	0.323529	0.134328	0.189201	0.00181723	0.0217144	More in Healthy
fabZ...paaI	0.323529	0.134328	0.189201	0.00181723	0.0217144	More in Healthy
rhaT...eamA	0.323529	0.134328	0.189201	0.00181723	0.0217144	More in Healthy
ymdB	0.323529	0.134328	0.189201	0.00181723	0.0217144	More in Healthy
group_9501	0.323529	0.134328	0.189201	0.00181723	0.0217144	More in Healthy
group_9334	0.323529	0.134328	0.189201	0.00181723	0.0217144	More in Healthy
yocS	0.323529	0.134328	0.189201	0.00181723	0.0217144	More in Healthy
group_8891	0.323529	0.134328	0.189201	0.00181723	0.0217144	More in Healthy
gloB...yqgX	0.323529	0.134328	0.189201	0.00181723	0.0217144	More in Healthy
group_8817	0.323529	0.134328	0.189201	0.00181723	0.0217144	More in Healthy
argC	0.323529	0.134328	0.189201	0.00181723	0.0217144	More in Healthy
group_8722	0.323529	0.134328	0.189201	0.00181723	0.0217144	More in Healthy
group_8472	0.323529	0.134328	0.189201	0.00181723	0.0217144	More in Healthy
cpsC	0.323529	0.134328	0.189201	0.00181723	0.0217144	More in Healthy
group_8094	0.323529	0.134328	0.189201	0.00181723	0.0217144	More in Healthy
eRG12	0.323529	0.134328	0.189201	0.00181723	0.0217144	More in Healthy
argJ	0.323529	0.134328	0.189201	0.00181723	0.0217144	More in Healthy
group_7509	0.323529	0.134328	0.189201	0.00181723	0.0217144	More in Healthy
group_7150	0.323529	0.134328	0.189201	0.00181723	0.0217144	More in Healthy
yajL	0.323529	0.134328	0.189201	0.00181723	0.0217144	More in Healthy
alr	0.323529	0.134328	0.189201	0.00181723	0.0217144	More in Healthy
coaD	0.323529	0.134328	0.189201	0.00181723	0.0217144	More in Healthy
group_6801	0.323529	0.134328	0.189201	0.00181723	0.0217144	More in Healthy
kdpD	0.323529	0.134328	0.189201	0.00181723	0.0217144	More in Healthy
ompR	0.323529	0.134328	0.189201	0.00181723	0.0217144	More in Healthy
yigB	0.323529	0.134328	0.189201	0.00181723	0.0217144	More in Healthy
group_6512	0.323529	0.134328	0.189201	0.00181723	0.0217144	More in Healthy
group_6503	0.323529	0.134328	0.189201	0.00181723	0.0217144	More in Healthy
yheI...mdlB	0.323529	0.134328	0.189201	0.00181723	0.0217144	More in Healthy
group_6476	0.323529	0.134328	0.189201	0.00181723	0.0217144	More in Healthy
group_6468	0.323529	0.134328	0.189201	0.00181723	0.0217144	More in Healthy
group_6163	0.323529	0.134328	0.189201	0.00181723	0.0217144	More in Healthy
malR...lacI	0.323529	0.134328	0.189201	0.00181723	0.0217144	More in Healthy
group_6008	0.323529	0.134328	0.189201	0.00181723	0.0217144	More in Healthy
group_5946	0.323529	0.134328	0.189201	0.00181723	0.0217144	More in Healthy
gorA	0.323529	0.134328	0.189201	0.00181723	0.0217144	More in Healthy
group_5459	0.323529	0.134328	0.189201	0.00181723	0.0217144	More in Healthy
niaX	0.323529	0.134328	0.189201	0.00181723	0.0217144	More in Healthy
pyrK...mcr1	0.323529	0.134328	0.189201	0.00181723	0.0217144	More in Healthy
rsuA	0.323529	0.134328	0.189201	0.00181723	0.0217144	More in Healthy
sdrC	0.323529	0.134328	0.189201	0.00181723	0.0217144	More in Healthy
group_4927	0.323529	0.134328	0.189201	0.00181723	0.0217144	More in Healthy
group_4812	0.323529	0.134328	0.189201	0.00181723	0.0217144	More in Healthy
argD	0.323529	0.134328	0.189201	0.00181723	0.0217144	More in Healthy
group_4731	0.323529	0.134328	0.189201	0.00181723	0.0217144	More in Healthy
group_4684	0.326471	0.134328	0.192142	0.00118961	0.0162614	More in Healthy
proA	0.323529	0.134328	0.189201	0.00181723	0.0217144	More in Healthy
group_4420	0.0823529	0.208955	-0.126602	0.00383207	0.0358048	More in Cancer
group_4343	0.323529	0.134328	0.189201	0.00181723	0.0217144	More in Healthy
group_4287	0.323529	0.134328	0.189201	0.00181723	0.0217144	More in Healthy
manA	0.323529	0.134328	0.189201	0.00181723	0.0217144	More in Healthy
ftsW	0.323529	0.134328	0.189201	0.00181723	0.0217144	More in Healthy
mdh	0.323529	0.134328	0.189201	0.00181723	0.0217144	More in Healthy
group_3160	0.323529	0.134328	0.189201	0.00181723	0.0217144	More in Healthy
acuB	0.326471	0.119403	0.207068	0.000390103	0.0159975	More in Healthy
group_1971	0.323529	0.134328	0.189201	0.00181723	0.0217144	More in Healthy
yqeG	0.323529	0.134328	0.189201	0.00181723	0.0217144	More in Healthy
fatA	0.323529	0.134328	0.189201	0.00181723	0.0217144	More in Healthy
group_1690	0.323529	0.134328	0.189201	0.00181723	0.0217144	More in Healthy
group_1549	0.323529	0.134328	0.189201	0.00181723	0.0217144	More in Healthy
group_1446	0.323529	0.134328	0.189201	0.00181723	0.0217144	More in Healthy
group_1435	0.323529	0.134328	0.189201	0.00181723	0.0217144	More in Healthy
proB	0.323529	0.134328	0.189201	0.00181723	0.0217144	More in Healthy
group_1198	0.323529	0.134328	0.189201	0.00181723	0.0217144	More in Healthy
copY	0.323529	0.134328	0.189201	0.00181723	0.0217144	More in Healthy
group_1071	0.323529	0.134328	0.189201	0.00181723	0.0217144	More in Healthy
group_1045	0.323529	0.134328	0.189201	0.00181723	0.0217144	More in Healthy
corA	0.323529	0.134328	0.189201	0.00181723	0.0217144	More in Healthy
recR	0.323529	0.134328	0.189201	0.00181723	0.0217144	More in Healthy
cpsC...yveK	0.320588	0.134328	0.18626	0.00181476	0.0217144	More in Healthy
group_13416	0.320588	0.134328	0.18626	0.00181476	0.0217144	More in Healthy
group_13413	0.320588	0.134328	0.18626	0.00181476	0.0217144	More in Healthy
group_12665	0.0588235	0.223881	-0.165057	9.16076e-05	0.0059768	More in Cancer
dhaL	0.320588	0.134328	0.18626	0.00181476	0.0217144	More in Healthy
group_11158	0.320588	0.134328	0.18626	0.00181476	0.0217144	More in Healthy
group_10608	0.320588	0.134328	0.18626	0.00181476	0.0217144	More in Healthy
cbiX	0.323529	0.119403	0.204126	0.000601481	0.0162614	More in Healthy
phaF	0.320588	0.134328	0.18626	0.00181476	0.0217144	More in Healthy
nit2	0.320588	0.134328	0.18626	0.00181476	0.0217144	More in Healthy
aarF	0.320588	0.134328	0.18626	0.00181476	0.0217144	More in Healthy
group_9286	0.320588	0.134328	0.18626	0.00181476	0.0217144	More in Healthy
group_9284	0.320588	0.134328	0.18626	0.00181476	0.0217144	More in Healthy
group_9276	0.320588	0.134328	0.18626	0.00181476	0.0217144	More in Healthy
group_8858	0.326471	0.104478	0.221993	0.000114824	0.00628727	More in Healthy
group_8759	0.320588	0.134328	0.18626	0.00181476	0.0217144	More in Healthy
yjjU	0.320588	0.134328	0.18626	0.00181476	0.0217144	More in Healthy
group_8692	0.326471	0.104478	0.221993	0.000114824	0.00628727	More in Healthy
pcpA	0.111765	0.253731	-0.141967	0.00518908	0.0421646	More in Cancer
group_7894	0.320588	0.134328	0.18626	0.00181476	0.0217144	More in Healthy
nfnB	0.320588	0.134328	0.18626	0.00181476	0.0217144	More in Healthy
group_7244	0.320588	0.134328	0.18626	0.00181476	0.0217144	More in Healthy
group_7241	0.320588	0.134328	0.18626	0.00181476	0.0217144	More in Healthy
group_7157	0.320588	0.134328	0.18626	0.00181476	0.0217144	More in Healthy
puuD	0.320588	0.134328	0.18626	0.00181476	0.0217144	More in Healthy
group_6701	0.320588	0.134328	0.18626	0.00181476	0.0217144	More in Healthy
fieF	0.320588	0.134328	0.18626	0.00181476	0.0217144	More in Healthy
nupN	0.320588	0.134328	0.18626	0.00181476	0.0217144	More in Healthy
cpdA	0.320588	0.134328	0.18626	0.00181476	0.0217144	More in Healthy
mgtA	0.320588	0.134328	0.18626	0.00181476	0.0217144	More in Healthy
group_5864	0.320588	0.134328	0.18626	0.00181476	0.0217144	More in Healthy
rex	0.320588	0.134328	0.18626	0.00181476	0.0217144	More in Healthy
group_5354	0.320588	0.134328	0.18626	0.00181476	0.0217144	More in Healthy
group_4989	0.320588	0.134328	0.18626	0.00181476	0.0217144	More in Healthy
group_4943	0.320588	0.134328	0.18626	0.00181476	0.0217144	More in Healthy
glpG	0.326471	0.104478	0.221993	0.000114824	0.00628727	More in Healthy
group_4877	0.320588	0.134328	0.18626	0.00181476	0.0217144	More in Healthy
radC	0.320588	0.134328	0.18626	0.00181476	0.0217144	More in Healthy
pabB	0.320588	0.134328	0.18626	0.00181476	0.0217144	More in Healthy
ezrA	0.320588	0.134328	0.18626	0.00181476	0.0217144	More in Healthy
pdhA	0.320588	0.134328	0.18626	0.00181476	0.0217144	More in Healthy
gph	0.320588	0.134328	0.18626	0.00181476	0.0217144	More in Healthy
yraQ	0.320588	0.134328	0.18626	0.00181476	0.0217144	More in Healthy
mglC	0.320588	0.134328	0.18626	0.00181476	0.0217144	More in Healthy
group_10526	0.326471	0.0895522	0.236918	4.76691e-05	0.00457333	More in Healthy
phoE	0.317647	0.134328	0.183319	0.00185643	0.0218977	More in Healthy
perM	0.317647	0.134328	0.183319	0.00185643	0.0218977	More in Healthy
group_10104	0.317647	0.134328	0.183319	0.00185643	0.0218977	More in Healthy
group_9993	0.317647	0.134328	0.183319	0.00185643	0.0218977	More in Healthy
group_9834	0.317647	0.134328	0.183319	0.00185643	0.0218977	More in Healthy
group_9406	0.317647	0.134328	0.183319	0.00185643	0.0218977	More in Healthy
birA	0.317647	0.134328	0.183319	0.00185643	0.0218977	More in Healthy
group_8741	0.1	0.253731	-0.153731	0.00182198	0.0217577	More in Cancer
group_7224	0.326471	0.0895522	0.236918	4.76691e-05	0.00457333	More in Healthy
msrC	0.317647	0.134328	0.183319	0.00185643	0.0218977	More in Healthy
glnK	0.323529	0.134328	0.189201	0.00181723	0.0217144	More in Healthy
group_6066	0.317647	0.134328	0.183319	0.00185643	0.0218977	More in Healthy
miaA	0.317647	0.134328	0.183319	0.00185643	0.0218977	More in Healthy
group_4924	0.320588	0.134328	0.18626	0.00181476	0.0217144	More in Healthy
group_3647	0.323529	0.134328	0.189201	0.00181723	0.0217144	More in Healthy
group_3643	0.317647	0.134328	0.183319	0.00185643	0.0218977	More in Healthy
group_3525	0.317647	0.134328	0.183319	0.00185643	0.0218977	More in Healthy
group_3021	0.317647	0.134328	0.183319	0.00185643	0.0218977	More in Healthy
group_2625	0.320588	0.134328	0.18626	0.00181476	0.0217144	More in Healthy
group_2315	0.317647	0.134328	0.183319	0.00185643	0.0218977	More in Healthy
group_14046	0.305882	0.134328	0.171554	0.00422985	0.0358048	More in Healthy
group_9409	0.320588	0.104478	0.216111	0.00018204	0.00901962	More in Healthy
group_9107	0.314706	0.134328	0.180378	0.00278992	0.0309791	More in Healthy
group_8128	0.317647	0.119403	0.198244	0.000629323	0.0162614	More in Healthy
group_7909	0.314706	0.134328	0.180378	0.00278992	0.0309791	More in Healthy
group_7733	0.317647	0.134328	0.183319	0.00185643	0.0218977	More in Healthy
group_6370	0.314706	0.134328	0.180378	0.00278992	0.0309791	More in Healthy
group_5332	0.320588	0.104478	0.216111	0.00018204	0.00901962	More in Healthy
group_4320	0.323529	0.0895522	0.233977	4.7093e-05	0.00457333	More in Healthy
group_1129	0.314706	0.134328	0.180378	0.00278992	0.0309791	More in Healthy
group_17706	0.320588	0.0895522	0.231036	4.8405e-05	0.00457333	More in Healthy
group_14673	0.320588	0.0895522	0.231036	4.8405e-05	0.00457333	More in Healthy
spaA	0.302941	0.134328	0.168613	0.00424407	0.0358048	More in Healthy
acm	0.320588	0.0895522	0.231036	4.8405e-05	0.00457333	More in Healthy
group_7987	0.305882	0.0895522	0.21633	0.000133864	0.00704454	More in Healthy
group_7831	0.320588	0.0895522	0.231036	4.8405e-05	0.00457333	More in Healthy
group_7824	0.320588	0.0895522	0.231036	4.8405e-05	0.00457333	More in Healthy
group_7614	0.320588	0.0895522	0.231036	4.8405e-05	0.00457333	More in Healthy
group_7605	0.320588	0.0895522	0.231036	4.8405e-05	0.00457333	More in Healthy
group_7498	0.320588	0.0895522	0.231036	4.8405e-05	0.00457333	More in Healthy
group_7002	0.320588	0.0895522	0.231036	4.8405e-05	0.00457333	More in Healthy
group_6980	0.320588	0.0895522	0.231036	4.8405e-05	0.00457333	More in Healthy
group_6683	0.320588	0.0895522	0.231036	4.8405e-05	0.00457333	More in Healthy
group_6496	0.320588	0.0895522	0.231036	4.8405e-05	0.00457333	More in Healthy
group_6326	0.320588	0.0895522	0.231036	4.8405e-05	0.00457333	More in Healthy
group_6154	0.320588	0.0895522	0.231036	4.8405e-05	0.00457333	More in Healthy
yfeB	0.320588	0.0895522	0.231036	4.8405e-05	0.00457333	More in Healthy
group_6001	0.320588	0.0895522	0.231036	4.8405e-05	0.00457333	More in Healthy
group_6000	0.320588	0.0895522	0.231036	4.8405e-05	0.00457333	More in Healthy
group_5995	0.320588	0.0895522	0.231036	4.8405e-05	0.00457333	More in Healthy
group_5981	0.320588	0.0895522	0.231036	4.8405e-05	0.00457333	More in Healthy
group_5889	0.320588	0.0895522	0.231036	4.8405e-05	0.00457333	More in Healthy
group_5617	0.320588	0.0895522	0.231036	4.8405e-05	0.00457333	More in Healthy
group_5595	0.311765	0.134328	0.177436	0.00279294	0.0309791	More in Healthy
hisC	0.320588	0.0895522	0.231036	4.8405e-05	0.00457333	More in Healthy
yckB	0.320588	0.0895522	0.231036	4.8405e-05	0.00457333	More in Healthy
group_5101	0.320588	0.0895522	0.231036	4.8405e-05	0.00457333	More in Healthy
group_4925	0.320588	0.0895522	0.231036	4.8405e-05	0.00457333	More in Healthy
group_4849	0.320588	0.0895522	0.231036	4.8405e-05	0.00457333	More in Healthy
group_4829	0.320588	0.0895522	0.231036	4.8405e-05	0.00457333	More in Healthy
group_4742	0.320588	0.0895522	0.231036	4.8405e-05	0.00457333	More in Healthy
group_4723	0.320588	0.0895522	0.231036	4.8405e-05	0.00457333	More in Healthy
group_4654	0.320588	0.0895522	0.231036	4.8405e-05	0.00457333	More in Healthy
group_4411	0.320588	0.0895522	0.231036	4.8405e-05	0.00457333	More in Healthy
group_4288	0.320588	0.0895522	0.231036	4.8405e-05	0.00457333	More in Healthy
group_4175	0.317647	0.134328	0.183319	0.00185643	0.0218977	More in Healthy
group_4152	0.320588	0.0895522	0.231036	4.8405e-05	0.00457333	More in Healthy
group_4085	0.320588	0.0895522	0.231036	4.8405e-05	0.00457333	More in Healthy
group_4075	0.320588	0.0895522	0.231036	4.8405e-05	0.00457333	More in Healthy
group_3911	0.320588	0.0895522	0.231036	4.8405e-05	0.00457333	More in Healthy
group_3780	0.320588	0.0895522	0.231036	4.8405e-05	0.00457333	More in Healthy
group_3635	0.320588	0.0895522	0.231036	4.8405e-05	0.00457333	More in Healthy
group_3615	0.320588	0.0895522	0.231036	4.8405e-05	0.00457333	More in Healthy
group_3468	0.320588	0.0895522	0.231036	4.8405e-05	0.00457333	More in Healthy
group_3409	0.320588	0.0895522	0.231036	4.8405e-05	0.00457333	More in Healthy
group_3244	0.320588	0.0895522	0.231036	4.8405e-05	0.00457333	More in Healthy
group_3161	0.320588	0.0895522	0.231036	4.8405e-05	0.00457333	More in Healthy
hisZ	0.320588	0.0895522	0.231036	4.8405e-05	0.00457333	More in Healthy
group_2722	0.320588	0.0895522	0.231036	4.8405e-05	0.00457333	More in Healthy
group_2450	0.320588	0.0895522	0.231036	4.8405e-05	0.00457333	More in Healthy
group_2434	0.320588	0.0895522	0.231036	4.8405e-05	0.00457333	More in Healthy
group_2389	0.320588	0.0895522	0.231036	4.8405e-05	0.00457333	More in Healthy
ideR...mntR	0.320588	0.0895522	0.231036	4.8405e-05	0.00457333	More in Healthy
fasA	0.320588	0.0895522	0.231036	4.8405e-05	0.00457333	More in Healthy
group_1763	0.320588	0.0895522	0.231036	4.8405e-05	0.00457333	More in Healthy
group_1673	0.320588	0.0895522	0.231036	4.8405e-05	0.00457333	More in Healthy
group_1657	0.320588	0.0895522	0.231036	4.8405e-05	0.00457333	More in Healthy
group_1546	0.320588	0.0895522	0.231036	4.8405e-05	0.00457333	More in Healthy
group_1373	0.320588	0.0895522	0.231036	4.8405e-05	0.00457333	More in Healthy
group_1311	0.320588	0.0895522	0.231036	4.8405e-05	0.00457333	More in Healthy
group_1285	0.320588	0.0895522	0.231036	4.8405e-05	0.00457333	More in Healthy
group_1174	0.320588	0.0895522	0.231036	4.8405e-05	0.00457333	More in Healthy
ftf	0.320588	0.0895522	0.231036	4.8405e-05	0.00457333	More in Healthy
group_10831	0.320588	0.0895522	0.231036	4.8405e-05	0.00457333	More in Healthy
group_10585	0.317647	0.0895522	0.228095	8.04481e-05	0.00561796	More in Healthy
bioH	0.317647	0.0895522	0.228095	8.04481e-05	0.00561796	More in Healthy
group_8156	0.317647	0.0895522	0.228095	8.04481e-05	0.00561796	More in Healthy
group_7610	0.308824	0.134328	0.174495	0.00285973	0.0313173	More in Healthy
group_7528	0.317647	0.0895522	0.228095	8.04481e-05	0.00561796	More in Healthy
group_7527	0.317647	0.0895522	0.228095	8.04481e-05	0.00561796	More in Healthy
group_6949	0.317647	0.0895522	0.228095	8.04481e-05	0.00561796	More in Healthy
group_6658	0.317647	0.0895522	0.228095	8.04481e-05	0.00561796	More in Healthy
group_6461	0.317647	0.0895522	0.228095	8.04481e-05	0.00561796	More in Healthy
group_6026	0.317647	0.0895522	0.228095	8.04481e-05	0.00561796	More in Healthy
group_6025	0.317647	0.0895522	0.228095	8.04481e-05	0.00561796	More in Healthy
group_5602	0.314706	0.134328	0.180378	0.00278992	0.0309791	More in Healthy
group_5439	0.317647	0.0895522	0.228095	8.04481e-05	0.00561796	More in Healthy
pdxS	0.317647	0.0895522	0.228095	8.04481e-05	0.00561796	More in Healthy
group_4891	0.317647	0.0895522	0.228095	8.04481e-05	0.00561796	More in Healthy
group_3789	0.317647	0.0895522	0.228095	8.04481e-05	0.00561796	More in Healthy
ywzB	0.317647	0.119403	0.198244	0.000629323	0.0162614	More in Healthy
group_3529	0.317647	0.0895522	0.228095	8.04481e-05	0.00561796	More in Healthy
group_2851	0.317647	0.0895522	0.228095	8.04481e-05	0.00561796	More in Healthy
group_2723	0.317647	0.0895522	0.228095	8.04481e-05	0.00561796	More in Healthy
group_2416	0.317647	0.0895522	0.228095	8.04481e-05	0.00561796	More in Healthy
tkt	0.317647	0.0895522	0.228095	8.04481e-05	0.00561796	More in Healthy
group_16690	0.302941	0.104478	0.198464	0.000486872	0.0162614	More in Healthy
group_11703	0.314706	0.0895522	0.225154	7.98793e-05	0.00561796	More in Healthy
group_11266	0.0352941	0.149254	-0.11396	0.000964943	0.0162614	More in Cancer
group_10322	0.314706	0.0895522	0.225154	7.98793e-05	0.00561796	More in Healthy
group_8937	0.314706	0.0895522	0.225154	7.98793e-05	0.00561796	More in Healthy
group_7672	0.314706	0.0895522	0.225154	7.98793e-05	0.00561796	More in Healthy
group_7061	0.317647	0.0746269	0.24302	1.91747e-05	0.00345396	More in Healthy
group_6985	0.314706	0.0895522	0.225154	7.98793e-05	0.00561796	More in Healthy
group_6659	0.314706	0.0895522	0.225154	7.98793e-05	0.00561796	More in Healthy
group_5998	0.314706	0.0895522	0.225154	7.98793e-05	0.00561796	More in Healthy
group_5636	0.308824	0.134328	0.174495	0.00285973	0.0313173	More in Healthy
group_5194	0.317647	0.0895522	0.228095	8.04481e-05	0.00561796	More in Healthy
yhaH	0.305882	0.134328	0.171554	0.00422985	0.0358048	More in Healthy
group_4121	0.308824	0.134328	0.174495	0.00285973	0.0313173	More in Healthy
group_4083	0.314706	0.0895522	0.225154	7.98793e-05	0.00561796	More in Healthy
pyrR	0.314706	0.0895522	0.225154	7.98793e-05	0.00561796	More in Healthy
group_3637	0.314706	0.0895522	0.225154	7.98793e-05	0.00561796	More in Healthy
group_3291	0.314706	0.0895522	0.225154	7.98793e-05	0.00561796	More in Healthy
hicB	0.314706	0.0895522	0.225154	7.98793e-05	0.00561796	More in Healthy
group_2150	0.314706	0.0895522	0.225154	7.98793e-05	0.00561796	More in Healthy
group_1581	0.314706	0.134328	0.180378	0.00278992	0.0309791	More in Healthy
group_15296	0.0676471	0.19403	-0.126383	0.00329104	0.0343989	More in Cancer
group_10377	0.305882	0.119403	0.186479	0.00149668	0.0201025	More in Healthy
group_8471	0.305882	0.134328	0.171554	0.00422985	0.0358048	More in Healthy
group_7525	0.311765	0.0895522	0.222212	8.23699e-05	0.00569031	More in Healthy
group_3758	0.123529	0.268657	-0.145127	0.00417388	0.0358048	More in Cancer
group_2382	0.317647	0.0895522	0.228095	8.04481e-05	0.00561796	More in Healthy
group_14075	0.311765	0.0746269	0.237138	1.97299e-05	0.00348875	More in Healthy
group_6620	0.302941	0.119403	0.183538	0.00151706	0.0203337	More in Healthy
group_5730	0.308824	0.0895522	0.219271	0.000134136	0.00704454	More in Healthy
group_3778	0.314706	0.0895522	0.225154	7.98793e-05	0.00561796	More in Healthy
fabZ	0.308824	0.0895522	0.219271	0.000134136	0.00704454	More in Healthy
group_10956	0.3	0.134328	0.165672	0.00434901	0.0361617	More in Healthy
group_7689	0.314706	0.0895522	0.225154	7.98793e-05	0.00561796	More in Healthy
group_6475	0.302941	0.134328	0.168613	0.00424407	0.0358048	More in Healthy
group_6024	0.314706	0.0597015	0.255004	3.89e-06	0.00141078	More in Healthy
group_4782	0.311765	0.0895522	0.222212	8.23699e-05	0.00569031	More in Healthy
group_1016	0.305882	0.0895522	0.21633	0.000133864	0.00704454	More in Healthy
group_7526	0.311765	0.0597015	0.252063	4.02579e-06	0.00141078	More in Healthy
group_7055	0.0735294	0.238806	-0.165277	0.000201496	0.00935814	More in Cancer
group_6513	0.305882	0.0895522	0.21633	0.000133864	0.00704454	More in Healthy
group_2873	0.311765	0.0746269	0.237138	1.97299e-05	0.00348875	More in Healthy
group_10589	0.308824	0.0895522	0.219271	0.000134136	0.00704454	More in Healthy
group_7665	0.308824	0.0895522	0.219271	0.000134136	0.00704454	More in Healthy
treR...ubiC...mngR	0.302941	0.119403	0.183538	0.00151706	0.0203337	More in Healthy
group_5195	0.302941	0.0895522	0.213389	0.000138481	0.00725292	More in Healthy
group_14760	0.126471	0.268657	-0.142186	0.00479894	0.0392093	More in Cancer
group_13933	0.0705882	0.208955	-0.138367	0.00186793	0.0220198	More in Cancer
group_13122	0.0764706	0.208955	-0.132485	0.00253365	0.0286826	More in Cancer
group_8948	0.0735294	0.238806	-0.165277	0.000201496	0.00935814	More in Cancer
group_8211	0.0735294	0.238806	-0.165277	0.000201496	0.00935814	More in Cancer
group_7900	0.0735294	0.223881	-0.150351	0.000568365	0.0162614	More in Cancer
group_6952	0.297059	0.0895522	0.207507	0.000221702	0.0100307	More in Healthy
ompA	0.0735294	0.223881	-0.150351	0.000568365	0.0162614	More in Cancer
group_3646	0.302941	0.119403	0.183538	0.00151706	0.0203337	More in Healthy
crcB	0.297059	0.0746269	0.222432	5.64113e-05	0.00503367	More in Healthy
group_6994	0.288235	0.119403	0.168832	0.00354605	0.0358048	More in Healthy
group_6779	0.297059	0.0895522	0.207507	0.000221702	0.0100307	More in Healthy
group_6534	0.297059	0.0746269	0.222432	5.64113e-05	0.00503367	More in Healthy
amiA	0.297059	0.0746269	0.222432	5.64113e-05	0.00503367	More in Healthy
group_9551	0.297059	0.0746269	0.222432	5.64113e-05	0.00503367	More in Healthy
group_7880	0.0588235	0.223881	-0.165057	9.16076e-05	0.0059768	More in Cancer
group_7744	0.0352941	0.164179	-0.128885	0.000292533	0.0125855	More in Cancer
group_3638	0.3	0.0746269	0.225373	5.61605e-05	0.00503367	More in Healthy
group_1170	0.288235	0.104478	0.183758	0.00120456	0.016454	More in Healthy
group_10091	0.273529	0.104478	0.169052	0.00288719	0.0315622	More in Healthy
group_6716	0.291176	0.0746269	0.21655	9.45073e-05	0.0059768	More in Healthy
group_3398	0.291176	0.119403	0.171773	0.00356441	0.0358048	More in Healthy
group_14377	0.0794118	0.208955	-0.129543	0.00309263	0.0330052	More in Cancer
group_13610	0.0588235	0.208955	-0.150132	0.000282045	0.012383	More in Cancer
group_13593	0.0588235	0.208955	-0.150132	0.000282045	0.012383	More in Cancer
group_9445	0.0558824	0.208955	-0.153073	0.000190642	0.00920844	More in Cancer
group_9098	0.0676471	0.19403	-0.126383	0.00329104	0.0343989	More in Cancer
group_8274	0.0470588	0.223881	-0.176822	1.46744e-05	0.0031535	More in Cancer
group_904	0.288235	0.0746269	0.213608	9.5497e-05	0.0059768	More in Healthy
group_8155	0.282353	0.0895522	0.192801	0.000580318	0.0162614	More in Healthy
group_8879	0.0470588	0.238806	-0.191747	4.0036e-06	0.00141078	More in Cancer
group_8233	0.276471	0.0895522	0.186918	0.000937608	0.0162614	More in Healthy
group_1732	0.282353	0.0895522	0.192801	0.000580318	0.0162614	More in Healthy
group_9078	0.0470588	0.208955	-0.161896	5.13045e-05	0.00470878	More in Cancer
pnuC	0.0470588	0.253731	-0.206673	1.04424e-06	0.000591959	More in Cancer
group_6157	0.285294	0.0597015	0.225593	2.26049e-05	0.00375592	More in Healthy
group_5933	0.273529	0.0746269	0.198903	0.000259207	0.0115114	More in Healthy
nisE	0.288235	0.0597015	0.228534	2.14927e-05	0.00373198	More in Healthy
group_10319	0.0647059	0.208955	-0.144249	0.000582205	0.0162614	More in Cancer
group_7128	0.273529	0.0746269	0.198903	0.000259207	0.0115114	More in Healthy
nisG	0.285294	0.0597015	0.225593	2.26049e-05	0.00375592	More in Healthy
group_5986	0.267647	0.0895522	0.178095	0.00146988	0.0197701	More in Healthy
group_15320	0.0735294	0.253731	-0.180202	6.79291e-05	0.00561796	More in Cancer
group_10306	0.0617647	0.179104	-0.11734	0.00511847	0.0416259	More in Cancer
group_7709	0.0676471	0.298507	-0.23086	7.70413e-07	0.000464029	More in Cancer
group_11623	0.0647059	0.208955	-0.144249	0.000582205	0.0162614	More in Cancer
group_9514	0.273529	0.0597015	0.213828	6.24051e-05	0.00546725	More in Healthy
ftsQ...divIB	0.0470588	0.208955	-0.161896	5.13045e-05	0.00470878	More in Cancer
group_7559	0.264706	0.0746269	0.190079	0.000422665	0.0162614	More in Healthy
group_4860	0.0470588	0.208955	-0.161896	5.13045e-05	0.00470878	More in Cancer
group_13254	0.252941	0.0746269	0.178314	0.000704203	0.0162614	More in Healthy
group_9017	0.0441176	0.208955	-0.164838	3.14142e-05	0.00457333	More in Cancer
group_15006	0.235294	0.0746269	0.160667	0.00268883	0.0300781	More in Healthy
group_12762	0.0558824	0.208955	-0.153073	0.000190642	0.00920844	More in Cancer
group_11519	0.0441176	0.223881	-0.179763	8.68244e-06	0.00257454	More in Cancer
group_11007	0.0382353	0.208955	-0.17072	1.07014e-05	0.00294655	More in Cancer
group_10170	0.0764706	0.223881	-0.14741	0.00118847	0.0162614	More in Cancer
group_8367	0.255882	0.0895522	0.16633	0.00227398	0.0261195	More in Healthy
group_6992	0.0382353	0.208955	-0.17072	1.07014e-05	0.00294655	More in Cancer
group_5997	0.264706	0.0597015	0.205004	0.000105109	0.0059768	More in Healthy
group_7507	0.261765	0.0597015	0.202063	0.000108077	0.00605543	More in Healthy
group_14805	0.05	0.179104	-0.129104	0.000797861	0.0162614	More in Cancer
group_10638	0.176471	0.0447761	0.131694	0.00494673	0.0403484	More in Healthy
group_6281	0.25	0.0746269	0.175373	0.00108433	0.0162614	More in Healthy
group_3660	0.255882	0.0597015	0.196181	0.000175382	0.00874957	More in Healthy
group_13839	0.258824	0.0895522	0.169271	0.00228048	0.0261787	More in Healthy
group_11980	0.235294	0.0746269	0.160667	0.00268883	0.0300781	More in Healthy
group_11918	0.0735294	0.19403	-0.1205	0.00459795	0.0379884	More in Cancer
group_11507	0.111765	0.268657	-0.156892	0.00156661	0.0209105	More in Cancer
group_9381	0.241176	0.0895522	0.151624	0.00532119	0.0430927	More in Healthy
group_5651	0.252941	0.0746269	0.178314	0.000704203	0.0162614	More in Healthy
group_13109	0.247059	0.0895522	0.157507	0.00350842	0.0358048	More in Healthy
group_8006	0.0382353	0.223881	-0.185645	2.75213e-06	0.0011051	More in Cancer
group_1515	0.247059	0.0746269	0.172432	0.00109015	0.0162614	More in Healthy
group_8374	0.214706	0.0597015	0.155004	0.00191485	0.0224916	More in Healthy
group_6675	0.0470588	0.208955	-0.161896	5.13045e-05	0.00470878	More in Cancer
group_5149	0.244118	0.0746269	0.169491	0.00173813	0.0217144	More in Healthy
group_8887	0.241176	0.0597015	0.181475	0.000469627	0.0162614	More in Healthy
group_9552	0.0764706	0.238806	-0.162335	0.000283691	0.0123988	More in Cancer
group_9366	0.238235	0.0597015	0.178534	0.000474991	0.0162614	More in Healthy
rloF	0.0764706	0.238806	-0.162335	0.000283691	0.0123988	More in Cancer
group_8277	0.0852941	0.238806	-0.153512	0.000909611	0.0162614	More in Cancer
group_7933	0.0852941	0.238806	-0.153512	0.000909611	0.0162614	More in Cancer
group_7932	0.0852941	0.238806	-0.153512	0.000909611	0.0162614	More in Cancer
group_4965	0.241176	0.0447761	0.1964	0.000108607	0.00606748	More in Healthy
group_14035	0.114706	0.268657	-0.153951	0.0018785	0.022131	More in Cancer
group_9587	0.241176	0.0746269	0.16655	0.00170539	0.0217144	More in Healthy
group_7173	0.0823529	0.223881	-0.141528	0.00168287	0.0217144	More in Cancer
group_11359	0.111765	0.253731	-0.141967	0.00518908	0.0421646	More in Cancer
group_6398	0.25	0.0597015	0.190299	0.000288938	0.012499	More in Healthy
group_9429	0.0470588	0.208955	-0.161896	5.13045e-05	0.00470878	More in Cancer
group_6368	0.244118	0.0447761	0.199342	6.66074e-05	0.00561796	More in Healthy
group_14210	0.0617647	0.208955	-0.147191	0.000409003	0.0162614	More in Cancer
group_6984	0.223529	0.0746269	0.148903	0.00409782	0.0358048	More in Healthy
group_2055	0.235294	0.0746269	0.160667	0.00268883	0.0300781	More in Healthy
group_782	0.226471	0.0447761	0.181694	0.000303875	0.0129865	More in Healthy
acpA...acpB	0.0323529	0.223881	-0.191528	7.45024e-07	0.000463212	More in Cancer
group_11526	0.229412	0.0298507	0.199561	3.45074e-05	0.00457333	More in Healthy
group_11666	0.244118	0.0149254	0.229192	1.5318e-06	0.000797943	More in Healthy
group_8856	0.0323529	0.19403	-0.161677	1.25758e-05	0.0030613	More in Cancer
group_6219	0.217647	0.0447761	0.172871	0.000492305	0.0162614	More in Healthy
group_8717	0.235294	0.0447761	0.190518	0.000113692	0.00628727	More in Healthy
group_11203	0.220588	0.0298507	0.190737	5.92602e-05	0.00521544	More in Healthy
group_9362	0.202941	0.0597015	0.14324	0.00468187	0.0384747	More in Healthy
group_4520	0.223529	0.0447761	0.178753	0.000297819	0.0127843	More in Healthy
group_17802	0.217647	0.0597015	0.157946	0.00191495	0.0224916	More in Healthy
group_9648	0.208824	0.0597015	0.149122	0.00298429	0.0319678	More in Healthy
thiM	0.0264706	0.238806	-0.212335	3.48049e-08	4.4722e-05	More in Cancer
thiE1...thiE	0.0264706	0.238806	-0.212335	3.48049e-08	4.4722e-05	More in Cancer
group_8992	0.0205882	0.19403	-0.173442	6.784e-07	0.000450879	More in Cancer
group_6009	0.217647	0.0597015	0.157946	0.00191495	0.0224916	More in Healthy
group_3648	0.217647	0.0597015	0.157946	0.00191495	0.0224916	More in Healthy
group_12195	0.0323529	0.223881	-0.191528	7.45024e-07	0.000463212	More in Cancer
group_8791	0.202941	0.0597015	0.14324	0.00468187	0.0384747	More in Healthy
group_8245	0.0441176	0.149254	-0.105136	0.00319127	0.0336897	More in Cancer
group_7148	0.0441176	0.149254	-0.105136	0.00319127	0.0336897	More in Cancer
group_2974	0.214706	0.0149254	0.199781	1.58523e-05	0.0031535	More in Healthy
group_1227	0.0441176	0.208955	-0.164838	3.14142e-05	0.00457333	More in Cancer
group_17865	0.214706	0.0298507	0.184855	9.98877e-05	0.0059768	More in Healthy
group_9037	0.211765	0.0149254	0.196839	1.51872e-05	0.0031535	More in Healthy
group_3636	0.214706	0.0298507	0.184855	9.98877e-05	0.0059768	More in Healthy
group_15217	0.0911765	0.253731	-0.162555	0.000597158	0.0162614	More in Cancer
group_9070	0.2	0.0597015	0.140299	0.00461206	0.0379884	More in Healthy
group_6392	0.0264706	0.19403	-0.167559	3.3043e-06	0.00127374	More in Cancer
group_7772	0.2	0.0597015	0.140299	0.00461206	0.0379884	More in Healthy
group_4091	0.0176471	0.19403	-0.176383	2.72438e-07	0.000228303	More in Cancer
group_8418	0.2	0.0597015	0.140299	0.00461206	0.0379884	More in Healthy
group_17824	0.0441176	0.164179	-0.120061	0.0010952	0.0162614	More in Cancer
nmlR...merR	0.0911765	0.253731	-0.162555	0.000597158	0.0162614	More in Cancer
group_5236	0.214706	0.0597015	0.155004	0.00191485	0.0224916	More in Healthy
group_2384	0.2	0.0597015	0.140299	0.00461206	0.0379884	More in Healthy
group_13709	0.0617647	0.179104	-0.11734	0.00511847	0.0416259	More in Cancer
group_11225	0.0852941	0.223881	-0.138586	0.00208351	0.0240177	More in Cancer
group_10510	0.0617647	0.179104	-0.11734	0.00511847	0.0416259	More in Cancer
tacF...carB	0.0558824	0.19403	-0.138147	0.000574308	0.0162614	More in Cancer
draG	0.0794118	0.238806	-0.159394	0.000666114	0.0162614	More in Cancer
group_15126	0.152941	0.0298507	0.12309	0.00495522	0.0404005	More in Healthy
group_14173	0.0352941	0.179104	-0.14381	8.38376e-05	0.00577102	More in Cancer
group_9168	0.185294	0.0447761	0.140518	0.00318863	0.0336897	More in Healthy
group_11543	0.194118	0.0298507	0.164267	0.000289876	0.012499	More in Healthy
group_8764	0.0176471	0.119403	-0.101756	0.000482334	0.0162614	More in Cancer
group_7924	0.0441176	0.208955	-0.164838	3.14142e-05	0.00457333	More in Cancer
group_13668	0.0176471	0.119403	-0.101756	0.000482334	0.0162614	More in Cancer
kilA	0.0529412	0.19403	-0.141089	0.000392224	0.0160164	More in Cancer
group_10262	0.0529412	0.19403	-0.141089	0.000392224	0.0160164	More in Cancer
group_8174	0.188235	0.0447761	0.143459	0.00205315	0.0236819	More in Healthy
group_7005	0.188235	0.0447761	0.143459	0.00205315	0.0236819	More in Healthy
group_1966	0.167647	0.0298507	0.137796	0.00195709	0.0228409	More in Healthy
group_15901	0.2	0.0298507	0.170149	0.00028118	0.012383	More in Healthy
group_13592	0.0205882	0.238806	-0.218218	5.4491e-09	1.31282e-05	More in Cancer
group_11166	0.123529	0.0149254	0.108604	0.00431667	0.0359393	More in Healthy
group_10769	0.191176	0.0149254	0.176251	8.1024e-05	0.00563775	More in Healthy
licD...licD2	0.05	0.19403	-0.14403	0.000261908	0.011578	More in Cancer
group_10070	0.0323529	0.164179	-0.131826	0.000175681	0.00874957	More in Cancer
group_9419	0.0382353	0.208955	-0.17072	1.07014e-05	0.00294655	More in Cancer
group_8492	0.182353	0.0447761	0.137577	0.00317339	0.0336897	More in Healthy
group_6393	0.194118	0.0298507	0.164267	0.000289876	0.012499	More in Healthy
group_11662	0.0647059	0.179104	-0.114399	0.00581833	0.0470199	More in Cancer
group_4258	0.194118	0.0447761	0.149342	0.00204213	0.023583	More in Healthy
group_1159	0.194118	0.0447761	0.149342	0.00204213	0.023583	More in Healthy
group_10200	0.05	0.179104	-0.129104	0.000797861	0.0162614	More in Cancer
group_10168	0.05	0.179104	-0.129104	0.000797861	0.0162614	More in Cancer
epsJ...wcaA	0.05	0.179104	-0.129104	0.000797861	0.0162614	More in Cancer
rfaB	0.05	0.179104	-0.129104	0.000797861	0.0162614	More in Cancer
group_4876	0.0323529	0.164179	-0.131826	0.000175681	0.00874957	More in Cancer
mobA	0.0617647	0.208955	-0.147191	0.000409003	0.0162614	More in Cancer
hicA	0.194118	0.0447761	0.149342	0.00204213	0.023583	More in Healthy
group_14343	0.167647	0.0298507	0.137796	0.00195709	0.0228409	More in Healthy
group_13879	0.0235294	0.149254	-0.125724	0.000114821	0.00628727	More in Cancer
group_6284	0.179412	0	0.179412	8.37741e-06	0.00252291	More in Healthy
group_6412	0.179412	0.0149254	0.164486	0.000131506	0.00704068	More in Healthy
cas7e	0.15	0	0.15	7.44641e-05	0.00561796	More in Healthy
cas3	0.15	0	0.15	7.44641e-05	0.00561796	More in Healthy
cas6e	0.15	0	0.15	7.44641e-05	0.00561796	More in Healthy
casA	0.15	0	0.15	7.44641e-05	0.00561796	More in Healthy
casB	0.15	0	0.15	7.44641e-05	0.00561796	More in Healthy
cas5e	0.15	0	0.15	7.44641e-05	0.00561796	More in Healthy
group_16549	0.15	0.0298507	0.120149	0.00490454	0.0400382	More in Healthy
group_13795	0.0147059	0.223881	-0.209175	3.35523e-09	9.23839e-06	More in Cancer
group_11334	0.0823529	0.208955	-0.126602	0.00383207	0.0358048	More in Cancer
group_10820	0.0323529	0.134328	-0.101975	0.00197052	0.0228409	More in Cancer
group_9288	0.167647	0.0149254	0.152722	0.000383357	0.0157881	More in Healthy
group_8350	0.0441176	0.149254	-0.105136	0.00319127	0.0336897	More in Cancer
group_6929	0.0323529	0.134328	-0.101975	0.00197052	0.0228409	More in Cancer
group_1395	0.158824	0.0298507	0.128973	0.00310531	0.0331222	More in Healthy
group_13223	0.167647	0.0298507	0.137796	0.00195709	0.0228409	More in Healthy
group_12909	0.0147059	0.149254	-0.134548	1.20185e-05	0.0030613	More in Cancer
group_9969	0.114706	0	0.114706	0.00101898	0.0162614	More in Healthy
group_9808	0.0264706	0.134328	-0.107858	0.000756744	0.0162614	More in Cancer
group_5127	0.0323529	0.134328	-0.101975	0.00197052	0.0228409	More in Cancer
group_15199	0.147059	0.0149254	0.132133	0.00101205	0.0162614	More in Healthy
group_13996	0.0470588	0.223881	-0.176822	1.46744e-05	0.0031535	More in Cancer
group_8423	0.0294118	0.134328	-0.104917	0.00124834	0.0169201	More in Cancer
group_6268	0.0441176	0.149254	-0.105136	0.00319127	0.0336897	More in Cancer
group_6173	0.167647	0.0298507	0.137796	0.00195709	0.0228409	More in Healthy
group_3951	0.167647	0.0298507	0.137796	0.00195709	0.0228409	More in Healthy
group_721	0.167647	0.0298507	0.137796	0.00195709	0.0228409	More in Healthy
group_14126	0.00294118	0.104478	-0.101536	1.73431e-05	0.0031535	More in Cancer
aliA...sarA	0.0441176	0.179104	-0.134987	0.000353999	0.0148326	More in Cancer
glf	0.00882353	0.134328	-0.125505	7.984e-06	0.0024426	More in Cancer
group_11281	0.0323529	0.134328	-0.101975	0.00197052	0.0228409	More in Cancer
group_7658	0.0176471	0.119403	-0.101756	0.000482334	0.0162614	More in Cancer
group_6589	0.0176471	0.119403	-0.101756	0.000482334	0.0162614	More in Cancer
group_3943	0.0264706	0.149254	-0.122783	0.000210532	0.00961562	More in Cancer
xtgS	0.161765	0	0.161765	4.3604e-05	0.00457333	More in Healthy
group_13862	0.0235294	0.149254	-0.125724	0.000114821	0.00628727	More in Cancer
group_4051	0.147059	0.0149254	0.132133	0.00101205	0.0162614	More in Healthy
group_8868	0.161765	0.0149254	0.146839	0.000375212	0.0155524	More in Healthy
dhaQ	0.0323529	0.164179	-0.131826	0.000175681	0.00874957	More in Cancer
group_7902	0.0176471	0.119403	-0.101756	0.000482334	0.0162614	More in Cancer
cinA	0.0176471	0.119403	-0.101756	0.000482334	0.0162614	More in Cancer
group_15059	0.0617647	0.179104	-0.11734	0.00511847	0.0416259	More in Cancer
group_8153	0.0323529	0.134328	-0.101975	0.00197052	0.0228409	More in Cancer
group_6868	0.0323529	0.164179	-0.131826	0.000175681	0.00874957	More in Cancer
group_16173	0.0676471	0.223881	-0.156234	0.000288422	0.012499	More in Cancer
group_11809	0.0117647	0.119403	-0.107638	0.000105421	0.0059768	More in Cancer
group_683	0.147059	0	0.147059	0.000129811	0.00696932	More in Healthy
group_17227	0.00294118	0.149254	-0.146313	7.71449e-08	7.82574e-05	More in Cancer
group_11600	0.0382353	0.149254	-0.111018	0.00148218	0.0199216	More in Cancer
group_9375	0.0235294	0.134328	-0.110799	0.000435783	0.0162614	More in Cancer
group_8905	0.0235294	0.134328	-0.110799	0.000435783	0.0162614	More in Cancer
group_11358	0.0294118	0.164179	-0.134767	0.000101095	0.0059768	More in Cancer
group_8629	0.0235294	0.134328	-0.110799	0.000435783	0.0162614	More in Cancer
group_10344	0.0647059	0.223881	-0.159175	0.000200453	0.00935814	More in Cancer
yicI	0.0294118	0.134328	-0.104917	0.00124834	0.0169201	More in Cancer
group_13749	0.0264706	0.134328	-0.107858	0.000756744	0.0162614	More in Cancer
group_13463	0.00588235	0.19403	-0.188147	1.82327e-09	5.85696e-06	More in Cancer
group_6947	0.0235294	0.134328	-0.110799	0.000435783	0.0162614	More in Cancer
group_4055	0.138235	0.0149254	0.12331	0.0016718	0.0217144	More in Healthy
group_16073	0.123529	0.0149254	0.108604	0.00431667	0.0359393	More in Healthy
murM...fmhB	0.0294118	0.134328	-0.104917	0.00124834	0.0169201	More in Cancer
group_6218	0.0382353	0.164179	-0.125944	0.000469122	0.0162614	More in Cancer
group_13251	0.0323529	0.134328	-0.101975	0.00197052	0.0228409	More in Cancer
group_11133	0.114706	0	0.114706	0.00101898	0.0162614	More in Healthy
group_14896	0.123529	0	0.123529	0.000617372	0.0162614	More in Healthy
yceG	0.00882353	0.238806	-0.229982	3.65447e-11	3.52182e-07	More in Cancer
group_12513	0.0176471	0.149254	-0.131607	2.7846e-05	0.00447254	More in Cancer
group_11950	0.126471	0.0149254	0.111545	0.00428989	0.0358048	More in Healthy
group_4084	0.135294	0	0.135294	0.000215289	0.00978653	More in Healthy
group_3817	0.135294	0	0.135294	0.000215289	0.00978653	More in Healthy
group_3325	0.123529	0.0149254	0.108604	0.00431667	0.0359393	More in Healthy
group_13653	0.00882353	0.223881	-0.215057	2.30731e-10	1.48237e-06	More in Cancer
group_13471	0.0235294	0.179104	-0.155575	6.82319e-06	0.00220699	More in Cancer
group_12167	0.0558824	0.164179	-0.108297	0.00439909	0.0364994	More in Cancer
group_9454	0.0147059	0.119403	-0.104697	0.000238033	0.01062	More in Cancer
group_3971	0.132353	0	0.132353	0.000376871	0.0155876	More in Healthy
group_12901	0.0205882	0.149254	-0.128665	5.87493e-05	0.00519419	More in Cancer
group_12756	0.0441176	0.149254	-0.105136	0.00319127	0.0336897	More in Cancer
group_9374	0.0235294	0.134328	-0.110799	0.000435783	0.0162614	More in Cancer
group_5199	0.0117647	0.119403	-0.107638	0.000105421	0.0059768	More in Cancer
group_3815	0.129412	0	0.129412	0.000361779	0.0150929	More in Healthy
group_15023	0.0470588	0.179104	-0.132046	0.000538324	0.0162614	More in Cancer
group_14230	0.129412	0.0149254	0.114486	0.00445517	0.0369329	More in Healthy
group_13968	0.0117647	0.119403	-0.107638	0.000105421	0.0059768	More in Cancer
group_10552	0.114706	0	0.114706	0.00101898	0.0162614	More in Healthy
group_3816	0.126471	0	0.126471	0.000370507	0.0153904	More in Healthy
group_14165	0.0441176	0.208955	-0.164838	3.14142e-05	0.00457333	More in Cancer
group_12797	0.120588	0	0.120588	0.000609948	0.0162614	More in Healthy
group_13401	0.00882353	0.119403	-0.110579	4.04628e-05	0.00457333	More in Cancer
group_12956	0.114706	0	0.114706	0.00101898	0.0162614	More in Healthy
group_11769	0.0294118	0.134328	-0.104917	0.00124834	0.0169201	More in Cancer
group_7624	0.117647	0	0.117647	0.00106804	0.0162614	More in Healthy
group_15422	0.05	0.19403	-0.14403	0.000261908	0.011578	More in Cancer
group_12689	0.0205882	0.149254	-0.128665	5.87493e-05	0.00519419	More in Cancer
group_5767	0.00294118	0.119403	-0.116462	2.92601e-06	0.00115094	More in Cancer
yjhB	0.126471	0	0.126471	0.000370507	0.0153904	More in Healthy
group_370	0.0264706	0.134328	-0.107858	0.000756744	0.0162614	More in Cancer
group_15421	0.0617647	0.179104	-0.11734	0.00511847	0.0416259	More in Cancer
group_12979	0.105882	0	0.105882	0.00169457	0.0217144	More in Healthy
group_12009	0.0441176	0.149254	-0.105136	0.00319127	0.0336897	More in Cancer
group_11869	0.0147059	0.119403	-0.104697	0.000238033	0.01062	More in Cancer
group_16029	0.0176471	0.119403	-0.101756	0.000482334	0.0162614	More in Cancer
group_12478	0.0264706	0.149254	-0.122783	0.000210532	0.00961562	More in Cancer
group_10632	0.0235294	0.134328	-0.110799	0.000435783	0.0162614	More in Cancer
group_2252	0.111765	0	0.111765	0.00103485	0.0162614	More in Healthy
group_7639	0.00882353	0.119403	-0.110579	4.04628e-05	0.00457333	More in Cancer
group_7468	0.0147059	0.119403	-0.104697	0.000238033	0.01062	More in Cancer
group_6613	0.00588235	0.119403	-0.113521	1.27064e-05	0.0030613	More in Cancer
group_3455	0.0470588	0.149254	-0.102195	0.00450132	0.0372834	More in Cancer
group_3552	0.0147059	0.119403	-0.104697	0.000238033	0.01062	More in Cancer
group_9235	0.0147059	0.164179	-0.149473	2.52199e-06	0.00103423	More in Cancer
group_8695	0.0147059	0.164179	-0.149473	2.52199e-06	0.00103423	More in Cancer
group_8036	0.00882353	0.119403	-0.110579	4.04628e-05	0.00457333	More in Cancer
group_14457	0.00882353	0.119403	-0.110579	4.04628e-05	0.00457333	More in Cancer
group_13963	0.0470588	0.149254	-0.102195	0.00450132	0.0372834	More in Cancer
group_12193	0.00882353	0.119403	-0.110579	4.04628e-05	0.00457333	More in Cancer
group_11731	0	0.104478	-0.104478	2.49541e-06	0.00103423	More in Cancer
group_8746	0.0117647	0.134328	-0.122564	2.25378e-05	0.00375592	More in Cancer
group_9361	0.0117647	0.119403	-0.107638	0.000105421	0.0059768	More in Cancer
group_15008	0.0323529	0.149254	-0.116901	0.000606188	0.0162614	More in Cancer
group_14972	0.00294118	0.104478	-0.101536	1.73431e-05	0.0031535	More in Cancer
virD4...traG	0.0294118	0.134328	-0.104917	0.00124834	0.0169201	More in Cancer
group_12676	0.00882353	0.179104	-0.170281	4.92863e-08	5.5879e-05	More in Cancer
group_15936	0.0117647	0.134328	-0.122564	2.25378e-05	0.00375592	More in Cancer
group_15935	0.0117647	0.134328	-0.122564	2.25378e-05	0.00375592	More in Cancer
group_13859	0.0147059	0.119403	-0.104697	0.000238033	0.01062	More in Cancer
group_6169	0.0294118	0.134328	-0.104917	0.00124834	0.0169201	More in Cancer
group_6119	0.00588235	0.119403	-0.113521	1.27064e-05	0.0030613	More in Cancer
group_3825	0.0294118	0.134328	-0.104917	0.00124834	0.0169201	More in Cancer
group_695	0.0294118	0.134328	-0.104917	0.00124834	0.0169201	More in Cancer
nemR	0.0294118	0.134328	-0.104917	0.00124834	0.0169201	More in Cancer
rbsD	0.00294118	0.104478	-0.101536	1.73431e-05	0.0031535	More in Cancer
group_17799	0.0205882	0.134328	-0.11374	0.000236177	0.01062	More in Cancer
rbsC	0.00294118	0.104478	-0.101536	1.73431e-05	0.0031535	More in Cancer
group_8775	0.00294118	0.104478	-0.101536	1.73431e-05	0.0031535	More in Cancer
group_5010	0.00294118	0.104478	-0.101536	1.73431e-05	0.0031535	More in Cancer
group_2206	0.00294118	0.104478	-0.101536	1.73431e-05	0.0031535	More in Cancer
rbsK	0.00294118	0.104478	-0.101536	1.73431e-05	0.0031535	More in Cancer
group_13654	0.00588235	0.179104	-0.173222	1.13159e-08	2.42336e-05	More in Cancer
group_8441	0.0117647	0.119403	-0.107638	0.000105421	0.0059768	More in Cancer
group_1578	0.00294118	0.104478	-0.101536	1.73431e-05	0.0031535	More in Cancer
group_11576	0.00882353	0.134328	-0.125505	7.984e-06	0.0024426	More in Cancer
group_3961	0	0.119403	-0.119403	3.74311e-07	0.000275214	More in Cancer
group_16685	0.0117647	0.119403	-0.107638	0.000105421	0.0059768	More in Cancer
group_16681	0.0117647	0.119403	-0.107638	0.000105421	0.0059768	More in Cancer
group_16653	0.0117647	0.119403	-0.107638	0.000105421	0.0059768	More in Cancer
group_9303	0.00294118	0.104478	-0.101536	1.73431e-05	0.0031535	More in Cancer
group_3502	0	0.134328	-0.134328	5.53493e-08	5.92668e-05	More in Cancer
group_17785	0.00588235	0.134328	-0.128446	2.29779e-06	0.00103423	More in Cancer
group_16439	0.00882353	0.119403	-0.110579	4.04628e-05	0.00457333	More in Cancer
group_11010	0.00294118	0.104478	-0.101536	1.73431e-05	0.0031535	More in Cancer
group_2184	0.00588235	0.134328	-0.128446	2.29779e-06	0.00103423	More in Cancer
group_25079	0.00294118	0.104478	-0.101536	1.73431e-05	0.0031535	More in Cancer
group_5916	0.00588235	0.119403	-0.113521	1.27064e-05	0.0030613	More in Cancer
group_5903	0	0.104478	-0.104478	2.49541e-06	0.00103423	More in Cancer
group_9351	0.00294118	0.104478	-0.101536	1.73431e-05	0.0031535	More in Cancer
group_24893	0.00588235	0.119403	-0.113521	1.27064e-05	0.0030613	More in Cancer
group_8605	0	0.104478	-0.104478	2.49541e-06	0.00103423	More in Cancer
group_24826	0	0.104478	-0.104478	2.49541e-06	0.00103423	More in Cancer

## Sheet: gene_volcano_plot
Supplementary Table 2: Differential gene frequency analysis
Gene	Freq_Healthy	Freq_Cancer	Freq_Diff	PValue	AdjPValue
yceG	0.0084507	0.245902	-0.237451	3.5695e-11	3.63625e-07
thiE1~~~thiE	0.0253521	0.245902	-0.22055	2.86863e-08	4.87046e-05
thiM	0.0253521	0.245902	-0.22055	2.86863e-08	4.87046e-05
lacT~~~bglG	0.414085	0.770492	-0.356407	2.80721e-07	0.000343257
lacE~~~celB	0.416901	0.770492	-0.35359	3.03261e-07	0.000343257
lacF	0.416901	0.770492	-0.35359	3.03261e-07	0.000343257
acpA~~~acpB	0.0309859	0.229508	-0.198522	6.50915e-07	0.000663087
pnuC	0.0450704	0.262295	-0.217225	6.89202e-07	0.000668657
aliA	0.0788732	0.327869	-0.248996	8.36428e-07	0.00074093
tnp~~~tra5	0.197183	0.508197	-0.311014	1.1083e-06	0.000836316
glf	0.0084507	0.147541	-0.13909	2.8053e-06	0.00190246
ald	0.977465	0.819672	0.157793	8.49947e-06	0.00303804
tdh	0.149296	0.409836	-0.26054	9.55595e-06	0.0032949
pezT	0.109859	0.344262	-0.234403	1.31196e-05	0.00411228
mefA	0.264789	0.557377	-0.292588	1.65501e-05	0.00475711
yheS~~~msr~~~msrD	0.264789	0.557377	-0.292588	1.65501e-05	0.00475711
ftsQ~~~divIB	0.0450704	0.213115	-0.168044	4.49093e-05	0.00855534
rbsC	0.0028169	0.0983607	-0.0955438	4.95499e-05	0.00855534
rbsD	0.0028169	0.0983607	-0.0955438	4.95499e-05	0.00855534
rbsK	0.0028169	0.0983607	-0.0955438	4.95499e-05	0.00855534
narK	0.4	0.147541	0.252459	8.62119e-05	0.0120513
parB	0.211268	0.459016	-0.247749	8.99787e-05	0.0120607
nisE	0.28169	0.0655738	0.216116	0.000103859	0.0132251
blpY~~~ydiL	0.174648	0.409836	-0.235188	0.000116869	0.0147894
xtgS	0.157746	0	0.157746	0.000136763	0.0170945
aF2118	0.230986	0.47541	-0.244424	0.000143637	0.0176764
nisG	0.278873	0.0655738	0.213299	0.000164775	0.0197478
phtA	0.0056338	0.0983607	-0.0927269	0.000175424	0.0198013
msbA~~~marR	0.571831	0.819672	-0.247841	0.000191302	0.0198013
merR~~~tipA	0.323944	0.0983607	0.225583	0.000196907	0.0198013
group_1016	0.298592	0.0983607	0.200231	0.000868463	0.0325858
group_10168	0.0507042	0.180328	-0.129624	0.00114762	0.0393629
group_10200	0.0507042	0.180328	-0.129624	0.00114762	0.0393629
group_10252	0.121127	0.327869	-0.206742	0.00014342	0.0176764
group_10262	0.0535211	0.196721	-0.1432	0.000522485	0.022278
group_10319	0.0619718	0.213115	-0.151143	0.000473198	0.0205564
group_10322	0.307042	0.0983607	0.208682	0.000536222	0.022278
group_10344	0.0619718	0.213115	-0.151143	0.000473198	0.0205564
group_10393	0	0.0655738	-0.0655738	0.000424296	0.0200571
group_10464	0.0084507	0.0983607	-0.08991	0.00046584	0.0203234
group_10491	0	0.0819672	-0.0819672	5.87012e-05	0.00879396
group_10526	0.31831	0.0983607	0.219949	0.000209171	0.0198013
group_10549	0.0028169	0.0819672	-0.0791503	0.000312216	0.0198013
group_10557	0.0028169	0.0819672	-0.0791503	0.000312216	0.0198013
group_10559	0.0253521	0.131148	-0.105795	0.00113911	0.0393629
group_10585	0.309859	0.0983607	0.211498	0.000342105	0.0198013
group_10589	0.301408	0.0983607	0.203048	0.000553537	0.0226007
group_10632	0.0225352	0.131148	-0.108612	0.000682048	0.0267232
group_10633	0	0.0819672	-0.0819672	5.87012e-05	0.00879396
group_10645	0	0.0655738	-0.0655738	0.000424296	0.0200571
group_10696	0.0112676	0.0983607	-0.0870931	0.00103097	0.0365305
group_10769	0.183099	0.0163934	0.166705	0.000230505	0.0198013
group_10794	0	0.0655738	-0.0655738	0.000424296	0.0200571
group_10830	0.0084507	0.0983607	-0.08991	0.00046584	0.0203234
group_10831	0.312676	0.0983607	0.214315	0.000330107	0.0198013
group_10910	0.0028169	0.0819672	-0.0791503	0.000312216	0.0198013
group_11007	0.0366197	0.213115	-0.176495	9.86498e-06	0.0032949
group_11010	0.0028169	0.0983607	-0.0955438	4.95499e-05	0.00855534
group_11015	0.0028169	0.0819672	-0.0791503	0.000312216	0.0198013
group_11055	0.0112676	0.131148	-0.11988	4.29068e-05	0.00855534
group_11071	0	0.0983607	-0.0983607	7.99822e-06	0.00298799
group_11092	0.0535211	0.262295	-0.208774	3.28884e-06	0.0019432
group_11133	0.121127	0	0.121127	0.00108564	0.038136
group_11136	0.0084507	0.0983607	-0.08991	0.00046584	0.0203234
group_11147	0	0.0655738	-0.0655738	0.000424296	0.0200571
group_11148	0	0.0819672	-0.0819672	5.87012e-05	0.00879396
group_11168	0	0.0655738	-0.0655738	0.000424296	0.0200571
group_11199	0.112676	0.327869	-0.215193	8.72345e-05	0.0120513
group_11203	0.211268	0.0163934	0.194874	4.59795e-05	0.00855534
group_11243	0.0197183	0.131148	-0.111429	0.000385683	0.0200571
group_11358	0.0309859	0.147541	-0.116555	0.000801786	0.0304201
group_11388	0.0028169	0.0819672	-0.0791503	0.000312216	0.0198013
group_11425	0	0.0655738	-0.0655738	0.000424296	0.0200571
group_11426	0	0.0819672	-0.0819672	5.87012e-05	0.00879396
group_11519	0.0450704	0.213115	-0.168044	4.49093e-05	0.00855534
group_11522	0.0028169	0.0819672	-0.0791503	0.000312216	0.0198013
group_11526	0.219718	0.0163934	0.203325	2.64624e-05	0.00707617
group_11540	0.0028169	0.0983607	-0.0955438	4.95499e-05	0.00855534
group_11543	0.185915	0.0163934	0.169522	0.00022811	0.0198013
group_11576	0.0084507	0.131148	-0.122697	1.61725e-05	0.00475711
group_11582	0.456338	0.229508	0.22683	0.00111653	0.0389523
group_11607	0.0056338	0.0819672	-0.0763334	0.000968881	0.0348902
group_11639	0	0.0655738	-0.0655738	0.000424296	0.0200571
group_11666	0.233803	0.0163934	0.217409	8.67838e-06	0.0030485
group_11703	0.307042	0.0983607	0.208682	0.000536222	0.022278
group_11731	0	0.114754	-0.114754	1.07293e-06	0.000836316
group_1174	0.312676	0.0983607	0.214315	0.000330107	0.0198013
group_11809	0.0112676	0.0983607	-0.0870931	0.00103097	0.0365305
group_11826	0	0.0655738	-0.0655738	0.000424296	0.0200571
group_11872	0.202817	0.47541	-0.272593	1.65777e-05	0.00475711
group_11918	0.0732394	0.229508	-0.156269	0.00056591	0.0229222
group_11921	0.0028169	0.0819672	-0.0791503	0.000312216	0.0198013
group_11977	0.0112676	0.114754	-0.103486	0.00021668	0.0198013
group_12004	0.0028169	0.0819672	-0.0791503	0.000312216	0.0198013
group_12163	0.0028169	0.0819672	-0.0791503	0.000312216	0.0198013
group_12193	0.0084507	0.114754	-0.106303	8.90844e-05	0.0120513
group_12195	0.0309859	0.213115	-0.182129	3.00691e-06	0.00190246
group_1227	0.0422535	0.213115	-0.170861	2.79418e-05	0.00707617
group_12277	0	0.0655738	-0.0655738	0.000424296	0.0200571
group_12281	0.0028169	0.0819672	-0.0791503	0.000312216	0.0198013
group_12291	0.0028169	0.0819672	-0.0791503	0.000312216	0.0198013
group_12302	0	0.0655738	-0.0655738	0.000424296	0.0200571
group_12340	0.0028169	0.0819672	-0.0791503	0.000312216	0.0198013
group_12385	0	0.0819672	-0.0819672	5.87012e-05	0.00879396
group_12438	0	0.0655738	-0.0655738	0.000424296	0.0200571
group_12478	0.0253521	0.147541	-0.122189	0.000296868	0.0198013
group_12513	0.0169014	0.131148	-0.114246	0.000203549	0.0198013
group_12524	0	0.0655738	-0.0655738	0.000424296	0.0200571
group_12538	0.0028169	0.0983607	-0.0955438	4.95499e-05	0.00855534
group_12665	0.0591549	0.229508	-0.170353	0.000103247	0.0132251
group_12670	0.290141	0.0655738	0.224567	9.93163e-05	0.012971
group_12674	0.0084507	0.0983607	-0.08991	0.00046584	0.0203234
group_12676	0.0084507	0.180328	-0.171877	7.49393e-08	0.000117447
group_12689	0.0197183	0.163934	-0.144216	1.95069e-05	0.00549793
group_12743	0.292958	0.0655738	0.227384	5.83853e-05	0.00879396
group_12756	0.0422535	0.163934	-0.121681	0.00122905	0.0416652
group_12787	0.605634	0.360656	0.244978	0.000433719	0.0203234
group_12822	0.0140845	0.114754	-0.10067	0.000459963	0.0203234
group_12846	0.0084507	0.0983607	-0.08991	0.00046584	0.0203234
group_1285	0.312676	0.0983607	0.214315	0.000330107	0.0198013
group_12887	0.0028169	0.0819672	-0.0791503	0.000312216	0.0198013
group_12901	0.0197183	0.131148	-0.111429	0.000385683	0.0200571
group_12908	0.0112676	0.114754	-0.103486	0.00021668	0.0198013
group_12909	0.0140845	0.163934	-0.14985	3.8448e-06	0.00206142
group_13002	0.0084507	0.0983607	-0.08991	0.00046584	0.0203234
group_13063	0.0084507	0.0983607	-0.08991	0.00046584	0.0203234
group_1311	0.312676	0.0983607	0.214315	0.000330107	0.0198013
group_13116	0.28169	0.557377	-0.275687	4.59765e-05	0.00855534
group_13118	0.295775	0.0655738	0.230201	5.70829e-05	0.00879396
group_13138	0.292958	0.0655738	0.227384	5.83853e-05	0.00879396
group_13249	0.430986	0.754098	-0.323112	3.08144e-06	0.00190246
group_13251	0.0309859	0.147541	-0.116555	0.000801786	0.0304201
group_13274	0.0028169	0.0819672	-0.0791503	0.000312216	0.0198013
group_13284	0.0028169	0.0819672	-0.0791503	0.000312216	0.0198013
group_13302	0.152113	0.360656	-0.208543	0.000275769	0.0198013
group_13325	0.628169	0.360656	0.267513	0.000121309	0.0152565
group_13364	0.290141	0.0655738	0.224567	9.93163e-05	0.012971
group_13381	0.0084507	0.0983607	-0.08991	0.00046584	0.0203234
group_13400	0.0056338	0.0983607	-0.0927269	0.000175424	0.0198013
group_13401	0.0084507	0.114754	-0.106303	8.90844e-05	0.0120513
group_13463	0.0056338	0.196721	-0.191088	2.61608e-09	1.3325e-05
group_13465	0.0028169	0.0819672	-0.0791503	0.000312216	0.0198013
group_13469	0.267606	0.0819672	0.185638	0.00104738	0.0369832
group_13471	0.0225352	0.180328	-0.157793	8.49947e-06	0.00303804
group_13523	0.619718	0.360656	0.259063	0.000219452	0.0198013
group_13592	0.0197183	0.245902	-0.226183	4.71358e-09	1.60058e-05
group_13593	0.0591549	0.229508	-0.170353	0.000103247	0.0132251
group_13609	0.439437	0.196721	0.242715	0.000351039	0.0200571
group_13610	0.0591549	0.229508	-0.170353	0.000103247	0.0132251
group_13646	0.619718	0.360656	0.259063	0.000219452	0.0198013
group_13653	0.0084507	0.229508	-0.221057	2.53081e-10	1.71876e-06
group_13654	0.0056338	0.180328	-0.174694	1.81139e-08	3.74916e-05
group_13664	0.0056338	0.0983607	-0.0927269	0.000175424	0.0198013
group_13668	0.0169014	0.131148	-0.114246	0.000203549	0.0198013
group_13694	0.619718	0.360656	0.259063	0.000219452	0.0198013
group_1373	0.312676	0.0983607	0.214315	0.000330107	0.0198013
group_13749	0.0253521	0.131148	-0.105795	0.00113911	0.0393629
group_13795	0.0140845	0.229508	-0.215424	3.42954e-09	1.39747e-05
group_13818	0.0422535	0.163934	-0.121681	0.00122905	0.0416652
group_13820	0.619718	0.360656	0.259063	0.000219452	0.0198013
group_13879	0.0225352	0.147541	-0.125006	0.000167854	0.0198013
group_13906	0.329577	0.0163934	0.313184	8.05762e-09	2.05207e-05
group_13907	0.332394	0.0163934	0.316001	7.46243e-09	2.05207e-05
group_13994	0.208451	0.508197	-0.299746	3.77759e-06	0.00206142
group_13996	0.0450704	0.245902	-0.200831	2.91824e-06	0.00190246
group_14	0.0056338	0.0819672	-0.0763334	0.000968881	0.0348902
group_14022	0.433803	0.672131	-0.238328	0.000763989	0.0293689
group_14035	0.126761	0.311475	-0.184715	0.000773231	0.0295569
group_14037	0.594366	0.836066	-0.241699	0.000274384	0.0198013
group_14043	0	0.0655738	-0.0655738	0.000424296	0.0200571
group_14075	0.304225	0.0983607	0.205865	0.000537978	0.022278
group_14077	0.0112676	0.0983607	-0.0870931	0.00103097	0.0365305
group_1408	0	0.0655738	-0.0655738	0.000424296	0.0200571
group_1409	0	0.0655738	-0.0655738	0.000424296	0.0200571
group_14120	0.0140845	0.114754	-0.10067	0.000459963	0.0203234
group_14126	0.0028169	0.114754	-0.111937	7.59184e-06	0.00298799
group_14165	0.0422535	0.229508	-0.187255	7.05864e-06	0.00298799
group_14172	0.0929577	0.262295	-0.169337	0.000770215	0.0294969
group_14173	0.0338028	0.163934	-0.130132	0.000351572	0.0200571
group_14210	0.0591549	0.213115	-0.15396	0.000335788	0.0198013
group_14218	0	0.0655738	-0.0655738	0.000424296	0.0200571
group_14280	0.0084507	0.0983607	-0.08991	0.00046584	0.0203234
group_14379	0.0056338	0.0983607	-0.0927269	0.000175424	0.0198013
group_14411	0.357746	0.590164	-0.232417	0.000967035	0.0348902
group_14436	0.0084507	0.0983607	-0.08991	0.00046584	0.0203234
group_14448	0.0084507	0.0983607	-0.08991	0.00046584	0.0203234
group_14457	0.0084507	0.147541	-0.13909	2.8053e-06	0.00190246
group_14489	0.552113	0.262295	0.289818	2.68318e-05	0.00707617
group_14553	0.0028169	0.0819672	-0.0791503	0.000312216	0.0198013
group_14605	0	0.0819672	-0.0819672	5.87012e-05	0.00879396
group_14606	0.0028169	0.0819672	-0.0791503	0.000312216	0.0198013
group_14638	0.55493	0.803279	-0.248349	0.000215626	0.0198013
group_14641	0.0028169	0.0819672	-0.0791503	0.000312216	0.0198013
group_14673	0.312676	0.0983607	0.214315	0.000330107	0.0198013
group_14830	0	0.0819672	-0.0819672	5.87012e-05	0.00879396
group_14857	0.357746	0.131148	0.226599	0.000324483	0.0198013
group_14884	0	0.0655738	-0.0655738	0.000424296	0.0200571
group_14900	0.95493	0.786885	0.168044	4.49093e-05	0.00855534
group_14946	0.397183	0.672131	-0.274948	7.81532e-05	0.0114031
group_14972	0.0028169	0.0983607	-0.0955438	4.95499e-05	0.00855534
group_14997	0.473239	0.163934	0.309305	4.63965e-06	0.00236297
group_15023	0.0450704	0.196721	-0.151651	0.000162297	0.0196824
group_15191	0.0028169	0.0819672	-0.0791503	0.000312216	0.0198013
group_15205	0.397183	0.163934	0.233249	0.000456622	0.0203234
group_15217	0.0929577	0.262295	-0.169337	0.000770215	0.0294969
group_15226	0.11831	0.52459	-0.40628	9.25435e-12	1.88548e-07
group_15271	0.605634	0.836066	-0.230432	0.000456388	0.0203234
group_15295	0.394366	0.163934	0.230432	0.000456388	0.0203234
group_15296	0.0647887	0.213115	-0.148326	0.000655958	0.0259504
group_15305	0.405634	0.163934	0.241699	0.000274384	0.0198013
group_15320	0.0788732	0.229508	-0.150635	0.00101199	0.0363638
group_15341	0.0056338	0.0983607	-0.0927269	0.000175424	0.0198013
group_15429	0.394366	0.163934	0.230432	0.000456388	0.0203234
group_15448	0.397183	0.163934	0.233249	0.000456622	0.0203234
group_1546	0.312676	0.0983607	0.214315	0.000330107	0.0198013
group_15497	0.256338	0.557377	-0.301039	6.93389e-06	0.00298799
group_15598	0.0056338	0.0983607	-0.0927269	0.000175424	0.0198013
group_15617	0.484507	0.704918	-0.220411	0.00142585	0.0475456
group_15728	0	0.0655738	-0.0655738	0.000424296	0.0200571
group_15737	0.0056338	0.0819672	-0.0763334	0.000968881	0.0348902
group_1578	0.0028169	0.114754	-0.111937	7.59184e-06	0.00298799
group_15843	0	0.0655738	-0.0655738	0.000424296	0.0200571
group_15901	0.197183	0.0327869	0.164396	0.000762216	0.0293561
group_15903	0.0225352	0.131148	-0.108612	0.000682048	0.0267232
group_15935	0.0169014	0.147541	-0.13064	4.41813e-05	0.00855534
group_15936	0.0169014	0.147541	-0.13064	4.41813e-05	0.00855534
group_15959	0.0056338	0.0819672	-0.0763334	0.000968881	0.0348902
group_16029	0.0169014	0.114754	-0.0978527	0.000881492	0.0328929
group_16064	0	0.0655738	-0.0655738	0.000424296	0.0200571
group_16081	0.0028169	0.0819672	-0.0791503	0.000312216	0.0198013
group_16203	0.0084507	0.114754	-0.106303	8.90844e-05	0.0120513
group_16242	0.0028169	0.0819672	-0.0791503	0.000312216	0.0198013
group_16244	0.0028169	0.0819672	-0.0791503	0.000312216	0.0198013
group_16245	0.0028169	0.0819672	-0.0791503	0.000312216	0.0198013
group_16302	0	0.0655738	-0.0655738	0.000424296	0.0200571
group_16344	0.0028169	0.0819672	-0.0791503	0.000312216	0.0198013
group_16348	0.0028169	0.0819672	-0.0791503	0.000312216	0.0198013
group_16410	0.0028169	0.0819672	-0.0791503	0.000312216	0.0198013
group_16411	0.0028169	0.0819672	-0.0791503	0.000312216	0.0198013
group_16412	0.0028169	0.0819672	-0.0791503	0.000312216	0.0198013
group_16428	0.385915	0.622951	-0.237035	0.000691429	0.0270387
group_16435	0.0084507	0.114754	-0.106303	8.90844e-05	0.0120513
group_16439	0.0084507	0.131148	-0.122697	1.61725e-05	0.00475711
group_16440	0.0084507	0.0983607	-0.08991	0.00046584	0.0203234
group_16455	0.0028169	0.0819672	-0.0791503	0.000312216	0.0198013
group_16460	0.0028169	0.0819672	-0.0791503	0.000312216	0.0198013
group_1657	0.312676	0.0983607	0.214315	0.000330107	0.0198013
group_16579	0	0.0655738	-0.0655738	0.000424296	0.0200571
group_16653	0.0112676	0.131148	-0.11988	4.29068e-05	0.00855534
group_16661	0.0112676	0.114754	-0.103486	0.00021668	0.0198013
group_16681	0.0112676	0.131148	-0.11988	4.29068e-05	0.00855534
group_16685	0.0112676	0.131148	-0.11988	4.29068e-05	0.00855534
group_1673	0.312676	0.0983607	0.214315	0.000330107	0.0198013
group_17227	0.0028169	0.147541	-0.144724	1.62857e-07	0.000237004
group_17617	0.0056338	0.0819672	-0.0763334	0.000968881	0.0348902
group_1763	0.312676	0.0983607	0.214315	0.000330107	0.0198013
group_17706	0.312676	0.0983607	0.214315	0.000330107	0.0198013
group_17785	0.0056338	0.131148	-0.125514	4.98713e-06	0.00236297
group_17799	0.0197183	0.131148	-0.111429	0.000385683	0.0200571
group_17865	0.205634	0.0327869	0.172847	0.000464047	0.0203234
group_17960	0.0056338	0.0819672	-0.0763334	0.000968881	0.0348902
group_17982	0.0028169	0.0819672	-0.0791503	0.000312216	0.0198013
group_19082	0	0.0655738	-0.0655738	0.000424296	0.0200571
group_19084	0	0.0655738	-0.0655738	0.000424296	0.0200571
group_19085	0	0.0655738	-0.0655738	0.000424296	0.0200571
group_1972	0	0.0655738	-0.0655738	0.000424296	0.0200571
group_1973	0	0.0655738	-0.0655738	0.000424296	0.0200571
group_2004	0	0.0819672	-0.0819672	5.87012e-05	0.00879396
group_2007	0	0.0655738	-0.0655738	0.000424296	0.0200571
group_2150	0.307042	0.0983607	0.208682	0.000536222	0.022278
group_2184	0.0056338	0.131148	-0.125514	4.98713e-06	0.00236297
group_2206	0.0028169	0.0983607	-0.0955438	4.95499e-05	0.00855534
group_2377	0.0056338	0.0819672	-0.0763334	0.000968881	0.0348902
group_2382	0.304225	0.0983607	0.205865	0.000537978	0.022278
group_2389	0.312676	0.0983607	0.214315	0.000330107	0.0198013
group_2416	0.309859	0.0983607	0.211498	0.000342105	0.0198013
group_2434	0.312676	0.0983607	0.214315	0.000330107	0.0198013
group_24390	0	0.0655738	-0.0655738	0.000424296	0.0200571
group_2450	0.312676	0.0983607	0.214315	0.000330107	0.0198013
group_24789	0	0.0655738	-0.0655738	0.000424296	0.0200571
group_24826	0	0.0819672	-0.0819672	5.87012e-05	0.00879396
group_24837	0	0.0655738	-0.0655738	0.000424296	0.0200571
group_24885	0	0.0819672	-0.0819672	5.87012e-05	0.00879396
group_24891	0	0.0655738	-0.0655738	0.000424296	0.0200571
group_24893	0.0056338	0.131148	-0.125514	4.98713e-06	0.00236297
group_24939	0.0028169	0.0983607	-0.0955438	4.95499e-05	0.00855534
group_24964	0	0.0819672	-0.0819672	5.87012e-05	0.00879396
group_24988	0.0028169	0.0983607	-0.0955438	4.95499e-05	0.00855534
group_24989	0.0056338	0.114754	-0.10912	3.02163e-05	0.00707617
group_24990	0.0056338	0.114754	-0.10912	3.02163e-05	0.00707617
group_24991	0.0056338	0.114754	-0.10912	3.02163e-05	0.00707617
group_24992	0.0056338	0.114754	-0.10912	3.02163e-05	0.00707617
group_24993	0.0056338	0.114754	-0.10912	3.02163e-05	0.00707617
group_24995	0.0225352	0.131148	-0.108612	0.000682048	0.0267232
group_25079	0.0028169	0.0983607	-0.0955438	4.95499e-05	0.00855534
group_264	0.188732	0.0327869	0.155946	0.00123991	0.0418938
group_2722	0.312676	0.0983607	0.214315	0.000330107	0.0198013
group_2723	0.309859	0.0983607	0.211498	0.000342105	0.0198013
group_2833	0.0028169	0.0819672	-0.0791503	0.000312216	0.0198013
group_2851	0.309859	0.0983607	0.211498	0.000342105	0.0198013
group_2873	0.304225	0.0819672	0.222258	0.000144021	0.0176764
group_2974	0.211268	0.0327869	0.178481	0.000283985	0.0198013
group_3029	0	0.0655738	-0.0655738	0.000424296	0.0200571
group_3089	0	0.0655738	-0.0655738	0.000424296	0.0200571
group_3102	0.0056338	0.0819672	-0.0763334	0.000968881	0.0348902
group_3161	0.312676	0.0983607	0.214315	0.000330107	0.0198013
group_3191	0.247887	0.47541	-0.227523	0.000575228	0.0232534
group_3244	0.312676	0.0983607	0.214315	0.000330107	0.0198013
group_3291	0.307042	0.0983607	0.208682	0.000536222	0.022278
group_3409	0.312676	0.0983607	0.214315	0.000330107	0.0198013
group_3468	0.312676	0.0983607	0.214315	0.000330107	0.0198013
group_3502	0	0.147541	-0.147541	1.84017e-08	3.74916e-05
group_3529	0.309859	0.0983607	0.211498	0.000342105	0.0198013
group_3552	0.0140845	0.114754	-0.10067	0.000459963	0.0203234
group_3615	0.312676	0.0983607	0.214315	0.000330107	0.0198013
group_3635	0.312676	0.0983607	0.214315	0.000330107	0.0198013
group_3636	0.205634	0.0327869	0.172847	0.000464047	0.0203234
group_3637	0.307042	0.0983607	0.208682	0.000536222	0.022278
group_3638	0.287324	0.0819672	0.205357	0.000395881	0.0200571
group_3660	0.24507	0.0655738	0.179497	0.00119448	0.0407644
group_370	0.0253521	0.131148	-0.105795	0.00113911	0.0393629
group_3747	0.0084507	0.0983607	-0.08991	0.00046584	0.0203234
group_3778	0.307042	0.0983607	0.208682	0.000536222	0.022278
group_3780	0.312676	0.0983607	0.214315	0.000330107	0.0198013
group_3789	0.309859	0.0983607	0.211498	0.000342105	0.0198013
group_3815	0.123944	0	0.123944	0.0010889	0.0381848
group_3816	0.121127	0	0.121127	0.00108564	0.038136
group_3817	0.129577	0	0.129577	0.000647786	0.0258278
group_3829	0.0169014	0.114754	-0.0978527	0.000881492	0.0328929
group_3844	0.211268	0.42623	-0.214962	0.000598805	0.0240159
group_39	0.0112676	0.0983607	-0.0870931	0.00103097	0.0365305
group_3911	0.312676	0.0983607	0.214315	0.000330107	0.0198013
group_3937	0.256338	0.557377	-0.301039	6.93389e-06	0.00298799
group_3943	0.0253521	0.147541	-0.122189	0.000296868	0.0198013
group_3961	0	0.114754	-0.114754	1.07293e-06	0.000836316
group_3971	0.126761	0	0.126761	0.00114646	0.0393629
group_4012	0.0028169	0.0819672	-0.0791503	0.000312216	0.0198013
group_4056	0.0169014	0.131148	-0.114246	0.000203549	0.0198013
group_4075	0.312676	0.0983607	0.214315	0.000330107	0.0198013
group_4083	0.307042	0.0983607	0.208682	0.000536222	0.022278
group_4084	0.129577	0	0.129577	0.000647786	0.0258278
group_4085	0.312676	0.0983607	0.214315	0.000330107	0.0198013
group_4091	0.0169014	0.196721	-0.17982	3.31022e-07	0.00035496
group_4152	0.312676	0.0983607	0.214315	0.000330107	0.0198013
group_422	0	0.0655738	-0.0655738	0.000424296	0.0200571
group_4270	0.180282	0.377049	-0.196767	0.0010292	0.0365305
group_4288	0.312676	0.0983607	0.214315	0.000330107	0.0198013
group_4320	0.315493	0.0983607	0.217132	0.000326964	0.0198013
group_4411	0.312676	0.0983607	0.214315	0.000330107	0.0198013
group_4487	0	0.0655738	-0.0655738	0.000424296	0.0200571
group_4520	0.214085	0.0491803	0.164904	0.0012735	0.0428158
group_4530	0	0.0655738	-0.0655738	0.000424296	0.0200571
group_4654	0.312676	0.0983607	0.214315	0.000330107	0.0198013
group_4723	0.312676	0.0983607	0.214315	0.000330107	0.0198013
group_4736	0	0.0819672	-0.0819672	5.87012e-05	0.00879396
group_4742	0.312676	0.0983607	0.214315	0.000330107	0.0198013
group_4782	0.298592	0.0983607	0.200231	0.000868463	0.0325858
group_4829	0.312676	0.0983607	0.214315	0.000330107	0.0198013
group_4849	0.312676	0.0983607	0.214315	0.000330107	0.0198013
group_4860	0.0450704	0.213115	-0.168044	4.49093e-05	0.00855534
group_4876	0.0309859	0.163934	-0.132949	0.000216805	0.0198013
group_4891	0.309859	0.0983607	0.211498	0.000342105	0.0198013
group_491	0.180282	0.459016	-0.278735	7.00683e-06	0.00298799
group_4923	0	0.0655738	-0.0655738	0.000424296	0.0200571
group_4925	0.312676	0.0983607	0.214315	0.000330107	0.0198013
group_4928	0	0.0655738	-0.0655738	0.000424296	0.0200571
group_4965	0.23662	0.0491803	0.187439	0.000493754	0.0212679
group_5010	0.0028169	0.0983607	-0.0955438	4.95499e-05	0.00855534
group_5101	0.312676	0.0983607	0.214315	0.000330107	0.0198013
group_5194	0.309859	0.0819672	0.227892	8.89217e-05	0.0120513
group_5195	0.295775	0.0983607	0.197414	0.000866583	0.0325858
group_5199	0.028169	0.147541	-0.119372	0.000498752	0.0214379
group_5306	0.0112676	0.0983607	-0.0870931	0.00103097	0.0365305
group_5332	0.312676	0.114754	0.197922	0.00111237	0.0388739
group_5394	0	0.0655738	-0.0655738	0.000424296	0.0200571
group_5439	0.309859	0.0983607	0.211498	0.000342105	0.0198013
group_5617	0.312676	0.0983607	0.214315	0.000330107	0.0198013
group_5646	0	0.0655738	-0.0655738	0.000424296	0.0200571
group_5651	0.242254	0.0655738	0.17668	0.00118555	0.0405956
group_5730	0.301408	0.0983607	0.203048	0.000553537	0.0226007
group_5745	0.0197183	0.147541	-0.127823	8.93174e-05	0.0120513
group_5767	0.0028169	0.114754	-0.111937	7.59184e-06	0.00298799
group_5889	0.312676	0.0983607	0.214315	0.000330107	0.0198013
group_5897	0.290141	0.0655738	0.224567	9.93163e-05	0.012971
group_5903	0	0.114754	-0.114754	1.07293e-06	0.000836316
group_5916	0.0056338	0.131148	-0.125514	4.98713e-06	0.00236297
group_5981	0.312676	0.0983607	0.214315	0.000330107	0.0198013
group_5995	0.312676	0.0983607	0.214315	0.000330107	0.0198013
group_5997	0.253521	0.0655738	0.187947	0.000740721	0.0285823
group_5998	0.307042	0.0983607	0.208682	0.000536222	0.022278
group_6000	0.312676	0.0983607	0.214315	0.000330107	0.0198013
group_6001	0.312676	0.0983607	0.214315	0.000330107	0.0198013
group_6024	0.307042	0.0655738	0.241468	3.31966e-05	0.00759941
group_6025	0.309859	0.0983607	0.211498	0.000342105	0.0198013
group_6026	0.309859	0.0983607	0.211498	0.000342105	0.0198013
group_6055	0.0056338	0.0819672	-0.0763334	0.000968881	0.0348902
group_6097	0.0140845	0.131148	-0.117063	9.86519e-05	0.012971
group_6113	0.211268	0.42623	-0.214962	0.000598805	0.0240159
group_6114	0.211268	0.42623	-0.214962	0.000598805	0.0240159
group_6119	0.0056338	0.114754	-0.10912	3.02163e-05	0.00707617
group_6140	0.0028169	0.0819672	-0.0791503	0.000312216	0.0198013
group_6151	0	0.0655738	-0.0655738	0.000424296	0.0200571
group_6154	0.312676	0.0983607	0.214315	0.000330107	0.0198013
group_6157	0.278873	0.0655738	0.213299	0.000164775	0.0197478
group_6268	0.0422535	0.163934	-0.121681	0.00122905	0.0416652
group_6284	0.177465	0	0.177465	2.62055e-05	0.00707617
group_6320	0.0028169	0.0819672	-0.0791503	0.000312216	0.0198013
group_6326	0.312676	0.0983607	0.214315	0.000330107	0.0198013
group_6368	0.233803	0.0491803	0.184622	0.000481831	0.0208425
group_6392	0.0253521	0.196721	-0.171369	3.65608e-06	0.00206142
group_6393	0.185915	0.0327869	0.153129	0.00125214	0.0422369
group_6398	0.24507	0.0655738	0.179497	0.00119448	0.0407644
group_6412	0.171831	0.0163934	0.155438	0.000653101	0.0259504
group_6461	0.309859	0.0983607	0.211498	0.000342105	0.0198013
group_6496	0.312676	0.0983607	0.214315	0.000330107	0.0198013
group_6513	0.298592	0.0819672	0.216624	0.000241032	0.0198013
group_6534	0.290141	0.0819672	0.208174	0.000399435	0.0200571
group_6550	0	0.0655738	-0.0655738	0.000424296	0.0200571
group_660	0	0.0655738	-0.0655738	0.000424296	0.0200571
group_6613	0.0056338	0.114754	-0.10912	3.02163e-05	0.00707617
group_6658	0.309859	0.0983607	0.211498	0.000342105	0.0198013
group_6659	0.307042	0.0983607	0.208682	0.000536222	0.022278
group_6675	0.0450704	0.213115	-0.168044	4.49093e-05	0.00855534
group_6677	0	0.0655738	-0.0655738	0.000424296	0.0200571
group_6683	0.312676	0.0983607	0.214315	0.000330107	0.0198013
group_6716	0.284507	0.0819672	0.20254	0.000403463	0.0200571
group_6779	0.290141	0.0983607	0.19178	0.00138896	0.0464675
group_6809	0	0.0655738	-0.0655738	0.000424296	0.0200571
group_683	0.140845	0	0.140845	0.00039052	0.0200571
group_6868	0.0309859	0.163934	-0.132949	0.000216805	0.0198013
group_6937	0.0169014	0.114754	-0.0978527	0.000881492	0.0328929
group_6947	0.0225352	0.131148	-0.108612	0.000682048	0.0267232
group_6949	0.309859	0.0983607	0.211498	0.000342105	0.0198013
group_6952	0.290141	0.0983607	0.19178	0.00138896	0.0464675
group_6980	0.312676	0.0983607	0.214315	0.000330107	0.0198013
group_6985	0.307042	0.0983607	0.208682	0.000536222	0.022278
group_6992	0.0366197	0.213115	-0.176495	9.86498e-06	0.0032949
group_7002	0.312676	0.0983607	0.214315	0.000330107	0.0198013
group_7036	0.143662	0.344262	-0.2006	0.00038237	0.0200571
group_7055	0.0732394	0.229508	-0.156269	0.00056591	0.0229222
group_7061	0.309859	0.0819672	0.227892	8.89217e-05	0.0120513
group_7104	0.0084507	0.0983607	-0.08991	0.00046584	0.0203234
group_7112	0	0.0655738	-0.0655738	0.000424296	0.0200571
group_7128	0.267606	0.0819672	0.185638	0.00104738	0.0369832
group_7133	0.0084507	0.0983607	-0.08991	0.00046584	0.0203234
group_7148	0.0450704	0.180328	-0.135257	0.000552695	0.0226007
group_7224	0.31831	0.0983607	0.219949	0.000209171	0.0198013
group_7357	0	0.0655738	-0.0655738	0.000424296	0.0200571
group_7467	0.0112676	0.0983607	-0.0870931	0.00103097	0.0365305
group_7468	0.0140845	0.114754	-0.10067	0.000459963	0.0203234
group_7478	0.419718	0.180328	0.23939	0.000318428	0.0198013
group_748	0	0.0819672	-0.0819672	5.87012e-05	0.00879396
group_7498	0.312676	0.0983607	0.214315	0.000330107	0.0198013
group_75	0	0.0819672	-0.0819672	5.87012e-05	0.00879396
group_7507	0.250704	0.0655738	0.18513	0.000737586	0.0285695
group_7525	0.304225	0.0983607	0.205865	0.000537978	0.022278
group_7526	0.304225	0.0655738	0.238652	3.30217e-05	0.00759941
group_7527	0.309859	0.0983607	0.211498	0.000342105	0.0198013
group_7528	0.309859	0.0983607	0.211498	0.000342105	0.0198013
group_7605	0.312676	0.0983607	0.214315	0.000330107	0.0198013
group_7614	0.312676	0.0983607	0.214315	0.000330107	0.0198013
group_7651	0.0056338	0.0819672	-0.0763334	0.000968881	0.0348902
group_7652	0.0056338	0.0819672	-0.0763334	0.000968881	0.0348902
group_7665	0.301408	0.0983607	0.203048	0.000553537	0.0226007
group_7672	0.307042	0.0983607	0.208682	0.000536222	0.022278
group_7689	0.301408	0.0983607	0.203048	0.000553537	0.0226007
group_7709	0.0704225	0.295082	-0.224659	3.33817e-06	0.0019432
group_782	0.222535	0.0327869	0.189748	0.000167003	0.0198013
group_7824	0.312676	0.0983607	0.214315	0.000330107	0.0198013
group_7831	0.312676	0.0983607	0.214315	0.000330107	0.0198013
group_7880	0.056338	0.245902	-0.189564	1.96991e-05	0.00549793
group_7924	0.0422535	0.213115	-0.170861	2.79418e-05	0.00707617
group_7987	0.298592	0.0983607	0.200231	0.000868463	0.0325858
group_8006	0.0422535	0.213115	-0.170861	2.79418e-05	0.00707617
group_8036	0.0084507	0.114754	-0.106303	8.90844e-05	0.0120513
group_8156	0.309859	0.0983607	0.211498	0.000342105	0.0198013
group_8211	0.0732394	0.229508	-0.156269	0.00056591	0.0229222
group_8245	0.0450704	0.180328	-0.135257	0.000552695	0.0226007
group_8274	0.0450704	0.229508	-0.184438	1.17533e-05	0.00374159
group_8276	0.0112676	0.0983607	-0.0870931	0.00103097	0.0365305
group_8346	0.0056338	0.0819672	-0.0763334	0.000968881	0.0348902
group_8348	0.0873239	0.327869	-0.240545	2.77851e-06	0.00190246
group_8441	0.0112676	0.114754	-0.103486	0.00021668	0.0198013
group_8506	0.15493	0.409836	-0.254906	1.53888e-05	0.00475048
group_8521	0.425352	0.704918	-0.279566	7.83561e-05	0.0114031
group_8528	0.0028169	0.0819672	-0.0791503	0.000312216	0.0198013
group_8547	0.0028169	0.0819672	-0.0791503	0.000312216	0.0198013
group_8593	0.0056338	0.0819672	-0.0763334	0.000968881	0.0348902
group_8605	0	0.0983607	-0.0983607	7.99822e-06	0.00298799
group_8629	0.0225352	0.131148	-0.108612	0.000682048	0.0267232
group_8687	0	0.0655738	-0.0655738	0.000424296	0.0200571
group_8692	0.31831	0.114754	0.203556	0.000722169	0.0280791
group_8717	0.230986	0.0491803	0.181806	0.00048543	0.0209537
group_8746	0.0112676	0.147541	-0.136273	8.06614e-06	0.00298799
group_8764	0.0197183	0.147541	-0.127823	8.93174e-05	0.0120513
group_8775	0.0028169	0.0983607	-0.0955438	4.95499e-05	0.00855534
group_8856	0.0338028	0.213115	-0.179312	5.55923e-06	0.00257417
group_8858	0.31831	0.114754	0.203556	0.000722169	0.0280791
group_8879	0.0450704	0.229508	-0.184438	1.17533e-05	0.00374159
group_8905	0.0394366	0.163934	-0.124498	0.000833975	0.0315239
group_8935	0	0.0819672	-0.0819672	5.87012e-05	0.00879396
group_8937	0.307042	0.0983607	0.208682	0.000536222	0.022278
group_8948	0.0732394	0.229508	-0.156269	0.00056591	0.0229222
group_8955	0.225352	0.442623	-0.217271	0.000725533	0.0281562
group_8976	0.0253521	0.131148	-0.105795	0.00113911	0.0393629
group_8992	0.0197183	0.196721	-0.177003	7.96992e-07	0.000738087
group_9017	0.0422535	0.213115	-0.170861	2.79418e-05	0.00707617
group_9037	0.208451	0.0327869	0.175664	0.000474587	0.0205729
group_904	0.28169	0.0819672	0.199723	0.000653732	0.0259504
group_9078	0.0450704	0.229508	-0.184438	1.17533e-05	0.00374159
group_9098	0.0647887	0.213115	-0.148326	0.000655958	0.0259504
group_9135	0.425352	0.704918	-0.279566	7.83561e-05	0.0114031
group_9227	0	0.0655738	-0.0655738	0.000424296	0.0200571
group_9303	0.0028169	0.0983607	-0.0955438	4.95499e-05	0.00855534
group_9351	0.0028169	0.0983607	-0.0955438	4.95499e-05	0.00855534
group_9352	0.0704225	0.327869	-0.257446	2.20455e-07	0.000299437
group_9361	0.0112676	0.114754	-0.103486	0.00021668	0.0198013
group_9374	0.0309859	0.163934	-0.132949	0.000216805	0.0198013
group_9375	0.0394366	0.163934	-0.124498	0.000833975	0.0315239
group_9409	0.312676	0.114754	0.197922	0.00111237	0.0388739
group_9419	0.0422535	0.180328	-0.138074	0.000370185	0.0200571
group_9429	0.0450704	0.213115	-0.168044	4.49093e-05	0.00855534
group_9433	0	0.0655738	-0.0655738	0.000424296	0.0200571
group_9445	0.0535211	0.213115	-0.159594	0.000160113	0.0195338
group_9514	0.267606	0.0655738	0.202032	0.000276278	0.0198013
group_9521	0.425352	0.704918	-0.279566	7.83561e-05	0.0114031
group_9541	0.0056338	0.0819672	-0.0763334	0.000968881	0.0348902
group_9545	0.0028169	0.0819672	-0.0791503	0.000312216	0.0198013
group_9551	0.290141	0.0819672	0.208174	0.000399435	0.0200571
group_9581	0	0.0655738	-0.0655738	0.000424296	0.0200571
group_9875	0	0.0983607	-0.0983607	7.99822e-06	0.00298799
hisA	0.447887	0.196721	0.251166	0.000208965	0.0198013
hisB	0.447887	0.196721	0.251166	0.000208965	0.0198013
hisD	0.447887	0.196721	0.251166	0.000208965	0.0198013
hisG	0.447887	0.196721	0.251166	0.000208965	0.0198013
tcyN~~~glnQ	0.622535	0.360656	0.261879	0.000210825	0.0198013
hisH	0.44507	0.196721	0.248349	0.000215626	0.0198013
dhaQ	0.0309859	0.163934	-0.132949	0.000216805	0.0198013
cas3	0.143662	0	0.143662	0.000233635	0.0198013
cas5e	0.143662	0	0.143662	0.000233635	0.0198013
cas6e	0.143662	0	0.143662	0.000233635	0.0198013
cas7e	0.143662	0	0.143662	0.000233635	0.0198013
casA	0.143662	0	0.143662	0.000233635	0.0198013
casB	0.143662	0	0.143662	0.000233635	0.0198013
ytpP~~~trxA	0.6	0.836066	-0.236066	0.000285743	0.0198013
vanW	0.0028169	0.0819672	-0.0791503	0.000312216	0.0198013
macB~~~lolD	0.577465	0.819672	-0.242207	0.000313827	0.0198013
acm	0.312676	0.0983607	0.214315	0.000330107	0.0198013
fasA	0.312676	0.0983607	0.214315	0.000330107	0.0198013
fimA~~~ssaB~~~scaA~~~psaA	0.687324	0.901639	-0.214315	0.000330107	0.0198013
ftf	0.312676	0.0983607	0.214315	0.000330107	0.0198013
hisC	0.312676	0.0983607	0.214315	0.000330107	0.0198013
hisZ	0.312676	0.0983607	0.214315	0.000330107	0.0198013
ideR~~~mntR	0.312676	0.0983607	0.214315	0.000330107	0.0198013
scaB~~~znuB	0.687324	0.901639	-0.214315	0.000330107	0.0198013
scaR~~~mntR~~~ideR~~~marR	0.687324	0.901639	-0.214315	0.000330107	0.0198013
sitB~~~fhuC~~~scaC~~~znuC	0.687324	0.901639	-0.214315	0.000330107	0.0198013
yckB	0.312676	0.0983607	0.214315	0.000330107	0.0198013
yfeB	0.312676	0.0983607	0.214315	0.000330107	0.0198013
moeZ~~~pspE	0.343662	0.590164	-0.246502	0.000334351	0.0198013
mobA	0.0591549	0.213115	-0.15396	0.000335788	0.0198013
bioH	0.309859	0.0983607	0.211498	0.000342105	0.0198013
pdxS	0.309859	0.0983607	0.211498	0.000342105	0.0198013
tkt	0.309859	0.0983607	0.211498	0.000342105	0.0198013
hmuU	0.439437	0.196721	0.242715	0.000351039	0.0200571
hmuV	0.439437	0.196721	0.242715	0.000351039	0.0200571
licD~~~licD2	0.0507042	0.196721	-0.146017	0.000361755	0.0200571
aliA~~~sarA	0.0422535	0.180328	-0.138074	0.000370185	0.0200571
traG~~~herA	0.0197183	0.131148	-0.111429	0.000385683	0.0200571
clcA~~~clcB	0.109859	0.295082	-0.185223	0.000395086	0.0200571
amiA	0.290141	0.0819672	0.208174	0.000399435	0.0200571
atpD	0	0.0655738	-0.0655738	0.000424296	0.0200571
dnaC	0	0.0655738	-0.0655738	0.000424296	0.0200571
nanE1	0	0.0655738	-0.0655738	0.000424296	0.0200571
ntpC	0	0.0655738	-0.0655738	0.000424296	0.0200571
ntpF	0	0.0655738	-0.0655738	0.000424296	0.0200571
rpiR	0	0.0655738	-0.0655738	0.000424296	0.0200571
tetW~~~tet32	0	0.0655738	-0.0655738	0.000424296	0.0200571
tnpW	0	0.0655738	-0.0655738	0.000424296	0.0200571
guaC	0.602817	0.836066	-0.233249	0.000456622	0.0203234
iscS~~~nifS	0.602817	0.836066	-0.233249	0.000456622	0.0203234
malC	0.602817	0.836066	-0.233249	0.000456622	0.0203234
malD	0.602817	0.836066	-0.233249	0.000456622	0.0203234
malG	0.397183	0.163934	0.233249	0.000456622	0.0203234
malX	0.602817	0.836066	-0.233249	0.000456622	0.0203234
phoU~~~nptA	0.602817	0.836066	-0.233249	0.000456622	0.0203234
serA	0.397183	0.163934	0.233249	0.000456622	0.0203234
serC	0.397183	0.163934	0.233249	0.000456622	0.0203234
hicB	0.307042	0.0983607	0.208682	0.000536222	0.022278
pyrR	0.307042	0.0983607	0.208682	0.000536222	0.022278
fabZ	0.301408	0.0983607	0.203048	0.000553537	0.0226007
queF	0.211268	0.42623	-0.214962	0.000598805	0.0240159
znuC~~~drrA	0.749296	0.52459	0.224706	0.000617174	0.0247039
glpG	0.31831	0.114754	0.203556	0.000722169	0.0280791
tacF~~~carB	0.056338	0.196721	-0.140383	0.000739909	0.0285823
rfbB	0.892958	0.721311	0.171646	0.000787234	0.0300358
murM~~~fmhB	0.0309859	0.147541	-0.116555	0.000801786	0.0304201
catE	0.822535	0.622951	0.199584	0.000926983	0.0345272
rfbA	0.890141	0.721311	0.168829	0.000967023	0.0348902
rfbC	0.890141	0.721311	0.168829	0.000967023	0.0348902
phrA	0.0056338	0.0819672	-0.0763334	0.000968881	0.0348902
trpB	0.583099	0.803279	-0.22018	0.000969268	0.0348902
yjhB	0.121127	0	0.121127	0.00108564	0.038136
slc2	0.0253521	0.131148	-0.105795	0.00113911	0.0393629
epsJ~~~wcaA	0.0507042	0.180328	-0.129624	0.00114762	0.0393629
rfaB	0.0507042	0.180328	-0.129624	0.00114762	0.0393629
pgi	0.625352	0.836066	-0.210713	0.00119951	0.0408677
ermB	0.188732	0.0327869	0.155946	0.00123991	0.0418938
nmlR~~~merR	0.0873239	0.245902	-0.158578	0.00126309	0.042536
crcB	0.290141	0.0983607	0.19178	0.00138896	0.0464675
kilA	0.0619718	0.196721	-0.134749	0.00140703	0.0469948

## Sheet: enriched_kegg
Supplementary Table 3: Functional category enrichment (KEGG/COG/functional terms)
category	subcategory	ID	Description	GeneRatio	BgRatio	RichFactor	FoldEnrichment	zScore	pvalue	p.adjust	qvalue	geneID	Count	Group
Metabolism	Nucleotide metabolism	ko00240	Pyrimidine metabolism	15/192	114/14297	0.131579	9.79783	11.0031	3.13581e-11	3.35531e-09	2.04653e-09	K00560/K00609/K02825/K00761/K00943/K00857/K00762/K01591/K00226/K00254/K17828/K00526/K01520/K01956/K01955	15	Sensitive
Metabolism	Global and overview maps	ko01230	Biosynthesis of amino acids	18/192	241/14297	0.0746888	5.56159	8.33231	4.08747e-09	2.18679e-07	1.3338e-07	K14155/K03785/K01735/K00014/K01736/K04517/K00873/K00850/K00948/K01626/K00826/K00600/K01439/K01752/K01586/K01243/K00031/K00651	18	Sensitive
Metabolism	Carbohydrate metabolism	ko00500	Starch and sucrose metabolism	12/192	106/14297	0.113208	8.42983	8.95771	1.78435e-08	6.36416e-07	3.88173e-07	K01193/K01212/K00845/K00847/K00703/K00975/K00700/K02759/K01176/K01223/K05350/K01810	12	Sensitive
Metabolism	Global and overview maps	ko01240	Biosynthesis of cofactors	21/192	380/14297	0.0552632	4.11509	7.1806	4.16474e-08	9.40555e-07	5.73679e-07	K00382/K03800/K21064/K01598/K13038/K00858/K00609/K03151/K20861/K00826/K00600/K00867/K00762/K01591/K00226/K00254/K17828/K00059/K21977/K01956/K01955	21	Sensitive
Metabolism	Glycan biosynthesis and metabolism	ko00550	Peptidoglycan biosynthesis	9/192	55/14297	0.163636	12.1849	9.69619	4.39512e-08	9.40555e-07	5.73679e-07	K01928/K05362/K01000/K05837/K03588/K00887/K06153/K12554/K00075	9	Sensitive
Metabolism	Carbohydrate metabolism	ko00010	Glycolysis / Gluconeogenesis	11/192	107/14297	0.102804	7.65513	8.06174	1.94168e-07	3.46266e-06	2.112e-06	K00627/K00382/K00162/K00161/K00873/K00850/K00845/K00016/K04041/K01223/K01810	11	Sensitive
Metabolism	Global and overview maps	ko01200	Carbon metabolism	19/192	377/14297	0.0503979	3.7528	6.31972	7.81314e-07	1.072e-05	6.53854e-06	K00627/K00382/K00162/K00161/K00873/K00850/K00625/K00948/K00036/K00600/K00845/K01752/K00244/K00033/K00031/K00297/K07404/K01961/K01810	19	Sensitive
Metabolism	Global and overview maps	ko01232	Nucleotide metabolism	11/192	123/14297	0.0894309	6.65934	7.35434	8.01498e-07	1.072e-05	6.53854e-06	K01951/K00560/K02825/K00761/K00943/K00857/K00526/K00759/K01520/K00088/K00364	11	Sensitive
Cellular Processes	Cellular community - prokaryotes	ko02024	Quorum sensing	16/192	283/14297	0.0565371	4.20995	6.3633	1.37215e-06	1.63133e-05	9.95006e-06	K02035/K15580/K01995/K01626/K03110/K01999/K03106/K01997/K01998/K01996/K20488/K14983/K10823/K15583/K15582/K15581	16	Sensitive
Human Diseases	Cancer: overview	ko05230	Central carbon metabolism in cancer	7/192	49/14297	0.142857	10.6376	7.88431	3.76457e-06	4.02809e-05	2.45688e-05	K00162/K00161/K00873/K00850/K00036/K00016/K00031	7	Sensitive
Metabolism	Carbohydrate metabolism	ko00620	Pyruvate metabolism	10/192	133/14297	0.075188	5.59876	6.21649	1.21886e-05	0.000118562	7.23154e-05	K00627/K00382/K00162/K00161/K01069/K00873/K00625/K00244/K00016/K01961	10	Sensitive
Genetic Information Processing	Translation	ko00970	Aminoacyl-tRNA biosynthesis	7/192	66/14297	0.106061	7.89765	6.5528	2.81566e-05	0.000235241	0.000143482	K04567/K01893/K01887/K01874/K01875/K01892/K01867	7	Sensitive
Metabolism	Metabolism of cofactors and vitamins	ko00770	Pantothenate and CoA biosynthesis	6/192	45/14297	0.133333	9.92847	6.99869	2.85807e-05	0.000235241	0.000143482	K01598/K13038/K00997/K00826/K00867/K21977	6	Sensitive
Metabolism	Metabolism of cofactors and vitamins	ko00785	Lipoic acid metabolism	5/192	31/14297	0.16129	12.0102	7.15976	5.3042e-05	0.000405393	0.000247264	K00627/K00382/K00162/K03800/K00161	5	Sensitive
Genetic Information Processing	Translation	ko03010	Ribosome	9/192	143/14297	0.0629371	4.68652	5.16911	0.000133619	0.000953149	0.00058136	K02899/K02888/K02945/K02909/K02884/K02914/K02959/K02867/K02863	9	Sensitive
Metabolism	Carbohydrate metabolism	ko00520	Amino sugar and nucleotide sugar metabolism	8/192	116/14297	0.0689655	5.13542	5.21754	0.000168597	0.00112749	0.000687698	K01443/K00845/K00847/K04042/K00975/K01784/K01810/K00075	8	Sensitive
Metabolism	Carbohydrate metabolism	ko00030	Pentose phosphate pathway	7/192	89/14297	0.0786517	5.85668	5.36216	0.000192167	0.00120952	0.000737732	K00850/K00948/K00036/K00033/K04041/K07404/K01810	7	Sensitive
Metabolism	Carbohydrate metabolism	ko00020	Citrate cycle (TCA cycle)	6/192	70/14297	0.0857143	6.38259	5.2669	0.000348505	0.00207167	0.00126359	K00627/K00382/K00162/K00161/K00244/K00031	6	Sensitive
Metabolism	Amino acid metabolism	ko00400	Phenylalanine, tyrosine and tryptophan biosynthesis	6/192	74/14297	0.0810811	6.03758	5.0689	0.000471056	0.00265279	0.00161803	K03785/K01735/K00014/K01736/K04517/K01626	6	Sensitive
Metabolism	Xenobiotics biodegradation and metabolism	ko00983	Drug metabolism	4/192	32/14297	0.125	9.30794	5.48914	0.000844551	0.00451835	0.0027559	K01951/K00857/K01520/K00088	4	Sensitive
Organismal Systems	Endocrine system	ko04922	Glucagon signaling pathway	5/192	57/14297	0.0877193	6.53189	4.88233	0.000985861	0.00502319	0.00306383	K00162/K00161/K00873/K00850/K00016	5	Sensitive
Metabolism	Amino acid metabolism	ko00270	Cysteine and methionine metabolism	7/192	128/14297	0.0546875	4.07222	4.07343	0.00170146	0.00827528	0.00504739	K14155/K00826/K01752/K00016/K01243/K00547/K00651	7	Sensitive
Metabolism	Metabolism of cofactors and vitamins	ko00670	One carbon pool by folate	5/192	65/14297	0.0769231	5.72796	4.45727	0.00178392	0.00829909	0.00506191	K00382/K00560/K00600/K00297/K00547	5	Sensitive
Genetic Information Processing	Replication and repair	ko03440	Homologous recombination	5/192	72/14297	0.0694444	5.17108	4.13961	0.00280239	0.0120396	0.0073434	K03584/K03581/K03111/K02340/K03629	5	Sensitive
Genetic Information Processing	Replication and repair	ko03430	Mismatch repair	4/192	44/14297	0.0909091	6.76941	4.47174	0.002813	0.0120396	0.0073434	K06223/K07456/K03111/K02340	4	Sensitive
NA	NA	ko04981	Folate transport and metabolism	3/192	24/14297	0.125	9.30794	4.7524	0.00392039	0.0154486	0.00942269	K00560/K00600/K00547	3	Sensitive
Genetic Information Processing	Folding, sorting and degradation	ko03060	Protein export	4/192	49/14297	0.0816327	6.07866	4.15472	0.00416806	0.0154486	0.00942269	K03101/K03110/K03106/K03100	4	Sensitive
Metabolism	Global and overview maps	ko01210	2-Oxocarboxylic acid metabolism	6/192	113/14297	0.0530973	3.95382	3.67786	0.00417979	0.0154486	0.00942269	K00627/K00382/K00162/K00161/K00826/K00031	6	Sensitive
Metabolism	Carbohydrate metabolism	ko00052	Galactose metabolism	5/192	79/14297	0.0632911	4.71288	3.8608	0.00418702	0.0154486	0.00942269	K00850/K01193/K00845/K01784/K01220	5	Sensitive
Genetic Information Processing	Replication and repair	ko03410	Base excision repair	4/192	53/14297	0.0754717	5.61989	3.9312	0.00552633	0.0197106	0.0120222	K10773/K03575/K01246/K10563	4	Sensitive
Genetic Information Processing	Replication and repair	ko03030	DNA replication	4/192	60/14297	0.0666667	4.96424	3.59002	0.00855976	0.029545	0.0180206	K03470/K03471/K03111/K02340	4	Sensitive
Metabolism	Metabolism of other amino acids	ko00450	Selenocompound metabolism	3/192	36/14297	0.0833333	6.2053	3.64832	0.0122957	0.0411138	0.0250768	K14155/K01874/K11717	3	Sensitive
Metabolism	Amino acid metabolism	ko00250	Alanine, aspartate and glutamate metabolism	4/192	70/14297	0.0571429	4.25506	3.1851	0.0145184	0.0470747	0.0287126	K00609/K00262/K01956/K01955	4	Sensitive
Environmental Information Processing	Membrane transport	ko02060	Phosphotransferase system (PTS)	2025-12-03	72/14297	0.0416667	49.6424	11.9926	2.60797e-05	0.000286876	0.000164714	K02783/K02782/K02781	3	Resistant
Cellular Processes	Cellular community - prokaryotes	ko02024	Quorum sensing	2025-12-04	283/14297	0.0141343	16.8398	7.80046	6.56359e-05	0.000360997	0.000207271	K20344/K12292/K07707/K12295	4	Resistant
Metabolism	Carbohydrate metabolism	ko00051	Fructose and mannose metabolism	2025-12-03	115/14297	0.026087	31.0804	9.3869	0.000105792	0.000387905	0.000222721	K02783/K02782/K02781	3	Resistant
Metabolism	Global and overview maps	ko01230	Biosynthesis of amino acids	2025-12-02	241/14297	0.00829876	9.88728	4.03278	0.0167084	0.0459481	0.0263817	K00948/K01914	2	Resistant

## Sheet: Go_enriched
Supplementary Table 4: Gene Ontology (GO) enrichment
GOs	Terms	Ontology	fisher_p	padj	EnrichedIn	FoldEnrichment
GO:0015144	carbohydrate transmembrane transporter activity	MF	0.00906456	1	Cancer	6
GO:0034219	carbohydrate transmembrane transport	BP	0.00906456	1	Cancer	6
GO:0015145	monosaccharide transmembrane transporter activity	MF	0.0595279	1	Cancer	4
GO:0015749	monosaccharide transmembrane transport	BP	0.0595279	1	Cancer	4
GO:0043211	ABC-type carbohydrate transporter activity	MF	0.0595279	1	Cancer	4
GO:0051119	sugar transmembrane transporter activity	MF	0.0595279	1	Cancer	4
GO:0008643	carbohydrate transport	BP	0.0164777	1	Cancer	3.5
GO:0004553	hydrolase activity, hydrolyzing O-glycosyl compounds	MF	0.152493	1	Cancer	3
GO:0005363	maltose transmembrane transporter activity	MF	0.152493	1	Cancer	3
GO:0006090	pyruvate metabolic process	BP	0.152493	1	Cancer	3
GO:0006772	thiamine metabolic process	BP	0.152493	1	Cancer	3
GO:0008422	beta-glucosidase activity	MF	0.152493	1	Cancer	3
GO:0009166	nucleotide catabolic process	BP	0.152493	1	Cancer	3
GO:0009228	thiamine biosynthetic process	BP	0.152493	1	Cancer	3
GO:0015154	disaccharide transmembrane transporter activity	MF	0.152493	1	Cancer	3
GO:0015157	oligosaccharide transmembrane transporter activity	MF	0.152493	1	Cancer	3
GO:0015422	ABC-type oligosaccharide transporter activity	MF	0.152493	1	Cancer	3
GO:0015423	ABC-type maltose transporter activity	MF	0.152493	1	Cancer	3
GO:0015766	disaccharide transport	BP	0.152493	1	Cancer	3
GO:0015768	maltose transport	BP	0.152493	1	Cancer	3
GO:0015772	oligosaccharide transport	BP	0.152493	1	Cancer	3
GO:0015926	glucosidase activity	MF	0.152493	1	Cancer	3
GO:0016051	carbohydrate biosynthetic process	BP	0.152493	1	Cancer	3
GO:0016798	hydrolase activity, acting on glycosyl bonds	MF	0.152493	1	Cancer	3
GO:0042723	thiamine-containing compound metabolic process	BP	0.152493	1	Cancer	3
GO:0042724	thiamine-containing compound biosynthetic process	BP	0.152493	1	Cancer	3
GO:0071496	cellular response to external stimulus	BP	0.152493	1	Cancer	3
GO:1901136	carbohydrate derivative catabolic process	BP	0.152493	1	Cancer	3
GO:1901292	nucleoside phosphate catabolic process	BP	0.152493	1	Cancer	3
GO:0006790	sulfur compound metabolic process	BP	0.0799015	1	Cancer	2.5
GO:0000035	acyl binding	MF	0.390551	1	Cancer	2
GO:0000036	acyl carrier activity	MF	0.390551	1	Cancer	2
GO:0000413	protein peptidyl-prolyl isomerization	BP	0.390551	1	Cancer	2
GO:0003755	peptidyl-prolyl cis-trans isomerase activity	MF	0.390551	1	Cancer	2
GO:0004347	glucose-6-phosphate isomerase activity	MF	0.390551	1	Cancer	2
GO:0004470	malic enzyme activity	MF	0.390551	1	Cancer	2
GO:0004789	thiamine-phosphate diphosphorylase activity	MF	0.390551	1	Cancer	2
GO:0005996	monosaccharide metabolic process	BP	0.390551	1	Cancer	2
GO:0006006	glucose metabolic process	BP	0.390551	1	Cancer	2
GO:0006094	gluconeogenesis	BP	0.390551	1	Cancer	2
GO:0006096	glycolytic process	BP	0.390551	1	Cancer	2
GO:0006108	malate metabolic process	BP	0.390551	1	Cancer	2
GO:0006113	fermentation	BP	0.390551	1	Cancer	2
GO:0006195	purine nucleotide catabolic process	BP	0.390551	1	Cancer	2
GO:0006203	dGTP catabolic process	BP	0.390551	1	Cancer	2
GO:0006605	protein targeting	BP	0.390551	1	Cancer	2
GO:0006612	protein targeting to membrane	BP	0.390551	1	Cancer	2
GO:0006613	cotranslational protein targeting to membrane	BP	0.390551	1	Cancer	2
GO:0006614	SRP-dependent cotranslational protein targeting to membrane	BP	0.390551	1	Cancer	2
GO:0006616	SRP-dependent cotranslational protein targeting to membrane, translocation	BP	0.390551	1	Cancer	2
GO:0006633	fatty acid biosynthetic process	BP	0.390551	1	Cancer	2
GO:0006643	membrane lipid metabolic process	BP	0.390551	1	Cancer	2
GO:0006664	glycolipid metabolic process	BP	0.390551	1	Cancer	2
GO:0008832	dGTPase activity	MF	0.390551	1	Cancer	2
GO:0008972	phosphomethylpyrimidine kinase activity	MF	0.390551	1	Cancer	2
GO:0009135	purine nucleoside diphosphate metabolic process	BP	0.390551	1	Cancer	2
GO:0009143	nucleoside triphosphate catabolic process	BP	0.390551	1	Cancer	2
GO:0009146	purine nucleoside triphosphate catabolic process	BP	0.390551	1	Cancer	2
GO:0009151	purine deoxyribonucleotide metabolic process	BP	0.390551	1	Cancer	2
GO:0009155	purine deoxyribonucleotide catabolic process	BP	0.390551	1	Cancer	2
GO:0009179	purine ribonucleoside diphosphate metabolic process	BP	0.390551	1	Cancer	2
GO:0009185	ribonucleoside diphosphate metabolic process	BP	0.390551	1	Cancer	2
GO:0009204	deoxyribonucleoside triphosphate catabolic process	BP	0.390551	1	Cancer	2
GO:0009215	purine deoxyribonucleoside triphosphate metabolic process	BP	0.390551	1	Cancer	2
GO:0009217	purine deoxyribonucleoside triphosphate catabolic process	BP	0.390551	1	Cancer	2
GO:0009245	lipid A biosynthetic process	BP	0.390551	1	Cancer	2
GO:0009247	glycolipid biosynthetic process	BP	0.390551	1	Cancer	2
GO:0009264	deoxyribonucleotide catabolic process	BP	0.390551	1	Cancer	2
GO:0009292	horizontal gene transfer	BP	0.390551	1	Cancer	2
GO:0009294	DNA-mediated transformation	BP	0.390551	1	Cancer	2
GO:0009311	oligosaccharide metabolic process	BP	0.390551	1	Cancer	2
GO:0009312	oligosaccharide biosynthetic process	BP	0.390551	1	Cancer	2
GO:0009432	SOS response	BP	0.390551	1	Cancer	2
GO:0010181	FMN binding	MF	0.390551	1	Cancer	2
GO:0015146	pentose transmembrane transporter activity	MF	0.390551	1	Cancer	2
GO:0015407	ABC-type monosaccharide transporter activity	MF	0.390551	1	Cancer	2
GO:0015591	D-ribose transmembrane transporter activity	MF	0.390551	1	Cancer	2
GO:0015608	carbohydrate-importing ABC transporter activity	MF	0.390551	1	Cancer	2
GO:0015611	ABC-type D-ribose transporter activity	MF	0.390551	1	Cancer	2
GO:0015750	pentose transmembrane transport	BP	0.390551	1	Cancer	2
GO:0015752	D-ribose transmembrane transport	BP	0.390551	1	Cancer	2
GO:0015774	polysaccharide transport	BP	0.390551	1	Cancer	2
GO:0016054	organic acid catabolic process	BP	0.390551	1	Cancer	2
GO:0016615	malate dehydrogenase activity	MF	0.390551	1	Cancer	2
GO:0016793	triphosphoric monoester hydrolase activity	MF	0.390551	1	Cancer	2
GO:0016832	aldehyde-lyase activity	MF	0.390551	1	Cancer	2
GO:0016859	cis-trans isomerase activity	MF	0.390551	1	Cancer	2
GO:0017057	6-phosphogluconolactonase activity	MF	0.390551	1	Cancer	2
GO:0018208	peptidyl-proline modification	BP	0.390551	1	Cancer	2
GO:0019318	hexose metabolic process	BP	0.390551	1	Cancer	2
GO:0019319	hexose biosynthetic process	BP	0.390551	1	Cancer	2
GO:0030420	establishment of competence for transformation	BP	0.390551	1	Cancer	2
GO:0031177	phosphopantetheine binding	MF	0.390551	1	Cancer	2
GO:0032978	protein insertion into membrane from inner side	BP	0.390551	1	Cancer	2
GO:0033037	polysaccharide localization	BP	0.390551	1	Cancer	2
GO:0033218	amide binding	MF	0.390551	1	Cancer	2
GO:0033365	protein localization to organelle	BP	0.390551	1	Cancer	2
GO:0034655	nucleobase-containing compound catabolic process	BP	0.306293	1	Cancer	2
GO:0042866	pyruvate biosynthetic process	BP	0.390551	1	Cancer	2
GO:0042956	maltodextrin transmembrane transport	BP	0.390551	1	Cancer	2
GO:0043086	negative regulation of catalytic activity	BP	0.390551	1	Cancer	2
GO:0043190	ATP-binding cassette (ABC) transporter complex	CC	0.390551	1	Cancer	2
GO:0043464	malolactic fermentation	BP	0.390551	1	Cancer	2
GO:0044092	negative regulation of molecular function	BP	0.390551	1	Cancer	2
GO:0044272	sulfur compound biosynthetic process	BP	0.306293	1	Cancer	2
GO:0044273	sulfur compound catabolic process	BP	0.390551	1	Cancer	2
GO:0044620	ACP phosphopantetheine attachment site binding	MF	0.390551	1	Cancer	2
GO:0045047	protein targeting to ER	BP	0.390551	1	Cancer	2
GO:0046031	ADP metabolic process	BP	0.390551	1	Cancer	2
GO:0046070	dGTP metabolic process	BP	0.390551	1	Cancer	2
GO:0046364	monosaccharide biosynthetic process	BP	0.390551	1	Cancer	2
GO:0046386	deoxyribose phosphate catabolic process	BP	0.390551	1	Cancer	2
GO:0046467	membrane lipid biosynthetic process	BP	0.390551	1	Cancer	2
GO:0046493	lipid A metabolic process	BP	0.390551	1	Cancer	2
GO:0051192	prosthetic group binding	MF	0.390551	1	Cancer	2
GO:0051205	protein insertion into membrane	BP	0.390551	1	Cancer	2
GO:0052689	carboxylic ester hydrolase activity	MF	0.390551	1	Cancer	2
GO:0061024	membrane organization	BP	0.390551	1	Cancer	2
GO:0061595	6-deoxy-6-sulfofructose-1-phosphate aldolase activity	MF	0.390551	1	Cancer	2
GO:0070972	protein localization to endoplasmic reticulum	BP	0.390551	1	Cancer	2
GO:0072341	modified amino acid binding	MF	0.390551	1	Cancer	2
GO:0072523	purine-containing compound catabolic process	BP	0.390551	1	Cancer	2
GO:0072594	establishment of protein localization to organelle	BP	0.390551	1	Cancer	2
GO:0072599	establishment of protein localization to endoplasmic reticulum	BP	0.390551	1	Cancer	2
GO:0072657	protein localization to membrane	BP	0.390551	1	Cancer	2
GO:0090150	establishment of protein localization to membrane	BP	0.390551	1	Cancer	2
GO:0098533	ATPase dependent transmembrane transport complex	CC	0.390551	1	Cancer	2
GO:0140104	molecular carrier activity	MF	0.390551	1	Cancer	2
GO:1901269	lipooligosaccharide metabolic process	BP	0.390551	1	Cancer	2
GO:1901271	lipooligosaccharide biosynthetic process	BP	0.390551	1	Cancer	2
GO:1902495	transmembrane transporter complex	CC	0.390551	1	Cancer	2
GO:1902776	6-sulfoquinovose(1-) metabolic process	BP	0.390551	1	Cancer	2
GO:1902777	6-sulfoquinovose(1-) catabolic process	BP	0.390551	1	Cancer	2
GO:1903509	liposaccharide metabolic process	BP	0.390551	1	Cancer	2
GO:1904949	ATPase complex	CC	0.390551	1	Cancer	2
GO:1990060	maltose transport complex	CC	0.390551	1	Cancer	2
GO:1990351	transporter complex	CC	0.390551	1	Cancer	2
GO:0003677	DNA binding	MF	0.217455	1	Cancer	1.66667
GO:0009144	purine nucleoside triphosphate metabolic process	BP	0.217455	1	Cancer	1.66667
GO:0044248	cellular catabolic process	BP	0.217455	1	Cancer	1.66667
GO:0001067	transcription regulatory region nucleic acid binding	MF	0.564724	1	Cancer	1.5
GO:0003688	DNA replication origin binding	MF	0.564724	1	Cancer	1.5
GO:0009132	nucleoside diphosphate metabolic process	BP	0.564724	1	Cancer	1.5
GO:0009141	nucleoside triphosphate metabolic process	BP	0.275701	1	Cancer	1.5
GO:0009200	deoxyribonucleoside triphosphate metabolic process	BP	0.564724	1	Cancer	1.5
GO:0009262	deoxyribonucleotide metabolic process	BP	0.564724	1	Cancer	1.5
GO:0009394	2'-deoxyribonucleotide metabolic process	BP	0.564724	1	Cancer	1.5
GO:0019359	nicotinamide nucleotide biosynthetic process	BP	0.564724	1	Cancer	1.5
GO:0019362	pyridine nucleotide metabolic process	BP	0.564724	1	Cancer	1.5
GO:0019363	pyridine nucleotide biosynthetic process	BP	0.564724	1	Cancer	1.5
GO:0019692	deoxyribose phosphate metabolic process	BP	0.564724	1	Cancer	1.5
GO:0019899	enzyme binding	MF	0.564724	1	Cancer	1.5
GO:0034404	nucleobase-containing small molecule biosynthetic process	BP	0.564724	1	Cancer	1.5
GO:0042626	ATPase-coupled transmembrane transporter activity	MF	0.275701	1	Cancer	1.5
GO:0046434	organophosphate catabolic process	BP	0.564724	1	Cancer	1.5
GO:0046496	nicotinamide nucleotide metabolic process	BP	0.564724	1	Cancer	1.5
GO:0051287	NAD binding	MF	0.564724	1	Cancer	1.5
GO:0072330	monocarboxylic acid biosynthetic process	BP	0.564724	1	Cancer	1.5
GO:0005975	carbohydrate metabolic process	BP	0.202937	1	Cancer	1.4
GO:0003690	double-stranded DNA binding	MF	0.385183	1	Cancer	1.33333
GO:0006754	ATP biosynthetic process	BP	0.385183	1	Cancer	1.33333
GO:0009124	nucleoside monophosphate biosynthetic process	BP	0.385183	1	Cancer	1.33333
GO:0009126	purine nucleoside monophosphate metabolic process	BP	0.385183	1	Cancer	1.33333
GO:0009127	purine nucleoside monophosphate biosynthetic process	BP	0.385183	1	Cancer	1.33333
GO:0009145	purine nucleoside triphosphate biosynthetic process	BP	0.385183	1	Cancer	1.33333
GO:0009156	ribonucleoside monophosphate biosynthetic process	BP	0.385183	1	Cancer	1.33333
GO:0009161	ribonucleoside monophosphate metabolic process	BP	0.385183	1	Cancer	1.33333
GO:0009167	purine ribonucleoside monophosphate metabolic process	BP	0.385183	1	Cancer	1.33333
GO:0009168	purine ribonucleoside monophosphate biosynthetic process	BP	0.385183	1	Cancer	1.33333
GO:0009199	ribonucleoside triphosphate metabolic process	BP	0.385183	1	Cancer	1.33333
GO:0009201	ribonucleoside triphosphate biosynthetic process	BP	0.385183	1	Cancer	1.33333
GO:0009205	purine ribonucleoside triphosphate metabolic process	BP	0.385183	1	Cancer	1.33333
GO:0009206	purine ribonucleoside triphosphate biosynthetic process	BP	0.385183	1	Cancer	1.33333
GO:0009605	response to external stimulus	BP	0.385183	1	Cancer	1.33333
GO:0016776	phosphotransferase activity, phosphate group as acceptor	MF	0.385183	1	Cancer	1.33333
GO:0016830	carbon-carbon lyase activity	MF	0.385183	1	Cancer	1.33333
GO:0019200	carbohydrate kinase activity	MF	0.385183	1	Cancer	1.33333
GO:0043565	sequence-specific DNA binding	MF	0.385183	1	Cancer	1.33333
GO:0046034	ATP metabolic process	BP	0.385183	1	Cancer	1.33333
GO:0046835	carbohydrate phosphorylation	BP	0.385183	1	Cancer	1.33333
GO:0072527	pyrimidine-containing compound metabolic process	BP	0.385183	1	Cancer	1.33333
GO:0072528	pyrimidine-containing compound biosynthetic process	BP	0.385183	1	Cancer	1.33333
GO:1901657	glycosyl compound metabolic process	BP	0.385183	1	Cancer	1.33333
GO:1990837	sequence-specific double-stranded DNA binding	MF	0.385183	1	Cancer	1.33333
GO:0009056	catabolic process	BP	0.442806	1	Cancer	1.25
GO:0009123	nucleoside monophosphate metabolic process	BP	0.442806	1	Cancer	1.25
GO:0009142	nucleoside triphosphate biosynthetic process	BP	0.442806	1	Cancer	1.25
GO:1901135	carbohydrate derivative metabolic process	BP	0.0999738	1	Cancer	1.25
GO:0015399	primary active transmembrane transporter activity	MF	0.325355	1	Cancer	1.2
GO:0006163	purine nucleotide metabolic process	BP	0.357664	1	Cancer	1.16667
GO:0022804	active transmembrane transporter activity	MF	0.357664	1	Cancer	1.16667
GO:0072521	purine-containing compound metabolic process	BP	0.393829	1	Cancer	1.14286
GO:0000096	sulfur amino acid metabolic process	BP	1	1	Equal	1
GO:0000097	sulfur amino acid biosynthetic process	BP	1	1	Equal	1
GO:0000278	mitotic cell cycle	BP	1	1	Equal	1
GO:0000281	mitotic cytokinesis	BP	1	1	Equal	1
GO:0000451	rRNA 2'-O-methylation	BP	1	1	Equal	1
GO:0000731	DNA synthesis involved in DNA repair	BP	1	1	Equal	1
GO:0000910	cytokinesis	BP	0.646311	1	Equal	1
GO:0000917	division septum assembly	BP	1	1	Equal	1
GO:0000918	division septum site selection	BP	1	1	Equal	1
GO:0000921	septin ring assembly	BP	1	1	Equal	1
GO:0000976	transcription cis-regulatory region binding	MF	1	1	Equal	1
GO:0001216	DNA-binding transcription activator activity	MF	1	1	Equal	1
GO:0001217	DNA-binding transcription repressor activity	MF	1	1	Equal	1
GO:0002181	cytoplasmic translation	BP	1	1	Equal	1
GO:0002184	cytoplasmic translational termination	BP	1	1	Equal	1
GO:0003676	nucleic acid binding	MF	0.526112	1	Equal	1
GO:0003700	DNA-binding transcription factor activity	MF	1	1	Equal	1
GO:0003735	structural constituent of ribosome	MF	0.719348	1	Equal	1
GO:0003924	GTPase activity	MF	0.646311	1	Equal	1
GO:0003951	NAD+ kinase activity	MF	1	1	Equal	1
GO:0003999	adenine phosphoribosyltransferase activity	MF	1	1	Equal	1
GO:0004016	adenylate cyclase activity	MF	1	1	Equal	1
GO:0004340	glucokinase activity	MF	1	1	Equal	1
GO:0004360	glutamine-fructose-6-phosphate transaminase (isomerizing) activity	MF	1	1	Equal	1
GO:0004396	hexokinase activity	MF	1	1	Equal	1
GO:0004413	homoserine kinase activity	MF	1	1	Equal	1
GO:0004521	RNA endonuclease activity	MF	0.684231	1	Equal	1
GO:0004523	RNA-DNA hybrid ribonuclease activity	MF	1	1	Equal	1
GO:0004526	ribonuclease P activity	MF	1	1	Equal	1
GO:0004540	RNA nuclease activity	MF	0.684231	1	Equal	1
GO:0004549	tRNA-specific ribonuclease activity	MF	1	1	Equal	1
GO:0004594	pantothenate kinase activity	MF	1	1	Equal	1
GO:0004611	phosphoenolpyruvate carboxykinase activity	MF	1	1	Equal	1
GO:0004791	thioredoxin-disulfide reductase (NADPH) activity	MF	1	1	Equal	1
GO:0004798	thymidylate kinase activity	MF	1	1	Equal	1
GO:0005198	structural molecule activity	MF	0.719348	1	Equal	1
GO:0005840	ribosome	CC	0.684231	1	Equal	1
GO:0006002	fructose 6-phosphate metabolic process	BP	1	1	Equal	1
GO:0006040	amino sugar metabolic process	BP	0.646311	1	Equal	1
GO:0006047	UDP-N-acetylglucosamine metabolic process	BP	1	1	Equal	1
GO:0006091	generation of precursor metabolites and energy	BP	0.646311	1	Equal	1
GO:0006144	purine nucleobase metabolic process	BP	1	1	Equal	1
GO:0006164	purine nucleotide biosynthetic process	BP	0.719348	1	Equal	1
GO:0006168	adenine salvage	BP	1	1	Equal	1
GO:0006227	dUDP biosynthetic process	BP	1	1	Equal	1
GO:0006233	dTDP biosynthetic process	BP	1	1	Equal	1
GO:0006235	dTTP biosynthetic process	BP	1	1	Equal	1
GO:0006260	DNA replication	BP	0.719348	1	Equal	1
GO:0006261	DNA-templated DNA replication	BP	0.719348	1	Equal	1
GO:0006268	DNA unwinding involved in DNA replication	BP	1	1	Equal	1
GO:0006270	DNA replication initiation	BP	0.646311	1	Equal	1
GO:0006271	DNA strand elongation involved in DNA replication	BP	1	1	Equal	1
GO:0006273	lagging strand elongation	BP	1	1	Equal	1
GO:0006275	regulation of DNA replication	BP	1	1	Equal	1
GO:0006298	mismatch repair	BP	1	1	Equal	1
GO:0006355	regulation of DNA-templated transcription	BP	0.526112	1	Equal	1
GO:0006401	RNA catabolic process	BP	1	1	Equal	1
GO:0006415	translational termination	BP	1	1	Equal	1
GO:0006457	protein folding	BP	1	1	Equal	1
GO:0006458	'de novo' protein folding	BP	1	1	Equal	1
GO:0006486	protein glycosylation	BP	1	1	Equal	1
GO:0006487	protein N-linked glycosylation	BP	1	1	Equal	1
GO:0006541	glutamine metabolic process	BP	1	1	Equal	1
GO:0006542	glutamine biosynthetic process	BP	1	1	Equal	1
GO:0006555	methionine metabolic process	BP	1	1	Equal	1
GO:0006566	threonine metabolic process	BP	1	1	Equal	1
GO:0006631	fatty acid metabolic process	BP	1	1	Equal	1
GO:0006739	NADP metabolic process	BP	1	1	Equal	1
GO:0006741	NADP biosynthetic process	BP	1	1	Equal	1
GO:0006753	nucleoside phosphate metabolic process	BP	0.443651	1	Equal	1
GO:0006766	vitamin metabolic process	BP	0.684231	1	Equal	1
GO:0006767	water-soluble vitamin metabolic process	BP	0.684231	1	Equal	1
GO:0006769	nicotinamide metabolic process	BP	1	1	Equal	1
GO:0006979	response to oxidative stress	BP	1	1	Equal	1
GO:0006986	response to unfolded protein	BP	1	1	Equal	1
GO:0007010	cytoskeleton organization	BP	1	1	Equal	1
GO:0007049	cell cycle	BP	0.646311	1	Equal	1
GO:0007154	cell communication	BP	0.646311	1	Equal	1
GO:0008156	negative regulation of DNA replication	BP	1	1	Equal	1
GO:0008374	O-acyltransferase activity	MF	1	1	Equal	1
GO:0008381	mechanosensitive monoatomic ion channel activity	MF	1	1	Equal	1
GO:0008728	GTP diphosphokinase activity	MF	1	1	Equal	1
GO:0008839	4-hydroxy-tetrahydrodipicolinate reductase	MF	1	1	Equal	1
GO:0008893	guanosine-3',5'-bis(diphosphate) 3'-diphosphatase activity	MF	1	1	Equal	1
GO:0008899	homoserine O-succinyltransferase activity	MF	1	1	Equal	1
GO:0008964	phosphoenolpyruvate carboxylase activity	MF	1	1	Equal	1
GO:0008976	polyphosphate kinase activity	MF	1	1	Equal	1
GO:0009041	UMP/dUMP kinase activity	MF	1	1	Equal	1
GO:0009066	aspartate family amino acid metabolic process	BP	1	1	Equal	1
GO:0009067	aspartate family amino acid biosynthetic process	BP	1	1	Equal	1
GO:0009086	methionine biosynthetic process	BP	1	1	Equal	1
GO:0009088	threonine biosynthetic process	BP	1	1	Equal	1
GO:0009092	homoserine metabolic process	BP	1	1	Equal	1
GO:0009100	glycoprotein metabolic process	BP	1	1	Equal	1
GO:0009101	glycoprotein biosynthetic process	BP	1	1	Equal	1
GO:0009110	vitamin biosynthetic process	BP	0.646311	1	Equal	1
GO:0009112	nucleobase metabolic process	BP	1	1	Equal	1
GO:0009113	purine nucleobase biosynthetic process	BP	1	1	Equal	1
GO:0009117	nucleotide metabolic process	BP	0.443651	1	Equal	1
GO:0009133	nucleoside diphosphate biosynthetic process	BP	1	1	Equal	1
GO:0009138	pyrimidine nucleoside diphosphate metabolic process	BP	1	1	Equal	1
GO:0009139	pyrimidine nucleoside diphosphate biosynthetic process	BP	1	1	Equal	1
GO:0009147	pyrimidine nucleoside triphosphate metabolic process	BP	1	1	Equal	1
GO:0009148	pyrimidine nucleoside triphosphate biosynthetic process	BP	1	1	Equal	1
GO:0009150	purine ribonucleotide metabolic process	BP	0.526112	1	Equal	1
GO:0009152	purine ribonucleotide biosynthetic process	BP	0.719348	1	Equal	1
GO:0009186	deoxyribonucleoside diphosphate metabolic process	BP	1	1	Equal	1
GO:0009189	deoxyribonucleoside diphosphate biosynthetic process	BP	1	1	Equal	1
GO:0009196	pyrimidine deoxyribonucleoside diphosphate metabolic process	BP	1	1	Equal	1
GO:0009197	pyrimidine deoxyribonucleoside diphosphate biosynthetic process	BP	1	1	Equal	1
GO:0009202	deoxyribonucleoside triphosphate biosynthetic process	BP	1	1	Equal	1
GO:0009211	pyrimidine deoxyribonucleoside triphosphate metabolic process	BP	1	1	Equal	1
GO:0009212	pyrimidine deoxyribonucleoside triphosphate biosynthetic process	BP	1	1	Equal	1
GO:0009219	pyrimidine deoxyribonucleotide metabolic process	BP	1	1	Equal	1
GO:0009221	pyrimidine deoxyribonucleotide biosynthetic process	BP	1	1	Equal	1
GO:0009225	nucleotide-sugar metabolic process	BP	1	1	Equal	1
GO:0009263	deoxyribonucleotide biosynthetic process	BP	1	1	Equal	1
GO:0009265	2'-deoxyribonucleotide biosynthetic process	BP	1	1	Equal	1
GO:0009401	phosphoenolpyruvate-dependent sugar phosphotransferase system	BP	1	1	Equal	1
GO:0009408	response to heat	BP	1	1	Equal	1
GO:0009636	response to toxic substance	BP	1	1	Equal	1
GO:0009653	anatomical structure morphogenesis	BP	1	1	Equal	1
GO:0009820	alkaloid metabolic process	BP	1	1	Equal	1
GO:0009889	regulation of biosynthetic process	BP	0.555712	1	Equal	1
GO:0009890	negative regulation of biosynthetic process	BP	0.684231	1	Equal	1
GO:0009891	positive regulation of biosynthetic process	BP	1	1	Equal	1
GO:0009892	negative regulation of metabolic process	BP	0.684231	1	Equal	1
GO:0009893	positive regulation of metabolic process	BP	1	1	Equal	1
GO:0009975	cyclase activity	MF	1	1	Equal	1
GO:0010038	response to metal ion	BP	0.646311	1	Equal	1
GO:0010043	response to zinc ion	BP	1	1	Equal	1
GO:0010468	regulation of gene expression	BP	0.526112	1	Equal	1
GO:0010556	regulation of macromolecule biosynthetic process	BP	0.555712	1	Equal	1
GO:0010557	positive regulation of macromolecule biosynthetic process	BP	1	1	Equal	1
GO:0010558	negative regulation of macromolecule biosynthetic process	BP	0.684231	1	Equal	1
GO:0010604	positive regulation of macromolecule metabolic process	BP	1	1	Equal	1
GO:0010605	negative regulation of macromolecule metabolic process	BP	0.684231	1	Equal	1
GO:0010628	positive regulation of gene expression	BP	1	1	Equal	1
GO:0010629	negative regulation of gene expression	BP	0.646311	1	Equal	1
GO:0015035	protein-disulfide reductase activity	MF	1	1	Equal	1
GO:0015036	disulfide oxidoreductase activity	MF	1	1	Equal	1
GO:0015078	proton transmembrane transporter activity	MF	0.646311	1	Equal	1
GO:0015297	antiporter activity	MF	1	1	Equal	1
GO:0015934	large ribosomal subunit	CC	0.646311	1	Equal	1
GO:0015935	small ribosomal subunit	CC	1	1	Equal	1
GO:0015969	guanosine tetraphosphate metabolic process	BP	1	1	Equal	1
GO:0015985	energy coupled proton transport, down electrochemical gradient	BP	0.646311	1	Equal	1
GO:0015986	proton motive force-driven ATP synthesis	BP	0.646311	1	Equal	1
GO:0016032	viral process	BP	1	1	Equal	1
GO:0016052	carbohydrate catabolic process	BP	1	1	Equal	1
GO:0016209	antioxidant activity	MF	1	1	Equal	1
GO:0016465	chaperonin ATPase complex	CC	1	1	Equal	1
GO:0016469	proton-transporting two-sector ATPase complex	CC	0.646311	1	Equal	1
GO:0016628	oxidoreductase activity, acting on the CH-CH group of donors, NAD or NADP as acceptor	MF	1	1	Equal	1
GO:0016651	oxidoreductase activity, acting on NAD(P)H	MF	1	1	Equal	1
GO:0016667	oxidoreductase activity, acting on a sulfur group of donors	MF	1	1	Equal	1
GO:0016668	oxidoreductase activity, acting on a sulfur group of donors, NAD(P) as acceptor	MF	1	1	Equal	1
GO:0016671	oxidoreductase activity, acting on a sulfur group of donors, disulfide as acceptor	MF	1	1	Equal	1
GO:0016748	succinyltransferase activity	MF	1	1	Equal	1
GO:0016750	O-succinyltransferase activity	MF	1	1	Equal	1
GO:0016778	diphosphotransferase activity	MF	1	1	Equal	1
GO:0016794	diphosphoric monoester hydrolase activity	MF	1	1	Equal	1
GO:0016831	carboxy-lyase activity	MF	0.646311	1	Equal	1
GO:0016849	phosphorus-oxygen lyase activity	MF	1	1	Equal	1
GO:0016860	intramolecular oxidoreductase activity	MF	1	1	Equal	1
GO:0016861	intramolecular oxidoreductase activity, interconverting aldoses and ketoses	MF	1	1	Equal	1
GO:0016891	RNA endonuclease activity, producing 5'-phosphomonoesters	MF	0.684231	1	Equal	1
GO:0016893	endonuclease activity, active with either ribo- or deoxyribonucleic acids and producing 5'-phosphomonoesters	MF	0.684231	1	Equal	1
GO:0017111	ribonucleoside triphosphate phosphatase activity	MF	0.443651	1	Equal	1
GO:0018193	peptidyl-amino acid modification	BP	1	1	Equal	1
GO:0019003	GDP binding	MF	1	1	Equal	1
GO:0019058	viral life cycle	BP	1	1	Equal	1
GO:0019068	virion assembly	BP	1	1	Equal	1
GO:0019202	amino acid kinase activity	MF	1	1	Equal	1
GO:0019205	nucleobase-containing compound kinase activity	MF	1	1	Equal	1
GO:0019219	regulation of nucleobase-containing compound metabolic process	BP	0.555712	1	Equal	1
GO:0019222	regulation of metabolic process	BP	0.555712	1	Equal	1
GO:0019725	cellular homeostasis	BP	1	1	Equal	1
GO:0019829	ATPase-coupled monoatomic cation transmembrane transporter activity	MF	0.646311	1	Equal	1
GO:0019877	diaminopimelate biosynthetic process	BP	1	1	Equal	1
GO:0022402	cell cycle process	BP	0.646311	1	Equal	1
GO:0022411	cellular component disassembly	BP	1	1	Equal	1
GO:0022616	DNA strand elongation	BP	1	1	Equal	1
GO:0022625	cytosolic large ribosomal subunit	CC	0.646311	1	Equal	1
GO:0022626	cytosolic ribosome	CC	0.646311	1	Equal	1
GO:0022853	active monoatomic ion transmembrane transporter activity	MF	0.646311	1	Equal	1
GO:0030145	manganese ion binding	MF	1	1	Equal	1
GO:0030154	cell differentiation	BP	1	1	Equal	1
GO:0030174	regulation of DNA-templated DNA replication initiation	BP	1	1	Equal	1
GO:0030435	sporulation resulting in formation of a cellular spore	BP	1	1	Equal	1
GO:0030677	ribonuclease P complex	CC	1	1	Equal	1
GO:0031106	septin ring organization	BP	1	1	Equal	1
GO:0031123	RNA 3'-end processing	BP	0.646311	1	Equal	1
GO:0031323	regulation of cellular metabolic process	BP	0.555712	1	Equal	1
GO:0031324	negative regulation of cellular metabolic process	BP	0.684231	1	Equal	1
GO:0031325	positive regulation of cellular metabolic process	BP	1	1	Equal	1
GO:0031326	regulation of cellular biosynthetic process	BP	0.555712	1	Equal	1
GO:0031327	negative regulation of cellular biosynthetic process	BP	0.684231	1	Equal	1
GO:0031328	positive regulation of cellular biosynthetic process	BP	1	1	Equal	1
GO:0031404	chloride ion binding	MF	1	1	Equal	1
GO:0031522	cell envelope Sec protein transport complex	CC	0.646311	1	Equal	1
GO:0031667	response to nutrient levels	BP	1	1	Equal	1
GO:0032185	septin cytoskeleton organization	BP	1	1	Equal	1
GO:0032297	negative regulation of DNA-templated DNA replication initiation	BP	1	1	Equal	1
GO:0032299	ribonuclease H2 complex	CC	1	1	Equal	1
GO:0032502	developmental process	BP	1	1	Equal	1
GO:0032506	cytokinetic process	BP	0.646311	1	Equal	1
GO:0032984	protein-containing complex disassembly	BP	1	1	Equal	1
GO:0032993	protein-DNA complex	CC	1	1	Equal	1
GO:0033177	proton-transporting two-sector ATPase complex, proton-transporting domain	CC	0.646311	1	Equal	1
GO:0033204	ribonuclease P RNA binding	MF	1	1	Equal	1
GO:0033567	DNA replication, Okazaki fragment processing	BP	1	1	Equal	1
GO:0034035	purine ribonucleoside bisphosphate metabolic process	BP	1	1	Equal	1
GO:0034599	cellular response to oxidative stress	BP	1	1	Equal	1
GO:0034605	cellular response to heat	BP	1	1	Equal	1
GO:0035375	zymogen binding	MF	1	1	Equal	1
GO:0035966	response to topologically incorrect protein	BP	1	1	Equal	1
GO:0036211	protein modification process	BP	0.719348	1	Equal	1
GO:0040007	growth	BP	0.646311	1	Equal	1
GO:0042278	purine nucleoside metabolic process	BP	1	1	Equal	1
GO:0042301	phosphate ion binding	MF	1	1	Equal	1
GO:0042364	water-soluble vitamin biosynthetic process	BP	0.646311	1	Equal	1
GO:0042440	pigment metabolic process	BP	1	1	Equal	1
GO:0042592	homeostatic process	BP	1	1	Equal	1
GO:0042594	response to starvation	BP	1	1	Equal	1
GO:0042625	ATPase-coupled ion transmembrane transporter activity	MF	0.646311	1	Equal	1
GO:0042777	proton motive force-driven plasma membrane ATP synthesis	BP	1	1	Equal	1
GO:0042780	tRNA 3'-end processing	BP	0.646311	1	Equal	1
GO:0042781	3'-tRNA processing endoribonuclease activity	MF	0.646311	1	Equal	1
GO:0042803	protein homodimerization activity	MF	1	1	Equal	1
GO:0043021	ribonucleoprotein complex binding	MF	0.646311	1	Equal	1
GO:0043022	ribosome binding	MF	1	1	Equal	1
GO:0043023	ribosomal large subunit binding	MF	1	1	Equal	1
GO:0043094	cellular metabolic compound salvage	BP	1	1	Equal	1
GO:0043096	purine nucleobase salvage	BP	1	1	Equal	1
GO:0043101	purine-containing compound salvage	BP	1	1	Equal	1
GO:0043137	DNA replication, removal of RNA primer	BP	1	1	Equal	1
GO:0043199	sulfate binding	MF	1	1	Equal	1
GO:0043413	macromolecule glycosylation	BP	1	1	Equal	1
GO:0043610	regulation of carbohydrate utilization	BP	1	1	Equal	1
GO:0043628	regulatory ncRNA 3'-end processing	BP	0.646311	1	Equal	1
GO:0043648	dicarboxylic acid metabolic process	BP	0.646311	1	Equal	1
GO:0043934	sporulation	BP	1	1	Equal	1
GO:0044282	small molecule catabolic process	BP	1	1	Equal	1
GO:0044391	ribosomal subunit	CC	0.684231	1	Equal	1
GO:0044769	ATPase activity, coupled to transmembrane movement of ions, rotational mechanism	MF	0.646311	1	Equal	1
GO:0044877	protein-containing complex binding	MF	0.646311	1	Equal	1
GO:0045259	proton-transporting ATP synthase complex	CC	0.646311	1	Equal	1
GO:0045263	proton-transporting ATP synthase complex, coupling factor F(o)	CC	0.646311	1	Equal	1
GO:0045454	cell redox homeostasis	BP	1	1	Equal	1
GO:0045892	negative regulation of DNA-templated transcription	BP	0.646311	1	Equal	1
GO:0045893	positive regulation of DNA-templated transcription	BP	1	1	Equal	1
GO:0045934	negative regulation of nucleobase-containing compound metabolic process	BP	0.684231	1	Equal	1
GO:0045935	positive regulation of nucleobase-containing compound metabolic process	BP	1	1	Equal	1
GO:0046072	dTDP metabolic process	BP	1	1	Equal	1
GO:0046075	dTTP metabolic process	BP	1	1	Equal	1
GO:0046077	dUDP metabolic process	BP	1	1	Equal	1
GO:0046083	adenine metabolic process	BP	1	1	Equal	1
GO:0046084	adenine biosynthetic process	BP	1	1	Equal	1
GO:0046112	nucleobase biosynthetic process	BP	1	1	Equal	1
GO:0046128	purine ribonucleoside metabolic process	BP	1	1	Equal	1
GO:0046148	pigment biosynthetic process	BP	1	1	Equal	1
GO:0046385	deoxyribose phosphate biosynthetic process	BP	1	1	Equal	1
GO:0046451	diaminopimelate metabolic process	BP	1	1	Equal	1
GO:0046677	response to antibiotic	BP	1	1	Equal	1
GO:0046686	response to cadmium ion	BP	1	1	Equal	1
GO:0046688	response to copper ion	BP	1	1	Equal	1
GO:0046933	proton-transporting ATP synthase activity, rotational mechanism	MF	0.646311	1	Equal	1
GO:0046940	nucleoside monophosphate phosphorylation	BP	1	1	Equal	1
GO:0046983	protein dimerization activity	MF	1	1	Equal	1
GO:0047134	protein-disulfide reductase (NAD(P)H) activity	MF	1	1	Equal	1
GO:0047297	asparagine-oxo-acid transaminase activity	MF	1	1	Equal	1
GO:0048519	negative regulation of biological process	BP	0.684231	1	Equal	1
GO:0048523	negative regulation of cellular process	BP	0.684231	1	Equal	1
GO:0048646	anatomical structure formation involved in morphogenesis	BP	1	1	Equal	1
GO:0048856	anatomical structure development	BP	1	1	Equal	1
GO:0048869	cellular developmental process	BP	1	1	Equal	1
GO:0050145	nucleoside monophosphate kinase activity	MF	1	1	Equal	1
GO:0050790	regulation of catalytic activity	BP	1	1	Equal	1
GO:0051052	regulation of DNA metabolic process	BP	1	1	Equal	1
GO:0051053	negative regulation of DNA metabolic process	BP	1	1	Equal	1
GO:0051082	unfolded protein binding	MF	1	1	Equal	1
GO:0051084	'de novo' post-translational protein folding	BP	1	1	Equal	1
GO:0051085	chaperone cofactor-dependent protein refolding	BP	1	1	Equal	1
GO:0051087	protein-folding chaperone binding	MF	1	1	Equal	1
GO:0051156	glucose 6-phosphate metabolic process	BP	1	1	Equal	1
GO:0051252	regulation of RNA metabolic process	BP	0.526112	1	Equal	1
GO:0051253	negative regulation of RNA metabolic process	BP	0.646311	1	Equal	1
GO:0051254	positive regulation of RNA metabolic process	BP	1	1	Equal	1
GO:0051301	cell division	BP	0.646311	1	Equal	1
GO:0051302	regulation of cell division	BP	0.646311	1	Equal	1
GO:0051781	positive regulation of cell division	BP	0.646311	1	Equal	1
GO:0052381	tRNA dimethylallyltransferase activity	MF	1	1	Equal	1
GO:0060255	regulation of macromolecule metabolic process	BP	0.555712	1	Equal	1
GO:0061077	chaperone-mediated protein folding	BP	1	1	Equal	1
GO:0061640	cytoskeleton-dependent cytokinesis	BP	1	1	Equal	1
GO:0065009	regulation of molecular function	BP	1	1	Equal	1
GO:0070085	glycosylation	BP	1	1	Equal	1
GO:0070548	L-glutamine aminotransferase activity	MF	1	1	Equal	1
GO:0070887	cellular response to chemical stimulus	BP	1	1	Equal	1
GO:0070925	organelle assembly	BP	1	1	Equal	1
GO:0070930	trans-translation-dependent protein tagging	BP	1	1	Equal	1
GO:0071214	cellular response to abiotic stimulus	BP	1	1	Equal	1
GO:0071470	cellular response to osmotic stress	BP	1	1	Equal	1
GO:0071897	DNA biosynthetic process	BP	1	1	Equal	1
GO:0072522	purine-containing compound biosynthetic process	BP	0.526112	1	Equal	1
GO:0072524	pyridine-containing compound metabolic process	BP	0.646311	1	Equal	1
GO:0072525	pyridine-containing compound biosynthetic process	BP	0.646311	1	Equal	1
GO:0080090	regulation of primary metabolic process	BP	0.555712	1	Equal	1
GO:0090329	regulation of DNA-templated DNA replication	BP	1	1	Equal	1
GO:0090529	cell septum assembly	BP	0.646311	1	Equal	1
GO:0097237	cellular response to toxic substance	BP	1	1	Equal	1
GO:0097501	stress response to metal ion	BP	1	1	Equal	1
GO:0098754	detoxification	BP	1	1	Equal	1
GO:0098796	membrane protein complex	CC	0.684231	1	Equal	1
GO:0098797	plasma membrane protein complex	CC	1	1	Equal	1
GO:0098869	cellular oxidant detoxification	BP	1	1	Equal	1
GO:0101031	protein folding chaperone complex	CC	1	1	Equal	1
GO:0104004	cellular response to environmental stimulus	BP	1	1	Equal	1
GO:0140110	transcription regulator activity	MF	1	1	Equal	1
GO:1901068	guanosine-containing compound metabolic process	BP	1	1	Equal	1
GO:1901681	sulfur compound binding	MF	0.646311	1	Equal	1
GO:1902410	mitotic cytokinetic process	BP	1	1	Equal	1
GO:1902555	endoribonuclease complex	CC	1	1	Equal	1
GO:1902600	proton transmembrane transport	BP	0.646311	1	Equal	1
GO:1902679	negative regulation of RNA biosynthetic process	BP	0.646311	1	Equal	1
GO:1902680	positive regulation of RNA biosynthetic process	BP	1	1	Equal	1
GO:1903047	mitotic cell cycle process	BP	1	1	Equal	1
GO:1904047	S-adenosyl-L-methionine binding	MF	1	1	Equal	1
GO:1905348	endonuclease complex	CC	1	1	Equal	1
GO:1990169	stress response to copper ion	BP	1	1	Equal	1
GO:1990170	stress response to cadmium ion	BP	1	1	Equal	1
GO:1990220	GroEL-GroES complex	CC	1	1	Equal	1
GO:1990748	cellular detoxification	BP	1	1	Equal	1
GO:1990904	ribonucleoprotein complex	CC	0.719348	1	Equal	1
GO:2000104	negative regulation of DNA-templated DNA replication	BP	1	1	Equal	1
GO:2001141	regulation of RNA biosynthetic process	BP	0.526112	1	Equal	1
GO:0005829	cytosol	CC	0.210273	1	Healthy	0.956522
GO:0055086	nucleobase-containing small molecule metabolic process	BP	0.502733	1	Healthy	0.916667
GO:0034654	nucleobase-containing compound biosynthetic process	BP	0.485692	1	Healthy	0.909091
GO:0009059	macromolecule biosynthetic process	BP	0.619782	1	Healthy	0.9
GO:0016462	pyrophosphatase activity	MF	0.619782	1	Healthy	0.9
GO:0016817	hydrolase activity, acting on acid anhydrides	MF	0.619782	1	Healthy	0.9
GO:0016818	hydrolase activity, acting on acid anhydrides, in phosphorus-containing anhydrides	MF	0.619782	1	Healthy	0.9
GO:1901137	carbohydrate derivative biosynthetic process	BP	0.600685	1	Healthy	0.888889
GO:0005215	transporter activity	MF	0.441908	1	Healthy	0.875
GO:0009165	nucleotide biosynthetic process	BP	0.58415	1	Healthy	0.875
GO:1901293	nucleoside phosphate biosynthetic process	BP	0.58415	1	Healthy	0.875
GO:0032991	protein-containing complex	CC	0.546443	1	Healthy	0.866667
GO:0009259	ribonucleotide metabolic process	BP	0.760044	1	Healthy	0.857143
GO:0016043	cellular component organization	BP	0.760044	1	Healthy	0.857143
GO:0016887	ATP hydrolysis activity	MF	0.760044	1	Healthy	0.857143
GO:0019693	ribose phosphate metabolic process	BP	0.760044	1	Healthy	0.857143
GO:0005737	cytoplasm	CC	0.251659	1	Healthy	0.844444
GO:0006810	transport	BP	0.580444	1	Healthy	0.833333
GO:0009260	ribonucleotide biosynthetic process	BP	0.743443	1	Healthy	0.833333
GO:0046390	ribose phosphate biosynthetic process	BP	0.743443	1	Healthy	0.833333
GO:0051179	localization	BP	0.580444	1	Healthy	0.833333
GO:0051234	establishment of localization	BP	0.580444	1	Healthy	0.833333
GO:0005622	intracellular anatomical structure	CC	0.243742	1	Healthy	0.830189
GO:0055085	transmembrane transport	BP	0.569176	1	Healthy	0.823529
GO:0019637	organophosphate metabolic process	BP	0.559871	1	Healthy	0.8125
GO:0022857	transmembrane transporter activity	MF	0.559871	1	Healthy	0.8125
GO:0004519	endonuclease activity	MF	1	1	Healthy	0.8
GO:0016853	isomerase activity	MF	1	1	Healthy	0.8
GO:0019538	protein metabolic process	BP	0.798868	1	Healthy	0.8
GO:0032787	monocarboxylic acid metabolic process	BP	1	1	Healthy	0.8
GO:0033554	cellular response to stress	BP	0.798868	1	Healthy	0.8
GO:0048518	positive regulation of biological process	BP	1	1	Healthy	0.8
GO:0048522	positive regulation of cellular process	BP	1	1	Healthy	0.8
GO:0097159	organic cyclic compound binding	MF	0.682578	1	Healthy	0.8
GO:1901363	heterocyclic compound binding	MF	0.682578	1	Healthy	0.8
GO:0006259	DNA metabolic process	BP	0.788792	1	Healthy	0.777778
GO:0016787	hydrolase activity	MF	0.615126	1	Healthy	0.772727
GO:0005515	protein binding	MF	0.823461	1	Healthy	0.769231
GO:0016020	membrane	CC	0.454352	1	Healthy	0.759259
GO:0000166	nucleotide binding	MF	1	1	Healthy	0.75
GO:0005886	plasma membrane	CC	0.535115	1	Healthy	0.75
GO:0006412	translation	BP	1	1	Healthy	0.75
GO:0006518	peptide metabolic process	BP	1	1	Healthy	0.75
GO:0006644	phospholipid metabolic process	BP	1	1	Healthy	0.75
GO:0006996	organelle organization	BP	1	1	Healthy	0.75
GO:0008654	phospholipid biosynthetic process	BP	1	1	Healthy	0.75
GO:0016765	transferase activity, transferring alkyl or aryl (other than methyl) groups	MF	1	1	Healthy	0.75
GO:0019842	vitamin binding	MF	1	1	Healthy	0.75
GO:0022607	cellular component assembly	BP	1	1	Healthy	0.75
GO:0022890	inorganic cation transmembrane transporter activity	MF	1	1	Healthy	0.75
GO:0033036	macromolecule localization	BP	1	1	Healthy	0.75
GO:0033865	nucleoside bisphosphate metabolic process	BP	1	1	Healthy	0.75
GO:0033875	ribonucleoside bisphosphate metabolic process	BP	1	1	Healthy	0.75
GO:0034032	purine nucleoside bisphosphate metabolic process	BP	1	1	Healthy	0.75
GO:0042578	phosphoric ester hydrolase activity	MF	1	1	Healthy	0.75
GO:0042802	identical protein binding	MF	0.816382	1	Healthy	0.75
GO:0043043	peptide biosynthetic process	BP	1	1	Healthy	0.75
GO:0043226	organelle	CC	1	1	Healthy	0.75
GO:0043228	non-membrane-bounded organelle	CC	1	1	Healthy	0.75
GO:0043229	intracellular organelle	CC	1	1	Healthy	0.75
GO:0043232	intracellular non-membrane-bounded organelle	CC	1	1	Healthy	0.75
GO:0043933	protein-containing complex organization	BP	1	1	Healthy	0.75
GO:0051716	cellular response to stimulus	BP	0.816382	1	Healthy	0.75
GO:0090407	organophosphate biosynthetic process	BP	0.816382	1	Healthy	0.75
GO:0098662	inorganic cation transmembrane transport	BP	1	1	Healthy	0.75
GO:1901265	nucleoside phosphate binding	MF	1	1	Healthy	0.75
GO:1902494	catalytic complex	CC	1	1	Healthy	0.75
GO:0005575	cellular_component	CC	0.433706	1	Healthy	0.728155
GO:0006950	response to stress	BP	0.830937	1	Healthy	0.714286
GO:0006974	DNA damage response	BP	1	1	Healthy	0.714286
GO:0032553	ribonucleotide binding	MF	1	1	Healthy	0.714286
GO:0097367	carbohydrate derivative binding	MF	1	1	Healthy	0.714286
GO:0006139	nucleobase-containing compound metabolic process	BP	0.774379	1	Healthy	0.709677
GO:0016788	hydrolase activity, acting on ester bonds	MF	1	1	Healthy	0.7
GO:0071944	cell periphery	CC	0.807024	1	Healthy	0.697674
GO:0005488	binding	MF	0.781594	1	Healthy	0.69697
GO:0071840	cellular component organization or biogenesis	BP	1	1	Healthy	0.692308
GO:0000455	enzyme-directed rRNA pseudouridine synthesis	BP	1	1	Healthy	0.666667
GO:0001522	pseudouridine synthesis	BP	1	1	Healthy	0.666667
GO:0001882	nucleoside binding	MF	1	1	Healthy	0.666667
GO:0001883	purine nucleoside binding	MF	1	1	Healthy	0.666667
GO:0003678	DNA helicase activity	MF	1	1	Healthy	0.666667
GO:0005525	GTP binding	MF	1	1	Healthy	0.666667
GO:0006220	pyrimidine nucleotide metabolic process	BP	1	1	Healthy	0.666667
GO:0006221	pyrimidine nucleotide biosynthetic process	BP	1	1	Healthy	0.666667
GO:0006508	proteolysis	BP	1	1	Healthy	0.666667
GO:0006886	intracellular protein transport	BP	1	1	Healthy	0.666667
GO:0006970	response to osmotic stress	BP	1	1	Healthy	0.666667
GO:0008320	protein transmembrane transporter activity	MF	1	1	Healthy	0.666667
GO:0008808	cardiolipin synthase activity	MF	1	1	Healthy	0.666667
GO:0009057	macromolecule catabolic process	BP	1	1	Healthy	0.666667
GO:0009069	serine family amino acid metabolic process	BP	1	1	Healthy	0.666667
GO:0009116	nucleoside metabolic process	BP	1	1	Healthy	0.666667
GO:0009119	ribonucleoside metabolic process	BP	1	1	Healthy	0.666667
GO:0009628	response to abiotic stimulus	BP	1	1	Healthy	0.666667
GO:0009982	pseudouridine synthase activity	MF	1	1	Healthy	0.666667
GO:0015179	L-amino acid transmembrane transporter activity	MF	1	1	Healthy	0.666667
GO:0015267	channel activity	MF	1	1	Healthy	0.666667
GO:0015291	secondary active transmembrane transporter activity	MF	1	1	Healthy	0.666667
GO:0015807	L-amino acid transport	BP	1	1	Healthy	0.666667
GO:0015936	coenzyme A metabolic process	BP	1	1	Healthy	0.666667
GO:0015937	coenzyme A biosynthetic process	BP	1	1	Healthy	0.666667
GO:0015980	energy derivation by oxidation of organic compounds	BP	1	1	Healthy	0.666667
GO:0016310	phosphorylation	BP	1	1	Healthy	0.666667
GO:0016614	oxidoreductase activity, acting on CH-OH group of donors	MF	1	1	Healthy	0.666667
GO:0016627	oxidoreductase activity, acting on the CH-CH group of donors	MF	1	1	Healthy	0.666667
GO:0016829	lyase activity	MF	1	1	Healthy	0.666667
GO:0016840	carbon-nitrogen lyase activity	MF	1	1	Healthy	0.666667
GO:0019001	guanyl nucleotide binding	MF	1	1	Healthy	0.666667
GO:0022613	ribonucleoprotein complex biogenesis	BP	1	1	Healthy	0.666667
GO:0022803	passive transmembrane transporter activity	MF	1	1	Healthy	0.666667
GO:0022836	gated channel activity	MF	1	1	Healthy	0.666667
GO:0022884	macromolecule transmembrane transporter activity	MF	1	1	Healthy	0.666667
GO:0030288	outer membrane-bounded periplasmic space	CC	1	1	Healthy	0.666667
GO:0030313	cell envelope	CC	1	1	Healthy	0.666667
GO:0030572	phosphatidyltransferase activity	MF	1	1	Healthy	0.666667
GO:0031118	rRNA pseudouridine synthesis	BP	1	1	Healthy	0.666667
GO:0031167	rRNA methylation	BP	1	1	Healthy	0.666667
GO:0032392	DNA geometric change	BP	1	1	Healthy	0.666667
GO:0032508	DNA duplex unwinding	BP	1	1	Healthy	0.666667
GO:0032549	ribonucleoside binding	MF	1	1	Healthy	0.666667
GO:0032550	purine ribonucleoside binding	MF	1	1	Healthy	0.666667
GO:0032561	guanyl ribonucleotide binding	MF	1	1	Healthy	0.666667
GO:0033866	nucleoside bisphosphate biosynthetic process	BP	1	1	Healthy	0.666667
GO:0034030	ribonucleoside bisphosphate biosynthetic process	BP	1	1	Healthy	0.666667
GO:0034033	purine nucleoside bisphosphate biosynthetic process	BP	1	1	Healthy	0.666667
GO:0042254	ribosome biogenesis	BP	1	1	Healthy	0.666667
GO:0042597	periplasmic space	CC	1	1	Healthy	0.666667
GO:0042887	amide transmembrane transporter activity	MF	1	1	Healthy	0.666667
GO:0043650	dicarboxylic acid biosynthetic process	BP	1	1	Healthy	0.666667
GO:0043937	regulation of sporulation	BP	1	1	Healthy	0.666667
GO:0043952	protein transport by the Sec complex	BP	1	1	Healthy	0.666667
GO:0044403	biological process involved in symbiotic interaction	BP	1	1	Healthy	0.666667
GO:0044419	biological process involved in interspecies interaction between organisms	BP	1	1	Healthy	0.666667
GO:0046907	intracellular transport	BP	1	1	Healthy	0.666667
GO:0046914	transition metal ion binding	MF	1	1	Healthy	0.666667
GO:0051276	chromosome organization	BP	1	1	Healthy	0.666667
GO:0051536	iron-sulfur cluster binding	MF	1	1	Healthy	0.666667
GO:0051539	4 iron, 4 sulfur cluster binding	MF	1	1	Healthy	0.666667
GO:0051540	metal cluster binding	MF	1	1	Healthy	0.666667
GO:0051641	cellular localization	BP	1	1	Healthy	0.666667
GO:0051649	establishment of localization in cell	BP	1	1	Healthy	0.666667
GO:0065002	intracellular protein transmembrane transport	BP	1	1	Healthy	0.666667
GO:0065003	protein-containing complex assembly	BP	1	1	Healthy	0.666667
GO:0065007	biological regulation	BP	1	1	Healthy	0.666667
GO:0070727	cellular macromolecule localization	BP	1	1	Healthy	0.666667
GO:0071103	DNA conformation change	BP	1	1	Healthy	0.666667
GO:0140097	catalytic activity, acting on DNA	MF	1	1	Healthy	0.666667
GO:1902475	L-alpha-amino acid transmembrane transport	BP	1	1	Healthy	0.666667
GO:1904680	peptide transmembrane transporter activity	MF	1	1	Healthy	0.666667
GO:0043170	macromolecule metabolic process	BP	1	1	Healthy	0.655172
GO:0006793	phosphorus metabolic process	BP	1	1	Healthy	0.653846
GO:0006796	phosphate-containing compound metabolic process	BP	1	1	Healthy	0.653846
GO:0050789	regulation of biological process	BP	1	1	Healthy	0.647059
GO:0003674	molecular_function	MF	1	1	Healthy	0.63964
GO:0008150	biological_process	BP	0.879512	1	Healthy	0.623932
GO:0010467	gene expression	BP	1	1	Healthy	0.615385
GO:0036094	small molecule binding	MF	1	1	Healthy	0.615385
GO:0043168	anion binding	MF	1	1	Healthy	0.615385
GO:0043412	macromolecule modification	BP	1	1	Healthy	0.615385
GO:0043167	ion binding	MF	1	1	Healthy	0.611111
GO:0000154	rRNA modification	BP	1	1	Healthy	0.6
GO:0005524	ATP binding	MF	1	1	Healthy	0.6
GO:0006302	double-strand break repair	BP	1	1	Healthy	0.6
GO:0006364	rRNA processing	BP	1	1	Healthy	0.6
GO:0006812	monoatomic cation transport	BP	1	1	Healthy	0.6
GO:0008324	monoatomic cation transmembrane transporter activity	MF	1	1	Healthy	0.6
GO:0008483	transaminase activity	MF	1	1	Healthy	0.6
GO:0008610	lipid biosynthetic process	BP	1	1	Healthy	0.6
GO:0009266	response to temperature stimulus	BP	1	1	Healthy	0.6
GO:0009295	nucleoid	CC	1	1	Healthy	0.6
GO:0016072	rRNA metabolic process	BP	1	1	Healthy	0.6
GO:0016301	kinase activity	MF	1	1	Healthy	0.6
GO:0016769	transferase activity, transferring nitrogenous groups	MF	1	1	Healthy	0.6
GO:0030554	adenyl nucleotide binding	MF	1	1	Healthy	0.6
GO:0032259	methylation	BP	1	1	Healthy	0.6
GO:0032559	adenyl ribonucleotide binding	MF	1	1	Healthy	0.6
GO:0042221	response to chemical	BP	1	1	Healthy	0.6
GO:0043590	bacterial nucleoid	CC	1	1	Healthy	0.6
GO:0044085	cellular component biogenesis	BP	1	1	Healthy	0.6
GO:0050794	regulation of cellular process	BP	1	1	Healthy	0.6
GO:0090304	nucleic acid metabolic process	BP	0.853112	1	Healthy	0.6
GO:0098655	monoatomic cation transmembrane transport	BP	1	1	Healthy	0.6
GO:0098660	inorganic ion transmembrane transport	BP	1	1	Healthy	0.6
GO:0050896	response to stimulus	BP	0.864272	1	Healthy	0.583333
GO:0004518	nuclease activity	MF	1	1	Healthy	0.571429
GO:0006281	DNA repair	BP	1	1	Healthy	0.571429
GO:0015318	inorganic molecular entity transmembrane transporter activity	MF	1	1	Healthy	0.571429
GO:0017076	purine nucleotide binding	MF	1	1	Healthy	0.571429
GO:0032555	purine ribonucleotide binding	MF	1	1	Healthy	0.571429
GO:0035639	purine ribonucleoside triphosphate binding	MF	1	1	Healthy	0.571429
GO:0140098	catalytic activity, acting on RNA	MF	0.775058	1	Healthy	0.555556
GO:0016772	transferase activity, transferring phosphorus-containing groups	MF	0.704991	1	Healthy	0.55
GO:0006396	RNA processing	BP	0.793743	1	Healthy	0.545455
GO:0009987	cellular process	BP	0.0770294	1	Healthy	0.544262
GO:0016070	RNA metabolic process	BP	0.809713	1	Healthy	0.538462
GO:0003824	catalytic activity	MF	0.304711	1	Healthy	0.52439
GO:0000050	urea cycle	BP	1	1	Healthy	0.5
GO:0000053	argininosuccinate metabolic process	BP	1	1	Healthy	0.5
GO:0000155	phosphorelay sensor kinase activity	MF	1	1	Healthy	0.5
GO:0000160	phosphorelay signal transduction system	BP	1	1	Healthy	0.5
GO:0000272	polysaccharide catabolic process	BP	1	1	Healthy	0.5
GO:0001510	RNA methylation	BP	1	1	Healthy	0.5
GO:0002949	tRNA threonylcarbamoyladenosine modification	BP	1	1	Healthy	0.5
GO:0003333	amino acid transmembrane transport	BP	1	1	Healthy	0.5
GO:0003723	RNA binding	MF	1	1	Healthy	0.5
GO:0003724	RNA helicase activity	MF	1	1	Healthy	0.5
GO:0003729	mRNA binding	MF	1	1	Healthy	0.5
GO:0003730	mRNA 3'-UTR binding	MF	1	1	Healthy	0.5
GO:0003879	ATP phosphoribosyltransferase activity	MF	1	1	Healthy	0.5
GO:0003933	GTP cyclohydrolase activity	MF	1	1	Healthy	0.5
GO:0003934	GTP cyclohydrolase I activity	MF	1	1	Healthy	0.5
GO:0003942	N-acetyl-gamma-glutamyl-phosphate reductase activity	MF	1	1	Healthy	0.5
GO:0003949	1-(5-phosphoribosyl)-5-[(5-phosphoribosylamino)methylideneamino]imidazole-4-carboxamide isomerase activity	MF	1	1	Healthy	0.5
GO:0003991	acetylglutamate kinase activity	MF	1	1	Healthy	0.5
GO:0003992	N2-acetyl-L-ornithine:2-oxoglutarate 5-aminotransferase activity	MF	1	1	Healthy	0.5
GO:0003994	aconitate hydratase activity	MF	1	1	Healthy	0.5
GO:0004042	L-glutamate N-acetyltransferase activity	MF	1	1	Healthy	0.5
GO:0004048	anthranilate phosphoribosyltransferase activity	MF	1	1	Healthy	0.5
GO:0004055	argininosuccinate synthase activity	MF	1	1	Healthy	0.5
GO:0004056	argininosuccinate lyase activity	MF	1	1	Healthy	0.5
GO:0004106	chorismate mutase activity	MF	1	1	Healthy	0.5
GO:0004140	dephospho-CoA kinase activity	MF	1	1	Healthy	0.5
GO:0004143	ATP-dependent diacylglycerol kinase activity	MF	1	1	Healthy	0.5
GO:0004152	dihydroorotate dehydrogenase activity	MF	1	1	Healthy	0.5
GO:0004156	dihydropteroate synthase activity	MF	1	1	Healthy	0.5
GO:0004358	glutamate N-acetyltransferase activity	MF	1	1	Healthy	0.5
GO:0004386	helicase activity	MF	1	1	Healthy	0.5
GO:0004399	histidinol dehydrogenase activity	MF	1	1	Healthy	0.5
GO:0004424	imidazoleglycerol-phosphate dehydratase activity	MF	1	1	Healthy	0.5
GO:0004425	indole-3-glycerol-phosphate synthase activity	MF	1	1	Healthy	0.5
GO:0004595	pantetheine-phosphate adenylyltransferase activity	MF	1	1	Healthy	0.5
GO:0004636	phosphoribosyl-ATP diphosphatase activity	MF	1	1	Healthy	0.5
GO:0004645	1,4-alpha-oligoglucan phosphorylase activity	MF	1	1	Healthy	0.5
GO:0004648	O-phospho-L-serine:2-oxoglutarate aminotransferase activity	MF	1	1	Healthy	0.5
GO:0004659	prenyltransferase activity	MF	1	1	Healthy	0.5
GO:0004664	prephenate dehydratase activity	MF	1	1	Healthy	0.5
GO:0004672	protein kinase activity	MF	1	1	Healthy	0.5
GO:0004673	protein histidine kinase activity	MF	1	1	Healthy	0.5
GO:0004721	phosphoprotein phosphatase activity	MF	1	1	Healthy	0.5
GO:0004764	shikimate 3-dehydrogenase (NADP+) activity	MF	1	1	Healthy	0.5
GO:0004765	shikimate kinase activity	MF	1	1	Healthy	0.5
GO:0004812	aminoacyl-tRNA ligase activity	MF	1	1	Healthy	0.5
GO:0004813	alanine-tRNA ligase activity	MF	1	1	Healthy	0.5
GO:0005216	monoatomic ion channel activity	MF	1	1	Healthy	0.5
GO:0005244	voltage-gated monoatomic ion channel activity	MF	1	1	Healthy	0.5
GO:0005249	voltage-gated potassium channel activity	MF	1	1	Healthy	0.5
GO:0005261	monoatomic cation channel activity	MF	1	1	Healthy	0.5
GO:0005267	potassium channel activity	MF	1	1	Healthy	0.5
GO:0005310	dicarboxylic acid transmembrane transporter activity	MF	1	1	Healthy	0.5
GO:0005326	neurotransmitter transmembrane transporter activity	MF	1	1	Healthy	0.5
GO:0005342	organic acid transmembrane transporter activity	MF	1	1	Healthy	0.5
GO:0005576	extracellular region	CC	0.77721	1	Healthy	0.5
GO:0005618	cell wall	CC	0.712206	1	Healthy	0.5
GO:0005976	polysaccharide metabolic process	BP	1	1	Healthy	0.5
GO:0005977	glycogen metabolic process	BP	1	1	Healthy	0.5
GO:0005980	glycogen catabolic process	BP	1	1	Healthy	0.5
GO:0006020	inositol metabolic process	BP	1	1	Healthy	0.5
GO:0006081	cellular aldehyde metabolic process	BP	1	1	Healthy	0.5
GO:0006099	tricarboxylic acid cycle	BP	1	1	Healthy	0.5
GO:0006101	citrate metabolic process	BP	1	1	Healthy	0.5
GO:0006112	energy reserve metabolic process	BP	1	1	Healthy	0.5
GO:0006399	tRNA metabolic process	BP	0.749453	1	Healthy	0.5
GO:0006418	tRNA aminoacylation for protein translation	BP	1	1	Healthy	0.5
GO:0006419	alanyl-tRNA aminoacylation	BP	1	1	Healthy	0.5
GO:0006468	protein phosphorylation	BP	1	1	Healthy	0.5
GO:0006470	protein dephosphorylation	BP	1	1	Healthy	0.5
GO:0006558	L-phenylalanine metabolic process	BP	1	1	Healthy	0.5
GO:0006563	L-serine metabolic process	BP	1	1	Healthy	0.5
GO:0006564	L-serine biosynthetic process	BP	1	1	Healthy	0.5
GO:0006570	tyrosine metabolic process	BP	1	1	Healthy	0.5
GO:0006571	tyrosine biosynthetic process	BP	1	1	Healthy	0.5
GO:0006592	ornithine biosynthetic process	BP	1	1	Healthy	0.5
GO:0006629	lipid metabolic process	BP	0.712206	1	Healthy	0.5
GO:0006650	glycerophospholipid metabolic process	BP	1	1	Healthy	0.5
GO:0006720	isoprenoid metabolic process	BP	1	1	Healthy	0.5
GO:0006729	tetrahydrobiopterin biosynthetic process	BP	1	1	Healthy	0.5
GO:0006730	one-carbon metabolic process	BP	1	1	Healthy	0.5
GO:0006813	potassium ion transport	BP	1	1	Healthy	0.5
GO:0006835	dicarboxylic acid transport	BP	1	1	Healthy	0.5
GO:0006836	neurotransmitter transport	BP	1	1	Healthy	0.5
GO:0006865	amino acid transport	BP	1	1	Healthy	0.5
GO:0007059	chromosome segregation	BP	1	1	Healthy	0.5
GO:0008033	tRNA processing	BP	0.749453	1	Healthy	0.5
GO:0008080	N-acetyltransferase activity	MF	1	1	Healthy	0.5
GO:0008104	protein localization	BP	1	1	Healthy	0.5
GO:0008168	methyltransferase activity	MF	1	1	Healthy	0.5
GO:0008184	glycogen phosphorylase activity	MF	1	1	Healthy	0.5
GO:0008186	ATP-dependent activity, acting on RNA	MF	1	1	Healthy	0.5
GO:0008270	zinc ion binding	MF	1	1	Healthy	0.5
GO:0008299	isoprenoid biosynthetic process	BP	1	1	Healthy	0.5
GO:0008408	3'-5' exonuclease activity	MF	1	1	Healthy	0.5
GO:0008519	ammonium channel activity	MF	1	1	Healthy	0.5
GO:0008614	pyridoxine metabolic process	BP	1	1	Healthy	0.5
GO:0008616	queuosine biosynthetic process	BP	1	1	Healthy	0.5
GO:0008649	rRNA methyltransferase activity	MF	1	1	Healthy	0.5
GO:0008757	S-adenosylmethionine-dependent methyltransferase activity	MF	1	1	Healthy	0.5
GO:0008934	inositol monophosphate 1-phosphatase activity	MF	1	1	Healthy	0.5
GO:0009060	aerobic respiration	BP	1	1	Healthy	0.5
GO:0009070	serine family amino acid biosynthetic process	BP	1	1	Healthy	0.5
GO:0009094	L-phenylalanine biosynthetic process	BP	1	1	Healthy	0.5
GO:0009095	aromatic amino acid family biosynthetic process, prephenate pathway	BP	1	1	Healthy	0.5
GO:0009163	nucleoside biosynthetic process	BP	1	1	Healthy	0.5
GO:0009218	pyrimidine ribonucleotide metabolic process	BP	1	1	Healthy	0.5
GO:0009220	pyrimidine ribonucleotide biosynthetic process	BP	1	1	Healthy	0.5
GO:0009251	glucan catabolic process	BP	1	1	Healthy	0.5
GO:0009273	peptidoglycan-based cell wall biogenesis	BP	1	1	Healthy	0.5
GO:0009360	DNA polymerase III complex	CC	1	1	Healthy	0.5
GO:0009403	toxin biosynthetic process	BP	1	1	Healthy	0.5
GO:0009404	toxin metabolic process	BP	1	1	Healthy	0.5
GO:0009423	chorismate biosynthetic process	BP	1	1	Healthy	0.5
GO:0009607	response to biotic stimulus	BP	1	1	Healthy	0.5
GO:0009977	proton motive force dependent protein transmembrane transporter activity	MF	1	1	Healthy	0.5
GO:0010501	RNA secondary structure unwinding	BP	1	1	Healthy	0.5
GO:0015031	protein transport	BP	1	1	Healthy	0.5
GO:0015079	potassium ion transmembrane transporter activity	MF	1	1	Healthy	0.5
GO:0015101	organic cation transmembrane transporter activity	MF	1	1	Healthy	0.5
GO:0015103	inorganic anion transmembrane transporter activity	MF	1	1	Healthy	0.5
GO:0015116	sulfate transmembrane transporter activity	MF	1	1	Healthy	0.5
GO:0015138	fumarate transmembrane transporter activity	MF	1	1	Healthy	0.5
GO:0015141	succinate transmembrane transporter activity	MF	1	1	Healthy	0.5
GO:0015171	amino acid transmembrane transporter activity	MF	1	1	Healthy	0.5
GO:0015172	acidic amino acid transmembrane transporter activity	MF	1	1	Healthy	0.5
GO:0015183	L-aspartate transmembrane transporter activity	MF	1	1	Healthy	0.5
GO:0015199	amino-acid betaine transmembrane transporter activity	MF	1	1	Healthy	0.5
GO:0015440	ABC-type peptide transporter activity	MF	1	1	Healthy	0.5
GO:0015462	ABC-type protein transporter activity	MF	1	1	Healthy	0.5
GO:0015556	C4-dicarboxylate transmembrane transporter activity	MF	1	1	Healthy	0.5
GO:0015651	quaternary ammonium group transmembrane transporter activity	MF	1	1	Healthy	0.5
GO:0015695	organic cation transport	BP	1	1	Healthy	0.5
GO:0015697	quaternary ammonium group transport	BP	1	1	Healthy	0.5
GO:0015698	inorganic anion transport	BP	1	1	Healthy	0.5
GO:0015740	C4-dicarboxylate transport	BP	1	1	Healthy	0.5
GO:0015741	fumarate transport	BP	1	1	Healthy	0.5
GO:0015744	succinate transport	BP	1	1	Healthy	0.5
GO:0015800	acidic amino acid transport	BP	1	1	Healthy	0.5
GO:0015810	aspartate transmembrane transport	BP	1	1	Healthy	0.5
GO:0015833	peptide transport	BP	1	1	Healthy	0.5
GO:0015838	amino-acid betaine transport	BP	1	1	Healthy	0.5
GO:0015849	organic acid transport	BP	1	1	Healthy	0.5
GO:0015939	pantothenate metabolic process	BP	1	1	Healthy	0.5
GO:0015940	pantothenate biosynthetic process	BP	1	1	Healthy	0.5
GO:0016407	acetyltransferase activity	MF	1	1	Healthy	0.5
GO:0016410	N-acyltransferase activity	MF	1	1	Healthy	0.5
GO:0016426	tRNA (adenine) methyltransferase activity	MF	1	1	Healthy	0.5
GO:0016635	oxidoreductase activity, acting on the CH-CH group of donors, quinone or related compound as acceptor	MF	1	1	Healthy	0.5
GO:0016645	oxidoreductase activity, acting on the CH-NH group of donors	MF	1	1	Healthy	0.5
GO:0016646	oxidoreductase activity, acting on the CH-NH group of donors, NAD or NADP as acceptor	MF	1	1	Healthy	0.5
GO:0016741	transferase activity, transferring one-carbon groups	MF	1	1	Healthy	0.5
GO:0016746	acyltransferase activity	MF	1	1	Healthy	0.5
GO:0016747	acyltransferase activity, transferring groups other than amino-acyl groups	MF	1	1	Healthy	0.5
GO:0016758	hexosyltransferase activity	MF	1	1	Healthy	0.5
GO:0016774	phosphotransferase activity, carboxyl group as acceptor	MF	1	1	Healthy	0.5
GO:0016775	phosphotransferase activity, nitrogenous group as acceptor	MF	1	1	Healthy	0.5
GO:0016779	nucleotidyltransferase activity	MF	1	1	Healthy	0.5
GO:0016780	phosphotransferase activity, for other substituted phosphate groups	MF	1	1	Healthy	0.5
GO:0016810	hydrolase activity, acting on carbon-nitrogen (but not peptide) bonds	MF	1	1	Healthy	0.5
GO:0016814	hydrolase activity, acting on carbon-nitrogen (but not peptide) bonds, in cyclic amidines	MF	1	1	Healthy	0.5
GO:0016842	amidine-lyase activity	MF	1	1	Healthy	0.5
GO:0016866	intramolecular transferase activity	MF	1	1	Healthy	0.5
GO:0016875	ligase activity, forming carbon-oxygen bonds	MF	1	1	Healthy	0.5
GO:0016882	cyclo-ligase activity	MF	1	1	Healthy	0.5
GO:0016999	antibiotic metabolic process	BP	1	1	Healthy	0.5
GO:0018106	peptidyl-histidine phosphorylation	BP	1	1	Healthy	0.5
GO:0018202	peptidyl-histidine modification	BP	1	1	Healthy	0.5
GO:0019238	cyclohydrolase activity	MF	1	1	Healthy	0.5
GO:0019541	propionate metabolic process	BP	1	1	Healthy	0.5
GO:0019627	urea metabolic process	BP	1	1	Healthy	0.5
GO:0019679	propionate metabolic process, methylcitrate cycle	BP	1	1	Healthy	0.5
GO:0019748	secondary metabolic process	BP	1	1	Healthy	0.5
GO:0022832	voltage-gated channel activity	MF	1	1	Healthy	0.5
GO:0022839	monoatomic ion-gated channel activity	MF	1	1	Healthy	0.5
GO:0022843	voltage-gated monoatomic cation channel activity	MF	1	1	Healthy	0.5
GO:0030001	metal ion transport	BP	1	1	Healthy	0.5
GO:0030170	pyridoxal phosphate binding	MF	1	1	Healthy	0.5
GO:0030272	5-formyltetrahydrofolate cyclo-ligase activity	MF	1	1	Healthy	0.5
GO:0030312	external encapsulating structure	CC	0.712206	1	Healthy	0.5
GO:0030428	cell septum	CC	1	1	Healthy	0.5
GO:0031279	regulation of cyclase activity	BP	1	1	Healthy	0.5
GO:0031281	positive regulation of cyclase activity	BP	1	1	Healthy	0.5
GO:0031460	glycine betaine transport	BP	1	1	Healthy	0.5
GO:0033281	TAT protein transport complex	CC	1	1	Healthy	0.5
GO:0034311	diol metabolic process	BP	1	1	Healthy	0.5
GO:0034312	diol biosynthetic process	BP	1	1	Healthy	0.5
GO:0034618	arginine binding	MF	1	1	Healthy	0.5
GO:0035556	intracellular signal transduction	BP	1	1	Healthy	0.5
GO:0035999	tetrahydrofolate interconversion	BP	1	1	Healthy	0.5
GO:0042173	regulation of sporulation resulting in formation of a cellular spore	BP	1	1	Healthy	0.5
GO:0042450	arginine biosynthetic process via ornithine	BP	1	1	Healthy	0.5
GO:0042455	ribonucleoside biosynthetic process	BP	1	1	Healthy	0.5
GO:0042546	cell wall biogenesis	BP	1	1	Healthy	0.5
GO:0042575	DNA polymerase complex	CC	1	1	Healthy	0.5
GO:0042602	riboflavin reductase (NADPH) activity	MF	1	1	Healthy	0.5
GO:0042816	vitamin B6 metabolic process	BP	1	1	Healthy	0.5
GO:0042819	vitamin B6 biosynthetic process	BP	1	1	Healthy	0.5
GO:0042822	pyridoxal phosphate metabolic process	BP	1	1	Healthy	0.5
GO:0042823	pyridoxal phosphate biosynthetic process	BP	1	1	Healthy	0.5
GO:0042886	amide transport	BP	1	1	Healthy	0.5
GO:0043038	amino acid activation	BP	1	1	Healthy	0.5
GO:0043039	tRNA aminoacylation	BP	1	1	Healthy	0.5
GO:0043085	positive regulation of catalytic activity	BP	1	1	Healthy	0.5
GO:0043138	3'-5' DNA helicase activity	MF	1	1	Healthy	0.5
GO:0043207	response to external biotic stimulus	BP	1	1	Healthy	0.5
GO:0043414	macromolecule methylation	BP	1	1	Healthy	0.5
GO:0043647	inositol phosphate metabolic process	BP	1	1	Healthy	0.5
GO:0043891	glyceraldehyde-3-phosphate dehydrogenase [NAD(P)+] (phosphorylating) activity	MF	1	1	Healthy	0.5
GO:0043938	positive regulation of sporulation	BP	1	1	Healthy	0.5
GO:0043953	protein transport by the Tat complex	BP	1	1	Healthy	0.5
GO:0044042	glucan metabolic process	BP	1	1	Healthy	0.5
GO:0044093	positive regulation of molecular function	BP	1	1	Healthy	0.5
GO:0044255	cellular lipid metabolic process	BP	0.712206	1	Healthy	0.5
GO:0044550	secondary metabolite biosynthetic process	BP	1	1	Healthy	0.5
GO:0044776	DNA polymerase III, core complex	CC	1	1	Healthy	0.5
GO:0045004	DNA replication proofreading	BP	1	1	Healthy	0.5
GO:0045005	DNA-templated DNA replication maintenance of fidelity	BP	1	1	Healthy	0.5
GO:0045017	glycerolipid biosynthetic process	BP	1	1	Healthy	0.5
GO:0045184	establishment of protein localization	BP	1	1	Healthy	0.5
GO:0045333	cellular respiration	BP	1	1	Healthy	0.5
GO:0045595	regulation of cell differentiation	BP	1	1	Healthy	0.5
GO:0045597	positive regulation of cell differentiation	BP	1	1	Healthy	0.5
GO:0045761	regulation of adenylate cyclase activity	BP	1	1	Healthy	0.5
GO:0045762	positive regulation of adenylate cyclase activity	BP	1	1	Healthy	0.5
GO:0045881	positive regulation of sporulation resulting in formation of a cellular spore	BP	1	1	Healthy	0.5
GO:0046116	queuosine metabolic process	BP	1	1	Healthy	0.5
GO:0046146	tetrahydrobiopterin metabolic process	BP	1	1	Healthy	0.5
GO:0046164	alcohol catabolic process	BP	1	1	Healthy	0.5
GO:0046165	alcohol biosynthetic process	BP	1	1	Healthy	0.5
GO:0046173	polyol biosynthetic process	BP	1	1	Healthy	0.5
GO:0046174	polyol catabolic process	BP	1	1	Healthy	0.5
GO:0046184	aldehyde biosynthetic process	BP	1	1	Healthy	0.5
GO:0046417	chorismate metabolic process	BP	1	1	Healthy	0.5
GO:0046459	short-chain fatty acid metabolic process	BP	1	1	Healthy	0.5
GO:0046474	glycerophospholipid biosynthetic process	BP	1	1	Healthy	0.5
GO:0046486	glycerolipid metabolic process	BP	1	1	Healthy	0.5
GO:0046654	tetrahydrofolate biosynthetic process	BP	1	1	Healthy	0.5
GO:0046872	metal ion binding	MF	0.749453	1	Healthy	0.5
GO:0046873	metal ion transmembrane transporter activity	MF	1	1	Healthy	0.5
GO:0046942	carboxylic acid transport	BP	1	1	Healthy	0.5
GO:0046943	carboxylic acid transmembrane transporter activity	MF	1	1	Healthy	0.5
GO:0047100	glyceraldehyde-3-phosphate dehydrogenase (NADP+) (phosphorylating) activity	MF	1	1	Healthy	0.5
GO:0047456	2-methylisocitrate dehydratase activity	MF	1	1	Healthy	0.5
GO:0050661	NADP binding	MF	1	1	Healthy	0.5
GO:0051094	positive regulation of developmental process	BP	1	1	Healthy	0.5
GO:0051259	protein complex oligomerization	BP	1	1	Healthy	0.5
GO:0051260	protein homooligomerization	BP	1	1	Healthy	0.5
GO:0051339	regulation of lyase activity	BP	1	1	Healthy	0.5
GO:0051349	positive regulation of lyase activity	BP	1	1	Healthy	0.5
GO:0051701	biological process involved in interaction with host	BP	1	1	Healthy	0.5
GO:0051707	response to other organism	BP	1	1	Healthy	0.5
GO:0052693	epoxyqueuosine reductase activity	MF	1	1	Healthy	0.5
GO:0052745	inositol phosphate phosphatase activity	MF	1	1	Healthy	0.5
GO:0052834	inositol monophosphate phosphatase activity	MF	1	1	Healthy	0.5
GO:0052875	riboflavin reductase (NAD(P)H) activity	MF	1	1	Healthy	0.5
GO:0061695	transferase complex, transferring phosphorus-containing groups	CC	1	1	Healthy	0.5
GO:0065008	regulation of biological quality	BP	1	1	Healthy	0.5
GO:0070279	vitamin B6 binding	MF	1	1	Healthy	0.5
GO:0070475	rRNA base methylation	BP	1	1	Healthy	0.5
GO:0070525	tRNA threonylcarbamoyladenosine metabolic process	BP	1	1	Healthy	0.5
GO:0070566	adenylyltransferase activity	MF	1	1	Healthy	0.5
GO:0070778	L-aspartate transmembrane transport	BP	1	1	Healthy	0.5
GO:0071422	succinate transmembrane transport	BP	1	1	Healthy	0.5
GO:0071545	inositol phosphate catabolic process	BP	1	1	Healthy	0.5
GO:0071554	cell wall organization or biogenesis	BP	1	1	Healthy	0.5
GO:0071805	potassium ion transmembrane transport	BP	1	1	Healthy	0.5
GO:0071806	protein transmembrane transport	BP	1	1	Healthy	0.5
GO:0071941	nitrogen cycle metabolic process	BP	1	1	Healthy	0.5
GO:0072337	modified amino acid transport	BP	1	1	Healthy	0.5
GO:0072348	sulfur compound transport	BP	1	1	Healthy	0.5
GO:0072349	modified amino acid transmembrane transporter activity	MF	1	1	Healthy	0.5
GO:0072488	ammonium transmembrane transport	BP	1	1	Healthy	0.5
GO:0075136	response to host	BP	1	1	Healthy	0.5
GO:0075139	response to host iron concentration	BP	1	1	Healthy	0.5
GO:0098661	inorganic anion transmembrane transport	BP	1	1	Healthy	0.5
GO:0140101	catalytic activity, acting on a tRNA	MF	0.712206	1	Healthy	0.5
GO:0140102	catalytic activity, acting on a rRNA	MF	1	1	Healthy	0.5
GO:1901616	organic hydroxy compound catabolic process	BP	1	1	Healthy	0.5
GO:1901659	glycosyl compound biosynthetic process	BP	1	1	Healthy	0.5
GO:1901682	sulfur compound transmembrane transporter activity	MF	1	1	Healthy	0.5
GO:1902221	erythrose 4-phosphate/phosphoenolpyruvate family amino acid metabolic process	BP	1	1	Healthy	0.5
GO:1902223	erythrose 4-phosphate/phosphoenolpyruvate family amino acid biosynthetic process	BP	1	1	Healthy	0.5
GO:1902358	sulfate transmembrane transport	BP	1	1	Healthy	0.5
GO:1903600	glutaminase complex	CC	1	1	Healthy	0.5
GO:1903825	organic acid transmembrane transport	BP	1	1	Healthy	0.5
GO:1905039	carboxylic acid transmembrane transport	BP	1	1	Healthy	0.5
GO:1990234	transferase complex	CC	1	1	Healthy	0.5
GO:0009058	biosynthetic process	BP	0.272418	1	Healthy	0.489796
GO:0044249	cellular biosynthetic process	BP	0.272418	1	Healthy	0.489796
GO:0044281	small molecule metabolic process	BP	0.27676	1	Healthy	0.475
GO:0016740	transferase activity	MF	0.26671	1	Healthy	0.461538
GO:0009451	RNA modification	BP	0.544779	1	Healthy	0.444444
GO:0043169	cation binding	MF	0.544779	1	Healthy	0.444444
GO:0043603	amide metabolic process	BP	0.544779	1	Healthy	0.444444
GO:0006811	monoatomic ion transport	BP	0.430804	1	Healthy	0.416667
GO:0015075	monoatomic ion transmembrane transporter activity	MF	0.430804	1	Healthy	0.416667
GO:0016773	phosphotransferase activity, alcohol group as acceptor	MF	0.430804	1	Healthy	0.416667
GO:0034220	monoatomic ion transmembrane transport	BP	0.430804	1	Healthy	0.416667
GO:0032217	riboflavin transmembrane transporter activity	MF	0.65459	1	Healthy	0.4
GO:0032218	riboflavin transport	BP	0.65459	1	Healthy	0.4
GO:0035461	vitamin transmembrane transport	BP	0.65459	1	Healthy	0.4
GO:0050793	regulation of developmental process	BP	0.65459	1	Healthy	0.4
GO:0051180	vitamin transport	BP	0.65459	1	Healthy	0.4
GO:0090482	vitamin transmembrane transporter activity	MF	0.65459	1	Healthy	0.4
GO:0140096	catalytic activity, acting on a protein	MF	0.65459	1	Healthy	0.4
GO:0006820	monoatomic anion transport	BP	0.496811	1	Healthy	0.375
GO:0008509	monoatomic anion transmembrane transporter activity	MF	0.496811	1	Healthy	0.375
GO:0008514	organic anion transmembrane transporter activity	MF	0.496811	1	Healthy	0.375
GO:0015711	organic anion transport	BP	0.496811	1	Healthy	0.375
GO:0043604	amide biosynthetic process	BP	0.496811	1	Healthy	0.375
GO:0098656	monoatomic anion transmembrane transport	BP	0.496811	1	Healthy	0.375
GO:0016491	oxidoreductase activity	MF	0.271969	1	Healthy	0.363636
GO:0000107	imidazoleglycerol-phosphate synthase activity	MF	0.523885	1	Healthy	0.333333
GO:0000162	tryptophan biosynthetic process	BP	0.523885	1	Healthy	0.333333
GO:0000287	magnesium ion binding	MF	0.414436	1	Healthy	0.333333
GO:0004175	endopeptidase activity	MF	0.523885	1	Healthy	0.333333
GO:0004180	carboxypeptidase activity	MF	0.523885	1	Healthy	0.333333
GO:0004185	serine-type carboxypeptidase activity	MF	0.523885	1	Healthy	0.333333
GO:0004350	glutamate-5-semialdehyde dehydrogenase activity	MF	0.523885	1	Healthy	0.333333
GO:0006066	alcohol metabolic process	BP	0.523885	1	Healthy	0.333333
GO:0006310	DNA recombination	BP	0.523885	1	Healthy	0.333333
GO:0006400	tRNA modification	BP	0.414436	1	Healthy	0.333333
GO:0006568	tryptophan metabolic process	BP	0.523885	1	Healthy	0.333333
GO:0006576	biogenic amine metabolic process	BP	0.523885	1	Healthy	0.333333
GO:0006586	indolalkylamine metabolic process	BP	0.523885	1	Healthy	0.333333
GO:0006591	ornithine metabolic process	BP	0.523885	1	Healthy	0.333333
GO:0006760	folic acid-containing compound metabolic process	BP	0.523885	1	Healthy	0.333333
GO:0006855	xenobiotic transmembrane transport	BP	0.414436	1	Healthy	0.333333
GO:0007165	signal transduction	BP	0.523885	1	Healthy	0.333333
GO:0008094	ATP-dependent activity, acting on DNA	MF	0.523885	1	Healthy	0.333333
GO:0008173	RNA methyltransferase activity	MF	0.523885	1	Healthy	0.333333
GO:0008175	tRNA methyltransferase activity	MF	0.523885	1	Healthy	0.333333
GO:0008233	peptidase activity	MF	0.523885	1	Healthy	0.333333
GO:0008236	serine-type peptidase activity	MF	0.523885	1	Healthy	0.333333
GO:0008238	exopeptidase activity	MF	0.523885	1	Healthy	0.333333
GO:0008360	regulation of cell shape	BP	0.523885	1	Healthy	0.333333
GO:0009002	serine-type D-Ala-D-Ala carboxypeptidase activity	MF	0.523885	1	Healthy	0.333333
GO:0009308	amine metabolic process	BP	0.523885	1	Healthy	0.333333
GO:0009309	amine biosynthetic process	BP	0.523885	1	Healthy	0.333333
GO:0009396	folic acid-containing compound biosynthetic process	BP	0.523885	1	Healthy	0.333333
GO:0009409	response to cold	BP	0.523885	1	Healthy	0.333333
GO:0015450	protein-transporting ATPase activity	MF	0.523885	1	Healthy	0.333333
GO:0016311	dephosphorylation	BP	0.523885	1	Healthy	0.333333
GO:0016597	amino acid binding	MF	0.523885	1	Healthy	0.333333
GO:0016616	oxidoreductase activity, acting on the CH-OH group of donors, NAD or NADP as acceptor	MF	0.523885	1	Healthy	0.333333
GO:0016763	pentosyltransferase activity	MF	0.414436	1	Healthy	0.333333
GO:0016791	phosphatase activity	MF	0.523885	1	Healthy	0.333333
GO:0016879	ligase activity, forming carbon-nitrogen bonds	MF	0.523885	1	Healthy	0.333333
GO:0017171	serine hydrolase activity	MF	0.523885	1	Healthy	0.333333
GO:0019632	shikimate metabolic process	BP	0.523885	1	Healthy	0.333333
GO:0019751	polyol metabolic process	BP	0.523885	1	Healthy	0.333333
GO:0022604	regulation of cell morphogenesis	BP	0.523885	1	Healthy	0.333333
GO:0023052	signaling	BP	0.523885	1	Healthy	0.333333
GO:0030488	tRNA methylation	BP	0.523885	1	Healthy	0.333333
GO:0031406	carboxylic acid binding	MF	0.523885	1	Healthy	0.333333
GO:0042401	biogenic amine biosynthetic process	BP	0.523885	1	Healthy	0.333333
GO:0042430	indole-containing compound metabolic process	BP	0.523885	1	Healthy	0.333333
GO:0042435	indole-containing compound biosynthetic process	BP	0.523885	1	Healthy	0.333333
GO:0043177	organic acid binding	MF	0.523885	1	Healthy	0.333333
GO:0044283	small molecule biosynthetic process	BP	0.0771608	1	Healthy	0.333333
GO:0046219	indolalkylamine biosynthetic process	BP	0.523885	1	Healthy	0.333333
GO:0046653	tetrahydrofolate metabolic process	BP	0.523885	1	Healthy	0.333333
GO:0051128	regulation of cellular component organization	BP	0.523885	1	Healthy	0.333333
GO:0070008	serine-type exopeptidase activity	MF	0.523885	1	Healthy	0.333333
GO:0071705	nitrogen compound transport	BP	0.272474	1	Healthy	0.333333
GO:0072350	tricarboxylic acid metabolic process	BP	0.523885	1	Healthy	0.333333
GO:1900190	regulation of single-species biofilm formation	BP	0.523885	1	Healthy	0.333333
GO:1901617	organic hydroxy compound biosynthetic process	BP	0.523885	1	Healthy	0.333333
GO:0006082	organic acid metabolic process	BP	0.0470292	1	Healthy	0.307692
GO:0016757	glycosyltransferase activity	MF	0.258458	1	Healthy	0.285714
GO:0019752	carboxylic acid metabolic process	BP	0.0261349	1	Healthy	0.269231
GO:0043436	oxoacid metabolic process	BP	0.0261349	1	Healthy	0.269231
GO:0004527	exonuclease activity	MF	0.285828	1	Healthy	0.25
GO:0009064	glutamine family amino acid metabolic process	BP	0.160563	1	Healthy	0.25
GO:0009084	glutamine family amino acid biosynthetic process	BP	0.160563	1	Healthy	0.25
GO:0016053	organic acid biosynthetic process	BP	0.0201857	1	Healthy	0.25
GO:0016835	carbon-oxygen lyase activity	MF	0.285828	1	Healthy	0.25
GO:0016836	hydro-lyase activity	MF	0.285828	1	Healthy	0.25
GO:0016874	ligase activity	MF	0.285828	1	Healthy	0.25
GO:0022603	regulation of anatomical structure morphogenesis	BP	0.285828	1	Healthy	0.25
GO:0042398	cellular modified amino acid biosynthetic process	BP	0.285828	1	Healthy	0.25
GO:0042558	pteridine-containing compound metabolic process	BP	0.285828	1	Healthy	0.25
GO:0042559	pteridine-containing compound biosynthetic process	BP	0.285828	1	Healthy	0.25
GO:0046394	carboxylic acid biosynthetic process	BP	0.0201857	1	Healthy	0.25
GO:0047324	phosphoenolpyruvate-glycerone phosphotransferase activity	MF	0.285828	1	Healthy	0.25
GO:0006575	cellular modified amino acid metabolic process	BP	0.16111	1	Healthy	0.2
GO:0008652	amino acid biosynthetic process	BP	0.014823	1	Healthy	0.2
GO:0009072	aromatic amino acid metabolic process	BP	0.16111	1	Healthy	0.2
GO:0009073	aromatic amino acid family biosynthetic process	BP	0.16111	1	Healthy	0.2
GO:0016620	oxidoreductase activity, acting on the aldehyde or oxo group of donors, NAD or NADP as acceptor	MF	0.16111	1	Healthy	0.2
GO:0016903	oxidoreductase activity, acting on the aldehyde or oxo group of donors	MF	0.16111	1	Healthy	0.2
GO:0006520	amino acid metabolic process	BP	0.00949243	1	Healthy	0.190476
GO:1901605	alpha-amino acid metabolic process	BP	0.00909722	1	Healthy	0.166667
GO:1901607	alpha-amino acid biosynthetic process	BP	0.00909722	1	Healthy	0.166667
GO:1901615	organic hydroxy compound metabolic process	BP	0.163898	1	Healthy	0.166667
GO:0000105	L-histidine biosynthetic process	BP	0.0878741	1	Healthy	0.142857
GO:0006525	arginine metabolic process	BP	0.0878741	1	Healthy	0.142857
GO:0006526	L-arginine biosynthetic process	BP	0.0878741	1	Healthy	0.142857
GO:0006547	L-histidine metabolic process	BP	0.0878741	1	Healthy	0.142857
GO:0052803	imidazole-containing compound metabolic process	BP	0.0878741	1	Healthy	0.142857

## Sheet: Strep__gordonii
Supplementary Table S5: Streptococcus gordonii gene-specific enrichment
Gene	Freq_Healthy	Freq_Cancer	Freq_Diff	PValue	AdjPValue	Group	Species	Rank
group_10345	0	0.666667	-0.666667	0.00100334	0.0428455	More in Cancer	Strep. gordonii	33
group_10989	0	0.666667	-0.666667	0.00100334	0.0428455	More in Cancer	Strep. gordonii	30
group_11002	0.05	0.833333	-0.783333	0.000525561	0.0415194	More in Cancer	Strep. gordonii	14
group_11286	0.1	1	-0.9	0.000121618	0.0174687	More in Cancer	Strep. gordonii	5
group_11334	0	0.666667	-0.666667	0.00100334	0.0428455	More in Cancer	Strep. gordonii	28
group_11359	0	0.666667	-0.666667	0.00100334	0.0428455	More in Cancer	Strep. gordonii	24
group_11507	0	0.833333	-0.833333	9.12131e-05	0.0174687	More in Cancer	Strep. gordonii	6
group_11576	0	0.666667	-0.666667	0.00100334	0.0428455	More in Cancer	Strep. gordonii	34
group_12767	0.05	0.833333	-0.783333	0.000525561	0.0415194	More in Cancer	Strep. gordonii	19
group_13225	0	0.833333	-0.833333	9.12131e-05	0.0174687	More in Cancer	Strep. gordonii	11
group_13249	0.1	1	-0.9	0.000121618	0.0174687	More in Cancer	Strep. gordonii	2
group_13341	0.95	0.166667	0.783333	0.000525561	0.0415194	More in Healthy	Strep. gordonii	12
group_14017	0	0.666667	-0.666667	0.00100334	0.0428455	More in Cancer	Strep. gordonii	25
group_14236	1	0.333333	0.666667	0.00100334	0.0428455	More in Healthy	Strep. gordonii	27
group_14517	0.05	0.833333	-0.783333	0.000525561	0.0415194	More in Cancer	Strep. gordonii	15
group_14733	0.05	0.833333	-0.783333	0.000525561	0.0415194	More in Cancer	Strep. gordonii	18
group_14734	0.05	0.833333	-0.783333	0.000525561	0.0415194	More in Cancer	Strep. gordonii	17
group_15591	0.05	0.833333	-0.783333	0.000525561	0.0415194	More in Cancer	Strep. gordonii	20
group_15717	0.05	0.833333	-0.783333	0.000525561	0.0415194	More in Cancer	Strep. gordonii	16
group_16574	0	0.666667	-0.666667	0.00100334	0.0428455	More in Cancer	Strep. gordonii	26
group_17785	0	0.666667	-0.666667	0.00100334	0.0428455	More in Cancer	Strep. gordonii	35
group_17799	0	0.666667	-0.666667	0.00100334	0.0428455	More in Cancer	Strep. gordonii	32
group_2184	0	0.666667	-0.666667	0.00100334	0.0428455	More in Cancer	Strep. gordonii	36
group_39	0.1	1	-0.9	0.000121618	0.0174687	More in Cancer	Strep. gordonii	10
group_7151	0.9	0	0.9	0.000121618	0.0174687	More in Healthy	Strep. gordonii	8
group_8279	0	0.666667	-0.666667	0.00100334	0.0428455	More in Cancer	Strep. gordonii	21
group_8665	0	0.833333	-0.833333	9.12131e-05	0.0174687	More in Cancer	Strep. gordonii	9
group_9947	0	0.666667	-0.666667	0.00100334	0.0428455	More in Cancer	Strep. gordonii	37
lacA...lacB	0.15	1	-0.85	0.000364853	0.0415194	More in Cancer	Strep. gordonii	13
lacC1...lacC	0.1	1	-0.9	0.000121618	0.0174687	More in Cancer	Strep. gordonii	7
lacE...celB	0.1	1	-0.9	0.000121618	0.0174687	More in Cancer	Strep. gordonii	3
lacF	0.1	1	-0.9	0.000121618	0.0174687	More in Cancer	Strep. gordonii	4
lacT...bglG	0.1	1	-0.9	0.000121618	0.0174687	More in Cancer	Strep. gordonii	1
rpsG	1	0.333333	0.666667	0.00100334	0.0428455	More in Healthy	Strep. gordonii	31
tnp...tnpA	0	0.666667	-0.666667	0.00100334	0.0428455	More in Cancer	Strep. gordonii	23
xerC...xerS	0	0.666667	-0.666667	0.00100334	0.0428455	More in Cancer	Strep. gordonii	22
yobL	0	0.666667	-0.666667	0.00100334	0.0428455	More in Cancer	Strep. gordonii	29

## Sheet: Strep__anginosus
Supplementary Table S6: Streptococcus anginosus gene-specific enrichment
Gene	Freq_Healthy	Freq_Cancer	Freq_Diff	PValue	AdjPValue	Group	Species	Rank
group_6215	0	1	-1	2.97101e-07	0.000105025	More in Cancer	Strep. anginosus	1
group_4022	0	1	-1	2.97101e-07	0.000105025	More in Cancer	Strep. anginosus	2
group_4000	0	1	-1	2.97101e-07	0.000105025	More in Cancer	Strep. anginosus	3
group_5958	0	1	-1	2.97101e-07	0.000105025	More in Cancer	Strep. anginosus	4
group_3584	0	1	-1	2.97101e-07	0.000105025	More in Cancer	Strep. anginosus	5
group_613	0	1	-1	2.97101e-07	0.000105025	More in Cancer	Strep. anginosus	6
group_3502	0	1	-1	2.97101e-07	0.000105025	More in Cancer	Strep. anginosus	7
group_5916	0	1	-1	2.97101e-07	0.000105025	More in Cancer	Strep. anginosus	8
group_1155	0.04	1	-0.96	2.37681e-06	0.000746847	More in Cancer	Strep. anginosus	9
group_5903	0	0.857143	-0.857143	7.72463e-06	0.00218453	More in Cancer	Strep. anginosus	10
group_6220	0.08	1	-0.92	1.06956e-05	0.00252061	More in Cancer	Strep. anginosus	11
group_4248	0.08	1	-0.92	1.06956e-05	0.00252061	More in Cancer	Strep. anginosus	12
group_15936	0.04	0.857143	-0.817143	5.22898e-05	0.0105625	More in Cancer	Strep. anginosus	13
group_15935	0.04	0.857143	-0.817143	5.22898e-05	0.0105625	More in Cancer	Strep. anginosus	14
group_14498	0	0.714286	-0.714286	0.000104283	0.0163839	More in Cancer	Strep. anginosus	15
group_10637	0.16	1	-0.84	9.80434e-05	0.0163839	More in Cancer	Strep. anginosus	16
group_2004	0	0.714286	-0.714286	0.000104283	0.0163839	More in Cancer	Strep. anginosus	17
group_75	0	0.714286	-0.714286	0.000104283	0.0163839	More in Cancer	Strep. anginosus	18

## Sheet: Strep__mitis
Supplementary Table S7: Streptococcus mitis gene-specific enrichment
Gene	Freq_Healthy	Freq_Cancer	Freq_Diff	PValue	AdjPValue	Group	Species	Rank
acnR	0.606061	0	0.606061	6.4951e-05	0.00130251	More in Healthy	Strep. mitis	217
acpA...acpB	0.272727	0.857143	-0.584416	0.000323706	0.00558923	More in Cancer	Strep. mitis	259
adhP	0.30303	1	-0.69697	8.13258e-06	0.000374937	More in Cancer	Strep. mitis	49
alaS	0.515152	0	0.515152	0.000580819	0.00846066	More in Healthy	Strep. mitis	281
aliA	0.30303	1	-0.69697	8.13258e-06	0.000374937	More in Cancer	Strep. mitis	65
aliA...sarA	0.181818	0.642857	-0.461039	0.00466659	0.0431305	More in Cancer	Strep. mitis	484
arcD...yfcC	0.606061	0	0.606061	6.4951e-05	0.00130251	More in Healthy	Strep. mitis	123
atpD	0	0.285714	-0.285714	0.00561209	0.0448165	More in Cancer	Strep. mitis	547
bglH...ascB	0.242424	0.785714	-0.54329	0.000900181	0.0126991	More in Cancer	Strep. mitis	316
blpY	0.818182	0	0.818182	1.13452e-07	7.24793e-05	More in Healthy	Strep. mitis	7
blpY...ydiL	0.181818	0.928571	-0.746753	2.25768e-06	0.000248761	More in Cancer	Strep. mitis	36
blpZ	0.333333	1	-0.666667	1.39829e-05	0.000595538	More in Cancer	Strep. mitis	104
cadD	0.515152	0	0.515152	0.000580819	0.00846066	More in Healthy	Strep. mitis	288
cadX	0.515152	0	0.515152	0.000580819	0.00846066	More in Healthy	Strep. mitis	289
cas3	0.484848	0	0.484848	0.00157372	0.0165983	More in Healthy	Strep. mitis	373
cas5e	0.484848	0	0.484848	0.00157372	0.0165983	More in Healthy	Strep. mitis	377
cas6e	0.484848	0	0.484848	0.00157372	0.0165983	More in Healthy	Strep. mitis	374
cas7e	0.484848	0	0.484848	0.00157372	0.0165983	More in Healthy	Strep. mitis	372
casA	0.484848	0	0.484848	0.00157372	0.0165983	More in Healthy	Strep. mitis	375
casB	0.484848	0	0.484848	0.00157372	0.0165983	More in Healthy	Strep. mitis	376
cbbX	0.575758	0	0.575758	0.00017543	0.00328252	More in Healthy	Strep. mitis	236
cbpD2	0.69697	0	0.69697	8.13258e-06	0.000374937	More in Healthy	Strep. mitis	64
cdd	0.424242	1	-0.575758	0.00017543	0.00328252	More in Cancer	Strep. mitis	229
citS...yesM	0.333333	1	-0.666667	1.39829e-05	0.000595538	More in Cancer	Strep. mitis	103
clcA...clcB	0.242424	1	-0.757576	9.35975e-07	0.000155025	More in Cancer	Strep. mitis	26
comM	0.69697	0	0.69697	8.13258e-06	0.000374937	More in Healthy	Strep. mitis	92
comX2	0.545455	0	0.545455	0.000249814	0.00446867	More in Healthy	Strep. mitis	250
cshA	0.606061	0	0.606061	6.4951e-05	0.00130251	More in Healthy	Strep. mitis	150
dapA	0	0.285714	-0.285714	0.00561209	0.0448165	More in Cancer	Strep. mitis	513
dhaQ	0.121212	0.785714	-0.664502	2.04876e-05	0.000832913	More in Cancer	Strep. mitis	109
dpnI	0	0.285714	-0.285714	0.00561209	0.0448165	More in Cancer	Strep. mitis	505
ebgC	0	0.285714	-0.285714	0.00561209	0.0448165	More in Cancer	Strep. mitis	530
ecfT...mtsC...cbiQ	0.30303	1	-0.69697	8.13258e-06	0.000374937	More in Cancer	Strep. mitis	50
femA...murN...fmhB	0.151515	0.642857	-0.491342	0.00151662	0.0165983	More in Cancer	Strep. mitis	355
fmhB	0.030303	0.357143	-0.32684	0.00643246	0.0493413	More in Cancer	Strep. mitis	561
ftsQ...divIB	0.30303	1	-0.69697	8.13258e-06	0.000374937	More in Cancer	Strep. mitis	89
fucO...gldA	0.69697	0.214286	0.482684	0.00364727	0.0361654	More in Healthy	Strep. mitis	450
galA	0.030303	0.5	-0.469697	0.000369713	0.00594732	More in Cancer	Strep. mitis	265
glf	0.0606061	0.428571	-0.367965	0.005412	0.0448165	More in Cancer	Strep. mitis	500
group_10166	0.606061	0	0.606061	6.4951e-05	0.00130251	More in Healthy	Strep. mitis	153
group_10252	0.181818	0.857143	-0.675325	2.27972e-05	0.000910259	More in Cancer	Strep. mitis	111
group_10262	0.181818	0.642857	-0.461039	0.00466659	0.0431305	More in Cancer	Strep. mitis	480
group_10300	0.515152	0	0.515152	0.000580819	0.00846066	More in Healthy	Strep. mitis	286
group_10302	0.606061	0.142857	0.463203	0.00446922	0.042344	More in Healthy	Strep. mitis	464
group_10309	0.606061	0	0.606061	6.4951e-05	0.00130251	More in Healthy	Strep. mitis	138
group_10319	0.30303	1	-0.69697	8.13258e-06	0.000374937	More in Cancer	Strep. mitis	86
group_10344	0.151515	0.714286	-0.562771	0.000336571	0.00574483	More in Cancer	Strep. mitis	262
group_10358	0.393939	0	0.393939	0.0046969	0.0431305	More in Healthy	Strep. mitis	487
group_10384	0.515152	0	0.515152	0.000580819	0.00846066	More in Healthy	Strep. mitis	296
group_10423	0.484848	0	0.484848	0.00157372	0.0165983	More in Healthy	Strep. mitis	416
group_10447	0.606061	0	0.606061	6.4951e-05	0.00130251	More in Healthy	Strep. mitis	209
group_10464	0.0909091	0.5	-0.409091	0.00393538	0.0380931	More in Cancer	Strep. mitis	460
group_10491	0	0.285714	-0.285714	0.00561209	0.0448165	More in Cancer	Strep. mitis	540
group_10504	0.121212	0.571429	-0.450216	0.00257115	0.026073	More in Cancer	Strep. mitis	435
group_10506	0.606061	0	0.606061	6.4951e-05	0.00130251	More in Healthy	Strep. mitis	199
group_10557	0	0.357143	-0.357143	0.00130514	0.0165812	More in Cancer	Strep. mitis	338
group_10559	0.030303	0.357143	-0.32684	0.00643246	0.0493413	More in Cancer	Strep. mitis	574
group_10579	0.606061	0.142857	0.463203	0.00446922	0.042344	More in Healthy	Strep. mitis	471
group_10596	0.69697	0	0.69697	8.13258e-06	0.000374937	More in Healthy	Strep. mitis	69
group_10633	0	0.357143	-0.357143	0.00130514	0.0165812	More in Cancer	Strep. mitis	337
group_10684	0.666667	0.142857	0.52381	0.00134883	0.0165983	More in Healthy	Strep. mitis	384
group_10685	0.666667	0.142857	0.52381	0.00134883	0.0165983	More in Healthy	Strep. mitis	379
group_10747	0.606061	0	0.606061	6.4951e-05	0.00130251	More in Healthy	Strep. mitis	142
group_10769	0.606061	0	0.606061	6.4951e-05	0.00130251	More in Healthy	Strep. mitis	190
group_10770	0.606061	0	0.606061	6.4951e-05	0.00130251	More in Healthy	Strep. mitis	185
group_10791	0.606061	0.0714286	0.534632	0.000963005	0.0132509	More in Healthy	Strep. mitis	323
group_10794	0	0.285714	-0.285714	0.00561209	0.0448165	More in Cancer	Strep. mitis	516
group_10828	0.666667	0.142857	0.52381	0.00134883	0.0165983	More in Healthy	Strep. mitis	378
group_10830	0.0909091	0.5	-0.409091	0.00393538	0.0380931	More in Cancer	Strep. mitis	459
group_10835	0.333333	0.857143	-0.52381	0.00134883	0.0165983	More in Cancer	Strep. mitis	359
group_10847	0.606061	0.0714286	0.534632	0.000963005	0.0132509	More in Healthy	Strep. mitis	324
group_10875	0.69697	0.142857	0.554113	0.000953078	0.0132509	More in Healthy	Strep. mitis	318
group_10911	0.484848	0	0.484848	0.00157372	0.0165983	More in Healthy	Strep. mitis	397
group_10931	0.666667	0	0.666667	1.39829e-05	0.000595538	More in Healthy	Strep. mitis	105
group_10944	0.606061	0	0.606061	6.4951e-05	0.00130251	More in Healthy	Strep. mitis	218
group_10945	0.484848	0	0.484848	0.00157372	0.0165983	More in Healthy	Strep. mitis	364
group_11007	0.212121	1	-0.787879	3.40355e-07	8.95333e-05	More in Cancer	Strep. mitis	16
group_11010	0.030303	0.5	-0.469697	0.000369713	0.00594732	More in Cancer	Strep. mitis	277
group_11046	0.606061	0	0.606061	6.4951e-05	0.00130251	More in Healthy	Strep. mitis	124
group_11069	0.636364	0	0.636364	4.40948e-05	0.00130251	More in Healthy	Strep. mitis	197
group_11071	0	0.428571	-0.428571	0.000279672	0.00488552	More in Cancer	Strep. mitis	256
group_11092	0.30303	1	-0.69697	8.13258e-06	0.000374937	More in Cancer	Strep. mitis	78
group_11136	0.0909091	0.5	-0.409091	0.00393538	0.0380931	More in Cancer	Strep. mitis	458
group_11139	0.484848	0	0.484848	0.00157372	0.0165983	More in Healthy	Strep. mitis	391
group_11147	0	0.285714	-0.285714	0.00561209	0.0448165	More in Cancer	Strep. mitis	509
group_11148	0	0.357143	-0.357143	0.00130514	0.0165812	More in Cancer	Strep. mitis	336
group_11199	0.333333	0.857143	-0.52381	0.00134883	0.0165983	More in Cancer	Strep. mitis	362
group_11203	0.606061	0	0.606061	6.4951e-05	0.00130251	More in Healthy	Strep. mitis	175
group_11242	0.484848	0	0.484848	0.00157372	0.0165983	More in Healthy	Strep. mitis	371
group_11263	0.121212	0.571429	-0.450216	0.00257115	0.026073	More in Cancer	Strep. mitis	434
group_11297	0.515152	0	0.515152	0.000580819	0.00846066	More in Healthy	Strep. mitis	295
group_11320	0.606061	0	0.606061	6.4951e-05	0.00130251	More in Healthy	Strep. mitis	208
group_11358	0.0606061	0.5	-0.439394	0.00140403	0.0165983	More in Cancer	Strep. mitis	388
group_11379	0.606061	0	0.606061	6.4951e-05	0.00130251	More in Healthy	Strep. mitis	207
group_11425	0	0.285714	-0.285714	0.00561209	0.0448165	More in Cancer	Strep. mitis	520
group_11426	0	0.357143	-0.357143	0.00130514	0.0165812	More in Cancer	Strep. mitis	335
group_11464	0.606061	0	0.606061	6.4951e-05	0.00130251	More in Healthy	Strep. mitis	118
group_11465	0.30303	1	-0.69697	8.13258e-06	0.000374937	More in Cancer	Strep. mitis	61
group_11469	0.666667	0.142857	0.52381	0.00134883	0.0165983	More in Healthy	Strep. mitis	381
group_11491	0.515152	0	0.515152	0.000580819	0.00846066	More in Healthy	Strep. mitis	299
group_11492	0.484848	0	0.484848	0.00157372	0.0165983	More in Healthy	Strep. mitis	396
group_11519	0	0.285714	-0.285714	0.00561209	0.0448165	More in Cancer	Strep. mitis	497
group_11522	0.030303	0.357143	-0.32684	0.00643246	0.0493413	More in Cancer	Strep. mitis	570
group_11526	0.606061	0	0.606061	6.4951e-05	0.00130251	More in Healthy	Strep. mitis	172
group_11528	0.606061	0	0.606061	6.4951e-05	0.00130251	More in Healthy	Strep. mitis	152
group_11540	0.030303	0.428571	-0.398268	0.00163028	0.0170741	More in Cancer	Strep. mitis	426
group_11541	0.636364	0.0714286	0.564935	0.000385253	0.00617509	More in Healthy	Strep. mitis	279
group_11543	0.606061	0	0.606061	6.4951e-05	0.00130251	More in Healthy	Strep. mitis	189
group_11587	0.0909091	0.714286	-0.623377	4.02103e-05	0.00130251	More in Cancer	Strep. mitis	149
group_11600	0.151515	0.642857	-0.491342	0.00151662	0.0165983	More in Cancer	Strep. mitis	387
group_11604	0.787879	0.214286	0.573593	0.000590182	0.00856914	More in Healthy	Strep. mitis	308
group_1162	0.606061	0	0.606061	6.4951e-05	0.00130251	More in Healthy	Strep. mitis	145
group_11647	0.0909091	0.5	-0.409091	0.00393538	0.0380931	More in Cancer	Strep. mitis	455
group_11666	0.606061	0	0.606061	6.4951e-05	0.00130251	More in Healthy	Strep. mitis	173
group_11671	0.515152	0	0.515152	0.000580819	0.00846066	More in Healthy	Strep. mitis	283
group_11694	0.484848	0	0.484848	0.00157372	0.0165983	More in Healthy	Strep. mitis	411
group_11723	0.515152	0	0.515152	0.000580819	0.00846066	More in Healthy	Strep. mitis	282
group_11731	0	0.5	-0.5	5.45702e-05	0.00130251	More in Cancer	Strep. mitis	216
group_11759	0.606061	0	0.606061	6.4951e-05	0.00130251	More in Healthy	Strep. mitis	202
group_11768	0.909091	0.5	0.409091	0.00393538	0.0380931	More in Healthy	Strep. mitis	452
group_11790	0.606061	0	0.606061	6.4951e-05	0.00130251	More in Healthy	Strep. mitis	121
group_11795	0.606061	0	0.606061	6.4951e-05	0.00130251	More in Healthy	Strep. mitis	117
group_11819	0.484848	0	0.484848	0.00157372	0.0165983	More in Healthy	Strep. mitis	415
group_11871	0.606061	0	0.606061	6.4951e-05	0.00130251	More in Healthy	Strep. mitis	125
group_11872	0.393939	1	-0.606061	6.4951e-05	0.00130251	More in Cancer	Strep. mitis	119
group_11918	0.181818	0.714286	-0.532468	0.000797526	0.0113223	More in Cancer	Strep. mitis	315
group_11967	0.0606061	0.428571	-0.367965	0.005412	0.0448165	More in Cancer	Strep. mitis	504
group_12004	0.030303	0.357143	-0.32684	0.00643246	0.0493413	More in Cancer	Strep. mitis	573
group_12056	0.515152	0	0.515152	0.000580819	0.00846066	More in Healthy	Strep. mitis	285
group_12092	0.606061	0	0.606061	6.4951e-05	0.00130251	More in Healthy	Strep. mitis	120
group_12159	0.484848	0	0.484848	0.00157372	0.0165983	More in Healthy	Strep. mitis	406
group_12193	0.0909091	0.571429	-0.480519	0.00100331	0.0136793	More in Cancer	Strep. mitis	328
group_12194	0.878788	0.142857	0.735931	2.52831e-06	0.000251257	More in Healthy	Strep. mitis	44
group_12195	0.121212	0.857143	-0.735931	2.52831e-06	0.000251257	More in Cancer	Strep. mitis	45
group_12267	0.030303	0.357143	-0.32684	0.00643246	0.0493413	More in Cancer	Strep. mitis	567
group_12272	0.69697	0	0.69697	8.13258e-06	0.000374937	More in Healthy	Strep. mitis	83
group_12281	0.030303	0.357143	-0.32684	0.00643246	0.0493413	More in Cancer	Strep. mitis	581
group_12291	0.030303	0.357143	-0.32684	0.00643246	0.0493413	More in Cancer	Strep. mitis	580
group_12315	0.484848	0	0.484848	0.00157372	0.0165983	More in Healthy	Strep. mitis	421
group_12338	0.878788	0.428571	0.450216	0.00257115	0.026073	More in Healthy	Strep. mitis	431
group_12340	0.030303	0.357143	-0.32684	0.00643246	0.0493413	More in Cancer	Strep. mitis	579
group_12347	0.848485	0.285714	0.562771	0.000336571	0.00574483	More in Healthy	Strep. mitis	260
group_12411	0.484848	0	0.484848	0.00157372	0.0165983	More in Healthy	Strep. mitis	394
group_12422	0.30303	0.785714	-0.482684	0.00364727	0.0361654	More in Cancer	Strep. mitis	447
group_12478	0	0.285714	-0.285714	0.00561209	0.0448165	More in Cancer	Strep. mitis	507
group_1249	0.484848	0	0.484848	0.00157372	0.0165983	More in Healthy	Strep. mitis	409
group_12510	0.212121	0.857143	-0.645022	5.80078e-05	0.00130251	More in Cancer	Strep. mitis	129
group_12554	0.484848	0	0.484848	0.00157372	0.0165983	More in Healthy	Strep. mitis	399
group_12620	0.69697	0	0.69697	8.13258e-06	0.000374937	More in Healthy	Strep. mitis	68
group_12674	0.0909091	0.5	-0.409091	0.00393538	0.0380931	More in Cancer	Strep. mitis	457
group_12676	0.030303	0.642857	-0.612554	1.29521e-05	0.000579219	More in Cancer	Strep. mitis	100
group_12761	0.848485	0.357143	0.491342	0.00151662	0.0165983	More in Healthy	Strep. mitis	361
group_12795	0.575758	0	0.575758	0.00017543	0.00328252	More in Healthy	Strep. mitis	238
group_12809	0.030303	0.357143	-0.32684	0.00643246	0.0493413	More in Cancer	Strep. mitis	565
group_12814	0.363636	1	-0.636364	4.40948e-05	0.00130251	More in Cancer	Strep. mitis	113
group_12829	0.848485	0.142857	0.705628	8.08989e-06	0.000374937	More in Healthy	Strep. mitis	52
group_12846	0	0.357143	-0.357143	0.00130514	0.0165812	More in Cancer	Strep. mitis	346
group_12887	0	0.357143	-0.357143	0.00130514	0.0165812	More in Cancer	Strep. mitis	345
group_12900	0.636364	0.142857	0.493506	0.00335136	0.0336038	More in Healthy	Strep. mitis	445
group_12902	0.0606061	0.428571	-0.367965	0.005412	0.0448165	More in Cancer	Strep. mitis	515
group_12909	0.151515	0.714286	-0.562771	0.000336571	0.00574483	More in Cancer	Strep. mitis	261
group_12934	0.69697	0	0.69697	8.13258e-06	0.000374937	More in Healthy	Strep. mitis	54
group_12945	0.606061	0	0.606061	6.4951e-05	0.00130251	More in Healthy	Strep. mitis	135
group_12946	0.606061	0	0.606061	6.4951e-05	0.00130251	More in Healthy	Strep. mitis	141
group_12974	0.636364	0	0.636364	4.40948e-05	0.00130251	More in Healthy	Strep. mitis	144
group_12991	0.0606061	0.428571	-0.367965	0.005412	0.0448165	More in Cancer	Strep. mitis	514
group_13024	0.69697	0	0.69697	8.13258e-06	0.000374937	More in Healthy	Strep. mitis	71
group_13030	0.515152	1	-0.484848	0.00157372	0.0165983	More in Cancer	Strep. mitis	353
group_13060	0.818182	0.357143	0.461039	0.00466659	0.0431305	More in Healthy	Strep. mitis	475
group_13063	0.0909091	0.5	-0.409091	0.00393538	0.0380931	More in Cancer	Strep. mitis	462
group_13120	0.666667	0.142857	0.52381	0.00134883	0.0165983	More in Healthy	Strep. mitis	368
group_13121	0.484848	0	0.484848	0.00157372	0.0165983	More in Healthy	Strep. mitis	385
group_13138	0.757576	0	0.757576	9.35975e-07	0.000155025	More in Healthy	Strep. mitis	27
group_13249	0.363636	1	-0.636364	4.40948e-05	0.00130251	More in Cancer	Strep. mitis	114
group_13251	0.151515	0.642857	-0.491342	0.00151662	0.0165983	More in Cancer	Strep. mitis	390
group_13262	0.848485	0.357143	0.491342	0.00151662	0.0165983	More in Healthy	Strep. mitis	358
group_13288	0.030303	0.428571	-0.398268	0.00163028	0.0170741	More in Cancer	Strep. mitis	425
group_13302	0.212121	1	-0.787879	3.40355e-07	8.95333e-05	More in Cancer	Strep. mitis	12
group_13303	0.69697	0.142857	0.554113	0.000953078	0.0132509	More in Healthy	Strep. mitis	319
group_13340	0.69697	0	0.69697	8.13258e-06	0.000374937	More in Healthy	Strep. mitis	76
group_13351	0.69697	0	0.69697	8.13258e-06	0.000374937	More in Healthy	Strep. mitis	62
group_13381	0.030303	0.357143	-0.32684	0.00643246	0.0493413	More in Cancer	Strep. mitis	576
group_13394	0.69697	0	0.69697	8.13258e-06	0.000374937	More in Healthy	Strep. mitis	75
group_13400	0	0.357143	-0.357143	0.00130514	0.0165812	More in Cancer	Strep. mitis	340
group_13401	0	0.357143	-0.357143	0.00130514	0.0165812	More in Cancer	Strep. mitis	334
group_13433	0.484848	0	0.484848	0.00157372	0.0165983	More in Healthy	Strep. mitis	392
group_13450	0.69697	0	0.69697	8.13258e-06	0.000374937	More in Healthy	Strep. mitis	48
group_13463	0.0606061	0.928571	-0.867965	9.87871e-09	1.47259e-05	More in Cancer	Strep. mitis	3
group_13465	0	0.357143	-0.357143	0.00130514	0.0165812	More in Cancer	Strep. mitis	339
group_13469	0.636364	0	0.636364	4.40948e-05	0.00130251	More in Healthy	Strep. mitis	143
group_13528	1	0.714286	0.285714	0.00561209	0.0448165	More in Healthy	Strep. mitis	489
group_1353	0.515152	0	0.515152	0.000580819	0.00846066	More in Healthy	Strep. mitis	305
group_13535	0	0.285714	-0.285714	0.00561209	0.0448165	More in Cancer	Strep. mitis	496
group_13592	0.151515	0.928571	-0.777056	7.36241e-07	0.000143151	More in Cancer	Strep. mitis	22
group_13593	0	0.357143	-0.357143	0.00130514	0.0165812	More in Cancer	Strep. mitis	330
group_13598	0.878788	0.357143	0.521645	0.000622551	0.00892323	More in Healthy	Strep. mitis	309
group_13610	0	0.357143	-0.357143	0.00130514	0.0165812	More in Cancer	Strep. mitis	329
group_13638	0.484848	0	0.484848	0.00157372	0.0165983	More in Healthy	Strep. mitis	402
group_13653	0.030303	0.857143	-0.82684	2.14463e-08	2.3977e-05	More in Cancer	Strep. mitis	4
group_13654	0	0.642857	-0.642857	1.4692e-06	0.000234652	More in Cancer	Strep. mitis	28
group_13662	0.454545	1	-0.545455	0.000249814	0.00446867	More in Cancer	Strep. mitis	245
group_13666	0.787879	0	0.787879	3.40355e-07	8.95333e-05	More in Healthy	Strep. mitis	13
group_13673	0	0.357143	-0.357143	0.00130514	0.0165812	More in Cancer	Strep. mitis	331
group_13705	0.575758	0	0.575758	0.00017543	0.00328252	More in Healthy	Strep. mitis	232
group_13721	0.69697	0	0.69697	8.13258e-06	0.000374937	More in Healthy	Strep. mitis	74
group_13723	0.484848	0	0.484848	0.00157372	0.0165983	More in Healthy	Strep. mitis	356
group_13744	0.515152	0	0.515152	0.000580819	0.00846066	More in Healthy	Strep. mitis	306
group_13749	0.0909091	0.5	-0.409091	0.00393538	0.0380931	More in Cancer	Strep. mitis	456
group_13754	0.454545	1	-0.545455	0.000249814	0.00446867	More in Cancer	Strep. mitis	244
group_13795	0.0909091	0.857143	-0.766234	6.7045e-07	0.000143151	More in Cancer	Strep. mitis	23
group_13800	0.878788	0.357143	0.521645	0.000622551	0.00892323	More in Healthy	Strep. mitis	310
group_13821	0.484848	0	0.484848	0.00157372	0.0165983	More in Healthy	Strep. mitis	365
group_13837	0.393939	0	0.393939	0.0046969	0.0431305	More in Healthy	Strep. mitis	476
group_1387	0.121212	0.571429	-0.450216	0.00257115	0.026073	More in Cancer	Strep. mitis	439
group_13875	0.393939	0	0.393939	0.0046969	0.0431305	More in Healthy	Strep. mitis	479
group_13879	0.0606061	0.714286	-0.65368	1.03467e-05	0.000467379	More in Cancer	Strep. mitis	99
group_13906	0.545455	0	0.545455	0.000249814	0.00446867	More in Healthy	Strep. mitis	247
group_13907	0.575758	0	0.575758	0.00017543	0.00328252	More in Healthy	Strep. mitis	231
group_13931	0.666667	0.0714286	0.595238	0.000256546	0.00451683	More in Healthy	Strep. mitis	254
group_13976	0.181818	0.642857	-0.461039	0.00466659	0.0431305	More in Cancer	Strep. mitis	486
group_13983	1	0.714286	0.285714	0.00561209	0.0448165	More in Healthy	Strep. mitis	492
group_13994	0.393939	1	-0.606061	6.4951e-05	0.00130251	More in Cancer	Strep. mitis	122
group_13996	0.030303	0.357143	-0.32684	0.00643246	0.0493413	More in Cancer	Strep. mitis	566
group_14015	0.484848	0	0.484848	0.00157372	0.0165983	More in Healthy	Strep. mitis	400
group_14032	0.757576	0	0.757576	9.35975e-07	0.000155025	More in Healthy	Strep. mitis	25
group_14034	0.606061	0	0.606061	6.4951e-05	0.00130251	More in Healthy	Strep. mitis	219
group_14038	0.69697	0	0.69697	8.13258e-06	0.000374937	More in Healthy	Strep. mitis	67
group_1408	0	0.285714	-0.285714	0.00561209	0.0448165	More in Cancer	Strep. mitis	560
group_14085	0.393939	0.857143	-0.463203	0.00446922	0.042344	More in Cancer	Strep. mitis	463
group_1409	0	0.285714	-0.285714	0.00561209	0.0448165	More in Cancer	Strep. mitis	558
group_14113	0	0.357143	-0.357143	0.00130514	0.0165812	More in Cancer	Strep. mitis	332
group_14119	0.727273	0	0.727273	2.39194e-06	0.000248761	More in Healthy	Strep. mitis	40
group_14120	0.030303	0.357143	-0.32684	0.00643246	0.0493413	More in Cancer	Strep. mitis	568
group_14126	0	0.5	-0.5	5.45702e-05	0.00130251	More in Cancer	Strep. mitis	195
group_14128	0.424242	1	-0.575758	0.00017543	0.00328252	More in Cancer	Strep. mitis	230
group_14165	0	0.357143	-0.357143	0.00130514	0.0165812	More in Cancer	Strep. mitis	333
group_14171	0.69697	0	0.69697	8.13258e-06	0.000374937	More in Healthy	Strep. mitis	96
group_14192	0.606061	0	0.606061	6.4951e-05	0.00130251	More in Healthy	Strep. mitis	137
group_14211	0	0.285714	-0.285714	0.00561209	0.0448165	More in Cancer	Strep. mitis	501
group_14218	0	0.285714	-0.285714	0.00561209	0.0448165	More in Cancer	Strep. mitis	519
group_14240	0.848485	0.0714286	0.777056	7.36241e-07	0.000143151	More in Healthy	Strep. mitis	18
group_14280	0	0.285714	-0.285714	0.00561209	0.0448165	More in Cancer	Strep. mitis	503
group_14319	0	0.428571	-0.428571	0.000279672	0.00488552	More in Cancer	Strep. mitis	255
group_14320	0.575758	0	0.575758	0.00017543	0.00328252	More in Healthy	Strep. mitis	233
group_14379	0.0606061	0.428571	-0.367965	0.005412	0.0448165	More in Cancer	Strep. mitis	518
group_14392	0	0.285714	-0.285714	0.00561209	0.0448165	More in Cancer	Strep. mitis	502
group_14411	0.30303	1	-0.69697	8.13258e-06	0.000374937	More in Cancer	Strep. mitis	51
group_14523	0.484848	0	0.484848	0.00157372	0.0165983	More in Healthy	Strep. mitis	410
group_14524	0.515152	0	0.515152	0.000580819	0.00846066	More in Healthy	Strep. mitis	302
group_14580	0.0606061	0.5	-0.439394	0.00140403	0.0165983	More in Cancer	Strep. mitis	366
group_14585	0.69697	0	0.69697	8.13258e-06	0.000374937	More in Healthy	Strep. mitis	73
group_14610	1	0.714286	0.285714	0.00561209	0.0448165	More in Healthy	Strep. mitis	488
group_14633	0	0.285714	-0.285714	0.00561209	0.0448165	More in Cancer	Strep. mitis	553
group_14690	0.606061	0	0.606061	6.4951e-05	0.00130251	More in Healthy	Strep. mitis	154
group_14693	0.0606061	0.428571	-0.367965	0.005412	0.0448165	More in Cancer	Strep. mitis	522
group_14767	0.606061	0.142857	0.463203	0.00446922	0.042344	More in Healthy	Strep. mitis	465
group_14782	0.0909091	0.642857	-0.551948	0.000219392	0.00407104	More in Cancer	Strep. mitis	241
group_14819	0.606061	0	0.606061	6.4951e-05	0.00130251	More in Healthy	Strep. mitis	151
group_14844	0.69697	0.214286	0.482684	0.00364727	0.0361654	More in Healthy	Strep. mitis	448
group_14873	1	0.714286	0.285714	0.00561209	0.0448165	More in Healthy	Strep. mitis	491
group_14878	0.212121	1	-0.787879	3.40355e-07	8.95333e-05	More in Cancer	Strep. mitis	10
group_14882	0.212121	1	-0.787879	3.40355e-07	8.95333e-05	More in Cancer	Strep. mitis	9
group_14900	0.69697	0	0.69697	8.13258e-06	0.000374937	More in Healthy	Strep. mitis	47
group_14924	0.393939	0	0.393939	0.0046969	0.0431305	More in Healthy	Strep. mitis	478
group_14936	0.484848	0	0.484848	0.00157372	0.0165983	More in Healthy	Strep. mitis	357
group_14939	0.454545	1	-0.545455	0.000249814	0.00446867	More in Cancer	Strep. mitis	242
group_14976	0.606061	0	0.606061	6.4951e-05	0.00130251	More in Healthy	Strep. mitis	136
group_14997	0.727273	0	0.727273	2.39194e-06	0.000248761	More in Healthy	Strep. mitis	35
group_15027	0.030303	0.5	-0.469697	0.000369713	0.00594732	More in Cancer	Strep. mitis	269
group_15191	0.030303	0.357143	-0.32684	0.00643246	0.0493413	More in Cancer	Strep. mitis	578
group_15196	0.69697	0	0.69697	8.13258e-06	0.000374937	More in Healthy	Strep. mitis	72
group_15206	0.181818	0.642857	-0.461039	0.00466659	0.0431305	More in Cancer	Strep. mitis	473
group_15226	0.0909091	0.714286	-0.623377	4.02103e-05	0.00130251	More in Cancer	Strep. mitis	147
group_15284	0.030303	0.5	-0.469697	0.000369713	0.00594732	More in Cancer	Strep. mitis	264
group_15289	0	0.285714	-0.285714	0.00561209	0.0448165	More in Cancer	Strep. mitis	495
group_15335	0	0.285714	-0.285714	0.00561209	0.0448165	More in Cancer	Strep. mitis	494
group_15340	0.727273	0.214286	0.512987	0.00280659	0.028332	More in Healthy	Strep. mitis	442
group_15360	0.515152	0	0.515152	0.000580819	0.00846066	More in Healthy	Strep. mitis	303
group_15373	0.393939	0	0.393939	0.0046969	0.0431305	More in Healthy	Strep. mitis	477
group_15375	0.484848	0	0.484848	0.00157372	0.0165983	More in Healthy	Strep. mitis	405
group_15404	0.393939	0	0.393939	0.0046969	0.0431305	More in Healthy	Strep. mitis	474
group_15415	0.909091	0.5	0.409091	0.00393538	0.0380931	More in Healthy	Strep. mitis	453
group_15462	0.484848	0	0.484848	0.00157372	0.0165983	More in Healthy	Strep. mitis	398
group_15474	0.69697	0.0714286	0.625541	8.85016e-05	0.00174352	More in Healthy	Strep. mitis	225
group_15497	0.212121	0.857143	-0.645022	5.80078e-05	0.00130251	More in Cancer	Strep. mitis	130
group_15518	0	0.285714	-0.285714	0.00561209	0.0448165	More in Cancer	Strep. mitis	526
group_15525	0.030303	0.357143	-0.32684	0.00643246	0.0493413	More in Cancer	Strep. mitis	562
group_15531	0.121212	0.785714	-0.664502	2.04876e-05	0.000832913	More in Cancer	Strep. mitis	106
group_15615	0.484848	0	0.484848	0.00157372	0.0165983	More in Healthy	Strep. mitis	395
group_15637	0.636364	0	0.636364	4.40948e-05	0.00130251	More in Healthy	Strep. mitis	171
group_15647	0.484848	0	0.484848	0.00157372	0.0165983	More in Healthy	Strep. mitis	404
group_15682	0.121212	0.785714	-0.664502	2.04876e-05	0.000832913	More in Cancer	Strep. mitis	108
group_15702	0.121212	0.785714	-0.664502	2.04876e-05	0.000832913	More in Cancer	Strep. mitis	107
group_15715	0.515152	0	0.515152	0.000580819	0.00846066	More in Healthy	Strep. mitis	280
group_15843	0	0.285714	-0.285714	0.00561209	0.0448165	More in Cancer	Strep. mitis	552
group_15903	0	0.285714	-0.285714	0.00561209	0.0448165	More in Cancer	Strep. mitis	521
group_16064	0	0.285714	-0.285714	0.00561209	0.0448165	More in Cancer	Strep. mitis	506
group_16219	0.606061	0	0.606061	6.4951e-05	0.00130251	More in Healthy	Strep. mitis	133
group_16302	0	0.285714	-0.285714	0.00561209	0.0448165	More in Cancer	Strep. mitis	538
group_16349	0.030303	0.357143	-0.32684	0.00643246	0.0493413	More in Cancer	Strep. mitis	575
group_16428	0.393939	1	-0.606061	6.4951e-05	0.00130251	More in Cancer	Strep. mitis	116
group_16429	0.242424	1	-0.757576	9.35975e-07	0.000155025	More in Cancer	Strep. mitis	24
group_16525	0.515152	0	0.515152	0.000580819	0.00846066	More in Healthy	Strep. mitis	298
group_16571	0	0.357143	-0.357143	0.00130514	0.0165812	More in Cancer	Strep. mitis	343
group_16667	0.030303	0.357143	-0.32684	0.00643246	0.0493413	More in Cancer	Strep. mitis	577
group_17138	0.484848	0	0.484848	0.00157372	0.0165983	More in Healthy	Strep. mitis	414
group_17227	0.030303	0.714286	-0.683983	1.91748e-06	0.000248761	More in Cancer	Strep. mitis	43
group_17774	0.606061	0	0.606061	6.4951e-05	0.00130251	More in Healthy	Strep. mitis	158
group_17941	0	0.285714	-0.285714	0.00561209	0.0448165	More in Cancer	Strep. mitis	527
group_1931	0.121212	0.571429	-0.450216	0.00257115	0.026073	More in Cancer	Strep. mitis	438
group_1956	0.484848	0	0.484848	0.00157372	0.0165983	More in Healthy	Strep. mitis	419
group_1972	0	0.285714	-0.285714	0.00561209	0.0448165	More in Cancer	Strep. mitis	545
group_1973	0	0.285714	-0.285714	0.00561209	0.0448165	More in Cancer	Strep. mitis	544
group_2007	0	0.285714	-0.285714	0.00561209	0.0448165	More in Cancer	Strep. mitis	557
group_2206	0.030303	0.5	-0.469697	0.000369713	0.00594732	More in Cancer	Strep. mitis	274
group_2310	1	0.714286	0.285714	0.00561209	0.0448165	More in Healthy	Strep. mitis	493
group_24390	0	0.357143	-0.357143	0.00130514	0.0165812	More in Cancer	Strep. mitis	352
group_24391	0	0.285714	-0.285714	0.00561209	0.0448165	More in Cancer	Strep. mitis	551
group_24826	0	0.357143	-0.357143	0.00130514	0.0165812	More in Cancer	Strep. mitis	350
group_24837	0	0.357143	-0.357143	0.00130514	0.0165812	More in Cancer	Strep. mitis	351
group_24893	0	0.357143	-0.357143	0.00130514	0.0165812	More in Cancer	Strep. mitis	349
group_24939	0.030303	0.428571	-0.398268	0.00163028	0.0170741	More in Cancer	Strep. mitis	427
group_24989	0	0.285714	-0.285714	0.00561209	0.0448165	More in Cancer	Strep. mitis	535
group_24990	0	0.285714	-0.285714	0.00561209	0.0448165	More in Cancer	Strep. mitis	534
group_24991	0	0.285714	-0.285714	0.00561209	0.0448165	More in Cancer	Strep. mitis	533
group_24992	0	0.285714	-0.285714	0.00561209	0.0448165	More in Cancer	Strep. mitis	532
group_24993	0	0.285714	-0.285714	0.00561209	0.0448165	More in Cancer	Strep. mitis	531
group_25075	0	0.285714	-0.285714	0.00561209	0.0448165	More in Cancer	Strep. mitis	499
group_25079	0	0.285714	-0.285714	0.00561209	0.0448165	More in Cancer	Strep. mitis	525
group_2590	0.515152	0	0.515152	0.000580819	0.00846066	More in Healthy	Strep. mitis	307
group_2813	0.606061	0	0.606061	6.4951e-05	0.00130251	More in Healthy	Strep. mitis	215
group_2833	0.030303	0.357143	-0.32684	0.00643246	0.0493413	More in Cancer	Strep. mitis	572
group_3029	0	0.285714	-0.285714	0.00561209	0.0448165	More in Cancer	Strep. mitis	543
group_3089	0	0.285714	-0.285714	0.00561209	0.0448165	More in Cancer	Strep. mitis	542
group_3191	0.121212	0.571429	-0.450216	0.00257115	0.026073	More in Cancer	Strep. mitis	430
group_3727	0.272727	1	-0.727273	2.39194e-06	0.000248761	More in Cancer	Strep. mitis	38
group_3758	0.030303	0.357143	-0.32684	0.00643246	0.0493413	More in Cancer	Strep. mitis	563
group_3844	0.30303	1	-0.69697	8.13258e-06	0.000374937	More in Cancer	Strep. mitis	57
group_3937	0.212121	0.857143	-0.645022	5.80078e-05	0.00130251	More in Cancer	Strep. mitis	128
group_3943	0.0909091	0.714286	-0.623377	4.02103e-05	0.00130251	More in Cancer	Strep. mitis	198
group_3958	0.606061	0	0.606061	6.4951e-05	0.00130251	More in Healthy	Strep. mitis	146
group_3961	0	0.571429	-0.571429	9.54978e-06	0.000435782	More in Cancer	Strep. mitis	98
group_4012	0.030303	0.357143	-0.32684	0.00643246	0.0493413	More in Cancer	Strep. mitis	582
group_4091	0.181818	0.928571	-0.746753	2.25768e-06	0.000248761	More in Cancer	Strep. mitis	41
group_422	0	0.285714	-0.285714	0.00561209	0.0448165	More in Cancer	Strep. mitis	549
group_4230	0.606061	0	0.606061	6.4951e-05	0.00130251	More in Healthy	Strep. mitis	165
group_4232	0.030303	0.357143	-0.32684	0.00643246	0.0493413	More in Cancer	Strep. mitis	583
group_4270	0.272727	1	-0.727273	2.39194e-06	0.000248761	More in Cancer	Strep. mitis	37
group_4420	0.0909091	0.571429	-0.480519	0.00100331	0.0136793	More in Cancer	Strep. mitis	326
group_4438	0.121212	0.571429	-0.450216	0.00257115	0.026073	More in Cancer	Strep. mitis	437
group_4530	0	0.285714	-0.285714	0.00561209	0.0448165	More in Cancer	Strep. mitis	556
group_4538	0	0.285714	-0.285714	0.00561209	0.0448165	More in Cancer	Strep. mitis	523
group_456	0.484848	0	0.484848	0.00157372	0.0165983	More in Healthy	Strep. mitis	423
group_4640	0.484848	0	0.484848	0.00157372	0.0165983	More in Healthy	Strep. mitis	422
group_472	0.484848	0	0.484848	0.00157372	0.0165983	More in Healthy	Strep. mitis	413
group_4736	0	0.357143	-0.357143	0.00130514	0.0165812	More in Cancer	Strep. mitis	347
group_4860	0.30303	1	-0.69697	8.13258e-06	0.000374937	More in Cancer	Strep. mitis	90
group_4876	0.151515	0.785714	-0.634199	5.9998e-05	0.00130251	More in Cancer	Strep. mitis	193
group_4882	0.121212	0.571429	-0.450216	0.00257115	0.026073	More in Cancer	Strep. mitis	433
group_491	0.0606061	0.5	-0.439394	0.00140403	0.0165983	More in Cancer	Strep. mitis	360
group_4928	0	0.285714	-0.285714	0.00561209	0.0448165	More in Cancer	Strep. mitis	541
group_5010	0.030303	0.5	-0.469697	0.000369713	0.00594732	More in Cancer	Strep. mitis	273
group_5127	0.151515	0.642857	-0.491342	0.00151662	0.0165983	More in Cancer	Strep. mitis	383
group_5273	0.606061	0	0.606061	6.4951e-05	0.00130251	More in Healthy	Strep. mitis	181
group_5318	0.606061	0	0.606061	6.4951e-05	0.00130251	More in Healthy	Strep. mitis	206
group_5457	0.606061	0	0.606061	6.4951e-05	0.00130251	More in Healthy	Strep. mitis	214
group_5544	0.606061	0	0.606061	6.4951e-05	0.00130251	More in Healthy	Strep. mitis	204
group_5646	0	0.285714	-0.285714	0.00561209	0.0448165	More in Cancer	Strep. mitis	559
group_5675	0.606061	0	0.606061	6.4951e-05	0.00130251	More in Healthy	Strep. mitis	162
group_5848	0.484848	0	0.484848	0.00157372	0.0165983	More in Healthy	Strep. mitis	412
group_6077	0.030303	0.357143	-0.32684	0.00643246	0.0493413	More in Cancer	Strep. mitis	564
group_6113	0.30303	1	-0.69697	8.13258e-06	0.000374937	More in Cancer	Strep. mitis	56
group_6114	0.30303	1	-0.69697	8.13258e-06	0.000374937	More in Cancer	Strep. mitis	55
group_6119	0.0606061	0.571429	-0.510823	0.000319164	0.00553217	More in Cancer	Strep. mitis	258
group_6217	0.606061	0.142857	0.463203	0.00446922	0.042344	More in Healthy	Strep. mitis	472
group_6218	0.0606061	0.5	-0.439394	0.00140403	0.0165983	More in Cancer	Strep. mitis	389
group_6285	0.909091	0.5	0.409091	0.00393538	0.0380931	More in Healthy	Strep. mitis	454
group_6320	0.030303	0.357143	-0.32684	0.00643246	0.0493413	More in Cancer	Strep. mitis	569
group_6339	0.606061	0	0.606061	6.4951e-05	0.00130251	More in Healthy	Strep. mitis	211
group_6392	0.272727	0.928571	-0.655844	5.03819e-05	0.00130251	More in Cancer	Strep. mitis	183
group_6393	0.606061	0	0.606061	6.4951e-05	0.00130251	More in Healthy	Strep. mitis	192
group_6408	0.606061	0	0.606061	6.4951e-05	0.00130251	More in Healthy	Strep. mitis	210
group_6412	0.606061	0	0.606061	6.4951e-05	0.00130251	More in Healthy	Strep. mitis	194
group_6439	0.575758	0	0.575758	0.00017543	0.00328252	More in Healthy	Strep. mitis	237
group_6506	0.121212	0.571429	-0.450216	0.00257115	0.026073	More in Cancer	Strep. mitis	436
group_6550	0	0.285714	-0.285714	0.00561209	0.0448165	More in Cancer	Strep. mitis	555
group_6613	0.0606061	0.571429	-0.510823	0.000319164	0.00553217	More in Cancer	Strep. mitis	257
group_6651	0.454545	0	0.454545	0.00171647	0.0179348	More in Healthy	Strep. mitis	428
group_6675	0.30303	1	-0.69697	8.13258e-06	0.000374937	More in Cancer	Strep. mitis	91
group_6677	0	0.285714	-0.285714	0.00561209	0.0448165	More in Cancer	Strep. mitis	554
group_6868	0.121212	0.785714	-0.664502	2.04876e-05	0.000832913	More in Cancer	Strep. mitis	110
group_6873	0.30303	0.928571	-0.625541	8.85016e-05	0.00174352	More in Cancer	Strep. mitis	227
group_6874	0.515152	0	0.515152	0.000580819	0.00846066	More in Healthy	Strep. mitis	300
group_6929	0.151515	0.642857	-0.491342	0.00151662	0.0165983	More in Cancer	Strep. mitis	380
group_6935	0.606061	0	0.606061	6.4951e-05	0.00130251	More in Healthy	Strep. mitis	161
group_6947	0.0606061	0.642857	-0.582251	6.26081e-05	0.00130251	More in Cancer	Strep. mitis	203
group_6987	0.848485	0.142857	0.705628	8.08989e-06	0.000374937	More in Healthy	Strep. mitis	53
group_6991	0.69697	0	0.69697	8.13258e-06	0.000374937	More in Healthy	Strep. mitis	66
group_6992	0.212121	1	-0.787879	3.40355e-07	8.95333e-05	More in Cancer	Strep. mitis	17
group_7036	0.030303	0.571429	-0.541126	7.41944e-05	0.00148124	More in Cancer	Strep. mitis	224
group_7098	0.69697	0	0.69697	8.13258e-06	0.000374937	More in Healthy	Strep. mitis	95
group_7104	0.0909091	0.5	-0.409091	0.00393538	0.0380931	More in Cancer	Strep. mitis	461
group_7156	0.606061	0.142857	0.463203	0.00446922	0.042344	More in Healthy	Strep. mitis	469
group_7163	0.545455	0	0.545455	0.000249814	0.00446867	More in Healthy	Strep. mitis	246
group_7335	0.69697	0.142857	0.554113	0.000953078	0.0132509	More in Healthy	Strep. mitis	320
group_7411	0.848485	0.142857	0.705628	8.08989e-06	0.000374937	More in Healthy	Strep. mitis	60
group_7460	0	0.285714	-0.285714	0.00561209	0.0448165	More in Cancer	Strep. mitis	511
group_748	0	0.357143	-0.357143	0.00130514	0.0165812	More in Cancer	Strep. mitis	348
group_7519	0.69697	0.214286	0.482684	0.00364727	0.0361654	More in Healthy	Strep. mitis	451
group_7547	0.606061	0	0.606061	6.4951e-05	0.00130251	More in Healthy	Strep. mitis	160
group_7627	0.515152	0	0.515152	0.000580819	0.00846066	More in Healthy	Strep. mitis	284
group_7709	0.242424	0.857143	-0.614719	0.000194371	0.00362178	More in Cancer	Strep. mitis	240
group_7750	0.484848	0	0.484848	0.00157372	0.0165983	More in Healthy	Strep. mitis	418
group_7759	0	0.357143	-0.357143	0.00130514	0.0165812	More in Cancer	Strep. mitis	342
group_7772	0.606061	0	0.606061	6.4951e-05	0.00130251	More in Healthy	Strep. mitis	184
group_7810	0.606061	0	0.606061	6.4951e-05	0.00130251	More in Healthy	Strep. mitis	131
group_7859	0.484848	0	0.484848	0.00157372	0.0165983	More in Healthy	Strep. mitis	424
group_7880	0.30303	1	-0.69697	8.13258e-06	0.000374937	More in Cancer	Strep. mitis	80
group_7889	0.515152	0	0.515152	0.000580819	0.00846066	More in Healthy	Strep. mitis	294
group_7906	0.606061	0	0.606061	6.4951e-05	0.00130251	More in Healthy	Strep. mitis	164
group_7924	0.272727	1	-0.727273	2.39194e-06	0.000248761	More in Cancer	Strep. mitis	42
group_7954	0.515152	0	0.515152	0.000580819	0.00846066	More in Healthy	Strep. mitis	293
group_7974	0.333333	0.928571	-0.595238	0.000256546	0.00451683	More in Cancer	Strep. mitis	251
group_8006	0.212121	0.714286	-0.502165	0.00214084	0.0223167	More in Cancer	Strep. mitis	429
group_8036	0.0909091	0.571429	-0.480519	0.00100331	0.0136793	More in Cancer	Strep. mitis	327
group_8065	0.515152	0	0.515152	0.000580819	0.00846066	More in Healthy	Strep. mitis	292
group_8067	0.515152	0	0.515152	0.000580819	0.00846066	More in Healthy	Strep. mitis	297
group_8078	0.606061	0	0.606061	6.4951e-05	0.00130251	More in Healthy	Strep. mitis	134
group_8102	0.181818	0.642857	-0.461039	0.00466659	0.0431305	More in Cancer	Strep. mitis	485
group_8153	0.151515	0.642857	-0.491342	0.00151662	0.0165983	More in Cancer	Strep. mitis	386
group_8182	0.636364	0	0.636364	4.40948e-05	0.00130251	More in Healthy	Strep. mitis	148
group_8205	0.484848	0	0.484848	0.00157372	0.0165983	More in Healthy	Strep. mitis	363
group_8252	0.606061	0.142857	0.463203	0.00446922	0.042344	More in Healthy	Strep. mitis	468
group_8274	0.30303	1	-0.69697	8.13258e-06	0.000374937	More in Cancer	Strep. mitis	81
group_8302	0.606061	0	0.606061	6.4951e-05	0.00130251	More in Healthy	Strep. mitis	187
group_8348	0.393939	1	-0.606061	6.4951e-05	0.00130251	More in Cancer	Strep. mitis	139
group_835	0.606061	0	0.606061	6.4951e-05	0.00130251	More in Healthy	Strep. mitis	222
group_8350	0.181818	0.642857	-0.461039	0.00466659	0.0431305	More in Cancer	Strep. mitis	482
group_8374	0.606061	0	0.606061	6.4951e-05	0.00130251	More in Healthy	Strep. mitis	169
group_8418	0.606061	0	0.606061	6.4951e-05	0.00130251	More in Healthy	Strep. mitis	186
group_8423	0.121212	0.571429	-0.450216	0.00257115	0.026073	More in Cancer	Strep. mitis	432
group_8429	0.909091	0.142857	0.766234	6.7045e-07	0.000143151	More in Healthy	Strep. mitis	21
group_8441	0.121212	0.571429	-0.450216	0.00257115	0.026073	More in Cancer	Strep. mitis	441
group_8492	0.606061	0	0.606061	6.4951e-05	0.00130251	More in Healthy	Strep. mitis	191
group_8506	0.272727	1	-0.727273	2.39194e-06	0.000248761	More in Cancer	Strep. mitis	34
group_8522	0.242424	0.785714	-0.54329	0.000900181	0.0126991	More in Cancer	Strep. mitis	317
group_8537	0.848485	0.0714286	0.777056	7.36241e-07	0.000143151	More in Healthy	Strep. mitis	19
group_8554	0.515152	0	0.515152	0.000580819	0.00846066	More in Healthy	Strep. mitis	301
group_8595	0.515152	0	0.515152	0.000580819	0.00846066	More in Healthy	Strep. mitis	304
group_8605	0	0.5	-0.5	5.45702e-05	0.00130251	More in Cancer	Strep. mitis	223
group_8629	0.0606061	0.642857	-0.582251	6.26081e-05	0.00130251	More in Cancer	Strep. mitis	201
group_8635	0	0.357143	-0.357143	0.00130514	0.0165812	More in Cancer	Strep. mitis	341
group_8702	0.606061	0	0.606061	6.4951e-05	0.00130251	More in Healthy	Strep. mitis	221
group_8711	0.030303	0.5	-0.469697	0.000369713	0.00594732	More in Cancer	Strep. mitis	267
group_8754	0.484848	0	0.484848	0.00157372	0.0165983	More in Healthy	Strep. mitis	369
group_8775	0.030303	0.5	-0.469697	0.000369713	0.00594732	More in Cancer	Strep. mitis	272
group_8791	0.606061	0	0.606061	6.4951e-05	0.00130251	More in Healthy	Strep. mitis	180
group_8848	0.515152	0	0.515152	0.000580819	0.00846066	More in Healthy	Strep. mitis	291
group_8856	0.151515	0.785714	-0.634199	5.9998e-05	0.00130251	More in Cancer	Strep. mitis	174
group_8868	0.606061	0	0.606061	6.4951e-05	0.00130251	More in Healthy	Strep. mitis	200
group_8879	0.30303	1	-0.69697	8.13258e-06	0.000374937	More in Cancer	Strep. mitis	82
group_8935	0	0.357143	-0.357143	0.00130514	0.0165812	More in Cancer	Strep. mitis	344
group_8944	0.030303	0.5	-0.469697	0.000369713	0.00594732	More in Cancer	Strep. mitis	266
group_895	0	0.285714	-0.285714	0.00561209	0.0448165	More in Cancer	Strep. mitis	537
group_8955	0.272727	1	-0.727273	2.39194e-06	0.000248761	More in Cancer	Strep. mitis	33
group_8968	0.606061	0.142857	0.463203	0.00446922	0.042344	More in Healthy	Strep. mitis	467
group_898	0	0.285714	-0.285714	0.00561209	0.0448165	More in Cancer	Strep. mitis	536
group_8992	0.212121	0.928571	-0.71645	6.23983e-06	0.000374937	More in Cancer	Strep. mitis	94
group_8993	0.69697	0	0.69697	8.13258e-06	0.000374937	More in Healthy	Strep. mitis	88
group_8999	0.181818	0.857143	-0.675325	2.27972e-05	0.000910259	More in Cancer	Strep. mitis	112
group_9010	0.575758	0	0.575758	0.00017543	0.00328252	More in Healthy	Strep. mitis	235
group_9017	0.272727	1	-0.727273	2.39194e-06	0.000248761	More in Cancer	Strep. mitis	39
group_9018	0.606061	0	0.606061	6.4951e-05	0.00130251	More in Healthy	Strep. mitis	167
group_9030	0.484848	0	0.484848	0.00157372	0.0165983	More in Healthy	Strep. mitis	401
group_9070	0.606061	0	0.606061	6.4951e-05	0.00130251	More in Healthy	Strep. mitis	182
group_9078	0.30303	1	-0.69697	8.13258e-06	0.000374937	More in Cancer	Strep. mitis	84
group_9105	0.818182	0	0.818182	1.13452e-07	7.24793e-05	More in Healthy	Strep. mitis	6
group_9119	0.606061	0	0.606061	6.4951e-05	0.00130251	More in Healthy	Strep. mitis	163
group_9140	0.484848	0	0.484848	0.00157372	0.0165983	More in Healthy	Strep. mitis	408
group_9146	0.69697	0	0.69697	8.13258e-06	0.000374937	More in Healthy	Strep. mitis	87
group_9157	0.606061	0	0.606061	6.4951e-05	0.00130251	More in Healthy	Strep. mitis	220
group_9168	0.606061	0	0.606061	6.4951e-05	0.00130251	More in Healthy	Strep. mitis	188
group_9188	0.484848	0	0.484848	0.00157372	0.0165983	More in Healthy	Strep. mitis	403
group_9209	0.727273	0.214286	0.512987	0.00280659	0.028332	More in Healthy	Strep. mitis	443
group_9222	0.606061	0.0714286	0.534632	0.000963005	0.0132509	More in Healthy	Strep. mitis	321
group_9231	0.484848	0	0.484848	0.00157372	0.0165983	More in Healthy	Strep. mitis	393
group_9238	0.606061	0	0.606061	6.4951e-05	0.00130251	More in Healthy	Strep. mitis	212
group_9243	0.606061	0	0.606061	6.4951e-05	0.00130251	More in Healthy	Strep. mitis	157
group_9279	0.484848	0	0.484848	0.00157372	0.0165983	More in Healthy	Strep. mitis	370
group_928	0.484848	0	0.484848	0.00157372	0.0165983	More in Healthy	Strep. mitis	420
group_9288	0.575758	0	0.575758	0.00017543	0.00328252	More in Healthy	Strep. mitis	234
group_9303	0.030303	0.5	-0.469697	0.000369713	0.00594732	More in Cancer	Strep. mitis	276
group_9308	0.69697	0.0714286	0.625541	8.85016e-05	0.00174352	More in Healthy	Strep. mitis	226
group_9338	0.515152	0	0.515152	0.000580819	0.00846066	More in Healthy	Strep. mitis	290
group_9350	0.636364	0	0.636364	4.40948e-05	0.00130251	More in Healthy	Strep. mitis	205
group_9351	0.030303	0.5	-0.469697	0.000369713	0.00594732	More in Cancer	Strep. mitis	278
group_9352	0.333333	0.928571	-0.595238	0.000256546	0.00451683	More in Cancer	Strep. mitis	252
group_9361	0.121212	0.571429	-0.450216	0.00257115	0.026073	More in Cancer	Strep. mitis	440
group_9362	0.606061	0	0.606061	6.4951e-05	0.00130251	More in Healthy	Strep. mitis	176
group_9399	0.333333	1	-0.666667	1.39829e-05	0.000595538	More in Cancer	Strep. mitis	102
group_9412	0.606061	0.142857	0.463203	0.00446922	0.042344	More in Healthy	Strep. mitis	466
group_9429	0.30303	1	-0.69697	8.13258e-06	0.000374937	More in Cancer	Strep. mitis	93
group_9445	0.393939	1	-0.606061	6.4951e-05	0.00130251	More in Cancer	Strep. mitis	156
group_9535	0.333333	1	-0.666667	1.39829e-05	0.000595538	More in Cancer	Strep. mitis	101
group_9541	0.0606061	0.428571	-0.367965	0.005412	0.0448165	More in Cancer	Strep. mitis	524
group_9573	0.666667	0.0714286	0.595238	0.000256546	0.00451683	More in Healthy	Strep. mitis	253
group_9603	0.606061	0	0.606061	6.4951e-05	0.00130251	More in Healthy	Strep. mitis	170
group_9615	0	0.285714	-0.285714	0.00561209	0.0448165	More in Cancer	Strep. mitis	510
group_9618	0.606061	0	0.606061	6.4951e-05	0.00130251	More in Healthy	Strep. mitis	155
group_9667	0.575758	0	0.575758	0.00017543	0.00328252	More in Healthy	Strep. mitis	239
group_9680	0.606061	0.142857	0.463203	0.00446922	0.042344	More in Healthy	Strep. mitis	470
group_9812	0.606061	0.0714286	0.534632	0.000963005	0.0132509	More in Healthy	Strep. mitis	322
group_9813	0.69697	0	0.69697	8.13258e-06	0.000374937	More in Healthy	Strep. mitis	79
group_9815	0.30303	1	-0.69697	8.13258e-06	0.000374937	More in Cancer	Strep. mitis	59
group_9820	0	0.285714	-0.285714	0.00561209	0.0448165	More in Cancer	Strep. mitis	517
group_9829	0	0.285714	-0.285714	0.00561209	0.0448165	More in Cancer	Strep. mitis	512
group_9837	0.69697	0	0.69697	8.13258e-06	0.000374937	More in Healthy	Strep. mitis	97
group_9838	0.484848	0	0.484848	0.00157372	0.0165983	More in Healthy	Strep. mitis	417
group_9839	0.606061	0	0.606061	6.4951e-05	0.00130251	More in Healthy	Strep. mitis	196
group_9865	0.545455	0	0.545455	0.000249814	0.00446867	More in Healthy	Strep. mitis	249
group_9872	0.818182	0.285714	0.532468	0.000797526	0.0113223	More in Healthy	Strep. mitis	313
group_9957	0.484848	0	0.484848	0.00157372	0.0165983	More in Healthy	Strep. mitis	407
group_9969	0.484848	0	0.484848	0.00157372	0.0165983	More in Healthy	Strep. mitis	382
lacE...celB	0.272727	1	-0.727273	2.39194e-06	0.000248761	More in Cancer	Strep. mitis	30
lacF	0.272727	1	-0.727273	2.39194e-06	0.000248761	More in Cancer	Strep. mitis	31
lacF...ugpA	1	0.714286	0.285714	0.00561209	0.0448165	More in Healthy	Strep. mitis	490
lacF...ugpA...msmF	0.030303	0.5	-0.469697	0.000369713	0.00594732	More in Cancer	Strep. mitis	263
lacT...bglG	0.272727	1	-0.727273	2.39194e-06	0.000248761	More in Cancer	Strep. mitis	29
licD...licD2	0.181818	0.642857	-0.461039	0.00466659	0.0431305	More in Cancer	Strep. mitis	481
lysR...cysB	0.69697	0	0.69697	8.13258e-06	0.000374937	More in Healthy	Strep. mitis	77
marR...mhqR	0.606061	0	0.606061	6.4951e-05	0.00130251	More in Healthy	Strep. mitis	132
mefA	0.212121	0.857143	-0.645022	5.80078e-05	0.00130251	More in Cancer	Strep. mitis	126
merA	0	0.285714	-0.285714	0.00561209	0.0448165	More in Cancer	Strep. mitis	528
mobA	0.0606061	0.428571	-0.367965	0.005412	0.0448165	More in Cancer	Strep. mitis	498
moeZ...pspE	0.393939	1	-0.606061	6.4951e-05	0.00130251	More in Cancer	Strep. mitis	115
msmE	0.030303	0.5	-0.469697	0.000369713	0.00594732	More in Cancer	Strep. mitis	268
murM...fmhB	0.121212	0.642857	-0.521645	0.000622551	0.00892323	More in Cancer	Strep. mitis	312
mutT	0.69697	0.142857	0.554113	0.000953078	0.0132509	More in Healthy	Strep. mitis	325
mviM	0	0.285714	-0.285714	0.00561209	0.0448165	More in Cancer	Strep. mitis	529
nanE1	0	0.285714	-0.285714	0.00561209	0.0448165	More in Cancer	Strep. mitis	539
narK	0.787879	0	0.787879	3.40355e-07	8.95333e-05	More in Healthy	Strep. mitis	15
nt5e...yfkN	0.818182	0	0.818182	1.13452e-07	7.24793e-05	More in Healthy	Strep. mitis	5
ntpC	0	0.285714	-0.285714	0.00561209	0.0448165	More in Cancer	Strep. mitis	548
ntpF	0	0.285714	-0.285714	0.00561209	0.0448165	More in Cancer	Strep. mitis	546
oorB	0.787879	0	0.787879	3.40355e-07	8.95333e-05	More in Healthy	Strep. mitis	14
pezT	0.181818	0.785714	-0.603896	0.000155163	0.00304337	More in Cancer	Strep. mitis	228
pgk	0.30303	1	-0.69697	8.13258e-06	0.000374937	More in Cancer	Strep. mitis	63
pnuC	0.30303	1	-0.69697	8.13258e-06	0.000374937	More in Cancer	Strep. mitis	85
ppsA	0.454545	0.928571	-0.474026	0.00298247	0.0300397	More in Cancer	Strep. mitis	444
proX	0.606061	0	0.606061	6.4951e-05	0.00130251	More in Healthy	Strep. mitis	140
putP	0	0.285714	-0.285714	0.00561209	0.0448165	More in Cancer	Strep. mitis	508
queF	0.30303	1	-0.69697	8.13258e-06	0.000374937	More in Cancer	Strep. mitis	58
racX	0.484848	0	0.484848	0.00157372	0.0165983	More in Healthy	Strep. mitis	367
rbsC	0.030303	0.5	-0.469697	0.000369713	0.00594732	More in Cancer	Strep. mitis	271
rbsD	0.030303	0.5	-0.469697	0.000369713	0.00594732	More in Cancer	Strep. mitis	270
rbsK	0.030303	0.5	-0.469697	0.000369713	0.00594732	More in Cancer	Strep. mitis	275
rfbD	0.636364	0.142857	0.493506	0.00335136	0.0336038	More in Healthy	Strep. mitis	446
rpiR	0	0.285714	-0.285714	0.00561209	0.0448165	More in Cancer	Strep. mitis	550
rpsR	0.454545	1	-0.545455	0.000249814	0.00446867	More in Cancer	Strep. mitis	243
sarA...aliA	0.939394	0.142857	0.796537	1.41993e-07	7.9374e-05	More in Healthy	Strep. mitis	8
scrA	0.545455	0	0.545455	0.000249814	0.00446867	More in Healthy	Strep. mitis	248
speK	0.606061	0	0.606061	6.4951e-05	0.00130251	More in Healthy	Strep. mitis	168
ssb...ssbA	0.606061	0	0.606061	6.4951e-05	0.00130251	More in Healthy	Strep. mitis	159
sstT	0.30303	1	-0.69697	8.13258e-06	0.000374937	More in Cancer	Strep. mitis	46
ssuD	0.272727	1	-0.727273	2.39194e-06	0.000248761	More in Cancer	Strep. mitis	32
tdh	0.212121	1	-0.787879	3.40355e-07	8.95333e-05	More in Cancer	Strep. mitis	11
tetR...acrR	0.606061	0	0.606061	6.4951e-05	0.00130251	More in Healthy	Strep. mitis	177
thiE1...thiE	0.272727	0.928571	-0.655844	5.03819e-05	0.00130251	More in Cancer	Strep. mitis	179
thiM	0.272727	0.928571	-0.655844	5.03819e-05	0.00130251	More in Cancer	Strep. mitis	178
tnp...tra5	0.030303	0.928571	-0.898268	1.35521e-09	3.03026e-06	More in Cancer	Strep. mitis	1
vanW	0.030303	0.357143	-0.32684	0.00643246	0.0493413	More in Cancer	Strep. mitis	571
wbbI	0.606061	0	0.606061	6.4951e-05	0.00130251	More in Healthy	Strep. mitis	166
wcaA	0.181818	0.642857	-0.461039	0.00466659	0.0431305	More in Cancer	Strep. mitis	483
wefC...capG...wcwK	0.515152	0	0.515152	0.000580819	0.00846066	More in Healthy	Strep. mitis	287
xerC...xerS	0.242424	0.714286	-0.471861	0.00363223	0.0361654	More in Cancer	Strep. mitis	449
yceG	0.030303	0.928571	-0.898268	1.35521e-09	3.03026e-06	More in Cancer	Strep. mitis	2
ydiL...blpY	0.818182	0.285714	0.532468	0.000797526	0.0113223	More in Healthy	Strep. mitis	314
ydjP	0.909091	0.142857	0.766234	6.7045e-07	0.000143151	More in Healthy	Strep. mitis	20
yhaI	0.606061	0	0.606061	6.4951e-05	0.00130251	More in Healthy	Strep. mitis	213
yheS...msr...msrD	0.212121	0.857143	-0.645022	5.80078e-05	0.00130251	More in Cancer	Strep. mitis	127
yicI	0.121212	0.642857	-0.521645	0.000622551	0.00892323	More in Cancer	Strep. mitis	311
ylqF	0.515152	1	-0.484848	0.00157372	0.0165983	More in Cancer	Strep. mitis	354
ytnP	0.69697	0	0.69697	8.13258e-06	0.000374937	More in Healthy	Strep. mitis	70

## Sheet: Strep__parasanguinis
Supplementary Table S8: Streptococcus parasanguinis gene-specific enrichment
Gene	Freq_Healthy	Freq_Cancer	Freq_Diff	PValue	AdjPValue	Group	Species	Rank
group_14982	0.125	1	-0.875	1.56869e-05	0.0317637	More in Cancer	Strep. parasanguinis	1
group_15226	0	0.75	-0.75	3.08985e-05	0.0317637	More in Cancer	Strep. parasanguinis	2
group_9875	0	0.75	-0.75	3.08985e-05	0.0317637	More in Cancer	Strep. parasanguinis	3

## Sheet: Strep__salivarius
Supplementary Table S9: Streptococcus salivaris gene-specific enrichment
Gene	Freq_Healthy	Freq_Cancer	Freq_Diff	PValue	AdjPValue	Group	Species	Rank
group_15137	0	0.5	-0.5	8.10028e-05	0.0440925	More in Cancer	Strep. salivarius	1
yjbJ...csbD	0	0.5	-0.5	8.10028e-05	0.0440925	More in Cancer	Strep. salivarius	2
tnpA	0	0.5	-0.5	8.10028e-05	0.0440925	More in Cancer	Strep. salivarius	3
group_19080	0	0.5	-0.5	8.10028e-05	0.0440925	More in Cancer	Strep. salivarius	4
group_24264	0	0.5	-0.5	8.10028e-05	0.0440925	More in Cancer	Strep. salivarius	5
group_19079	0	0.5	-0.5	8.10028e-05	0.0440925	More in Cancer	Strep. salivarius	6
